# Supplementary material for: A community-oriented, data-driven resource to improve protocol design for cardiac modelling from human pluripotent stem cells
Source: Research Square preprint supplement (doi:10.21203/rs.3.rs-5017297/v1), 2024-09-27
Supplement: Supplementary file 1 [file 135215d70fba9b2c2fd42d6b.xlsx]

## Sheet: 4_ProtoGainSigBest_25Aug24
Target Label	Prioritised Features	Entropy Value	Entropy Conf	Gini Index Value	Gini Index Conf	AvgInfoGain	Best logP_val
3D Estimated Tissue Cell Density (10^6 cells/mL) (120)	3D Platform - Scaffold Free (43)	0.0442447	0	0.0457722	0	0.0450085	3.30103
3D Estimated Tissue Cell Density (10^6 cells/mL) (120)	3D Platform - Collagen (37)	0.0331146	0	0.0383852	0	0.0357499	3.30103
3D Estimated Tissue Cell Density (10^6 cells/mL) (120)	3D Platform - Fibrin (50)	0.0219356	0.001	0.0220959	0	0.0220158	3.30103
3D Estimated Tissue Cell Density (10^6 cells/mL) (120)	3D Estimated Tissue Size (mm2) Q1 <0.28 (34)	0.0176289	0.001	0.0153096	0.0025	0.0164693	3
3D Estimated Tissue Cell Density (10^6 cells/mL) (120)	Tension Maturation (64)	0.0146149	0.0045	0.01332	0.0075	0.0139675	2.34679
3D Estimated Tissue Cell Density (10^6 cells/mL) (120)	Force (mN) Quantiles (48)	0.0144675	0.044	0.0130169	0.0815	0.0137422	1.35655
3D Estimated Tissue Cell Density (10^6 cells/mL) (120)	3D Platform - Matrigel (32)	0.0126944	0.012	0.011761	0.0125	0.0122277	1.92082
3D Estimated Tissue Cell Density (10^6 cells/mL) (120)	Force (mN) - Reported (48)	0.0126823	0.014	0.0142776	0.0065	0.0134799	2.18709
3D Estimated Tissue Cell Density (10^6 cells/mL) (120)	3D Estimated Tissue Size (mm2) Quantiles (133)	0.0124847	0.539	0.0120547	0.5	0.0122697	0.30103
3D Estimated Tissue Cell Density (10^6 cells/mL) (120)	Insulin Addition - prior Day 8 (149)	0.0111951	0.045	0.0103329	0.0525	0.010764	1.34679
3D Estimated Tissue Cell Density (10^6 cells/mL) (120)	Stress (mN/mm2) Quantiles (37)	0.0110787	0.1545	0.0112318	0.1245	0.0111553	0.904831
3D Estimated Tissue Cell Density (10^6 cells/mL) (120)	3D Estimated Tissue Size (mm2) Q3 4 to 20 (33)	0.010755	0.026	0.0101897	0.025	0.0104724	1.60206
3D Estimated Tissue Cell Density (10^6 cells/mL) (120)	3D EC % Composition - <10 (120)	0.0106744	0.022	0.00740918	0.091	0.00904181	1.65758
3D Estimated Tissue Cell Density (10^6 cells/mL) (120)	Contractile Analysis Method - Post Deflection (39)	0.00948212	0.0455	0.010489	0.0275	0.00998558	1.56067
3D Estimated Tissue Cell Density (10^6 cells/mL) (120)	Upstroke Velocity (um/s) Quantiles (40)	0.00914297	0.0685	0.00722946	0.1945	0.00818621	1.16431
3D Estimated Tissue Cell Density (10^6 cells/mL) (120)	Pharmacological Interventions - Reported (141)	0.00901066	0.1015	0.00919269	0.0835	0.00910167	1.07831
3D Estimated Tissue Cell Density (10^6 cells/mL) (120)	Insulin Addition - after Day 7 (26)	0.00897572	0.0245	0.00894248	0.0195	0.0089591	1.70997
3D Estimated Tissue Cell Density (10^6 cells/mL) (120)	Wnt Inhibitor - IWR (54)	0.00889735	0.0365	0.00481324	0.315	0.00685529	1.43771
3D Estimated Tissue Cell Density (10^6 cells/mL) (120)	Differentiation Purity % - Reported (153)	0.0087263	0.0845	0.00604482	0.348	0.00738556	1.07314
3D Estimated Tissue Cell Density (10^6 cells/mL) (120)	Stress (mN/mm2) - Reported (37)	0.00830081	0.049	0.00872213	0.0355	0.00851147	1.44977
3D Estimated Tissue Cell Density (10^6 cells/mL) (120)	3D Stromal Cell Type - Reported (77)	0.00829866	0.14	0.00892568	0.074	0.00861217	1.13077
3D Estimated Tissue Cell Density (10^6 cells/mL) (120)	3D Tissue Media - DMEM (53)	0.00810991	0.1135	0.00746612	0.1335	0.00778801	0.945004
3D Estimated Tissue Cell Density (10^6 cells/mL) (120)	3D CM % Composition - >74 (115)	0.0078905	0.131	0.00563448	0.373	0.00676249	0.882729
3D Estimated Tissue Cell Density (10^6 cells/mL) (120)	3D % Confluency - Reported (239)	0.00784313	0.1645	0.00597086	0.369	0.006907	0.783834
3D Estimated Tissue Cell Density (10^6 cells/mL) (120)	hiPSC Backbone Media - Essential 8 (82)	0.00784062	0.1115	0.00765263	0.1025	0.00774663	0.989276
3D Estimated Tissue Cell Density (10^6 cells/mL) (120)	Time to Peak (ms) Quantiles (41)	0.00740249	0.295	0.00556815	0.6575	0.00648532	0.530178
3D Estimated Tissue Cell Density (10^6 cells/mL) (120)	hiPSC Backbone Media - mTeSR (102)	0.0072039	0.216	0.00650968	0.265	0.00685679	0.665546
3D Estimated Tissue Cell Density (10^6 cells/mL) (120)	Ancestry of hiPSC Lines - Known (71)	0.00694799	0.219	0.00814861	0.0885	0.0075483	1.05306
3D Estimated Tissue Cell Density (10^6 cells/mL) (120)	Induction Conditions - BMP4 (74)	0.00662994	0.25	0.0070609	0.163	0.00684542	0.787812
3D Estimated Tissue Cell Density (10^6 cells/mL) (120)	Induction Duration - 2 days (71)	0.00659792	0.213	0.00757557	0.112	0.00708674	0.950782
3D Estimated Tissue Cell Density (10^6 cells/mL) (120)	Other Cells Maturation (77)	0.00654618	0.367	0.00655641	0.2915	0.0065513	0.535361
3D Estimated Tissue Cell Density (10^6 cells/mL) (120)	3D % Confluency - 2D/3D Values (154)	0.00642727	0.402	0.00431403	0.775	0.00537065	0.395774
3D Estimated Tissue Cell Density (10^6 cells/mL) (120)	3D Estimated Tissue Size (mm2) Q2 0.28 to 4 (34)	0.00640584	0.205	0.00694623	0.1425	0.00667603	0.846185
3D Estimated Tissue Cell Density (10^6 cells/mL) (120)	Calcium Handling Analysis Method - Reported (124)	0.00625295	0.342	0.00452917	0.6485	0.00539106	0.465974
3D Estimated Tissue Cell Density (10^6 cells/mL) (120)	3D Estimated Tissue Size (mm2) Q3 >20 (32)	0.00619664	0.2405	0.00276465	0.9185	0.00448064	0.618885
3D Estimated Tissue Cell Density (10^6 cells/mL) (120)	Force (mN) - Q2 (12)	0.00617244	0.0365	0.00611272	0.0315	0.00614258	1.50169
3D Estimated Tissue Cell Density (10^6 cells/mL) (120)	Ancestry of hiPSC Lines - Asian (30)	0.00612118	0.143	0.00457194	0.3405	0.00534656	0.844664
3D Estimated Tissue Cell Density (10^6 cells/mL) (120)	Wnt Inhibitor - IWP (110)	0.00585839	0.454	0.00457606	0.664	0.00521723	0.342944
3D Estimated Tissue Cell Density (10^6 cells/mL) (120)	3D Stromal Cell Type - hCF (30)	0.00584975	0.352	0.00548617	0.3805	0.00566796	0.453457
3D Estimated Tissue Cell Density (10^6 cells/mL) (120)	Wnt Inhibition Duration - 2 days (152)	0.00581944	0.521	0.00546144	0.5245	0.00564044	0.283162
3D Estimated Tissue Cell Density (10^6 cells/mL) (120)	Contractile Analysis Method - Force Transducer (26)	0.00577425	0.141	0.00468388	0.3005	0.00522907	0.850781
3D Estimated Tissue Cell Density (10^6 cells/mL) (120)	hiPSC Line - BJ1 (7)	0.00574347	0.007	0.00416942	0.023	0.00495645	2.1549
3D Estimated Tissue Cell Density (10^6 cells/mL) (120)	Sex of hiPSC Lines - Male (64)	0.00571415	0.363	0.00583087	0.3105	0.00577251	0.507938
3D Estimated Tissue Cell Density (10^6 cells/mL) (120)	Insulin Addition - Induction (172)	0.00567346	0.522	0.00820422	0.113	0.00693884	0.946922
3D Estimated Tissue Cell Density (10^6 cells/mL) (120)	hiPSC-CM Backbone Media - iCell Maintenance Medium (86)	0.00555679	0.392	0.003805	0.747	0.0046809	0.406714
3D Estimated Tissue Cell Density (10^6 cells/mL) (120)	Insulin Addition - Reported (175)	0.00554762	0.544	0.0061871	0.3235	0.00586736	0.490126
3D Estimated Tissue Cell Density (10^6 cells/mL) (120)	Wnt Inhibition Duration - >6 days (12)	0.00548264	0.0515	0.00571379	0.037	0.00559822	1.4318
3D Estimated Tissue Cell Density (10^6 cells/mL) (120)	Upstroke Velocity (um/s) - Reported (40)	0.00544153	0.117	0.00636461	0.0575	0.00590307	1.24033
3D Estimated Tissue Cell Density (10^6 cells/mL) (120)	Purification Stategy - Glucose & Lactate (85)	0.0054388	0.5295	0.00280308	0.9645	0.00412094	0.276134
3D Estimated Tissue Cell Density (10^6 cells/mL) (120)	hiPSC Backbone Media - Specialised (17)	0.00537089	0.098	0.00844571	0.012	0.0069083	1.92082
3D Estimated Tissue Cell Density (10^6 cells/mL) (120)	Sarcomere/Cellular Alignment Analysis (67)	0.00533179	0.3065	0.00380013	0.6245	0.00456596	0.51357
3D Estimated Tissue Cell Density (10^6 cells/mL) (120)	Contractile Analysis Method - Motion Tracking (88)	0.00531426	0.4675	0.00426083	0.698	0.00478755	0.330218
3D Estimated Tissue Cell Density (10^6 cells/mL) (120)	hiPSC-CM Backbone Media - DMEM (18)	0.00518593	0.0055	0.00750207	0	0.006344	3.30103
3D Estimated Tissue Cell Density (10^6 cells/mL) (120)	Sarcomere Length (um) Quantiles (64)	0.005168	0.665	0.00719184	0.2735	0.00617992	0.563043
3D Estimated Tissue Cell Density (10^6 cells/mL) (120)	Contractile Analysis Method - Reported(163)	0.00484097	0.484	0.00328829	0.8575	0.00406463	0.315155
3D Estimated Tissue Cell Density (10^6 cells/mL) (120)	Differentiation Purity Assessment - Reported (167)	0.00475387	0.7235	0.00426817	0.7615	0.00451102	0.140561
3D Estimated Tissue Cell Density (10^6 cells/mL) (120)	Induction Duration - 3 days (37)	0.00472882	0.408	0.0081917	0.05	0.00646026	1.30103
3D Estimated Tissue Cell Density (10^6 cells/mL) (120)	Time to Peak (ms) - Reported (41)	0.00465899	0.389	0.00476815	0.3415	0.00471357	0.466609
3D Estimated Tissue Cell Density (10^6 cells/mL) (120)	3D SC % Composition - <25 (120)	0.00464418	0.589	0.00367845	0.7835	0.00416132	0.229885
3D Estimated Tissue Cell Density (10^6 cells/mL) (120)	3D Tissue Media - B27 (67)	0.00463077	0.7275	0.00412713	0.783	0.00437895	0.138167
3D Estimated Tissue Cell Density (10^6 cells/mL) (120)	Wnt Inhibitor - Reported (227)	0.00458806	0.498	0.00282553	0.8895	0.00370679	0.302771
3D Estimated Tissue Cell Density (10^6 cells/mL) (120)	Ancestry of hiPSC Lines - Caucasian (42)	0.00458284	0.4145	0.00560688	0.205	0.00509486	0.688246
3D Estimated Tissue Cell Density (10^6 cells/mL) (120)	Induction Conditions - bFGF (45)	0.00457964	0.5345	0.00488609	0.403	0.00473286	0.394695
3D Estimated Tissue Cell Density (10^6 cells/mL) (120)	Metabolic Analysis Method - Reported (45)	0.00455674	0.3005	0.00241775	0.824	0.00348724	0.522156
3D Estimated Tissue Cell Density (10^6 cells/mL) (120)	3D Endothelial Cell Type - HUVEC (9)	0.00449899	0.0725	0.00376941	0.1365	0.0041342	1.13966
3D Estimated Tissue Cell Density (10^6 cells/mL) (120)	hiPSC Line - WTC11 (30)	0.00449645	0.3595	0.0056083	0.154	0.00505237	0.812479
3D Estimated Tissue Cell Density (10^6 cells/mL) (120)	3D EC % Composition - >9 (30)	0.00442864	0.561	0.00461509	0.487	0.00452187	0.312471
3D Estimated Tissue Cell Density (10^6 cells/mL) (120)	hiPSC-CM Backbone Media - RPMI-1640 (161)	0.00441794	0.8135	0.00497675	0.6065	0.00469734	0.217169
3D Estimated Tissue Cell Density (10^6 cells/mL) (120)	Sarcomere Length (um) - Mature Q2 1.7 to 1.9 (28)	0.00440788	0.0435	0.00548297	0.02	0.00494543	1.69897
3D Estimated Tissue Cell Density (10^6 cells/mL) (120)	Gene Analysis Method - Reported (167)	0.00436432	0.8385	0.0035732	0.9035	0.00396876	0.0764969
3D Estimated Tissue Cell Density (10^6 cells/mL) (120)	3D Tissue Media - Reported (157)	0.0043348	0.3515	0.00364652	0.5085	0.00399066	0.454075
3D Estimated Tissue Cell Density (10^6 cells/mL) (120)	Induction Conditions - Activin A (75)	0.00432831	0.7925	0.00624524	0.29	0.00528677	0.537602
3D Estimated Tissue Cell Density (10^6 cells/mL) (120)	hiPSC-CM Media Supplement - 1-thioglycerol (14)	0.00428554	0.09	0.00435864	0.087	0.00432209	1.06048
3D Estimated Tissue Cell Density (10^6 cells/mL) (120)	2D % Confluency - 2D/3D Values (154)	0.004154	0.8875	0.0042797	0.7905	0.00421685	0.102098
3D Estimated Tissue Cell Density (10^6 cells/mL) (120)	hiPSC-CM Matrix Coating if Replated - Matrigel (64)	0.00413463	0.41	0.00289307	0.7555	0.00351385	0.387216
3D Estimated Tissue Cell Density (10^6 cells/mL) (120)	Mechanical Maturation (34)	0.00411521	0.3555	0.00385046	0.4155	0.00398284	0.44916
3D Estimated Tissue Cell Density (10^6 cells/mL) (120)	Beat Rate (beats per minute) Quantiles (54)	0.00406944	0.961	0.00540094	0.772	0.00473519	0.112383
3D Estimated Tissue Cell Density (10^6 cells/mL) (120)	3D Tissue Media - RPMI-1640 (71)	0.00404145	0.865	0.00365791	0.869	0.00384968	0.0629839
3D Estimated Tissue Cell Density (10^6 cells/mL) (120)	3D Platform - Decellularised (15)	0.00401448	0.1395	0.00298331	0.3525	0.0034989	0.855426
3D Estimated Tissue Cell Density (10^6 cells/mL) (120)	3D CM % Composition - <75 (35)	0.00399957	0.752	0.00215537	0.983	0.00307747	0.123782
3D Estimated Tissue Cell Density (10^6 cells/mL) (120)	Differentiation Purity % - 95 to 100 (35)	0.00399703	0.356	0.00507937	0.148	0.0045382	0.829738
3D Estimated Tissue Cell Density (10^6 cells/mL) (120)	hiPSC Backbone Media - Reported (228)	0.00392487	0.7	0.00594561	0.239	0.00493524	0.621602
3D Estimated Tissue Cell Density (10^6 cells/mL) (120)	hiPSC Line - iCell (46)	0.00383918	0.425	0.00314563	0.636	0.00349241	0.371611
3D Estimated Tissue Cell Density (10^6 cells/mL) (120)	Induction Duration - Reported (230)	0.00379968	0.6945	0.00277021	0.9025	0.00328495	0.158328
3D Estimated Tissue Cell Density (10^6 cells/mL) (120)	Induction Duration - 1 days (99)	0.00379708	0.912	0.00264379	0.977	0.00322043	0.0400052
3D Estimated Tissue Cell Density (10^6 cells/mL) (120)	Differentiation Purity Assessment - Flow Cytometry cTnT+ (134)	0.00377993	0.9185	0.00402551	0.8165	0.00390272	0.0880438
3D Estimated Tissue Cell Density (10^6 cells/mL) (120)	Number of hiPSC Lines - 3 (27)	0.00371827	0.2915	0.00445465	0.176	0.00408646	0.754487
3D Estimated Tissue Cell Density (10^6 cells/mL) (120)	Extracellular Matrix Maturation (18)	0.00368604	0.1595	0.00311766	0.29	0.00340185	0.797239
3D Estimated Tissue Cell Density (10^6 cells/mL) (120)	Beat Rate (beats per minute) - Reported (54)	0.00367062	0.6425	0.00442519	0.387	0.00404791	0.412289
3D Estimated Tissue Cell Density (10^6 cells/mL) (120)	Electrophysiology Analysis Method - Optical Mapping (39)	0.00364067	0.7285	0.00232335	0.952	0.00298201	0.13757
3D Estimated Tissue Cell Density (10^6 cells/mL) (120)	Resting Membrane Potential (mV) Quantiles (44)	0.00357073	0.87	0.00400797	0.807	0.00378935	0.0931265
3D Estimated Tissue Cell Density (10^6 cells/mL) (120)	hiPSC Line - DF19-9-11T.H (16)	0.00356453	0.0515	0.0029356	0.1375	0.00325006	1.28819
3D Estimated Tissue Cell Density (10^6 cells/mL) (120)	Electrophysiology Analysis Method - Reported (117)	0.00349129	0.9495	0.00234765	0.994	0.00291947	0.022505
3D Estimated Tissue Cell Density (10^6 cells/mL) (120)	Electrical Maturation (38)	0.00349093	0.6735	0.00311298	0.7355	0.00330196	0.171662
3D Estimated Tissue Cell Density (10^6 cells/mL) (120)	Differentiation Purity % - 80 to 84 (25)	0.00347893	0.3535	0.00331587	0.381	0.0033974	0.451611
3D Estimated Tissue Cell Density (10^6 cells/mL) (120)	3D Endothelial Cell Type - hiPSC-EC (16)	0.00347875	0.4835	0.00160303	0.947	0.00254089	0.315604
3D Estimated Tissue Cell Density (10^6 cells/mL) (120)	hiPSC-CM Media Supplement - B27 (174)	0.00347281	0.965	0.00323531	0.957	0.00335406	0.0190881
3D Estimated Tissue Cell Density (10^6 cells/mL) (120)	Max Capture Rate (Hz) Quantiles (15)	0.00344524	0.5585	0.00321936	0.6355	0.0033323	0.252977
3D Estimated Tissue Cell Density (10^6 cells/mL) (120)	Beat Rate (beats per minute) - Q1 (15)	0.0034231	0.1505	0.00101412	0.919	0.00221861	0.822464
3D Estimated Tissue Cell Density (10^6 cells/mL) (120)	Calcium Handling Analysis Method - Dye (99)	0.00342212	0.925	0.00579862	0.361	0.00461037	0.442493
3D Estimated Tissue Cell Density (10^6 cells/mL) (120)	Stress (mN/mm2) - Q2 (9)	0.00341099	0.187	0.0024066	0.457	0.0029088	0.728158
3D Estimated Tissue Cell Density (10^6 cells/mL) (120)	hiPSC-CM Media Supplement - FBS (16)	0.0033897	0.0975	0.00246647	0.2675	0.00292809	1.011
3D Estimated Tissue Cell Density (10^6 cells/mL) (120)	AP Conduction Velocity (cm/s) Quantiles (28)	0.00336634	0.6925	0.00328824	0.7755	0.00332729	0.15958
3D Estimated Tissue Cell Density (10^6 cells/mL) (120)	2D % Confluency - Reported (236)	0.00330486	0.969	0.00286138	0.971	0.00308312	0.0136762
3D Estimated Tissue Cell Density (10^6 cells/mL) (120)	Sex of hiPSC Lines - Known (116)	0.00327002	0.97	0.00273828	0.981	0.00300415	0.0132283
3D Estimated Tissue Cell Density (10^6 cells/mL) (120)	Purification Duration - 4 days (28)	0.00326709	0.6755	0.00353563	0.5795	0.00340136	0.236947
3D Estimated Tissue Cell Density (10^6 cells/mL) (120)	Calcium Handling Analysis Method - Genetical (23)	0.00324353	0.4085	0.0021284	0.7755	0.00268596	0.388808
3D Estimated Tissue Cell Density (10^6 cells/mL) (120)	Wnt Inhibitor - DS-I-7 (11)	0.00318705	0.2365	0.00336913	0.192	0.00327809	0.716699
3D Estimated Tissue Cell Density (10^6 cells/mL) (120)	hiPSC-CM Matrix Coating if Replated - Reported (152)	0.00317924	0.9535	0.00451002	0.628	0.00384463	0.20204
3D Estimated Tissue Cell Density (10^6 cells/mL) (120)	AP Conduction Velocity (cm/s) - Reported (28)	0.00315607	0.4175	0.0037427	0.275	0.00344939	0.560667
3D Estimated Tissue Cell Density (10^6 cells/mL) (120)	2D Surface - Reported (137)(177)	0.00314399	0.7005	0.00371626	0.509	0.00343013	0.293282
3D Estimated Tissue Cell Density (10^6 cells/mL) (120)	Induction Duration - 4 days (15)	0.00309411	0.024	0.00352252	0.015	0.00330832	1.82391
3D Estimated Tissue Cell Density (10^6 cells/mL) (120)	3D Endothelial Cell Type - Reported (33)	0.00307356	0.925	0.00353468	0.778	0.00330412	0.10902
3D Estimated Tissue Cell Density (10^6 cells/mL) (120)	Cell Alignment Maturation (55)	0.00305588	0.592	0.00194017	0.9055	0.00249802	0.227678
3D Estimated Tissue Cell Density (10^6 cells/mL) (120)	Pharmacological Interventions - Isoproterenol (70)	0.00305161	0.9625	0.00194622	0.9945	0.00249892	0.0165993
3D Estimated Tissue Cell Density (10^6 cells/mL) (120)	Purification Stategy - Reported (101)	0.00304998	0.99	0.0024237	0.992	0.00273684	0.00436481
3D Estimated Tissue Cell Density (10^6 cells/mL) (120)	Transmission Electron Microscopy (62)	0.00304714	0.9475	0.00458854	0.588	0.00381784	0.230623
3D Estimated Tissue Cell Density (10^6 cells/mL) (120)	Wnt Inhibitor - XAV939 (23)	0.00299997	0.329	0.00144091	0.84	0.00222044	0.482804
3D Estimated Tissue Cell Density (10^6 cells/mL) (120)	Max Capture Rate (Hz) - Q1 (8)	0.00299769	0.1345	0.00305445	0.1305	0.00302607	0.884389
3D Estimated Tissue Cell Density (10^6 cells/mL) (120)	hiPSC-CM Backbone Media - StemPro-34 (14)	0.00295584	0.075	0.00246593	0.177	0.00271089	1.12494
3D Estimated Tissue Cell Density (10^6 cells/mL) (120)	Resting Membrane Potential (mV) - Reported (44)	0.00293365	0.6965	0.00132689	0.986	0.00213027	0.157079
3D Estimated Tissue Cell Density (10^6 cells/mL) (120)	Gene Analysis Method - PCR (131)	0.00290901	0.9845	0.00379662	0.87	0.00335282	0.0604807
3D Estimated Tissue Cell Density (10^6 cells/mL) (120)	Amplitude (F/F0) Quantiles (50)	0.00289097	0.998	0.00359914	0.978	0.00324505	0.00966115
3D Estimated Tissue Cell Density (10^6 cells/mL) (120)	Amplitude (F/F0) - Reported (50)	0.00283113	0.857	0.00151031	0.991	0.00217072	0.0670192
3D Estimated Tissue Cell Density (10^6 cells/mL) (120)	Induction Conditions - CHIR99021 (174)	0.00273955	0.9915	0.00311246	0.951	0.002926	0.0218195
3D Estimated Tissue Cell Density (10^6 cells/mL) (120)	Induction Conditions - Reported (238)	0.00273171	0.9075	0.00351134	0.7095	0.00312153	0.149048
3D Estimated Tissue Cell Density (10^6 cells/mL) (120)	Metabolic Maturation Strategy - T3 (14)	0.00271351	0.051	0.000731888	0.7625	0.0017227	1.29243
3D Estimated Tissue Cell Density (10^6 cells/mL) (120)	Purification Duration - Reported (88)	0.00270519	0.9935	0.00237655	0.9935	0.00254087	0.00283213
3D Estimated Tissue Cell Density (10^6 cells/mL) (120)	3D Platform - Polyethylene Glycol (8)	0.00262158	0.044	0.00221985	0.0885	0.00242071	1.35655
3D Estimated Tissue Cell Density (10^6 cells/mL) (120)	Stress (mN/mm2) - Q4 (9)	0.00260609	0.1105	0.00227783	0.2115	0.00244196	0.956638
3D Estimated Tissue Cell Density (10^6 cells/mL) (120)	hiPSC Line - Gibco episomal (10)	0.00258286	0.109	0.00178147	0.378	0.00218217	0.962574
3D Estimated Tissue Cell Density (10^6 cells/mL) (120)	CM Immunofluorescent Imaging (261)	0.00258016	0.798	0.00338546	0.5755	0.00298281	0.239955
3D Estimated Tissue Cell Density (10^6 cells/mL) (120)	3D Stromal Cell Type - hMSC (12)	0.00251947	0.3695	0.00179234	0.723	0.00215591	0.432386
3D Estimated Tissue Cell Density (10^6 cells/mL) (120)	Time to Peak (ms) - Q4 (10)	0.00251825	0.023	0.00224673	0.056	0.00238249	1.63827
3D Estimated Tissue Cell Density (10^6 cells/mL) (120)	hiPSC-CM Matrix Coating if Replated - Gelatin (43)	0.00247641	0.694	0.00201591	0.8375	0.00224616	0.158641
3D Estimated Tissue Cell Density (10^6 cells/mL) (120)	hiPSC-CM Media Supplement - L-glutamine (19)	0.00241041	0.146	0.00440725	0.02	0.00340883	1.69897
3D Estimated Tissue Cell Density (10^6 cells/mL) (120)	Purification Duration - 6 days (10)	0.00240778	0.143	0.0010772	0.7515	0.00174249	0.844664
3D Estimated Tissue Cell Density (10^6 cells/mL) (120)	3D Stromal Cell Type - SC (34)	0.00240209	0.959	0.00370203	0.6955	0.00305206	0.157703
3D Estimated Tissue Cell Density (10^6 cells/mL) (120)	Stress (mN/mm2) - Q3 (9)	0.00239267	0.481	0.00182245	0.6995	0.00210756	0.317855
3D Estimated Tissue Cell Density (10^6 cells/mL) (120)	hiPSC Backbone Media - Embryonic Stem Cell (20)	0.00237049	0.4015	0.00221129	0.4695	0.00229089	0.396314
3D Estimated Tissue Cell Density (10^6 cells/mL) (120)	hiPSC Line - Specialised (121)	0.00235647	0.994	0.00237178	0.989	0.00236412	0.00480371
3D Estimated Tissue Cell Density (10^6 cells/mL) (120)	Sarcomere Length (um) Q3 >1.9 (17)	0.00234961	0.302	0.00203756	0.468	0.00219358	0.519993
3D Estimated Tissue Cell Density (10^6 cells/mL) (120)	hiPSC-CM Media Supplement - iCell Maintenance Medium (41)	0.00231318	0.767	0.00199321	0.8735	0.0021532	0.115205
3D Estimated Tissue Cell Density (10^6 cells/mL) (120)	hiPSC-CM Media Supplement - L-ascorbic acid (39)	0.00226539	0.965	0.0015591	0.994	0.00191224	0.0154727
3D Estimated Tissue Cell Density (10^6 cells/mL) (120)	Electrophysiology Analysis Method - Microelectrode (29)	0.00225012	0.429	0.0015534	0.7685	0.00190176	0.367543
3D Estimated Tissue Cell Density (10^6 cells/mL) (120)	3D Stromal Cell Type - hiPSC-CF (8)	0.00222083	0.5175	0.00176447	0.7445	0.00199265	0.28609
3D Estimated Tissue Cell Density (10^6 cells/mL) (120)	Elastomeric Maturation (33)	0.00220823	0.338	0.000626577	0.965	0.0014174	0.471083
3D Estimated Tissue Cell Density (10^6 cells/mL) (120)	3D Tissue Media - Iscove (5)	0.00215529	0.2205	0.00193956	0.346	0.00204743	0.656591
3D Estimated Tissue Cell Density (10^6 cells/mL) (120)	Differentiation Purity Assessment - Specialised (10)	0.00212751	0.0495	0.00127446	0.3165	0.00170098	1.30539
3D Estimated Tissue Cell Density (10^6 cells/mL) (120)	3D SC % Composition - >24 (30)	0.00212086	0.984	0.00169861	0.996	0.00190974	0.0070049
3D Estimated Tissue Cell Density (10^6 cells/mL) (120)	Disease Modelling - Reported (50)	0.00211663	0.975	0.00323354	0.7635	0.00267509	0.117191
3D Estimated Tissue Cell Density (10^6 cells/mL) (120)	Amplitude (F/F0) - Q2 (13)	0.00210191	0.2815	0.00238561	0.27	0.00224376	0.568636
3D Estimated Tissue Cell Density (10^6 cells/mL) (120)	Force (mN) - Q3 (11)	0.00209946	0.5945	0.00211646	0.5895	0.00210796	0.229516
3D Estimated Tissue Cell Density (10^6 cells/mL) (120)	3D Tissue Media - High-glucose DMEM (7)	0.00208207	0.2535	0.00167309	0.446	0.00187758	0.596022
3D Estimated Tissue Cell Density (10^6 cells/mL) (120)	Gene Analysis Method - RNA (57)	0.00203889	0.9875	0.00255293	0.9445	0.00229591	0.024798
3D Estimated Tissue Cell Density (10^6 cells/mL) (120)	hiPSC Line - ATCC (5)	0.00202836	0.057	0.00150251	0.1945	0.00176544	1.24413
3D Estimated Tissue Cell Density (10^6 cells/mL) (120)	Number of hiPSC Lines - 1 (218)	0.00202585	0.996	0.00290861	0.948	0.00246723	0.0231917
3D Estimated Tissue Cell Density (10^6 cells/mL) (120)	hiPSC-CM Maintenance/Maturation Media (if different) - RPMI-1640 (26)	0.00202063	0.842	0.00194387	0.877	0.00198225	0.0746879
3D Estimated Tissue Cell Density (10^6 cells/mL) (120)	3D Platform - 3D printed (9)	0.00200278	0.471	0.0010335	0.894	0.00151814	0.326979
3D Estimated Tissue Cell Density (10^6 cells/mL) (120)	hiPSC Line - C25 (6)	0.00199852	0.3745	0.00237413	0.2835	0.00218632	0.547447
3D Estimated Tissue Cell Density (10^6 cells/mL) (120)	Force (mN) - Q1 (13)	0.00199501	0.285	0.000571215	0.934	0.00128311	0.545155
3D Estimated Tissue Cell Density (10^6 cells/mL) (120)	Wnt Inhibition Duration - Reported (222)	0.00196428	0.992	0.00266746	0.935	0.00231587	0.0291884
3D Estimated Tissue Cell Density (10^6 cells/mL) (120)	3D Platform - Fibronectin (3)	0.00195728	0.099	0.00235862	0.072	0.00215795	1.14267
3D Estimated Tissue Cell Density (10^6 cells/mL) (120)	Number of hiPSC Lines - 2 (50)	0.00195216	0.944	0.00146989	0.982	0.00171102	0.025028
3D Estimated Tissue Cell Density (10^6 cells/mL) (120)	Metabolic Maturation (30)	0.00194195	0.4695	0.0011487	0.8425	0.00154532	0.328364
3D Estimated Tissue Cell Density (10^6 cells/mL) (120)	Differentiation Purity % - 90 to 94 (37)	0.00193002	0.9225	0.00273001	0.7315	0.00233002	0.135786
3D Estimated Tissue Cell Density (10^6 cells/mL) (120)	Electrophysiology Analysis Method - Patch Clamp (55)	0.00191195	0.961	0.0012962	0.993	0.00160408	0.0172766
3D Estimated Tissue Cell Density (10^6 cells/mL) (120)	hiPSC Line - Reported (310)	0.0018886	0.0155	0.000975683	0.2415	0.00143214	1.80967
3D Estimated Tissue Cell Density (10^6 cells/mL) (120)	Disease Modelling - Arrhythmogenic Cardiomyopathy (10)	0.00187972	0.1975	0.00112747	0.57	0.0015036	0.704433
3D Estimated Tissue Cell Density (10^6 cells/mL) (120)	Sex of hiPSC Lines - Female (42)	0.00187903	0.951	0.00144229	0.9825	0.00166066	0.0218195
3D Estimated Tissue Cell Density (10^6 cells/mL) (120)	Wnt Inhibition Duration - 4 days (19)	0.00187638	0.3535	0.00108427	0.807	0.00148033	0.451611
3D Estimated Tissue Cell Density (10^6 cells/mL) (120)	3D Tissue Media - EGM2 (6)	0.00187477	0.3295	0.00231981	0.23	0.00209729	0.638272
3D Estimated Tissue Cell Density (10^6 cells/mL) (120)	Conduction Velocity (cm/s) - Reported (14)	0.00187414	0.429	0.00136499	0.7095	0.00161957	0.367543
3D Estimated Tissue Cell Density (10^6 cells/mL) (120)	Metabolic Analysis Method - Specialised (8)	0.00185718	0.2105	0.000843823	0.734	0.0013505	0.676748
3D Estimated Tissue Cell Density (10^6 cells/mL) (120)	hiPSC-CM Maintenance/Maturation Media (if different) - DMEM/F12 (6)	0.00184327	0.001	0.00111499	0.014	0.00147913	3
3D Estimated Tissue Cell Density (10^6 cells/mL) (120)	Upstroke Velocity (um/s) - Q2 (10)	0.00172853	0.1945	0.00193858	0.1965	0.00183355	0.71108
3D Estimated Tissue Cell Density (10^6 cells/mL) (120)	Beat Rate (beats per minute) - Q4 (13)	0.00169959	0.38	0.0012385	0.6205	0.00146905	0.420216
3D Estimated Tissue Cell Density (10^6 cells/mL) (120)	Pharmacological Interventions - E4031 (22)	0.00164928	0.8385	0.00134096	0.9135	0.00149512	0.0764969
3D Estimated Tissue Cell Density (10^6 cells/mL) (120)	Upstroke Velocity (um/s) - Q4 (9)	0.00164636	0.4765	0.00266755	0.194	0.00215695	0.712198
3D Estimated Tissue Cell Density (10^6 cells/mL) (120)	Metabolic Analysis Method - Seahorse (35)	0.00164456	0.9045	0.00304521	0.532	0.00234488	0.274088
3D Estimated Tissue Cell Density (10^6 cells/mL) (120)	Time to Peak (ms) - Q2 (10)	0.00164427	0.633	0.000724793	0.9625	0.00118453	0.198596
3D Estimated Tissue Cell Density (10^6 cells/mL) (120)	Measured Fatty Acid Metabolism (18)	0.00162206	0.481	0.00193437	0.434	0.00177822	0.36251
3D Estimated Tissue Cell Density (10^6 cells/mL) (120)	Differentiation Purity % - 75 to 79 (8)	0.00159073	0.3885	0.00153197	0.4585	0.00156135	0.410609
3D Estimated Tissue Cell Density (10^6 cells/mL) (120)	AP Conduction Velocity (cm/s) - Q4 (7)	0.0015886	0.2595	0.000592131	0.872	0.00109036	0.585863
3D Estimated Tissue Cell Density (10^6 cells/mL) (120)	hiPSC Line - IMR90 (19)	0.00158796	0.596	0.00201217	0.442	0.00180007	0.354578
3D Estimated Tissue Cell Density (10^6 cells/mL) (120)	Scanning Electron Microscopy (21)	0.00157086	0.552	0.00277212	0.183	0.00217149	0.737549
3D Estimated Tissue Cell Density (10^6 cells/mL) (120)	Induction Conditions - Specialised (5)	0.00156971	0.0615	0.00124343	0.176	0.00140657	1.21112
3D Estimated Tissue Cell Density (10^6 cells/mL) (120)	hiPSC Line - PGP1 (11)	0.00156899	0.4035	0.00306876	0.085	0.00231887	1.07058
3D Estimated Tissue Cell Density (10^6 cells/mL) (120)	hiPSC-CM Backbone Media - Reported (301)	0.00152938	0.3985	0.00176473	0.3775	0.00164706	0.423083
3D Estimated Tissue Cell Density (10^6 cells/mL) (120)	Differentiation Purity % - 85 to 89 (24)	0.00152058	0.8925	0.00215806	0.746	0.00183932	0.127261
3D Estimated Tissue Cell Density (10^6 cells/mL) (120)	hiPSC-CM Media Supplement - Albumin (23)	0.00150942	0.9525	0.00156033	0.9555	0.00153488	0.021135
3D Estimated Tissue Cell Density (10^6 cells/mL) (120)	Metabolic Maturation Strategy (Broad) - Known (30)	0.00150555	0.668	0.00113984	0.879	0.0013227	0.175224
3D Estimated Tissue Cell Density (10^6 cells/mL) (120)	2D Surface - ECM-coated (114)	0.00149449	0.9605	0.00322342	0.472	0.00235895	0.326058
3D Estimated Tissue Cell Density (10^6 cells/mL) (120)	Sex of hiPSC Lines - Both (10)	0.00148693	0.7395	0.00214125	0.504	0.00181409	0.297569
3D Estimated Tissue Cell Density (10^6 cells/mL) (120)	Max Capture Rate (Hz) - Reported (15)	0.00147019	0.9375	0.00278185	0.606	0.00212602	0.217527
3D Estimated Tissue Cell Density (10^6 cells/mL) (120)	Conduction Velocity (cm/s) Quantiles (14)	0.0014695	0.6595	0.0016041	0.642	0.0015368	0.192465
3D Estimated Tissue Cell Density (10^6 cells/mL) (120)	Disease Modelling - Myocardium (11)	0.00143491	0.8325	0.00178429	0.7585	0.0016096	0.120044
3D Estimated Tissue Cell Density (10^6 cells/mL) (120)	2D Surface - Micropatterned (24)	0.0014169	0.35	0.00112678	0.5785	0.00127184	0.455932
3D Estimated Tissue Cell Density (10^6 cells/mL) (120)	AP Amplitude (mV) Quantiles (40)	0.00140636	0.992	0.000976437	0.999	0.0011914	0.00348833
3D Estimated Tissue Cell Density (10^6 cells/mL) (120)	hiPSC-CM Media Supplement - Lipid Mix (5)	0.00139838	0.5555	0.0020476	0.316	0.00172299	0.500313
3D Estimated Tissue Cell Density (10^6 cells/mL) (120)	3D Platform - Nanotechnology (3)	0.00139455	0.2305	0.000204722	0.932	0.000799634	0.637329
3D Estimated Tissue Cell Density (10^6 cells/mL) (120)	Disease Modelling - Genetic Disorders (23)	0.00138735	0.8505	0.00220335	0.5625	0.00179535	0.249877
3D Estimated Tissue Cell Density (10^6 cells/mL) (120)	Metabolic Maturation Strategy (Broad) - Hormonal Stimulation (15)	0.0013744	0.5095	0.00135224	0.598	0.00136332	0.292856
3D Estimated Tissue Cell Density (10^6 cells/mL) (120)	3D Platform - Gelatin (6)	0.00136261	0.5125	0.00125717	0.6495	0.00130989	0.290306
3D Estimated Tissue Cell Density (10^6 cells/mL) (120)	Metabolic Maturation Strategy (Broad) - Metabolic Modulation (19)	0.00136072	0.3845	0.000787312	0.796	0.00107401	0.415104
3D Estimated Tissue Cell Density (10^6 cells/mL) (120)	Electrophysiology Analysis Method - Motion-Contrast Reconstruction (4)	0.00127709	0.405	0.00156495	0.348	0.00142102	0.458421
3D Estimated Tissue Cell Density (10^6 cells/mL) (120)	Disease Modelling - Left Ventricular (15)	0.00127198	0.6885	0.00224172	0.3305	0.00175685	0.480829
3D Estimated Tissue Cell Density (10^6 cells/mL) (120)	Wnt Inhibitor - Wnt-C59 (28)	0.00124966	0.9575	0.00203582	0.8015	0.00164274	0.0960965
3D Estimated Tissue Cell Density (10^6 cells/mL) (120)	hiPSC-CM Media Supplement - Transferrin (11)	0.00121437	0.7735	0.00113238	0.872	0.00117338	0.11154
3D Estimated Tissue Cell Density (10^6 cells/mL) (120)	3D Tissue Media - iCell Maintenance Medium (12)	0.00120824	0.8245	0.00180359	0.658	0.00150592	0.181774
3D Estimated Tissue Cell Density (10^6 cells/mL) (120)	Beat Rate (beats per minute) - Q2 (16)	0.00119329	0.61	0.000550611	0.927	0.000871951	0.21467
3D Estimated Tissue Cell Density (10^6 cells/mL) (120)	Pharmacological Interventions - Doxorubicin (17)	0.00116817	0.944	0.00124668	0.942	0.00120742	0.0259491
3D Estimated Tissue Cell Density (10^6 cells/mL) (120)	hiPSC-CM Media Supplement - Nonessential Amino Acids (7)	0.00116386	0.106	0.000798059	0.3775	0.000980959	0.974694
3D Estimated Tissue Cell Density (10^6 cells/mL) (120)	Time to Relaxation (ms) - Reported (10)	0.00115424	0.8795	0.00180667	0.672	0.00148045	0.172631
3D Estimated Tissue Cell Density (10^6 cells/mL) (120)	hiPSC-CM Media Supplement - HEPES (16)	0.00115101	0.948	0.00175577	0.8205	0.00145339	0.0859214
3D Estimated Tissue Cell Density (10^6 cells/mL) (120)	Disease Modelling - Arrhythmic (15)	0.00113597	0.714	0.00132569	0.69	0.00123083	0.161151
3D Estimated Tissue Cell Density (10^6 cells/mL) (120)	Stress (mN/mm2) - Q1 (10)	0.00111511	0.906	0.00106848	0.9405	0.0010918	0.0428718
3D Estimated Tissue Cell Density (10^6 cells/mL) (120)	Force (mN) - Q4 (12)	0.00111346	0.898	0.00260254	0.3775	0.001858	0.423083
3D Estimated Tissue Cell Density (10^6 cells/mL) (120)	Induction Conditions - Wnt3a (3)	0.0010983	0.4055	0.0013945	0.3525	0.0012464	0.452841
3D Estimated Tissue Cell Density (10^6 cells/mL) (120)	Conduction Velocity (cm/s) - Q1 (7)	0.00108587	0.532	0.000924656	0.665	0.00100526	0.274088
3D Estimated Tissue Cell Density (10^6 cells/mL) (120)	Purification Duration - <3 days (17)	0.00107025	0.91	0.00146121	0.8335	0.00126573	0.0790944
3D Estimated Tissue Cell Density (10^6 cells/mL) (120)	Purification Duration - 7 days (6)	0.00104996	0.361	0.00142298	0.245	0.00123647	0.610834
3D Estimated Tissue Cell Density (10^6 cells/mL) (120)	hiPSC-CM Matrix Coating if Replated - Fibronectin (32)	0.00104833	0.924	0.00134664	0.876	0.00119749	0.0574959
3D Estimated Tissue Cell Density (10^6 cells/mL) (120)	3D % Confluency - 85 to 89 (12)	0.00104429	0.5525	0.00179002	0.284	0.00141715	0.546682
3D Estimated Tissue Cell Density (10^6 cells/mL) (120)	Time to Peak (ms) - Q3 (10)	0.00103617	0.674	0.00106726	0.733	0.00105172	0.17134
3D Estimated Tissue Cell Density (10^6 cells/mL) (120)	Beat Rate (beats per minute) - Q3 (10)	0.00100968	0.6765	0.000355102	0.9745	0.00068239	0.169732
3D Estimated Tissue Cell Density (10^6 cells/mL) (120)	hiPSC-CM Media Supplement - Selenium (7)	0.000998005	0.747	0.00119346	0.6995	0.00109573	0.155212
3D Estimated Tissue Cell Density (10^6 cells/mL) (120)	hiPSC-CM Maintenance/Maturation Media (if different) - Reported (51)	0.00098971	0.9995	0.00331834	0.643	0.00215403	0.191789
3D Estimated Tissue Cell Density (10^6 cells/mL) (120)	hiPSC-CM Media Supplement - Mercaptoethanol (10)	0.000960472	0.39	0.000728044	0.6185	0.000844258	0.408935
3D Estimated Tissue Cell Density (10^6 cells/mL) (120)	AP Amplitude (mV) - Q1 (11)	0.000940197	0.564	2.68753e-05	0.99	0.000483536	0.248721
3D Estimated Tissue Cell Density (10^6 cells/mL) (120)	Purification Duration - >9 days (5)	0.000925369	0.1965	0.00118519	0.184	0.00105528	0.735182
3D Estimated Tissue Cell Density (10^6 cells/mL) (120)	hiPSC-CM Media Supplement - GlutaMax (8)	0.000913528	0.371	0.00105916	0.4035	0.000986345	0.430626
3D Estimated Tissue Cell Density (10^6 cells/mL) (120)	Differentiation Purity % - 60 to 69 (5)	0.000905068	0.5645	0.00192016	0.185	0.00141261	0.732828
3D Estimated Tissue Cell Density (10^6 cells/mL) (120)	Max Capture Rate (Hz) - Q2 (7)	0.000897975	0.8745	0.00058002	0.968	0.000738997	0.0582402
3D Estimated Tissue Cell Density (10^6 cells/mL) (120)	Differentiation Purity Assessment - Visual Inspection (4)	0.000891793	0.496	0.00138286	0.2895	0.00113733	0.538351
3D Estimated Tissue Cell Density (10^6 cells/mL) (120)	Metabolic Maturation Strategy - Dexamethasone (7)	0.000859394	0.237	0.000590827	0.535	0.00072511	0.625252
3D Estimated Tissue Cell Density (10^6 cells/mL) (120)	Pharmacological Interventions - Carbenoxolone (4)	0.00083102	0.234	0.00209645	0.016	0.00146374	1.79588
3D Estimated Tissue Cell Density (10^6 cells/mL) (120)	Number of hiPSC Lines - >5 (8)	0.000821981	0.4825	0.000838267	0.584	0.000830124	0.316503
3D Estimated Tissue Cell Density (10^6 cells/mL) (120)	Pharmacological Interventions - Epinephrine (10)	0.000807834	0.7635	0.000628582	0.897	0.000718208	0.117191
3D Estimated Tissue Cell Density (10^6 cells/mL) (120)	3D Stromal Cell Type - Specialised (11)	0.0008067	0.9595	0.00165283	0.778	0.00122976	0.10902
3D Estimated Tissue Cell Density (10^6 cells/mL) (120)	2D % Confluency - 95 to 100 (13)	0.000797714	0.5495	0.000176824	0.9575	0.000487269	0.260032
3D Estimated Tissue Cell Density (10^6 cells/mL) (120)	Sarcomere Length (um) Q1 <1.7 (19)	0.00078611	0.8945	0.000607857	0.95	0.000696984	0.0484197
3D Estimated Tissue Cell Density (10^6 cells/mL) (120)	Pharmacological Interventions - Verapamil (27)	0.000775944	0.996	0.00136215	0.961	0.00106905	0.0172766
3D Estimated Tissue Cell Density (10^6 cells/mL) (120)	Differentiation Purity Assessment - IHC cTnT (7)	0.000767056	0.312	0.000754906	0.414	0.000760981	0.505845
3D Estimated Tissue Cell Density (10^6 cells/mL) (120)	Metabolic Maturation Strategy (Broad) - Thyroid Hormones (14)	0.000760385	0.6985	0.000475685	0.911	0.000618035	0.155834
3D Estimated Tissue Cell Density (10^6 cells/mL) (120)	hiPSC-CM Media Supplement - Essential Lipids (6)	0.000760152	0.845	0.000437406	0.9615	0.000598779	0.0731433
3D Estimated Tissue Cell Density (10^6 cells/mL) (120)	2D % Confluency - 85 to 89 (31)	0.000758225	0.6875	0.00103842	0.5865	0.000898322	0.231732
3D Estimated Tissue Cell Density (10^6 cells/mL) (120)	Differentiation Purity % - <60 (9)	0.000753377	0.541	0.000846509	0.5545	0.000799943	0.266803
3D Estimated Tissue Cell Density (10^6 cells/mL) (120)	Wnt Inhibition Duration - 3 days (17)	0.000752233	0.9385	0.000875582	0.9305	0.000813908	0.0312836
3D Estimated Tissue Cell Density (10^6 cells/mL) (120)	Pharmacological Interventions - Lidocaine (7)	0.000729463	0.505	0.000686785	0.6925	0.000708124	0.296709
3D Estimated Tissue Cell Density (10^6 cells/mL) (120)	Wnt Inhibitor - KY02111 (7)	0.000716763	0.058	0.000427116	0.295	0.000571939	1.23657
3D Estimated Tissue Cell Density (10^6 cells/mL) (120)	Amplitude (F/F0) - Q1 (13)	0.000709203	0.9305	0.000794804	0.9545	0.000752004	0.0312836
3D Estimated Tissue Cell Density (10^6 cells/mL) (120)	hiPSC Line - 253G1 (10)	0.000684182	0.639	0.00105383	0.455	0.000869006	0.341989
3D Estimated Tissue Cell Density (10^6 cells/mL) (120)	Metabolic Maturation Strategy (Broad) - Fatty Acid and Lipids (19)	0.000680452	0.759	0.00112572	0.5205	0.000903085	0.283579
3D Estimated Tissue Cell Density (10^6 cells/mL) (120)	AP Conduction Velocity (cm/s) - Q3 (6)	0.000679699	0.391	0.000208154	0.8015	0.000443926	0.407823
3D Estimated Tissue Cell Density (10^6 cells/mL) (120)	Disease Modelling - HCM (6)	0.000669955	0.352	0.000742474	0.375	0.000706214	0.453457
3D Estimated Tissue Cell Density (10^6 cells/mL) (120)	Amplitude (F/F0) - Q3 (12)	0.000659531	0.7495	0.00152478	0.3365	0.00109216	0.473015
3D Estimated Tissue Cell Density (10^6 cells/mL) (120)	Purification Duration - 3 days (12)	0.000648935	0.8695	0.000635466	0.9005	0.0006422	0.0607304
3D Estimated Tissue Cell Density (10^6 cells/mL) (120)	Differentiation Purity Assessment - Flow Cytometry cTnI+ (3)	0.000629052	0.363	0.000119073	0.8905	0.000374063	0.440093
3D Estimated Tissue Cell Density (10^6 cells/mL) (120)	Upstroke Velocity (um/s) - Q1 (10)	0.000629036	0.3765	0.00102365	0.2005	0.000826345	0.697886
3D Estimated Tissue Cell Density (10^6 cells/mL) (120)	Conduction Velocity (cm/s) - Q2 (7)	0.000616569	0.3735	0.00099102	0.265	0.000803794	0.576754
3D Estimated Tissue Cell Density (10^6 cells/mL) (120)	AP Conduction Velocity (cm/s) - Q2 (8)	0.000615835	0.368	0.000642992	0.4795	0.000629414	0.434152
3D Estimated Tissue Cell Density (10^6 cells/mL) (120)	3D Stromal Cell Type - hFF (6)	0.000599385	0.943	0.000265243	0.993	0.000432314	0.0254883
3D Estimated Tissue Cell Density (10^6 cells/mL) (120)	hiPSC-CM Media Supplement - VEGF (4)	0.000597964	0.1715	0.000812955	0.0665	0.000705459	1.17718
3D Estimated Tissue Cell Density (10^6 cells/mL) (120)	Wnt Inhibitor - VEGF (3)	0.000566983	0.1655	0.000360236	0.3995	0.00046361	0.781202
3D Estimated Tissue Cell Density (10^6 cells/mL) (120)	AP Amplitude (mV) - Q3 (9)	0.000562044	0.952	0.000568561	0.9665	0.000565303	0.0213631
3D Estimated Tissue Cell Density (10^6 cells/mL) (120)	Wnt Inhibition Duration - 1 day (12)	0.00055506	0.6805	0.00114836	0.376	0.000851709	0.424812
3D Estimated Tissue Cell Density (10^6 cells/mL) (120)	Purification Duration - 5 days (6)	0.000534046	0.47	0.000876628	0.3425	0.000705337	0.465339
3D Estimated Tissue Cell Density (10^6 cells/mL) (120)	T-tubules Observed (18)	0.000531034	0.9915	0.000655851	0.991	0.000593442	0.00392635
3D Estimated Tissue Cell Density (10^6 cells/mL) (120)	Pharmacological Interventions - Cisapride (5)	0.000504846	0.452	0.00139712	0.1005	0.000950983	0.997834
3D Estimated Tissue Cell Density (10^6 cells/mL) (120)	hiPSC-CM Media Supplement - bFGF (3)	0.000496334	0.241	0.000832054	0.063	0.000664194	1.20066
3D Estimated Tissue Cell Density (10^6 cells/mL) (120)	Number of hiPSC Lines - 4 (10)	0.000492522	0.966	0.00128957	0.7385	0.000891044	0.13165
3D Estimated Tissue Cell Density (10^6 cells/mL) (120)	3D CM % Composition - Reported (150)	0.000492205	0.569	0.00035194	0.752	0.000422073	0.244888
3D Estimated Tissue Cell Density (10^6 cells/mL) (120)	Metabolic Maturation Strategy (Broad) - Growth Factors (4)	0.00049117	0.784	0.000721191	0.636	0.00060618	0.196543
3D Estimated Tissue Cell Density (10^6 cells/mL) (120)	Electrophysiology Analysis Method - Genetical (3)	0.000475992	0.2545	0	0.7485	0.000475992	0.594312
3D Estimated Tissue Cell Density (10^6 cells/mL) (120)	Pharmacological Interventions - Propranolol (5)	0.000475799	0.546	0.00141705	0.089	0.000946425	1.05061
3D Estimated Tissue Cell Density (10^6 cells/mL) (120)	Time to Relaxation (ms) - Q1 (5)	0.000473741	0.955	0.00162784	0.4885	0.00105079	0.311135
3D Estimated Tissue Cell Density (10^6 cells/mL) (120)	3D Platform - Reported (154)	0.000471984	0.212	0.000649186	0.1385	0.000560585	0.85855
3D Estimated Tissue Cell Density (10^6 cells/mL) (120)	hiPSC Backbone Media - StemFlex (5)	0.000461711	0.524	0.000438417	0.625	0.000450064	0.280669
3D Estimated Tissue Cell Density (10^6 cells/mL) (120)	Disease Modelling - Specialised (3)	0.000461578	0.54	0.000641935	0.4445	0.000551757	0.352128
3D Estimated Tissue Cell Density (10^6 cells/mL) (120)	3D Stromal Cell Type - hiPSC-MC (3)	0.000445943	0.766	0.00189382	0.138	0.00116988	0.860121
3D Estimated Tissue Cell Density (10^6 cells/mL) (120)	hiPSC-CM Media Supplement - Reported (275)	0.000445341	0.9985	0.000697392	0.9955	0.000571366	0.00195874
3D Estimated Tissue Cell Density (10^6 cells/mL) (120)	Metabolic Maturation Strategy - Palmitic Acid (10)	0.000442527	0.558	0.000113463	0.894	0.000277995	0.253366
3D Estimated Tissue Cell Density (10^6 cells/mL) (120)	Time to Relaxation (ms) - Q2 (5)	0.000418612	0.755	0	0.975	0.000418612	0.122053
3D Estimated Tissue Cell Density (10^6 cells/mL) (120)	Metabolic Maturation Strategy (Broad) - Glucocorticoids (7)	0.000414758	0.5435	0.000469218	0.6195	0.000441988	0.2648
3D Estimated Tissue Cell Density (10^6 cells/mL) (120)	hiPSC Backbone Media - DMEM (10)	0.000412116	0.925	0.000554264	0.936	0.00048319	0.0338583
3D Estimated Tissue Cell Density (10^6 cells/mL) (120)	Metabolic Maturation Strategy - Specialised (9)	0.00040661	0.5265	1.25733e-05	0.915	0.000209592	0.278602
3D Estimated Tissue Cell Density (10^6 cells/mL) (120)	Time to Peak (ms) - Q1 (11)	0.000402699	0.9725	0.00116947	0.8065	0.000786082	0.0933956
3D Estimated Tissue Cell Density (10^6 cells/mL) (120)	Metabolic Maturation Strategy - Reported (30)	0.000397049	0.991	0.000791096	0.9515	0.000594072	0.0215912
3D Estimated Tissue Cell Density (10^6 cells/mL) (120)	Wnt Inhibitor - Others (9)	0.000397039	0.8155	0.00145067	0.199	0.000923856	0.701147
3D Estimated Tissue Cell Density (10^6 cells/mL) (120)	3D Tissue Media - MEM-α (6)	0.000395839	0.8265	0	0.975	0.000395839	0.0827571
3D Estimated Tissue Cell Density (10^6 cells/mL) (120)	hiPSC-CM Backbone Media - IMDM/E8/BPEL/APEL (8)	0.000384789	0.819	5.7394e-05	0.977	0.000221091	0.0867161
3D Estimated Tissue Cell Density (10^6 cells/mL) (120)	Metabolic Maturation Strategy - Vitamin B12 (3)	0.000372279	0.312	0	0.7285	0.000372279	0.505845
3D Estimated Tissue Cell Density (10^6 cells/mL) (120)	Differentiation Purity % - 70 to 74 (10)	0.000360359	0.9395	0.00141705	0.3895	0.000888704	0.409493
3D Estimated Tissue Cell Density (10^6 cells/mL) (120)	hiPSC Backbone Media - Conditioned (12)	0.000354519	0.98	0.000802861	0.9015	0.00057869	0.0450343
3D Estimated Tissue Cell Density (10^6 cells/mL) (120)	Gene Analysis Method - Specialised (6)	0.000351567	0.3185	0.000890788	0.061	0.000621177	1.21467
3D Estimated Tissue Cell Density (10^6 cells/mL) (120)	AP Amplitude (mV) - Reported(40)	0.000338415	1	0.000741328	0.994	0.000539872	0.00261362
3D Estimated Tissue Cell Density (10^6 cells/mL) (120)	hiPSC Line - iCell2 (8)	0.000325603	0.9165	0.000422794	0.9075	0.000374198	0.0421534
3D Estimated Tissue Cell Density (10^6 cells/mL) (120)	Induction Duration - 5 days (8)	0.000324929	0.648	0.000691014	0.458	0.000507972	0.339135
3D Estimated Tissue Cell Density (10^6 cells/mL) (120)	Time to Relaxation (ms) Quantiles (10)	0.00032352	0.9995	0.00181019	0.8035	0.00106686	0.0950141
3D Estimated Tissue Cell Density (10^6 cells/mL) (120)	3D Tissue Media - Specialised (4)	0.000318701	0.661	0.000130973	0.909	0.000224837	0.179799
3D Estimated Tissue Cell Density (10^6 cells/mL) (120)	Differentiation Purity Assessment - IHC a-actinin (8)	0.000316033	0.302	0.000160236	0.692	0.000238135	0.519993
3D Estimated Tissue Cell Density (10^6 cells/mL) (120)	Wnt Inhibitor - BMP4 (7)	0.000311148	0.628	6.28667e-05	0.9205	0.000187007	0.20204
3D Estimated Tissue Cell Density (10^6 cells/mL) (120)	Pharmacological Interventions - Metoprolol (5)	0.000309597	0.3305	0.000738066	0.1105	0.000523831	0.956638
3D Estimated Tissue Cell Density (10^6 cells/mL) (120)	Disease Modelling - Metabolic Disorders (4)	0.00030792	0.328	0.00047629	0.3125	0.000392105	0.50515
3D Estimated Tissue Cell Density (10^6 cells/mL) (120)	Differentiation Purity Assessment - Flow Cytometry VCAM1+ (4)	0.000293754	0.8825	0	0.982	0.000293754	0.0542853
3D Estimated Tissue Cell Density (10^6 cells/mL) (120)	3D Tissue Media - StemPro-34 (4)	0.000290573	0.7615	0.000549742	0.5645	0.000420158	0.248336
3D Estimated Tissue Cell Density (10^6 cells/mL) (120)	Disease Modelling - Long QT Syndrome (3)	0.000277931	0.724	0.000237943	0.785	0.000257937	0.140261
3D Estimated Tissue Cell Density (10^6 cells/mL) (120)	3D Endothelial Cell Type - CMVEC (5)	0.000273999	0.981	0.000266654	0.9865	0.000270326	0.00833099
3D Estimated Tissue Cell Density (10^6 cells/mL) (120)	Disease Modelling - Acute Myocardial Infarction (4)	0.000269678	0.9445	0.0015484	0.324	0.00090904	0.489455
3D Estimated Tissue Cell Density (10^6 cells/mL) (120)	Metabolic Maturation Strategy - Creatine (3)	0.000268502	0.4455	0	0.7345	0.000268502	0.351152
3D Estimated Tissue Cell Density (10^6 cells/mL) (120)	Metabolic Maturation Strategy - KOSR (3)	0.000261736	0.456	0.000652577	0.1545	0.000457157	0.811072
3D Estimated Tissue Cell Density (10^6 cells/mL) (120)	Pharmacological Interventions - Blebbistatin (5)	0.00025253	0.9125	0.00101621	0.458	0.000634372	0.339135
3D Estimated Tissue Cell Density (10^6 cells/mL) (120)	hiPSC-CM Media Supplement - Polyvinylalchohol (6)	0.000247764	0.9805	0.000440768	0.9545	0.000344266	0.0202241
3D Estimated Tissue Cell Density (10^6 cells/mL) (120)	Differentiation Purity Assessment - Flow Cytometry a-actinin+ (9)	0.000238723	0.869	0.000601548	0.6775	0.000420136	0.169091
3D Estimated Tissue Cell Density (10^6 cells/mL) (120)	Pharmacological Interventions - Specialised (16)	0.000235273	0.8995	0.000643073	0.6985	0.000439173	0.155834
3D Estimated Tissue Cell Density (10^6 cells/mL) (120)	hiPSC-CM Backbone Media - Commercial Cardiomyocyte Kit (12)	0.000228909	0.7425	6.29855e-05	0.926	0.000145947	0.129304
3D Estimated Tissue Cell Density (10^6 cells/mL) (120)	Metabolic Maturation Strategy - L-carnitine (6)	0.000211675	0.426	0.000190427	0.6675	0.000201051	0.37059
3D Estimated Tissue Cell Density (10^6 cells/mL) (120)	Disease Modelling - Fibrotic (3)	0.000209214	0.8925	0.000543995	0.7675	0.000376605	0.114922
3D Estimated Tissue Cell Density (10^6 cells/mL) (120)	Wnt Inhibition Duration - 6 days (4)	0.0002061	0.4605	0	0.743	0.0002061	0.33677
3D Estimated Tissue Cell Density (10^6 cells/mL) (120)	3D % Confluency - 90 to 94 (11)	0.00019202	0.8285	0	0.926	0.00019202	0.0817075
3D Estimated Tissue Cell Density (10^6 cells/mL) (120)	Wnt Inhibitor - bFGF (8)	0.000190479	0.8525	0.000653715	0.4905	0.000422097	0.309361
3D Estimated Tissue Cell Density (10^6 cells/mL) (120)	hiPSC Backbone Media - StemFit (5)	0.000186286	0.923	0.000348253	0.8715	0.000267269	0.0597326
3D Estimated Tissue Cell Density (10^6 cells/mL) (120)	Pharmacological Interventions - Phenylephrine (3)	0.00017007	0.6085	0.000198403	0.707	0.000184236	0.215739
3D Estimated Tissue Cell Density (10^6 cells/mL) (120)	Metabolic Maturation Strategy - B27 (3)	0.000156698	0.5945	0	0.7455	0.000156698	0.225848
3D Estimated Tissue Cell Density (10^6 cells/mL) (120)	AP Conduction Velocity (cm/s) - Q1 (7)	0.000151638	0.9705	0.000310097	0.937	0.000230868	0.0282604
3D Estimated Tissue Cell Density (10^6 cells/mL) (120)	Disease Modelling - Ischemic/Infarction (7)	0.000148292	0.9745	0	0.994	0.000148292	0.0112182
3D Estimated Tissue Cell Density (10^6 cells/mL) (120)	Upstroke Velocity (um/s) - Q3 (11)	0.000146487	0.9855	0.000417209	0.964	0.000281848	0.015923
3D Estimated Tissue Cell Density (10^6 cells/mL) (120)	hiPSC Line - Cor.4U (16)	0.000144845	0.9785	0.000829215	0.7435	0.00048703	0.128719
3D Estimated Tissue Cell Density (10^6 cells/mL) (120)	Resting Membrane Potential (mV) - Q4 (9)	0.000141531	0.988	0.000148274	0.998	0.000144902	0.00524306
3D Estimated Tissue Cell Density (10^6 cells/mL) (120)	3D SC % Composition - Reported (150)	0.000134369	0.831	0.000266017	0.799	0.000200193	0.0974532
3D Estimated Tissue Cell Density (10^6 cells/mL) (120)	Resting Membrane Potential (mV) - Q3 (11)	0.00012182	0.973	0.000250526	0.962	0.000186173	0.0168249
3D Estimated Tissue Cell Density (10^6 cells/mL) (120)	Purification Stategy - Cell Sorting (7)	0.000105581	0.825	2.67913e-05	0.9155	6.61863e-05	0.0835461
3D Estimated Tissue Cell Density (10^6 cells/mL) (120)	Number of hiPSC Lines - Reported (313)	0.000105544	0.584	0.000691949	0.148	0.000398746	0.829738
3D Estimated Tissue Cell Density (10^6 cells/mL) (120)	Metabolic Maturation Strategy - IGF-1 (3)	0.000105418	0.83	0.00062351	0.4935	0.000364464	0.306713
3D Estimated Tissue Cell Density (10^6 cells/mL) (120)	Metabolic Maturation Strategy - Taurine (3)	6.54773e-05	0.6815	0.000191538	0.722	0.000128508	0.166534
3D Estimated Tissue Cell Density (10^6 cells/mL) (120)	3D Stromal Cell Type - hDF (7)	3.99639e-05	0.999	0.00134177	0.791	0.000690867	0.101824
3D Estimated Tissue Cell Density (10^6 cells/mL) (120)	Amplitude (F/F0) - Q4 (12)	3.26104e-05	0.984	0.000134088	0.986	8.3349e-05	0.0070049
3D Estimated Tissue Cell Density (10^6 cells/mL) (120)	3D % Confluency - 95 to 100 (15)	2.10017e-05	0.961	0.000748211	0.64	0.000384607	0.19382
3D Estimated Tissue Cell Density (10^6 cells/mL) (120)	hiPSC-CM Matrix Coating if Replated - Specialised (8)	1.94337e-05	0.6805	0.000386591	0.381	0.000203012	0.419075
3D Estimated Tissue Cell Density (10^6 cells/mL) (120)	hiPSC-CM Maintenance/Maturation Media (if different) - Specialised (8)	0	0.6475	3.56506e-05	0.706	3.56506e-05	0.18876
3D Estimated Tissue Cell Density (10^6 cells/mL) (120)	AP Amplitude (mV) - Q2 (10)	0	0.878	0.000130919	0.893	0.000130919	0.0565055
3D Estimated Tissue Cell Density (10^6 cells/mL) (120)	Metabolic Maturation Strategy (Broad) - Signaling Pathway Regulators (6)	0	0.6785	0.00013939	0.6795	0.00013939	0.16845
3D Estimated Tissue Cell Density (10^6 cells/mL) (120)	Metabolic Maturation Strategy (Broad) - Specialised (4)	0	0.6615	0.000152902	0.6795	0.000152902	0.17947
3D Estimated Tissue Cell Density (10^6 cells/mL) (120)	Metabolic Maturation Strategy - Linoleic/Oleic Acid (4)	0	0.6855	0.000153306	0.6815	0.000153306	0.166534
3D Estimated Tissue Cell Density (10^6 cells/mL) (120)	AP Amplitude (mV) - Q4 (10)	0	0.6955	0.000160714	0.7135	0.000160714	0.157703
3D Estimated Tissue Cell Density (10^6 cells/mL) (120)	hiPSC-CM Media Supplement - Specialised (13)	0	0.686	0.000170612	0.712	0.000170612	0.163676
3D Estimated Tissue Cell Density (10^6 cells/mL) (120)	Contractile Analysis Method - TFM (8)	0	0.887	0.000187376	0.9035	0.000187376	0.0520764
3D Estimated Tissue Cell Density (10^6 cells/mL) (120)	2D Surface - Hydrogel (14)	0	0.667	0.000193513	0.7025	0.000193513	0.175874
3D Estimated Tissue Cell Density (10^6 cells/mL) (120)	3D Endothelial Cell Type - Specialised (3)	0	0.679	0.000194324	0.686	0.000194324	0.16813
3D Estimated Tissue Cell Density (10^6 cells/mL) (120)	Purification Duration - 8 days (4)	0	0.6895	0.000201554	0.522	0.000201554	0.282329
3D Estimated Tissue Cell Density (10^6 cells/mL) (120)	hiPSC-CM Matrix Coating if Replated - Geltrex (10)	0	0.9875	0.000207747	0.968	0.000207747	0.0141246
3D Estimated Tissue Cell Density (10^6 cells/mL) (120)	2D Surface - Decellularized ECM (3)	0	0.663	0.00020903	0.515	0.00020903	0.288193
3D Estimated Tissue Cell Density (10^6 cells/mL) (120)	hiPSC-CM Maintenance/Maturation Media (if different) - Modified Essential Medium (1)	0	0.6945	0.000227605	0.52	0.000227605	0.283997
3D Estimated Tissue Cell Density (10^6 cells/mL) (120)	Metabolic Maturation Strategy - Ascorbic Acid (3)	0	0.686	0.000229789	0.5185	0.000229789	0.285251
3D Estimated Tissue Cell Density (10^6 cells/mL) (120)	hiPSC-CM Maintenance/Maturation Media (if different) - DMEM (11)	0	0.9575	0.000295143	0.9065	0.000295143	0.0426322
3D Estimated Tissue Cell Density (10^6 cells/mL) (120)	3D Stromal Cell Type - SMC (3)	0	0.8815	0.00035704	0.71	0.00035704	0.148742
3D Estimated Tissue Cell Density (10^6 cells/mL) (120)	3D EC % Composition - Reported (150)	0	0.8925	0.00044015	0.6325	0.00044015	0.198939
3D Estimated Tissue Cell Density (10^6 cells/mL) (120)	hiPSC Line - 201B6 (3)	0	0.961	0.000459857	0.81	0.000459857	0.091515
3D Estimated Tissue Cell Density (10^6 cells/mL) (120)	hiPSC Line - SCVI-273 (8)	0	0.9645	0.000469685	0.8275	0.000469685	0.082232
3D Estimated Tissue Cell Density (10^6 cells/mL) (120)	Metabolic Maturation Strategy (Broad) - Amino Acids and Derivatives (5)	0	0.689	0.000475147	0.336	0.000475147	0.473661
3D Estimated Tissue Cell Density (10^6 cells/mL) (120)	Resting Membrane Potential (mV) - Q1 (11)	0	0.961	0.000475437	0.8145	0.000475437	0.0891089
3D Estimated Tissue Cell Density (10^6 cells/mL) (120)	Pharmacological Interventions - Carbamylcholine (6)	0	0.9625	0.000607703	0.679	0.000607703	0.16813
3D Estimated Tissue Cell Density (10^6 cells/mL) (120)	Pharmacological Interventions - Ranolazine (6)	0	0.6785	0.000622822	0.146	0.000622822	0.835647
3D Estimated Tissue Cell Density (10^6 cells/mL) (120)	Purification Stategy - Media (6)	0	0.989	0.000940013	0.6535	0.000940013	0.184754
3D Estimated Tissue Cell Density (10^6 cells/mL) (120)	Disease Modelling - DCM (5)	0	0.8875	0.00155784	0.0675	0.00155784	1.1707
3D Estimated Tissue Size (mm2) (133)	3D Platform - Scaffold Free (43)	0.0429647	0	0.0377809	0	0.0403728	3.30103
3D Estimated Tissue Size (mm2) (133)	Tension Maturation (64)	0.0260692	0.0005	0.0219959	0.0015	0.0240325	3.30103
3D Estimated Tissue Size (mm2) (133)	3D Estimated Tissue Cell Density (10^6 cells/mL) Q3 >10.8 (40)	0.0223918	0	0.0235209	0	0.0229563	3.30103
3D Estimated Tissue Size (mm2) (133)	3D Platform - Fibrin (50)	0.0202353	0.001	0.0220542	0.0015	0.0211447	3
3D Estimated Tissue Size (mm2) (133)	3D Estimated Tissue Cell Density (10^6 cells/mL) Quantiles (120)	0.0192729	0.0565	0.0233001	0.0085	0.0212865	2.07058
3D Estimated Tissue Size (mm2) (133)	3D Estimated Tissue Cell Density (10^6 cells/mL) Q1 <2.82 (40)	0.0172098	0.0065	0.0139563	0.0125	0.015583	2.18709
3D Estimated Tissue Size (mm2) (133)	Other Cells Maturation (77)	0.0165627	0.0015	0.016689	0.0015	0.0166258	2.82391
3D Estimated Tissue Size (mm2) (133)	Contractile Analysis Method - Post Deflection (39)	0.0136784	0.014	0.0124233	0.0195	0.0130508	1.85387
3D Estimated Tissue Size (mm2) (133)	Force (mN) Quantiles (48)	0.0120487	0.151	0.00992193	0.31	0.0109853	0.821023
3D Estimated Tissue Size (mm2) (133)	3D Platform - Matrigel (32)	0.0102284	0.028	0.00749243	0.112	0.00886041	1.55284
3D Estimated Tissue Size (mm2) (133)	Force (mN) - Reported (48)	0.0102075	0.0605	0.01141	0.035	0.0108088	1.45593
3D Estimated Tissue Size (mm2) (133)	3D Tissue Media - DMEM (53)	0.0100149	0.051	0.00902866	0.0625	0.00952178	1.29243
3D Estimated Tissue Size (mm2) (133)	3D CM % Composition - >74 (115)	0.00900219	0.0605	0.00852323	0.067	0.00876271	1.21824
3D Estimated Tissue Size (mm2) (133)	Gene Analysis Method - Reported (167)	0.0089135	0.1065	0.00752861	0.1665	0.00822105	0.97265
3D Estimated Tissue Size (mm2) (133)	3D Estimated Tissue Cell Density (10^6 cells/mL) Q2 2.82 to 10.8 (40)	0.00873464	0.0735	0.00872467	0.059	0.00872966	1.22915
3D Estimated Tissue Size (mm2) (133)	Induction Duration - 1 days (99)	0.00863932	0.137	0.0104628	0.043	0.00955105	1.36653
3D Estimated Tissue Size (mm2) (133)	Insulin Addition - Induction (172)	0.00824972	0.163	0.00953968	0.0755	0.0088947	1.12205
3D Estimated Tissue Size (mm2) (133)	Induction Duration - 3 days (37)	0.0081048	0.0635	0.00597662	0.203	0.00704071	1.19723
3D Estimated Tissue Size (mm2) (133)	Stress (mN/mm2) - Reported (37)	0.00804641	0.073	0.0058729	0.2335	0.00695966	1.13668
3D Estimated Tissue Size (mm2) (133)	3D Stromal Cell Type - hCF (30)	0.0078664	0.122	0.00625788	0.256	0.00706214	0.91364
3D Estimated Tissue Size (mm2) (133)	Stress (mN/mm2) Quantiles (37)	0.00757003	0.428	0.00728875	0.4625	0.00742939	0.368556
3D Estimated Tissue Size (mm2) (133)	3D Platform - Collagen (37)	0.00746342	0.145	0.00747439	0.1335	0.00746891	0.874519
3D Estimated Tissue Size (mm2) (133)	3D Tissue Media - Reported (157)	0.00725424	0.1	0.00393665	0.5875	0.00559545	1
3D Estimated Tissue Size (mm2) (133)	2D % Confluency - Reported (236)	0.00724234	0.293	0.00612818	0.3945	0.00668526	0.533132
3D Estimated Tissue Size (mm2) (133)	3D SC % Composition - <25 (120)	0.0071706	0.2085	0.00686726	0.2005	0.00701893	0.697886
3D Estimated Tissue Size (mm2) (133)	Electrical Maturation (38)	0.00711169	0.082	0.00695327	0.083	0.00703248	1.08619
3D Estimated Tissue Size (mm2) (133)	3D Tissue Media - RPMI-1640 (71)	0.00694885	0.228	0.00718322	0.1785	0.00706603	0.748362
3D Estimated Tissue Size (mm2) (133)	hiPSC Backbone Media - Reported (228)	0.00694708	0.213	0.00547029	0.375	0.00620869	0.67162
3D Estimated Tissue Size (mm2) (133)	3D Stromal Cell Type - Reported (77)	0.00689091	0.322	0.00690499	0.2475	0.00689795	0.606425
3D Estimated Tissue Size (mm2) (133)	Induction Duration - 2 days (71)	0.00673082	0.145	0.00509062	0.331	0.00591072	0.838632
3D Estimated Tissue Size (mm2) (133)	3D % Confluency - Reported (239)	0.00666352	0.3795	0.00480442	0.664	0.00573397	0.420788
3D Estimated Tissue Size (mm2) (133)	Electrophysiology Analysis Method - Reported (117)	0.0065773	0.3845	0.00490747	0.616	0.00574239	0.415104
3D Estimated Tissue Size (mm2) (133)	Upstroke Velocity (um/s) Quantiles (40)	0.00655335	0.3825	0.00585274	0.531	0.00620305	0.417369
3D Estimated Tissue Size (mm2) (133)	hiPSC Backbone Media - Essential 8 (82)	0.00655073	0.2865	0.00558428	0.4025	0.00606751	0.542875
3D Estimated Tissue Size (mm2) (133)	Purification Stategy - Glucose & Lactate (85)	0.00649173	0.2975	0.00461028	0.6095	0.00555101	0.526513
3D Estimated Tissue Size (mm2) (133)	Contractile Analysis Method - Force Transducer (26)	0.00642065	0.053	0.00683859	0.042	0.00662962	1.37675
3D Estimated Tissue Size (mm2) (133)	hiPSC-CM Backbone Media - RPMI-1640 (161)	0.00635865	0.4005	0.00629506	0.3365	0.00632685	0.473015
3D Estimated Tissue Size (mm2) (133)	3D Platform - 3D printed (9)	0.00632407	0.027	0.00506669	0.0645	0.00569538	1.56864
3D Estimated Tissue Size (mm2) (133)	Pharmacological Interventions - Isoproterenol (70)	0.0063048	0.3145	0.0058834	0.3305	0.0060941	0.502379
3D Estimated Tissue Size (mm2) (133)	3D SC % Composition - >24 (30)	0.00629131	0.2965	0.0059641	0.31	0.0061277	0.527975
3D Estimated Tissue Size (mm2) (133)	Pharmacological Interventions - Reported (141)	0.00624465	0.443	0.00705188	0.2475	0.00664826	0.606425
3D Estimated Tissue Size (mm2) (133)	Calcium Handling Analysis Method - Dye (99)	0.00613703	0.3615	0.00581904	0.367	0.00597804	0.441892
3D Estimated Tissue Size (mm2) (133)	Wnt Inhibitor - Wnt-C59 (28)	0.00605277	0.0335	0.00539349	0.0595	0.00572313	1.47496
3D Estimated Tissue Size (mm2) (133)	Wnt Inhibitor - DS-I-7 (11)	0.00601071	0.032	0.00333452	0.2565	0.00467261	1.49485
3D Estimated Tissue Size (mm2) (133)	Differentiation Purity Assessment - Reported (167)	0.00596496	0.536	0.00415278	0.813	0.00505887	0.270835
3D Estimated Tissue Size (mm2) (133)	Contractile Analysis Method - Reported(163)	0.00596226	0.323	0.00819235	0.0905	0.00707731	1.04335
3D Estimated Tissue Size (mm2) (133)	Force (mN) - Q2 (12)	0.00586836	0.1115	0.00711734	0.051	0.00649285	1.29243
3D Estimated Tissue Size (mm2) (133)	Insulin Addition - Reported (175)	0.00584544	0.4775	0.00424915	0.746	0.0050473	0.321027
3D Estimated Tissue Size (mm2) (133)	Induction Conditions - Reported (238)	0.00581726	0.222	0.00665655	0.123	0.00623691	0.910095
3D Estimated Tissue Size (mm2) (133)	Sex of hiPSC Lines - Known (116)	0.00579074	0.5705	0.00607034	0.4105	0.00593054	0.386687
3D Estimated Tissue Size (mm2) (133)	Purification Stategy - Reported (101)	0.00577129	0.5025	0.00586144	0.4055	0.00581636	0.392009
3D Estimated Tissue Size (mm2) (133)	Insulin Addition - prior Day 8 (149)	0.00573813	0.6245	0.00375034	0.897	0.00474424	0.204468
3D Estimated Tissue Size (mm2) (133)	2D % Confluency - 2D/3D Values (154)	0.00571988	0.541	0.00630567	0.34	0.00601277	0.468521
3D Estimated Tissue Size (mm2) (133)	Contractile Analysis Method - Motion Tracking (88)	0.00568635	0.5165	0.00642829	0.3115	0.00605732	0.506542
3D Estimated Tissue Size (mm2) (133)	hiPSC Line - Specialised (121)	0.00555403	0.5315	0.00292734	0.939	0.00424069	0.274497
3D Estimated Tissue Size (mm2) (133)	Ancestry of hiPSC Lines - Known (71)	0.00533134	0.535	0.00873034	0.0855	0.00703084	1.06803
3D Estimated Tissue Size (mm2) (133)	Conduction Velocity (cm/s) Quantiles (14)	0.00526204	0.0285	0.00325611	0.205	0.00425908	1.54516
3D Estimated Tissue Size (mm2) (133)	Differentiation Purity Assessment - Flow Cytometry cTnT+ (134)	0.00518351	0.7155	0.00515991	0.594	0.00517171	0.226214
3D Estimated Tissue Size (mm2) (133)	hiPSC-CM Backbone Media - iCell Maintenance Medium (86)	0.00496323	0.4565	0.00285096	0.8865	0.00390709	0.340559
3D Estimated Tissue Size (mm2) (133)	Wnt Inhibition Duration - >6 days (12)	0.00491707	0.0755	0.00605289	0.0325	0.00548498	1.48812
3D Estimated Tissue Size (mm2) (133)	3D % Confluency - 2D/3D Values (154)	0.00486273	0.7555	0.00655625	0.3245	0.00570949	0.488785
3D Estimated Tissue Size (mm2) (133)	Transmission Electron Microscopy (62)	0.0048573	0.5815	0.00331037	0.846	0.00408384	0.23545
3D Estimated Tissue Size (mm2) (133)	Time to Peak (ms) Quantiles (41)	0.00485025	0.7425	0.00404941	0.887	0.00444983	0.129304
3D Estimated Tissue Size (mm2) (133)	2D Surface - ECM-coated (114)	0.00480593	0.268	0.0026842	0.776	0.00374507	0.571865
3D Estimated Tissue Size (mm2) (133)	Insulin Addition - after Day 7 (26)	0.00478438	0.2415	0.00487547	0.2135	0.00482993	0.670602
3D Estimated Tissue Size (mm2) (133)	Wnt Inhibitor - IWP (110)	0.00463258	0.7445	0.00397394	0.8115	0.00430326	0.128135
3D Estimated Tissue Size (mm2) (133)	3D Tissue Media - B27 (67)	0.00460648	0.7035	0.00433422	0.6885	0.00447035	0.162096
3D Estimated Tissue Size (mm2) (133)	hiPSC-CM Matrix Coating if Replated - Matrigel (64)	0.00457768	0.43	0.00659203	0.1235	0.00558485	0.908333
3D Estimated Tissue Size (mm2) (133)	Sarcomere Length (um) - Mature Q2 1.7 to 1.9 (28)	0.00452717	0.106	0.00370187	0.187	0.00411452	0.974694
3D Estimated Tissue Size (mm2) (133)	Pharmacological Interventions - Doxorubicin (17)	0.00441228	0.122	0.00435233	0.1215	0.00438231	0.915424
3D Estimated Tissue Size (mm2) (133)	Wnt Inhibitor - Reported (227)	0.00436293	0.641	0.00522532	0.353	0.00479412	0.452225
3D Estimated Tissue Size (mm2) (133)	CM Immunofluorescent Imaging (261)	0.00434501	0.318	0.00464616	0.257	0.00449559	0.590067
3D Estimated Tissue Size (mm2) (133)	Disease Modelling - Reported (50)	0.00408808	0.703	0.00281858	0.911	0.00345333	0.153045
3D Estimated Tissue Size (mm2) (133)	Gene Analysis Method - PCR (131)	0.00400429	0.8735	0.00715305	0.213	0.00557867	0.67162
3D Estimated Tissue Size (mm2) (133)	Wnt Inhibition Duration - 2 days (152)	0.00397007	0.9075	0.00201254	0.9965	0.00299131	0.0421534
3D Estimated Tissue Size (mm2) (133)	hiPSC-CM Media Supplement - Reported (275)	0.0039682	0.35	0.0039352	0.3305	0.0039517	0.480829
3D Estimated Tissue Size (mm2) (133)	Number of hiPSC Lines - 1 (218)	0.00395347	0.845	0.0026931	0.9645	0.00332329	0.0731433
3D Estimated Tissue Size (mm2) (133)	Electrophysiology Analysis Method - Optical Mapping (39)	0.00394642	0.5565	0.00457414	0.394	0.00426028	0.404504
3D Estimated Tissue Size (mm2) (133)	hiPSC Line - iCell (46)	0.0038568	0.518	0.00280507	0.776	0.00333093	0.28567
3D Estimated Tissue Size (mm2) (133)	3D CM % Composition - <75 (35)	0.00385431	0.643	0.00507414	0.312	0.00446423	0.505845
3D Estimated Tissue Size (mm2) (133)	Calcium Handling Analysis Method - Reported (124)	0.00385207	0.904	0.00225088	0.988	0.00305148	0.0438316
3D Estimated Tissue Size (mm2) (133)	AP Conduction Velocity (cm/s) Quantiles (28)	0.00384919	0.152	0.00368902	0.235	0.00376911	0.818156
3D Estimated Tissue Size (mm2) (133)	Purification Duration - 4 days (28)	0.0038353	0.529	0.00335769	0.6275	0.0035965	0.276544
3D Estimated Tissue Size (mm2) (133)	hiPSC-CM Matrix Coating if Replated - Reported (152)	0.00383263	0.898	0.00556248	0.501	0.00469756	0.300162
3D Estimated Tissue Size (mm2) (133)	Differentiation Purity % - 90 to 94 (37)	0.00378673	0.506	0.00311237	0.6405	0.00344955	0.295849
3D Estimated Tissue Size (mm2) (133)	hiPSC-CM Media Supplement - Albumin (23)	0.00376868	0.261	0.0058165	0.066	0.00479259	1.18046
3D Estimated Tissue Size (mm2) (133)	3D EC % Composition - >9 (30)	0.00375474	0.5995	0.00425713	0.4535	0.00400594	0.343423
3D Estimated Tissue Size (mm2) (133)	Purification Duration - Reported (88)	0.00373744	0.9135	0.00559834	0.502	0.00466789	0.299296
3D Estimated Tissue Size (mm2) (133)	Induction Conditions - CHIR99021 (174)	0.00371298	0.9285	0.0032574	0.9365	0.00348519	0.0322181
3D Estimated Tissue Size (mm2) (133)	hiPSC-CM Backbone Media - Reported (301)	0.00371078	0.009	0.00179914	0.2055	0.00275496	2.04576
3D Estimated Tissue Size (mm2) (133)	Time to Peak (ms) - Reported (41)	0.00366358	0.6	0.00368277	0.5865	0.00367317	0.231732
3D Estimated Tissue Size (mm2) (133)	Differentiation Purity % - Reported (153)	0.00362451	0.935	0.00244071	0.9865	0.00303261	0.0291884
3D Estimated Tissue Size (mm2) (133)	3D EC % Composition - <10 (120)	0.0036203	0.7405	0.0021084	0.963	0.00286435	0.130475
3D Estimated Tissue Size (mm2) (133)	Stress (mN/mm2) - Q4 (9)	0.00361403	0.028	0.00304596	0.0715	0.00332999	1.55284
3D Estimated Tissue Size (mm2) (133)	3D Stromal Cell Type - SC (34)	0.00359379	0.752	0.00449189	0.501	0.00404284	0.300162
3D Estimated Tissue Size (mm2) (133)	hiPSC-CM Media Supplement - Essential Lipids (6)	0.00358471	0.0805	0.00376969	0.077	0.0036772	1.11351
3D Estimated Tissue Size (mm2) (133)	Mechanical Maturation (34)	0.00357012	0.526	0.00281609	0.7015	0.0031931	0.279014
3D Estimated Tissue Size (mm2) (133)	hiPSC-CM Maintenance/Maturation Media (if different) - Reported (51)	0.00352159	0.641	0.00186595	0.9625	0.00269377	0.193142
3D Estimated Tissue Size (mm2) (133)	Amplitude (F/F0) Quantiles (50)	0.00351115	0.984	0.00356911	0.983	0.00354013	0.00744648
3D Estimated Tissue Size (mm2) (133)	hiPSC Backbone Media - mTeSR (102)	0.00348985	0.914	0.00480691	0.5985	0.00414838	0.222936
3D Estimated Tissue Size (mm2) (133)	3D Stromal Cell Type - hDF (7)	0.00348735	0.204	0.00472189	0.0745	0.00410462	1.12784
3D Estimated Tissue Size (mm2) (133)	Number of hiPSC Lines - 2 (50)	0.00347044	0.679	0.00217774	0.925	0.00282409	0.16813
3D Estimated Tissue Size (mm2) (133)	3D Endothelial Cell Type - Reported (33)	0.00346677	0.785	0.00334336	0.76	0.00340506	0.119186
3D Estimated Tissue Size (mm2) (133)	Induction Conditions - Activin A (75)	0.00336103	0.9075	0.00237032	0.98	0.00286568	0.0421534
3D Estimated Tissue Size (mm2) (133)	Induction Conditions - BMP4 (74)	0.00330441	0.8975	0.004263	0.6905	0.00378371	0.160836
3D Estimated Tissue Size (mm2) (133)	3D Endothelial Cell Type - HUVEC (9)	0.00323297	0.2725	0.00357053	0.2155	0.00340175	0.666553
3D Estimated Tissue Size (mm2) (133)	Max Capture Rate (Hz) Quantiles (15)	0.0032	0.4435	0.00319407	0.5135	0.00319704	0.353106
3D Estimated Tissue Size (mm2) (133)	Beat Rate (beats per minute) - Reported (54)	0.00318129	0.7995	0.00434309	0.478	0.00376219	0.320572
3D Estimated Tissue Size (mm2) (133)	Induction Duration - Reported (230)	0.00317855	0.835	0.00425286	0.55	0.00371571	0.259637
3D Estimated Tissue Size (mm2) (133)	Purification Stategy - Media (6)	0.00310625	0.1085	0.00355777	0.092	0.00333201	1.03621
3D Estimated Tissue Size (mm2) (133)	hiPSC-CM Matrix Coating if Replated - Fibronectin (32)	0.00305351	0.2945	0.00244314	0.509	0.00274832	0.530915
3D Estimated Tissue Size (mm2) (133)	Ancestry of hiPSC Lines - Asian (30)	0.0030429	0.7925	0.00363002	0.6345	0.00333646	0.197568
3D Estimated Tissue Size (mm2) (133)	Elastomeric Maturation (33)	0.00302676	0.1625	0.000814674	0.9205	0.00192072	0.789147
3D Estimated Tissue Size (mm2) (133)	hiPSC Line - WTC11 (30)	0.00302322	0.816	0.00237163	0.924	0.00269742	0.0883098
3D Estimated Tissue Size (mm2) (133)	Wnt Inhibition Duration - Reported (222)	0.0030115	0.8865	0.00108594	0.998	0.00204872	0.0523213
3D Estimated Tissue Size (mm2) (133)	Sarcomere/Cellular Alignment Analysis (67)	0.00293939	0.8335	0.00148635	0.991	0.00221287	0.0790944
3D Estimated Tissue Size (mm2) (133)	Cell Alignment Maturation (55)	0.00291094	0.7225	0.00314013	0.6345	0.00302553	0.197568
3D Estimated Tissue Size (mm2) (133)	3D Stromal Cell Type - hFF (6)	0.00287919	0.0755	0.00227083	0.206	0.00257501	1.12205
3D Estimated Tissue Size (mm2) (133)	hiPSC-CM Media Supplement - iCell Maintenance Medium (41)	0.00284855	0.6815	0.00467509	0.2445	0.00376182	0.611721
3D Estimated Tissue Size (mm2) (133)	Amplitude (F/F0) - Reported (50)	0.00284335	0.9065	0.00302633	0.8385	0.00293484	0.0764969
3D Estimated Tissue Size (mm2) (133)	3D SC % Composition - Reported (150)	0.00281766	0.02	0.00183348	0.1505	0.00232557	1.69897
3D Estimated Tissue Size (mm2) (133)	Sex of hiPSC Lines - Male (64)	0.00273554	0.9625	0.00232527	0.9815	0.0025304	0.0165993
3D Estimated Tissue Size (mm2) (133)	AP Conduction Velocity (cm/s) - Reported (28)	0.00266112	0.269	0.0023092	0.389	0.00248516	0.570248
3D Estimated Tissue Size (mm2) (133)	hiPSC-CM Matrix Coating if Replated - Gelatin (43)	0.00263302	0.668	0.00369114	0.407	0.00316208	0.390406
3D Estimated Tissue Size (mm2) (133)	hiPSC-CM Media Supplement - GlutaMax (8)	0.00262454	0.1015	0.00110784	0.665	0.00186619	0.993534
3D Estimated Tissue Size (mm2) (133)	Induction Conditions - bFGF (45)	0.00259054	0.861	0.00271858	0.7905	0.00265456	0.102098
3D Estimated Tissue Size (mm2) (133)	Ancestry of hiPSC Lines - Caucasian (42)	0.00258119	0.8345	0.00241975	0.8575	0.00250047	0.0785737
3D Estimated Tissue Size (mm2) (133)	Upstroke Velocity (um/s) - Q3 (11)	0.00255579	0.32	0.00195772	0.584	0.00225675	0.49485
3D Estimated Tissue Size (mm2) (133)	Conduction Velocity (cm/s) - Q1 (7)	0.00254549	0.0965	0.000934233	0.7015	0.00173986	1.01547
3D Estimated Tissue Size (mm2) (133)	Max Capture Rate (Hz) - Q1 (8)	0.0024923	0.202	0.00210347	0.33	0.00229789	0.694649
3D Estimated Tissue Size (mm2) (133)	Stress (mN/mm2) - Q3 (9)	0.00248414	0.446	0.000538642	0.988	0.00151139	0.350665
3D Estimated Tissue Size (mm2) (133)	Differentiation Purity % - 85 to 89 (24)	0.00248293	0.5645	0.00454417	0.1325	0.00351355	0.877784
3D Estimated Tissue Size (mm2) (133)	Gene Analysis Method - RNA (57)	0.00246285	0.9385	0.00446304	0.4785	0.00346294	0.320118
3D Estimated Tissue Size (mm2) (133)	hiPSC-CM Media Supplement - B27 (174)	0.00245364	0.994	0.0020093	0.995	0.00223147	0.00261362
3D Estimated Tissue Size (mm2) (133)	3D Tissue Media - iCell Maintenance Medium (12)	0.00241479	0.523	0.00166424	0.8225	0.00203952	0.281498
3D Estimated Tissue Size (mm2) (133)	Beat Rate (beats per minute) Quantiles (54)	0.00240224	0.998	0.0032993	0.976	0.00285077	0.0105502
3D Estimated Tissue Size (mm2) (133)	Force (mN) - Q3 (11)	0.00236747	0.5435	0.00148315	0.8645	0.00192531	0.2648
3D Estimated Tissue Size (mm2) (133)	Sarcomere Length (um) Quantiles (64)	0.0023438	0.9935	0.0041704	0.878	0.0032571	0.0565055
3D Estimated Tissue Size (mm2) (133)	Purification Duration - 6 days (10)	0.00232207	0.064	0.00239317	0.0935	0.00235762	1.19382
3D Estimated Tissue Size (mm2) (133)	AP Amplitude (mV) Quantiles (40)	0.00230218	0.9675	0.00138368	0.9975	0.00184293	0.014349
3D Estimated Tissue Size (mm2) (133)	Electrophysiology Analysis Method - Patch Clamp (55)	0.00229735	0.9365	0.00387655	0.583	0.00308695	0.234331
3D Estimated Tissue Size (mm2) (133)	Resting Membrane Potential (mV) - Reported (44)	0.0022733	0.926	0.00243846	0.8745	0.00235588	0.0582402
3D Estimated Tissue Size (mm2) (133)	hiPSC-CM Media Supplement - HEPES (16)	0.00221136	0.6935	0.00306675	0.452	0.00263906	0.344862
3D Estimated Tissue Size (mm2) (133)	Metabolic Maturation Strategy (Broad) - Hormonal Stimulation (15)	0.00217001	0.1745	0.00184441	0.307	0.00200721	0.758205
3D Estimated Tissue Size (mm2) (133)	3D Stromal Cell Type - hMSC (12)	0.00209497	0.7795	0.00177013	0.864	0.00193255	0.108184
3D Estimated Tissue Size (mm2) (133)	Stress (mN/mm2) - Q1 (10)	0.00207125	0.3205	0.00287623	0.1525	0.00247374	0.81673
3D Estimated Tissue Size (mm2) (133)	hiPSC Backbone Media - Specialised (17)	0.00206961	0.7635	0.00236886	0.69	0.00221923	0.161151
3D Estimated Tissue Size (mm2) (133)	hiPSC Line - BJ1 (7)	0.00202712	0.333	0.00070833	0.897	0.00136772	0.477556
3D Estimated Tissue Size (mm2) (133)	Conduction Velocity (cm/s) - Reported (14)	0.00202681	0.4385	0.00269135	0.29	0.00235908	0.537602
3D Estimated Tissue Size (mm2) (133)	3D Stromal Cell Type - hiPSC-CF (8)	0.00199231	0.2295	0.00271891	0.082	0.00235561	1.08619
3D Estimated Tissue Size (mm2) (133)	hiPSC-CM Media Supplement - VEGF (4)	0.00197837	0.036	0.00230318	0.0205	0.00214077	1.68825
3D Estimated Tissue Size (mm2) (133)	Scanning Electron Microscopy (21)	0.00190397	0.3885	0.000963028	0.8485	0.0014335	0.410609
3D Estimated Tissue Size (mm2) (133)	3D Endothelial Cell Type - Specialised (3)	0.00190054	0.035	0.00113144	0.248	0.00151599	1.45593
3D Estimated Tissue Size (mm2) (133)	Wnt Inhibitor - IWR (54)	0.00188938	0.979	0.00235198	0.942	0.00212068	0.0259491
3D Estimated Tissue Size (mm2) (133)	3D Endothelial Cell Type - CMVEC (5)	0.00187801	0.28	0.00198852	0.308	0.00193327	0.552842
3D Estimated Tissue Size (mm2) (133)	3D Tissue Media - StemPro-34 (4)	0.00186927	0.2855	0.000873945	0.7655	0.00137161	0.544394
3D Estimated Tissue Size (mm2) (133)	2D Surface - Micropatterned (24)	0.00183512	0.404	0.00125631	0.71	0.00154572	0.393619
3D Estimated Tissue Size (mm2) (133)	Resting Membrane Potential (mV) Quantiles (44)	0.00183162	0.9965	0.00226621	0.992	0.00204892	0.00348833
3D Estimated Tissue Size (mm2) (133)	2D Surface - Reported (137)(177)	0.00180207	0.9785	0.00203622	0.968	0.00191915	0.0141246
3D Estimated Tissue Size (mm2) (133)	Calcium Handling Analysis Method - Genetical (23)	0.00177359	0.895	0.00247187	0.7415	0.00212273	0.129889
3D Estimated Tissue Size (mm2) (133)	Number of hiPSC Lines - 3 (27)	0.00175112	0.688	0.00276563	0.375	0.00225838	0.425969
3D Estimated Tissue Size (mm2) (133)	Disease Modelling - Arrhythmic (15)	0.00174038	0.561	0.000985737	0.894	0.00136306	0.251037
3D Estimated Tissue Size (mm2) (133)	Differentiation Purity Assessment - IHC cTnT (7)	0.00172859	0.1895	0.00295317	0.0525	0.00234088	1.27984
3D Estimated Tissue Size (mm2) (133)	hiPSC-CM Backbone Media - IMDM/E8/BPEL/APEL (8)	0.00172109	0.4255	0.00146962	0.605	0.00159535	0.3711
3D Estimated Tissue Size (mm2) (133)	3D Platform - Polyethylene Glycol (8)	0.00171791	0.291	0.00106544	0.7035	0.00139167	0.536107
3D Estimated Tissue Size (mm2) (133)	AP Amplitude (mV) - Reported(40)	0.0017171	0.9325	0.000700478	0.999	0.00120879	0.0303512
3D Estimated Tissue Size (mm2) (133)	Stress (mN/mm2) - Q2 (9)	0.00171625	0.311	0.00243009	0.1625	0.00207317	0.789147
3D Estimated Tissue Size (mm2) (133)	Max Capture Rate (Hz) - Reported (15)	0.00171408	0.822	0.00299241	0.4645	0.00235325	0.333014
3D Estimated Tissue Size (mm2) (133)	Extracellular Matrix Maturation (18)	0.00170593	0.563	0.00355764	0.1295	0.00263179	0.88773
3D Estimated Tissue Size (mm2) (133)	Amplitude (F/F0) - Q1 (13)	0.00169939	0.6125	0.00301391	0.219	0.00235665	0.659556
3D Estimated Tissue Size (mm2) (133)	Force (mN) - Q4 (12)	0.00169295	0.331	0.00208817	0.274	0.00189056	0.562249
3D Estimated Tissue Size (mm2) (133)	3D Stromal Cell Type - Specialised (11)	0.00166897	0.8465	0.00166723	0.87	0.0016681	0.072373
3D Estimated Tissue Size (mm2) (133)	Upstroke Velocity (um/s) - Reported (40)	0.00166758	0.9875	0.0023764	0.906	0.00202199	0.0428718
3D Estimated Tissue Size (mm2) (133)	hiPSC-CM Matrix Coating if Replated - Laminin (5)	0.00165349	0.002	0.0010331	0.0625	0.00134329	2.69897
3D Estimated Tissue Size (mm2) (133)	hiPSC Line - Cor.4U (16)	0.00164704	0.311	0.000879769	0.7895	0.00126341	0.50724
3D Estimated Tissue Size (mm2) (133)	hiPSC-CM Media Supplement - Transferrin (11)	0.00163176	0.7705	0.00251777	0.4925	0.00207476	0.307594
3D Estimated Tissue Size (mm2) (133)	Pharmacological Interventions - Verapamil (27)	0.00162801	0.939	0.00291433	0.642	0.00227117	0.192465
3D Estimated Tissue Size (mm2) (133)	hiPSC-CM Backbone Media - DMEM (18)	0.00162746	0.178	0.00146547	0.3215	0.00154647	0.74958
3D Estimated Tissue Size (mm2) (133)	Disease Modelling - DCM (5)	0.00161045	0.171	0.000955315	0.56	0.00128288	0.767004
3D Estimated Tissue Size (mm2) (133)	Beat Rate (beats per minute) - Q1 (15)	0.00161028	0.4465	0.00203357	0.3555	0.00182193	0.44916
3D Estimated Tissue Size (mm2) (133)	hiPSC-CM Media Supplement - L-ascorbic acid (39)	0.00158969	0.9845	0.00455934	0.3545	0.00307452	0.450384
3D Estimated Tissue Size (mm2) (133)	hiPSC-CM Media Supplement - 1-thioglycerol (14)	0.00157355	0.611	0.00215193	0.4375	0.00186274	0.359022
3D Estimated Tissue Size (mm2) (133)	Wnt Inhibitor - KY02111 (7)	0.00155575	0.061	0.00168857	0.081	0.00162216	1.21467
3D Estimated Tissue Size (mm2) (133)	3D EC % Composition - Reported (150)	0.00154454	0.217	0.0017686	0.216	0.00165657	0.665546
3D Estimated Tissue Size (mm2) (133)	Metabolic Maturation (30)	0.00153711	0.632	0.00187326	0.573	0.00170519	0.241845
3D Estimated Tissue Size (mm2) (133)	3D Endothelial Cell Type - hiPSC-EC (16)	0.00152602	0.6715	0.00149305	0.734	0.00150954	0.172954
3D Estimated Tissue Size (mm2) (133)	hiPSC Line - PGP1 (11)	0.00152512	0.6385	0.00257923	0.329	0.00205217	0.482804
3D Estimated Tissue Size (mm2) (133)	Disease Modelling - Left Ventricular (15)	0.00152164	0.729	0.00285	0.305	0.00218582	0.5157
3D Estimated Tissue Size (mm2) (133)	hiPSC-CM Backbone Media - StemPro-34 (14)	0.00150184	0.7505	0.00130945	0.86	0.00140565	0.124649
3D Estimated Tissue Size (mm2) (133)	Disease Modelling - Myocardium (11)	0.00148966	0.836	0.00121809	0.9055	0.00135387	0.0777937
3D Estimated Tissue Size (mm2) (133)	Differentiation Purity Assessment - Flow Cytometry a-actinin+ (9)	0.00148332	0.1155	0.000144411	0.9225	0.000813863	0.937418
3D Estimated Tissue Size (mm2) (133)	Differentiation Purity % - 75 to 79 (8)	0.00146734	0.5765	0.00162122	0.547	0.00154428	0.262013
3D Estimated Tissue Size (mm2) (133)	Disease Modelling - Acute Myocardial Infarction (4)	0.00144497	0.3755	0.00176422	0.3105	0.00160459	0.507938
3D Estimated Tissue Size (mm2) (133)	3D % Confluency - 85 to 89 (12)	0.00144282	0.446	0.00130674	0.5715	0.00137478	0.350665
3D Estimated Tissue Size (mm2) (133)	Wnt Inhibitor - VEGF (3)	0.0014241	0.005	0.000960193	0.0715	0.00119215	2.30103
3D Estimated Tissue Size (mm2) (133)	Metabolic Analysis Method - Reported (45)	0.00138462	0.9545	0.0017864	0.902	0.00158551	0.0447935
3D Estimated Tissue Size (mm2) (133)	Disease Modelling - Genetic Disorders (23)	0.0013492	0.8955	0.00175863	0.807	0.00155391	0.0931265
3D Estimated Tissue Size (mm2) (133)	T-tubules Observed (18)	0.00134846	0.7405	0.000952638	0.8975	0.00115055	0.130475
3D Estimated Tissue Size (mm2) (133)	Upstroke Velocity (um/s) - Q1 (10)	0.00134288	0.137	0.00168114	0.1075	0.00151201	0.968592
3D Estimated Tissue Size (mm2) (133)	Amplitude (F/F0) - Q3 (12)	0.00133882	0.739	0.00119427	0.847	0.00126655	0.131356
3D Estimated Tissue Size (mm2) (133)	Differentiation Purity % - 80 to 84 (25)	0.00133689	0.9025	0.00126093	0.9375	0.00129891	0.0445528
3D Estimated Tissue Size (mm2) (133)	hiPSC-CM Media Supplement - bFGF (3)	0.00132752	0.12	0.00159748	0.116	0.0014625	0.935542
3D Estimated Tissue Size (mm2) (133)	3D Platform - Gelatin (6)	0.00132709	0.1035	0.00203903	0.035	0.00168306	1.45593
3D Estimated Tissue Size (mm2) (133)	Number of hiPSC Lines - >5 (8)	0.00132508	0.14	0.00124933	0.2305	0.00128721	0.853872
3D Estimated Tissue Size (mm2) (133)	Metabolic Maturation Strategy (Broad) - Fatty Acid and Lipids (19)	0.00131029	0.2915	0.000533122	0.8135	0.000921708	0.535361
3D Estimated Tissue Size (mm2) (133)	Time to Peak (ms) - Q2 (10)	0.00129814	0.764	0.00202822	0.479	0.00166318	0.319664
3D Estimated Tissue Size (mm2) (133)	3D Tissue Media - EGM2 (6)	0.0012821	0.5125	0.00190259	0.2875	0.00159234	0.541362
3D Estimated Tissue Size (mm2) (133)	Time to Relaxation (ms) Quantiles (10)	0.00128173	0.542	0.000906283	0.775	0.001094	0.266001
3D Estimated Tissue Size (mm2) (133)	Resting Membrane Potential (mV) - Q4 (9)	0.00126599	0.4865	0.00158158	0.4225	0.00142378	0.374173
3D Estimated Tissue Size (mm2) (133)	Metabolic Maturation Strategy (Broad) - Thyroid Hormones (14)	0.00126223	0.339	0.000892642	0.6395	0.00107743	0.4698
3D Estimated Tissue Size (mm2) (133)	Resting Membrane Potential (mV) - Q1 (11)	0.00125216	0.148	0.000714776	0.4925	0.000983469	0.829738
3D Estimated Tissue Size (mm2) (133)	Wnt Inhibition Duration - 4 days (19)	0.00125005	0.747	0.00311309	0.1665	0.00218157	0.778586
3D Estimated Tissue Size (mm2) (133)	Sarcomere Length (um) Q1 <1.7 (19)	0.00123757	0.499	0.000753493	0.818	0.000995531	0.301899
3D Estimated Tissue Size (mm2) (133)	Electrophysiology Analysis Method - Microelectrode (29)	0.0012308	0.355	0.000962399	0.5855	0.0010966	0.449772
3D Estimated Tissue Size (mm2) (133)	Time to Relaxation (ms) - Q1 (5)	0.00122831	0.1405	0	0.925	0.00122831	0.852324
3D Estimated Tissue Size (mm2) (133)	Metabolic Maturation Strategy (Broad) - Growth Factors (4)	0.00121414	0.3125	0.00130981	0.3305	0.00126197	0.50515
3D Estimated Tissue Size (mm2) (133)	2D Surface - Microparticle/fluid (3)	0.00119483	0.0205	0	0.7175	0.00119483	1.68825
3D Estimated Tissue Size (mm2) (133)	Wnt Inhibition Duration - 1 day (12)	0.0011869	0.4045	0.00157567	0.3005	0.00138129	0.522156
3D Estimated Tissue Size (mm2) (133)	hiPSC Line - C25 (6)	0.00117794	0.388	0.00112647	0.4785	0.00115221	0.411168
3D Estimated Tissue Size (mm2) (133)	hiPSC-CM Backbone Media - Commercial Cardiomyocyte Kit (12)	0.00117244	0.3315	0.000765191	0.67	0.000968814	0.479516
3D Estimated Tissue Size (mm2) (133)	Wnt Inhibition Duration - 3 days (17)	0.00110568	0.9265	0.00142411	0.8975	0.00126489	0.0469655
3D Estimated Tissue Size (mm2) (133)	3D Platform - Decellularised (15)	0.00110075	0.696	0.0027612	0.176	0.00193098	0.754487
3D Estimated Tissue Size (mm2) (133)	Metabolic Analysis Method - Seahorse (35)	0.00108106	0.974	0.00190476	0.814	0.00149291	0.0893756
3D Estimated Tissue Size (mm2) (133)	Wnt Inhibitor - XAV939 (23)	0.00107688	0.9655	0.00140373	0.9085	0.00124031	0.0416751
3D Estimated Tissue Size (mm2) (133)	AP Conduction Velocity (cm/s) - Q1 (7)	0.00107287	0.227	0.0009139	0.357	0.000993384	0.643974
3D Estimated Tissue Size (mm2) (133)	Purification Duration - <3 days (17)	0.00102567	0.8865	0.00379167	0.1625	0.00240867	0.789147
3D Estimated Tissue Size (mm2) (133)	hiPSC-CM Media Supplement - Mercaptoethanol (10)	0.00102184	0.2285	0.000225514	0.8505	0.000623679	0.641114
3D Estimated Tissue Size (mm2) (133)	hiPSC Backbone Media - Embryonic Stem Cell (20)	0.00101715	0.618	0.00112585	0.6565	0.0010715	0.209012
3D Estimated Tissue Size (mm2) (133)	hiPSC Line - Gibco episomal (10)	0.00101644	0.6155	0.00382208	0.0355	0.00241926	1.44977
3D Estimated Tissue Size (mm2) (133)	hiPSC-CM Media Supplement - Polyvinylalchohol (6)	0.000998517	0.7815	0.00243616	0.247	0.00171734	0.607303
3D Estimated Tissue Size (mm2) (133)	Metabolic Maturation Strategy - IGF-1 (3)	0.000990095	0.2525	0.00100821	0.2725	0.000999154	0.597739
3D Estimated Tissue Size (mm2) (133)	Purification Duration - 3 days (12)	0.000971264	0.8375	0.000920329	0.8725	0.000945797	0.0770152
3D Estimated Tissue Size (mm2) (133)	Differentiation Purity % - 95 to 100 (35)	0.000963282	0.962	0.00144752	0.892	0.0012054	0.0496351
3D Estimated Tissue Size (mm2) (133)	3D Platform - Fibronectin (3)	0.000955935	0.0535	0.00169906	0.006	0.0013275	2.22185
3D Estimated Tissue Size (mm2) (133)	3D Platform - Reported (154)	0.00094566	0.253	0.00142222	0.1255	0.00118394	0.901356
3D Estimated Tissue Size (mm2) (133)	Contractile Analysis Method - Specialised (6)	0.000937593	0.055	0.00101943	0.0545	0.00097851	1.2636
3D Estimated Tissue Size (mm2) (133)	Sex of hiPSC Lines - Female (42)	0.000934019	0.971	0.000629238	0.9925	0.000781629	0.0127808
3D Estimated Tissue Size (mm2) (133)	hiPSC-CM Media Supplement - FBS (16)	0.000923589	0.494	0.00155059	0.275	0.00123709	0.560667
3D Estimated Tissue Size (mm2) (133)	Beat Rate (beats per minute) - Q3 (10)	0.000920104	0.867	0.000336987	0.9865	0.000628546	0.0619809
3D Estimated Tissue Size (mm2) (133)	Gene Analysis Method - Specialised (6)	0.000913347	0.2745	0.00187491	0.065	0.00139413	1.18709
3D Estimated Tissue Size (mm2) (133)	hiPSC-CM Media Supplement - Selenium (7)	0.000863289	0.8495	0.0011269	0.7695	0.000995096	0.113791
3D Estimated Tissue Size (mm2) (133)	Time to Peak (ms) - Q1 (11)	0.000838159	0.705	0.000785574	0.8155	0.000811867	0.151811
3D Estimated Tissue Size (mm2) (133)	hiPSC Line - DF19-9-11T.H (16)	0.00083258	0.7355	0.000827123	0.774	0.000829851	0.133417
3D Estimated Tissue Size (mm2) (133)	3D CM % Composition - Reported (150)	0.000822172	0.566	0.00144925	0.3055	0.00113571	0.514989
3D Estimated Tissue Size (mm2) (133)	Purification Duration - >9 days (5)	0.000809297	0.3485	0	0.9255	0.000809297	0.457797
3D Estimated Tissue Size (mm2) (133)	Disease Modelling - Arrhythmogenic Cardiomyopathy (10)	0.000787963	0.8575	0.00103516	0.782	0.000911563	0.106793
3D Estimated Tissue Size (mm2) (133)	hiPSC Backbone Media - DMEM (10)	0.000778385	0.757	0.00168812	0.3915	0.00123325	0.407268
3D Estimated Tissue Size (mm2) (133)	3D Tissue Media - MEM-α (6)	0.000773438	0.63	0.00106595	0.5285	0.000919696	0.276955
3D Estimated Tissue Size (mm2) (133)	Max Capture Rate (Hz) - Q2 (7)	0.000767538	0.779	0.00171118	0.375	0.00123936	0.425969
3D Estimated Tissue Size (mm2) (133)	Sarcomere Length (um) Q3 >1.9 (17)	0.00076636	0.8725	0	0.9985	0.00076636	0.0592346
3D Estimated Tissue Size (mm2) (133)	Electrophysiology Analysis Method - Motion-Contrast Reconstruction (4)	0.000763595	0.116	0.000477992	0.388	0.000620794	0.935542
3D Estimated Tissue Size (mm2) (133)	Purification Stategy - Cell Sorting (7)	0.000763238	0.3555	0.00063958	0.5185	0.000701409	0.44916
3D Estimated Tissue Size (mm2) (133)	Time to Relaxation (ms) - Reported (10)	0.000759426	0.749	0.000725311	0.7955	0.000742368	0.125518
3D Estimated Tissue Size (mm2) (133)	Amplitude (F/F0) - Q2 (13)	0.000735299	0.6015	0.000216613	0.927	0.000475956	0.220764
3D Estimated Tissue Size (mm2) (133)	3D Tissue Media - Specialised (4)	0.00073461	0.6385	0.000940285	0.584	0.000837447	0.233587
3D Estimated Tissue Size (mm2) (133)	hiPSC Line - iCell2 (8)	0.000727468	0.776	0.00126187	0.583	0.00099467	0.234331
3D Estimated Tissue Size (mm2) (133)	Purification Stategy - Antibiotic (3)	0.000722775	0.1025	0.000148573	0.6905	0.000435674	0.989276
3D Estimated Tissue Size (mm2) (133)	Metabolic Maturation Strategy (Broad) - Known (30)	0.000719741	0.9295	0.000882338	0.924	0.000801039	0.034328
3D Estimated Tissue Size (mm2) (133)	Force (mN) - Q1 (13)	0.000703121	0.938	0.00125831	0.831	0.000980715	0.080399
3D Estimated Tissue Size (mm2) (133)	Differentiation Purity Assessment - Flow Cytometry VCAM1+ (4)	0.00069859	0.6995	0.000989511	0.618	0.000844051	0.209012
3D Estimated Tissue Size (mm2) (133)	hiPSC-CM Maintenance/Maturation Media (if different) - RPMI-1640 (26)	0.00069118	0.9965	0.00138244	0.949	0.00103681	0.0227338
3D Estimated Tissue Size (mm2) (133)	Sex of hiPSC Lines - Both (10)	0.000679028	0.9085	0.00104255	0.807	0.000860791	0.0931265
3D Estimated Tissue Size (mm2) (133)	Purification Duration - 5 days (6)	0.000651245	0.444	0.000192537	0.901	0.000421891	0.352617
3D Estimated Tissue Size (mm2) (133)	hiPSC Backbone Media - StemFit (5)	0.000619072	0.473	0.000552339	0.6165	0.000585706	0.325139
3D Estimated Tissue Size (mm2) (133)	Pharmacological Interventions - Specialised (16)	0.000616279	0.9105	0.000752121	0.9065	0.0006842	0.0426322
3D Estimated Tissue Size (mm2) (133)	Metabolic Maturation Strategy - Linoleic/Oleic Acid (4)	0.00061261	0.1365	0.000444181	0.3475	0.000528396	0.864867
3D Estimated Tissue Size (mm2) (133)	3D Tissue Media - High-glucose DMEM (7)	0.000612071	0.7145	0.000524375	0.825	0.000568223	0.145998
3D Estimated Tissue Size (mm2) (133)	AP Amplitude (mV) - Q2 (10)	0.000600197	0.4655	0	0.922	0.000600197	0.33208
3D Estimated Tissue Size (mm2) (133)	Upstroke Velocity (um/s) - Q4 (9)	0.000595406	0.8845	0.00113191	0.672	0.000863657	0.172631
3D Estimated Tissue Size (mm2) (133)	hiPSC Line - Reported (310)	0.000589632	0.215	0	0.7565	0.000589632	0.667562
3D Estimated Tissue Size (mm2) (133)	Pharmacological Interventions - Metoprolol (5)	0.000577252	0.217	0.000567983	0.264	0.000572618	0.66354
3D Estimated Tissue Size (mm2) (133)	hiPSC Line - IMR90 (19)	0.000544776	0.8765	0.000949447	0.736	0.000747112	0.133122
3D Estimated Tissue Size (mm2) (133)	Pharmacological Interventions - E4031 (22)	0.000543317	0.9865	0.0014067	0.8725	0.000975006	0.0592346
3D Estimated Tissue Size (mm2) (133)	Beat Rate (beats per minute) - Q4 (13)	0.000533956	0.8575	0.000140705	0.9855	0.00033733	0.0667659
3D Estimated Tissue Size (mm2) (133)	3D Tissue Media - Cor.4U (3)	0.000511156	0.22	0.00022332	0.589	0.000367238	0.657577
3D Estimated Tissue Size (mm2) (133)	Metabolic Maturation Strategy (Broad) - Metabolic Modulation (19)	0.000487473	0.816	0	0.973	0.000487473	0.0883098
3D Estimated Tissue Size (mm2) (133)	Differentiation Purity % - 70 to 74 (10)	0.000484879	0.615	0	0.912	0.000484879	0.211125
3D Estimated Tissue Size (mm2) (133)	hiPSC-CM Maintenance/Maturation Media (if different) - Specialised (8)	0.000481481	0.5875	0.000366221	0.7265	0.000423851	0.230992
3D Estimated Tissue Size (mm2) (133)	AP Conduction Velocity (cm/s) - Q2 (8)	0.00047888	0.3065	0.000801965	0.122	0.000640423	0.91364
3D Estimated Tissue Size (mm2) (133)	Wnt Inhibitor - Others (9)	0.000468657	0.812	0.000827638	0.652	0.000648147	0.185752
3D Estimated Tissue Size (mm2) (133)	Beat Rate (beats per minute) - Q2 (16)	0.000468169	0.8075	0.000418064	0.857	0.000443117	0.0928575
3D Estimated Tissue Size (mm2) (133)	hiPSC-CM Backbone Media - Cor.4U Complete Medium (6)	0.000447001	0.2705	1.50566e-05	0.723	0.000231029	0.567833
3D Estimated Tissue Size (mm2) (133)	2D Surface - Hydrogel (14)	0.00043124	0.2875	0.000809136	0.113	0.000620188	0.946922
3D Estimated Tissue Size (mm2) (133)	Measured Fatty Acid Metabolism (18)	0.000429319	0.9545	0.000237927	0.983	0.000333623	0.0202241
3D Estimated Tissue Size (mm2) (133)	Metabolic Maturation Strategy - B27 (3)	0.000422393	0.2485	0	0.7095	0.000422393	0.604674
3D Estimated Tissue Size (mm2) (133)	Number of hiPSC Lines - 4 (10)	0.000418586	0.957	0.00105981	0.812	0.000739196	0.090444
3D Estimated Tissue Size (mm2) (133)	Metabolic Maturation Strategy - Dexamethasone (7)	0.000413061	0.623	0.00014888	0.911	0.00028097	0.205512
3D Estimated Tissue Size (mm2) (133)	2D % Confluency - 95 to 100 (13)	0.000412297	0.9155	0.00118832	0.653	0.000800308	0.185087
3D Estimated Tissue Size (mm2) (133)	Resting Membrane Potential (mV) - Q2 (13)	0.000396905	0.937	0.0013607	0.5365	0.000878805	0.27043
3D Estimated Tissue Size (mm2) (133)	hiPSC-CM Maintenance/Maturation Media (if different) - DMEM (11)	0.000385924	0.8385	0.000491462	0.8515	0.000438693	0.0764969
3D Estimated Tissue Size (mm2) (133)	AP Amplitude (mV) - Q4 (10)	0.000371179	0.3935	0	0.744	0.000371179	0.405055
3D Estimated Tissue Size (mm2) (133)	3D % Confluency - 95 to 100 (15)	0.000354946	0.9395	0.000648092	0.8685	0.000501519	0.0612302
3D Estimated Tissue Size (mm2) (133)	Disease Modelling - Specialised (3)	0.000350174	0.694	0.00022332	0.8335	0.000286747	0.158641
3D Estimated Tissue Size (mm2) (133)	Pharmacological Interventions - Blebbistatin (5)	0.000344726	0.8475	0.000601314	0.7475	0.00047302	0.126389
3D Estimated Tissue Size (mm2) (133)	2D % Confluency - 85 to 89 (31)	0.000344217	0.949	0	0.9945	0.000344217	0.0227338
3D Estimated Tissue Size (mm2) (133)	Wnt Inhibition Duration - 6 days (4)	0.000329883	0.3795	0	0.7315	0.000329883	0.420788
3D Estimated Tissue Size (mm2) (133)	Disease Modelling - Fibrotic (3)	0.000319236	0.8645	0	0.9735	0.000319236	0.063235
3D Estimated Tissue Size (mm2) (133)	hiPSC-CM Maintenance/Maturation Media (if different) - DMEM/F12 (6)	0.000310949	0.3565	0	0.7085	0.000310949	0.44794
3D Estimated Tissue Size (mm2) (133)	Wnt Inhibitor - BMP4 (7)	0.000303617	0.6685	0.000705703	0.46	0.00050466	0.337242
3D Estimated Tissue Size (mm2) (133)	Pharmacological Interventions - Ranolazine (6)	0.000302366	0.391	0.000255817	0.6145	0.000279092	0.407823
3D Estimated Tissue Size (mm2) (133)	hiPSC-CM Media Supplement - Specialised (13)	0.000292271	0.953	0.00284998	0.076	0.00157112	1.11919
3D Estimated Tissue Size (mm2) (133)	hiPSC Line - SCVI-273 (8)	0.000286018	0.9	0.00079843	0.672	0.000542224	0.172631
3D Estimated Tissue Size (mm2) (133)	Differentiation Purity Assessment - Specialised (10)	0.000285656	0.7555	0.00130229	0.1565	0.000793971	0.805486
3D Estimated Tissue Size (mm2) (133)	Purification Duration - 8 days (4)	0.000283196	0.521	0.000633196	0.2285	0.000458196	0.641114
3D Estimated Tissue Size (mm2) (133)	Amplitude (F/F0) - Q4 (12)	0.00028246	0.983	0.000289425	0.9865	0.000285943	0.00744648
3D Estimated Tissue Size (mm2) (133)	AP Amplitude (mV) - Q3 (9)	0.000277395	0.9905	0.000174019	0.9975	0.000225707	0.00414552
3D Estimated Tissue Size (mm2) (133)	hiPSC-CM Media Supplement - Lipid Mix (5)	0.000262652	0.9865	0.000616755	0.943	0.000439704	0.0254883
3D Estimated Tissue Size (mm2) (133)	AP Conduction Velocity (cm/s) - Q3 (6)	0.000258749	0.776	0.000239053	0.8345	0.000248901	0.110138
3D Estimated Tissue Size (mm2) (133)	Metabolic Maturation Strategy - Taurine (3)	0.000244979	0.474	0	0.71	0.000244979	0.324222
3D Estimated Tissue Size (mm2) (133)	Time to Peak (ms) - Q3 (10)	0.000244697	0.904	0.000267445	0.9285	0.000256071	0.0438316
3D Estimated Tissue Size (mm2) (133)	Differentiation Purity Assessment - IHC a-actinin (8)	0.00022942	0.52	0	0.7365	0.00022942	0.283997
3D Estimated Tissue Size (mm2) (133)	Time to Peak (ms) - Q4 (10)	0.000214491	0.91	0.000497906	0.8515	0.000356199	0.0698153
3D Estimated Tissue Size (mm2) (133)	AP Amplitude (mV) - Q1 (11)	0.00020958	0.969	0.000972027	0.7455	0.000590803	0.127552
3D Estimated Tissue Size (mm2) (133)	3D Tissue Media - Iscove (5)	0.000185886	0.8645	0	0.9285	0.000185886	0.063235
3D Estimated Tissue Size (mm2) (133)	3D Stromal Cell Type - SMC (3)	0.000177073	0.633	0	0.7385	0.000177073	0.198596
3D Estimated Tissue Size (mm2) (133)	Metabolic Maturation Strategy (Broad) - Glucocorticoids (7)	0.000172387	0.88	0.000396855	0.7845	0.000284621	0.105407
3D Estimated Tissue Size (mm2) (133)	Metabolic Maturation Strategy - T3 (14)	0.000172154	0.9425	0.00039637	0.904	0.000284262	0.0438316
3D Estimated Tissue Size (mm2) (133)	Metabolic Maturation Strategy - Reported (30)	0.000169609	0.9985	0.000130321	0.998	0.000149965	0.000869459
3D Estimated Tissue Size (mm2) (133)	hiPSC-CM Matrix Coating if Replated - Synthemax (3)	0.000163676	0.6135	0.00045744	0.3715	0.000310558	0.430041
3D Estimated Tissue Size (mm2) (133)	Induction Duration - 4 days (15)	0.000159357	0.941	0.000821795	0.599	0.000490576	0.222573
3D Estimated Tissue Size (mm2) (133)	Disease Modelling - Ischemic/Infarction (7)	0.000135301	0.978	0.00122473	0.615	0.000680017	0.211125
3D Estimated Tissue Size (mm2) (133)	Differentiation Purity Assessment - Flow Cytometry SIRPA+ (4)	0.000130096	0.6385	0.000405136	0.392	0.000267616	0.406714
3D Estimated Tissue Size (mm2) (133)	Upstroke Velocity (um/s) - Q2 (10)	0.000127562	0.9755	0	0.9885	0.000127562	0.0107727
3D Estimated Tissue Size (mm2) (133)	Resting Membrane Potential (mV) - Q3 (11)	0.000126566	0.9945	0.000414053	0.977	0.00027031	0.0101054
3D Estimated Tissue Size (mm2) (133)	Disease Modelling - Long QT Syndrome (3)	0.000125409	0.6105	0	0.7455	0.000125409	0.214314
3D Estimated Tissue Size (mm2) (133)	Pharmacological Interventions - Carbenoxolone (4)	0.000125289	0.636	0	0.7585	0.000125289	0.196543
3D Estimated Tissue Size (mm2) (133)	hiPSC Line - 201B7 (9)	0.000124981	0.6275	0.000148573	0.694	0.000136777	0.202386
3D Estimated Tissue Size (mm2) (133)	Pharmacological Interventions - Lidocaine (7)	0.000120162	0.86	0	0.9225	0.000120162	0.0655015
3D Estimated Tissue Size (mm2) (133)	Metabolic Maturation Strategy - Specialised (9)	0.000116348	0.612	0.000225045	0.5535	0.000170696	0.256882
3D Estimated Tissue Size (mm2) (133)	Pharmacological Interventions - Epinephrine (10)	5.3134e-05	0.9635	0.000559008	0.827	0.000306071	0.0824945
3D Estimated Tissue Size (mm2) (133)	Wnt Inhibitor - bFGF (8)	0	0.8945	0.000120404	0.9085	0.000120404	0.0484197
3D Estimated Tissue Size (mm2) (133)	hiPSC-CM Matrix Coating if Replated - Geltrex (10)	0	0.9855	0.000151198	0.987	0.000151198	0.00634337
3D Estimated Tissue Size (mm2) (133)	Metabolic Maturation Strategy - Creatine (3)	0	0.676	0.000151198	0.7125	0.000151198	0.170053
3D Estimated Tissue Size (mm2) (133)	Metabolic Maturation Strategy (Broad) - Structural and Functional Protein (5)	0	0.6665	0.000189027	0.7195	0.000189027	0.1762
3D Estimated Tissue Size (mm2) (133)	Metabolic Maturation Strategy - L-carnitine (6)	0	0.6775	0.000198039	0.705	0.000198039	0.169091
3D Estimated Tissue Size (mm2) (133)	Metabolic Maturation Strategy - Palmitic Acid (10)	0	0.8905	0.000202479	0.831	0.000202479	0.080399
3D Estimated Tissue Size (mm2) (133)	Pharmacological Interventions - Cisapride (5)	0	0.699	0.000223057	0.5635	0.000223057	0.249106
3D Estimated Tissue Size (mm2) (133)	AP Conduction Velocity (cm/s) - Q4 (7)	0	0.6735	0.000223583	0.571	0.000223583	0.243364
3D Estimated Tissue Size (mm2) (133)	3D Platform - Nanotechnology (3)	0	0.6805	0.000236005	0.5515	0.000236005	0.258454
3D Estimated Tissue Size (mm2) (133)	Wnt Inhibition Duration - 5 days (6)	0	0.6605	0.000238515	0.5575	0.000238515	0.253755
3D Estimated Tissue Size (mm2) (133)	Pharmacological Interventions - Carbamylcholine (6)	0	0.6895	0.000299098	0.5815	0.000299098	0.23545
3D Estimated Tissue Size (mm2) (133)	Metabolic Maturation Strategy (Broad) - Nutrition and Supplements (6)	0	0.6935	0.000306679	0.5025	0.000306679	0.298864
3D Estimated Tissue Size (mm2) (133)	3D % Confluency - 90 to 94 (11)	0	0.6735	0.000356471	0.4635	0.000356471	0.33395
3D Estimated Tissue Size (mm2) (133)	Conduction Velocity (cm/s) - Q2 (7)	0	0.8935	0.000505409	0.595	0.000505409	0.225483
3D Estimated Tissue Size (mm2) (133)	Pharmacological Interventions - Propranolol (5)	0	0.6685	0.000570908	0.271	0.000570908	0.567031
3D Estimated Tissue Size (mm2) (133)	Contractile Analysis Method - TFM (8)	0	0.89	0.000595338	0.61	0.000595338	0.21467
3D Estimated Tissue Size (mm2) (133)	Induction Conditions - Specialised (5)	0	0.8935	0.000606801	0.547	0.000606801	0.262013
3D Estimated Tissue Size (mm2) (133)	Electrophysiology Analysis Method - Genetical (3)	0	0.6485	0.000651557	0.1805	0.000651557	0.743523
3D Estimated Tissue Size (mm2) (133)	hiPSC Backbone Media - Conditioned (12)	0	0.8995	0.000654995	0.551	0.000654995	0.258848
3D Estimated Tissue Size (mm2) (133)	Disease Modelling - HCM (6)	0	0.8785	0.000732324	0.4475	0.000732324	0.349207
3D Estimated Tissue Size (mm2) (133)	Differentiation Purity % - 60 to 69 (5)	0	0.639	0.000838268	0.11	0.000838268	0.958607
3D Estimated Tissue Size (mm2) (133)	Differentiation Purity % - <60 (9)	0	0.961	0.00137671	0.3365	0.00137671	0.473015
3D Estimated Tissue Size (mm2) (133)	Metabolic Analysis Method - Specialised (8)	0	0.969	0.00181377	0.1815	0.00181377	0.741123
Sarcomere Length (um) (64)	Sarcomere/Cellular Alignment Analysis (67)	0.0202391	0.0065	0.019331	0.0075	0.0197851	2.18709
Sarcomere Length (um) (64)	Pharmacological Interventions - Reported (141)	0.0150921	0.0275	0.00997262	0.0955	0.0125324	1.56067
Sarcomere Length (um) (64)	Beat Rate (beats per minute) Quantiles (54)	0.0140865	0.03	0.0168296	0.013	0.015458	1.88606
Sarcomere Length (um) (64)	Resting Membrane Potential (mV) - Reported (44)	0.0128328	0.026	0.00885834	0.0925	0.0108456	1.58503
Sarcomere Length (um) (64)	Induction Conditions - bFGF (45)	0.012771	0.002	0.00983042	0.0125	0.0113007	2.69897
Sarcomere Length (um) (64)	Beat Rate (beats per minute) - Reported (54)	0.0127139	0.011	0.0141027	0.008	0.0134083	2.09691
Sarcomere Length (um) (64)	AP Amplitude (mV) Quantiles (40)	0.012506	0.1	0.00824956	0.39	0.0103778	1
Sarcomere Length (um) (64)	Wnt Inhibitor - IWP (110)	0.0116335	0.063	0.00931878	0.103	0.0104761	1.20066
Sarcomere Length (um) (64)	Ancestry of hiPSC Lines - Known (71)	0.0114205	0.0485	0.0130009	0.027	0.0122107	1.56864
Sarcomere Length (um) (64)	AP Amplitude (mV) - Q4 (10)	0.0111844	0.0055	0.0137002	0.0035	0.0124423	2.45593
Sarcomere Length (um) (64)	Resting Membrane Potential (mV) Quantiles (44)	0.0109335	0.3155	0.00968028	0.408	0.0103069	0.501001
Sarcomere Length (um) (64)	2D Surface - Electrospun (13)	0.0104652	0	0.010372	0.001	0.0104186	3.30103
Sarcomere Length (um) (64)	Metabolic Maturation Strategy - Specialised (9)	0.0103788	0.006	0.00821087	0.022	0.00929483	2.22185
Sarcomere Length (um) (64)	Electrophysiology Analysis Method - Patch Clamp (55)	0.00993862	0.119	0.0131465	0.0435	0.0115426	1.36151
Sarcomere Length (um) (64)	hiPSC Backbone Media - mTeSR (102)	0.00966662	0.116	0.00469346	0.5445	0.00718004	0.935542
Sarcomere Length (um) (64)	Differentiation Purity % - 90 to 94 (37)	0.00952068	0.037	0.0102236	0.0225	0.00987212	1.64782
Sarcomere Length (um) (64)	Induction Conditions - Activin A (75)	0.00904103	0.117	0.00594519	0.3055	0.00749311	0.931814
Sarcomere Length (um) (64)	Force (mN) Quantiles (48)	0.00894578	0.27	0.00617309	0.5945	0.00755943	0.568636
Sarcomere Length (um) (64)	Upstroke Velocity (um/s) Quantiles (40)	0.00835577	0.4685	0.00563775	0.7905	0.00699676	0.32929
Sarcomere Length (um) (64)	Purification Stategy - Reported (101)	0.00821267	0.1945	0.00560886	0.4225	0.00691076	0.71108
Sarcomere Length (um) (64)	Pharmacological Interventions - Isoproterenol (70)	0.00799288	0.1555	0.00724858	0.1715	0.00762073	0.80827
Sarcomere Length (um) (64)	3D Tissue Media - B27 (67)	0.00792488	0.257	0.00555319	0.4615	0.00673903	0.590067
Sarcomere Length (um) (64)	Number of hiPSC Lines - 1 (218)	0.0078286	0.2085	0.00460518	0.552	0.00621689	0.680894
Sarcomere Length (um) (64)	3D Platform - Reported (154)	0.00782094	0.1855	0.00516711	0.443	0.00649403	0.731656
Sarcomere Length (um) (64)	Contractile Analysis Method - Motion Tracking (88)	0.00755775	0.1765	0.00408988	0.6	0.00582381	0.753255
Sarcomere Length (um) (64)	Pharmacological Interventions - Verapamil (27)	0.00726461	0.1215	0.00689236	0.133	0.00707849	0.915424
Sarcomere Length (um) (64)	3D Estimated Tissue Cell Density (10^6 cells/mL) Quantiles (120)	0.00703587	0.717	0.00581962	0.814	0.00642775	0.144481
Sarcomere Length (um) (64)	Electrophysiology Analysis Method - Microelectrode (29)	0.00701584	0.0225	0.00503631	0.091	0.00602608	1.64782
Sarcomere Length (um) (64)	hiPSC-CM Matrix Coating if Replated - Reported (152)	0.00698029	0.2465	0.00321752	0.7665	0.00509891	0.608183
Sarcomere Length (um) (64)	Differentiation Purity % - 95 to 100 (35)	0.00696478	0.119	0.00391625	0.419	0.00544052	0.924453
Sarcomere Length (um) (64)	hiPSC Line - WTC11 (30)	0.0068244	0.1025	0.00846893	0.051	0.00764667	1.29243
Sarcomere Length (um) (64)	Insulin Addition - Reported (175)	0.0068222	0.282	0.00581698	0.344	0.00631959	0.549751
Sarcomere Length (um) (64)	3D Tissue Media - RPMI-1640 (71)	0.00680719	0.319	0.00877162	0.1135	0.00778941	0.945004
Sarcomere Length (um) (64)	Metabolic Analysis Method - Seahorse (35)	0.00661183	0.281	0.00463736	0.48	0.00562459	0.551294
Sarcomere Length (um) (64)	Sex of hiPSC Lines - Known (116)	0.0064766	0.365	0.00590016	0.349	0.00618838	0.457175
Sarcomere Length (um) (64)	Electrophysiology Analysis Method - Reported (117)	0.00640986	0.342	0.00784875	0.1655	0.00712931	0.781202
Sarcomere Length (um) (64)	Differentiation Purity Assessment - Reported (167)	0.00623014	0.334	0.00609057	0.3135	0.00616035	0.503762
Sarcomere Length (um) (64)	3D Estimated Tissue Size (mm2) Q1 <0.28 (34)	0.00616221	0.1135	0.00657036	0.097	0.00636628	1.01323
Sarcomere Length (um) (64)	Contractile Analysis Method - Reported(163)	0.00612648	0.3675	0.00577248	0.3605	0.00594948	0.443095
Sarcomere Length (um) (64)	3D Platform - Scaffold Free (43)	0.00611375	0.0905	0.00389047	0.3025	0.00500211	1.04335
Sarcomere Length (um) (64)	3D % Confluency - 85 to 89 (12)	0.00610936	0.238	0.00374826	0.5565	0.00492881	0.623423
Sarcomere Length (um) (64)	Stress (mN/mm2) - Reported (37)	0.00597517	0.138	0.00361239	0.412	0.00479378	0.860121
Sarcomere Length (um) (64)	hiPSC-CM Matrix Coating if Replated - Matrigel (64)	0.00579414	0.3635	0.0052518	0.3785	0.00552297	0.439496
Sarcomere Length (um) (64)	2D % Confluency - 85 to 89 (31)	0.00573461	0.273	0.00389701	0.517	0.00481581	0.563837
Sarcomere Length (um) (64)	Induction Conditions - BMP4 (74)	0.00572337	0.41	0.00339419	0.7705	0.00455878	0.387216
Sarcomere Length (um) (64)	Wnt Inhibitor - XAV939 (23)	0.00569321	0.142	0.00441311	0.259	0.00505316	0.847712
Sarcomere Length (um) (64)	hiPSC-CM Matrix Coating if Replated - Geltrex (10)	0.0055969	0.0635	0.0042979	0.1575	0.0049474	1.19723
Sarcomere Length (um) (64)	Elastomeric Maturation (33)	0.0054908	0.185	0.00495083	0.232	0.00522081	0.732828
Sarcomere Length (um) (64)	hiPSC-CM Backbone Media - iCell Maintenance Medium (86)	0.00547376	0.36	0.00602633	0.2355	0.00575005	0.628009
Sarcomere Length (um) (64)	Transmission Electron Microscopy (62)	0.0054072	0.5265	0.00365333	0.7755	0.00453026	0.278602
Sarcomere Length (um) (64)	3D Tissue Media - Reported (157)	0.00540508	0.6095	0.00446885	0.6825	0.00493696	0.215026
Sarcomere Length (um) (64)	Insulin Addition - prior Day 8 (149)	0.00537777	0.5085	0.0042296	0.628	0.00480368	0.293709
Sarcomere Length (um) (64)	T-tubules Observed (18)	0.00534532	0.2895	0.00465263	0.345	0.00499897	0.538351
Sarcomere Length (um) (64)	3D CM % Composition - >74 (115)	0.00531919	0.511	0.00331038	0.7945	0.00431479	0.291579
Sarcomere Length (um) (64)	Calcium Handling Analysis Method - Dye (99)	0.00528645	0.5525	0.00394404	0.686	0.00461525	0.257668
Sarcomere Length (um) (64)	Induction Duration - Reported (230)	0.00521667	0.3525	0.0023857	0.828	0.00380119	0.452841
Sarcomere Length (um) (64)	Purification Duration - 4 days (28)	0.00514649	0.26	0.00546982	0.217	0.00530815	0.66354
Sarcomere Length (um) (64)	Wnt Inhibition Duration - 2 days (152)	0.00511107	0.525	0.00278905	0.8875	0.00395006	0.279841
Sarcomere Length (um) (64)	Time to Peak (ms) Quantiles (41)	0.00510153	0.8275	0.00842777	0.382	0.00676465	0.417937
Sarcomere Length (um) (64)	Differentiation Purity % - Reported (153)	0.00508705	0.544	0.00404395	0.6715	0.0045655	0.264401
Sarcomere Length (um) (64)	Amplitude (F/F0) Quantiles (50)	0.00508511	0.95	0.00733053	0.7385	0.00620782	0.13165
Sarcomere Length (um) (64)	Time to Peak (ms) - Reported (41)	0.00500793	0.43	0.00130541	0.9745	0.00315667	0.366532
Sarcomere Length (um) (64)	2D Surface - Micropatterned (24)	0.00495098	0.3105	0.00457032	0.352	0.00476065	0.507938
Sarcomere Length (um) (64)	hiPSC-CM Media Supplement - L-ascorbic acid (39)	0.00492543	0.283	0.00221252	0.77	0.00356898	0.548214
Sarcomere Length (um) (64)	Stress (mN/mm2) Quantiles (37)	0.00488161	0.524	0.00469742	0.5935	0.00478952	0.280669
Sarcomere Length (um) (64)	hiPSC-CM Matrix Coating if Replated - Fibronectin (32)	0.00475084	0.177	0.00926747	0.028	0.00700915	1.55284
Sarcomere Length (um) (64)	Upstroke Velocity (um/s) - Reported (40)	0.00474066	0.453	0.00217832	0.8815	0.00345949	0.343902
Sarcomere Length (um) (64)	3D Estimated Tissue Size (mm2) Quantiles (133)	0.00473055	0.8435	0.00475188	0.8395	0.00474122	0.0759793
Sarcomere Length (um) (64)	Wnt Inhibitor - IWR (54)	0.00457572	0.449	0.00394039	0.513	0.00425805	0.347754
Sarcomere Length (um) (64)	AP Conduction Velocity (cm/s) Quantiles (28)	0.00447781	0.6005	0.00710177	0.2525	0.00578979	0.597739
Sarcomere Length (um) (64)	hiPSC-CM Maintenance/Maturation Media (if different) - RPMI-1640 (26)	0.00445834	0.332	0.00358146	0.4895	0.0040199	0.478862
Sarcomere Length (um) (64)	Force (mN) - Q1 (13)	0.00443572	0.185	0.00259385	0.525	0.00351479	0.732828
Sarcomere Length (um) (64)	3D % Confluency - 2D/3D Values (154)	0.00437892	0.71	0.0063503	0.298	0.00536461	0.525784
Sarcomere Length (um) (64)	hiPSC-CM Backbone Media - RPMI-1640 (161)	0.00436529	0.6885	0.00281567	0.8635	0.00359048	0.162096
Sarcomere Length (um) (64)	3D Estimated Tissue Cell Density (10^6 cells/mL) Q3 >10.8 (40)	0.00435045	0.121	0.0041231	0.1545	0.00423678	0.917215
Sarcomere Length (um) (64)	hiPSC-CM Media Supplement - B27 (174)	0.00434115	0.7325	0.00635529	0.345	0.00534822	0.462181
Sarcomere Length (um) (64)	Cell Alignment Maturation (55)	0.00432017	0.4845	0.00320582	0.662	0.00376299	0.314706
Sarcomere Length (um) (64)	Purification Stategy - Glucose & Lactate (85)	0.00429098	0.747	0.00608781	0.348	0.0051894	0.458421
Sarcomere Length (um) (64)	hiPSC-CM Media Supplement - Reported (275)	0.00424915	0.136	0.00436389	0.135	0.00430652	0.869666
Sarcomere Length (um) (64)	Induction Duration - 1 days (99)	0.00421117	0.6925	0.00275753	0.878	0.00348435	0.15958
Sarcomere Length (um) (64)	Metabolic Maturation Strategy (Broad) - Signaling Pathway Regulators (6)	0.0042007	0.1595	0.00555546	0.0895	0.00487808	1.04818
Sarcomere Length (um) (64)	Gene Analysis Method - PCR (131)	0.00415483	0.7895	0.00275374	0.9205	0.00345429	0.102648
Sarcomere Length (um) (64)	3D SC % Composition - Reported (150)	0.00413823	0.724	0.00445497	0.611	0.0042966	0.213959
Sarcomere Length (um) (64)	Differentiation Purity Assessment - Flow Cytometry cTnT+ (134)	0.00412998	0.7225	0.00498116	0.489	0.00455557	0.310691
Sarcomere Length (um) (64)	Amplitude (F/F0) - Reported (50)	0.00412578	0.6955	0.00306451	0.8205	0.00359515	0.157703
Sarcomere Length (um) (64)	Other Cells Maturation (77)	0.00408046	0.566	0.00374483	0.569	0.00391264	0.247184
Sarcomere Length (um) (64)	hiPSC-CM Matrix Coating if Replated - Gelatin (43)	0.00407574	0.246	0.00454156	0.187	0.00430865	0.728158
Sarcomere Length (um) (64)	2D % Confluency - 2D/3D Values (154)	0.00407099	0.7925	0.00391571	0.716	0.00399335	0.145087
Sarcomere Length (um) (64)	Upstroke Velocity (um/s) - Q4 (9)	0.00403949	0.1035	0.00526855	0.0705	0.00465402	1.15181
Sarcomere Length (um) (64)	3D CM % Composition - Reported (150)	0.00402974	0.753	0.00254396	0.9175	0.00328685	0.123205
Sarcomere Length (um) (64)	3D Estimated Tissue Cell Density (10^6 cells/mL) Q1 <2.82 (40)	0.0040268	0.246	0.00231174	0.62	0.00316927	0.609065
Sarcomere Length (um) (64)	hiPSC Backbone Media - Essential 8 (82)	0.0040221	0.7075	0.00467248	0.5165	0.00434729	0.28693
Sarcomere Length (um) (64)	3D SC % Composition - <25 (120)	0.00399899	0.7955	0.0016463	0.982	0.00282265	0.0993598
Sarcomere Length (um) (64)	2D Surface - ECM-coated (114)	0.0039842	0.792	0.00553107	0.4105	0.00475763	0.386687
Sarcomere Length (um) (64)	Metabolic Maturation Strategy (Broad) - Metabolic Modulation (19)	0.00397219	0.4115	0.00240025	0.723	0.00318622	0.38563
Sarcomere Length (um) (64)	3D EC % Composition - Reported (150)	0.00391732	0.752	0.00294838	0.8335	0.00343285	0.123782
Sarcomere Length (um) (64)	Pharmacological Interventions - Cisapride (5)	0.00387326	0.022	0.00240116	0.1335	0.00313721	1.65758
Sarcomere Length (um) (64)	Pharmacological Interventions - E4031 (22)	0.00386059	0.0415	0.00442392	0.042	0.00414225	1.38195
Sarcomere Length (um) (64)	Calcium Handling Analysis Method - Reported (124)	0.0038589	0.743	0.00692072	0.1835	0.00538981	0.736364
Sarcomere Length (um) (64)	hiPSC Line - Cellapy (4)	0.00385764	0.013	0.00364171	0.031	0.00374968	1.88606
Sarcomere Length (um) (64)	Ancestry of hiPSC Lines - Asian (30)	0.00385428	0.439	0.00551124	0.186	0.00468276	0.730487
Sarcomere Length (um) (64)	AP Amplitude (mV) - Reported(40)	0.00377379	0.7055	0.00506902	0.3915	0.0044214	0.407268
Sarcomere Length (um) (64)	2D % Confluency - 95 to 100 (13)	0.00374879	0.3475	0.00481146	0.2115	0.00428013	0.67469
Sarcomere Length (um) (64)	Amplitude (F/F0) - Q3 (12)	0.00373916	0.256	0.00283896	0.4475	0.00328906	0.59176
Sarcomere Length (um) (64)	Induction Conditions - Reported (238)	0.00373801	0.4585	0.00387311	0.4335	0.00380556	0.363011
Sarcomere Length (um) (64)	Metabolic Maturation Strategy (Broad) - Fatty Acid and Lipids (19)	0.00368868	0.4365	0.00454325	0.2985	0.00411596	0.525056
Sarcomere Length (um) (64)	Time to Peak (ms) - Q2 (10)	0.00364109	0.2455	0.00200842	0.6185	0.00282475	0.609949
Sarcomere Length (um) (64)	Contractile Analysis Method - TFM (8)	0.00363451	0.0995	0.00366704	0.1235	0.00365078	1.00218
Sarcomere Length (um) (64)	3D Stromal Cell Type - Reported (77)	0.0036191	0.5655	0.0051072	0.284	0.00436315	0.546682
Sarcomere Length (um) (64)	Stress (mN/mm2) - Q4 (9)	0.00361379	0.0765	0.0024256	0.24	0.00301969	1.11634
Sarcomere Length (um) (64)	3D % Confluency - Reported (239)	0.00360294	0.347	0.00184248	0.786	0.00272271	0.459671
Sarcomere Length (um) (64)	hiPSC-CM Maintenance/Maturation Media (if different) - Reported (51)	0.0035535	0.7435	0.00477658	0.452	0.00416504	0.344862
Sarcomere Length (um) (64)	Wnt Inhibitor - Reported (227)	0.00348975	0.5265	0.00142306	0.912	0.00245641	0.278602
Sarcomere Length (um) (64)	Sex of hiPSC Lines - Male (64)	0.0034751	0.776	0.00439831	0.5485	0.0039367	0.260823
Sarcomere Length (um) (64)	Beat Rate (beats per minute) - Q2 (16)	0.00347018	0.064	0.00461767	0.0395	0.00404393	1.4034
Sarcomere Length (um) (64)	hiPSC Line - Specialised (121)	0.00344751	0.8575	0.00383981	0.7245	0.00364366	0.139962
Sarcomere Length (um) (64)	hiPSC Line - IMR90 (19)	0.0034264	0.4235	0.00176098	0.8115	0.00259369	0.373147
Sarcomere Length (um) (64)	Force (mN) - Reported (48)	0.00340497	0.708	0.00419014	0.508	0.00379756	0.294136
Sarcomere Length (um) (64)	hiPSC-CM Maintenance/Maturation Media (if different) - DMEM (11)	0.00336894	0.133	0.00477765	0.0665	0.0040733	1.17718
Sarcomere Length (um) (64)	hiPSC-CM Media Supplement - Specialised (13)	0.00331411	0.1805	0.00376242	0.1555	0.00353826	0.80827
Sarcomere Length (um) (64)	AP Conduction Velocity (cm/s) - Q4 (7)	0.00327524	0.089	0.00234119	0.2345	0.00280821	1.05061
Sarcomere Length (um) (64)	Purification Duration - Reported (88)	0.0032578	0.8765	0.00455559	0.588	0.00390669	0.230623
Sarcomere Length (um) (64)	Induction Conditions - CHIR99021 (174)	0.00325275	0.808	0.00617796	0.2675	0.00471536	0.572676
Sarcomere Length (um) (64)	3D SC % Composition - >24 (30)	0.00322948	0.1215	0.00311961	0.167	0.00317455	0.915424
Sarcomere Length (um) (64)	Disease Modelling - Reported (50)	0.0032269	0.6025	0.00372977	0.481	0.00347834	0.317855
Sarcomere Length (um) (64)	2D Surface - Reported (137)(177)	0.00319542	0.814	0.00453775	0.48	0.00386658	0.318759
Sarcomere Length (um) (64)	Metabolic Maturation Strategy - Reported (30)	0.00317102	0.748	0.00307733	0.726	0.00312418	0.139063
Sarcomere Length (um) (64)	Pharmacological Interventions - Doxorubicin (17)	0.00316154	0.0375	0.00311	0.0725	0.00313577	1.42597
Sarcomere Length (um) (64)	Pharmacological Interventions - Caffeine (4)	0.00315444	0.001	0.00380588	0	0.00348016	3.30103
Sarcomere Length (um) (64)	Mechanical Maturation (34)	0.00314755	0.3635	0.0033925	0.341	0.00327003	0.467246
Sarcomere Length (um) (64)	Ancestry of hiPSC Lines - Caucasian (42)	0.00314734	0.243	0.00289295	0.3335	0.00302014	0.614394
Sarcomere Length (um) (64)	2D Surface - Hydrogel (14)	0.00313057	0.202	0.002912	0.2655	0.00302128	0.694649
Sarcomere Length (um) (64)	3D CM % Composition - <75 (35)	0.00312681	0.134	0.00533048	0.037	0.00422864	1.4318
Sarcomere Length (um) (64)	Metabolic Maturation Strategy (Broad) - Specialised (4)	0.00310408	0.143	0.00443703	0.0695	0.00377055	1.15802
Sarcomere Length (um) (64)	hiPSC Backbone Media - Reported (228)	0.00306895	0.688	0.00617104	0.2005	0.00461999	0.697886
Sarcomere Length (um) (64)	Metabolic Maturation Strategy (Broad) - Known (30)	0.0030293	0.8025	0.00376622	0.615	0.00339776	0.211125
Sarcomere Length (um) (64)	hiPSC-CM Backbone Media - Commercial Cardiomyocyte Kit (12)	0.00300456	0.0735	0.00339871	0.081	0.00320164	1.13371
Sarcomere Length (um) (64)	3D % Confluency - 95 to 100 (15)	0.00300107	0.4675	0.00354992	0.3825	0.0032755	0.417369
Sarcomere Length (um) (64)	Purification Duration - 6 days (10)	0.00298675	0.3165	0.00259209	0.4465	0.00278942	0.499626
Sarcomere Length (um) (64)	Differentiation Purity % - 85 to 89 (24)	0.00298616	0.293	0.00754507	0.0275	0.00526561	1.56067
Sarcomere Length (um) (64)	hiPSC Line - PGP1 (11)	0.00298224	0.004	0.0019779	0.057	0.00248007	2.39794
Sarcomere Length (um) (64)	Disease Modelling - HCM (6)	0.00294722	0.111	0.00310146	0.1135	0.00302434	0.954677
Sarcomere Length (um) (64)	Gene Analysis Method - RNA (57)	0.00282799	0.928	0.00298351	0.88	0.00290575	0.0555173
Sarcomere Length (um) (64)	Measured Fatty Acid Metabolism (18)	0.00280701	0.524	0.00100714	0.926	0.00190707	0.280669
Sarcomere Length (um) (64)	3D Endothelial Cell Type - Reported (33)	0.00278483	0.1595	0.00178629	0.4	0.00228556	0.797239
Sarcomere Length (um) (64)	3D Platform - Collagen (37)	0.00277105	0.434	0.00262197	0.486	0.00269651	0.36251
Sarcomere Length (um) (64)	3D EC % Composition - <10 (120)	0.0027449	0.8885	0.00372629	0.669	0.00323559	0.174574
Sarcomere Length (um) (64)	Beat Rate (beats per minute) - Q1 (15)	0.00273018	0.0595	0.00379928	0.032	0.00326473	1.49485
Sarcomere Length (um) (64)	Disease Modelling - Left Ventricular (15)	0.00268571	0.418	0.00317534	0.3345	0.00293052	0.475604
Sarcomere Length (um) (64)	Wnt Inhibitor - Wnt-C59 (28)	0.00264992	0.4305	0.002128	0.598	0.00238896	0.366027
Sarcomere Length (um) (64)	Force (mN) - Q2 (12)	0.00263329	0.0825	0.00182017	0.2305	0.00222673	1.08355
Sarcomere Length (um) (64)	Conduction Velocity (cm/s) - Q1 (7)	0.00260151	0.1355	0.00138214	0.505	0.00199183	0.868061
Sarcomere Length (um) (64)	3D Tissue Media - DMEM (53)	0.00259314	0.3485	0.00274562	0.3385	0.00266938	0.470441
Sarcomere Length (um) (64)	Purification Duration - 5 days (6)	0.00255934	0.082	0.00187645	0.2365	0.00221789	1.08619
Sarcomere Length (um) (64)	Induction Duration - 2 days (71)	0.00250303	0.9335	0.00186906	0.9575	0.00218604	0.0298857
Sarcomere Length (um) (64)	2D % Confluency - 80 to 84 (4)	0.00243515	0.0065	0.00248978	0.013	0.00246246	2.18709
Sarcomere Length (um) (64)	hiPSC Backbone Media - Specialised (17)	0.00242145	0.0715	0.00312452	0.0585	0.00277299	1.23284
Sarcomere Length (um) (64)	Resting Membrane Potential (mV) - Q2 (13)	0.00241317	0.451	0.00240695	0.4615	0.00241006	0.345823
Sarcomere Length (um) (64)	Upstroke Velocity (um/s) - Q1 (10)	0.00234934	0.476	0.00136448	0.784	0.00185691	0.322393
Sarcomere Length (um) (64)	hiPSC-CM Backbone Media - DMEM (18)	0.00233397	0.1125	0.0033949	0.0665	0.00286444	1.17718
Sarcomere Length (um) (64)	hiPSC-CM Media Supplement - iCell Maintenance Medium (41)	0.00231006	0.205	0.000652446	0.8075	0.00148125	0.688246
Sarcomere Length (um) (64)	Force (mN) - Q3 (11)	0.00227076	0.3645	0.000118256	0.9765	0.00119451	0.438302
Sarcomere Length (um) (64)	Metabolic Maturation Strategy (Broad) - Hormonal Stimulation (15)	0.00223395	0.633	0.00216549	0.6615	0.00219972	0.198596
Sarcomere Length (um) (64)	Insulin Addition - Induction (172)	0.00216509	0.9695	0.00390237	0.6555	0.00303373	0.183427
Sarcomere Length (um) (64)	Scanning Electron Microscopy (21)	0.00212559	0.3365	0.00317437	0.2115	0.00264998	0.67469
Sarcomere Length (um) (64)	Beat Rate (beats per minute) - Q3 (10)	0.0021181	0.208	0.00142569	0.443	0.00177189	0.681937
Sarcomere Length (um) (64)	2D % Confluency - Reported (236)	0.0021145	0.733	0.00253506	0.635	0.00232478	0.197226
Sarcomere Length (um) (64)	Tension Maturation (64)	0.00209746	0.921	0.000348461	0.9995	0.00122296	0.0357404
Sarcomere Length (um) (64)	3D Estimated Tissue Cell Density (10^6 cells/mL) Q2 2.82 to 10.8 (40)	0.00207999	0.802	0.00117984	0.9425	0.00162991	0.0958256
Sarcomere Length (um) (64)	Conduction Velocity (cm/s) Quantiles (14)	0.00207428	0.4325	0.00128011	0.749	0.00167719	0.364014
Sarcomere Length (um) (64)	Sex of hiPSC Lines - Female (42)	0.00207134	0.669	0.00234887	0.6195	0.00221011	0.207959
Sarcomere Length (um) (64)	Metabolic Maturation Strategy (Broad) - Insulin and Related Components (3)	0.00206167	0.023	0.000254167	0.666	0.00115792	1.63827
Sarcomere Length (um) (64)	3D Stromal Cell Type - hCF (30)	0.00205318	0.42	0.00560122	0.058	0.0038272	1.23657
Sarcomere Length (um) (64)	Number of hiPSC Lines - 2 (50)	0.00204579	0.9065	0.00159273	0.948	0.00181926	0.0426322
Sarcomere Length (um) (64)	Wnt Inhibition Duration - Reported (222)	0.00203892	0.892	0.00269779	0.751	0.00236835	0.12436
Sarcomere Length (um) (64)	Differentiation Purity % - 80 to 84 (25)	0.00202746	0.73	0.00395461	0.284	0.00299103	0.546682
Sarcomere Length (um) (64)	hiPSC-CM Matrix Coating if Replated - Specialised (8)	0.00201915	0.2565	0.00189807	0.369	0.00195861	0.590913
Sarcomere Length (um) (64)	Time to Relaxation (ms) - Q1 (5)	0.00198042	0.3455	0.00123993	0.6215	0.00161018	0.461552
Sarcomere Length (um) (64)	Metabolic Maturation Strategy - Palmitic Acid (10)	0.00194485	0.554	0.00229083	0.5015	0.00211784	0.299729
Sarcomere Length (um) (64)	Gene Analysis Method - Reported (167)	0.0019374	0.9335	0.00319945	0.697	0.00256843	0.156767
Sarcomere Length (um) (64)	Differentiation Purity % - 70 to 74 (10)	0.00193557	0.397	0.00233324	0.347	0.0021344	0.459671
Sarcomere Length (um) (64)	Induction Conditions - Specialised (5)	0.00189229	0.041	0.00360312	0.0005	0.00274771	3.30103
Sarcomere Length (um) (64)	hiPSC-CM Backbone Media - Reported (301)	0.00187367	0.1555	0.00102595	0.4405	0.00144981	0.80827
Sarcomere Length (um) (64)	3D % Confluency - 90 to 94 (11)	0.00186633	0.426	0.000131258	0.969	0.000998792	0.37059
Sarcomere Length (um) (64)	Time to Peak (ms) - Q4 (10)	0.00184343	0.565	0.00182423	0.603	0.00183383	0.247952
Sarcomere Length (um) (64)	Amplitude (F/F0) - Q1 (13)	0.00180981	0.512	0.00356362	0.1735	0.00268671	0.760701
Sarcomere Length (um) (64)	hiPSC-CM Matrix Coating if Replated - Laminin (5)	0.00178483	0.1675	0.00264364	0.094	0.00221423	1.02687
Sarcomere Length (um) (64)	Amplitude (F/F0) - Q2 (13)	0.00177632	0.435	0.000441268	0.9095	0.00110879	0.361511
Sarcomere Length (um) (64)	Calcium Handling Analysis Method - Genetical (23)	0.00174173	0.317	0.00162389	0.3895	0.00168281	0.498941
Sarcomere Length (um) (64)	3D Platform - Decellularised (15)	0.00173662	0.1675	0.00212214	0.1595	0.00192938	0.797239
Sarcomere Length (um) (64)	hiPSC Backbone Media - Embryonic Stem Cell (20)	0.0017144	0.307	0.00058876	0.8245	0.00115158	0.512862
Sarcomere Length (um) (64)	AP Amplitude (mV) - Q1 (11)	0.00169506	0.6185	0.00283924	0.325	0.00226715	0.488117
Sarcomere Length (um) (64)	Induction Duration - 3 days (37)	0.0016917	0.9505	0.00139142	0.9635	0.00154156	0.0220479
Sarcomere Length (um) (64)	AP Amplitude (mV) - Q3 (9)	0.00168149	0.521	0.00176246	0.5285	0.00172197	0.283162
Sarcomere Length (um) (64)	AP Conduction Velocity (cm/s) - Reported (28)	0.00166509	0.8825	0.0029128	0.5885	0.00228895	0.230254
Sarcomere Length (um) (64)	hiPSC-CM Media Supplement - Albumin (23)	0.0016506	0.523	0.000895717	0.823	0.00127316	0.281498
Sarcomere Length (um) (64)	3D Estimated Tissue Size (mm2) Q3 4 to 20 (33)	0.00163679	0.6795	0.002611	0.4445	0.0021239	0.352128
Sarcomere Length (um) (64)	Beat Rate (beats per minute) - Q4 (13)	0.00155692	0.335	0.00147095	0.424	0.00151393	0.474955
Sarcomere Length (um) (64)	Electrical Maturation (38)	0.00155123	0.863	0.00509362	0.222	0.00332242	0.653647
Sarcomere Length (um) (64)	Sex of hiPSC Lines - Both (10)	0.00153261	0.7135	0.000978728	0.882	0.00125567	0.146606
Sarcomere Length (um) (64)	Electrophysiology Analysis Method - Optical Mapping (39)	0.00152267	0.7435	0.00568414	0.09	0.00360341	1.04576
Sarcomere Length (um) (64)	Metabolic Analysis Method - Reported (45)	0.00151484	0.976	0.00333082	0.7095	0.00242283	0.149048
Sarcomere Length (um) (64)	hiPSC Line - Cor.4U (16)	0.00151294	0.407	0.00185143	0.3565	0.00168219	0.44794
Sarcomere Length (um) (64)	Metabolic Maturation Strategy (Broad) - Thyroid Hormones (14)	0.00145038	0.773	0.00359745	0.286	0.00252392	0.543634
Sarcomere Length (um) (64)	Resting Membrane Potential (mV) - Q4 (9)	0.00144556	0.659	0.00214001	0.4735	0.00179278	0.32468
Sarcomere Length (um) (64)	2D % Confluency - 90 to 94 (10)	0.00140541	0.617	0.00174015	0.544	0.00157278	0.264401
Sarcomere Length (um) (64)	Pharmacological Interventions - Carbenoxolone (4)	0.0013444	0.072	0.00125676	0.13	0.00130058	1.14267
Sarcomere Length (um) (64)	hiPSC-CM Media Supplement - GlutaMax (8)	0.00133914	0.4105	0.000437216	0.8365	0.000888177	0.386687
Sarcomere Length (um) (64)	3D Platform - Fibrin (50)	0.00131993	0.9155	0.00418113	0.3215	0.00275053	0.492819
Sarcomere Length (um) (64)	Wnt Inhibition Duration - >6 days (12)	0.00130855	0.4775	0.00188425	0.3935	0.0015964	0.405055
Sarcomere Length (um) (64)	hiPSC-CM Media Supplement - FBS (16)	0.00130416	0.0755	0.00154814	0.077	0.00142615	1.12205
Sarcomere Length (um) (64)	hiPSC Line - DF19-9-11T.H (16)	0.00128622	0.8435	0.00291195	0.4045	0.00209908	0.393081
Sarcomere Length (um) (64)	hiPSC Backbone Media - Conditioned (12)	0.00128324	0.7685	0.00272174	0.372	0.00200249	0.429457
Sarcomere Length (um) (64)	AP Conduction Velocity (cm/s) - Q2 (8)	0.00126589	0.0975	0.00159747	0.085	0.00143168	1.07058
Sarcomere Length (um) (64)	Metabolic Maturation Strategy - Linoleic/Oleic Acid (4)	0.00125536	0.3255	0.000845439	0.5435	0.0010504	0.487449
Sarcomere Length (um) (64)	Differentiation Purity Assessment - IHC a-actinin (8)	0.00124505	0.266	0.00266996	0.0825	0.00195751	1.08355
Sarcomere Length (um) (64)	2D Surface - Nanotopography (6)	0.00122186	0.293	0.000657002	0.6305	0.000939433	0.533132
Sarcomere Length (um) (64)	3D EC % Composition - >9 (30)	0.00119997	0.5315	0.00130923	0.5225	0.0012546	0.281914
Sarcomere Length (um) (64)	Pharmacological Interventions - Epinephrine (10)	0.0011987	0.114	0.000464364	0.4365	0.000831532	0.943095
Sarcomere Length (um) (64)	3D Endothelial Cell Type - HUVEC (9)	0.00119708	0.39	0.000986016	0.523	0.00109155	0.408935
Sarcomere Length (um) (64)	3D % Confluency - 70 to 79 (4)	0.00116233	0.586	0.00267008	0.2215	0.0019162	0.654626
Sarcomere Length (um) (64)	Pharmacological Interventions - Specialised (16)	0.00115054	0.5485	0.000591587	0.8365	0.000871065	0.260823
Sarcomere Length (um) (64)	Number of hiPSC Lines - 4 (10)	0.0011247	0.499	0.00150336	0.424	0.00131403	0.372634
Sarcomere Length (um) (64)	Contractile Analysis Method - Force Transducer (26)	0.00106849	0.68	0.000335272	0.9295	0.000701879	0.167491
Sarcomere Length (um) (64)	Number of hiPSC Lines - >5 (8)	0.00106826	0.1295	0	0.669	0.00106826	0.88773
Sarcomere Length (um) (64)	Time to Relaxation (ms) Quantiles (10)	0.00104602	0.7745	0.00408418	0.1495	0.0025651	0.825359
Sarcomere Length (um) (64)	3D Stromal Cell Type - hMSC (12)	0.0010435	0.592	0.00108811	0.654	0.00106581	0.227678
Sarcomere Length (um) (64)	Disease Modelling - DCM (5)	0.000988975	0.423	0.000452169	0.713	0.000720572	0.37366
Sarcomere Length (um) (64)	hiPSC-CM Media Supplement - HEPES (16)	0.000986283	0.608	0.00034958	0.8875	0.000667932	0.216096
Sarcomere Length (um) (64)	hiPSC Line - iCell2 (8)	0.000960895	0.1605	0.000997167	0.235	0.000979031	0.794525
Sarcomere Length (um) (64)	Resting Membrane Potential (mV) - Q1 (11)	0.000949463	0.631	0.00133718	0.5345	0.00114332	0.272052
Sarcomere Length (um) (64)	Metabolic Maturation Strategy (Broad) - Sugar and Carbohydrates (7)	0.00094756	0.617	0.00194069	0.3115	0.00144412	0.506542
Sarcomere Length (um) (64)	Wnt Inhibition Duration - 3 days (17)	0.000937174	0.753	0.000668103	0.894	0.000802639	0.123205
Sarcomere Length (um) (64)	Differentiation Purity Assessment - IHC cTnT (7)	0.000932454	0.162	0.00115238	0.1725	0.00104242	0.790485
Sarcomere Length (um) (64)	3D Stromal Cell Type - SC (34)	0.000921274	0.84	0	0.9865	0.000921274	0.0757207
Sarcomere Length (um) (64)	Pharmacological Interventions - T3 (3)	0.000916374	0.3985	0.0003196	0.7995	0.000617987	0.399572
Sarcomere Length (um) (64)	Max Capture Rate (Hz) - Q2 (7)	0.000912189	0.4395	0.000418223	0.739	0.000665206	0.357041
Sarcomere Length (um) (64)	hiPSC Line - SCVI-273 (8)	0.000904915	0.2015	0	0.689	0.000904915	0.695725
Sarcomere Length (um) (64)	hiPSC-CM Media Supplement - Essential Lipids (6)	0.00086753	0.2195	0.00120978	0.1635	0.00103865	0.786482
Sarcomere Length (um) (64)	Time to Relaxation (ms) - Reported (10)	0.000856166	0.8125	0.000177427	0.9735	0.000516796	0.0901766
Sarcomere Length (um) (64)	Number of hiPSC Lines - 3 (27)	0.000850997	0.98	0.00151779	0.895	0.00118439	0.048177
Sarcomere Length (um) (64)	Induction Duration - 5 days (8)	0.000837635	0.4595	0.000698894	0.626	0.000768265	0.337714
Sarcomere Length (um) (64)	Purification Duration - 3 days (12)	0.000829612	0.4815	0.00215104	0.166	0.00149032	0.779892
Sarcomere Length (um) (64)	AP Conduction Velocity (cm/s) - Q1 (7)	0.000805493	0.6645	0.000782204	0.748	0.000793849	0.177505
Sarcomere Length (um) (64)	Time to Peak (ms) - Q3 (10)	0.000789927	0.4915	0.0014328	0.271	0.00111136	0.567031
Sarcomere Length (um) (64)	Resting Membrane Potential (mV) - Q3 (11)	0.000787075	0.8405	0.00272996	0.262	0.00175852	0.581699
Sarcomere Length (um) (64)	hiPSC-CM Media Supplement - L-glutamine (19)	0.000784367	0.809	0.00125109	0.68	0.00101773	0.167491
Sarcomere Length (um) (64)	3D Estimated Tissue Size (mm2) Q2 0.28 to 4 (34)	0.000784274	0.8445	0.00143732	0.647	0.0011108	0.189096
Sarcomere Length (um) (64)	hiPSC Line - iCell (46)	0.000753961	0.8055	0.000839942	0.808	0.000796951	0.0939345
Sarcomere Length (um) (64)	Time to Peak (ms) - Q1 (11)	0.000750988	0.7505	0.000648613	0.833	0.000699801	0.124649
Sarcomere Length (um) (64)	Metabolic Maturation Strategy - T3 (14)	0.000739718	0.9185	0.000408953	0.9635	0.000574336	0.0369208
Sarcomere Length (um) (64)	Max Capture Rate (Hz) Quantiles (15)	0.000730774	0.5275	0	0.8645	0.000730774	0.277778
Sarcomere Length (um) (64)	Differentiation Purity Assessment - Flow Cytometry SIRPA+ (4)	0.000729921	0.536	0	0.8675	0.000729921	0.270835
Sarcomere Length (um) (64)	Upstroke Velocity (um/s) - Q2 (10)	0.000723433	0.4835	0.000318784	0.785	0.000521108	0.315604
Sarcomere Length (um) (64)	Disease Modelling - Arrhythmogenic Cardiomyopathy (10)	0.000723216	0.538	0.000317318	0.8215	0.000520267	0.269218
Sarcomere Length (um) (64)	hiPSC-CM Media Supplement - Polyvinylalchohol (6)	0.000714698	0.241	0.00138266	0.1345	0.00104868	0.871278
Sarcomere Length (um) (64)	hiPSC Line - Gibco episomal (10)	0.000698109	0.5605	0.000282606	0.843	0.000490357	0.251424
Sarcomere Length (um) (64)	Differentiation Purity Assessment - Flow Cytometry VCAM1+ (4)	0.000668724	0.2965	0.000334641	0.573	0.000501682	0.527975
Sarcomere Length (um) (64)	Metabolic Analysis Method - Specialised (8)	0.000656412	0.7835	0	0.959	0.000656412	0.105961
Sarcomere Length (um) (64)	Metabolic Maturation Strategy (Broad) - Serum and Serum Replacements (3)	0.000649922	0.2875	0.000615537	0.3625	0.000632729	0.541362
Sarcomere Length (um) (64)	Metabolic Maturation Strategy - IGF-1 (3)	0.000646479	0.28	0.000612842	0.386	0.000629661	0.552842
Sarcomere Length (um) (64)	Differentiation Purity Assessment - Flow Cytometry a-actinin+ (9)	0.000645086	0.5405	0.000647116	0.625	0.000646101	0.267204
Sarcomere Length (um) (64)	Differentiation Purity % - 60 to 69 (5)	0.000624098	0.264	0.000416772	0.4505	0.000520435	0.578396
Sarcomere Length (um) (64)	3D Tissue Media - MEM-α (6)	0.000608686	0.2925	0	0.675	0.000608686	0.533874
Sarcomere Length (um) (64)	Metabolic Maturation Strategy (Broad) - Glucocorticoids (7)	0.000605021	0.527	0.000707324	0.538	0.000656173	0.278189
Sarcomere Length (um) (64)	2D Surface - Decellularized ECM (3)	0.00060486	0.29	0.00123075	0.131	0.000917803	0.882729
Sarcomere Length (um) (64)	hiPSC Backbone Media - StemFlex (5)	0.000602429	0.5485	0.00189289	0.18	0.00124766	0.744727
Sarcomere Length (um) (64)	Amplitude (F/F0) - Q4 (12)	0.000601201	0.8545	0.00144017	0.62	0.00102068	0.207608
Sarcomere Length (um) (64)	Calcium Handling Analysis Method - Specialised (3)	0.000579981	0.5915	0.001476	0.2775	0.00102799	0.556737
Sarcomere Length (um) (64)	Metabolic Maturation Strategy (Broad) - Growth Factors (4)	0.000565408	0.643	0.000849105	0.553	0.000707257	0.257275
Sarcomere Length (um) (64)	Upstroke Velocity (um/s) - Q3 (11)	0.000562451	0.8745	0.00132236	0.6435	0.000942405	0.191451
Sarcomere Length (um) (64)	Pharmacological Interventions - Blebbistatin (5)	0.00055731	0.3595	0.00234394	0.021	0.00145062	1.67778
Sarcomere Length (um) (64)	Metabolic Maturation (30)	0.000544949	0.9975	0.00234405	0.844	0.0014445	0.0736576
Sarcomere Length (um) (64)	Conduction Velocity (cm/s) - Reported (14)	0.000540648	0.877	0.00181963	0.4745	0.00118014	0.323764
Sarcomere Length (um) (64)	AP Conduction Velocity (cm/s) - Q3 (6)	0.00053789	0.6515	0.000237389	0.863	0.000387639	0.186086
Sarcomere Length (um) (64)	Disease Modelling - Arrhythmic (15)	0.000531475	0.774	0.000666608	0.774	0.000599042	0.111259
Sarcomere Length (um) (64)	Stress (mN/mm2) - Q3 (9)	0.000531341	0.62	0.000334945	0.785	0.000433143	0.207608
Sarcomere Length (um) (64)	Wnt Inhibitor - VEGF (3)	0.000530989	0.3495	0.000515475	0.393	0.000523232	0.456553
Sarcomere Length (um) (64)	Metabolic Maturation Strategy - Vitamin B12 (3)	0.000520126	0.3375	0.000470727	0.473	0.000495426	0.471726
Sarcomere Length (um) (64)	Wnt Inhibition Duration - 5 days (6)	0.000514954	0.812	0.00113471	0.631	0.000824833	0.199971
Sarcomere Length (um) (64)	Wnt Inhibitor - Others (9)	0.000506179	0.337	0	0.652	0.000506179	0.47237
Sarcomere Length (um) (64)	hiPSC-CM Media Supplement - Lipid Mix (5)	0.000496267	0.4325	0.000436183	0.4725	0.000466225	0.364014
Sarcomere Length (um) (64)	hiPSC-CM Media Supplement - VEGF (4)	0.000484937	0.4205	0.000330233	0.5785	0.000407585	0.376234
Sarcomere Length (um) (64)	3D Tissue Media - iCell Maintenance Medium (12)	0.000480817	0.423	0.000760666	0.318	0.000620741	0.497573
Sarcomere Length (um) (64)	hiPSC-CM Backbone Media - IMDM/E8/BPEL/APEL (8)	0.000465366	0.4115	0.000472551	0.4385	0.000468958	0.38563
Sarcomere Length (um) (64)	Contractile Analysis Method - Post Deflection (39)	0.000458041	0.999	0.000214982	0.9985	0.000336512	0.000651931
Sarcomere Length (um) (64)	Metabolic Maturation Strategy - Insulin-Transferrin-Selenium (3)	0.000438945	0.4295	0.000512509	0.432	0.000475727	0.367037
Sarcomere Length (um) (64)	hiPSC-CM Maintenance/Maturation Media (if different) - Specialised (8)	0.000430348	0.392	0	0.6375	0.000430348	0.406714
Sarcomere Length (um) (64)	3D Estimated Tissue Size (mm2) Q3 >20 (32)	0.000412968	0.9615	0.00118638	0.816	0.000799673	0.0883098
Sarcomere Length (um) (64)	Conduction Velocity (cm/s) - Q2 (7)	0.000407875	0.4365	0.000678804	0.379	0.00054334	0.421361
Sarcomere Length (um) (64)	Extracellular Matrix Maturation (18)	0.000395468	0.937	0.00208825	0.4225	0.00124186	0.374173
Sarcomere Length (um) (64)	hiPSC Line - BJ1 (7)	0.000393172	0.8735	0.00104048	0.6435	0.000716825	0.191451
Sarcomere Length (um) (64)	Time to Relaxation (ms) - Q2 (5)	0.000391261	0.4955	0.00051354	0.4405	0.000452401	0.356054
Sarcomere Length (um) (64)	Purification Duration - >9 days (5)	0.000380339	0.5125	0.000911994	0.251	0.000646167	0.600326
Sarcomere Length (um) (64)	Metabolic Maturation Strategy - Lactate (4)	0.000368392	0.745	0.000407436	0.7145	0.000387914	0.145998
Sarcomere Length (um) (64)	hiPSC-CM Maintenance/Maturation Media (if different) - DMEM/F12 (6)	0.000368321	0.4625	0.00158357	0.0695	0.000975945	1.15802
Sarcomere Length (um) (64)	Purification Duration - <3 days (17)	0.000367604	0.7635	0.00213923	0.1635	0.00125342	0.786482
Sarcomere Length (um) (64)	hiPSC Line - 253G1 (10)	0.000362077	0.4835	0.00123617	0.1575	0.000799121	0.802719
Sarcomere Length (um) (64)	Metabolic Maturation Strategy (Broad) - Vitamins and Minerals (3)	0.000359915	0.475	0.000868111	0.254	0.000614013	0.595166
Sarcomere Length (um) (64)	Pharmacological Interventions - Phenylephrine (3)	0.000356896	0.77	0.000339137	0.813	0.000348016	0.113509
Sarcomere Length (um) (64)	hiPSC-CM Backbone Media - StemPro-34 (14)	0.000344693	0.7705	0	0.8885	0.000344693	0.113227
Sarcomere Length (um) (64)	Metabolic Maturation Strategy - Creatine (3)	0.000330462	0.5265	0	0.678	0.000330462	0.278602
Sarcomere Length (um) (64)	Contractile Analysis Method - Specialised (6)	0.00032714	0.743	0.00154346	0.2265	0.000935302	0.644932
Sarcomere Length (um) (64)	2D % Confluency - 70 to 79 (5)	0.00032693	0.8795	0.000352216	0.9135	0.000339573	0.0557642
Sarcomere Length (um) (64)	Metabolic Maturation Strategy (Broad) - Kinase Inhibitors (3)	0.000325733	0.891	0	0.9505	0.000325733	0.0501223
Sarcomere Length (um) (64)	Stress (mN/mm2) - Q2 (9)	0.000298865	0.921	0.00174072	0.4135	0.00101979	0.383524
Sarcomere Length (um) (64)	hiPSC Backbone Media - Differentiation (1)	0.000287237	0.566	0.000212729	0.6295	0.000249983	0.247184
Sarcomere Length (um) (64)	hiPSC-CM Backbone Media - Cor.4U Complete Medium (6)	0.000279672	0.561	0.00085115	0.2795	0.000565411	0.553618
Sarcomere Length (um) (64)	3D Stromal Cell Type - hDF (7)	0.00027772	0.5735	0.000173637	0.6815	0.000225679	0.241467
Sarcomere Length (um) (64)	3D % Confluency - 80 to 84 (6)	0.000276338	0.5765	0.00163521	0.0895	0.000955776	1.04818
Sarcomere Length (um) (64)	3D Platform - Matrigel (32)	0.000275906	0.9765	0.00164738	0.646	0.000961644	0.189767
Sarcomere Length (um) (64)	Purification Stategy - Cell Sorting (7)	0.000273317	0.5785	0.000253779	0.667	0.000263548	0.237697
Sarcomere Length (um) (64)	Pharmacological Interventions - Carbamylcholine (6)	0.000220648	0.565	0.000403735	0.47	0.000312191	0.327902
Sarcomere Length (um) (64)	Disease Modelling - Genetic Disorders (23)	0.000212026	0.913	0.00100307	0.617	0.000607547	0.209715
Sarcomere Length (um) (64)	Metabolic Maturation Strategy - Galactose (3)	0.000210169	0.5855	0.00025098	0.6565	0.000230574	0.232473
Sarcomere Length (um) (64)	Purification Stategy - Media (6)	0.000183332	0.5765	0.000420105	0.432	0.000301719	0.364516
Sarcomere Length (um) (64)	Metabolic Maturation Strategy - Ascorbic Acid (3)	0.000169076	0.6245	0.000373357	0.5755	0.000271216	0.239955
Sarcomere Length (um) (64)	3D Tissue Media - EGM2 (6)	0.000158162	0.6185	0.000196158	0.676	0.00017716	0.20866
Sarcomere Length (um) (64)	Pharmacological Interventions - Propranolol (5)	0.000129096	0.5965	0.000164991	0.666	0.000147043	0.22439
Sarcomere Length (um) (64)	Purification Duration - 8 days (4)	9.18668e-05	0.633	0.000737803	0.3515	0.000414835	0.454075
Sarcomere Length (um) (64)	Metabolic Maturation Strategy - Nonessential Amino Acids (3)	7.59602e-05	0.623	0	0.6585	7.59602e-05	0.205512
Sarcomere Length (um) (64)	Metabolic Maturation Strategy (Broad) - Structural and Functional Protein (5)	7.55812e-05	0.6415	0	0.6865	7.55812e-05	0.192803
Sarcomere Length (um) (64)	Wnt Inhibitor - DS-I-7 (11)	0	0.5835	3.9653e-05	0.65	3.9653e-05	0.233959
Sarcomere Length (um) (64)	Disease Modelling - Long QT Syndrome (3)	0	0.621	0.000240783	0.605	0.000240783	0.218245
Sarcomere Length (um) (64)	Metabolic Maturation Strategy - Biotin (3)	0	0.6455	0.000271715	0.638	0.000271715	0.195179
Sarcomere Length (um) (64)	Metabolic Maturation Strategy - Dexamethasone (7)	0	0.8325	0.000306478	0.783	0.000306478	0.106238
Sarcomere Length (um) (64)	hiPSC Line - BJ RiPS (4)	0	0.8465	0.000334536	0.803	0.000334536	0.0952845
Sarcomere Length (um) (64)	3D Stromal Cell Type - hiPSC-CF (8)	0	0.644	0.000395431	0.5895	0.000395431	0.229516
Sarcomere Length (um) (64)	hiPSC-CM Maintenance/Maturation Media (if different) - Modified Essential Medium (1)	0	0.6155	0.000418744	0.465	0.000418744	0.332547
Sarcomere Length (um) (64)	3D Stromal Cell Type - Specialised (11)	0	0.6345	0.000431165	0.4895	0.000431165	0.310247
Sarcomere Length (um) (64)	CM Immunofluorescent Imaging (261)	0	0.8805	0.000701422	0.6135	0.000701422	0.212185
Sarcomere Length (um) (64)	2D % Confluency - EB (13)	0	0.618	0.0007989	0.309	0.0007989	0.510042
Sarcomere Length (um) (64)	3D Platform - Polyethylene Glycol (8)	0	0.8775	0.000802408	0.5935	0.000802408	0.226579
Sarcomere Length (um) (64)	hiPSC Backbone Media - DMEM (10)	0	0.8445	0.000833884	0.514	0.000833884	0.289037
Sarcomere Length (um) (64)	AP Amplitude (mV) - Q2 (10)	0	0.849	0.000863002	0.5145	0.000863002	0.288615
Sarcomere Length (um) (64)	hiPSC-CM Media Supplement - 1-thioglycerol (14)	0	0.842	0.000957063	0.482	0.000957063	0.316953
Sarcomere Length (um) (64)	Insulin Addition - after Day 7 (26)	0	0.9745	0.00112109	0.746	0.00112109	0.127261
Sarcomere Length (um) (64)	3D Endothelial Cell Type - hiPSC-EC (16)	0	0.66	0.00125931	0.186	0.00125931	0.730487
Sarcomere Length (um) (64)	Max Capture Rate (Hz) - Reported (15)	0	0.866	0.00156237	0.292	0.00156237	0.534617
Sarcomere Length (um) (64)	Disease Modelling - Metabolic Disorders (4)	0	0.638	0.00167405	0.0955	0.00167405	1.02
Sarcomere Length (um) (64)	Metabolic Maturation Strategy (Broad) - Nutrition and Supplements (6)	0	0.8615	0.00191987	0.1895	0.00191987	0.722391
Force (mN) (48)	Number of hiPSC Lines - 1 (218)	0.0209492	0.0105	0.0181823	0.012	0.0195658	1.97881
Force (mN) (48)	Contractile Analysis Method - Force Transducer (26)	0.0174246	0.007	0.011568	0.038	0.0144963	2.1549
Force (mN) (48)	3D Estimated Tissue Size (mm2) Quantiles (133)	0.0169461	0.1545	0.0162776	0.1275	0.0166118	0.89449
Force (mN) (48)	3D Tissue Media - DMEM (53)	0.0168707	0.029	0.0216556	0.0015	0.0192631	2.82391
Force (mN) (48)	3D Estimated Tissue Cell Density (10^6 cells/mL) Q2 2.82 to 10.8 (40)	0.0159478	0.0365	0.00705384	0.365	0.0115008	1.43771
Force (mN) (48)	3D Platform - Reported (154)	0.0154517	0.002	0.0105977	0.018	0.0130247	2.69897
Force (mN) (48)	3D CM % Composition - <75 (35)	0.0147445	0.004	0.0102259	0.02	0.0124852	2.39794
Force (mN) (48)	Gene Analysis Method - Reported (167)	0.0141095	0.096	0.0118431	0.116	0.0129763	1.01773
Force (mN) (48)	3D SC % Composition - <25 (120)	0.0132649	0.0585	0.00855962	0.186	0.0109123	1.23284
Force (mN) (48)	Number of hiPSC Lines - 3 (27)	0.0125851	0.0055	0.0096846	0.017	0.0111348	2.25964
Force (mN) (48)	3D Estimated Tissue Size (mm2) Q3 >20 (32)	0.0122352	0.051	0.0131245	0.023	0.0126799	1.63827
Force (mN) (48)	3D Estimated Tissue Size (mm2) Q3 4 to 20 (33)	0.0113997	0.145	0.0106521	0.1135	0.0110259	0.945004
Force (mN) (48)	3D CM % Composition - >74 (115)	0.0108366	0.104	0.0109522	0.0715	0.0108944	1.14569
Force (mN) (48)	Gene Analysis Method - PCR (131)	0.0104106	0.1735	0.00582921	0.515	0.00811993	0.760701
Force (mN) (48)	3D EC % Composition - <10 (120)	0.0103709	0.072	0.0092215	0.089	0.00979619	1.14267
Force (mN) (48)	Upstroke Velocity (um/s) - Reported (40)	0.0103483	0.0765	0.0092384	0.0815	0.00979334	1.11634
Force (mN) (48)	hiPSC-CM Backbone Media - RPMI-1640 (161)	0.0102336	0.1315	0.00641923	0.3425	0.00832641	0.881074
Force (mN) (48)	3D Estimated Tissue Cell Density (10^6 cells/mL) Quantiles (120)	0.0101943	0.717	0.0124564	0.4175	0.0113254	0.379344
Force (mN) (48)	Calcium Handling Analysis Method - Reported (124)	0.0101457	0.1465	0.00703122	0.314	0.00858847	0.834162
Force (mN) (48)	2D Surface - Reported (137)(177)	0.00961383	0.1605	0.0115972	0.0575	0.0106055	1.24033
Force (mN) (48)	3D % Confluency - Reported (239)	0.00927398	0.2525	0.00824344	0.2375	0.00875871	0.624336
Force (mN) (48)	Differentiation Purity Assessment - Reported (167)	0.00927081	0.1145	0.00783605	0.149	0.00855343	0.941195
Force (mN) (48)	3D Tissue Media - B27 (67)	0.008812	0.1845	0.00698133	0.272	0.00789667	0.734004
Force (mN) (48)	hiPSC Backbone Media - Specialised (17)	0.00868721	0.067	0.0106243	0.0295	0.00965577	1.53018
Force (mN) (48)	3D Stromal Cell Type - Reported (77)	0.00845648	0.2875	0.00555914	0.519	0.00700781	0.541362
Force (mN) (48)	Beat Rate (beats per minute) - Reported (54)	0.00832703	0.0195	0.00961297	0.0125	0.00897	1.90309
Force (mN) (48)	3D Platform - Fibrin (50)	0.00810947	0.2135	0.00529106	0.4595	0.00670026	0.670602
Force (mN) (48)	Ancestry of hiPSC Lines - Known (71)	0.0080158	0.295	0.00572221	0.436	0.00686901	0.530178
Force (mN) (48)	Calcium Handling Analysis Method - Dye (99)	0.00797276	0.269	0.00958256	0.1085	0.00877766	0.96457
Force (mN) (48)	hiPSC Backbone Media - Essential 8 (82)	0.00787014	0.254	0.00462107	0.585	0.0062456	0.595166
Force (mN) (48)	Pharmacological Interventions - Reported (141)	0.00770711	0.347	0.00780345	0.2555	0.00775528	0.592609
Force (mN) (48)	Time to Peak (ms) - Reported (41)	0.00763826	0.214	0.00530455	0.4035	0.00647141	0.669586
Force (mN) (48)	Stress (mN/mm2) Quantiles (37)	0.00761906	0.4415	0.00985971	0.211	0.00873939	0.675718
Force (mN) (48)	Contractile Analysis Method - Post Deflection (39)	0.00754644	0.3575	0.00573538	0.4995	0.00664091	0.446724
Force (mN) (48)	Stress (mN/mm2) - Reported (37)	0.00735389	0.2835	0.0070316	0.2535	0.00719275	0.596022
Force (mN) (48)	Differentiation Purity Assessment - Flow Cytometry cTnT+ (134)	0.0073058	0.2735	0.0062066	0.331	0.0067562	0.563043
Force (mN) (48)	3D Tissue Media - Reported (157)	0.00720141	0.274	0.0113081	0.042	0.00925476	1.37675
Force (mN) (48)	hiPSC-CM Backbone Media - DMEM (18)	0.00714537	0.0125	0.00404964	0.143	0.00559751	1.90309
Force (mN) (48)	3D SC % Composition - >24 (30)	0.00684065	0.1455	0.00370456	0.5125	0.0052726	0.837137
Force (mN) (48)	Other Cells Maturation (77)	0.00673628	0.496	0.00511852	0.6045	0.0059274	0.304518
Force (mN) (48)	Upstroke Velocity (um/s) Quantiles (40)	0.00662472	0.6045	0.00799785	0.4445	0.00731129	0.352128
Force (mN) (48)	2D % Confluency - 2D/3D Values (154)	0.00662021	0.475	0.00536446	0.5395	0.00599234	0.323306
Force (mN) (48)	Purification Stategy - Reported (101)	0.0066127	0.48	0.00494207	0.6335	0.00577738	0.318759
Force (mN) (48)	hiPSC-CM Media Supplement - B27 (174)	0.00659461	0.4295	0.00552042	0.4755	0.00605751	0.367037
Force (mN) (48)	3D Platform - Collagen (37)	0.0064733	0.433	0.00395446	0.719	0.00521388	0.363512
Force (mN) (48)	Pharmacological Interventions - Isoproterenol (70)	0.00642849	0.403	0.00658546	0.323	0.00650698	0.490797
Force (mN) (48)	Purification Duration - 4 days (28)	0.00640144	0.2115	0.00589934	0.242	0.00615039	0.67469
Force (mN) (48)	Wnt Inhibitor - IWP (110)	0.00639501	0.503	0.00279994	0.917	0.00459747	0.298432
Force (mN) (48)	hiPSC-CM Media Supplement - FBS (16)	0.00627794	0.061	0.00516054	0.147	0.00571924	1.21467
Force (mN) (48)	Disease Modelling - Reported (50)	0.00623789	0.3185	0.00601303	0.2955	0.00612546	0.529443
Force (mN) (48)	hiPSC Line - PGP1 (11)	0.00620829	0.024	0.0039458	0.173	0.00507705	1.61979
Force (mN) (48)	3D Tissue Media - RPMI-1640 (71)	0.00616578	0.462	0.00375246	0.7675	0.00495912	0.335358
Force (mN) (48)	Tension Maturation (64)	0.00602398	0.5115	0.00918738	0.133	0.00760568	0.876148
Force (mN) (48)	Beat Rate (beats per minute) Quantiles (54)	0.0059351	0.0915	0.00443668	0.3035	0.00518589	1.03858
Force (mN) (48)	hiPSC Line - IMR90 (19)	0.00580399	0.102	0.00587994	0.117	0.00584197	0.9914
Force (mN) (48)	AP Conduction Velocity (cm/s) Quantiles (28)	0.00576088	0.3275	0.00452046	0.553	0.00514067	0.484789
Force (mN) (48)	Sex of hiPSC Lines - Female (42)	0.00573645	0.228	0.0042555	0.425	0.00499597	0.642065
Force (mN) (48)	2D Surface - Micropatterned (24)	0.00568193	0.275	0.00376768	0.5435	0.0047248	0.560667
Force (mN) (48)	hiPSC Line - Specialised (121)	0.00564054	0.6795	0.00281031	0.9345	0.00422542	0.167811
Force (mN) (48)	3D CM % Composition - Reported (150)	0.00560111	0.318	0.00300585	0.744	0.00430348	0.497573
Force (mN) (48)	Time to Peak (ms) Quantiles (41)	0.00553784	0.726	0.00444098	0.8835	0.00498941	0.139063
Force (mN) (48)	Insulin Addition - Reported (175)	0.00543164	0.3025	0.00577331	0.2415	0.00560248	0.617083
Force (mN) (48)	Differentiation Purity % - 85 to 89 (24)	0.00540494	0.368	0.0040785	0.5995	0.00474172	0.434152
Force (mN) (48)	3D Stromal Cell Type - hCF (30)	0.0053933	0.0835	0.00549578	0.1075	0.00544454	1.07831
Force (mN) (48)	Elastomeric Maturation (33)	0.00536372	0.2355	0.00662268	0.131	0.0059932	0.882729
Force (mN) (48)	Ancestry of hiPSC Lines - Caucasian (42)	0.00530479	0.4015	0.00622306	0.2595	0.00576393	0.585863
Force (mN) (48)	Insulin Addition - Induction (172)	0.00530427	0.3985	0.00311725	0.718	0.00421076	0.399572
Force (mN) (48)	3D Stromal Cell Type - hMSC (12)	0.00517293	0.118	0.00602149	0.0875	0.00559721	1.05799
Force (mN) (48)	Purification Stategy - Glucose & Lactate (85)	0.00506217	0.706	0.00506802	0.6225	0.00506509	0.205861
Force (mN) (48)	2D % Confluency - Reported (236)	0.0050543	0.6735	0.00452299	0.681	0.00478864	0.171662
Force (mN) (48)	Resting Membrane Potential (mV) Quantiles (44)	0.00499888	0.712	0.00405126	0.867	0.00452507	0.14752
Force (mN) (48)	Electrical Maturation (38)	0.00493155	0.5225	0.00436514	0.5685	0.00464834	0.281914
Force (mN) (48)	Induction Duration - 3 days (37)	0.00490238	0.5405	0.00373021	0.692	0.00431629	0.267204
Force (mN) (48)	3D EC % Composition - Reported (150)	0.00485723	0.3915	0.00657096	0.184	0.00571409	0.735182
Force (mN) (48)	3D Platform - Decellularised (15)	0.00480609	0.1915	0.00236958	0.692	0.00358784	0.717831
Force (mN) (48)	Sex of hiPSC Lines - Known (116)	0.00473125	0.792	0.00560757	0.552	0.00516941	0.258061
Force (mN) (48)	Differentiation Purity % - 90 to 94 (37)	0.00466742	0.4305	0.00467133	0.408	0.00466938	0.38934
Force (mN) (48)	hiPSC-CM Maintenance/Maturation Media (if different) - Reported (51)	0.00460046	0.49	0.00277962	0.785	0.00369004	0.309804
Force (mN) (48)	Differentiation Purity % - Reported (153)	0.00449758	0.6815	0.00429216	0.661	0.00439487	0.179799
Force (mN) (48)	hiPSC-CM Media Supplement - Lipid Mix (5)	0.0044915	0.0475	0.00391828	0.0925	0.00420489	1.32331
Force (mN) (48)	Amplitude (F/F0) Quantiles (50)	0.00439259	0.842	0.00459941	0.857	0.004496	0.0746879
Force (mN) (48)	Time to Relaxation (ms) - Reported (10)	0.00438607	0.0585	0.00288862	0.267	0.00363735	1.23284
Force (mN) (48)	hiPSC-CM Media Supplement - HEPES (16)	0.00438069	0.4985	0.00270548	0.79	0.00354309	0.302335
Force (mN) (48)	Differentiation Purity % - 80 to 84 (25)	0.00432374	0.2975	0.00729745	0.0935	0.0058106	1.02919
Force (mN) (48)	AP Conduction Velocity (cm/s) - Reported (28)	0.0043118	0.3825	0.00659157	0.138	0.00545168	0.860121
Force (mN) (48)	3D SC % Composition - Reported (150)	0.00420428	0.509	0.00659633	0.1895	0.0054003	0.722391
Force (mN) (48)	3D Stromal Cell Type - SC (34)	0.00416074	0.516	0.00361016	0.604	0.00388545	0.28735
Force (mN) (48)	hiPSC-CM Media Supplement - L-ascorbic acid (39)	0.00414668	0.599	0.00361704	0.6485	0.00388186	0.222573
Force (mN) (48)	3D Platform - Matrigel (32)	0.00413359	0.761	0.0023512	0.9425	0.0032424	0.118615
Force (mN) (48)	Induction Conditions - BMP4 (74)	0.0040693	0.8345	0.006032	0.461	0.00505065	0.336299
Force (mN) (48)	Upstroke Velocity (um/s) - Q4 (9)	0.00403569	0.1335	0.00379971	0.222	0.0039177	0.874519
Force (mN) (48)	Sex of hiPSC Lines - Male (64)	0.00403299	0.747	0.00483776	0.556	0.00443537	0.254925
Force (mN) (48)	Gene Analysis Method - RNA (57)	0.00389135	0.728	0.0031727	0.807	0.00353202	0.137869
Force (mN) (48)	Insulin Addition - prior Day 8 (149)	0.00388505	0.8045	0.0025948	0.9265	0.00323992	0.094474
Force (mN) (48)	Wnt Inhibitor - IWR (54)	0.00388046	0.507	0.00310769	0.6585	0.00349407	0.294992
Force (mN) (48)	Electrophysiology Analysis Method - Reported (117)	0.00387777	0.81	0.00440149	0.6495	0.00413963	0.187421
Force (mN) (48)	Purification Duration - <3 days (17)	0.00383974	0.0695	0.00117793	0.6955	0.00250883	1.15802
Force (mN) (48)	hiPSC-CM Maintenance/Maturation Media (if different) - RPMI-1640 (26)	0.00380736	0.4585	0.00188111	0.8615	0.00284423	0.338661
Force (mN) (48)	Mechanical Maturation (34)	0.0037865	0.5665	0.00464594	0.407	0.00421622	0.390406
Force (mN) (48)	Stress (mN/mm2) - Q4 (9)	0.00374902	0.0955	0.00412396	0.1175	0.00393649	1.02
Force (mN) (48)	Time to Peak (ms) - Q2 (10)	0.00369603	0.407	0.00461546	0.2615	0.00415574	0.582528
Force (mN) (48)	hiPSC-CM Media Supplement - 1-thioglycerol (14)	0.00357593	0.2115	0.00216713	0.573	0.00287153	0.67469
Force (mN) (48)	Insulin Addition - after Day 7 (26)	0.0034161	0.337	0.00196906	0.724	0.00269258	0.47237
Force (mN) (48)	Induction Duration - 1 days (99)	0.00340245	0.887	0.00186421	0.978	0.00263333	0.0520764
Force (mN) (48)	Induction Conditions - bFGF (45)	0.0033986	0.875	0.00272701	0.91	0.00306281	0.0579919
Force (mN) (48)	3D Estimated Tissue Cell Density (10^6 cells/mL) Q1 <2.82 (40)	0.00336596	0.1825	0.00244897	0.44	0.00290746	0.738737
Force (mN) (48)	Disease Modelling - Left Ventricular (15)	0.00330571	0.0895	0.00296583	0.1885	0.00313577	1.04818
Force (mN) (48)	AP Amplitude (mV) - Q3 (9)	0.00328957	0.0355	0.00119676	0.5005	0.00224316	1.44977
Force (mN) (48)	Purification Duration - Reported (88)	0.00328357	0.916	0.0049742	0.6305	0.00412889	0.200315
Force (mN) (48)	Sarcomere Length (um) - Mature Q2 1.7 to 1.9 (28)	0.00314668	0.5305	0.00298711	0.5945	0.00306689	0.275315
Force (mN) (48)	3D Estimated Tissue Size (mm2) Q2 0.28 to 4 (34)	0.00311547	0.708	0.00352885	0.626	0.00332216	0.203426
Force (mN) (48)	3D Estimated Tissue Cell Density (10^6 cells/mL) Q3 >10.8 (40)	0.00309772	0.739	0.00699309	0.172	0.00504541	0.764472
Force (mN) (48)	hiPSC Backbone Media - DMEM (10)	0.00306535	0.1165	0.00385699	0.09	0.00346117	1.04576
Force (mN) (48)	Disease Modelling - DCM (5)	0.00305039	0.0435	0.00146886	0.4155	0.00225962	1.36151
Force (mN) (48)	Extracellular Matrix Maturation (18)	0.00302476	0.4185	0.00331798	0.409	0.00317137	0.388277
Force (mN) (48)	hiPSC-CM Matrix Coating if Replated - Matrigel (64)	0.00301662	0.818	0.00329	0.7475	0.00315331	0.126389
Force (mN) (48)	Transmission Electron Microscopy (62)	0.00293825	0.9025	0.00323906	0.811	0.00308866	0.0909791
Force (mN) (48)	Wnt Inhibition Duration - 2 days (152)	0.00292483	0.9235	0.00508914	0.5455	0.00400699	0.263205
Force (mN) (48)	Cell Alignment Maturation (55)	0.00288433	0.8565	0.00466108	0.506	0.0037727	0.295849
Force (mN) (48)	Induction Duration - 4 days (15)	0.00287105	0.191	0.00398277	0.109	0.00342691	0.962574
Force (mN) (48)	Amplitude (F/F0) - Q1 (13)	0.00286361	0.5935	0.00192691	0.8275	0.00239526	0.226579
Force (mN) (48)	hiPSC-CM Matrix Coating if Replated - Reported (152)	0.00286114	0.961	0.00321407	0.8855	0.00303761	0.0528114
Force (mN) (48)	Sarcomere Length (um) Quantiles (64)	0.00285367	0.9885	0.00502465	0.863	0.00393916	0.0639892
Force (mN) (48)	Sarcomere/Cellular Alignment Analysis (67)	0.00282208	0.805	0.00206995	0.911	0.00244602	0.0942041
Force (mN) (48)	Electrophysiology Analysis Method - Patch Clamp (55)	0.00277545	0.7615	0.00169663	0.9275	0.00223604	0.11833
Force (mN) (48)	2D Surface - ECM-coated (114)	0.00276951	0.7725	0.00192967	0.913	0.00234959	0.112102
Force (mN) (48)	Sarcomere Length (um) Q3 >1.9 (17)	0.00269688	0.6115	0.00392021	0.369	0.00330854	0.432974
Force (mN) (48)	Differentiation Purity Assessment - Flow Cytometry a-actinin+ (9)	0.00266497	0.2075	0.00251732	0.298	0.00259115	0.682982
Force (mN) (48)	AP Amplitude (mV) Quantiles (40)	0.00264814	0.9685	0.00284548	0.968	0.00274681	0.0141246
Force (mN) (48)	hiPSC Backbone Media - mTeSR (102)	0.00262259	0.9585	0.00399626	0.779	0.00330942	0.108463
Force (mN) (48)	Conduction Velocity (cm/s) Quantiles (14)	0.00259739	0.263	0.00535873	0.0525	0.00397806	1.27984
Force (mN) (48)	3D Endothelial Cell Type - Reported (33)	0.00258329	0.1165	0.00152732	0.4265	0.00205531	0.933674
Force (mN) (48)	Amplitude (F/F0) - Reported (50)	0.00256853	0.8955	0.00371515	0.6945	0.00314184	0.158328
Force (mN) (48)	Induction Conditions - Activin A (75)	0.00255721	0.9785	0.00176626	0.988	0.00216173	0.00943917
Force (mN) (48)	Time to Relaxation (ms) Quantiles (10)	0.00254269	0.2945	0.00400963	0.1515	0.00327616	0.819587
Force (mN) (48)	hiPSC-CM Matrix Coating if Replated - Fibronectin (32)	0.0025158	0.336	0.000935025	0.8615	0.00172541	0.473661
Force (mN) (48)	Stress (mN/mm2) - Q3 (9)	0.00239303	0.4065	0.00144055	0.733	0.00191679	0.390939
Force (mN) (48)	Contractile Analysis Method - Motion Tracking (88)	0.00238701	0.7535	0.00193421	0.8355	0.00216061	0.122917
Force (mN) (48)	AP Amplitude (mV) - Reported(40)	0.00237461	0.9085	0.00167485	0.957	0.00202473	0.0416751
Force (mN) (48)	Disease Modelling - Myocardium (11)	0.00236528	0.105	0.00177415	0.318	0.00206972	0.978811
Force (mN) (48)	3D Tissue Media - Iscove (5)	0.00232721	0.22	0.00426072	0.065	0.00329397	1.18709
Force (mN) (48)	hiPSC-CM Media Supplement - Polyvinylalchohol (6)	0.00231489	0.2415	0.00362167	0.116	0.00296828	0.935542
Force (mN) (48)	hiPSC-CM Backbone Media - iCell Maintenance Medium (86)	0.00225449	0.776	0.0045391	0.3385	0.0033968	0.470441
Force (mN) (48)	hiPSC Line - DF19-9-11T.H (16)	0.00223311	0.289	0.00217281	0.424	0.00220296	0.539102
Force (mN) (48)	CM Immunofluorescent Imaging (261)	0.00223106	0.8535	0.00247685	0.8115	0.00235395	0.0907115
Force (mN) (48)	Metabolic Maturation Strategy (Broad) - Growth Factors (4)	0.0022303	0.1285	0.00200954	0.251	0.00211992	0.891097
Force (mN) (48)	Induction Conditions - CHIR99021 (174)	0.00220838	0.968	0.00312236	0.8775	0.00266537	0.0567529
Force (mN) (48)	Ancestry of hiPSC Lines - Asian (30)	0.00216938	0.766	0.00509967	0.2245	0.00363452	0.648784
Force (mN) (48)	Electrophysiology Analysis Method - Optical Mapping (39)	0.00212989	0.8145	0.00469301	0.345	0.00341145	0.462181
Force (mN) (48)	Disease Modelling - Genetic Disorders (23)	0.00209346	0.486	0.00218926	0.528	0.00214136	0.313364
Force (mN) (48)	2D % Confluency - EB (13)	0.00209225	0.0165	0.00246337	0.019	0.00227781	1.78252
Force (mN) (48)	Wnt Inhibitor - XAV939 (23)	0.0020866	0.73	0.00194946	0.778	0.00201803	0.136677
Force (mN) (48)	Metabolic Analysis Method - Seahorse (35)	0.00207424	0.9305	0.00205159	0.9295	0.00206292	0.0317506
Force (mN) (48)	Time to Relaxation (ms) - Q1 (5)	0.00207131	0.193	0.00133438	0.512	0.00170285	0.714443
Force (mN) (48)	3D Estimated Tissue Size (mm2) Q1 <0.28 (34)	0.00206207	0.3085	0.00164023	0.5245	0.00185115	0.510745
Force (mN) (48)	hiPSC Backbone Media - Embryonic Stem Cell (20)	0.0020487	0.1485	0.00586583	0.005	0.00395727	2.30103
Force (mN) (48)	Metabolic Maturation Strategy (Broad) - Hormonal Stimulation (15)	0.0020435	0.374	0.00240325	0.364	0.00222337	0.438899
Force (mN) (48)	Wnt Inhibitor - DS-I-7 (11)	0.00197653	0.6895	0.00193666	0.752	0.0019566	0.161466
Force (mN) (48)	Wnt Inhibition Duration - 3 days (17)	0.00197511	0.5805	0.0026893	0.444	0.00233221	0.352617
Force (mN) (48)	Induction Duration - 2 days (71)	0.00196719	0.924	0.00235197	0.866	0.00215958	0.0624821
Force (mN) (48)	Metabolic Maturation Strategy (Broad) - Fatty Acid and Lipids (19)	0.00191583	0.381	0.00256864	0.2995	0.00224224	0.523603
Force (mN) (48)	hiPSC-CM Media Supplement - L-glutamine (19)	0.00188369	0.2145	0.000312125	0.8885	0.00109791	0.668573
Force (mN) (48)	2D % Confluency - 85 to 89 (31)	0.00187679	0.178	0.0016394	0.329	0.0017581	0.74958
Force (mN) (48)	Sex of hiPSC Lines - Both (10)	0.00187656	0.518	0.0040429	0.152	0.00295973	0.818156
Force (mN) (48)	T-tubules Observed (18)	0.00186345	0.709	0.00177868	0.7735	0.00182106	0.149354
Force (mN) (48)	Pharmacological Interventions - E4031 (22)	0.00184376	0.3825	0.000170012	0.9665	0.00100689	0.417369
Force (mN) (48)	Max Capture Rate (Hz) - Reported (15)	0.00182976	0.207	0.00393977	0.0335	0.00288477	1.47496
Force (mN) (48)	Time to Peak (ms) - Q3 (10)	0.00181628	0.348	0.00138188	0.615	0.00159908	0.458421
Force (mN) (48)	hiPSC Line - WTC11 (30)	0.00178238	0.886	0.0034518	0.567	0.00261709	0.246417
Force (mN) (48)	3D Stromal Cell Type - Specialised (11)	0.00177047	0.472	0.00373745	0.154	0.00275396	0.812479
Force (mN) (48)	Sarcomere Length (um) Q1 <1.7 (19)	0.00176409	0.2255	0.000364937	0.8775	0.00106451	0.646853
Force (mN) (48)	Metabolic Maturation Strategy - T3 (14)	0.00173751	0.202	0.00192572	0.2435	0.00183162	0.694649
Force (mN) (48)	Wnt Inhibition Duration - 4 days (19)	0.00173006	0.2315	0.00155056	0.404	0.00164031	0.635449
Force (mN) (48)	Resting Membrane Potential (mV) - Reported (44)	0.00172248	0.935	0.00340459	0.6495	0.00256354	0.187421
Force (mN) (48)	Disease Modelling - Arrhythmic (15)	0.00170694	0.034	0.00105999	0.268	0.00138346	1.46852
Force (mN) (48)	hiPSC-CM Media Supplement - Specialised (13)	0.00170591	0.2125	0.000828231	0.6515	0.00126707	0.672641
Force (mN) (48)	Differentiation Purity % - 70 to 74 (10)	0.00168299	0.233	0.00208146	0.2315	0.00188222	0.635449
Force (mN) (48)	hiPSC-CM Maintenance/Maturation Media (if different) - DMEM (11)	0.00167349	0.0395	0.0027018	0.003	0.00218764	2.52288
Force (mN) (48)	Contractile Analysis Method - TFM (8)	0.00165883	0.635	0.00218388	0.559	0.00192136	0.252588
Force (mN) (48)	Differentiation Purity % - 95 to 100 (35)	0.0016024	0.7605	0.00275116	0.536	0.00217678	0.270835
Force (mN) (48)	3D Stromal Cell Type - hFF (6)	0.00149402	0.4825	0.00113959	0.6965	0.00131681	0.316503
Force (mN) (48)	3D Platform - Polyethylene Glycol (8)	0.00149401	0.076	0.00141637	0.1315	0.00145519	1.11919
Force (mN) (48)	hiPSC-CM Backbone Media - StemPro-34 (14)	0.00146121	0.5175	0.00334285	0.1715	0.00240203	0.765736
Force (mN) (48)	Contractile Analysis Method - Specialised (6)	0.00145487	0.282	0.00228222	0.19	0.00186855	0.721246
Force (mN) (48)	hiPSC-CM Media Supplement - Transferrin (11)	0.00143504	0.6935	0.00347362	0.2685	0.00245433	0.571056
Force (mN) (48)	Metabolic Analysis Method - Reported (45)	0.00142754	0.961	0.00234033	0.881	0.00188393	0.0550241
Force (mN) (48)	Resting Membrane Potential (mV) - Q1 (11)	0.00140919	0.055	0.00146525	0.1055	0.00143722	1.25964
Force (mN) (48)	Pharmacological Interventions - Specialised (16)	0.00140598	0.52	0.00254439	0.279	0.00197519	0.554396
Force (mN) (48)	3D % Confluency - 2D/3D Values (154)	0.00138794	0.9975	0.00265278	0.9565	0.00202036	0.019315
Force (mN) (48)	Wnt Inhibition Duration - 1 day (12)	0.00138779	0.099	6.20369e-05	0.7535	0.000724913	1.00436
Force (mN) (48)	Metabolic Analysis Method - Specialised (8)	0.00136686	0.083	0.0009333	0.2805	0.00115008	1.08092
Force (mN) (48)	Conduction Velocity (cm/s) - Q2 (7)	0.00135671	0.321	0.00282576	0.1025	0.00209123	0.989276
Force (mN) (48)	hiPSC-CM Media Supplement - Essential Lipids (6)	0.00134542	0.541	0.00158528	0.5705	0.00146535	0.266803
Force (mN) (48)	hiPSC-CM Media Supplement - Albumin (23)	0.00134052	0.8965	0.00207058	0.7735	0.00170555	0.11154
Force (mN) (48)	Gene Analysis Method - Specialised (6)	0.00133871	0.2785	0.00177589	0.2745	0.0015573	0.561458
Force (mN) (48)	2D Surface - Hydrogel (14)	0.00129562	0.3365	0.000881381	0.612	0.0010885	0.473015
Force (mN) (48)	hiPSC-CM Matrix Coating if Replated - Laminin (5)	0.00128192	0.112	0.00072	0.4235	0.00100096	0.950782
Force (mN) (48)	Upstroke Velocity (um/s) - Q2 (10)	0.00123683	0.375	0.00223483	0.177	0.00173583	0.752027
Force (mN) (48)	hiPSC-CM Matrix Coating if Replated - Gelatin (43)	0.00122208	0.1035	0.00136327	0.1515	0.00129268	0.98506
Force (mN) (48)	Amplitude (F/F0) - Q2 (13)	0.00121123	0.336	0.0016387	0.3245	0.00142497	0.488785
Force (mN) (48)	hiPSC Line - BJ1 (7)	0.00113518	0.7865	0.00447107	0.1505	0.00280312	0.822464
Force (mN) (48)	AP Amplitude (mV) - Q4 (10)	0.00112716	0.619	0.00210488	0.3935	0.00161602	0.405055
Force (mN) (48)	3D Tissue Media - High-glucose DMEM (7)	0.00109951	0.636	0.00260743	0.2345	0.00185347	0.629857
Force (mN) (48)	hiPSC Line - 201B7 (9)	0.00107089	0.424	0.00146108	0.3715	0.00126598	0.430041
Force (mN) (48)	hiPSC-CM Backbone Media - Commercial Cardiomyocyte Kit (12)	0.00104851	0.128	0.000753996	0.333	0.000901251	0.89279
Force (mN) (48)	AP Conduction Velocity (cm/s) - Q4 (7)	0.00102154	0.691	0.00184416	0.5285	0.00143285	0.276955
Force (mN) (48)	Wnt Inhibitor - Reported (227)	0.00102053	0.786	0.000522471	0.9285	0.000771502	0.104577
Force (mN) (48)	Calcium Handling Analysis Method - Genetical (23)	0.00101344	0.427	0.00233251	0.148	0.00167298	0.829738
Force (mN) (48)	Differentiation Purity % - 75 to 79 (8)	0.00100794	0.653	0.00192982	0.449	0.00146888	0.347754
Force (mN) (48)	AP Amplitude (mV) - Q1 (11)	0.000992493	0.8125	0.000520255	0.945	0.000756374	0.0901766
Force (mN) (48)	3D % Confluency - EB (31)	0.000989895	0.172	0.000665021	0.4165	0.000827458	0.764472
Force (mN) (48)	2D Surface - Electrospun (13)	0.000985106	0.2275	0.000722199	0.443	0.000853652	0.643019
Force (mN) (48)	hiPSC Line - SCVI-273 (8)	0.000982666	0.1975	0	0.731	0.000982666	0.704433
Force (mN) (48)	hiPSC-CM Media Supplement - Selenium (7)	0.000941057	0.694	0.00215062	0.367	0.00154584	0.435334
Force (mN) (48)	hiPSC Line - BJ RiPS (4)	0.000920194	0.498	0.00304502	0.092	0.00198261	1.03621
Force (mN) (48)	Wnt Inhibition Duration - >6 days (12)	0.000913688	0.922	0.00179956	0.763	0.00135663	0.117475
Force (mN) (48)	Metabolic Maturation Strategy (Broad) - Known (30)	0.000885634	0.9105	0.00114814	0.8835	0.00101689	0.0537934
Force (mN) (48)	hiPSC Backbone Media - Conditioned (12)	0.000876438	0.869	0.000936637	0.877	0.000906537	0.0609802
Force (mN) (48)	Purification Duration - 6 days (10)	0.00087034	0.7505	0.0015306	0.598	0.00120047	0.223299
Force (mN) (48)	Wnt Inhibition Duration - Reported (222)	0.000859921	0.899	0.000356402	0.99	0.000608161	0.0462403
Force (mN) (48)	Contractile Analysis Method - Reported(163)	0.000859471	0.236	0.000705567	0.4035	0.000782519	0.627088
Force (mN) (48)	Number of hiPSC Lines - 2 (50)	0.000842054	0.9755	0.00452588	0.352	0.00268397	0.453457
Force (mN) (48)	Conduction Velocity (cm/s) - Reported (14)	0.000826346	0.7625	0.00129555	0.695	0.00106095	0.158015
Force (mN) (48)	Induction Duration - 5 days (8)	0.000812899	0.196	0.000786415	0.374	0.000799657	0.707744
Force (mN) (48)	Metabolic Maturation (30)	0.000805863	0.922	0.00100982	0.924	0.000907841	0.0352691
Force (mN) (48)	Pharmacological Interventions - Verapamil (27)	0.000804961	0.534	0.000681585	0.707	0.000743273	0.272459
Force (mN) (48)	AP Conduction Velocity (cm/s) - Q2 (8)	0.000794697	0.623	0.00319303	0.094	0.00199386	1.02687
Force (mN) (48)	Purification Duration - 3 days (12)	0.000786393	0.2685	0.000716669	0.3995	0.000751531	0.571056
Force (mN) (48)	Resting Membrane Potential (mV) - Q3 (11)	0.000783101	0.6065	0.00162726	0.3675	0.00120518	0.434743
Force (mN) (48)	Purification Duration - >9 days (5)	0.000778671	0.561	0.0012691	0.4345	0.00102388	0.36201
Force (mN) (48)	Max Capture Rate (Hz) - Q1 (8)	0.000764774	0.5795	0.00180635	0.277	0.00128556	0.55752
Force (mN) (48)	hiPSC-CM Matrix Coating if Replated - Geltrex (10)	0.000758114	0.6235	0.000963282	0.626	0.000860698	0.205164
Force (mN) (48)	Purification Stategy - Antibiotic (3)	0.000745493	0.31	0.00096912	0.331	0.000857307	0.508638
Force (mN) (48)	Purification Stategy - Media (6)	0.000744188	0.578	0.00297814	0.086	0.00186116	1.0655
Force (mN) (48)	Pharmacological Interventions - Cisapride (5)	0.000740364	0.268	0.00145427	0.12	0.00109732	0.920819
Force (mN) (48)	Amplitude (F/F0) - Q4 (12)	0.00073817	0.8105	0.000859015	0.8435	0.000798592	0.091247
Force (mN) (48)	hiPSC-CM Media Supplement - Nonessential Amino Acids (7)	0.000709124	0.5785	0.00277878	0.112	0.00174395	0.950782
Force (mN) (48)	hiPSC Backbone Media - Reported (228)	0.000705985	0.5605	0.00244524	0.152	0.00157561	0.818156
Force (mN) (48)	Number of hiPSC Lines - 4 (10)	0.000643998	0.632	0.00178887	0.316	0.00121643	0.500313
Force (mN) (48)	Metabolic Maturation Strategy (Broad) - Glucocorticoids (7)	0.000623537	0.345	0.000576832	0.533	0.000600185	0.462181
Force (mN) (48)	3D Platform - Gelatin (6)	0.000603382	0.322	0.000328839	0.6565	0.00046611	0.492144
Force (mN) (48)	3D % Confluency - 85 to 89 (12)	0.000602769	0.585	0.000890493	0.603	0.000746631	0.232844
Force (mN) (48)	Upstroke Velocity (um/s) - Q3 (11)	0.000597707	0.856	0.00183683	0.4945	0.00121727	0.305834
Force (mN) (48)	3D % Confluency - 95 to 100 (15)	0.000593646	0.6445	0	0.8945	0.000593646	0.190777
Force (mN) (48)	hiPSC-CM Maintenance/Maturation Media (if different) - DMEM/F12 (6)	0.000588145	0.445	0	0.7935	0.000588145	0.35164
Force (mN) (48)	2D % Confluency - 95 to 100 (13)	0.000576074	0.7265	0.000794165	0.718	0.000685119	0.143876
Force (mN) (48)	Stress (mN/mm2) - Q1 (10)	0.000573526	0.9265	0.00148993	0.754	0.00103173	0.122629
Force (mN) (48)	AP Conduction Velocity (cm/s) - Q3 (6)	0.000561338	0.3885	0.000639876	0.456	0.000600607	0.410609
Force (mN) (48)	Metabolic Maturation Strategy (Broad) - Thyroid Hormones (14)	0.000512595	0.73	0.00019536	0.93	0.000353978	0.136677
Force (mN) (48)	Induction Conditions - Reported (238)	0.000508903	0.3625	0.00046075	0.541	0.000484826	0.440692
Force (mN) (48)	Purification Duration - 5 days (6)	0.000491006	0.491	0.000875489	0.373	0.000683247	0.428291
Force (mN) (48)	3D Stromal Cell Type - hDF (7)	0.000487625	0.737	0.00136434	0.437	0.000925985	0.359519
Force (mN) (48)	Number of hiPSC Lines - >5 (8)	0.000483597	0.739	0.000376028	0.8665	0.000429813	0.131356
Force (mN) (48)	Beat Rate (beats per minute) - Q1 (15)	0.000479534	0.467	0.000423032	0.6	0.000451283	0.330683
Force (mN) (48)	Max Capture Rate (Hz) Quantiles (15)	0.000477351	0.7595	0.00462055	0.0165	0.00254895	1.78252
Force (mN) (48)	Wnt Inhibitor - Wnt-C59 (28)	0.000472807	0.792	0.00294268	0.164	0.00170775	0.785156
Force (mN) (48)	Metabolic Maturation Strategy - Specialised (9)	0.000462416	0.7575	0.000868679	0.6485	0.000665547	0.18809
Force (mN) (48)	Pharmacological Interventions - Blebbistatin (5)	0.000432446	0.726	0.000370987	0.859	0.000401716	0.139063
Force (mN) (48)	Disease Modelling - Metabolic Disorders (4)	0.000425199	0.449	9.33489e-05	0.701	0.000259274	0.347754
Force (mN) (48)	Metabolic Maturation Strategy - IGF-1 (3)	0.000416628	0.4605	0.000823463	0.348	0.000620045	0.458421
Force (mN) (48)	Metabolic Analysis Method - Mitochondrial (4)	0.000408834	0.4825	0	0.754	0.000408834	0.316503
Force (mN) (48)	3D Tissue Media - MEM-α (6)	0.00040486	0.4205	0.00133974	0.1415	0.0008723	0.849244
Force (mN) (48)	Beat Rate (beats per minute) - Q3 (10)	0.000381609	0.7755	0.0018054	0.2875	0.0010935	0.541362
Force (mN) (48)	3D % Confluency - 70 to 79 (4)	0.000378712	0.537	0.00031644	0.6985	0.000347576	0.270026
Force (mN) (48)	Metabolic Maturation Strategy - Reported (30)	0.000373258	0.9775	0	0.9915	0.000373258	0.00988323
Force (mN) (48)	hiPSC-CM Media Supplement - Mercaptoethanol (10)	0.000346656	0.8025	0.000738333	0.7105	0.000542495	0.148436
Force (mN) (48)	Electrophysiology Analysis Method - Genetical (3)	0.000346274	0.514	0	0.7085	0.000346274	0.289037
Force (mN) (48)	hiPSC Line - iCell2 (8)	0.000340937	0.5295	0.000630483	0.458	0.00048571	0.339135
Force (mN) (48)	Stress (mN/mm2) - Q2 (9)	0.000338702	0.497	0	0.6955	0.000338702	0.303644
Force (mN) (48)	hiPSC Line - ATCC (5)	0.000302111	0.818	0	0.9185	0.000302111	0.0872467
Force (mN) (48)	Metabolic Maturation Strategy - Palmitic Acid (10)	0.000299304	0.9335	0.000385078	0.95	0.000342191	0.0298857
Force (mN) (48)	3D Platform - 3D printed (9)	0.000293658	0.6345	0.00064462	0.485	0.000469139	0.314258
Force (mN) (48)	hiPSC-CM Media Supplement - GlutaMax (8)	0.000220867	0.945	0.000455516	0.9405	0.000338192	0.0266412
Force (mN) (48)	Metabolic Maturation Strategy - Linoleic/Oleic Acid (4)	0.000210259	0.5745	0.000280047	0.711	0.000245153	0.24071
Force (mN) (48)	Disease Modelling - Fibrotic (3)	0.000209651	0.556	0.000279395	0.6855	0.000244523	0.254925
Force (mN) (48)	3D EC % Composition - >9 (30)	0.000203021	0.8335	0.00139421	0.4475	0.000798613	0.349207
Force (mN) (48)	Disease Modelling - HCM (6)	0.000170471	0.6795	0	0.7475	0.000170471	0.167811
Force (mN) (48)	hiPSC-CM Maintenance/Maturation Media (if different) - Modified Essential Medium (1)	0.000161442	0.682	0	0.7645	0.000161442	0.166216
Force (mN) (48)	Pharmacological Interventions - Lidocaine (7)	0.000133501	0.5995	0	0.729	0.000133501	0.222211
Force (mN) (48)	AP Amplitude (mV) - Q2 (10)	0.000132293	0.6835	0.000448319	0.6075	0.000290306	0.216454
Force (mN) (48)	hiPSC Line - C25 (6)	0.00013052	0.876	0.00256061	0.1455	0.00134557	0.837137
Force (mN) (48)	Time to Peak (ms) - Q4 (10)	0.000110093	0.8745	0	0.923	0.000110093	0.0582402
Force (mN) (48)	3D Stromal Cell Type - SMC (3)	0	0.697	0.000304584	0.687	0.000304584	0.163043
Force (mN) (48)	Pharmacological Interventions - T3 (3)	0	0.6705	0.000328671	0.688	0.000328671	0.173601
Force (mN) (48)	hiPSC Line - Cor.4U (16)	0	0.661	0.000340595	0.6485	0.000340595	0.18809
Force (mN) (48)	2D % Confluency - 90 to 94 (10)	0	0.644	0.000372093	0.6695	0.000372093	0.191114
Force (mN) (48)	Upstroke Velocity (um/s) - Q1 (10)	0	0.6975	0.000394366	0.6865	0.000394366	0.163359
Force (mN) (48)	hiPSC Line - iCell (46)	0	0.6615	0.000463499	0.5775	0.000463499	0.238448
Force (mN) (48)	Measured Fatty Acid Metabolism (18)	0	0.984	0.000468061	0.965	0.000468061	0.0154727
Force (mN) (48)	Resting Membrane Potential (mV) - Q2 (13)	0	0.9635	0.000681728	0.8915	0.000681728	0.0498787
Force (mN) (48)	Metabolic Maturation Strategy - Dexamethasone (7)	0	0.652	0.000785809	0.3545	0.000785809	0.450384
Force (mN) (48)	Conduction Velocity (cm/s) - Q1 (7)	0	0.6935	0.00131893	0.1785	0.00131893	0.748362
Force (mN) (48)	Electrophysiology Analysis Method - Microelectrode (29)	0	0.8625	0.00134964	0.415	0.00134964	0.381952
Force (mN) (48)	Disease Modelling - Specialised (3)	0	0.887	0.00160092	0.3315	0.00160092	0.479516
Force (mN) (48)	Metabolic Maturation Strategy (Broad) - Metabolic Modulation (19)	0	0.952	0.00164046	0.558	0.00164046	0.253366
Force (mN) (48)	3D Endothelial Cell Type - Specialised (3)	0	0.663	0.00191122	0.04	0.00191122	1.39794
Stress (mN/mm2) (37)	Pharmacological Interventions - Reported (141)	0.033675	0	0.0290769	0	0.031376	3.30103
Stress (mN/mm2) (37)	3D Estimated Tissue Size (mm2) Quantiles (133)	0.0223397	0.0645	0.0173604	0.128	0.01985	1.19044
Stress (mN/mm2) (37)	3D % Confluency - 2D/3D Values (154)	0.0183793	0.0375	0.0132847	0.0805	0.015832	1.42597
Stress (mN/mm2) (37)	hiPSC Backbone Media - Essential 8 (82)	0.017199	0.029	0.0110527	0.106	0.0141258	1.5376
Stress (mN/mm2) (37)	3D Estimated Tissue Cell Density (10^6 cells/mL) Quantiles (120)	0.0143712	0.301	0.0135208	0.3095	0.013946	0.521434
Stress (mN/mm2) (37)	3D Platform - Fibrin (50)	0.0137276	0.071	0.0172202	0.0185	0.0154739	1.73283
Stress (mN/mm2) (37)	Wnt Inhibitor - IWP (110)	0.0125459	0.11	0.00801838	0.2405	0.0102822	0.958607
Stress (mN/mm2) (37)	hiPSC-CM Matrix Coating if Replated - Reported (152)	0.0119826	0.1965	0.0107477	0.1865	0.0113652	0.729321
Stress (mN/mm2) (37)	3D SC % Composition - >24 (30)	0.0118113	0.0515	0.0137355	0.0195	0.0127734	1.70997
Stress (mN/mm2) (37)	3D Platform - Matrigel (32)	0.0118013	0.131	0.0124419	0.0845	0.0121216	1.07314
Stress (mN/mm2) (37)	Pharmacological Interventions - Isoproterenol (70)	0.0116659	0.09	0.00700329	0.2575	0.0093346	1.04576
Stress (mN/mm2) (37)	3D Estimated Tissue Size (mm2) Q2 0.28 to 4 (34)	0.0111327	0.0925	0.011192	0.063	0.0111623	1.20066
Stress (mN/mm2) (37)	3D Stromal Cell Type - SC (34)	0.0109703	0.1195	0.0116129	0.0615	0.0112916	1.21112
Stress (mN/mm2) (37)	3D % Confluency - Reported (239)	0.0109133	0.2095	0.00958785	0.1995	0.0102506	0.700057
Stress (mN/mm2) (37)	Purification Duration - 4 days (28)	0.0102774	0.1465	0.00504221	0.4865	0.0076598	0.834162
Stress (mN/mm2) (37)	Force (mN) Quantiles (48)	0.0102465	0.397	0.0068549	0.6825	0.00855071	0.401209
Stress (mN/mm2) (37)	3D CM % Composition - >74 (115)	0.0102409	0.1835	0.00650858	0.4095	0.00837472	0.736364
Stress (mN/mm2) (37)	3D Endothelial Cell Type - hiPSC-EC (16)	0.0100912	0.016	0.00739042	0.082	0.00874079	1.79588
Stress (mN/mm2) (37)	Wnt Inhibitor - XAV939 (23)	0.0100206	0.018	0.00997095	0.029	0.00999578	1.74473
Stress (mN/mm2) (37)	2D % Confluency - 2D/3D Values (154)	0.00981376	0.2225	0.00901126	0.1925	0.00941251	0.715569
Stress (mN/mm2) (37)	Mechanical Maturation (34)	0.00979307	0.0175	0.00693584	0.0805	0.00836445	1.75696
Stress (mN/mm2) (37)	Sex of hiPSC Lines - Male (64)	0.00978716	0.224	0.00885074	0.221	0.00931895	0.655608
Stress (mN/mm2) (37)	Differentiation Purity % - 85 to 89 (24)	0.00967927	0.0155	0.0123708	0.007	0.011025	2.1549
Stress (mN/mm2) (37)	Purification Duration - Reported (88)	0.00965167	0.301	0.00458779	0.706	0.00711973	0.521434
Stress (mN/mm2) (37)	3D Estimated Tissue Cell Density (10^6 cells/mL) Q2 2.82 to 10.8 (40)	0.00953499	0.109	0.0080481	0.171	0.00879155	0.962574
Stress (mN/mm2) (37)	AP Conduction Velocity (cm/s) Quantiles (28)	0.00933559	0.0155	0.00718789	0.0775	0.00826174	1.80967
Stress (mN/mm2) (37)	Contractile Analysis Method - Post Deflection (39)	0.00910049	0.173	0.00660041	0.301	0.00785045	0.761954
Stress (mN/mm2) (37)	Purification Stategy - Glucose & Lactate (85)	0.00886257	0.343	0.00624728	0.5115	0.00755493	0.464706
Stress (mN/mm2) (37)	Number of hiPSC Lines - 1 (218)	0.00878867	0.235	0.0096993	0.1405	0.00924399	0.852324
Stress (mN/mm2) (37)	Force (mN) - Q3 (11)	0.00871006	0.082	0.00750651	0.1345	0.00810829	1.08619
Stress (mN/mm2) (37)	3D Tissue Media - B27 (67)	0.00866746	0.3245	0.00598242	0.513	0.00732494	0.488785
Stress (mN/mm2) (37)	Induction Duration - 1 days (99)	0.0083776	0.316	0.00859708	0.213	0.00848734	0.67162
Stress (mN/mm2) (37)	hiPSC Line - WTC11 (30)	0.00825963	0.1835	0.00830284	0.1545	0.00828124	0.811072
Stress (mN/mm2) (37)	3D Endothelial Cell Type - Reported (33)	0.00798963	0.0685	0.00585922	0.1875	0.00692442	1.16431
Stress (mN/mm2) (37)	3D Stromal Cell Type - hDF (7)	0.00798953	0.0455	0.00682199	0.0895	0.00740576	1.34199
Stress (mN/mm2) (37)	Gene Analysis Method - Reported (167)	0.00735923	0.493	0.00792496	0.347	0.0076421	0.459671
Stress (mN/mm2) (37)	Induction Conditions - Activin A (75)	0.0073003	0.412	0.00946267	0.187	0.00838148	0.728158
Stress (mN/mm2) (37)	Electrophysiology Analysis Method - Optical Mapping (39)	0.0072496	0.201	0.00854657	0.1135	0.00789808	0.945004
Stress (mN/mm2) (37)	3D Stromal Cell Type - Reported (77)	0.00711998	0.323	0.0070873	0.2615	0.00710364	0.582528
Stress (mN/mm2) (37)	3D Estimated Tissue Size (mm2) Q3 >20 (32)	0.00708767	0.429	0.00607296	0.482	0.00658032	0.367543
Stress (mN/mm2) (37)	3D Stromal Cell Type - hCF (30)	0.00700664	0.313	0.00812898	0.184	0.00756781	0.735182
Stress (mN/mm2) (37)	Insulin Addition - after Day 7 (26)	0.00692632	0.293	0.00494768	0.467	0.005937	0.533132
Stress (mN/mm2) (37)	Purification Duration - <3 days (17)	0.00676452	0.0525	0.00498554	0.171	0.00587503	1.27984
Stress (mN/mm2) (37)	AP Conduction Velocity (cm/s) - Q4 (7)	0.00674054	0.0025	0.00475759	0.0425	0.00574907	2.60206
Stress (mN/mm2) (37)	2D Surface - Reported (137)(177)	0.00669475	0.33	0.00563124	0.4105	0.006163	0.481486
Stress (mN/mm2) (37)	3D Platform - Collagen (37)	0.00664291	0.522	0.00696418	0.403	0.00680354	0.394695
Stress (mN/mm2) (37)	Time to Peak (ms) Quantiles (41)	0.00662415	0.373	0.00503342	0.6105	0.00582878	0.428291
Stress (mN/mm2) (37)	Purification Duration - 7 days (6)	0.00636076	0.0215	0.00281215	0.3545	0.00458646	1.66756
Stress (mN/mm2) (37)	Metabolic Maturation Strategy (Broad) - Known (30)	0.00631277	0.119	0.00659391	0.1195	0.00645334	0.924453
Stress (mN/mm2) (37)	Electrophysiology Analysis Method - Reported (117)	0.00617019	0.539	0.00371966	0.79	0.00494492	0.268411
Stress (mN/mm2) (37)	hiPSC Line - BJ1 (7)	0.00613189	0.0425	0.0113159	0.006	0.00872388	2.22185
Stress (mN/mm2) (37)	3D Estimated Tissue Cell Density (10^6 cells/mL) Q3 >10.8 (40)	0.00600748	0.5545	0.00680606	0.3475	0.00640677	0.459045
Stress (mN/mm2) (37)	Upstroke Velocity (um/s) Quantiles (40)	0.0059931	0.346	0.00527451	0.4625	0.0056338	0.460924
Stress (mN/mm2) (37)	3D SC % Composition - <25 (120)	0.00578132	0.545	0.00581309	0.463	0.00579721	0.334419
Stress (mN/mm2) (37)	AP Conduction Velocity (cm/s) - Reported (28)	0.00572658	0.1305	0.00654611	0.115	0.00613635	0.939302
Stress (mN/mm2) (37)	Ancestry of hiPSC Lines - Asian (30)	0.00569057	0.4265	0.00602106	0.3185	0.00585581	0.496891
Stress (mN/mm2) (37)	Sex of hiPSC Lines - Female (42)	0.00558609	0.2205	0.00852173	0.057	0.00705391	1.24413
Stress (mN/mm2) (37)	3D Stromal Cell Type - hiPSC-MC (3)	0.00556963	0.0495	0.00596492	0.059	0.00576728	1.30539
Stress (mN/mm2) (37)	Induction Conditions - CHIR99021 (174)	0.00541813	0.415	0.00816632	0.1395	0.00679222	0.855426
Stress (mN/mm2) (37)	Wnt Inhibition Duration - 2 days (152)	0.00540605	0.516	0.00732612	0.257	0.00636609	0.590067
Stress (mN/mm2) (37)	hiPSC-CM Backbone Media - RPMI-1640 (161)	0.00540451	0.5085	0.00312191	0.8065	0.00426321	0.293709
Stress (mN/mm2) (37)	2D Surface - Hydrogel (14)	0.00539025	0.0435	0.00370445	0.191	0.00454735	1.36151
Stress (mN/mm2) (37)	Wnt Inhibition Duration - 4 days (19)	0.0053585	0.009	0.00307712	0.179	0.00421781	2.04576
Stress (mN/mm2) (37)	Purification Stategy - Reported (101)	0.00529977	0.6825	0.00341783	0.8375	0.0043588	0.165897
Stress (mN/mm2) (37)	Force (mN) - Reported (48)	0.00504695	0.61	0.0063028	0.361	0.00567487	0.442493
Stress (mN/mm2) (37)	3D Tissue Media - Reported (157)	0.00501879	0.382	0.00213938	0.842	0.00357909	0.417937
Stress (mN/mm2) (37)	3D CM % Composition - <75 (35)	0.00501158	0.3535	0.00576166	0.259	0.00538662	0.5867
Stress (mN/mm2) (37)	Induction Duration - 2 days (71)	0.00500747	0.3545	0.00477238	0.362	0.00488993	0.450384
Stress (mN/mm2) (37)	3D Estimated Tissue Size (mm2) Q3 4 to 20 (33)	0.00487738	0.5525	0.00629232	0.3415	0.00558485	0.466609
Stress (mN/mm2) (37)	Amplitude (F/F0) - Reported (50)	0.00486852	0.42	0.00525167	0.372	0.0050601	0.429457
Stress (mN/mm2) (37)	hiPSC Line - Specialised (121)	0.00484735	0.4825	0.00405578	0.5635	0.00445156	0.316503
Stress (mN/mm2) (37)	Insulin Addition - prior Day 8 (149)	0.00477565	0.7825	0.00308439	0.885	0.00393002	0.106516
Stress (mN/mm2) (37)	Gene Analysis Method - Specialised (6)	0.00476651	0.0155	0.0051089	0.0275	0.00493771	1.80967
Stress (mN/mm2) (37)	Disease Modelling - Reported (50)	0.00470037	0.445	0.00501783	0.378	0.0048591	0.422508
Stress (mN/mm2) (37)	Induction Conditions - Wnt3a (3)	0.00461912	0.1105	0.00498123	0.1335	0.00480018	0.956638
Stress (mN/mm2) (37)	Elastomeric Maturation (33)	0.0045875	0.5855	0.00481096	0.514	0.00469923	0.289037
Stress (mN/mm2) (37)	Tension Maturation (64)	0.00455515	0.642	0.00345118	0.7795	0.00400316	0.192465
Stress (mN/mm2) (37)	Contractile Analysis Method - Motion Tracking (88)	0.00454846	0.2715	0.00470789	0.2555	0.00462817	0.592609
Stress (mN/mm2) (37)	Sex of hiPSC Lines - Known (116)	0.00447792	0.789	0.00389606	0.7865	0.00418699	0.104301
Stress (mN/mm2) (37)	Ancestry of hiPSC Lines - Known (71)	0.00446096	0.7095	0.00352372	0.7775	0.00399234	0.149048
Stress (mN/mm2) (37)	CM Immunofluorescent Imaging (261)	0.00444688	0.04	0.00256378	0.268	0.00350533	1.39794
Stress (mN/mm2) (37)	hiPSC-CM Maintenance/Maturation Media (if different) - Reported (51)	0.00442664	0.641	0.00445345	0.5855	0.00444005	0.232473
Stress (mN/mm2) (37)	Sarcomere Length (um) Quantiles (64)	0.00434708	0.8305	0.00382169	0.874	0.00408438	0.0806604
Stress (mN/mm2) (37)	Amplitude (F/F0) Quantiles (50)	0.00430411	0.625	0.00400222	0.717	0.00415316	0.20412
Stress (mN/mm2) (37)	hiPSC Backbone Media - Conditioned (12)	0.00427903	0.211	0.00356167	0.3775	0.00392035	0.675718
Stress (mN/mm2) (37)	Wnt Inhibition Duration - Reported (222)	0.0042723	0.6045	0.00662977	0.2595	0.00545104	0.585863
Stress (mN/mm2) (37)	2D Surface - ECM-coated (114)	0.00406437	0.266	0.004379	0.2645	0.00422168	0.577574
Stress (mN/mm2) (37)	2D Surface - Micropatterned (24)	0.00400719	0.1865	0.00150971	0.7595	0.00275845	0.729321
Stress (mN/mm2) (37)	Metabolic Maturation Strategy (Broad) - Glucocorticoids (7)	0.00397513	0.0445	0.00369211	0.1145	0.00383362	1.35164
Stress (mN/mm2) (37)	Induction Conditions - bFGF (45)	0.00397413	0.437	0.0033545	0.5695	0.00366431	0.359519
Stress (mN/mm2) (37)	Differentiation Purity Assessment - Flow Cytometry cTnT+ (134)	0.00392434	0.8275	0.00278962	0.8965	0.00335698	0.082232
Stress (mN/mm2) (37)	Induction Conditions - BMP4 (74)	0.00390427	0.6995	0.00292073	0.822	0.0034125	0.155212
Stress (mN/mm2) (37)	Force (mN) - Q4 (12)	0.00388385	0.251	0.00510874	0.1535	0.0044963	0.813892
Stress (mN/mm2) (37)	3D Tissue Media - RPMI-1640 (71)	0.00383973	0.872	0.00499797	0.666	0.00441885	0.176526
Stress (mN/mm2) (37)	Amplitude (F/F0) - Q1 (13)	0.00383629	0.402	0.0063612	0.143	0.00509874	0.844664
Stress (mN/mm2) (37)	Differentiation Purity Assessment - Visual Inspection (4)	0.00383285	0.0445	0.00594587	0.012	0.00488936	1.92082
Stress (mN/mm2) (37)	Number of hiPSC Lines - 2 (50)	0.00383161	0.646	0.0049702	0.4645	0.00440091	0.333014
Stress (mN/mm2) (37)	Contractile Analysis Method - Force Transducer (26)	0.00365247	0.849	0.00683038	0.3625	0.00524143	0.440692
Stress (mN/mm2) (37)	Max Capture Rate (Hz) - Reported (15)	0.00352154	0.5985	0.00124793	0.9455	0.00238473	0.222936
Stress (mN/mm2) (37)	Max Capture Rate (Hz) - Q2 (7)	0.00351768	0.4	0.00336206	0.463	0.00343987	0.39794
Stress (mN/mm2) (37)	Electrical Maturation (38)	0.00344948	0.7015	0.00447684	0.5145	0.00396316	0.288615
Stress (mN/mm2) (37)	Insulin Addition - Induction (172)	0.00344802	0.8055	0.00146552	0.9715	0.00245677	0.0939345
Stress (mN/mm2) (37)	3D Tissue Media - DMEM (53)	0.00340831	0.6285	0.0018448	0.897	0.00262656	0.201695
Stress (mN/mm2) (37)	Pharmacological Interventions - Verapamil (27)	0.00340464	0.3405	0.0038889	0.317	0.00364677	0.498941
Stress (mN/mm2) (37)	Differentiation Purity % - Reported (153)	0.00339305	0.87	0.0039107	0.745	0.00365188	0.127844
Stress (mN/mm2) (37)	hiPSC Line - Gibco episomal (10)	0.00329495	0.2015	0.00118863	0.7615	0.00224179	0.695725
Stress (mN/mm2) (37)	hiPSC-CM Media Supplement - B27 (174)	0.00320741	0.6745	0.00499455	0.4	0.00410098	0.39794
Stress (mN/mm2) (37)	3D Stromal Cell Type - hFF (6)	0.00314457	0.0035	0.000493287	0.6675	0.00181893	2.45593
Stress (mN/mm2) (37)	3D EC % Composition - <10 (120)	0.00314432	0.789	0.002175	0.8915	0.00265966	0.102923
Stress (mN/mm2) (37)	Metabolic Maturation (30)	0.00310662	0.5085	0.00622854	0.133	0.00466758	0.876148
Stress (mN/mm2) (37)	2D % Confluency - Reported (236)	0.00309226	0.9055	0.00449762	0.662	0.00379494	0.179142
Stress (mN/mm2) (37)	hiPSC-CM Media Supplement - L-ascorbic acid (39)	0.00309162	0.653	0.0039713	0.4865	0.00353146	0.312917
Stress (mN/mm2) (37)	hiPSC-CM Matrix Coating if Replated - Matrigel (64)	0.00308173	0.743	0.00259826	0.808	0.00284	0.129011
Stress (mN/mm2) (37)	3D Stromal Cell Type - hMSC (12)	0.00307475	0.388	0.0047465	0.1925	0.00391062	0.715569
Stress (mN/mm2) (37)	Differentiation Purity % - 95 to 100 (35)	0.00304838	0.6145	0.00314982	0.6125	0.0030991	0.212894
Stress (mN/mm2) (37)	Other Cells Maturation (77)	0.00301638	0.8855	0.0016901	0.96	0.00235324	0.0528114
Stress (mN/mm2) (37)	hiPSC Line - DF19-9-11T.H (16)	0.0029796	0.4575	0.00555545	0.156	0.00426753	0.806875
Stress (mN/mm2) (37)	hiPSC Backbone Media - Reported (228)	0.00296167	0.4415	0.00263618	0.541	0.00279892	0.355069
Stress (mN/mm2) (37)	Metabolic Maturation Strategy - Reported (30)	0.00296161	0.57	0	0.994	0.00296161	0.244125
Stress (mN/mm2) (37)	Cell Alignment Maturation (55)	0.0029562	0.7935	0.00305785	0.764	0.00300702	0.116907
Stress (mN/mm2) (37)	Transmission Electron Microscopy (62)	0.00293696	0.8075	0.00350796	0.6845	0.00322246	0.164627
Stress (mN/mm2) (37)	AP Amplitude (mV) Quantiles (40)	0.00293105	0.347	0.0037911	0.3115	0.00336107	0.506542
Stress (mN/mm2) (37)	hiPSC-CM Matrix Coating if Replated - Fibronectin (32)	0.00290563	0.513	0.00167629	0.8125	0.00229096	0.289883
Stress (mN/mm2) (37)	Upstroke Velocity (um/s) - Q3 (11)	0.00289483	0.1205	0.00701514	0.006	0.00495499	2.22185
Stress (mN/mm2) (37)	hiPSC-CM Media Supplement - Albumin (23)	0.00286988	0.1305	0.00105771	0.6315	0.0019638	0.884389
Stress (mN/mm2) (37)	Upstroke Velocity (um/s) - Reported (40)	0.0028552	0.687	0.00249024	0.771	0.00267272	0.163043
Stress (mN/mm2) (37)	Sarcomere/Cellular Alignment Analysis (67)	0.0028308	0.886	0.00313796	0.815	0.00298438	0.0888424
Stress (mN/mm2) (37)	Beat Rate (beats per minute) Quantiles (54)	0.00278764	0.706	0.00149027	0.9295	0.00213896	0.151195
Stress (mN/mm2) (37)	Induction Duration - 3 days (37)	0.00273994	0.601	0.00395744	0.411	0.00334869	0.386158
Stress (mN/mm2) (37)	Gene Analysis Method - RNA (57)	0.00272089	0.6225	0.00514196	0.282	0.00393143	0.549751
Stress (mN/mm2) (37)	Calcium Handling Analysis Method - Dye (99)	0.00271781	0.865	0.00384837	0.659	0.00328309	0.181115
Stress (mN/mm2) (37)	Electrophysiology Analysis Method - Motion-Contrast Reconstruction (4)	0.00268658	0.1375	0.00441202	0.0425	0.0035493	1.37161
Stress (mN/mm2) (37)	Metabolic Maturation Strategy (Broad) - Thyroid Hormones (14)	0.00266156	0.198	0.0012327	0.6435	0.00194713	0.703335
Stress (mN/mm2) (37)	hiPSC Line - iCell (46)	0.0025833	0.0275	0.00118052	0.379	0.00188191	1.56067
Stress (mN/mm2) (37)	hiPSC-CM Maintenance/Maturation Media (if different) - RPMI-1640 (26)	0.00258104	0.8755	0.00315199	0.75	0.00286652	0.124939
Stress (mN/mm2) (37)	3D Stromal Cell Type - hiPSC-CF (8)	0.00253938	0.2045	0.00528899	0.041	0.00391419	1.38722
Stress (mN/mm2) (37)	Measured Fatty Acid Metabolism (18)	0.00247381	0.3485	0.00137113	0.7045	0.00192247	0.457797
Stress (mN/mm2) (37)	hiPSC Line - Reported (310)	0.00242795	0.0265	0.00199269	0.086	0.00221032	1.57675
Stress (mN/mm2) (37)	Differentiation Purity % - 90 to 94 (37)	0.00241431	0.677	0.00421803	0.3835	0.00331617	0.416235
Stress (mN/mm2) (37)	Max Capture Rate (Hz) Quantiles (15)	0.00240689	0.883	0.00204511	0.9255	0.002226	0.0540393
Stress (mN/mm2) (37)	Calcium Handling Analysis Method - Reported (124)	0.00230705	0.9585	0.00182531	0.9675	0.00206618	0.0184079
Stress (mN/mm2) (37)	hiPSC Backbone Media - mTeSR (102)	0.00222251	0.952	0.00211963	0.941	0.00217107	0.0264104
Stress (mN/mm2) (37)	Beat Rate (beats per minute) - Q2 (16)	0.00217886	0.2175	0.00600143	0.0185	0.00409015	1.73283
Stress (mN/mm2) (37)	Wnt Inhibitor - KY02111 (7)	0.00215605	0.0375	0.000840002	0.4295	0.00149802	1.42597
Stress (mN/mm2) (37)	Contractile Analysis Method - TFM (8)	0.00213288	0.4255	0.00321437	0.26	0.00267363	0.585027
Stress (mN/mm2) (37)	3D Endothelial Cell Type - HUVEC (9)	0.00212356	0.0565	0.00162292	0.1765	0.00187324	1.24795
Stress (mN/mm2) (37)	Wnt Inhibitor - IWR (54)	0.00211203	0.7265	0.00195859	0.787	0.00203531	0.138764
Stress (mN/mm2) (37)	Differentiation Purity Assessment - Reported (167)	0.00210571	0.922	0.00344619	0.723	0.00277595	0.140862
Stress (mN/mm2) (37)	Wnt Inhibitor - Others (9)	0.00197136	0.0545	0.00134553	0.2335	0.00165845	1.2636
Stress (mN/mm2) (37)	Metabolic Maturation Strategy (Broad) - Growth Factors (4)	0.00196785	0.2895	0.00250286	0.251	0.00223536	0.600326
Stress (mN/mm2) (37)	Metabolic Analysis Method - Reported (45)	0.00194825	0.806	0.00117998	0.938	0.00156412	0.093665
Stress (mN/mm2) (37)	Induction Duration - 4 days (15)	0.00190011	0.0625	0.00435859	0.002	0.00312935	2.69897
Stress (mN/mm2) (37)	Ancestry of hiPSC Lines - Caucasian (42)	0.00187395	0.8525	0.00148765	0.9025	0.0016808	0.0693056
Stress (mN/mm2) (37)	Insulin Addition - Reported (175)	0.0018729	0.9605	0.00377787	0.732	0.00282538	0.135489
Stress (mN/mm2) (37)	T-tubules Observed (18)	0.00184423	0.662	0.00283094	0.495	0.00233758	0.305395
Stress (mN/mm2) (37)	3D Estimated Tissue Cell Density (10^6 cells/mL) Q1 <2.82 (40)	0.00183144	0.482	0.000487484	0.9335	0.00115946	0.316953
Stress (mN/mm2) (37)	hiPSC Line - 201B7 (9)	0.00183019	0.0585	0.00128423	0.232	0.00155721	1.23284
Stress (mN/mm2) (37)	Disease Modelling - Arrhythmogenic Cardiomyopathy (10)	0.00182785	0.5215	0.00139214	0.713	0.00161	0.282746
Stress (mN/mm2) (37)	hiPSC Backbone Media - Embryonic Stem Cell (20)	0.0017891	0.596	0.00388177	0.2375	0.00283543	0.624336
Stress (mN/mm2) (37)	Upstroke Velocity (um/s) - Q4 (9)	0.00178653	0.7285	0.00210931	0.6625	0.00194792	0.178814
Stress (mN/mm2) (37)	hiPSC Line - Cor.4U (16)	0.00177782	0.3315	0.00325415	0.1555	0.00251599	0.80827
Stress (mN/mm2) (37)	hiPSC-CM Media Supplement - Specialised (13)	0.00176706	0.326	0.00119143	0.6035	0.00147924	0.486782
Stress (mN/mm2) (37)	Calcium Handling Analysis Method - Genetical (23)	0.00171419	0.681	0.00217722	0.644	0.0019457	0.191114
Stress (mN/mm2) (37)	Time to Relaxation (ms) Quantiles (10)	0.00167635	0.371	0.00171926	0.428	0.00169781	0.430626
Stress (mN/mm2) (37)	hiPSC Backbone Media - StemFlex (5)	0.00162199	0.32	0.00343514	0.1065	0.00252857	0.97265
Stress (mN/mm2) (37)	Conduction Velocity (cm/s) - Reported (14)	0.00161656	0.6075	0.00175244	0.658	0.0016845	0.216454
Stress (mN/mm2) (37)	Metabolic Analysis Method - Specialised (8)	0.00159299	0.382	0.000653335	0.772	0.00112316	0.417937
Stress (mN/mm2) (37)	Differentiation Purity % - <60 (9)	0.00159078	0.3965	0.00407064	0.072	0.00283071	1.14267
Stress (mN/mm2) (37)	Differentiation Purity % - 60 to 69 (5)	0.00158315	0.597	0.00214212	0.521	0.00186264	0.283162
Stress (mN/mm2) (37)	hiPSC Line - iCell2 (8)	0.00158065	0.375	0.000510697	0.8115	0.00104568	0.425969
Stress (mN/mm2) (37)	Time to Peak (ms) - Reported (41)	0.00157587	0.948	0.00148809	0.946	0.00153198	0.0241089
Stress (mN/mm2) (37)	3D Estimated Tissue Size (mm2) Q1 <0.28 (34)	0.00153901	0.344	0.00117015	0.57	0.00135458	0.463442
Stress (mN/mm2) (37)	hiPSC Line - PGP1 (11)	0.00149903	0.136	0.00185119	0.1145	0.00167511	0.941195
Stress (mN/mm2) (37)	Sarcomere Length (um) - Mature Q2 1.7 to 1.9 (28)	0.00149284	0.8025	0.0018199	0.7455	0.00165637	0.127552
Stress (mN/mm2) (37)	Induction Conditions - Reported (238)	0.00147812	0.611	0	0.9545	0.00147812	0.213959
Stress (mN/mm2) (37)	Metabolic Maturation Strategy - Dexamethasone (7)	0.00144431	0.4225	0.00395777	0.084	0.00270104	1.07572
Stress (mN/mm2) (37)	Time to Relaxation (ms) - Q1 (5)	0.00143597	0.468	0.00175021	0.48	0.00159309	0.329754
Stress (mN/mm2) (37)	3D Platform - Gelatin (6)	0.00142752	0.1305	0	0.6915	0.00142752	0.884389
Stress (mN/mm2) (37)	hiPSC-CM Backbone Media - DMEM (18)	0.00141709	0.366	0.00155292	0.4355	0.00148501	0.436519
Stress (mN/mm2) (37)	hiPSC-CM Backbone Media - iCell Maintenance Medium (86)	0.00139951	0.941	0.00218489	0.8365	0.0017922	0.0775341
Stress (mN/mm2) (37)	hiPSC Line - 201B6 (3)	0.00138726	0.6135	0.00218646	0.4795	0.00178686	0.319211
Stress (mN/mm2) (37)	Beat Rate (beats per minute) - Reported (54)	0.00137724	0.815	0.00158309	0.814	0.00148017	0.0893756
Stress (mN/mm2) (37)	Time to Peak (ms) - Q2 (10)	0.00137417	0.7655	0.00230012	0.585	0.00183714	0.232844
Stress (mN/mm2) (37)	Induction Duration - Reported (230)	0.00136667	0.748	0.00206879	0.6575	0.00171773	0.182104
Stress (mN/mm2) (37)	Sarcomere Length (um) Q3 >1.9 (17)	0.00136604	0.623	0.000965502	0.8095	0.00116577	0.205512
Stress (mN/mm2) (37)	hiPSC-CM Maintenance/Maturation Media (if different) - DMEM/F12 (6)	0.00136382	0.217	0.00334607	0.025	0.00235494	1.60206
Stress (mN/mm2) (37)	3D EC % Composition - Reported (150)	0.00132149	0.8465	0	0.989	0.00132149	0.072373
Stress (mN/mm2) (37)	Beat Rate (beats per minute) - Q4 (13)	0.00129743	0.439	0.000541992	0.7955	0.00091971	0.357535
Stress (mN/mm2) (37)	Disease Modelling - Left Ventricular (15)	0.0012595	0.635	0.00115731	0.732	0.00120841	0.197226
Stress (mN/mm2) (37)	hiPSC Backbone Media - DMEM (10)	0.00125691	0.66	0.000848834	0.834	0.00105287	0.180456
Stress (mN/mm2) (37)	Force (mN) - Q1 (13)	0.00123956	0.161	0.00119958	0.288	0.00121957	0.793174
Stress (mN/mm2) (37)	Conduction Velocity (cm/s) - Q1 (7)	0.00123779	0.497	0.0014585	0.503	0.00134814	0.303644
Stress (mN/mm2) (37)	3D EC % Composition - >9 (30)	0.00123226	0.791	0.00111643	0.8625	0.00117434	0.101824
Stress (mN/mm2) (37)	Differentiation Purity % - 70 to 74 (10)	0.0012179	0.2145	0.00283363	0.0305	0.00202577	1.5157
Stress (mN/mm2) (37)	Metabolic Maturation Strategy - IGF-1 (3)	0.00121432	0.498	0.00238762	0.284	0.00180097	0.546682
Stress (mN/mm2) (37)	3D Tissue Media - High-glucose DMEM (7)	0.00120881	0.7835	0.00454072	0.201	0.00287477	0.696804
Stress (mN/mm2) (37)	Resting Membrane Potential (mV) Quantiles (44)	0.00120671	0.941	0.00122245	0.958	0.00121458	0.0264104
Stress (mN/mm2) (37)	Gene Analysis Method - PCR (131)	0.00119484	0.9965	0.00327162	0.8725	0.00223323	0.0592346
Stress (mN/mm2) (37)	Metabolic Maturation Strategy - T3 (14)	0.00116765	0.481	0.00301773	0.122	0.00209269	0.91364
Stress (mN/mm2) (37)	hiPSC-CM Backbone Media - Cor.4U Complete Medium (6)	0.00116707	0.216	0.00116221	0.298	0.00116464	0.665546
Stress (mN/mm2) (37)	Wnt Inhibition Duration - >6 days (12)	0.00115113	0.17	0.00122249	0.204	0.00118681	0.769551
Stress (mN/mm2) (37)	hiPSC-CM Maintenance/Maturation Media (if different) - DMEM (11)	0.00113944	0.1945	0.00109303	0.297	0.00111624	0.71108
Stress (mN/mm2) (37)	hiPSC-CM Media Supplement - Reported (275)	0.00113552	0.4395	0.00114491	0.522	0.00114022	0.357041
Stress (mN/mm2) (37)	Conduction Velocity (cm/s) Quantiles (14)	0.00110772	0.7345	0.00123208	0.7785	0.0011699	0.134008
Stress (mN/mm2) (37)	Wnt Inhibition Duration - 1 day (12)	0.00108479	0.2735	0.00201086	0.109	0.00154782	0.962574
Stress (mN/mm2) (37)	3D Platform - Decellularised (15)	0.00103411	0.2605	0	0.7705	0.00103411	0.584192
Stress (mN/mm2) (37)	Max Capture Rate (Hz) - Q1 (8)	0.00101004	0.5495	0.00150859	0.4885	0.00125932	0.311135
Stress (mN/mm2) (37)	3D Stromal Cell Type - Specialised (11)	0.000987578	0.5905	0.000924433	0.6685	0.000956005	0.22878
Stress (mN/mm2) (37)	3D Platform - Reported (154)	0.000945874	0.947	0.00104578	0.9405	0.000995827	0.0266412
Stress (mN/mm2) (37)	AP Conduction Velocity (cm/s) - Q3 (6)	0.000942186	0.5905	0	0.911	0.000942186	0.22878
Stress (mN/mm2) (37)	3D Tissue Media - MEM-α (6)	0.000930842	0.2985	0.000921934	0.4155	0.000926388	0.525056
Stress (mN/mm2) (37)	Induction Conditions - Specialised (5)	0.000886632	0.3335	0.00183486	0.1275	0.00136074	0.89449
Stress (mN/mm2) (37)	3D CM % Composition - Reported (150)	0.000880943	0.9465	0.00161295	0.865	0.00124694	0.0629839
Stress (mN/mm2) (37)	Disease Modelling - Genetic Disorders (23)	0.00086084	0.7765	0.00150431	0.6465	0.00118258	0.189431
Stress (mN/mm2) (37)	Resting Membrane Potential (mV) - Reported (44)	0.000840137	0.935	0.00192715	0.7865	0.00138364	0.104301
Stress (mN/mm2) (37)	Metabolic Maturation Strategy - Specialised (9)	0.000838264	0.3015	0.000469727	0.6755	0.000653995	0.520713
Stress (mN/mm2) (37)	Disease Modelling - Arrhythmic (15)	0.000832859	0.798	0.00242621	0.406	0.00162954	0.391474
Stress (mN/mm2) (37)	hiPSC-CM Matrix Coating if Replated - Synthemax (3)	0.000827865	0.318	0	0.7015	0.000827865	0.497573
Stress (mN/mm2) (37)	3D SC % Composition - Reported (150)	0.000824306	0.9295	0.00247337	0.6735	0.00164884	0.171662
Stress (mN/mm2) (37)	Metabolic Maturation Strategy - Palmitic Acid (10)	0.000800583	0.791	0.000656465	0.862	0.000728524	0.101824
Stress (mN/mm2) (37)	Differentiation Purity Assessment - IHC a-actinin (8)	0.000795884	0.338	0.000588437	0.5455	0.00069216	0.471083
Stress (mN/mm2) (37)	2D % Confluency - 90 to 94 (10)	0.000770194	0.348	0	0.703	0.000770194	0.458421
Stress (mN/mm2) (37)	Pharmacological Interventions - Specialised (16)	0.000765547	0.6195	0.0021364	0.275	0.00145097	0.560667
Stress (mN/mm2) (37)	Metabolic Maturation Strategy - Linoleic/Oleic Acid (4)	0.000758889	0.347	0.00157063	0.1665	0.00116476	0.778586
Stress (mN/mm2) (37)	hiPSC-CM Matrix Coating if Replated - Geltrex (10)	0.000754859	0.662	0.00205838	0.315	0.00140662	0.501689
Stress (mN/mm2) (37)	Resting Membrane Potential (mV) - Q2 (13)	0.000740339	0.3835	0.000557308	0.616	0.000648824	0.416235
Stress (mN/mm2) (37)	Induction Duration - 5 days (8)	0.000729332	0.663	0.00128439	0.537	0.00100686	0.270026
Stress (mN/mm2) (37)	Metabolic Analysis Method - Seahorse (35)	0.000726676	0.9275	0.00143072	0.8315	0.0010787	0.0801377
Stress (mN/mm2) (37)	Disease Modelling - Fibrotic (3)	0.000679661	0.6545	0.000579256	0.772	0.000629459	0.18409
Stress (mN/mm2) (37)	hiPSC Line - IMR90 (19)	0.00067884	0.871	0.00048461	0.942	0.000581725	0.0599818
Stress (mN/mm2) (37)	Resting Membrane Potential (mV) - Q4 (9)	0.00067863	0.6935	0	0.8825	0.00067863	0.158954
Stress (mN/mm2) (37)	Metabolic Maturation Strategy (Broad) - Hormonal Stimulation (15)	0.000655892	0.7175	0.00120693	0.571	0.000931412	0.243364
Stress (mN/mm2) (37)	Disease Modelling - HCM (6)	0.000638291	0.463	0.00107087	0.3995	0.00085458	0.398483
Stress (mN/mm2) (37)	hiPSC Line - SCVI-273 (8)	0.000635651	0.437	0.00218278	0.086	0.00140922	1.0655
Stress (mN/mm2) (37)	Sarcomere Length (um) Q1 <1.7 (19)	0.00061562	0.4465	0.00046682	0.6825	0.00054122	0.350179
Stress (mN/mm2) (37)	Wnt Inhibitor - Reported (227)	0.000613625	0.9485	0	0.9825	0.000613625	0.0229627
Stress (mN/mm2) (37)	Wnt Inhibitor - VEGF (3)	0.000611638	0.374	0.000642361	0.472	0.000626999	0.427128
Stress (mN/mm2) (37)	AP Amplitude (mV) - Q1 (11)	0.000602565	0.43	0.00103867	0.3525	0.000820618	0.452841
Stress (mN/mm2) (37)	2D % Confluency - 85 to 89 (31)	0.000594052	0.738	0.000744688	0.7415	0.00066937	0.131944
Stress (mN/mm2) (37)	hiPSC-CM Media Supplement - iCell Maintenance Medium (41)	0.000580795	0.4425	0.00204457	0.0835	0.00131268	1.07831
Stress (mN/mm2) (37)	Metabolic Maturation Strategy (Broad) - Metabolic Modulation (19)	0.000571368	0.8975	0.00163366	0.686	0.00110251	0.163676
Stress (mN/mm2) (37)	Pharmacological Interventions - Phenylephrine (3)	0.000559252	0.531	0.000337728	0.764	0.00044849	0.274905
Stress (mN/mm2) (37)	Electrophysiology Analysis Method - Genetical (3)	0.000541117	0.4965	0	0.697	0.000541117	0.304081
Stress (mN/mm2) (37)	3D Tissue Media - StemPro-34 (4)	0.000493114	0.497	0.000766732	0.4375	0.000629923	0.359022
Stress (mN/mm2) (37)	3D Platform - Scaffold Free (43)	0.000489231	0.889	0.00054626	0.8995	0.000517746	0.0510982
Stress (mN/mm2) (37)	Metabolic Maturation Strategy (Broad) - Fatty Acid and Lipids (19)	0.000464703	0.9105	0.000595573	0.916	0.000530138	0.04072
Stress (mN/mm2) (37)	hiPSC Line - ATCC (5)	0.000463184	0.5535	0.000565173	0.618	0.000514179	0.256882
Stress (mN/mm2) (37)	Differentiation Purity % - 80 to 84 (25)	0.000440688	0.905	0.00135963	0.7225	0.000900161	0.141162
Stress (mN/mm2) (37)	Metabolic Maturation Strategy - Galactose (3)	0.00041486	0.796	0	0.9135	0.00041486	0.0990869
Stress (mN/mm2) (37)	hiPSC-CM Matrix Coating if Replated - Gelatin (43)	0.00039981	0.6	0.00052174	0.569	0.000460775	0.244888
Stress (mN/mm2) (37)	AP Amplitude (mV) - Q2 (10)	0.000379444	0.599	0.00259212	0.0455	0.00148578	1.34199
Stress (mN/mm2) (37)	Disease Modelling - DCM (5)	0.000376346	0.622	0.00048461	0.6845	0.000430478	0.20621
Stress (mN/mm2) (37)	hiPSC-CM Media Supplement - FBS (16)	0.000375858	0.836	0.00065404	0.7495	0.000514949	0.125228
Stress (mN/mm2) (37)	Number of hiPSC Lines - 3 (27)	0.000373383	0.6135	0	0.731	0.000373383	0.212185
Stress (mN/mm2) (37)	Resting Membrane Potential (mV) - Q3 (11)	0.000373383	0.851	0	0.919	0.000373383	0.0700704
Stress (mN/mm2) (37)	3D Stromal Cell Type - SMC (3)	0.00031893	0.6165	0	0.732	0.00031893	0.210067
Stress (mN/mm2) (37)	Differentiation Purity Assessment - Flow Cytometry a-actinin+ (9)	0.000282572	0.6305	0.000648554	0.5295	0.000465563	0.276134
Stress (mN/mm2) (37)	Beat Rate (beats per minute) - Q1 (15)	0.000272866	0.6295	0.000363458	0.6915	0.000318162	0.201004
Stress (mN/mm2) (37)	Metabolic Maturation Strategy (Broad) - Amino Acids and Derivatives (5)	0.000258604	0.6575	0.000494322	0.6565	0.000376463	0.182765
Stress (mN/mm2) (37)	Wnt Inhibitor - Wnt-C59 (28)	0.000237967	0.9835	0	0.984	0.000237967	0.00722564
Stress (mN/mm2) (37)	Purification Duration - 3 days (12)	0.000222098	0.8755	0.000485564	0.8745	0.000353831	0.0582402
Stress (mN/mm2) (37)	Extracellular Matrix Maturation (18)	0.000158695	0.6915	0.000122842	0.749	0.000140768	0.160208
Stress (mN/mm2) (37)	Disease Modelling - Myocardium (11)	0.00015625	0.889	0.000479883	0.8695	0.000318066	0.0607304
Stress (mN/mm2) (37)	hiPSC-CM Backbone Media - Reported (301)	0.000117677	0.8545	0.00112121	0.552	0.000619445	0.258061
Stress (mN/mm2) (37)	Metabolic Maturation Strategy (Broad) - Sugar and Carbohydrates (7)	0	0.8735	0.000325728	0.8985	0.000325728	0.0587371
Stress (mN/mm2) (37)	3D % Confluency - 90 to 94 (11)	0	0.6265	0.00033437	0.6805	0.00033437	0.203079
Stress (mN/mm2) (37)	hiPSC-CM Media Supplement - HEPES (16)	0	0.7215	0.000421549	0.7275	0.000421549	0.141764
Stress (mN/mm2) (37)	Pharmacological Interventions - Doxorubicin (17)	0	0.6845	0.000488748	0.674	0.000488748	0.17134
Stress (mN/mm2) (37)	Number of hiPSC Lines - >5 (8)	0	0.6715	0.000588008	0.5745	0.000588008	0.24071
Stress (mN/mm2) (37)	Amplitude (F/F0) - Q2 (13)	0	0.6705	0.000637303	0.5525	0.000637303	0.257668
Stress (mN/mm2) (37)	Time to Peak (ms) - Q1 (11)	0	0.9455	0.000674658	0.8725	0.000674658	0.0592346
Stress (mN/mm2) (37)	Conduction Velocity (cm/s) - Q2 (7)	0	0.6395	0.000834578	0.4175	0.000834578	0.379344
Stress (mN/mm2) (37)	Differentiation Purity % - 75 to 79 (8)	0	0.6705	0.000852372	0.4445	0.000852372	0.352128
Stress (mN/mm2) (37)	Wnt Inhibition Duration - 5 days (6)	0	0.6585	0.000952833	0.3755	0.000952833	0.42539
Stress (mN/mm2) (37)	AP Amplitude (mV) - Reported(40)	0	0.951	0.00100149	0.79	0.00100149	0.102373
Stress (mN/mm2) (37)	hiPSC-CM Matrix Coating if Replated - Laminin (5)	0	0.6525	0.00102737	0.344	0.00102737	0.463442
Stress (mN/mm2) (37)	3D Tissue Media - Cor.4U (3)	0	0.658	0.00110246	0.3205	0.00110246	0.494172
Stress (mN/mm2) (37)	Time to Peak (ms) - Q3 (10)	0	0.658	0.00128965	0.283	0.00128965	0.548214
Stress (mN/mm2) (37)	Pharmacological Interventions - E4031 (22)	0	0.6545	0.00163612	0.1895	0.00163612	0.722391
Stress (mN/mm2) (37)	Force (mN) - Q2 (12)	0	0.8655	0.00211682	0.2785	0.00211682	0.555175
Stress (mN/mm2) (37)	Number of hiPSC Lines - 4 (10)	0	0.8875	0.00407298	0.085	0.00407298	1.07058
Upstroke Velocity (um/s) (40)	Amplitude (F/F0) Quantiles (50)	0.0239166	0.021	0.0175766	0.0595	0.0207466	1.67778
Upstroke Velocity (um/s) (40)	Amplitude (F/F0) - Reported (50)	0.021969	0.006	0.0159407	0.015	0.0189549	2.22185
Upstroke Velocity (um/s) (40)	Purification Stategy - Reported (101)	0.0209274	0.028	0.011782	0.1175	0.0163547	1.55284
Upstroke Velocity (um/s) (40)	Induction Conditions - Activin A (75)	0.0146415	0.049	0.00799174	0.2245	0.0113166	1.3098
Upstroke Velocity (um/s) (40)	Elastomeric Maturation (33)	0.0137325	0.034	0.0125215	0.0385	0.013127	1.46852
Upstroke Velocity (um/s) (40)	Electrophysiology Analysis Method - Optical Mapping (39)	0.0130738	0.003	0.0106732	0.0085	0.0118735	2.52288
Upstroke Velocity (um/s) (40)	Contractile Analysis Method - Post Deflection (39)	0.0126621	0.014	0.0122847	0.017	0.0124734	1.85387
Upstroke Velocity (um/s) (40)	Induction Duration - 2 days (71)	0.0118709	0.1165	0.00997205	0.1395	0.0109215	0.933674
Upstroke Velocity (um/s) (40)	Stress (mN/mm2) - Reported (37)	0.0115941	0.0205	0.0104348	0.031	0.0110144	1.68825
Upstroke Velocity (um/s) (40)	Time to Peak (ms) Quantiles (41)	0.0115192	0.1125	0.00797353	0.373	0.00974636	0.948847
Upstroke Velocity (um/s) (40)	Sarcomere Length (um) Quantiles (64)	0.0114715	0.4175	0.0140526	0.1975	0.0127621	0.704433
Upstroke Velocity (um/s) (40)	CM Immunofluorescent Imaging (261)	0.0114311	0.002	0.00888784	0.0195	0.0101595	2.69897
Upstroke Velocity (um/s) (40)	hiPSC-CM Maintenance/Maturation Media (if different) - RPMI-1640 (26)	0.011192	0.016	0.0068617	0.113	0.00902686	1.79588
Upstroke Velocity (um/s) (40)	hiPSC-CM Matrix Coating if Replated - Reported (152)	0.0102021	0.2395	0.00746496	0.347	0.00883354	0.620694
Upstroke Velocity (um/s) (40)	hiPSC-CM Maintenance/Maturation Media (if different) - Reported (51)	0.00998655	0.0385	0.0119328	0.018	0.0109597	1.74473
Upstroke Velocity (um/s) (40)	Tension Maturation (64)	0.00983873	0.067	0.00937286	0.0715	0.0096058	1.17393
Upstroke Velocity (um/s) (40)	Other Cells Maturation (77)	0.00969661	0.2095	0.0056064	0.506	0.0076515	0.678816
Upstroke Velocity (um/s) (40)	Wnt Inhibitor - IWR (54)	0.00967402	0.1545	0.00738273	0.25	0.00852838	0.811072
Upstroke Velocity (um/s) (40)	3D Estimated Tissue Size (mm2) Quantiles (133)	0.00963282	0.5365	0.0102903	0.4155	0.00996154	0.381429
Upstroke Velocity (um/s) (40)	Differentiation Purity Assessment - Flow Cytometry cTnT+ (134)	0.00948959	0.263	0.00869111	0.243	0.00909035	0.614394
Upstroke Velocity (um/s) (40)	3D Estimated Tissue Cell Density (10^6 cells/mL) Quantiles (120)	0.00940216	0.6525	0.00739298	0.789	0.00839757	0.185419
Upstroke Velocity (um/s) (40)	Contractile Analysis Method - Motion Tracking (88)	0.00925787	0.1195	0.00424736	0.55	0.00675261	0.922632
Upstroke Velocity (um/s) (40)	Purification Stategy - Glucose & Lactate (85)	0.00917798	0.351	0.00905302	0.273	0.0091155	0.563837
Upstroke Velocity (um/s) (40)	Number of hiPSC Lines - 1 (218)	0.00912988	0.2355	0.0087534	0.1805	0.00894164	0.743523
Upstroke Velocity (um/s) (40)	Force (mN) - Q1 (13)	0.00904089	0.037	0.00829401	0.0535	0.00866745	1.4318
Upstroke Velocity (um/s) (40)	3D SC % Composition - <25 (120)	0.00899356	0.2555	0.00910181	0.169	0.00904769	0.772113
Upstroke Velocity (um/s) (40)	3D CM % Composition - Reported (150)	0.00884333	0.354	0.0104246	0.1725	0.00963397	0.763211
Upstroke Velocity (um/s) (40)	3D Tissue Media - RPMI-1640 (71)	0.00859601	0.3715	0.0124272	0.0975	0.0105116	1.011
Upstroke Velocity (um/s) (40)	3D Tissue Media - B27 (67)	0.00850069	0.359	0.0116071	0.111	0.0100539	0.954677
Upstroke Velocity (um/s) (40)	hiPSC-CM Backbone Media - iCell Maintenance Medium (86)	0.00842666	0.1055	0.00986951	0.06	0.00914808	1.22185
Upstroke Velocity (um/s) (40)	Number of hiPSC Lines - 2 (50)	0.00833598	0.124	0.00923065	0.08	0.00878332	1.09691
Upstroke Velocity (um/s) (40)	Cell Alignment Maturation (55)	0.00832496	0.278	0.00742895	0.2815	0.00787695	0.555955
Upstroke Velocity (um/s) (40)	3D Tissue Media - DMEM (53)	0.00815021	0.22	0.00923142	0.1055	0.00869081	0.976748
Upstroke Velocity (um/s) (40)	hiPSC Backbone Media - mTeSR (102)	0.00776266	0.34	0.00863799	0.2035	0.00820032	0.691436
Upstroke Velocity (um/s) (40)	3D Tissue Media - Reported (157)	0.00763407	0.287	0.0054359	0.464	0.00653498	0.542118
Upstroke Velocity (um/s) (40)	Electrophysiology Analysis Method - Reported (117)	0.00758141	0.342	0.00713675	0.3205	0.00735908	0.494172
Upstroke Velocity (um/s) (40)	3D EC % Composition - Reported (150)	0.00743869	0.396	0.00630032	0.4185	0.00686951	0.402305
Upstroke Velocity (um/s) (40)	Purification Duration - Reported (88)	0.00737536	0.489	0.00598532	0.5575	0.00668034	0.310691
Upstroke Velocity (um/s) (40)	Differentiation Purity % - Reported (153)	0.00729844	0.46	0.00503633	0.6235	0.00616738	0.337242
Upstroke Velocity (um/s) (40)	hiPSC Backbone Media - Essential 8 (82)	0.00729643	0.4825	0.00602526	0.495	0.00666084	0.316503
Upstroke Velocity (um/s) (40)	2D Surface - Reported (137)(177)	0.00721531	0.4425	0.00265691	0.902	0.00493611	0.354087
Upstroke Velocity (um/s) (40)	Metabolic Maturation Strategy (Broad) - Known (30)	0.0070677	0.085	0.00338551	0.4695	0.0052266	1.07058
Upstroke Velocity (um/s) (40)	hiPSC-CM Matrix Coating if Replated - Matrigel (64)	0.0067873	0.4135	0.00872895	0.1755	0.00775812	0.755723
Upstroke Velocity (um/s) (40)	3D CM % Composition - >74 (115)	0.00675617	0.483	0.00621526	0.461	0.00648571	0.336299
Upstroke Velocity (um/s) (40)	3D % Confluency - Reported (239)	0.00673729	0.2745	0.00742558	0.191	0.00708144	0.718967
Upstroke Velocity (um/s) (40)	Resting Membrane Potential (mV) Quantiles (44)	0.00667857	0.3185	0.00345599	0.819	0.00506728	0.496891
Upstroke Velocity (um/s) (40)	3D Platform - Polyethylene Glycol (8)	0.00656916	0.025	0.00405211	0.173	0.00531064	1.60206
Upstroke Velocity (um/s) (40)	hiPSC-CM Media Supplement - Reported (275)	0.00639114	0.1	0.00416767	0.293	0.0052794	1
Upstroke Velocity (um/s) (40)	Wnt Inhibitor - Reported (227)	0.0063855	0.116	0.00577427	0.172	0.00607988	0.935542
Upstroke Velocity (um/s) (40)	Beat Rate (beats per minute) - Reported (54)	0.00627351	0.25	0.00137197	0.947	0.00382274	0.60206
Upstroke Velocity (um/s) (40)	Beat Rate (beats per minute) Quantiles (54)	0.00598511	0.553	0.00786837	0.317	0.00692674	0.498941
Upstroke Velocity (um/s) (40)	Electrophysiology Analysis Method - Patch Clamp (55)	0.00590833	0.328	0.00100322	0.9705	0.00345577	0.484126
Upstroke Velocity (um/s) (40)	Pharmacological Interventions - Reported (141)	0.00584177	0.55	0.00573792	0.453	0.00578984	0.343902
Upstroke Velocity (um/s) (40)	Gene Analysis Method - Reported (167)	0.00577263	0.687	0.0102297	0.185	0.00800117	0.732828
Upstroke Velocity (um/s) (40)	Metabolic Analysis Method - Seahorse (35)	0.00557752	0.295	0.00358047	0.594	0.00457899	0.530178
Upstroke Velocity (um/s) (40)	Calcium Handling Analysis Method - Dye (99)	0.00553017	0.5355	0.00349239	0.7545	0.00451128	0.271241
Upstroke Velocity (um/s) (40)	Measured Fatty Acid Metabolism (18)	0.00552806	0.0285	0.00371144	0.157	0.00461975	1.54516
Upstroke Velocity (um/s) (40)	Metabolic Maturation Strategy - Palmitic Acid (10)	0.00541289	0.0075	0.00671459	0.0035	0.00606374	2.45593
Upstroke Velocity (um/s) (40)	3D % Confluency - 2D/3D Values (154)	0.00538506	0.716	0.00303314	0.904	0.0042091	0.145087
Upstroke Velocity (um/s) (40)	3D SC % Composition - Reported (150)	0.00537016	0.6425	0.00384013	0.7575	0.00460514	0.192127
Upstroke Velocity (um/s) (40)	Ancestry of hiPSC Lines - Known (71)	0.00531059	0.596	0.00544408	0.489	0.00537733	0.310691
Upstroke Velocity (um/s) (40)	Induction Duration - 4 days (15)	0.00529339	0.1025	0.00410467	0.2305	0.00469903	0.989276
Upstroke Velocity (um/s) (40)	Induction Duration - 1 days (99)	0.00525837	0.5945	0.00532391	0.5115	0.00529114	0.291154
Upstroke Velocity (um/s) (40)	Insulin Addition - prior Day 8 (149)	0.00520602	0.6755	0.00267322	0.9145	0.00393962	0.170375
Upstroke Velocity (um/s) (40)	hiPSC Line - WTC11 (30)	0.00518753	0.4525	0.0031848	0.743	0.00418617	0.344381
Upstroke Velocity (um/s) (40)	3D Estimated Tissue Cell Density (10^6 cells/mL) Q2 2.82 to 10.8 (40)	0.0050713	0.444	0.00354511	0.664	0.0043082	0.352617
Upstroke Velocity (um/s) (40)	Sex of hiPSC Lines - Male (64)	0.005059	0.6585	0.00557901	0.494	0.005319	0.306273
Upstroke Velocity (um/s) (40)	Gene Analysis Method - RNA (57)	0.00504473	0.4925	0.00436222	0.574	0.00470347	0.307594
Upstroke Velocity (um/s) (40)	Resting Membrane Potential (mV) - Q3 (11)	0.00499041	0.057	0.00596531	0.05	0.00547786	1.30103
Upstroke Velocity (um/s) (40)	Gene Analysis Method - PCR (131)	0.00494404	0.7445	0.00623647	0.464	0.00559025	0.333482
Upstroke Velocity (um/s) (40)	Time to Peak (ms) - Reported (41)	0.00492494	0.5025	0.00518439	0.423	0.00505467	0.37366
Upstroke Velocity (um/s) (40)	Beat Rate (beats per minute) - Q1 (15)	0.00490553	0.158	0.0064833	0.0845	0.00569442	1.07314
Upstroke Velocity (um/s) (40)	3D Platform - 3D printed (9)	0.00485815	0.0745	0.00264714	0.382	0.00375264	1.12784
Upstroke Velocity (um/s) (40)	Pharmacological Interventions - Verapamil (27)	0.00484422	0.232	0.00176852	0.7765	0.00330637	0.634512
Upstroke Velocity (um/s) (40)	3D SC % Composition - >24 (30)	0.00469687	0.2615	0.00384358	0.3955	0.00427023	0.582528
Upstroke Velocity (um/s) (40)	Sarcomere Length (um) - Mature Q2 1.7 to 1.9 (28)	0.00468957	0.4145	0.00593646	0.235	0.00531301	0.628932
Upstroke Velocity (um/s) (40)	3D EC % Composition - <10 (120)	0.00468118	0.74	0.0035984	0.813	0.00413979	0.130768
Upstroke Velocity (um/s) (40)	3D Stromal Cell Type - hCF (30)	0.00446296	0.26	0.00537837	0.1835	0.00492067	0.736364
Upstroke Velocity (um/s) (40)	3D Stromal Cell Type - Reported (77)	0.00445216	0.6965	0.00816957	0.2245	0.00631086	0.648784
Upstroke Velocity (um/s) (40)	Force (mN) Quantiles (48)	0.00443139	0.7785	0.0073171	0.386	0.00587425	0.413413
Upstroke Velocity (um/s) (40)	Differentiation Purity % - 90 to 94 (37)	0.00441148	0.541	0.00453535	0.4905	0.00447341	0.309361
Upstroke Velocity (um/s) (40)	Stress (mN/mm2) Quantiles (37)	0.00438663	0.5845	0.00433909	0.6565	0.00436286	0.233215
Upstroke Velocity (um/s) (40)	Differentiation Purity Assessment - Reported (167)	0.00437688	0.7725	0.002835	0.887	0.00360594	0.112102
Upstroke Velocity (um/s) (40)	Time to Peak (ms) - Q1 (11)	0.00437577	0.1005	0.00239733	0.4235	0.00338655	0.997834
Upstroke Velocity (um/s) (40)	Ancestry of hiPSC Lines - Caucasian (42)	0.00431211	0.301	0.00311058	0.518	0.00371135	0.521434
Upstroke Velocity (um/s) (40)	AP Amplitude (mV) Quantiles (40)	0.00425965	0.5105	0.00313325	0.791	0.00369645	0.292004
Upstroke Velocity (um/s) (40)	hiPSC-CM Matrix Coating if Replated - Gelatin (43)	0.00421392	0.1925	0.00432888	0.2175	0.0042714	0.715569
Upstroke Velocity (um/s) (40)	Calcium Handling Analysis Method - Reported (124)	0.00418432	0.785	0.00362425	0.7695	0.00390428	0.113791
Upstroke Velocity (um/s) (40)	hiPSC-CM Media Supplement - 1-thioglycerol (14)	0.00418401	0.252	0.00265389	0.55	0.00341895	0.598599
Upstroke Velocity (um/s) (40)	Sex of hiPSC Lines - Known (116)	0.00416	0.8565	0.00331309	0.888	0.00373655	0.0672726
Upstroke Velocity (um/s) (40)	Pharmacological Interventions - Isoproterenol (70)	0.00405433	0.6235	0.0037581	0.6185	0.00390621	0.20866
Upstroke Velocity (um/s) (40)	Insulin Addition - Reported (175)	0.00404728	0.739	0.00501057	0.53	0.00452892	0.275724
Upstroke Velocity (um/s) (40)	Wnt Inhibitor - IWP (110)	0.00399108	0.8315	0.00464219	0.6475	0.00431664	0.18876
Upstroke Velocity (um/s) (40)	2D % Confluency - 2D/3D Values (154)	0.00397102	0.8435	0.00391619	0.756	0.0039436	0.121478
Upstroke Velocity (um/s) (40)	Amplitude (F/F0) - Q4 (12)	0.00393481	0.2955	0.00219604	0.6755	0.00306542	0.529443
Upstroke Velocity (um/s) (40)	Force (mN) - Q3 (11)	0.003877	0.0595	0.00228503	0.3535	0.00308102	1.22548
Upstroke Velocity (um/s) (40)	Sarcomere Length (um) Q3 >1.9 (17)	0.00370794	0.4755	0.00925021	0.051	0.00647907	1.29243
Upstroke Velocity (um/s) (40)	Stress (mN/mm2) - Q2 (9)	0.00370737	0.05	0.00215087	0.3035	0.00292912	1.30103
Upstroke Velocity (um/s) (40)	3D Platform - Reported (154)	0.00366584	0.854	0.00712279	0.315	0.00539432	0.501689
Upstroke Velocity (um/s) (40)	Disease Modelling - Reported (50)	0.00366579	0.372	0.00621692	0.1185	0.00494136	0.926282
Upstroke Velocity (um/s) (40)	hiPSC-CM Media Supplement - L-ascorbic acid (39)	0.00364796	0.587	0.00705609	0.1645	0.00535202	0.783834
Upstroke Velocity (um/s) (40)	3D Platform - Matrigel (32)	0.00363093	0.188	0.00464125	0.142	0.00413609	0.847712
Upstroke Velocity (um/s) (40)	hiPSC Line - Specialised (121)	0.00362903	0.889	0.00304637	0.886	0.0033377	0.0525663
Upstroke Velocity (um/s) (40)	Wnt Inhibitor - XAV939 (23)	0.00346177	0.2945	0.00319141	0.4135	0.00332659	0.530915
Upstroke Velocity (um/s) (40)	Purification Duration - 3 days (12)	0.00341174	0.1685	0.0032337	0.257	0.00332272	0.7734
Upstroke Velocity (um/s) (40)	2D Surface - Micropatterned (24)	0.00339564	0.444	0.00561209	0.1645	0.00450387	0.783834
Upstroke Velocity (um/s) (40)	3D Estimated Tissue Size (mm2) Q3 4 to 20 (33)	0.00339473	0.5325	0.00247708	0.7375	0.0029359	0.27368
Upstroke Velocity (um/s) (40)	3D Estimated Tissue Size (mm2) Q2 0.28 to 4 (34)	0.00338375	0.552	0.00158493	0.899	0.00248434	0.258061
Upstroke Velocity (um/s) (40)	Max Capture Rate (Hz) - Reported (15)	0.00337332	0.3025	0.00406398	0.27	0.00371865	0.568636
Upstroke Velocity (um/s) (40)	2D % Confluency - 85 to 89 (31)	0.00336169	0.4245	0.00334748	0.443	0.00335459	0.372122
Upstroke Velocity (um/s) (40)	hiPSC-CM Media Supplement - Albumin (23)	0.00333312	0.186	0.00412989	0.1475	0.00373151	0.831208
Upstroke Velocity (um/s) (40)	hiPSC-CM Media Supplement - B27 (174)	0.00324868	0.918	0.0012384	0.992	0.00224354	0.0371573
Upstroke Velocity (um/s) (40)	3D Estimated Tissue Size (mm2) Q1 <0.28 (34)	0.00322922	0.298	0.00219979	0.58	0.0027145	0.525784
Upstroke Velocity (um/s) (40)	Transmission Electron Microscopy (62)	0.00322817	0.6515	0.00388702	0.5075	0.0035576	0.294564
Upstroke Velocity (um/s) (40)	Metabolic Maturation Strategy - Reported (30)	0.00314184	0.482	0.00195336	0.767	0.0025476	0.316953
Upstroke Velocity (um/s) (40)	Force (mN) - Reported (48)	0.0031221	0.787	0.00522127	0.431	0.00417169	0.365523
Upstroke Velocity (um/s) (40)	hiPSC Line - SCVI-273 (8)	0.00311524	0.064	0.0047334	0.029	0.00392432	1.5376
Upstroke Velocity (um/s) (40)	Sarcomere/Cellular Alignment Analysis (67)	0.00310356	0.9305	0.00510235	0.6165	0.00410295	0.210067
Upstroke Velocity (um/s) (40)	Wnt Inhibition Duration - 3 days (17)	0.00310278	0.2195	0.00166303	0.636	0.0023829	0.658565
Upstroke Velocity (um/s) (40)	Scanning Electron Microscopy (21)	0.00306484	0.226	0.00281094	0.3305	0.00293789	0.645892
Upstroke Velocity (um/s) (40)	Induction Duration - Reported (230)	0.00305594	0.084	0.00462258	0.042	0.00383926	1.37675
Upstroke Velocity (um/s) (40)	Max Capture Rate (Hz) Quantiles (15)	0.00305173	0.382	0.00254506	0.546	0.00279839	0.417937
Upstroke Velocity (um/s) (40)	Pharmacological Interventions - Specialised (16)	0.00299289	0.007	0.00308473	0.011	0.00303881	2.1549
Upstroke Velocity (um/s) (40)	Pharmacological Interventions - Cisapride (5)	0.00298064	0.087	0.0028464	0.168	0.00291352	1.06048
Upstroke Velocity (um/s) (40)	2D % Confluency - Reported (236)	0.0029201	0.74	0.00114974	0.965	0.00203492	0.130768
Upstroke Velocity (um/s) (40)	2D Surface - ECM-coated (114)	0.0028791	0.891	0.00240819	0.8925	0.00264364	0.0501223
Upstroke Velocity (um/s) (40)	Metabolic Analysis Method - Reported (45)	0.00287182	0.593	0.00339564	0.5105	0.00313373	0.292004
Upstroke Velocity (um/s) (40)	hiPSC-CM Media Supplement - Transferrin (11)	0.00282239	0.1065	0.00133678	0.5255	0.00207958	0.97265
Upstroke Velocity (um/s) (40)	Ancestry of hiPSC Lines - Asian (30)	0.00277804	0.809	0.00458357	0.4865	0.0036808	0.312917
Upstroke Velocity (um/s) (40)	3D Stromal Cell Type - SC (34)	0.00276476	0.7685	0.00056751	0.9915	0.00166614	0.114356
Upstroke Velocity (um/s) (40)	Purification Duration - 4 days (28)	0.00275348	0.736	0.00196504	0.858	0.00235926	0.133122
Upstroke Velocity (um/s) (40)	hiPSC-CM Backbone Media - RPMI-1640 (161)	0.00272598	0.9355	0.00587303	0.5205	0.0042995	0.283579
Upstroke Velocity (um/s) (40)	Max Capture Rate (Hz) - Q1 (8)	0.00268545	0.4485	0.00331847	0.36	0.00300196	0.443697
Upstroke Velocity (um/s) (40)	3D EC % Composition - >9 (30)	0.00268267	0.4405	0.00289172	0.4385	0.0027872	0.35803
Upstroke Velocity (um/s) (40)	hiPSC Line - 253G1 (10)	0.00258634	0.4805	0.00233834	0.5945	0.00246234	0.318307
Upstroke Velocity (um/s) (40)	Metabolic Maturation Strategy (Broad) - Specialised (4)	0.00257608	0.1335	0.00216335	0.2845	0.00236972	0.874519
Upstroke Velocity (um/s) (40)	AP Conduction Velocity (cm/s) Quantiles (28)	0.00257562	0.328	0.00113089	0.7765	0.00185326	0.484126
Upstroke Velocity (um/s) (40)	Metabolic Maturation Strategy (Broad) - Metabolic Modulation (19)	0.00256721	0.146	0.0049084	0.032	0.00373781	1.49485
Upstroke Velocity (um/s) (40)	Electrical Maturation (38)	0.00256175	0.6185	0.0013263	0.9	0.00194402	0.20866
Upstroke Velocity (um/s) (40)	Induction Conditions - Reported (238)	0.00253108	0.292	0.00205385	0.4775	0.00229247	0.534617
Upstroke Velocity (um/s) (40)	3D Platform - Scaffold Free (43)	0.00250637	0.404	0.000911873	0.86	0.00170912	0.393619
Upstroke Velocity (um/s) (40)	2D Surface - Decellularized ECM (3)	0.00249969	0.025	0.00122368	0.2895	0.00186169	1.60206
Upstroke Velocity (um/s) (40)	3D Estimated Tissue Size (mm2) Q3 >20 (32)	0.00247116	0.2165	0.00380338	0.128	0.00313727	0.89279
Upstroke Velocity (um/s) (40)	Differentiation Purity % - 80 to 84 (25)	0.00245145	0.633	0.00378022	0.4125	0.00311583	0.384576
Upstroke Velocity (um/s) (40)	Time to Peak (ms) - Q2 (10)	0.00239222	0.4715	0.00224544	0.5575	0.00231883	0.326518
Upstroke Velocity (um/s) (40)	Pharmacological Interventions - Carbamylcholine (6)	0.00236173	0.0195	0.00244322	0.034	0.00240247	1.70997
Upstroke Velocity (um/s) (40)	Induction Conditions - bFGF (45)	0.00234518	0.7075	0.00391511	0.4315	0.00313015	0.365019
Upstroke Velocity (um/s) (40)	Calcium Handling Analysis Method - Genetical (23)	0.00233521	0.4955	0.00429735	0.2135	0.00331628	0.670602
Upstroke Velocity (um/s) (40)	Metabolic Maturation Strategy - T3 (14)	0.0023341	0.1395	0.00177247	0.357	0.00205329	0.855426
Upstroke Velocity (um/s) (40)	Metabolic Maturation (30)	0.00232732	0.6395	0.00125697	0.9085	0.00179215	0.194159
Upstroke Velocity (um/s) (40)	3D Platform - Gelatin (6)	0.00230735	0.302	0.00159598	0.59	0.00195167	0.519993
Upstroke Velocity (um/s) (40)	Purification Duration - 8 days (4)	0.00222407	0.0315	0.00114078	0.2885	0.00168242	1.50169
Upstroke Velocity (um/s) (40)	Metabolic Maturation Strategy - Dexamethasone (7)	0.00222013	0.1855	0.0014072	0.469	0.00181366	0.731656
Upstroke Velocity (um/s) (40)	AP Conduction Velocity (cm/s) - Reported (28)	0.00217355	0.452	0.000496704	0.942	0.00133513	0.344862
Upstroke Velocity (um/s) (40)	Mechanical Maturation (34)	0.00210739	0.7325	0.00316068	0.5685	0.00263403	0.24527
Upstroke Velocity (um/s) (40)	hiPSC-CM Backbone Media - Commercial Cardiomyocyte Kit (12)	0.00209794	0.354	0.00312267	0.1985	0.00261031	0.702239
Upstroke Velocity (um/s) (40)	Metabolic Maturation Strategy (Broad) - Glucocorticoids (7)	0.0020801	0.2225	0.00273471	0.174	0.00240741	0.759451
Upstroke Velocity (um/s) (40)	3D Platform - Nanotechnology (3)	0.00203551	0.044	0.00272912	0.0225	0.00238232	1.64782
Upstroke Velocity (um/s) (40)	Pharmacological Interventions - Blebbistatin (5)	0.00200911	0.0425	0.00134464	0.229	0.00167687	1.37161
Upstroke Velocity (um/s) (40)	3D Platform - Fibronectin (3)	0.00196531	0.05	0.00127413	0.2565	0.00161972	1.30103
Upstroke Velocity (um/s) (40)	hiPSC-CM Matrix Coating if Replated - Fibronectin (32)	0.00194325	0.442	0.00430846	0.1165	0.00312585	0.933674
Upstroke Velocity (um/s) (40)	3D Stromal Cell Type - Specialised (11)	0.00192852	0.0705	0.00129732	0.2785	0.00161292	1.15181
Upstroke Velocity (um/s) (40)	Pharmacological Interventions - Thalidomide (3)	0.00189885	0.086	0.00143268	0.2105	0.00166576	1.0655
Upstroke Velocity (um/s) (40)	Pharmacological Interventions - Doxorubicin (17)	0.00187842	0.091	0.00395047	0.0045	0.00291444	2.34679
Upstroke Velocity (um/s) (40)	3D % Confluency - 95 to 100 (15)	0.00182585	0.4435	0.00314008	0.252	0.00248296	0.598599
Upstroke Velocity (um/s) (40)	Amplitude (F/F0) - Q1 (13)	0.00172349	0.287	0.00291569	0.164	0.00231959	0.785156
Upstroke Velocity (um/s) (40)	Contractile Analysis Method - Specialised (6)	0.00171754	0.075	0.00444265	0.0005	0.00308009	3.30103
Upstroke Velocity (um/s) (40)	Disease Modelling - Left Ventricular (15)	0.0017153	0.2915	0.000962926	0.6435	0.00133911	0.535361
Upstroke Velocity (um/s) (40)	Differentiation Purity % - 95 to 100 (35)	0.00171129	0.684	0.00176928	0.7485	0.00174028	0.164944
Upstroke Velocity (um/s) (40)	Wnt Inhibition Duration - Reported (222)	0.00170318	0.3645	0.00198761	0.4015	0.0018454	0.438302
Upstroke Velocity (um/s) (40)	3D Platform - Decellularised (15)	0.00169867	0.61	0.00141469	0.7335	0.00155668	0.21467
Upstroke Velocity (um/s) (40)	3D Stromal Cell Type - hiPSC-CF (8)	0.00168781	0.3185	0.00215305	0.2835	0.00192043	0.547447
Upstroke Velocity (um/s) (40)	3D Estimated Tissue Cell Density (10^6 cells/mL) Q3 >10.8 (40)	0.00167047	0.879	0.00186504	0.842	0.00176776	0.0746879
Upstroke Velocity (um/s) (40)	Insulin Addition - Induction (172)	0.0016496	0.9765	0.000354866	0.9985	0.00100223	0.0103278
Upstroke Velocity (um/s) (40)	Insulin Addition - after Day 7 (26)	0.00163205	0.5435	0.00131815	0.713	0.0014751	0.2648
Upstroke Velocity (um/s) (40)	Beat Rate (beats per minute) - Q4 (13)	0.00162325	0.0775	0.00119247	0.277	0.00140786	1.1107
Upstroke Velocity (um/s) (40)	hiPSC-CM Matrix Coating if Replated - Geltrex (10)	0.00160852	0.546	0.00436533	0.1185	0.00298693	0.926282
Upstroke Velocity (um/s) (40)	Stress (mN/mm2) - Q3 (9)	0.00160118	0.0845	0.000939337	0.3715	0.00127026	1.07314
Upstroke Velocity (um/s) (40)	Beat Rate (beats per minute) - Q2 (16)	0.00159578	0.702	0.00173382	0.6935	0.0016648	0.158954
Upstroke Velocity (um/s) (40)	hiPSC Backbone Media - Embryonic Stem Cell (20)	0.00153944	0.735	0.00108441	0.872	0.00131193	0.133713
Upstroke Velocity (um/s) (40)	Sex of hiPSC Lines - Both (10)	0.00153266	0.077	0.00141327	0.1655	0.00147296	1.11351
Upstroke Velocity (um/s) (40)	hiPSC-CM Media Supplement - HEPES (16)	0.0014601	0.1605	0.00141291	0.2435	0.00143651	0.794525
Upstroke Velocity (um/s) (40)	AP Amplitude (mV) - Reported(40)	0.00144028	0.9035	0.00386306	0.435	0.00265167	0.361511
Upstroke Velocity (um/s) (40)	AP Amplitude (mV) - Q4 (10)	0.00143158	0.636	0.000451213	0.9355	0.000941395	0.196543
Upstroke Velocity (um/s) (40)	T-tubules Observed (18)	0.00142651	0.751	0.0024445	0.5475	0.00193551	0.261616
Upstroke Velocity (um/s) (40)	Time to Peak (ms) - Q4 (10)	0.00137531	0.632	0.00117944	0.748	0.00127738	0.199283
Upstroke Velocity (um/s) (40)	Purification Duration - 6 days (10)	0.00131444	0.766	0.00462803	0.2	0.00297123	0.69897
Upstroke Velocity (um/s) (40)	hiPSC-CM Backbone Media - Reported (301)	0.00129077	0.161	0.00054736	0.543	0.000919066	0.793174
Upstroke Velocity (um/s) (40)	Sarcomere Length (um) Q1 <1.7 (19)	0.00128043	0.6825	0.00124813	0.752	0.00126428	0.165897
Upstroke Velocity (um/s) (40)	Electrophysiology Analysis Method - Microelectrode (29)	0.00127873	0.7745	0.00177678	0.6765	0.00152775	0.169732
Upstroke Velocity (um/s) (40)	Induction Conditions - BMP4 (74)	0.00127675	0.9685	0.00516388	0.388	0.00322031	0.411168
Upstroke Velocity (um/s) (40)	hiPSC-CM Media Supplement - GlutaMax (8)	0.00124776	0.462	0.00132879	0.5385	0.00128828	0.335358
Upstroke Velocity (um/s) (40)	3D Tissue Media - High-glucose DMEM (7)	0.00121152	0.1465	0.00198295	0.072	0.00159723	1.14267
Upstroke Velocity (um/s) (40)	2D Surface - Electrospun (13)	0.00118834	0.528	0.000422278	0.864	0.000805308	0.277366
Upstroke Velocity (um/s) (40)	AP Conduction Velocity (cm/s) - Q4 (7)	0.00118669	0.496	0.00144135	0.4925	0.00131402	0.307594
Upstroke Velocity (um/s) (40)	hiPSC-CM Backbone Media - DMEM (18)	0.00117531	0.479	0.00119812	0.578	0.00118671	0.319664
Upstroke Velocity (um/s) (40)	3D Platform - Fibrin (50)	0.00117464	0.854	6.88468e-05	0.9875	0.000621744	0.0685421
Upstroke Velocity (um/s) (40)	Disease Modelling - Arrhythmic (15)	0.00116349	0.485	0.000478632	0.8495	0.00082106	0.314258
Upstroke Velocity (um/s) (40)	2D Surface - Nanotopography (6)	0.00115442	0.166	0.000467901	0.62	0.000811159	0.779892
Upstroke Velocity (um/s) (40)	hiPSC Backbone Media - StemFit (5)	0.00113706	0.198	0.00106551	0.3315	0.00110129	0.703335
Upstroke Velocity (um/s) (40)	Time to Relaxation (ms) Quantiles (10)	0.00112469	0.531	0.0020194	0.35	0.00157205	0.455932
Upstroke Velocity (um/s) (40)	Wnt Inhibition Duration - 4 days (19)	0.00110757	0.5085	0.00220892	0.283	0.00165825	0.548214
Upstroke Velocity (um/s) (40)	2D % Confluency - 95 to 100 (13)	0.0011019	0.7025	0.00183404	0.565	0.00146797	0.247952
Upstroke Velocity (um/s) (40)	hiPSC Line - Cellapy (4)	0.00109773	0.256	0	0.7515	0.00109773	0.59176
Upstroke Velocity (um/s) (40)	Differentiation Purity % - 85 to 89 (24)	0.00107987	0.752	0.00179757	0.6175	0.00143872	0.209363
Upstroke Velocity (um/s) (40)	Metabolic Maturation Strategy (Broad) - Thyroid Hormones (14)	0.00107955	0.5895	0.0019057	0.412	0.00149263	0.385103
Upstroke Velocity (um/s) (40)	Resting Membrane Potential (mV) - Reported (44)	0.00107128	0.9675	0.00297099	0.7255	0.00202113	0.139363
Upstroke Velocity (um/s) (40)	3D Endothelial Cell Type - Reported (33)	0.00101347	0.8425	0.000876217	0.9155	0.000944844	0.0744301
Upstroke Velocity (um/s) (40)	Resting Membrane Potential (mV) - Q1 (11)	0.000998593	0.5395	0.00298761	0.1325	0.0019931	0.877784
Upstroke Velocity (um/s) (40)	hiPSC Backbone Media - Reported (228)	0.000977144	0.7635	0.00138115	0.715	0.00117914	0.145694
Upstroke Velocity (um/s) (40)	hiPSC-CM Media Supplement - L-glutamine (19)	0.000911395	0.8775	0.00138184	0.83	0.00114662	0.0809219
Upstroke Velocity (um/s) (40)	Induction Conditions - CHIR99021 (174)	0.000890424	0.992	0.00305198	0.7755	0.0019712	0.110418
Upstroke Velocity (um/s) (40)	3D Endothelial Cell Type - CMVEC (5)	0.000873727	0.5895	0.000550871	0.8	0.000712299	0.229516
Upstroke Velocity (um/s) (40)	Metabolic Maturation Strategy (Broad) - Kinase Inhibitors (3)	0.000870755	0.634	0.00201243	0.355	0.00144159	0.449772
Upstroke Velocity (um/s) (40)	Extracellular Matrix Maturation (18)	0.000837032	0.9475	0.00089059	0.9515	0.000863811	0.0234208
Upstroke Velocity (um/s) (40)	Pharmacological Interventions - Epinephrine (10)	0.000813229	0.2795	0.000549915	0.5235	0.000681572	0.553618
Upstroke Velocity (um/s) (40)	hiPSC-CM Media Supplement - Polyvinylalchohol (6)	0.000779781	0.338	0.00183669	0.094	0.00130824	1.02687
Upstroke Velocity (um/s) (40)	hiPSC-CM Media Supplement - Specialised (13)	0.000777425	0.824	0.00533988	0.0745	0.00305865	1.12784
Upstroke Velocity (um/s) (40)	3D Endothelial Cell Type - hiPSC-EC (16)	0.000766652	0.6995	0.000577701	0.8155	0.000672176	0.155212
Upstroke Velocity (um/s) (40)	3D % Confluency - 85 to 89 (12)	0.0007664	0.9255	0.000202	0.989	0.0004842	0.0336236
Upstroke Velocity (um/s) (40)	hiPSC Line - BJ RiPS (4)	0.000758488	0.3215	0.00066739	0.4895	0.000712939	0.492819
Upstroke Velocity (um/s) (40)	Disease Modelling - Genetic Disorders (23)	0.000755487	0.821	0.000510204	0.8935	0.000632845	0.0856568
Upstroke Velocity (um/s) (40)	Differentiation Purity Assessment - IHC cTnT (7)	0.000714786	0.821	0.00116065	0.765	0.000937716	0.116339
Upstroke Velocity (um/s) (40)	hiPSC-CM Media Supplement - iCell Maintenance Medium (41)	0.000709786	0.318	0.00231243	0.0425	0.00151111	1.37161
Upstroke Velocity (um/s) (40)	Number of hiPSC Lines - 3 (27)	0.00070687	0.64	0.000760195	0.7245	0.000733533	0.19382
Upstroke Velocity (um/s) (40)	Wnt Inhibition Duration - 2 days (152)	0.000704586	0.9895	0.00402685	0.5565	0.00236572	0.254535
Upstroke Velocity (um/s) (40)	Stress (mN/mm2) - Q1 (10)	0.00069382	0.846	0.0013384	0.7065	0.00101611	0.150888
Upstroke Velocity (um/s) (40)	Wnt Inhibition Duration - 5 days (6)	0.000692615	0.3875	0.00155128	0.156	0.00112194	0.806875
Upstroke Velocity (um/s) (40)	hiPSC-CM Media Supplement - VEGF (4)	0.000691148	0.3845	0.000445869	0.6355	0.000568508	0.415104
Upstroke Velocity (um/s) (40)	AP Amplitude (mV) - Q2 (10)	0.000680754	0.42	0.000712251	0.4825	0.000696502	0.376751
Upstroke Velocity (um/s) (40)	Resting Membrane Potential (mV) - Q2 (13)	0.000654561	0.729	0.000563063	0.8195	0.000608812	0.137272
Upstroke Velocity (um/s) (40)	Amplitude (F/F0) - Q2 (13)	0.000647615	0.9215	0.00175203	0.7445	0.00119982	0.128135
Upstroke Velocity (um/s) (40)	Pharmacological Interventions - E4031 (22)	0.000634624	0.429	0.00244833	0.046	0.00154148	1.33724
Upstroke Velocity (um/s) (40)	hiPSC Backbone Media - StemFlex (5)	0.00063016	0.3675	0.000717225	0.422	0.000673693	0.434743
Upstroke Velocity (um/s) (40)	Amplitude (F/F0) - Q3 (12)	0.000625808	0.667	0.00142452	0.441	0.00102516	0.355561
Upstroke Velocity (um/s) (40)	Differentiation Purity Assessment - Visual Inspection (4)	0.000625404	0.413	0.00178984	0.1565	0.00120762	0.805486
Upstroke Velocity (um/s) (40)	Purification Duration - >9 days (5)	0.000623452	0.686	0.000950708	0.6235	0.00078708	0.205164
Upstroke Velocity (um/s) (40)	Pharmacological Interventions - Carbenoxolone (4)	0.000617713	0.4125	0.00150236	0.188	0.00106004	0.725842
Upstroke Velocity (um/s) (40)	2D Surface - Hydrogel (14)	0.0006159	0.667	0.00121301	0.4715	0.000914457	0.326518
Upstroke Velocity (um/s) (40)	Wnt Inhibitor - VEGF (3)	0.000615788	0.3435	0.00139632	0.1765	0.00100606	0.753255
Upstroke Velocity (um/s) (40)	Metabolic Maturation Strategy (Broad) - Structural and Functional Protein (5)	0.000606184	0.406	0.000703829	0.5015	0.000655006	0.391474
Upstroke Velocity (um/s) (40)	hiPSC-CM Maintenance/Maturation Media (if different) - Specialised (8)	0.000604251	0.4255	0.000805328	0.45	0.000704789	0.3711
Upstroke Velocity (um/s) (40)	hiPSC Line - iCell (46)	0.000575648	0.727	0.00147846	0.4845	0.00102705	0.314706
Upstroke Velocity (um/s) (40)	3D Tissue Media - iCell Maintenance Medium (12)	0.000565645	0.4865	0.00153128	0.169	0.00104846	0.772113
Upstroke Velocity (um/s) (40)	3D CM % Composition - <75 (35)	0.000532502	0.96	0.00151005	0.811	0.00102128	0.0909791
Upstroke Velocity (um/s) (40)	Pharmacological Interventions - Metoprolol (5)	0.000522452	0.482	0.000858712	0.4435	0.000690582	0.353106
Upstroke Velocity (um/s) (40)	Conduction Velocity (cm/s) Quantiles (14)	0.000519178	0.744	0.0025063	0.239	0.00151274	0.621602
Upstroke Velocity (um/s) (40)	hiPSC Line - DF19-9-11T.H (16)	0.000514656	0.7265	0	0.909	0.000514656	0.138764
Upstroke Velocity (um/s) (40)	Disease Modelling - HCM (6)	0.000500978	0.503	0.0017037	0.1535	0.00110234	0.813892
Upstroke Velocity (um/s) (40)	hiPSC Backbone Media - DMEM (10)	0.000491978	0.769	0.00105984	0.588	0.00077591	0.230623
Upstroke Velocity (um/s) (40)	Metabolic Maturation Strategy (Broad) - Amino Acids and Derivatives (5)	0.000491083	0.532	0.00154126	0.169	0.00101617	0.772113
Upstroke Velocity (um/s) (40)	hiPSC-CM Maintenance/Maturation Media (if different) - DMEM (11)	0.000471995	0.516	0	0.7305	0.000471995	0.28735
Upstroke Velocity (um/s) (40)	Number of hiPSC Lines - 4 (10)	0.000455204	0.768	0	0.9	0.000455204	0.114639
Upstroke Velocity (um/s) (40)	Sex of hiPSC Lines - Female (42)	0.000418046	0.9455	0.00100631	0.866	0.000712176	0.0624821
Upstroke Velocity (um/s) (40)	3D Stromal Cell Type - hDF (7)	0.000410655	0.5545	0.000432148	0.6365	0.000421401	0.256098
Upstroke Velocity (um/s) (40)	hiPSC Backbone Media - Conditioned (12)	0.000410655	0.7765	0.00060241	0.7515	0.000506532	0.124071
Upstroke Velocity (um/s) (40)	2D % Confluency - EB (13)	0.000403138	0.7955	0.00151923	0.471	0.000961184	0.326979
Upstroke Velocity (um/s) (40)	Conduction Velocity (cm/s) - Reported (14)	0.00036316	0.8415	0.000536306	0.819	0.000449733	0.0867161
Upstroke Velocity (um/s) (40)	3D % Confluency - 90 to 94 (11)	0.000359217	0.904	0.000368324	0.932	0.00036377	0.0438316
Upstroke Velocity (um/s) (40)	Metabolic Maturation Strategy - Galactose (3)	0.000358349	0.615	0.000569801	0.599	0.000464075	0.222573
Upstroke Velocity (um/s) (40)	Wnt Inhibition Duration - >6 days (12)	0.000356141	0.5535	0.00127411	0.2055	0.000815127	0.687188
Upstroke Velocity (um/s) (40)	Pharmacological Interventions - Caffeine (4)	0.000354893	0.6155	0.00173912	0.154	0.00104701	0.812479
Upstroke Velocity (um/s) (40)	3D % Confluency - EB (31)	0.000348619	0.8035	0.000449691	0.831	0.000399155	0.0950141
Upstroke Velocity (um/s) (40)	Electrophysiology Analysis Method - Motion-Contrast Reconstruction (4)	0.000327414	0.5845	0.000344234	0.667	0.000335824	0.233215
Upstroke Velocity (um/s) (40)	hiPSC-CM Backbone Media - IMDM/E8/BPEL/APEL (8)	0.000263648	0.647	0	0.7475	0.000263648	0.189096
Upstroke Velocity (um/s) (40)	Time to Relaxation (ms) - Reported (10)	0.000260785	0.898	0.000505902	0.8465	0.000383344	0.072373
Upstroke Velocity (um/s) (40)	2D % Confluency - 90 to 94 (10)	0.000259589	0.928	0.000475371	0.929	0.00036748	0.032452
Upstroke Velocity (um/s) (40)	AP Conduction Velocity (cm/s) - Q3 (6)	0.000256842	0.647	0	0.7305	0.000256842	0.189096
Upstroke Velocity (um/s) (40)	Time to Relaxation (ms) - Q1 (5)	0.000254373	0.8985	0.00267719	0.244	0.00146578	0.61261
Upstroke Velocity (um/s) (40)	Number of hiPSC Lines - >5 (8)	0.000160698	0.6285	0	0.7025	0.000160698	0.201695
Upstroke Velocity (um/s) (40)	Metabolic Maturation Strategy (Broad) - Hormonal Stimulation (15)	9.42985e-05	0.892	0.00163048	0.425	0.000862388	0.371611
Upstroke Velocity (um/s) (40)	2D Surface - Microparticle/fluid (3)	0	0.6525	3.50263e-05	0.7155	3.50263e-05	0.185419
Upstroke Velocity (um/s) (40)	Purification Duration - <3 days (17)	0	0.626	6.13874e-05	0.684	6.13874e-05	0.203426
Upstroke Velocity (um/s) (40)	Metabolic Maturation Strategy (Broad) - Sugar and Carbohydrates (7)	0	0.665	0.000361733	0.68	0.000361733	0.177178
Upstroke Velocity (um/s) (40)	Conduction Velocity (cm/s) - Q1 (7)	0	0.6955	0.000409056	0.6665	0.000409056	0.1762
Upstroke Velocity (um/s) (40)	3D % Confluency - 70 to 79 (4)	0	0.6815	0.000440678	0.658	0.000440678	0.181774
Upstroke Velocity (um/s) (40)	hiPSC-CM Media Supplement - Essential Lipids (6)	0	0.672	0.00044905	0.6535	0.00044905	0.184754
Upstroke Velocity (um/s) (40)	hiPSC-CM Media Supplement - Mercaptoethanol (10)	0	0.668	0.000538864	0.57	0.000538864	0.244125
Upstroke Velocity (um/s) (40)	3D Platform - Collagen (37)	0	0.88	0.000548885	0.814	0.000548885	0.0893756
Upstroke Velocity (um/s) (40)	hiPSC-CM Media Supplement - FBS (16)	0	0.659	0.000551244	0.5465	0.000551244	0.26241
Upstroke Velocity (um/s) (40)	Differentiation Purity Assessment - IHC a-actinin (8)	0	0.88	0.000564972	0.8055	0.000564972	0.0939345
Upstroke Velocity (um/s) (40)	Induction Duration - 3 days (37)	0	0.975	0.000670017	0.9255	0.000670017	0.0336236
Upstroke Velocity (um/s) (40)	Differentiation Purity % - 70 to 74 (10)	0	0.6715	0.000686859	0.503	0.000686859	0.298432
Upstroke Velocity (um/s) (40)	3D Stromal Cell Type - SMC (3)	0	0.6735	0.00070502	0.467	0.00070502	0.330683
Upstroke Velocity (um/s) (40)	hiPSC Line - PGP1 (11)	0	0.659	0.000707638	0.4465	0.000707638	0.350179
Upstroke Velocity (um/s) (40)	3D Estimated Tissue Cell Density (10^6 cells/mL) Q1 <2.82 (40)	0	0.8865	0.000713417	0.7315	0.000713417	0.135786
Upstroke Velocity (um/s) (40)	AP Amplitude (mV) - Q1 (11)	0	0.676	0.000829953	0.424	0.000829953	0.372634
Upstroke Velocity (um/s) (40)	Metabolic Maturation Strategy (Broad) - Fatty Acid and Lipids (19)	0	0.8825	0.000873226	0.698	0.000873226	0.156145
Upstroke Velocity (um/s) (40)	3D Stromal Cell Type - hMSC (12)	0	0.955	0.00108286	0.7825	0.00108286	0.106516
Upstroke Velocity (um/s) (40)	Differentiation Purity % - 75 to 79 (8)	0	0.6845	0.00108923	0.335	0.00108923	0.474955
Upstroke Velocity (um/s) (40)	Differentiation Purity Assessment - Specialised (10)	0	0.701	0.00110584	0.3205	0.00110584	0.494172
Upstroke Velocity (um/s) (40)	Metabolic Maturation Strategy - Specialised (9)	0	0.9805	0.00116351	0.867	0.00116351	0.0619809
Upstroke Velocity (um/s) (40)	Wnt Inhibitor - Wnt-C59 (28)	0	0.9865	0.00125148	0.8665	0.00125148	0.0622314
Upstroke Velocity (um/s) (40)	Contractile Analysis Method - Force Transducer (26)	0	0.9565	0.00127582	0.7325	0.00127582	0.135192
Upstroke Velocity (um/s) (40)	hiPSC-CM Backbone Media - StemPro-34 (14)	0	0.9785	0.00131678	0.7985	0.00131678	0.0977251
Upstroke Velocity (um/s) (40)	2D % Confluency - 70 to 79 (5)	0	0.6765	0.00205335	0.0895	0.00205335	1.04818
Upstroke Velocity (um/s) (40)	Force (mN) - Q2 (12)	0	0.9415	0.00217037	0.432	0.00217037	0.364516
Amplitude (F/F0) (50)	Sarcomere Length (um) - Mature Q2 1.7 to 1.9 (28)	0.0173664	0.0075	0.0145245	0.009	0.0159455	2.12494
Amplitude (F/F0) (50)	Force (mN) - Reported (48)	0.0136035	0.0225	0.00893983	0.0855	0.0112717	1.64782
Amplitude (F/F0) (50)	Beat Rate (beats per minute) Quantiles (54)	0.0134339	0.259	0.0122745	0.2765	0.0128542	0.5867
Amplitude (F/F0) (50)	Number of hiPSC Lines - 1 (218)	0.0133473	0.06	0.0086955	0.157	0.0110214	1.22185
Amplitude (F/F0) (50)	Resting Membrane Potential (mV) Quantiles (44)	0.0128015	0.0935	0.00600344	0.6485	0.00940245	1.02919
Amplitude (F/F0) (50)	Time to Peak (ms) Quantiles (41)	0.0121447	0.528	0.00861192	0.785	0.0103783	0.277366
Amplitude (F/F0) (50)	hiPSC-CM Matrix Coating if Replated - Reported (152)	0.0115827	0.1155	0.00730641	0.271	0.00944454	0.937418
Amplitude (F/F0) (50)	2D Surface - ECM-coated (114)	0.0111794	0.098	0.0101203	0.0925	0.0106499	1.03386
Amplitude (F/F0) (50)	Sarcomere Length (um) Quantiles (64)	0.0111325	0.369	0.00751892	0.691	0.00932573	0.432974
Amplitude (F/F0) (50)	Tension Maturation (64)	0.0105761	0.0385	0.00731937	0.1235	0.00894775	1.41454
Amplitude (F/F0) (50)	3D Platform - Scaffold Free (43)	0.00994837	0.04	0.0108594	0.02	0.0104039	1.69897
Amplitude (F/F0) (50)	Differentiation Purity Assessment - Flow Cytometry cTnT+ (134)	0.00967561	0.179	0.0111105	0.083	0.0103931	1.08092
Amplitude (F/F0) (50)	Gene Analysis Method - Reported (167)	0.00959154	0.1995	0.00740375	0.296	0.00849764	0.700057
Amplitude (F/F0) (50)	Wnt Inhibition Duration - 2 days (152)	0.00948322	0.192	0.00627987	0.3805	0.00788155	0.716699
Amplitude (F/F0) (50)	Wnt Inhibitor - IWR (54)	0.00907935	0.1565	0.00503361	0.469	0.00705648	0.805486
Amplitude (F/F0) (50)	Cell Alignment Maturation (55)	0.00903693	0.036	0.0112354	0.015	0.0101362	1.82391
Amplitude (F/F0) (50)	Resting Membrane Potential (mV) - Reported (44)	0.00850936	0.1195	0.00361351	0.6215	0.00606143	0.922632
Amplitude (F/F0) (50)	Stress (mN/mm2) Quantiles (37)	0.00837795	0.089	0.00829513	0.116	0.00833654	1.05061
Amplitude (F/F0) (50)	Wnt Inhibitor - XAV939 (23)	0.00828179	0.0045	0.00598466	0.035	0.00713323	2.34679
Amplitude (F/F0) (50)	Ancestry of hiPSC Lines - Asian (30)	0.00798744	0.136	0.00648532	0.2065	0.00723638	0.866461
Amplitude (F/F0) (50)	Disease Modelling - Reported (50)	0.00770217	0.0625	0.00593175	0.141	0.00681696	1.20412
Amplitude (F/F0) (50)	Induction Conditions - BMP4 (74)	0.00757074	0.1725	0.00722397	0.157	0.00739735	0.8041
Amplitude (F/F0) (50)	Metabolic Analysis Method - Reported (45)	0.00754137	0.2305	0.0100936	0.0755	0.00881746	1.12205
Amplitude (F/F0) (50)	Pharmacological Interventions - Reported (141)	0.00749306	0.2795	0.00690277	0.2565	0.00719792	0.590913
Amplitude (F/F0) (50)	Force (mN) Quantiles (48)	0.00740687	0.31	0.0126385	0.0425	0.0100227	1.37161
Amplitude (F/F0) (50)	hiPSC-CM Media Supplement - B27 (174)	0.00738497	0.2485	0.00427512	0.62	0.00583005	0.604674
Amplitude (F/F0) (50)	Purification Stategy - Reported (101)	0.00721727	0.3875	0.00880425	0.187	0.00801076	0.728158
Amplitude (F/F0) (50)	Pharmacological Interventions - Isoproterenol (70)	0.00716381	0.1455	0.00719685	0.1285	0.00718033	0.891097
Amplitude (F/F0) (50)	Electrophysiology Analysis Method - Reported (117)	0.00704395	0.383	0.00603755	0.4	0.00654075	0.416801
Amplitude (F/F0) (50)	Scanning Electron Microscopy (21)	0.0070284	0.006	0.00781885	0.0075	0.00742363	2.22185
Amplitude (F/F0) (50)	Beat Rate (beats per minute) - Reported (54)	0.00698594	0.2885	0.00382379	0.663	0.00540487	0.539854
Amplitude (F/F0) (50)	Sex of hiPSC Lines - Known (116)	0.00692101	0.4	0.0065805	0.3465	0.00675076	0.460297
Amplitude (F/F0) (50)	3D Tissue Media - Reported (157)	0.00673008	0.4165	0.00603193	0.4215	0.006381	0.380385
Amplitude (F/F0) (50)	3D CM % Composition - <75 (35)	0.00669476	0.133	0.00416041	0.375	0.00542759	0.876148
Amplitude (F/F0) (50)	Metabolic Analysis Method - Seahorse (35)	0.0066901	0.3065	0.00545101	0.4075	0.00607055	0.51357
Amplitude (F/F0) (50)	Metabolic Maturation Strategy (Broad) - Metabolic Modulation (19)	0.00667991	0.119	0.00250429	0.7165	0.0045921	0.924453
Amplitude (F/F0) (50)	hiPSC-CM Backbone Media - RPMI-1640 (161)	0.00666604	0.3465	0.0035968	0.7505	0.00513142	0.460297
Amplitude (F/F0) (50)	3D Estimated Tissue Size (mm2) Quantiles (133)	0.00659928	0.838	0.00433975	0.967	0.00546952	0.076756
Amplitude (F/F0) (50)	Time to Peak (ms) - Reported (41)	0.00643416	0.449	0.00570293	0.4385	0.00606854	0.35803
Amplitude (F/F0) (50)	3D % Confluency - 85 to 89 (12)	0.00642992	0.1	0.00562876	0.143	0.00602934	1
Amplitude (F/F0) (50)	2D Surface - Micropatterned (24)	0.00642565	0.0725	0.0025128	0.59	0.00446922	1.13966
Amplitude (F/F0) (50)	hiPSC Line - Specialised (121)	0.00636891	0.399	0.00795531	0.192	0.00716211	0.716699
Amplitude (F/F0) (50)	Insulin Addition - prior Day 8 (149)	0.00625169	0.5145	0.00365187	0.8275	0.00495178	0.288615
Amplitude (F/F0) (50)	Number of hiPSC Lines - 2 (50)	0.00623523	0.2215	0.00564849	0.2525	0.00594186	0.654626
Amplitude (F/F0) (50)	3D Stromal Cell Type - Reported (77)	0.0061825	0.455	0.00574232	0.4025	0.00596241	0.395234
Amplitude (F/F0) (50)	Contractile Analysis Method - Reported(163)	0.00616053	0.4395	0.00419439	0.658	0.00517746	0.357041
Amplitude (F/F0) (50)	Electrophysiology Analysis Method - Optical Mapping (39)	0.00615815	0.217	0.00709912	0.1285	0.00662864	0.891097
Amplitude (F/F0) (50)	Sarcomere/Cellular Alignment Analysis (67)	0.006113	0.4315	0.00425151	0.6445	0.00518225	0.365019
Amplitude (F/F0) (50)	hiPSC-CM Matrix Coating if Replated - Matrigel (64)	0.00609801	0.3925	0.00374908	0.6815	0.00492355	0.40616
Amplitude (F/F0) (50)	2D % Confluency - Reported (236)	0.00608542	0.378	0.00322856	0.7825	0.00465699	0.422508
Amplitude (F/F0) (50)	AP Amplitude (mV) Quantiles (40)	0.00604292	0.532	0.00677761	0.436	0.00641026	0.360514
Amplitude (F/F0) (50)	2D % Confluency - 85 to 89 (31)	0.0060048	0.161	0.00638938	0.1355	0.00619709	0.868061
Amplitude (F/F0) (50)	Gene Analysis Method - Specialised (6)	0.00566665	0.0005	0.00642397	0.0015	0.00604531	3.30103
Amplitude (F/F0) (50)	Metabolic Maturation Strategy (Broad) - Glucocorticoids (7)	0.0056644	0.033	0.0023025	0.43	0.00398345	1.48149
Amplitude (F/F0) (50)	Time to Peak (ms) - Q4 (10)	0.00561577	0.277	0.00492372	0.351	0.00526974	0.55752
Amplitude (F/F0) (50)	3D Estimated Tissue Cell Density (10^6 cells/mL) Quantiles (120)	0.00560418	0.94	0.00612987	0.893	0.00586702	0.0491485
Amplitude (F/F0) (50)	Other Cells Maturation (77)	0.00554905	0.542	0.00735356	0.239	0.0064513	0.621602
Amplitude (F/F0) (50)	Transmission Electron Microscopy (62)	0.00550839	0.451	0.00420164	0.5855	0.00485502	0.345823
Amplitude (F/F0) (50)	Insulin Addition - after Day 7 (26)	0.00547595	0.3	0.00480884	0.3625	0.00514239	0.522879
Amplitude (F/F0) (50)	Stress (mN/mm2) - Reported (37)	0.00546574	0.169	0.00909852	0.031	0.00728213	1.50864
Amplitude (F/F0) (50)	Beat Rate (beats per minute) - Q3 (10)	0.00541974	0.0875	0.00424842	0.2215	0.00483408	1.05799
Amplitude (F/F0) (50)	hiPSC-CM Maintenance/Maturation Media (if different) - Reported (51)	0.0054113	0.3305	0.00336775	0.6705	0.00438952	0.480829
Amplitude (F/F0) (50)	Differentiation Purity % - Reported (153)	0.00541066	0.5055	0.00494556	0.4875	0.00517811	0.312025
Amplitude (F/F0) (50)	Upstroke Velocity (um/s) Quantiles (40)	0.00539149	0.686	0.00576473	0.629	0.00557811	0.201349
Amplitude (F/F0) (50)	3D CM % Composition - >74 (115)	0.00535946	0.525	0.00474096	0.5535	0.00505021	0.279841
[truncated: 2,225 more rows]

## Sheet: 3_NotEnrichedProto_26Aug24
Prioritised Features	Target Label
2D % Confluency - 70 to 79 (5)	3D Estimated Tissue Cell Density (10^6 cells/mL) (120)
2D % Confluency - 80 to 84 (4)	3D Estimated Tissue Cell Density (10^6 cells/mL) (120)
2D % Confluency - 90 to 94 (10)	3D Estimated Tissue Cell Density (10^6 cells/mL) (120)
2D % Confluency - EB (13)	3D Estimated Tissue Cell Density (10^6 cells/mL) (120)
2D Surface - Electrospun (13)	3D Estimated Tissue Cell Density (10^6 cells/mL) (120)
2D Surface - Microelectrode Array (9)	3D Estimated Tissue Cell Density (10^6 cells/mL) (120)
2D Surface - Microparticle/fluid (3)	3D Estimated Tissue Cell Density (10^6 cells/mL) (120)
2D Surface - Nanotopography (6)	3D Estimated Tissue Cell Density (10^6 cells/mL) (120)
3D % Confluency - 70 to 79 (4)	3D Estimated Tissue Cell Density (10^6 cells/mL) (120)
3D % Confluency - 80 to 84 (6)	3D Estimated Tissue Cell Density (10^6 cells/mL) (120)
3D % Confluency - EB (31)	3D Estimated Tissue Cell Density (10^6 cells/mL) (120)
3D Estimated Tissue Cell Density (10^6 cells/mL) Q1 <2.82 (40)	3D Estimated Tissue Cell Density (10^6 cells/mL) (120)
3D Estimated Tissue Cell Density (10^6 cells/mL) Q2 2.82 to 10.8 (40)	3D Estimated Tissue Cell Density (10^6 cells/mL) (120)
3D Estimated Tissue Cell Density (10^6 cells/mL) Q3 >10.8 (40)	3D Estimated Tissue Cell Density (10^6 cells/mL) (120)
3D Estimated Tissue Cell Density (10^6 cells/mL) Quantiles (120)	3D Estimated Tissue Cell Density (10^6 cells/mL) (120)
3D Tissue Media - Cor.4U (3)	3D Estimated Tissue Cell Density (10^6 cells/mL) (120)
Calcium Handling Analysis Method - Specialised (3)	3D Estimated Tissue Cell Density (10^6 cells/mL) (120)
Contractile Analysis Method - Specialised (6)	3D Estimated Tissue Cell Density (10^6 cells/mL) (120)
Differentiation Purity Assessment - Flow Cytometry SIRPA+ (4)	3D Estimated Tissue Cell Density (10^6 cells/mL) (120)
Induction Conditions - StemCell Differentiation Kit (4)	3D Estimated Tissue Cell Density (10^6 cells/mL) (120)
Metabolic Analysis Method - Mitochondrial (4)	3D Estimated Tissue Cell Density (10^6 cells/mL) (120)
Metabolic Maturation Strategy (Broad) - Insulin and Related Components (3)	3D Estimated Tissue Cell Density (10^6 cells/mL) (120)
Metabolic Maturation Strategy (Broad) - Kinase Inhibitors (3)	3D Estimated Tissue Cell Density (10^6 cells/mL) (120)
Metabolic Maturation Strategy (Broad) - Nutrition and Supplements (6)	3D Estimated Tissue Cell Density (10^6 cells/mL) (120)
Metabolic Maturation Strategy (Broad) - Serum and Serum Replacements (3)	3D Estimated Tissue Cell Density (10^6 cells/mL) (120)
Metabolic Maturation Strategy (Broad) - Structural and Functional Protein (5)	3D Estimated Tissue Cell Density (10^6 cells/mL) (120)
Metabolic Maturation Strategy (Broad) - Sugar and Carbohydrates (7)	3D Estimated Tissue Cell Density (10^6 cells/mL) (120)
Metabolic Maturation Strategy (Broad) - Vitamins and Minerals (3)	3D Estimated Tissue Cell Density (10^6 cells/mL) (120)
Metabolic Maturation Strategy - Albumax (3)	3D Estimated Tissue Cell Density (10^6 cells/mL) (120)
Metabolic Maturation Strategy - Biotin (3)	3D Estimated Tissue Cell Density (10^6 cells/mL) (120)
Metabolic Maturation Strategy - Galactose (3)	3D Estimated Tissue Cell Density (10^6 cells/mL) (120)
Metabolic Maturation Strategy - Insulin-Transferrin-Selenium (3)	3D Estimated Tissue Cell Density (10^6 cells/mL) (120)
Metabolic Maturation Strategy - Lactate (4)	3D Estimated Tissue Cell Density (10^6 cells/mL) (120)
Metabolic Maturation Strategy - Nonessential Amino Acids (3)	3D Estimated Tissue Cell Density (10^6 cells/mL) (120)
Pharmacological Interventions - Caffeine (4)	3D Estimated Tissue Cell Density (10^6 cells/mL) (120)
Pharmacological Interventions - T3 (3)	3D Estimated Tissue Cell Density (10^6 cells/mL) (120)
Pharmacological Interventions - Thalidomide (3)	3D Estimated Tissue Cell Density (10^6 cells/mL) (120)
Purification Stategy - Antibiotic (3)	3D Estimated Tissue Cell Density (10^6 cells/mL) (120)
Resting Membrane Potential (mV) - Q2 (13)	3D Estimated Tissue Cell Density (10^6 cells/mL) (120)
Wnt Inhibition Duration - 5 days (6)	3D Estimated Tissue Cell Density (10^6 cells/mL) (120)
hiPSC Backbone Media - Differentiation (1)	3D Estimated Tissue Cell Density (10^6 cells/mL) (120)
hiPSC Line - 201B7 (9)	3D Estimated Tissue Cell Density (10^6 cells/mL) (120)
hiPSC Line - BJ RiPS (4)	3D Estimated Tissue Cell Density (10^6 cells/mL) (120)
hiPSC Line - Cellapy (4)	3D Estimated Tissue Cell Density (10^6 cells/mL) (120)
hiPSC-CM Backbone Media - Cor.4U Complete Medium (6)	3D Estimated Tissue Cell Density (10^6 cells/mL) (120)
hiPSC-CM Matrix Coating if Replated - Laminin (5)	3D Estimated Tissue Cell Density (10^6 cells/mL) (120)
hiPSC-CM Matrix Coating if Replated - Synthemax (3)	3D Estimated Tissue Cell Density (10^6 cells/mL) (120)
2D % Confluency - 70 to 79 (5)	3D Estimated Tissue Size (mm2) (133)
2D % Confluency - 80 to 84 (4)	3D Estimated Tissue Size (mm2) (133)
2D % Confluency - 90 to 94 (10)	3D Estimated Tissue Size (mm2) (133)
2D % Confluency - EB (13)	3D Estimated Tissue Size (mm2) (133)
2D Surface - Decellularized ECM (3)	3D Estimated Tissue Size (mm2) (133)
2D Surface - Electrospun (13)	3D Estimated Tissue Size (mm2) (133)
2D Surface - Microelectrode Array (9)	3D Estimated Tissue Size (mm2) (133)
2D Surface - Nanotopography (6)	3D Estimated Tissue Size (mm2) (133)
3D % Confluency - 70 to 79 (4)	3D Estimated Tissue Size (mm2) (133)
3D % Confluency - 80 to 84 (6)	3D Estimated Tissue Size (mm2) (133)
3D % Confluency - EB (31)	3D Estimated Tissue Size (mm2) (133)
3D Estimated Tissue Size (mm2) Q1 <0.28 (34)	3D Estimated Tissue Size (mm2) (133)
3D Estimated Tissue Size (mm2) Q2 0.28 to 4 (34)	3D Estimated Tissue Size (mm2) (133)
3D Estimated Tissue Size (mm2) Q3 4 to 20 (33)	3D Estimated Tissue Size (mm2) (133)
3D Estimated Tissue Size (mm2) Q3 >20 (32)	3D Estimated Tissue Size (mm2) (133)
3D Estimated Tissue Size (mm2) Quantiles (133)	3D Estimated Tissue Size (mm2) (133)
3D Stromal Cell Type - hiPSC-MC (3)	3D Estimated Tissue Size (mm2) (133)
Calcium Handling Analysis Method - Specialised (3)	3D Estimated Tissue Size (mm2) (133)
Differentiation Purity Assessment - Flow Cytometry cTnI+ (3)	3D Estimated Tissue Size (mm2) (133)
Differentiation Purity Assessment - Visual Inspection (4)	3D Estimated Tissue Size (mm2) (133)
Disease Modelling - Metabolic Disorders (4)	3D Estimated Tissue Size (mm2) (133)
Induction Conditions - StemCell Differentiation Kit (4)	3D Estimated Tissue Size (mm2) (133)
Induction Conditions - Wnt3a (3)	3D Estimated Tissue Size (mm2) (133)
Induction Duration - 5 days (8)	3D Estimated Tissue Size (mm2) (133)
Metabolic Analysis Method - Mitochondrial (4)	3D Estimated Tissue Size (mm2) (133)
Metabolic Maturation Strategy (Broad) - Amino Acids and Derivatives (5)	3D Estimated Tissue Size (mm2) (133)
Metabolic Maturation Strategy (Broad) - Insulin and Related Components (3)	3D Estimated Tissue Size (mm2) (133)
Metabolic Maturation Strategy (Broad) - Kinase Inhibitors (3)	3D Estimated Tissue Size (mm2) (133)
Metabolic Maturation Strategy (Broad) - Serum and Serum Replacements (3)	3D Estimated Tissue Size (mm2) (133)
Metabolic Maturation Strategy (Broad) - Signaling Pathway Regulators (6)	3D Estimated Tissue Size (mm2) (133)
Metabolic Maturation Strategy (Broad) - Specialised (4)	3D Estimated Tissue Size (mm2) (133)
Metabolic Maturation Strategy (Broad) - Sugar and Carbohydrates (7)	3D Estimated Tissue Size (mm2) (133)
Metabolic Maturation Strategy (Broad) - Vitamins and Minerals (3)	3D Estimated Tissue Size (mm2) (133)
Metabolic Maturation Strategy - Albumax (3)	3D Estimated Tissue Size (mm2) (133)
Metabolic Maturation Strategy - Ascorbic Acid (3)	3D Estimated Tissue Size (mm2) (133)
Metabolic Maturation Strategy - Biotin (3)	3D Estimated Tissue Size (mm2) (133)
Metabolic Maturation Strategy - Galactose (3)	3D Estimated Tissue Size (mm2) (133)
Metabolic Maturation Strategy - Insulin-Transferrin-Selenium (3)	3D Estimated Tissue Size (mm2) (133)
Metabolic Maturation Strategy - KOSR (3)	3D Estimated Tissue Size (mm2) (133)
Metabolic Maturation Strategy - Lactate (4)	3D Estimated Tissue Size (mm2) (133)
Metabolic Maturation Strategy - Nonessential Amino Acids (3)	3D Estimated Tissue Size (mm2) (133)
Metabolic Maturation Strategy - Vitamin B12 (3)	3D Estimated Tissue Size (mm2) (133)
Number of hiPSC Lines - Reported (313)	3D Estimated Tissue Size (mm2) (133)
Pharmacological Interventions - Caffeine (4)	3D Estimated Tissue Size (mm2) (133)
Pharmacological Interventions - Phenylephrine (3)	3D Estimated Tissue Size (mm2) (133)
Pharmacological Interventions - T3 (3)	3D Estimated Tissue Size (mm2) (133)
Pharmacological Interventions - Thalidomide (3)	3D Estimated Tissue Size (mm2) (133)
Purification Duration - 7 days (6)	3D Estimated Tissue Size (mm2) (133)
Time to Relaxation (ms) - Q2 (5)	3D Estimated Tissue Size (mm2) (133)
hiPSC Backbone Media - Differentiation (1)	3D Estimated Tissue Size (mm2) (133)
hiPSC Backbone Media - StemFlex (5)	3D Estimated Tissue Size (mm2) (133)
hiPSC Line - 201B6 (3)	3D Estimated Tissue Size (mm2) (133)
hiPSC Line - 253G1 (10)	3D Estimated Tissue Size (mm2) (133)
hiPSC Line - ATCC (5)	3D Estimated Tissue Size (mm2) (133)
hiPSC Line - BJ RiPS (4)	3D Estimated Tissue Size (mm2) (133)
hiPSC Line - Cellapy (4)	3D Estimated Tissue Size (mm2) (133)
hiPSC-CM Maintenance/Maturation Media (if different) - Modified Essential Medium (1)	3D Estimated Tissue Size (mm2) (133)
hiPSC-CM Matrix Coating if Replated - Specialised (8)	3D Estimated Tissue Size (mm2) (133)
hiPSC-CM Media Supplement - L-glutamine (19)	3D Estimated Tissue Size (mm2) (133)
hiPSC-CM Media Supplement - Nonessential Amino Acids (7)	3D Estimated Tissue Size (mm2) (133)
2D % Confluency - 90 to 94 (10)	AP Amplitude (mV) (40)
2D Surface - Decellularized ECM (3)	AP Amplitude (mV) (40)
2D Surface - Hydrogel (14)	AP Amplitude (mV) (40)
2D Surface - Microparticle/fluid (3)	AP Amplitude (mV) (40)
3D % Confluency - 80 to 84 (6)	AP Amplitude (mV) (40)
3D % Confluency - 90 to 94 (11)	AP Amplitude (mV) (40)
3D Endothelial Cell Type - CMVEC (5)	AP Amplitude (mV) (40)
3D Endothelial Cell Type - HUVEC (9)	AP Amplitude (mV) (40)
3D Endothelial Cell Type - Specialised (3)	AP Amplitude (mV) (40)
3D Platform - 3D printed (9)	AP Amplitude (mV) (40)
3D Platform - Fibronectin (3)	AP Amplitude (mV) (40)
3D Platform - Gelatin (6)	AP Amplitude (mV) (40)
3D Platform - Nanotechnology (3)	AP Amplitude (mV) (40)
3D Platform - Polyethylene Glycol (8)	AP Amplitude (mV) (40)
3D Stromal Cell Type - SMC (3)	AP Amplitude (mV) (40)
3D Stromal Cell Type - hFF (6)	AP Amplitude (mV) (40)
3D Stromal Cell Type - hMSC (12)	AP Amplitude (mV) (40)
3D Stromal Cell Type - hiPSC-MC (3)	AP Amplitude (mV) (40)
3D Tissue Media - Cor.4U (3)	AP Amplitude (mV) (40)
3D Tissue Media - EGM2 (6)	AP Amplitude (mV) (40)
3D Tissue Media - High-glucose DMEM (7)	AP Amplitude (mV) (40)
3D Tissue Media - Specialised (4)	AP Amplitude (mV) (40)
3D Tissue Media - StemPro-34 (4)	AP Amplitude (mV) (40)
3D Tissue Media - iCell Maintenance Medium (12)	AP Amplitude (mV) (40)
AP Amplitude (mV) - Q1 (11)	AP Amplitude (mV) (40)
AP Amplitude (mV) - Q2 (10)	AP Amplitude (mV) (40)
AP Amplitude (mV) - Q3 (9)	AP Amplitude (mV) (40)
AP Amplitude (mV) - Q4 (10)	AP Amplitude (mV) (40)
AP Amplitude (mV) - Reported(40)	AP Amplitude (mV) (40)
AP Amplitude (mV) Quantiles (40)	AP Amplitude (mV) (40)
AP Conduction Velocity (cm/s) - Q3 (6)	AP Amplitude (mV) (40)
Beat Rate (beats per minute) - Q1 (15)	AP Amplitude (mV) (40)
Beat Rate (beats per minute) - Q3 (10)	AP Amplitude (mV) (40)
Calcium Handling Analysis Method - Specialised (3)	AP Amplitude (mV) (40)
Contractile Analysis Method - Force Transducer (26)	AP Amplitude (mV) (40)
Contractile Analysis Method - Specialised (6)	AP Amplitude (mV) (40)
Differentiation Purity % - 60 to 69 (5)	AP Amplitude (mV) (40)
Differentiation Purity Assessment - Flow Cytometry cTnI+ (3)	AP Amplitude (mV) (40)
Differentiation Purity Assessment - IHC a-actinin (8)	AP Amplitude (mV) (40)
Differentiation Purity Assessment - IHC cTnT (7)	AP Amplitude (mV) (40)
Differentiation Purity Assessment - Specialised (10)	AP Amplitude (mV) (40)
Differentiation Purity Assessment - Visual Inspection (4)	AP Amplitude (mV) (40)
Disease Modelling - Acute Myocardial Infarction (4)	AP Amplitude (mV) (40)
Disease Modelling - DCM (5)	AP Amplitude (mV) (40)
Disease Modelling - Ischemic/Infarction (7)	AP Amplitude (mV) (40)
Disease Modelling - Metabolic Disorders (4)	AP Amplitude (mV) (40)
Disease Modelling - Specialised (3)	AP Amplitude (mV) (40)
Electrophysiology Analysis Method - Genetical (3)	AP Amplitude (mV) (40)
Electrophysiology Analysis Method - Motion-Contrast Reconstruction (4)	AP Amplitude (mV) (40)
Extracellular Matrix Maturation (18)	AP Amplitude (mV) (40)
Gene Analysis Method - Specialised (6)	AP Amplitude (mV) (40)
Induction Conditions - Specialised (5)	AP Amplitude (mV) (40)
Induction Conditions - StemCell Differentiation Kit (4)	AP Amplitude (mV) (40)
Induction Conditions - Wnt3a (3)	AP Amplitude (mV) (40)
Induction Duration - 4 days (15)	AP Amplitude (mV) (40)
Max Capture Rate (Hz) - Q1 (8)	AP Amplitude (mV) (40)
Mechanical Maturation (34)	AP Amplitude (mV) (40)
Metabolic Analysis Method - Mitochondrial (4)	AP Amplitude (mV) (40)
Metabolic Maturation Strategy (Broad) - Insulin and Related Components (3)	AP Amplitude (mV) (40)
Metabolic Maturation Strategy (Broad) - Structural and Functional Protein (5)	AP Amplitude (mV) (40)
Metabolic Maturation Strategy (Broad) - Sugar and Carbohydrates (7)	AP Amplitude (mV) (40)
Metabolic Maturation Strategy (Broad) - Vitamins and Minerals (3)	AP Amplitude (mV) (40)
Metabolic Maturation Strategy - Ascorbic Acid (3)	AP Amplitude (mV) (40)
Metabolic Maturation Strategy - B27 (3)	AP Amplitude (mV) (40)
Metabolic Maturation Strategy - Biotin (3)	AP Amplitude (mV) (40)
Metabolic Maturation Strategy - Galactose (3)	AP Amplitude (mV) (40)
Metabolic Maturation Strategy - IGF-1 (3)	AP Amplitude (mV) (40)
Metabolic Maturation Strategy - Insulin-Transferrin-Selenium (3)	AP Amplitude (mV) (40)
Metabolic Maturation Strategy - KOSR (3)	AP Amplitude (mV) (40)
Metabolic Maturation Strategy - L-carnitine (6)	AP Amplitude (mV) (40)
Metabolic Maturation Strategy - Lactate (4)	AP Amplitude (mV) (40)
Metabolic Maturation Strategy - Vitamin B12 (3)	AP Amplitude (mV) (40)
Number of hiPSC Lines - Reported (313)	AP Amplitude (mV) (40)
Pharmacological Interventions - Blebbistatin (5)	AP Amplitude (mV) (40)
Pharmacological Interventions - Carbamylcholine (6)	AP Amplitude (mV) (40)
Pharmacological Interventions - Carbenoxolone (4)	AP Amplitude (mV) (40)
Pharmacological Interventions - Cisapride (5)	AP Amplitude (mV) (40)
Pharmacological Interventions - Epinephrine (10)	AP Amplitude (mV) (40)
Pharmacological Interventions - Metoprolol (5)	AP Amplitude (mV) (40)
Pharmacological Interventions - Phenylephrine (3)	AP Amplitude (mV) (40)
Pharmacological Interventions - Propranolol (5)	AP Amplitude (mV) (40)
Pharmacological Interventions - Ranolazine (6)	AP Amplitude (mV) (40)
Pharmacological Interventions - T3 (3)	AP Amplitude (mV) (40)
Pharmacological Interventions - Thalidomide (3)	AP Amplitude (mV) (40)
Purification Duration - 5 days (6)	AP Amplitude (mV) (40)
Purification Duration - 7 days (6)	AP Amplitude (mV) (40)
Purification Duration - >9 days (5)	AP Amplitude (mV) (40)
Purification Stategy - Antibiotic (3)	AP Amplitude (mV) (40)
Stress (mN/mm2) - Q1 (10)	AP Amplitude (mV) (40)
Stress (mN/mm2) - Q2 (9)	AP Amplitude (mV) (40)
Upstroke Velocity (um/s) - Q2 (10)	AP Amplitude (mV) (40)
Wnt Inhibition Duration - 6 days (4)	AP Amplitude (mV) (40)
Wnt Inhibitor - BMP4 (7)	AP Amplitude (mV) (40)
hiPSC Backbone Media - Differentiation (1)	AP Amplitude (mV) (40)
hiPSC Backbone Media - StemFit (5)	AP Amplitude (mV) (40)
hiPSC Line - 201B6 (3)	AP Amplitude (mV) (40)
hiPSC Line - 201B7 (9)	AP Amplitude (mV) (40)
hiPSC Line - Cellapy (4)	AP Amplitude (mV) (40)
hiPSC Line - Gibco episomal (10)	AP Amplitude (mV) (40)
hiPSC Line - PGP1 (11)	AP Amplitude (mV) (40)
hiPSC Line - Reported (310)	AP Amplitude (mV) (40)
hiPSC-CM Backbone Media - Cor.4U Complete Medium (6)	AP Amplitude (mV) (40)
hiPSC-CM Maintenance/Maturation Media (if different) - DMEM (11)	AP Amplitude (mV) (40)
hiPSC-CM Maintenance/Maturation Media (if different) - Modified Essential Medium (1)	AP Amplitude (mV) (40)
hiPSC-CM Matrix Coating if Replated - Geltrex (10)	AP Amplitude (mV) (40)
hiPSC-CM Matrix Coating if Replated - Laminin (5)	AP Amplitude (mV) (40)
hiPSC-CM Media Supplement - Mercaptoethanol (10)	AP Amplitude (mV) (40)
hiPSC-CM Media Supplement - Nonessential Amino Acids (7)	AP Amplitude (mV) (40)
hiPSC-CM Media Supplement - VEGF (4)	AP Amplitude (mV) (40)
hiPSC-CM Media Supplement - bFGF (3)	AP Amplitude (mV) (40)
2D % Confluency - 70 to 79 (5)	AP Conduction Velocity (cm/s) (28)
2D % Confluency - 80 to 84 (4)	AP Conduction Velocity (cm/s) (28)
2D % Confluency - 90 to 94 (10)	AP Conduction Velocity (cm/s) (28)
2D % Confluency - 95 to 100 (13)	AP Conduction Velocity (cm/s) (28)
2D Surface - Decellularized ECM (3)	AP Conduction Velocity (cm/s) (28)
2D Surface - Microparticle/fluid (3)	AP Conduction Velocity (cm/s) (28)
2D Surface - Nanotopography (6)	AP Conduction Velocity (cm/s) (28)
3D % Confluency - 80 to 84 (6)	AP Conduction Velocity (cm/s) (28)
3D % Confluency - 90 to 94 (11)	AP Conduction Velocity (cm/s) (28)
3D % Confluency - 95 to 100 (15)	AP Conduction Velocity (cm/s) (28)
3D Endothelial Cell Type - CMVEC (5)	AP Conduction Velocity (cm/s) (28)
3D Endothelial Cell Type - Specialised (3)	AP Conduction Velocity (cm/s) (28)
3D Estimated Tissue Size (mm2) Q3 4 to 20 (33)	AP Conduction Velocity (cm/s) (28)
3D Platform - Fibronectin (3)	AP Conduction Velocity (cm/s) (28)
3D Platform - Gelatin (6)	AP Conduction Velocity (cm/s) (28)
3D Platform - Nanotechnology (3)	AP Conduction Velocity (cm/s) (28)
3D Stromal Cell Type - Specialised (11)	AP Conduction Velocity (cm/s) (28)
3D Stromal Cell Type - hDF (7)	AP Conduction Velocity (cm/s) (28)
3D Stromal Cell Type - hMSC (12)	AP Conduction Velocity (cm/s) (28)
3D Stromal Cell Type - hiPSC-MC (3)	AP Conduction Velocity (cm/s) (28)
3D Tissue Media - Cor.4U (3)	AP Conduction Velocity (cm/s) (28)
3D Tissue Media - EGM2 (6)	AP Conduction Velocity (cm/s) (28)
3D Tissue Media - MEM-α (6)	AP Conduction Velocity (cm/s) (28)
3D Tissue Media - Specialised (4)	AP Conduction Velocity (cm/s) (28)
3D Tissue Media - StemPro-34 (4)	AP Conduction Velocity (cm/s) (28)
AP Amplitude (mV) - Q3 (9)	AP Conduction Velocity (cm/s) (28)
AP Conduction Velocity (cm/s) - Q1 (7)	AP Conduction Velocity (cm/s) (28)
AP Conduction Velocity (cm/s) - Q2 (8)	AP Conduction Velocity (cm/s) (28)
AP Conduction Velocity (cm/s) - Q3 (6)	AP Conduction Velocity (cm/s) (28)
AP Conduction Velocity (cm/s) - Q4 (7)	AP Conduction Velocity (cm/s) (28)
AP Conduction Velocity (cm/s) - Reported (28)	AP Conduction Velocity (cm/s) (28)
AP Conduction Velocity (cm/s) Quantiles (28)	AP Conduction Velocity (cm/s) (28)
Beat Rate (beats per minute) - Q1 (15)	AP Conduction Velocity (cm/s) (28)
Beat Rate (beats per minute) - Q3 (10)	AP Conduction Velocity (cm/s) (28)
Differentiation Purity % - 70 to 74 (10)	AP Conduction Velocity (cm/s) (28)
Differentiation Purity % - 75 to 79 (8)	AP Conduction Velocity (cm/s) (28)
Differentiation Purity % - <60 (9)	AP Conduction Velocity (cm/s) (28)
Differentiation Purity Assessment - Flow Cytometry a-actinin+ (9)	AP Conduction Velocity (cm/s) (28)
Differentiation Purity Assessment - Flow Cytometry cTnI+ (3)	AP Conduction Velocity (cm/s) (28)
Differentiation Purity Assessment - Visual Inspection (4)	AP Conduction Velocity (cm/s) (28)
Disease Modelling - Acute Myocardial Infarction (4)	AP Conduction Velocity (cm/s) (28)
Disease Modelling - DCM (5)	AP Conduction Velocity (cm/s) (28)
Disease Modelling - Fibrotic (3)	AP Conduction Velocity (cm/s) (28)
Disease Modelling - Ischemic/Infarction (7)	AP Conduction Velocity (cm/s) (28)
Disease Modelling - Myocardium (11)	AP Conduction Velocity (cm/s) (28)
Electrophysiology Analysis Method - Genetical (3)	AP Conduction Velocity (cm/s) (28)
Electrophysiology Analysis Method - Motion-Contrast Reconstruction (4)	AP Conduction Velocity (cm/s) (28)
Force (mN) - Q3 (11)	AP Conduction Velocity (cm/s) (28)
Gene Analysis Method - Specialised (6)	AP Conduction Velocity (cm/s) (28)
Induction Conditions - Specialised (5)	AP Conduction Velocity (cm/s) (28)
Induction Conditions - StemCell Differentiation Kit (4)	AP Conduction Velocity (cm/s) (28)
Induction Conditions - Wnt3a (3)	AP Conduction Velocity (cm/s) (28)
Induction Duration - 3 days (37)	AP Conduction Velocity (cm/s) (28)
Induction Duration - 4 days (15)	AP Conduction Velocity (cm/s) (28)
Induction Duration - 5 days (8)	AP Conduction Velocity (cm/s) (28)
Max Capture Rate (Hz) - Q1 (8)	AP Conduction Velocity (cm/s) (28)
Metabolic Analysis Method - Mitochondrial (4)	AP Conduction Velocity (cm/s) (28)
Metabolic Maturation Strategy (Broad) - Amino Acids and Derivatives (5)	AP Conduction Velocity (cm/s) (28)
Metabolic Maturation Strategy (Broad) - Serum and Serum Replacements (3)	AP Conduction Velocity (cm/s) (28)
Metabolic Maturation Strategy (Broad) - Specialised (4)	AP Conduction Velocity (cm/s) (28)
Metabolic Maturation Strategy (Broad) - Structural and Functional Protein (5)	AP Conduction Velocity (cm/s) (28)
Metabolic Maturation Strategy (Broad) - Sugar and Carbohydrates (7)	AP Conduction Velocity (cm/s) (28)
Metabolic Maturation Strategy (Broad) - Vitamins and Minerals (3)	AP Conduction Velocity (cm/s) (28)
Metabolic Maturation Strategy - Albumax (3)	AP Conduction Velocity (cm/s) (28)
Metabolic Maturation Strategy - Ascorbic Acid (3)	AP Conduction Velocity (cm/s) (28)
Metabolic Maturation Strategy - B27 (3)	AP Conduction Velocity (cm/s) (28)
Metabolic Maturation Strategy - Biotin (3)	AP Conduction Velocity (cm/s) (28)
Metabolic Maturation Strategy - Creatine (3)	AP Conduction Velocity (cm/s) (28)
Metabolic Maturation Strategy - Galactose (3)	AP Conduction Velocity (cm/s) (28)
Metabolic Maturation Strategy - IGF-1 (3)	AP Conduction Velocity (cm/s) (28)
Metabolic Maturation Strategy - KOSR (3)	AP Conduction Velocity (cm/s) (28)
Metabolic Maturation Strategy - Lactate (4)	AP Conduction Velocity (cm/s) (28)
Metabolic Maturation Strategy - Linoleic/Oleic Acid (4)	AP Conduction Velocity (cm/s) (28)
Metabolic Maturation Strategy - Nonessential Amino Acids (3)	AP Conduction Velocity (cm/s) (28)
Metabolic Maturation Strategy - Taurine (3)	AP Conduction Velocity (cm/s) (28)
Metabolic Maturation Strategy - Vitamin B12 (3)	AP Conduction Velocity (cm/s) (28)
Pharmacological Interventions - Blebbistatin (5)	AP Conduction Velocity (cm/s) (28)
Pharmacological Interventions - Doxorubicin (17)	AP Conduction Velocity (cm/s) (28)
Pharmacological Interventions - Epinephrine (10)	AP Conduction Velocity (cm/s) (28)
Pharmacological Interventions - Phenylephrine (3)	AP Conduction Velocity (cm/s) (28)
Pharmacological Interventions - Propranolol (5)	AP Conduction Velocity (cm/s) (28)
Pharmacological Interventions - T3 (3)	AP Conduction Velocity (cm/s) (28)
Pharmacological Interventions - Thalidomide (3)	AP Conduction Velocity (cm/s) (28)
Purification Duration - 3 days (12)	AP Conduction Velocity (cm/s) (28)
Purification Duration - 5 days (6)	AP Conduction Velocity (cm/s) (28)
Purification Duration - 7 days (6)	AP Conduction Velocity (cm/s) (28)
Purification Duration - 8 days (4)	AP Conduction Velocity (cm/s) (28)
Purification Duration - <3 days (17)	AP Conduction Velocity (cm/s) (28)
Purification Stategy - Antibiotic (3)	AP Conduction Velocity (cm/s) (28)
Purification Stategy - Media (6)	AP Conduction Velocity (cm/s) (28)
Sarcomere Length (um) Q1 <1.7 (19)	AP Conduction Velocity (cm/s) (28)
Stress (mN/mm2) - Q1 (10)	AP Conduction Velocity (cm/s) (28)
Stress (mN/mm2) - Q2 (9)	AP Conduction Velocity (cm/s) (28)
Time to Peak (ms) - Q1 (11)	AP Conduction Velocity (cm/s) (28)
Time to Peak (ms) - Q3 (10)	AP Conduction Velocity (cm/s) (28)
Time to Relaxation (ms) - Q2 (5)	AP Conduction Velocity (cm/s) (28)
Upstroke Velocity (um/s) - Q1 (10)	AP Conduction Velocity (cm/s) (28)
Wnt Inhibition Duration - 5 days (6)	AP Conduction Velocity (cm/s) (28)
Wnt Inhibition Duration - >6 days (12)	AP Conduction Velocity (cm/s) (28)
Wnt Inhibitor - BMP4 (7)	AP Conduction Velocity (cm/s) (28)
Wnt Inhibitor - VEGF (3)	AP Conduction Velocity (cm/s) (28)
hiPSC Backbone Media - Conditioned (12)	AP Conduction Velocity (cm/s) (28)
hiPSC Backbone Media - DMEM (10)	AP Conduction Velocity (cm/s) (28)
hiPSC Backbone Media - Differentiation (1)	AP Conduction Velocity (cm/s) (28)
hiPSC Backbone Media - Specialised (17)	AP Conduction Velocity (cm/s) (28)
hiPSC Backbone Media - StemFit (5)	AP Conduction Velocity (cm/s) (28)
hiPSC Backbone Media - StemFlex (5)	AP Conduction Velocity (cm/s) (28)
hiPSC Line - 201B6 (3)	AP Conduction Velocity (cm/s) (28)
hiPSC Line - 201B7 (9)	AP Conduction Velocity (cm/s) (28)
hiPSC Line - 253G1 (10)	AP Conduction Velocity (cm/s) (28)
hiPSC Line - BJ RiPS (4)	AP Conduction Velocity (cm/s) (28)
hiPSC Line - Cellapy (4)	AP Conduction Velocity (cm/s) (28)
hiPSC Line - DF19-9-11T.H (16)	AP Conduction Velocity (cm/s) (28)
hiPSC Line - Gibco episomal (10)	AP Conduction Velocity (cm/s) (28)
hiPSC Line - IMR90 (19)	AP Conduction Velocity (cm/s) (28)
hiPSC Line - PGP1 (11)	AP Conduction Velocity (cm/s) (28)
hiPSC Line - SCVI-273 (8)	AP Conduction Velocity (cm/s) (28)
hiPSC-CM Backbone Media - Commercial Cardiomyocyte Kit (12)	AP Conduction Velocity (cm/s) (28)
hiPSC-CM Maintenance/Maturation Media (if different) - DMEM (11)	AP Conduction Velocity (cm/s) (28)
hiPSC-CM Maintenance/Maturation Media (if different) - Modified Essential Medium (1)	AP Conduction Velocity (cm/s) (28)
hiPSC-CM Maintenance/Maturation Media (if different) - Specialised (8)	AP Conduction Velocity (cm/s) (28)
hiPSC-CM Matrix Coating if Replated - Synthemax (3)	AP Conduction Velocity (cm/s) (28)
hiPSC-CM Media Supplement - Essential Lipids (6)	AP Conduction Velocity (cm/s) (28)
hiPSC-CM Media Supplement - Lipid Mix (5)	AP Conduction Velocity (cm/s) (28)
hiPSC-CM Media Supplement - Nonessential Amino Acids (7)	AP Conduction Velocity (cm/s) (28)
hiPSC-CM Media Supplement - Polyvinylalchohol (6)	AP Conduction Velocity (cm/s) (28)
hiPSC-CM Media Supplement - Selenium (7)	AP Conduction Velocity (cm/s) (28)
hiPSC-CM Media Supplement - bFGF (3)	AP Conduction Velocity (cm/s) (28)
2D Surface - Electrospun (13)	Amplitude (F/F0) (50)
2D Surface - Microparticle/fluid (3)	Amplitude (F/F0) (50)
3D Endothelial Cell Type - Specialised (3)	Amplitude (F/F0) (50)
3D Platform - Fibronectin (3)	Amplitude (F/F0) (50)
3D Platform - Gelatin (6)	Amplitude (F/F0) (50)
3D Platform - Nanotechnology (3)	Amplitude (F/F0) (50)
3D Platform - Polyethylene Glycol (8)	Amplitude (F/F0) (50)
3D Stromal Cell Type - hiPSC-MC (3)	Amplitude (F/F0) (50)
3D Tissue Media - Cor.4U (3)	Amplitude (F/F0) (50)
3D Tissue Media - StemPro-34 (4)	Amplitude (F/F0) (50)
AP Conduction Velocity (cm/s) - Q2 (8)	Amplitude (F/F0) (50)
Amplitude (F/F0) - Q1 (13)	Amplitude (F/F0) (50)
Amplitude (F/F0) - Q2 (13)	Amplitude (F/F0) (50)
Amplitude (F/F0) - Q3 (12)	Amplitude (F/F0) (50)
Amplitude (F/F0) - Q4 (12)	Amplitude (F/F0) (50)
Amplitude (F/F0) - Reported (50)	Amplitude (F/F0) (50)
Amplitude (F/F0) Quantiles (50)	Amplitude (F/F0) (50)
Contractile Analysis Method - Specialised (6)	Amplitude (F/F0) (50)
Differentiation Purity % - <60 (9)	Amplitude (F/F0) (50)
Differentiation Purity Assessment - Visual Inspection (4)	Amplitude (F/F0) (50)
Disease Modelling - Long QT Syndrome (3)	Amplitude (F/F0) (50)
Disease Modelling - Metabolic Disorders (4)	Amplitude (F/F0) (50)
Disease Modelling - Specialised (3)	Amplitude (F/F0) (50)
Electrophysiology Analysis Method - Motion-Contrast Reconstruction (4)	Amplitude (F/F0) (50)
Induction Conditions - Specialised (5)	Amplitude (F/F0) (50)
Induction Conditions - Wnt3a (3)	Amplitude (F/F0) (50)
Induction Duration - 5 days (8)	Amplitude (F/F0) (50)
Metabolic Analysis Method - Mitochondrial (4)	Amplitude (F/F0) (50)
Metabolic Maturation Strategy (Broad) - Insulin and Related Components (3)	Amplitude (F/F0) (50)
Metabolic Maturation Strategy (Broad) - Nutrition and Supplements (6)	Amplitude (F/F0) (50)
Metabolic Maturation Strategy (Broad) - Serum and Serum Replacements (3)	Amplitude (F/F0) (50)
Metabolic Maturation Strategy (Broad) - Vitamins and Minerals (3)	Amplitude (F/F0) (50)
Metabolic Maturation Strategy - Albumax (3)	Amplitude (F/F0) (50)
Metabolic Maturation Strategy - Ascorbic Acid (3)	Amplitude (F/F0) (50)
Metabolic Maturation Strategy - B27 (3)	Amplitude (F/F0) (50)
Metabolic Maturation Strategy - Biotin (3)	Amplitude (F/F0) (50)
Metabolic Maturation Strategy - Creatine (3)	Amplitude (F/F0) (50)
Metabolic Maturation Strategy - Insulin-Transferrin-Selenium (3)	Amplitude (F/F0) (50)
Metabolic Maturation Strategy - KOSR (3)	Amplitude (F/F0) (50)
Metabolic Maturation Strategy - L-carnitine (6)	Amplitude (F/F0) (50)
Metabolic Maturation Strategy - Nonessential Amino Acids (3)	Amplitude (F/F0) (50)
Metabolic Maturation Strategy - Taurine (3)	Amplitude (F/F0) (50)
Metabolic Maturation Strategy - Vitamin B12 (3)	Amplitude (F/F0) (50)
Number of hiPSC Lines - Reported (313)	Amplitude (F/F0) (50)
Pharmacological Interventions - Blebbistatin (5)	Amplitude (F/F0) (50)
Pharmacological Interventions - Carbenoxolone (4)	Amplitude (F/F0) (50)
Pharmacological Interventions - Doxorubicin (17)	Amplitude (F/F0) (50)
Pharmacological Interventions - Lidocaine (7)	Amplitude (F/F0) (50)
Pharmacological Interventions - Metoprolol (5)	Amplitude (F/F0) (50)
Pharmacological Interventions - Phenylephrine (3)	Amplitude (F/F0) (50)
Pharmacological Interventions - Propranolol (5)	Amplitude (F/F0) (50)
Pharmacological Interventions - Ranolazine (6)	Amplitude (F/F0) (50)
Pharmacological Interventions - Thalidomide (3)	Amplitude (F/F0) (50)
Purification Duration - 5 days (6)	Amplitude (F/F0) (50)
Purification Duration - 7 days (6)	Amplitude (F/F0) (50)
Purification Stategy - Antibiotic (3)	Amplitude (F/F0) (50)
Purification Stategy - Cell Sorting (7)	Amplitude (F/F0) (50)
Purification Stategy - Media (6)	Amplitude (F/F0) (50)
Upstroke Velocity (um/s) - Q1 (10)	Amplitude (F/F0) (50)
Upstroke Velocity (um/s) - Q3 (11)	Amplitude (F/F0) (50)
Wnt Inhibition Duration - 6 days (4)	Amplitude (F/F0) (50)
Wnt Inhibitor - DS-I-7 (11)	Amplitude (F/F0) (50)
Wnt Inhibitor - KY02111 (7)	Amplitude (F/F0) (50)
Wnt Inhibitor - VEGF (3)	Amplitude (F/F0) (50)
hiPSC Backbone Media - DMEM (10)	Amplitude (F/F0) (50)
hiPSC Backbone Media - Specialised (17)	Amplitude (F/F0) (50)
hiPSC Backbone Media - StemFit (5)	Amplitude (F/F0) (50)
hiPSC Line - 201B6 (3)	Amplitude (F/F0) (50)
hiPSC Line - 201B7 (9)	Amplitude (F/F0) (50)
hiPSC Line - C25 (6)	Amplitude (F/F0) (50)
hiPSC Line - Cellapy (4)	Amplitude (F/F0) (50)
hiPSC Line - Cor.4U (16)	Amplitude (F/F0) (50)
hiPSC Line - Reported (310)	Amplitude (F/F0) (50)
hiPSC-CM Backbone Media - Cor.4U Complete Medium (6)	Amplitude (F/F0) (50)
hiPSC-CM Maintenance/Maturation Media (if different) - DMEM/F12 (6)	Amplitude (F/F0) (50)
hiPSC-CM Maintenance/Maturation Media (if different) - Modified Essential Medium (1)	Amplitude (F/F0) (50)
hiPSC-CM Matrix Coating if Replated - Laminin (5)	Amplitude (F/F0) (50)
hiPSC-CM Matrix Coating if Replated - Synthemax (3)	Amplitude (F/F0) (50)
hiPSC-CM Media Supplement - Essential Lipids (6)	Amplitude (F/F0) (50)
hiPSC-CM Media Supplement - FBS (16)	Amplitude (F/F0) (50)
hiPSC-CM Media Supplement - GlutaMax (8)	Amplitude (F/F0) (50)
hiPSC-CM Media Supplement - HEPES (16)	Amplitude (F/F0) (50)
hiPSC-CM Media Supplement - L-glutamine (19)	Amplitude (F/F0) (50)
hiPSC-CM Media Supplement - Lipid Mix (5)	Amplitude (F/F0) (50)
hiPSC-CM Media Supplement - Mercaptoethanol (10)	Amplitude (F/F0) (50)
hiPSC-CM Media Supplement - Nonessential Amino Acids (7)	Amplitude (F/F0) (50)
hiPSC-CM Media Supplement - Polyvinylalchohol (6)	Amplitude (F/F0) (50)
hiPSC-CM Media Supplement - Selenium (7)	Amplitude (F/F0) (50)
hiPSC-CM Media Supplement - VEGF (4)	Amplitude (F/F0) (50)
hiPSC-CM Media Supplement - bFGF (3)	Amplitude (F/F0) (50)
2D % Confluency - EB (13)	Beat Rate (beats per minute) (54)
2D Surface - Decellularized ECM (3)	Beat Rate (beats per minute) (54)
2D Surface - Hydrogel (14)	Beat Rate (beats per minute) (54)
2D Surface - Microparticle/fluid (3)	Beat Rate (beats per minute) (54)
3D Endothelial Cell Type - CMVEC (5)	Beat Rate (beats per minute) (54)
3D Stromal Cell Type - hiPSC-MC (3)	Beat Rate (beats per minute) (54)
3D Tissue Media - Cor.4U (3)	Beat Rate (beats per minute) (54)
3D Tissue Media - Specialised (4)	Beat Rate (beats per minute) (54)
AP Amplitude (mV) - Q1 (11)	Beat Rate (beats per minute) (54)
AP Conduction Velocity (cm/s) - Q3 (6)	Beat Rate (beats per minute) (54)
AP Conduction Velocity (cm/s) - Q4 (7)	Beat Rate (beats per minute) (54)
Beat Rate (beats per minute) - Q1 (15)	Beat Rate (beats per minute) (54)
Beat Rate (beats per minute) - Q2 (16)	Beat Rate (beats per minute) (54)
Beat Rate (beats per minute) - Q3 (10)	Beat Rate (beats per minute) (54)
Beat Rate (beats per minute) - Q4 (13)	Beat Rate (beats per minute) (54)
Beat Rate (beats per minute) - Reported (54)	Beat Rate (beats per minute) (54)
Beat Rate (beats per minute) Quantiles (54)	Beat Rate (beats per minute) (54)
Calcium Handling Analysis Method - Specialised (3)	Beat Rate (beats per minute) (54)
Contractile Analysis Method - Specialised (6)	Beat Rate (beats per minute) (54)
Differentiation Purity Assessment - Flow Cytometry VCAM1+ (4)	Beat Rate (beats per minute) (54)
Disease Modelling - Metabolic Disorders (4)	Beat Rate (beats per minute) (54)
Disease Modelling - Specialised (3)	Beat Rate (beats per minute) (54)
Electrophysiology Analysis Method - Genetical (3)	Beat Rate (beats per minute) (54)
Electrophysiology Analysis Method - Motion-Contrast Reconstruction (4)	Beat Rate (beats per minute) (54)
Force (mN) - Q1 (13)	Beat Rate (beats per minute) (54)
Force (mN) - Q4 (12)	Beat Rate (beats per minute) (54)
Gene Analysis Method - Specialised (6)	Beat Rate (beats per minute) (54)
Induction Conditions - Specialised (5)	Beat Rate (beats per minute) (54)
Induction Conditions - Wnt3a (3)	Beat Rate (beats per minute) (54)
Metabolic Analysis Method - Mitochondrial (4)	Beat Rate (beats per minute) (54)
Metabolic Analysis Method - Specialised (8)	Beat Rate (beats per minute) (54)
Metabolic Maturation Strategy (Broad) - Amino Acids and Derivatives (5)	Beat Rate (beats per minute) (54)
Metabolic Maturation Strategy (Broad) - Growth Factors (4)	Beat Rate (beats per minute) (54)
Metabolic Maturation Strategy (Broad) - Insulin and Related Components (3)	Beat Rate (beats per minute) (54)
Metabolic Maturation Strategy (Broad) - Metabolic Modulation (19)	Beat Rate (beats per minute) (54)
Metabolic Maturation Strategy (Broad) - Nutrition and Supplements (6)	Beat Rate (beats per minute) (54)
Metabolic Maturation Strategy (Broad) - Serum and Serum Replacements (3)	Beat Rate (beats per minute) (54)
Metabolic Maturation Strategy (Broad) - Specialised (4)	Beat Rate (beats per minute) (54)
Metabolic Maturation Strategy (Broad) - Structural and Functional Protein (5)	Beat Rate (beats per minute) (54)
Metabolic Maturation Strategy (Broad) - Sugar and Carbohydrates (7)	Beat Rate (beats per minute) (54)
Metabolic Maturation Strategy (Broad) - Vitamins and Minerals (3)	Beat Rate (beats per minute) (54)
Metabolic Maturation Strategy - Albumax (3)	Beat Rate (beats per minute) (54)
Metabolic Maturation Strategy - Ascorbic Acid (3)	Beat Rate (beats per minute) (54)
Metabolic Maturation Strategy - B27 (3)	Beat Rate (beats per minute) (54)
Metabolic Maturation Strategy - Biotin (3)	Beat Rate (beats per minute) (54)
Metabolic Maturation Strategy - Creatine (3)	Beat Rate (beats per minute) (54)
Metabolic Maturation Strategy - Galactose (3)	Beat Rate (beats per minute) (54)
Metabolic Maturation Strategy - IGF-1 (3)	Beat Rate (beats per minute) (54)
Metabolic Maturation Strategy - Insulin-Transferrin-Selenium (3)	Beat Rate (beats per minute) (54)
Metabolic Maturation Strategy - KOSR (3)	Beat Rate (beats per minute) (54)
Metabolic Maturation Strategy - L-carnitine (6)	Beat Rate (beats per minute) (54)
Metabolic Maturation Strategy - Lactate (4)	Beat Rate (beats per minute) (54)
Metabolic Maturation Strategy - Nonessential Amino Acids (3)	Beat Rate (beats per minute) (54)
Metabolic Maturation Strategy - Reported (30)	Beat Rate (beats per minute) (54)
Metabolic Maturation Strategy - Taurine (3)	Beat Rate (beats per minute) (54)
Metabolic Maturation Strategy - Vitamin B12 (3)	Beat Rate (beats per minute) (54)
Number of hiPSC Lines - Reported (313)	Beat Rate (beats per minute) (54)
Pharmacological Interventions - Caffeine (4)	Beat Rate (beats per minute) (54)
Pharmacological Interventions - Metoprolol (5)	Beat Rate (beats per minute) (54)
Pharmacological Interventions - T3 (3)	Beat Rate (beats per minute) (54)
Purification Duration - >9 days (5)	Beat Rate (beats per minute) (54)
Purification Stategy - Antibiotic (3)	Beat Rate (beats per minute) (54)
Purification Stategy - Cell Sorting (7)	Beat Rate (beats per minute) (54)
Resting Membrane Potential (mV) - Q2 (13)	Beat Rate (beats per minute) (54)
Resting Membrane Potential (mV) - Q4 (9)	Beat Rate (beats per minute) (54)
Stress (mN/mm2) - Q3 (9)	Beat Rate (beats per minute) (54)
Upstroke Velocity (um/s) - Q4 (9)	Beat Rate (beats per minute) (54)
Wnt Inhibition Duration - 6 days (4)	Beat Rate (beats per minute) (54)
Wnt Inhibitor - KY02111 (7)	Beat Rate (beats per minute) (54)
Wnt Inhibitor - Others (9)	Beat Rate (beats per minute) (54)
Wnt Inhibitor - VEGF (3)	Beat Rate (beats per minute) (54)
hiPSC Backbone Media - Differentiation (1)	Beat Rate (beats per minute) (54)
hiPSC Line - 201B6 (3)	Beat Rate (beats per minute) (54)
hiPSC Line - 201B7 (9)	Beat Rate (beats per minute) (54)
hiPSC Line - BJ1 (7)	Beat Rate (beats per minute) (54)
hiPSC Line - C25 (6)	Beat Rate (beats per minute) (54)
hiPSC Line - Cellapy (4)	Beat Rate (beats per minute) (54)
hiPSC Line - Reported (310)	Beat Rate (beats per minute) (54)
hiPSC-CM Backbone Media - Cor.4U Complete Medium (6)	Beat Rate (beats per minute) (54)
hiPSC-CM Maintenance/Maturation Media (if different) - DMEM/F12 (6)	Beat Rate (beats per minute) (54)
hiPSC-CM Maintenance/Maturation Media (if different) - Modified Essential Medium (1)	Beat Rate (beats per minute) (54)
hiPSC-CM Matrix Coating if Replated - Laminin (5)	Beat Rate (beats per minute) (54)
hiPSC-CM Media Supplement - Essential Lipids (6)	Beat Rate (beats per minute) (54)
hiPSC-CM Media Supplement - GlutaMax (8)	Beat Rate (beats per minute) (54)
hiPSC-CM Media Supplement - Selenium (7)	Beat Rate (beats per minute) (54)
hiPSC-CM Media Supplement - Specialised (13)	Beat Rate (beats per minute) (54)
hiPSC-CM Media Supplement - VEGF (4)	Beat Rate (beats per minute) (54)
hiPSC-CM Media Supplement - bFGF (3)	Beat Rate (beats per minute) (54)
2D % Confluency - 70 to 79 (5)	Conduction Velocity (cm/s) (14)
2D % Confluency - 80 to 84 (4)	Conduction Velocity (cm/s) (14)
2D % Confluency - 90 to 94 (10)	Conduction Velocity (cm/s) (14)
2D % Confluency - 95 to 100 (13)	Conduction Velocity (cm/s) (14)
2D % Confluency - EB (13)	Conduction Velocity (cm/s) (14)
2D Surface - Decellularized ECM (3)	Conduction Velocity (cm/s) (14)
2D Surface - Hydrogel (14)	Conduction Velocity (cm/s) (14)
2D Surface - Microelectrode Array (9)	Conduction Velocity (cm/s) (14)
2D Surface - Microparticle/fluid (3)	Conduction Velocity (cm/s) (14)
2D Surface - Micropatterned (24)	Conduction Velocity (cm/s) (14)
2D Surface - Nanotopography (6)	Conduction Velocity (cm/s) (14)
2D Surface - Reported (137)(177)	Conduction Velocity (cm/s) (14)
3D % Confluency - 70 to 79 (4)	Conduction Velocity (cm/s) (14)
3D % Confluency - 80 to 84 (6)	Conduction Velocity (cm/s) (14)
3D % Confluency - 90 to 94 (11)	Conduction Velocity (cm/s) (14)
3D % Confluency - 95 to 100 (15)	Conduction Velocity (cm/s) (14)
3D % Confluency - EB (31)	Conduction Velocity (cm/s) (14)
3D % Confluency - Reported (239)	Conduction Velocity (cm/s) (14)
3D CM % Composition - <75 (35)	Conduction Velocity (cm/s) (14)
3D EC % Composition - Reported (150)	Conduction Velocity (cm/s) (14)
3D Endothelial Cell Type - CMVEC (5)	Conduction Velocity (cm/s) (14)
3D Endothelial Cell Type - HUVEC (9)	Conduction Velocity (cm/s) (14)
3D Endothelial Cell Type - Reported (33)	Conduction Velocity (cm/s) (14)
3D Endothelial Cell Type - Specialised (3)	Conduction Velocity (cm/s) (14)
3D Estimated Tissue Cell Density (10^6 cells/mL) Q2 2.82 to 10.8 (40)	Conduction Velocity (cm/s) (14)
3D Estimated Tissue Cell Density (10^6 cells/mL) Q3 >10.8 (40)	Conduction Velocity (cm/s) (14)
3D Estimated Tissue Size (mm2) Q1 <0.28 (34)	Conduction Velocity (cm/s) (14)
3D Estimated Tissue Size (mm2) Q3 >20 (32)	Conduction Velocity (cm/s) (14)
3D Estimated Tissue Size (mm2) Quantiles (133)	Conduction Velocity (cm/s) (14)
3D Platform - 3D printed (9)	Conduction Velocity (cm/s) (14)
3D Platform - Collagen (37)	Conduction Velocity (cm/s) (14)
3D Platform - Fibronectin (3)	Conduction Velocity (cm/s) (14)
3D Platform - Gelatin (6)	Conduction Velocity (cm/s) (14)
3D Platform - Nanotechnology (3)	Conduction Velocity (cm/s) (14)
3D Platform - Polyethylene Glycol (8)	Conduction Velocity (cm/s) (14)
3D Stromal Cell Type - Reported (77)	Conduction Velocity (cm/s) (14)
3D Stromal Cell Type - SMC (3)	Conduction Velocity (cm/s) (14)
3D Stromal Cell Type - Specialised (11)	Conduction Velocity (cm/s) (14)
3D Stromal Cell Type - hFF (6)	Conduction Velocity (cm/s) (14)
3D Stromal Cell Type - hMSC (12)	Conduction Velocity (cm/s) (14)
3D Stromal Cell Type - hiPSC-CF (8)	Conduction Velocity (cm/s) (14)
3D Stromal Cell Type - hiPSC-MC (3)	Conduction Velocity (cm/s) (14)
3D Tissue Media - Cor.4U (3)	Conduction Velocity (cm/s) (14)
3D Tissue Media - Iscove (5)	Conduction Velocity (cm/s) (14)
3D Tissue Media - MEM-α (6)	Conduction Velocity (cm/s) (14)
3D Tissue Media - Reported (157)	Conduction Velocity (cm/s) (14)
3D Tissue Media - Specialised (4)	Conduction Velocity (cm/s) (14)
3D Tissue Media - StemPro-34 (4)	Conduction Velocity (cm/s) (14)
3D Tissue Media - iCell Maintenance Medium (12)	Conduction Velocity (cm/s) (14)
AP Amplitude (mV) - Q2 (10)	Conduction Velocity (cm/s) (14)
AP Amplitude (mV) - Q3 (9)	Conduction Velocity (cm/s) (14)
AP Conduction Velocity (cm/s) - Q1 (7)	Conduction Velocity (cm/s) (14)
AP Conduction Velocity (cm/s) - Q2 (8)	Conduction Velocity (cm/s) (14)
AP Conduction Velocity (cm/s) - Q3 (6)	Conduction Velocity (cm/s) (14)
AP Conduction Velocity (cm/s) - Q4 (7)	Conduction Velocity (cm/s) (14)
AP Conduction Velocity (cm/s) - Reported (28)	Conduction Velocity (cm/s) (14)
AP Conduction Velocity (cm/s) Quantiles (28)	Conduction Velocity (cm/s) (14)
Amplitude (F/F0) - Q1 (13)	Conduction Velocity (cm/s) (14)
Amplitude (F/F0) - Q2 (13)	Conduction Velocity (cm/s) (14)
Amplitude (F/F0) - Q3 (12)	Conduction Velocity (cm/s) (14)
Amplitude (F/F0) - Q4 (12)	Conduction Velocity (cm/s) (14)
Ancestry of hiPSC Lines - Asian (30)	Conduction Velocity (cm/s) (14)
Beat Rate (beats per minute) - Q2 (16)	Conduction Velocity (cm/s) (14)
Beat Rate (beats per minute) - Q4 (13)	Conduction Velocity (cm/s) (14)
CM Immunofluorescent Imaging (261)	Conduction Velocity (cm/s) (14)
Calcium Handling Analysis Method - Genetical (23)	Conduction Velocity (cm/s) (14)
Calcium Handling Analysis Method - Reported (124)	Conduction Velocity (cm/s) (14)
Calcium Handling Analysis Method - Specialised (3)	Conduction Velocity (cm/s) (14)
Cell Alignment Maturation (55)	Conduction Velocity (cm/s) (14)
Conduction Velocity (cm/s) - Q1 (7)	Conduction Velocity (cm/s) (14)
Conduction Velocity (cm/s) - Q2 (7)	Conduction Velocity (cm/s) (14)
Conduction Velocity (cm/s) - Reported (14)	Conduction Velocity (cm/s) (14)
Conduction Velocity (cm/s) Quantiles (14)	Conduction Velocity (cm/s) (14)
Contractile Analysis Method - Motion Tracking (88)	Conduction Velocity (cm/s) (14)
Contractile Analysis Method - Specialised (6)	Conduction Velocity (cm/s) (14)
Contractile Analysis Method - TFM (8)	Conduction Velocity (cm/s) (14)
Differentiation Purity % - 60 to 69 (5)	Conduction Velocity (cm/s) (14)
Differentiation Purity % - 70 to 74 (10)	Conduction Velocity (cm/s) (14)
Differentiation Purity % - 75 to 79 (8)	Conduction Velocity (cm/s) (14)
Differentiation Purity % - 80 to 84 (25)	Conduction Velocity (cm/s) (14)
Differentiation Purity % - 95 to 100 (35)	Conduction Velocity (cm/s) (14)
Differentiation Purity % - <60 (9)	Conduction Velocity (cm/s) (14)
Differentiation Purity Assessment - Flow Cytometry SIRPA+ (4)	Conduction Velocity (cm/s) (14)
Differentiation Purity Assessment - Flow Cytometry VCAM1+ (4)	Conduction Velocity (cm/s) (14)
Differentiation Purity Assessment - Flow Cytometry cTnI+ (3)	Conduction Velocity (cm/s) (14)
Differentiation Purity Assessment - IHC a-actinin (8)	Conduction Velocity (cm/s) (14)
Differentiation Purity Assessment - Visual Inspection (4)	Conduction Velocity (cm/s) (14)
Disease Modelling - Acute Myocardial Infarction (4)	Conduction Velocity (cm/s) (14)
Disease Modelling - Arrhythmic (15)	Conduction Velocity (cm/s) (14)
Disease Modelling - DCM (5)	Conduction Velocity (cm/s) (14)
Disease Modelling - Fibrotic (3)	Conduction Velocity (cm/s) (14)
Disease Modelling - Genetic Disorders (23)	Conduction Velocity (cm/s) (14)
Disease Modelling - HCM (6)	Conduction Velocity (cm/s) (14)
Disease Modelling - Ischemic/Infarction (7)	Conduction Velocity (cm/s) (14)
Disease Modelling - Left Ventricular (15)	Conduction Velocity (cm/s) (14)
Disease Modelling - Long QT Syndrome (3)	Conduction Velocity (cm/s) (14)
Disease Modelling - Metabolic Disorders (4)	Conduction Velocity (cm/s) (14)
Disease Modelling - Myocardium (11)	Conduction Velocity (cm/s) (14)
Disease Modelling - Reported (50)	Conduction Velocity (cm/s) (14)
Disease Modelling - Specialised (3)	Conduction Velocity (cm/s) (14)
Electrophysiology Analysis Method - Genetical (3)	Conduction Velocity (cm/s) (14)
Electrophysiology Analysis Method - Motion-Contrast Reconstruction (4)	Conduction Velocity (cm/s) (14)
Electrophysiology Analysis Method - Patch Clamp (55)	Conduction Velocity (cm/s) (14)
Extracellular Matrix Maturation (18)	Conduction Velocity (cm/s) (14)
Force (mN) - Q1 (13)	Conduction Velocity (cm/s) (14)
Force (mN) - Q4 (12)	Conduction Velocity (cm/s) (14)
Gene Analysis Method - PCR (131)	Conduction Velocity (cm/s) (14)
Gene Analysis Method - RNA (57)	Conduction Velocity (cm/s) (14)
Induction Conditions - Specialised (5)	Conduction Velocity (cm/s) (14)
Induction Conditions - StemCell Differentiation Kit (4)	Conduction Velocity (cm/s) (14)
Induction Conditions - Wnt3a (3)	Conduction Velocity (cm/s) (14)
Induction Duration - 4 days (15)	Conduction Velocity (cm/s) (14)
Induction Duration - 5 days (8)	Conduction Velocity (cm/s) (14)
Insulin Addition - after Day 7 (26)	Conduction Velocity (cm/s) (14)
Max Capture Rate (Hz) - Q2 (7)	Conduction Velocity (cm/s) (14)
Max Capture Rate (Hz) Quantiles (15)	Conduction Velocity (cm/s) (14)
Measured Fatty Acid Metabolism (18)	Conduction Velocity (cm/s) (14)
Metabolic Analysis Method - Mitochondrial (4)	Conduction Velocity (cm/s) (14)
Metabolic Analysis Method - Specialised (8)	Conduction Velocity (cm/s) (14)
Metabolic Maturation (30)	Conduction Velocity (cm/s) (14)
Metabolic Maturation Strategy (Broad) - Amino Acids and Derivatives (5)	Conduction Velocity (cm/s) (14)
Metabolic Maturation Strategy (Broad) - Fatty Acid and Lipids (19)	Conduction Velocity (cm/s) (14)
Metabolic Maturation Strategy (Broad) - Glucocorticoids (7)	Conduction Velocity (cm/s) (14)
Metabolic Maturation Strategy (Broad) - Growth Factors (4)	Conduction Velocity (cm/s) (14)
Metabolic Maturation Strategy (Broad) - Hormonal Stimulation (15)	Conduction Velocity (cm/s) (14)
Metabolic Maturation Strategy (Broad) - Insulin and Related Components (3)	Conduction Velocity (cm/s) (14)
Metabolic Maturation Strategy (Broad) - Kinase Inhibitors (3)	Conduction Velocity (cm/s) (14)
Metabolic Maturation Strategy (Broad) - Known (30)	Conduction Velocity (cm/s) (14)
Metabolic Maturation Strategy (Broad) - Metabolic Modulation (19)	Conduction Velocity (cm/s) (14)
Metabolic Maturation Strategy (Broad) - Nutrition and Supplements (6)	Conduction Velocity (cm/s) (14)
Metabolic Maturation Strategy (Broad) - Serum and Serum Replacements (3)	Conduction Velocity (cm/s) (14)
Metabolic Maturation Strategy (Broad) - Signaling Pathway Regulators (6)	Conduction Velocity (cm/s) (14)
Metabolic Maturation Strategy (Broad) - Specialised (4)	Conduction Velocity (cm/s) (14)
Metabolic Maturation Strategy (Broad) - Structural and Functional Protein (5)	Conduction Velocity (cm/s) (14)
Metabolic Maturation Strategy (Broad) - Sugar and Carbohydrates (7)	Conduction Velocity (cm/s) (14)
Metabolic Maturation Strategy (Broad) - Thyroid Hormones (14)	Conduction Velocity (cm/s) (14)
Metabolic Maturation Strategy (Broad) - Vitamins and Minerals (3)	Conduction Velocity (cm/s) (14)
Metabolic Maturation Strategy - Albumax (3)	Conduction Velocity (cm/s) (14)
Metabolic Maturation Strategy - Ascorbic Acid (3)	Conduction Velocity (cm/s) (14)
Metabolic Maturation Strategy - B27 (3)	Conduction Velocity (cm/s) (14)
Metabolic Maturation Strategy - Biotin (3)	Conduction Velocity (cm/s) (14)
Metabolic Maturation Strategy - Creatine (3)	Conduction Velocity (cm/s) (14)
Metabolic Maturation Strategy - Dexamethasone (7)	Conduction Velocity (cm/s) (14)
Metabolic Maturation Strategy - Galactose (3)	Conduction Velocity (cm/s) (14)
Metabolic Maturation Strategy - IGF-1 (3)	Conduction Velocity (cm/s) (14)
Metabolic Maturation Strategy - Insulin-Transferrin-Selenium (3)	Conduction Velocity (cm/s) (14)
Metabolic Maturation Strategy - KOSR (3)	Conduction Velocity (cm/s) (14)
Metabolic Maturation Strategy - L-carnitine (6)	Conduction Velocity (cm/s) (14)
Metabolic Maturation Strategy - Lactate (4)	Conduction Velocity (cm/s) (14)
Metabolic Maturation Strategy - Linoleic/Oleic Acid (4)	Conduction Velocity (cm/s) (14)
Metabolic Maturation Strategy - Nonessential Amino Acids (3)	Conduction Velocity (cm/s) (14)
Metabolic Maturation Strategy - Palmitic Acid (10)	Conduction Velocity (cm/s) (14)
Metabolic Maturation Strategy - Reported (30)	Conduction Velocity (cm/s) (14)
Metabolic Maturation Strategy - Specialised (9)	Conduction Velocity (cm/s) (14)
Metabolic Maturation Strategy - T3 (14)	Conduction Velocity (cm/s) (14)
Metabolic Maturation Strategy - Taurine (3)	Conduction Velocity (cm/s) (14)
Metabolic Maturation Strategy - Vitamin B12 (3)	Conduction Velocity (cm/s) (14)
Number of hiPSC Lines - 2 (50)	Conduction Velocity (cm/s) (14)
Number of hiPSC Lines - 3 (27)	Conduction Velocity (cm/s) (14)
Number of hiPSC Lines - 4 (10)	Conduction Velocity (cm/s) (14)
Number of hiPSC Lines - >5 (8)	Conduction Velocity (cm/s) (14)
Number of hiPSC Lines - Reported (313)	Conduction Velocity (cm/s) (14)
Pharmacological Interventions - Blebbistatin (5)	Conduction Velocity (cm/s) (14)
Pharmacological Interventions - Caffeine (4)	Conduction Velocity (cm/s) (14)
Pharmacological Interventions - Carbamylcholine (6)	Conduction Velocity (cm/s) (14)
Pharmacological Interventions - Carbenoxolone (4)	Conduction Velocity (cm/s) (14)
Pharmacological Interventions - Cisapride (5)	Conduction Velocity (cm/s) (14)
Pharmacological Interventions - E4031 (22)	Conduction Velocity (cm/s) (14)
Pharmacological Interventions - Epinephrine (10)	Conduction Velocity (cm/s) (14)
Pharmacological Interventions - Lidocaine (7)	Conduction Velocity (cm/s) (14)
Pharmacological Interventions - Metoprolol (5)	Conduction Velocity (cm/s) (14)
Pharmacological Interventions - Phenylephrine (3)	Conduction Velocity (cm/s) (14)
Pharmacological Interventions - Propranolol (5)	Conduction Velocity (cm/s) (14)
Pharmacological Interventions - Ranolazine (6)	Conduction Velocity (cm/s) (14)
Pharmacological Interventions - Specialised (16)	Conduction Velocity (cm/s) (14)
Pharmacological Interventions - T3 (3)	Conduction Velocity (cm/s) (14)
Pharmacological Interventions - Thalidomide (3)	Conduction Velocity (cm/s) (14)
Purification Duration - 3 days (12)	Conduction Velocity (cm/s) (14)
Purification Duration - 6 days (10)	Conduction Velocity (cm/s) (14)
Purification Duration - 7 days (6)	Conduction Velocity (cm/s) (14)
Purification Duration - <3 days (17)	Conduction Velocity (cm/s) (14)
Purification Duration - >9 days (5)	Conduction Velocity (cm/s) (14)
Purification Stategy - Antibiotic (3)	Conduction Velocity (cm/s) (14)
Purification Stategy - Cell Sorting (7)	Conduction Velocity (cm/s) (14)
Purification Stategy - Media (6)	Conduction Velocity (cm/s) (14)
Resting Membrane Potential (mV) - Q3 (11)	Conduction Velocity (cm/s) (14)
Resting Membrane Potential (mV) - Reported (44)	Conduction Velocity (cm/s) (14)
Sarcomere Length (um) - Mature Q2 1.7 to 1.9 (28)	Conduction Velocity (cm/s) (14)
Sarcomere Length (um) Q1 <1.7 (19)	Conduction Velocity (cm/s) (14)
Scanning Electron Microscopy (21)	Conduction Velocity (cm/s) (14)
Sex of hiPSC Lines - Both (10)	Conduction Velocity (cm/s) (14)
Sex of hiPSC Lines - Known (116)	Conduction Velocity (cm/s) (14)
Sex of hiPSC Lines - Male (64)	Conduction Velocity (cm/s) (14)
Stress (mN/mm2) - Q1 (10)	Conduction Velocity (cm/s) (14)
Stress (mN/mm2) - Q4 (9)	Conduction Velocity (cm/s) (14)
T-tubules Observed (18)	Conduction Velocity (cm/s) (14)
Time to Peak (ms) - Q1 (11)	Conduction Velocity (cm/s) (14)
Time to Peak (ms) - Q2 (10)	Conduction Velocity (cm/s) (14)
Time to Peak (ms) - Q3 (10)	Conduction Velocity (cm/s) (14)
Time to Peak (ms) - Q4 (10)	Conduction Velocity (cm/s) (14)
Time to Peak (ms) - Reported (41)	Conduction Velocity (cm/s) (14)
Time to Peak (ms) Quantiles (41)	Conduction Velocity (cm/s) (14)
Time to Relaxation (ms) - Q1 (5)	Conduction Velocity (cm/s) (14)
Time to Relaxation (ms) - Q2 (5)	Conduction Velocity (cm/s) (14)
Time to Relaxation (ms) - Reported (10)	Conduction Velocity (cm/s) (14)
Time to Relaxation (ms) Quantiles (10)	Conduction Velocity (cm/s) (14)
Upstroke Velocity (um/s) - Q1 (10)	Conduction Velocity (cm/s) (14)
Upstroke Velocity (um/s) - Q3 (11)	Conduction Velocity (cm/s) (14)
Upstroke Velocity (um/s) - Q4 (9)	Conduction Velocity (cm/s) (14)
Upstroke Velocity (um/s) Quantiles (40)	Conduction Velocity (cm/s) (14)
Wnt Inhibition Duration - 4 days (19)	Conduction Velocity (cm/s) (14)
Wnt Inhibition Duration - 5 days (6)	Conduction Velocity (cm/s) (14)
Wnt Inhibition Duration - 6 days (4)	Conduction Velocity (cm/s) (14)
Wnt Inhibition Duration - >6 days (12)	Conduction Velocity (cm/s) (14)
Wnt Inhibitor - BMP4 (7)	Conduction Velocity (cm/s) (14)
Wnt Inhibitor - DS-I-7 (11)	Conduction Velocity (cm/s) (14)
Wnt Inhibitor - KY02111 (7)	Conduction Velocity (cm/s) (14)
Wnt Inhibitor - Others (9)	Conduction Velocity (cm/s) (14)
Wnt Inhibitor - VEGF (3)	Conduction Velocity (cm/s) (14)
Wnt Inhibitor - XAV939 (23)	Conduction Velocity (cm/s) (14)
Wnt Inhibitor - bFGF (8)	Conduction Velocity (cm/s) (14)
hiPSC Backbone Media - DMEM (10)	Conduction Velocity (cm/s) (14)
hiPSC Backbone Media - Differentiation (1)	Conduction Velocity (cm/s) (14)
hiPSC Backbone Media - Embryonic Stem Cell (20)	Conduction Velocity (cm/s) (14)
hiPSC Backbone Media - Specialised (17)	Conduction Velocity (cm/s) (14)
hiPSC Backbone Media - StemFit (5)	Conduction Velocity (cm/s) (14)
hiPSC Backbone Media - StemFlex (5)	Conduction Velocity (cm/s) (14)
hiPSC Line - 201B6 (3)	Conduction Velocity (cm/s) (14)
hiPSC Line - 201B7 (9)	Conduction Velocity (cm/s) (14)
hiPSC Line - ATCC (5)	Conduction Velocity (cm/s) (14)
hiPSC Line - BJ RiPS (4)	Conduction Velocity (cm/s) (14)
hiPSC Line - BJ1 (7)	Conduction Velocity (cm/s) (14)
hiPSC Line - C25 (6)	Conduction Velocity (cm/s) (14)
hiPSC Line - Cellapy (4)	Conduction Velocity (cm/s) (14)
hiPSC Line - Cor.4U (16)	Conduction Velocity (cm/s) (14)
hiPSC Line - DF19-9-11T.H (16)	Conduction Velocity (cm/s) (14)
hiPSC Line - Gibco episomal (10)	Conduction Velocity (cm/s) (14)
hiPSC Line - IMR90 (19)	Conduction Velocity (cm/s) (14)
hiPSC Line - PGP1 (11)	Conduction Velocity (cm/s) (14)
hiPSC Line - Reported (310)	Conduction Velocity (cm/s) (14)
hiPSC Line - SCVI-273 (8)	Conduction Velocity (cm/s) (14)
hiPSC Line - WTC11 (30)	Conduction Velocity (cm/s) (14)
hiPSC-CM Backbone Media - Commercial Cardiomyocyte Kit (12)	Conduction Velocity (cm/s) (14)
hiPSC-CM Backbone Media - Cor.4U Complete Medium (6)	Conduction Velocity (cm/s) (14)
hiPSC-CM Backbone Media - DMEM (18)	Conduction Velocity (cm/s) (14)
hiPSC-CM Backbone Media - IMDM/E8/BPEL/APEL (8)	Conduction Velocity (cm/s) (14)
hiPSC-CM Backbone Media - Reported (301)	Conduction Velocity (cm/s) (14)
hiPSC-CM Maintenance/Maturation Media (if different) - DMEM (11)	Conduction Velocity (cm/s) (14)
hiPSC-CM Maintenance/Maturation Media (if different) - DMEM/F12 (6)	Conduction Velocity (cm/s) (14)
hiPSC-CM Maintenance/Maturation Media (if different) - Modified Essential Medium (1)	Conduction Velocity (cm/s) (14)
hiPSC-CM Maintenance/Maturation Media (if different) - RPMI-1640 (26)	Conduction Velocity (cm/s) (14)
hiPSC-CM Maintenance/Maturation Media (if different) - Specialised (8)	Conduction Velocity (cm/s) (14)
hiPSC-CM Matrix Coating if Replated - Laminin (5)	Conduction Velocity (cm/s) (14)
hiPSC-CM Matrix Coating if Replated - Matrigel (64)	Conduction Velocity (cm/s) (14)
hiPSC-CM Matrix Coating if Replated - Specialised (8)	Conduction Velocity (cm/s) (14)
hiPSC-CM Matrix Coating if Replated - Synthemax (3)	Conduction Velocity (cm/s) (14)
hiPSC-CM Media Supplement - 1-thioglycerol (14)	Conduction Velocity (cm/s) (14)
hiPSC-CM Media Supplement - Albumin (23)	Conduction Velocity (cm/s) (14)
hiPSC-CM Media Supplement - Essential Lipids (6)	Conduction Velocity (cm/s) (14)
hiPSC-CM Media Supplement - FBS (16)	Conduction Velocity (cm/s) (14)
hiPSC-CM Media Supplement - GlutaMax (8)	Conduction Velocity (cm/s) (14)
hiPSC-CM Media Supplement - HEPES (16)	Conduction Velocity (cm/s) (14)
hiPSC-CM Media Supplement - L-ascorbic acid (39)	Conduction Velocity (cm/s) (14)
hiPSC-CM Media Supplement - Lipid Mix (5)	Conduction Velocity (cm/s) (14)
hiPSC-CM Media Supplement - Polyvinylalchohol (6)	Conduction Velocity (cm/s) (14)
hiPSC-CM Media Supplement - Reported (275)	Conduction Velocity (cm/s) (14)
hiPSC-CM Media Supplement - Selenium (7)	Conduction Velocity (cm/s) (14)
hiPSC-CM Media Supplement - Specialised (13)	Conduction Velocity (cm/s) (14)
hiPSC-CM Media Supplement - Transferrin (11)	Conduction Velocity (cm/s) (14)
hiPSC-CM Media Supplement - VEGF (4)	Conduction Velocity (cm/s) (14)
hiPSC-CM Media Supplement - bFGF (3)	Conduction Velocity (cm/s) (14)
hiPSC-CM Media Supplement - iCell Maintenance Medium (41)	Conduction Velocity (cm/s) (14)
2D % Confluency - 70 to 79 (5)	Force (mN) (48)
2D % Confluency - 80 to 84 (4)	Force (mN) (48)
2D Surface - Decellularized ECM (3)	Force (mN) (48)
2D Surface - Microelectrode Array (9)	Force (mN) (48)
2D Surface - Microparticle/fluid (3)	Force (mN) (48)
2D Surface - Nanotopography (6)	Force (mN) (48)
3D % Confluency - 80 to 84 (6)	Force (mN) (48)
3D % Confluency - 90 to 94 (11)	Force (mN) (48)
3D Endothelial Cell Type - CMVEC (5)	Force (mN) (48)
3D Endothelial Cell Type - HUVEC (9)	Force (mN) (48)
3D Endothelial Cell Type - hiPSC-EC (16)	Force (mN) (48)
3D Platform - Fibronectin (3)	Force (mN) (48)
3D Platform - Nanotechnology (3)	Force (mN) (48)
3D Platform - Scaffold Free (43)	Force (mN) (48)
3D Stromal Cell Type - hiPSC-CF (8)	Force (mN) (48)
3D Stromal Cell Type - hiPSC-MC (3)	Force (mN) (48)
3D Tissue Media - Cor.4U (3)	Force (mN) (48)
3D Tissue Media - EGM2 (6)	Force (mN) (48)
3D Tissue Media - Specialised (4)	Force (mN) (48)
3D Tissue Media - StemPro-34 (4)	Force (mN) (48)
3D Tissue Media - iCell Maintenance Medium (12)	Force (mN) (48)
AP Conduction Velocity (cm/s) - Q1 (7)	Force (mN) (48)
Amplitude (F/F0) - Q3 (12)	Force (mN) (48)
Beat Rate (beats per minute) - Q2 (16)	Force (mN) (48)
Beat Rate (beats per minute) - Q4 (13)	Force (mN) (48)
Calcium Handling Analysis Method - Specialised (3)	Force (mN) (48)
Differentiation Purity % - 60 to 69 (5)	Force (mN) (48)
Differentiation Purity % - <60 (9)	Force (mN) (48)
Differentiation Purity Assessment - Flow Cytometry SIRPA+ (4)	Force (mN) (48)
Differentiation Purity Assessment - Flow Cytometry VCAM1+ (4)	Force (mN) (48)
Differentiation Purity Assessment - Flow Cytometry cTnI+ (3)	Force (mN) (48)
Differentiation Purity Assessment - IHC a-actinin (8)	Force (mN) (48)
Differentiation Purity Assessment - IHC cTnT (7)	Force (mN) (48)
Differentiation Purity Assessment - Specialised (10)	Force (mN) (48)
Differentiation Purity Assessment - Visual Inspection (4)	Force (mN) (48)
Disease Modelling - Acute Myocardial Infarction (4)	Force (mN) (48)
Disease Modelling - Arrhythmogenic Cardiomyopathy (10)	Force (mN) (48)
Disease Modelling - Ischemic/Infarction (7)	Force (mN) (48)
Disease Modelling - Long QT Syndrome (3)	Force (mN) (48)
Electrophysiology Analysis Method - Motion-Contrast Reconstruction (4)	Force (mN) (48)
Force (mN) - Q1 (13)	Force (mN) (48)
Force (mN) - Q2 (12)	Force (mN) (48)
Force (mN) - Q3 (11)	Force (mN) (48)
Force (mN) - Q4 (12)	Force (mN) (48)
Force (mN) - Reported (48)	Force (mN) (48)
Force (mN) Quantiles (48)	Force (mN) (48)
Induction Conditions - Specialised (5)	Force (mN) (48)
Induction Conditions - StemCell Differentiation Kit (4)	Force (mN) (48)
Induction Conditions - Wnt3a (3)	Force (mN) (48)
Induction Duration - Reported (230)	Force (mN) (48)
Max Capture Rate (Hz) - Q2 (7)	Force (mN) (48)
Metabolic Maturation Strategy (Broad) - Amino Acids and Derivatives (5)	Force (mN) (48)
Metabolic Maturation Strategy (Broad) - Insulin and Related Components (3)	Force (mN) (48)
Metabolic Maturation Strategy (Broad) - Kinase Inhibitors (3)	Force (mN) (48)
Metabolic Maturation Strategy (Broad) - Nutrition and Supplements (6)	Force (mN) (48)
Metabolic Maturation Strategy (Broad) - Serum and Serum Replacements (3)	Force (mN) (48)
Metabolic Maturation Strategy (Broad) - Signaling Pathway Regulators (6)	Force (mN) (48)
Metabolic Maturation Strategy (Broad) - Specialised (4)	Force (mN) (48)
Metabolic Maturation Strategy (Broad) - Structural and Functional Protein (5)	Force (mN) (48)
Metabolic Maturation Strategy (Broad) - Sugar and Carbohydrates (7)	Force (mN) (48)
Metabolic Maturation Strategy (Broad) - Vitamins and Minerals (3)	Force (mN) (48)
Metabolic Maturation Strategy - Albumax (3)	Force (mN) (48)
Metabolic Maturation Strategy - Ascorbic Acid (3)	Force (mN) (48)
Metabolic Maturation Strategy - B27 (3)	Force (mN) (48)
Metabolic Maturation Strategy - Biotin (3)	Force (mN) (48)
Metabolic Maturation Strategy - Creatine (3)	Force (mN) (48)
Metabolic Maturation Strategy - Galactose (3)	Force (mN) (48)
Metabolic Maturation Strategy - Insulin-Transferrin-Selenium (3)	Force (mN) (48)
Metabolic Maturation Strategy - KOSR (3)	Force (mN) (48)
Metabolic Maturation Strategy - L-carnitine (6)	Force (mN) (48)
Metabolic Maturation Strategy - Lactate (4)	Force (mN) (48)
Metabolic Maturation Strategy - Nonessential Amino Acids (3)	Force (mN) (48)
Metabolic Maturation Strategy - Taurine (3)	Force (mN) (48)
Metabolic Maturation Strategy - Vitamin B12 (3)	Force (mN) (48)
Number of hiPSC Lines - Reported (313)	Force (mN) (48)
Pharmacological Interventions - Caffeine (4)	Force (mN) (48)
Pharmacological Interventions - Carbamylcholine (6)	Force (mN) (48)
Pharmacological Interventions - Carbenoxolone (4)	Force (mN) (48)
Pharmacological Interventions - Doxorubicin (17)	Force (mN) (48)
Pharmacological Interventions - Epinephrine (10)	Force (mN) (48)
Pharmacological Interventions - Metoprolol (5)	Force (mN) (48)
Pharmacological Interventions - Phenylephrine (3)	Force (mN) (48)
Pharmacological Interventions - Propranolol (5)	Force (mN) (48)
Pharmacological Interventions - Ranolazine (6)	Force (mN) (48)
Pharmacological Interventions - Thalidomide (3)	Force (mN) (48)
Purification Duration - 7 days (6)	Force (mN) (48)
Purification Duration - 8 days (4)	Force (mN) (48)
Purification Stategy - Cell Sorting (7)	Force (mN) (48)
Resting Membrane Potential (mV) - Q4 (9)	Force (mN) (48)
Scanning Electron Microscopy (21)	Force (mN) (48)
Time to Peak (ms) - Q1 (11)	Force (mN) (48)
Time to Relaxation (ms) - Q2 (5)	Force (mN) (48)
Wnt Inhibition Duration - 5 days (6)	Force (mN) (48)
Wnt Inhibition Duration - 6 days (4)	Force (mN) (48)
Wnt Inhibitor - BMP4 (7)	Force (mN) (48)
Wnt Inhibitor - KY02111 (7)	Force (mN) (48)
Wnt Inhibitor - Others (9)	Force (mN) (48)
Wnt Inhibitor - VEGF (3)	Force (mN) (48)
Wnt Inhibitor - bFGF (8)	Force (mN) (48)
hiPSC Backbone Media - Differentiation (1)	Force (mN) (48)
hiPSC Backbone Media - StemFit (5)	Force (mN) (48)
hiPSC Backbone Media - StemFlex (5)	Force (mN) (48)
hiPSC Line - 201B6 (3)	Force (mN) (48)
hiPSC Line - 253G1 (10)	Force (mN) (48)
hiPSC Line - Cellapy (4)	Force (mN) (48)
hiPSC Line - Gibco episomal (10)	Force (mN) (48)
hiPSC Line - Reported (310)	Force (mN) (48)
hiPSC-CM Backbone Media - Cor.4U Complete Medium (6)	Force (mN) (48)
hiPSC-CM Backbone Media - IMDM/E8/BPEL/APEL (8)	Force (mN) (48)
hiPSC-CM Backbone Media - Reported (301)	Force (mN) (48)
hiPSC-CM Maintenance/Maturation Media (if different) - Specialised (8)	Force (mN) (48)
hiPSC-CM Matrix Coating if Replated - Specialised (8)	Force (mN) (48)
hiPSC-CM Matrix Coating if Replated - Synthemax (3)	Force (mN) (48)
hiPSC-CM Media Supplement - Reported (275)	Force (mN) (48)
hiPSC-CM Media Supplement - VEGF (4)	Force (mN) (48)
hiPSC-CM Media Supplement - bFGF (3)	Force (mN) (48)
hiPSC-CM Media Supplement - iCell Maintenance Medium (41)	Force (mN) (48)
2D % Confluency - 2D/3D Values (154)	Max Capture Rate (Hz) (15)
2D % Confluency - 70 to 79 (5)	Max Capture Rate (Hz) (15)
2D % Confluency - 80 to 84 (4)	Max Capture Rate (Hz) (15)
2D % Confluency - 90 to 94 (10)	Max Capture Rate (Hz) (15)
2D % Confluency - 95 to 100 (13)	Max Capture Rate (Hz) (15)
2D % Confluency - EB (13)	Max Capture Rate (Hz) (15)
2D Surface - Decellularized ECM (3)	Max Capture Rate (Hz) (15)
2D Surface - Electrospun (13)	Max Capture Rate (Hz) (15)
2D Surface - Hydrogel (14)	Max Capture Rate (Hz) (15)
2D Surface - Microelectrode Array (9)	Max Capture Rate (Hz) (15)
2D Surface - Microparticle/fluid (3)	Max Capture Rate (Hz) (15)
2D Surface - Nanotopography (6)	Max Capture Rate (Hz) (15)
3D % Confluency - 70 to 79 (4)	Max Capture Rate (Hz) (15)
3D % Confluency - 80 to 84 (6)	Max Capture Rate (Hz) (15)
3D % Confluency - 90 to 94 (11)	Max Capture Rate (Hz) (15)
3D % Confluency - 95 to 100 (15)	Max Capture Rate (Hz) (15)
3D % Confluency - EB (31)	Max Capture Rate (Hz) (15)
3D CM % Composition - >74 (115)	Max Capture Rate (Hz) (15)
3D Endothelial Cell Type - CMVEC (5)	Max Capture Rate (Hz) (15)
3D Endothelial Cell Type - HUVEC (9)	Max Capture Rate (Hz) (15)
3D Endothelial Cell Type - Specialised (3)	Max Capture Rate (Hz) (15)
3D Estimated Tissue Cell Density (10^6 cells/mL) Q1 <2.82 (40)	Max Capture Rate (Hz) (15)
3D Estimated Tissue Size (mm2) Q1 <0.28 (34)	Max Capture Rate (Hz) (15)
3D Estimated Tissue Size (mm2) Q2 0.28 to 4 (34)	Max Capture Rate (Hz) (15)
3D Platform - 3D printed (9)	Max Capture Rate (Hz) (15)
3D Platform - Collagen (37)	Max Capture Rate (Hz) (15)
3D Platform - Decellularised (15)	Max Capture Rate (Hz) (15)
3D Platform - Fibronectin (3)	Max Capture Rate (Hz) (15)
3D Platform - Gelatin (6)	Max Capture Rate (Hz) (15)
3D Platform - Nanotechnology (3)	Max Capture Rate (Hz) (15)
3D Platform - Polyethylene Glycol (8)	Max Capture Rate (Hz) (15)
3D Platform - Reported (154)	Max Capture Rate (Hz) (15)
3D Stromal Cell Type - SMC (3)	Max Capture Rate (Hz) (15)
3D Stromal Cell Type - hMSC (12)	Max Capture Rate (Hz) (15)
3D Stromal Cell Type - hiPSC-CF (8)	Max Capture Rate (Hz) (15)
3D Tissue Media - B27 (67)	Max Capture Rate (Hz) (15)
3D Tissue Media - Cor.4U (3)	Max Capture Rate (Hz) (15)
3D Tissue Media - EGM2 (6)	Max Capture Rate (Hz) (15)
3D Tissue Media - High-glucose DMEM (7)	Max Capture Rate (Hz) (15)
3D Tissue Media - Iscove (5)	Max Capture Rate (Hz) (15)
3D Tissue Media - MEM-α (6)	Max Capture Rate (Hz) (15)
3D Tissue Media - Specialised (4)	Max Capture Rate (Hz) (15)
3D Tissue Media - StemPro-34 (4)	Max Capture Rate (Hz) (15)
3D Tissue Media - iCell Maintenance Medium (12)	Max Capture Rate (Hz) (15)
AP Amplitude (mV) - Q1 (11)	Max Capture Rate (Hz) (15)
AP Amplitude (mV) - Q2 (10)	Max Capture Rate (Hz) (15)
AP Amplitude (mV) - Q4 (10)	Max Capture Rate (Hz) (15)
AP Amplitude (mV) Quantiles (40)	Max Capture Rate (Hz) (15)
AP Conduction Velocity (cm/s) - Q1 (7)	Max Capture Rate (Hz) (15)
AP Conduction Velocity (cm/s) - Q2 (8)	Max Capture Rate (Hz) (15)
AP Conduction Velocity (cm/s) - Q4 (7)	Max Capture Rate (Hz) (15)
Amplitude (F/F0) - Q3 (12)	Max Capture Rate (Hz) (15)
Amplitude (F/F0) - Q4 (12)	Max Capture Rate (Hz) (15)
Amplitude (F/F0) Quantiles (50)	Max Capture Rate (Hz) (15)
Beat Rate (beats per minute) - Q1 (15)	Max Capture Rate (Hz) (15)
Beat Rate (beats per minute) - Q3 (10)	Max Capture Rate (Hz) (15)
Beat Rate (beats per minute) - Q4 (13)	Max Capture Rate (Hz) (15)
Calcium Handling Analysis Method - Dye (99)	Max Capture Rate (Hz) (15)
Calcium Handling Analysis Method - Specialised (3)	Max Capture Rate (Hz) (15)
Conduction Velocity (cm/s) - Q1 (7)	Max Capture Rate (Hz) (15)
Conduction Velocity (cm/s) - Q2 (7)	Max Capture Rate (Hz) (15)
Conduction Velocity (cm/s) Quantiles (14)	Max Capture Rate (Hz) (15)
Contractile Analysis Method - Specialised (6)	Max Capture Rate (Hz) (15)
Contractile Analysis Method - TFM (8)	Max Capture Rate (Hz) (15)
Differentiation Purity % - 80 to 84 (25)	Max Capture Rate (Hz) (15)
Differentiation Purity % - 95 to 100 (35)	Max Capture Rate (Hz) (15)
Differentiation Purity Assessment - Flow Cytometry SIRPA+ (4)	Max Capture Rate (Hz) (15)
Differentiation Purity Assessment - Flow Cytometry a-actinin+ (9)	Max Capture Rate (Hz) (15)
Differentiation Purity Assessment - IHC a-actinin (8)	Max Capture Rate (Hz) (15)
Differentiation Purity Assessment - IHC cTnT (7)	Max Capture Rate (Hz) (15)
Differentiation Purity Assessment - Reported (167)	Max Capture Rate (Hz) (15)
Differentiation Purity Assessment - Specialised (10)	Max Capture Rate (Hz) (15)
Differentiation Purity Assessment - Visual Inspection (4)	Max Capture Rate (Hz) (15)
Disease Modelling - Acute Myocardial Infarction (4)	Max Capture Rate (Hz) (15)
Disease Modelling - Arrhythmic (15)	Max Capture Rate (Hz) (15)
Disease Modelling - Arrhythmogenic Cardiomyopathy (10)	Max Capture Rate (Hz) (15)
Disease Modelling - DCM (5)	Max Capture Rate (Hz) (15)
Disease Modelling - Fibrotic (3)	Max Capture Rate (Hz) (15)
Disease Modelling - Genetic Disorders (23)	Max Capture Rate (Hz) (15)
Disease Modelling - HCM (6)	Max Capture Rate (Hz) (15)
Disease Modelling - Ischemic/Infarction (7)	Max Capture Rate (Hz) (15)
Disease Modelling - Left Ventricular (15)	Max Capture Rate (Hz) (15)
Disease Modelling - Long QT Syndrome (3)	Max Capture Rate (Hz) (15)
Disease Modelling - Metabolic Disorders (4)	Max Capture Rate (Hz) (15)
Disease Modelling - Myocardium (11)	Max Capture Rate (Hz) (15)
Disease Modelling - Specialised (3)	Max Capture Rate (Hz) (15)
Elastomeric Maturation (33)	Max Capture Rate (Hz) (15)
Electrophysiology Analysis Method - Genetical (3)	Max Capture Rate (Hz) (15)
Electrophysiology Analysis Method - Reported (117)	Max Capture Rate (Hz) (15)
Extracellular Matrix Maturation (18)	Max Capture Rate (Hz) (15)
Force (mN) - Q2 (12)	Max Capture Rate (Hz) (15)
Force (mN) - Q3 (11)	Max Capture Rate (Hz) (15)
Force (mN) - Q4 (12)	Max Capture Rate (Hz) (15)
Force (mN) - Reported (48)	Max Capture Rate (Hz) (15)
Gene Analysis Method - Specialised (6)	Max Capture Rate (Hz) (15)
Induction Conditions - Reported (238)	Max Capture Rate (Hz) (15)
Induction Conditions - Specialised (5)	Max Capture Rate (Hz) (15)
Induction Conditions - StemCell Differentiation Kit (4)	Max Capture Rate (Hz) (15)
Induction Conditions - bFGF (45)	Max Capture Rate (Hz) (15)
Induction Duration - 3 days (37)	Max Capture Rate (Hz) (15)
Max Capture Rate (Hz) - Q1 (8)	Max Capture Rate (Hz) (15)
Max Capture Rate (Hz) - Q2 (7)	Max Capture Rate (Hz) (15)
Max Capture Rate (Hz) - Reported (15)	Max Capture Rate (Hz) (15)
Max Capture Rate (Hz) Quantiles (15)	Max Capture Rate (Hz) (15)
Measured Fatty Acid Metabolism (18)	Max Capture Rate (Hz) (15)
Metabolic Analysis Method - Mitochondrial (4)	Max Capture Rate (Hz) (15)
Metabolic Analysis Method - Reported (45)	Max Capture Rate (Hz) (15)
Metabolic Analysis Method - Seahorse (35)	Max Capture Rate (Hz) (15)
Metabolic Analysis Method - Specialised (8)	Max Capture Rate (Hz) (15)
Metabolic Maturation Strategy (Broad) - Amino Acids and Derivatives (5)	Max Capture Rate (Hz) (15)
Metabolic Maturation Strategy (Broad) - Fatty Acid and Lipids (19)	Max Capture Rate (Hz) (15)
Metabolic Maturation Strategy (Broad) - Glucocorticoids (7)	Max Capture Rate (Hz) (15)
Metabolic Maturation Strategy (Broad) - Insulin and Related Components (3)	Max Capture Rate (Hz) (15)
Metabolic Maturation Strategy (Broad) - Kinase Inhibitors (3)	Max Capture Rate (Hz) (15)
Metabolic Maturation Strategy (Broad) - Known (30)	Max Capture Rate (Hz) (15)
Metabolic Maturation Strategy (Broad) - Metabolic Modulation (19)	Max Capture Rate (Hz) (15)
Metabolic Maturation Strategy (Broad) - Nutrition and Supplements (6)	Max Capture Rate (Hz) (15)
Metabolic Maturation Strategy (Broad) - Serum and Serum Replacements (3)	Max Capture Rate (Hz) (15)
Metabolic Maturation Strategy (Broad) - Signaling Pathway Regulators (6)	Max Capture Rate (Hz) (15)
Metabolic Maturation Strategy (Broad) - Specialised (4)	Max Capture Rate (Hz) (15)
Metabolic Maturation Strategy (Broad) - Structural and Functional Protein (5)	Max Capture Rate (Hz) (15)
Metabolic Maturation Strategy (Broad) - Sugar and Carbohydrates (7)	Max Capture Rate (Hz) (15)
Metabolic Maturation Strategy (Broad) - Vitamins and Minerals (3)	Max Capture Rate (Hz) (15)
Metabolic Maturation Strategy - Albumax (3)	Max Capture Rate (Hz) (15)
Metabolic Maturation Strategy - Ascorbic Acid (3)	Max Capture Rate (Hz) (15)
Metabolic Maturation Strategy - B27 (3)	Max Capture Rate (Hz) (15)
Metabolic Maturation Strategy - Biotin (3)	Max Capture Rate (Hz) (15)
Metabolic Maturation Strategy - Creatine (3)	Max Capture Rate (Hz) (15)
Metabolic Maturation Strategy - Galactose (3)	Max Capture Rate (Hz) (15)
Metabolic Maturation Strategy - IGF-1 (3)	Max Capture Rate (Hz) (15)
Metabolic Maturation Strategy - Insulin-Transferrin-Selenium (3)	Max Capture Rate (Hz) (15)
Metabolic Maturation Strategy - KOSR (3)	Max Capture Rate (Hz) (15)
Metabolic Maturation Strategy - L-carnitine (6)	Max Capture Rate (Hz) (15)
Metabolic Maturation Strategy - Lactate (4)	Max Capture Rate (Hz) (15)
Metabolic Maturation Strategy - Linoleic/Oleic Acid (4)	Max Capture Rate (Hz) (15)
Metabolic Maturation Strategy - Nonessential Amino Acids (3)	Max Capture Rate (Hz) (15)
Metabolic Maturation Strategy - Palmitic Acid (10)	Max Capture Rate (Hz) (15)
Metabolic Maturation Strategy - Specialised (9)	Max Capture Rate (Hz) (15)
Metabolic Maturation Strategy - Taurine (3)	Max Capture Rate (Hz) (15)
Metabolic Maturation Strategy - Vitamin B12 (3)	Max Capture Rate (Hz) (15)
Number of hiPSC Lines - 3 (27)	Max Capture Rate (Hz) (15)
Number of hiPSC Lines - 4 (10)	Max Capture Rate (Hz) (15)
Number of hiPSC Lines - >5 (8)	Max Capture Rate (Hz) (15)
Number of hiPSC Lines - Reported (313)	Max Capture Rate (Hz) (15)
Pharmacological Interventions - Blebbistatin (5)	Max Capture Rate (Hz) (15)
Pharmacological Interventions - Caffeine (4)	Max Capture Rate (Hz) (15)
Pharmacological Interventions - Carbamylcholine (6)	Max Capture Rate (Hz) (15)
Pharmacological Interventions - Carbenoxolone (4)	Max Capture Rate (Hz) (15)
Pharmacological Interventions - Cisapride (5)	Max Capture Rate (Hz) (15)
Pharmacological Interventions - E4031 (22)	Max Capture Rate (Hz) (15)
Pharmacological Interventions - Epinephrine (10)	Max Capture Rate (Hz) (15)
Pharmacological Interventions - Lidocaine (7)	Max Capture Rate (Hz) (15)
Pharmacological Interventions - Metoprolol (5)	Max Capture Rate (Hz) (15)
Pharmacological Interventions - Phenylephrine (3)	Max Capture Rate (Hz) (15)
Pharmacological Interventions - Propranolol (5)	Max Capture Rate (Hz) (15)
Pharmacological Interventions - Ranolazine (6)	Max Capture Rate (Hz) (15)
Pharmacological Interventions - Specialised (16)	Max Capture Rate (Hz) (15)
Pharmacological Interventions - T3 (3)	Max Capture Rate (Hz) (15)
Pharmacological Interventions - Thalidomide (3)	Max Capture Rate (Hz) (15)
Pharmacological Interventions - Verapamil (27)	Max Capture Rate (Hz) (15)
Purification Duration - 4 days (28)	Max Capture Rate (Hz) (15)
Purification Duration - 5 days (6)	Max Capture Rate (Hz) (15)
Purification Duration - 6 days (10)	Max Capture Rate (Hz) (15)
Purification Duration - 7 days (6)	Max Capture Rate (Hz) (15)
Purification Duration - 8 days (4)	Max Capture Rate (Hz) (15)
Purification Duration - <3 days (17)	Max Capture Rate (Hz) (15)
Purification Duration - >9 days (5)	Max Capture Rate (Hz) (15)
Purification Stategy - Antibiotic (3)	Max Capture Rate (Hz) (15)
Purification Stategy - Cell Sorting (7)	Max Capture Rate (Hz) (15)
Purification Stategy - Media (6)	Max Capture Rate (Hz) (15)
Resting Membrane Potential (mV) - Q1 (11)	Max Capture Rate (Hz) (15)
Resting Membrane Potential (mV) - Q2 (13)	Max Capture Rate (Hz) (15)
Resting Membrane Potential (mV) - Q3 (11)	Max Capture Rate (Hz) (15)
Sarcomere Length (um) - Mature Q2 1.7 to 1.9 (28)	Max Capture Rate (Hz) (15)
Sarcomere Length (um) Q1 <1.7 (19)	Max Capture Rate (Hz) (15)
Sarcomere Length (um) Q3 >1.9 (17)	Max Capture Rate (Hz) (15)
Scanning Electron Microscopy (21)	Max Capture Rate (Hz) (15)
Sex of hiPSC Lines - Both (10)	Max Capture Rate (Hz) (15)
Stress (mN/mm2) - Q4 (9)	Max Capture Rate (Hz) (15)
Time to Peak (ms) - Q1 (11)	Max Capture Rate (Hz) (15)
Time to Peak (ms) - Q3 (10)	Max Capture Rate (Hz) (15)
Time to Peak (ms) - Q4 (10)	Max Capture Rate (Hz) (15)
Time to Peak (ms) - Reported (41)	Max Capture Rate (Hz) (15)
Time to Relaxation (ms) - Q1 (5)	Max Capture Rate (Hz) (15)
Time to Relaxation (ms) - Q2 (5)	Max Capture Rate (Hz) (15)
Time to Relaxation (ms) - Reported (10)	Max Capture Rate (Hz) (15)
Time to Relaxation (ms) Quantiles (10)	Max Capture Rate (Hz) (15)
Upstroke Velocity (um/s) - Q1 (10)	Max Capture Rate (Hz) (15)
Upstroke Velocity (um/s) - Q3 (11)	Max Capture Rate (Hz) (15)
Wnt Inhibition Duration - 1 day (12)	Max Capture Rate (Hz) (15)
Wnt Inhibition Duration - 4 days (19)	Max Capture Rate (Hz) (15)
Wnt Inhibition Duration - 5 days (6)	Max Capture Rate (Hz) (15)
Wnt Inhibition Duration - 6 days (4)	Max Capture Rate (Hz) (15)
Wnt Inhibition Duration - >6 days (12)	Max Capture Rate (Hz) (15)
Wnt Inhibitor - BMP4 (7)	Max Capture Rate (Hz) (15)
Wnt Inhibitor - KY02111 (7)	Max Capture Rate (Hz) (15)
Wnt Inhibitor - Others (9)	Max Capture Rate (Hz) (15)
Wnt Inhibitor - Wnt-C59 (28)	Max Capture Rate (Hz) (15)
Wnt Inhibitor - XAV939 (23)	Max Capture Rate (Hz) (15)
Wnt Inhibitor - bFGF (8)	Max Capture Rate (Hz) (15)
hiPSC Backbone Media - DMEM (10)	Max Capture Rate (Hz) (15)
hiPSC Backbone Media - Differentiation (1)	Max Capture Rate (Hz) (15)
hiPSC Backbone Media - Embryonic Stem Cell (20)	Max Capture Rate (Hz) (15)
hiPSC Backbone Media - Specialised (17)	Max Capture Rate (Hz) (15)
hiPSC Backbone Media - StemFit (5)	Max Capture Rate (Hz) (15)
hiPSC Backbone Media - StemFlex (5)	Max Capture Rate (Hz) (15)
hiPSC Line - 201B7 (9)	Max Capture Rate (Hz) (15)
hiPSC Line - 253G1 (10)	Max Capture Rate (Hz) (15)
hiPSC Line - ATCC (5)	Max Capture Rate (Hz) (15)
hiPSC Line - BJ RiPS (4)	Max Capture Rate (Hz) (15)
hiPSC Line - C25 (6)	Max Capture Rate (Hz) (15)
hiPSC Line - Cellapy (4)	Max Capture Rate (Hz) (15)
hiPSC Line - DF19-9-11T.H (16)	Max Capture Rate (Hz) (15)
hiPSC Line - IMR90 (19)	Max Capture Rate (Hz) (15)
hiPSC Line - PGP1 (11)	Max Capture Rate (Hz) (15)
hiPSC Line - Reported (310)	Max Capture Rate (Hz) (15)
hiPSC Line - SCVI-273 (8)	Max Capture Rate (Hz) (15)
hiPSC Line - iCell (46)	Max Capture Rate (Hz) (15)
hiPSC Line - iCell2 (8)	Max Capture Rate (Hz) (15)
hiPSC-CM Backbone Media - Commercial Cardiomyocyte Kit (12)	Max Capture Rate (Hz) (15)
hiPSC-CM Backbone Media - Cor.4U Complete Medium (6)	Max Capture Rate (Hz) (15)
hiPSC-CM Backbone Media - DMEM (18)	Max Capture Rate (Hz) (15)
hiPSC-CM Backbone Media - IMDM/E8/BPEL/APEL (8)	Max Capture Rate (Hz) (15)
hiPSC-CM Maintenance/Maturation Media (if different) - DMEM (11)	Max Capture Rate (Hz) (15)
hiPSC-CM Maintenance/Maturation Media (if different) - DMEM/F12 (6)	Max Capture Rate (Hz) (15)
hiPSC-CM Maintenance/Maturation Media (if different) - Modified Essential Medium (1)	Max Capture Rate (Hz) (15)
hiPSC-CM Maintenance/Maturation Media (if different) - Specialised (8)	Max Capture Rate (Hz) (15)
hiPSC-CM Matrix Coating if Replated - Fibronectin (32)	Max Capture Rate (Hz) (15)
hiPSC-CM Matrix Coating if Replated - Gelatin (43)	Max Capture Rate (Hz) (15)
hiPSC-CM Matrix Coating if Replated - Geltrex (10)	Max Capture Rate (Hz) (15)
hiPSC-CM Matrix Coating if Replated - Laminin (5)	Max Capture Rate (Hz) (15)
hiPSC-CM Matrix Coating if Replated - Specialised (8)	Max Capture Rate (Hz) (15)
hiPSC-CM Matrix Coating if Replated - Synthemax (3)	Max Capture Rate (Hz) (15)
hiPSC-CM Media Supplement - Albumin (23)	Max Capture Rate (Hz) (15)
hiPSC-CM Media Supplement - Essential Lipids (6)	Max Capture Rate (Hz) (15)
hiPSC-CM Media Supplement - FBS (16)	Max Capture Rate (Hz) (15)
hiPSC-CM Media Supplement - GlutaMax (8)	Max Capture Rate (Hz) (15)
hiPSC-CM Media Supplement - HEPES (16)	Max Capture Rate (Hz) (15)
hiPSC-CM Media Supplement - Lipid Mix (5)	Max Capture Rate (Hz) (15)
hiPSC-CM Media Supplement - Polyvinylalchohol (6)	Max Capture Rate (Hz) (15)
hiPSC-CM Media Supplement - Selenium (7)	Max Capture Rate (Hz) (15)
hiPSC-CM Media Supplement - Specialised (13)	Max Capture Rate (Hz) (15)
hiPSC-CM Media Supplement - Transferrin (11)	Max Capture Rate (Hz) (15)
hiPSC-CM Media Supplement - VEGF (4)	Max Capture Rate (Hz) (15)
hiPSC-CM Media Supplement - bFGF (3)	Max Capture Rate (Hz) (15)
hiPSC-CM Media Supplement - iCell Maintenance Medium (41)	Max Capture Rate (Hz) (15)
2D % Confluency - 90 to 94 (10)	Resting Membrane Potential (mV) (44)
2D Surface - Decellularized ECM (3)	Resting Membrane Potential (mV) (44)
2D Surface - Microparticle/fluid (3)	Resting Membrane Potential (mV) (44)
3D % Confluency - 90 to 94 (11)	Resting Membrane Potential (mV) (44)
3D Endothelial Cell Type - HUVEC (9)	Resting Membrane Potential (mV) (44)
3D Endothelial Cell Type - Specialised (3)	Resting Membrane Potential (mV) (44)
3D Platform - 3D printed (9)	Resting Membrane Potential (mV) (44)
3D Platform - Decellularised (15)	Resting Membrane Potential (mV) (44)
3D Platform - Fibronectin (3)	Resting Membrane Potential (mV) (44)
3D Platform - Gelatin (6)	Resting Membrane Potential (mV) (44)
3D Platform - Nanotechnology (3)	Resting Membrane Potential (mV) (44)
3D Platform - Polyethylene Glycol (8)	Resting Membrane Potential (mV) (44)
3D Stromal Cell Type - SMC (3)	Resting Membrane Potential (mV) (44)
3D Stromal Cell Type - hFF (6)	Resting Membrane Potential (mV) (44)
3D Stromal Cell Type - hMSC (12)	Resting Membrane Potential (mV) (44)
3D Tissue Media - Cor.4U (3)	Resting Membrane Potential (mV) (44)
3D Tissue Media - EGM2 (6)	Resting Membrane Potential (mV) (44)
3D Tissue Media - High-glucose DMEM (7)	Resting Membrane Potential (mV) (44)
3D Tissue Media - Specialised (4)	Resting Membrane Potential (mV) (44)
Beat Rate (beats per minute) - Q3 (10)	Resting Membrane Potential (mV) (44)
Calcium Handling Analysis Method - Specialised (3)	Resting Membrane Potential (mV) (44)
Contractile Analysis Method - Specialised (6)	Resting Membrane Potential (mV) (44)
Differentiation Purity % - 60 to 69 (5)	Resting Membrane Potential (mV) (44)
Differentiation Purity Assessment - Flow Cytometry cTnI+ (3)	Resting Membrane Potential (mV) (44)
Differentiation Purity Assessment - IHC cTnT (7)	Resting Membrane Potential (mV) (44)
Differentiation Purity Assessment - Specialised (10)	Resting Membrane Potential (mV) (44)
Differentiation Purity Assessment - Visual Inspection (4)	Resting Membrane Potential (mV) (44)
Disease Modelling - Acute Myocardial Infarction (4)	Resting Membrane Potential (mV) (44)
Disease Modelling - DCM (5)	Resting Membrane Potential (mV) (44)
Disease Modelling - Ischemic/Infarction (7)	Resting Membrane Potential (mV) (44)
Disease Modelling - Metabolic Disorders (4)	Resting Membrane Potential (mV) (44)
Disease Modelling - Specialised (3)	Resting Membrane Potential (mV) (44)
Electrophysiology Analysis Method - Genetical (3)	Resting Membrane Potential (mV) (44)
Electrophysiology Analysis Method - Motion-Contrast Reconstruction (4)	Resting Membrane Potential (mV) (44)
Electrophysiology Analysis Method - Reported (117)	Resting Membrane Potential (mV) (44)
Induction Conditions - Specialised (5)	Resting Membrane Potential (mV) (44)
Induction Conditions - StemCell Differentiation Kit (4)	Resting Membrane Potential (mV) (44)
Induction Duration - 4 days (15)	Resting Membrane Potential (mV) (44)
Max Capture Rate (Hz) - Q1 (8)	Resting Membrane Potential (mV) (44)
Metabolic Analysis Method - Mitochondrial (4)	Resting Membrane Potential (mV) (44)
Metabolic Maturation Strategy (Broad) - Growth Factors (4)	Resting Membrane Potential (mV) (44)
Metabolic Maturation Strategy (Broad) - Insulin and Related Components (3)	Resting Membrane Potential (mV) (44)
Metabolic Maturation Strategy - Creatine (3)	Resting Membrane Potential (mV) (44)
Metabolic Maturation Strategy - Galactose (3)	Resting Membrane Potential (mV) (44)
Metabolic Maturation Strategy - IGF-1 (3)	Resting Membrane Potential (mV) (44)
Metabolic Maturation Strategy - Insulin-Transferrin-Selenium (3)	Resting Membrane Potential (mV) (44)
Metabolic Maturation Strategy - KOSR (3)	Resting Membrane Potential (mV) (44)
Metabolic Maturation Strategy - L-carnitine (6)	Resting Membrane Potential (mV) (44)
Metabolic Maturation Strategy - Vitamin B12 (3)	Resting Membrane Potential (mV) (44)
Number of hiPSC Lines - Reported (313)	Resting Membrane Potential (mV) (44)
Pharmacological Interventions - Blebbistatin (5)	Resting Membrane Potential (mV) (44)
Pharmacological Interventions - Doxorubicin (17)	Resting Membrane Potential (mV) (44)
Pharmacological Interventions - Epinephrine (10)	Resting Membrane Potential (mV) (44)
Pharmacological Interventions - Phenylephrine (3)	Resting Membrane Potential (mV) (44)
Pharmacological Interventions - Propranolol (5)	Resting Membrane Potential (mV) (44)
Pharmacological Interventions - T3 (3)	Resting Membrane Potential (mV) (44)
Pharmacological Interventions - Thalidomide (3)	Resting Membrane Potential (mV) (44)
Purification Duration - 5 days (6)	Resting Membrane Potential (mV) (44)
Purification Duration - 7 days (6)	Resting Membrane Potential (mV) (44)
Purification Duration - >9 days (5)	Resting Membrane Potential (mV) (44)
Purification Stategy - Antibiotic (3)	Resting Membrane Potential (mV) (44)
Resting Membrane Potential (mV) - Q1 (11)	Resting Membrane Potential (mV) (44)
Resting Membrane Potential (mV) - Q2 (13)	Resting Membrane Potential (mV) (44)
Resting Membrane Potential (mV) - Q3 (11)	Resting Membrane Potential (mV) (44)
Resting Membrane Potential (mV) - Q4 (9)	Resting Membrane Potential (mV) (44)
Resting Membrane Potential (mV) - Reported (44)	Resting Membrane Potential (mV) (44)
Resting Membrane Potential (mV) Quantiles (44)	Resting Membrane Potential (mV) (44)
Stress (mN/mm2) - Q1 (10)	Resting Membrane Potential (mV) (44)
Stress (mN/mm2) - Q3 (9)	Resting Membrane Potential (mV) (44)
Upstroke Velocity (um/s) - Q2 (10)	Resting Membrane Potential (mV) (44)
Wnt Inhibition Duration - 6 days (4)	Resting Membrane Potential (mV) (44)
Wnt Inhibitor - BMP4 (7)	Resting Membrane Potential (mV) (44)
hiPSC Backbone Media - Differentiation (1)	Resting Membrane Potential (mV) (44)
hiPSC Backbone Media - StemFit (5)	Resting Membrane Potential (mV) (44)
hiPSC Line - 201B7 (9)	Resting Membrane Potential (mV) (44)
hiPSC Line - ATCC (5)	Resting Membrane Potential (mV) (44)
hiPSC Line - Cellapy (4)	Resting Membrane Potential (mV) (44)
hiPSC Line - Gibco episomal (10)	Resting Membrane Potential (mV) (44)
hiPSC Line - PGP1 (11)	Resting Membrane Potential (mV) (44)
hiPSC Line - Reported (310)	Resting Membrane Potential (mV) (44)
hiPSC-CM Backbone Media - Cor.4U Complete Medium (6)	Resting Membrane Potential (mV) (44)
hiPSC-CM Media Supplement - Mercaptoethanol (10)	Resting Membrane Potential (mV) (44)
hiPSC-CM Media Supplement - Nonessential Amino Acids (7)	Resting Membrane Potential (mV) (44)
hiPSC-CM Media Supplement - VEGF (4)	Resting Membrane Potential (mV) (44)
hiPSC-CM Media Supplement - bFGF (3)	Resting Membrane Potential (mV) (44)
2D Surface - Microelectrode Array (9)	Sarcomere Length (um) (64)
2D Surface - Microparticle/fluid (3)	Sarcomere Length (um) (64)
3D % Confluency - EB (31)	Sarcomere Length (um) (64)
3D Endothelial Cell Type - CMVEC (5)	Sarcomere Length (um) (64)
3D Endothelial Cell Type - Specialised (3)	Sarcomere Length (um) (64)
3D Platform - 3D printed (9)	Sarcomere Length (um) (64)
3D Platform - Fibronectin (3)	Sarcomere Length (um) (64)
3D Platform - Gelatin (6)	Sarcomere Length (um) (64)
3D Platform - Nanotechnology (3)	Sarcomere Length (um) (64)
3D Stromal Cell Type - SMC (3)	Sarcomere Length (um) (64)
3D Stromal Cell Type - hFF (6)	Sarcomere Length (um) (64)
3D Stromal Cell Type - hiPSC-MC (3)	Sarcomere Length (um) (64)
3D Tissue Media - Cor.4U (3)	Sarcomere Length (um) (64)
3D Tissue Media - High-glucose DMEM (7)	Sarcomere Length (um) (64)
3D Tissue Media - Iscove (5)	Sarcomere Length (um) (64)
3D Tissue Media - Specialised (4)	Sarcomere Length (um) (64)
3D Tissue Media - StemPro-34 (4)	Sarcomere Length (um) (64)
Differentiation Purity % - 75 to 79 (8)	Sarcomere Length (um) (64)
Differentiation Purity % - <60 (9)	Sarcomere Length (um) (64)
Differentiation Purity Assessment - Flow Cytometry cTnI+ (3)	Sarcomere Length (um) (64)
Differentiation Purity Assessment - Specialised (10)	Sarcomere Length (um) (64)
Differentiation Purity Assessment - Visual Inspection (4)	Sarcomere Length (um) (64)
Disease Modelling - Acute Myocardial Infarction (4)	Sarcomere Length (um) (64)
Disease Modelling - Fibrotic (3)	Sarcomere Length (um) (64)
Disease Modelling - Ischemic/Infarction (7)	Sarcomere Length (um) (64)
Disease Modelling - Myocardium (11)	Sarcomere Length (um) (64)
Disease Modelling - Specialised (3)	Sarcomere Length (um) (64)
Electrophysiology Analysis Method - Genetical (3)	Sarcomere Length (um) (64)
Electrophysiology Analysis Method - Motion-Contrast Reconstruction (4)	Sarcomere Length (um) (64)
Force (mN) - Q4 (12)	Sarcomere Length (um) (64)
Gene Analysis Method - Specialised (6)	Sarcomere Length (um) (64)
Induction Conditions - StemCell Differentiation Kit (4)	Sarcomere Length (um) (64)
Induction Conditions - Wnt3a (3)	Sarcomere Length (um) (64)
Induction Duration - 4 days (15)	Sarcomere Length (um) (64)
Max Capture Rate (Hz) - Q1 (8)	Sarcomere Length (um) (64)
Metabolic Analysis Method - Mitochondrial (4)	Sarcomere Length (um) (64)
Metabolic Maturation Strategy (Broad) - Amino Acids and Derivatives (5)	Sarcomere Length (um) (64)
Metabolic Maturation Strategy - Albumax (3)	Sarcomere Length (um) (64)
Metabolic Maturation Strategy - B27 (3)	Sarcomere Length (um) (64)
Metabolic Maturation Strategy - KOSR (3)	Sarcomere Length (um) (64)
Metabolic Maturation Strategy - L-carnitine (6)	Sarcomere Length (um) (64)
Metabolic Maturation Strategy - Taurine (3)	Sarcomere Length (um) (64)
Number of hiPSC Lines - Reported (313)	Sarcomere Length (um) (64)
Pharmacological Interventions - Lidocaine (7)	Sarcomere Length (um) (64)
Pharmacological Interventions - Metoprolol (5)	Sarcomere Length (um) (64)
Pharmacological Interventions - Ranolazine (6)	Sarcomere Length (um) (64)
Pharmacological Interventions - Thalidomide (3)	Sarcomere Length (um) (64)
Purification Duration - 7 days (6)	Sarcomere Length (um) (64)
Purification Stategy - Antibiotic (3)	Sarcomere Length (um) (64)
Sarcomere Length (um) - Mature Q2 1.7 to 1.9 (28)	Sarcomere Length (um) (64)
Sarcomere Length (um) Q1 <1.7 (19)	Sarcomere Length (um) (64)
Sarcomere Length (um) Q3 >1.9 (17)	Sarcomere Length (um) (64)
Sarcomere Length (um) Quantiles (64)	Sarcomere Length (um) (64)
Stress (mN/mm2) - Q1 (10)	Sarcomere Length (um) (64)
Wnt Inhibition Duration - 1 day (12)	Sarcomere Length (um) (64)
Wnt Inhibition Duration - 4 days (19)	Sarcomere Length (um) (64)
Wnt Inhibition Duration - 6 days (4)	Sarcomere Length (um) (64)
Wnt Inhibitor - BMP4 (7)	Sarcomere Length (um) (64)
Wnt Inhibitor - KY02111 (7)	Sarcomere Length (um) (64)
Wnt Inhibitor - bFGF (8)	Sarcomere Length (um) (64)
hiPSC Backbone Media - StemFit (5)	Sarcomere Length (um) (64)
hiPSC Line - 201B6 (3)	Sarcomere Length (um) (64)
hiPSC Line - 201B7 (9)	Sarcomere Length (um) (64)
hiPSC Line - ATCC (5)	Sarcomere Length (um) (64)
hiPSC Line - C25 (6)	Sarcomere Length (um) (64)
hiPSC Line - Reported (310)	Sarcomere Length (um) (64)
hiPSC-CM Matrix Coating if Replated - Synthemax (3)	Sarcomere Length (um) (64)
hiPSC-CM Media Supplement - Mercaptoethanol (10)	Sarcomere Length (um) (64)
hiPSC-CM Media Supplement - Nonessential Amino Acids (7)	Sarcomere Length (um) (64)
hiPSC-CM Media Supplement - Selenium (7)	Sarcomere Length (um) (64)
hiPSC-CM Media Supplement - Transferrin (11)	Sarcomere Length (um) (64)
hiPSC-CM Media Supplement - bFGF (3)	Sarcomere Length (um) (64)
2D % Confluency - 70 to 79 (5)	Stress (mN/mm2) (37)
2D % Confluency - 80 to 84 (4)	Stress (mN/mm2) (37)
2D % Confluency - 95 to 100 (13)	Stress (mN/mm2) (37)
2D % Confluency - EB (13)	Stress (mN/mm2) (37)
2D Surface - Decellularized ECM (3)	Stress (mN/mm2) (37)
2D Surface - Electrospun (13)	Stress (mN/mm2) (37)
2D Surface - Microelectrode Array (9)	Stress (mN/mm2) (37)
2D Surface - Microparticle/fluid (3)	Stress (mN/mm2) (37)
2D Surface - Nanotopography (6)	Stress (mN/mm2) (37)
3D % Confluency - 70 to 79 (4)	Stress (mN/mm2) (37)
3D % Confluency - 80 to 84 (6)	Stress (mN/mm2) (37)
3D % Confluency - 85 to 89 (12)	Stress (mN/mm2) (37)
3D % Confluency - 95 to 100 (15)	Stress (mN/mm2) (37)
3D % Confluency - EB (31)	Stress (mN/mm2) (37)
3D Endothelial Cell Type - CMVEC (5)	Stress (mN/mm2) (37)
3D Endothelial Cell Type - Specialised (3)	Stress (mN/mm2) (37)
3D Platform - 3D printed (9)	Stress (mN/mm2) (37)
3D Platform - Fibronectin (3)	Stress (mN/mm2) (37)
3D Platform - Nanotechnology (3)	Stress (mN/mm2) (37)
3D Platform - Polyethylene Glycol (8)	Stress (mN/mm2) (37)
3D Tissue Media - EGM2 (6)	Stress (mN/mm2) (37)
3D Tissue Media - Iscove (5)	Stress (mN/mm2) (37)
3D Tissue Media - Specialised (4)	Stress (mN/mm2) (37)
3D Tissue Media - iCell Maintenance Medium (12)	Stress (mN/mm2) (37)
AP Amplitude (mV) - Q3 (9)	Stress (mN/mm2) (37)
AP Amplitude (mV) - Q4 (10)	Stress (mN/mm2) (37)
AP Conduction Velocity (cm/s) - Q1 (7)	Stress (mN/mm2) (37)
AP Conduction Velocity (cm/s) - Q2 (8)	Stress (mN/mm2) (37)
Amplitude (F/F0) - Q3 (12)	Stress (mN/mm2) (37)
Amplitude (F/F0) - Q4 (12)	Stress (mN/mm2) (37)
Beat Rate (beats per minute) - Q3 (10)	Stress (mN/mm2) (37)
Calcium Handling Analysis Method - Specialised (3)	Stress (mN/mm2) (37)
Contractile Analysis Method - Reported(163)	Stress (mN/mm2) (37)
Contractile Analysis Method - Specialised (6)	Stress (mN/mm2) (37)
Differentiation Purity Assessment - Flow Cytometry SIRPA+ (4)	Stress (mN/mm2) (37)
Differentiation Purity Assessment - Flow Cytometry VCAM1+ (4)	Stress (mN/mm2) (37)
Differentiation Purity Assessment - Flow Cytometry cTnI+ (3)	Stress (mN/mm2) (37)
Differentiation Purity Assessment - IHC cTnT (7)	Stress (mN/mm2) (37)
Differentiation Purity Assessment - Specialised (10)	Stress (mN/mm2) (37)
Disease Modelling - Acute Myocardial Infarction (4)	Stress (mN/mm2) (37)
Disease Modelling - Ischemic/Infarction (7)	Stress (mN/mm2) (37)
Disease Modelling - Long QT Syndrome (3)	Stress (mN/mm2) (37)
Disease Modelling - Metabolic Disorders (4)	Stress (mN/mm2) (37)
Disease Modelling - Specialised (3)	Stress (mN/mm2) (37)
Electrophysiology Analysis Method - Microelectrode (29)	Stress (mN/mm2) (37)
Electrophysiology Analysis Method - Patch Clamp (55)	Stress (mN/mm2) (37)
Induction Conditions - StemCell Differentiation Kit (4)	Stress (mN/mm2) (37)
Metabolic Analysis Method - Mitochondrial (4)	Stress (mN/mm2) (37)
Metabolic Maturation Strategy (Broad) - Insulin and Related Components (3)	Stress (mN/mm2) (37)
Metabolic Maturation Strategy (Broad) - Kinase Inhibitors (3)	Stress (mN/mm2) (37)
Metabolic Maturation Strategy (Broad) - Nutrition and Supplements (6)	Stress (mN/mm2) (37)
Metabolic Maturation Strategy (Broad) - Serum and Serum Replacements (3)	Stress (mN/mm2) (37)
Metabolic Maturation Strategy (Broad) - Signaling Pathway Regulators (6)	Stress (mN/mm2) (37)
Metabolic Maturation Strategy (Broad) - Specialised (4)	Stress (mN/mm2) (37)
Metabolic Maturation Strategy (Broad) - Structural and Functional Protein (5)	Stress (mN/mm2) (37)
Metabolic Maturation Strategy (Broad) - Vitamins and Minerals (3)	Stress (mN/mm2) (37)
Metabolic Maturation Strategy - Albumax (3)	Stress (mN/mm2) (37)
Metabolic Maturation Strategy - Ascorbic Acid (3)	Stress (mN/mm2) (37)
Metabolic Maturation Strategy - B27 (3)	Stress (mN/mm2) (37)
Metabolic Maturation Strategy - Biotin (3)	Stress (mN/mm2) (37)
Metabolic Maturation Strategy - Creatine (3)	Stress (mN/mm2) (37)
Metabolic Maturation Strategy - Insulin-Transferrin-Selenium (3)	Stress (mN/mm2) (37)
Metabolic Maturation Strategy - KOSR (3)	Stress (mN/mm2) (37)
Metabolic Maturation Strategy - L-carnitine (6)	Stress (mN/mm2) (37)
Metabolic Maturation Strategy - Lactate (4)	Stress (mN/mm2) (37)
Metabolic Maturation Strategy - Nonessential Amino Acids (3)	Stress (mN/mm2) (37)
Metabolic Maturation Strategy - Taurine (3)	Stress (mN/mm2) (37)
Metabolic Maturation Strategy - Vitamin B12 (3)	Stress (mN/mm2) (37)
Number of hiPSC Lines - Reported (313)	Stress (mN/mm2) (37)
Pharmacological Interventions - Blebbistatin (5)	Stress (mN/mm2) (37)
Pharmacological Interventions - Caffeine (4)	Stress (mN/mm2) (37)
Pharmacological Interventions - Carbamylcholine (6)	Stress (mN/mm2) (37)
Pharmacological Interventions - Carbenoxolone (4)	Stress (mN/mm2) (37)
Pharmacological Interventions - Cisapride (5)	Stress (mN/mm2) (37)
Pharmacological Interventions - Epinephrine (10)	Stress (mN/mm2) (37)
Pharmacological Interventions - Lidocaine (7)	Stress (mN/mm2) (37)
Pharmacological Interventions - Metoprolol (5)	Stress (mN/mm2) (37)
Pharmacological Interventions - Propranolol (5)	Stress (mN/mm2) (37)
Pharmacological Interventions - Ranolazine (6)	Stress (mN/mm2) (37)
Pharmacological Interventions - T3 (3)	Stress (mN/mm2) (37)
Pharmacological Interventions - Thalidomide (3)	Stress (mN/mm2) (37)
Purification Duration - 5 days (6)	Stress (mN/mm2) (37)
Purification Duration - 6 days (10)	Stress (mN/mm2) (37)
Purification Duration - 8 days (4)	Stress (mN/mm2) (37)
Purification Duration - >9 days (5)	Stress (mN/mm2) (37)
Purification Stategy - Antibiotic (3)	Stress (mN/mm2) (37)
Purification Stategy - Cell Sorting (7)	Stress (mN/mm2) (37)
Purification Stategy - Media (6)	Stress (mN/mm2) (37)
Resting Membrane Potential (mV) - Q1 (11)	Stress (mN/mm2) (37)
Scanning Electron Microscopy (21)	Stress (mN/mm2) (37)
Sex of hiPSC Lines - Both (10)	Stress (mN/mm2) (37)
Stress (mN/mm2) - Q1 (10)	Stress (mN/mm2) (37)
Stress (mN/mm2) - Q2 (9)	Stress (mN/mm2) (37)
Stress (mN/mm2) - Q3 (9)	Stress (mN/mm2) (37)
Stress (mN/mm2) - Q4 (9)	Stress (mN/mm2) (37)
Stress (mN/mm2) - Reported (37)	Stress (mN/mm2) (37)
Stress (mN/mm2) Quantiles (37)	Stress (mN/mm2) (37)
Time to Peak (ms) - Q4 (10)	Stress (mN/mm2) (37)
Time to Relaxation (ms) - Q2 (5)	Stress (mN/mm2) (37)
Time to Relaxation (ms) - Reported (10)	Stress (mN/mm2) (37)
Upstroke Velocity (um/s) - Q1 (10)	Stress (mN/mm2) (37)
Upstroke Velocity (um/s) - Q2 (10)	Stress (mN/mm2) (37)
Wnt Inhibition Duration - 3 days (17)	Stress (mN/mm2) (37)
Wnt Inhibition Duration - 6 days (4)	Stress (mN/mm2) (37)
Wnt Inhibitor - BMP4 (7)	Stress (mN/mm2) (37)
Wnt Inhibitor - DS-I-7 (11)	Stress (mN/mm2) (37)
Wnt Inhibitor - bFGF (8)	Stress (mN/mm2) (37)
hiPSC Backbone Media - Differentiation (1)	Stress (mN/mm2) (37)
hiPSC Backbone Media - Specialised (17)	Stress (mN/mm2) (37)
hiPSC Backbone Media - StemFit (5)	Stress (mN/mm2) (37)
hiPSC Line - 253G1 (10)	Stress (mN/mm2) (37)
hiPSC Line - BJ RiPS (4)	Stress (mN/mm2) (37)
hiPSC Line - C25 (6)	Stress (mN/mm2) (37)
hiPSC Line - Cellapy (4)	Stress (mN/mm2) (37)
hiPSC-CM Backbone Media - Commercial Cardiomyocyte Kit (12)	Stress (mN/mm2) (37)
hiPSC-CM Backbone Media - IMDM/E8/BPEL/APEL (8)	Stress (mN/mm2) (37)
hiPSC-CM Backbone Media - StemPro-34 (14)	Stress (mN/mm2) (37)
hiPSC-CM Maintenance/Maturation Media (if different) - Modified Essential Medium (1)	Stress (mN/mm2) (37)
hiPSC-CM Maintenance/Maturation Media (if different) - Specialised (8)	Stress (mN/mm2) (37)
hiPSC-CM Matrix Coating if Replated - Specialised (8)	Stress (mN/mm2) (37)
hiPSC-CM Media Supplement - 1-thioglycerol (14)	Stress (mN/mm2) (37)
hiPSC-CM Media Supplement - Essential Lipids (6)	Stress (mN/mm2) (37)
hiPSC-CM Media Supplement - GlutaMax (8)	Stress (mN/mm2) (37)
hiPSC-CM Media Supplement - L-glutamine (19)	Stress (mN/mm2) (37)
hiPSC-CM Media Supplement - Lipid Mix (5)	Stress (mN/mm2) (37)
hiPSC-CM Media Supplement - Mercaptoethanol (10)	Stress (mN/mm2) (37)
hiPSC-CM Media Supplement - Nonessential Amino Acids (7)	Stress (mN/mm2) (37)
hiPSC-CM Media Supplement - Polyvinylalchohol (6)	Stress (mN/mm2) (37)
hiPSC-CM Media Supplement - Selenium (7)	Stress (mN/mm2) (37)
hiPSC-CM Media Supplement - Transferrin (11)	Stress (mN/mm2) (37)
hiPSC-CM Media Supplement - VEGF (4)	Stress (mN/mm2) (37)
hiPSC-CM Media Supplement - bFGF (3)	Stress (mN/mm2) (37)
2D % Confluency - 95 to 100 (13)	Time to Peak (ms) (41)
2D % Confluency - EB (13)	Time to Peak (ms) (41)
2D Surface - Microparticle/fluid (3)	Time to Peak (ms) (41)
2D Surface - Nanotopography (6)	Time to Peak (ms) (41)
3D % Confluency - 95 to 100 (15)	Time to Peak (ms) (41)
3D % Confluency - EB (31)	Time to Peak (ms) (41)
3D Endothelial Cell Type - Specialised (3)	Time to Peak (ms) (41)
3D Platform - Fibronectin (3)	Time to Peak (ms) (41)
3D Platform - Gelatin (6)	Time to Peak (ms) (41)
3D Platform - Nanotechnology (3)	Time to Peak (ms) (41)
3D Platform - Polyethylene Glycol (8)	Time to Peak (ms) (41)
3D Stromal Cell Type - SMC (3)	Time to Peak (ms) (41)
3D Stromal Cell Type - hDF (7)	Time to Peak (ms) (41)
3D Stromal Cell Type - hiPSC-MC (3)	Time to Peak (ms) (41)
3D Tissue Media - Cor.4U (3)	Time to Peak (ms) (41)
3D Tissue Media - Specialised (4)	Time to Peak (ms) (41)
3D Tissue Media - StemPro-34 (4)	Time to Peak (ms) (41)
AP Amplitude (mV) - Q3 (9)	Time to Peak (ms) (41)
AP Conduction Velocity (cm/s) - Q2 (8)	Time to Peak (ms) (41)
Conduction Velocity (cm/s) - Q1 (7)	Time to Peak (ms) (41)
Conduction Velocity (cm/s) - Q2 (7)	Time to Peak (ms) (41)
Conduction Velocity (cm/s) - Reported (14)	Time to Peak (ms) (41)
Conduction Velocity (cm/s) Quantiles (14)	Time to Peak (ms) (41)
Contractile Analysis Method - Specialised (6)	Time to Peak (ms) (41)
Contractile Analysis Method - TFM (8)	Time to Peak (ms) (41)
Differentiation Purity % - 60 to 69 (5)	Time to Peak (ms) (41)
Differentiation Purity % - 75 to 79 (8)	Time to Peak (ms) (41)
Differentiation Purity % - <60 (9)	Time to Peak (ms) (41)
Differentiation Purity Assessment - Flow Cytometry a-actinin+ (9)	Time to Peak (ms) (41)
Differentiation Purity Assessment - IHC cTnT (7)	Time to Peak (ms) (41)
Differentiation Purity Assessment - Specialised (10)	Time to Peak (ms) (41)
Disease Modelling - Acute Myocardial Infarction (4)	Time to Peak (ms) (41)
Disease Modelling - Ischemic/Infarction (7)	Time to Peak (ms) (41)
Disease Modelling - Long QT Syndrome (3)	Time to Peak (ms) (41)
Disease Modelling - Metabolic Disorders (4)	Time to Peak (ms) (41)
Disease Modelling - Specialised (3)	Time to Peak (ms) (41)
Electrophysiology Analysis Method - Motion-Contrast Reconstruction (4)	Time to Peak (ms) (41)
Induction Conditions - Specialised (5)	Time to Peak (ms) (41)
Induction Conditions - StemCell Differentiation Kit (4)	Time to Peak (ms) (41)
Induction Conditions - Wnt3a (3)	Time to Peak (ms) (41)
Induction Duration - 4 days (15)	Time to Peak (ms) (41)
Induction Duration - 5 days (8)	Time to Peak (ms) (41)
Max Capture Rate (Hz) - Q2 (7)	Time to Peak (ms) (41)
Metabolic Analysis Method - Mitochondrial (4)	Time to Peak (ms) (41)
Metabolic Analysis Method - Specialised (8)	Time to Peak (ms) (41)
Metabolic Maturation Strategy (Broad) - Insulin and Related Components (3)	Time to Peak (ms) (41)
Metabolic Maturation Strategy (Broad) - Nutrition and Supplements (6)	Time to Peak (ms) (41)
Metabolic Maturation Strategy (Broad) - Serum and Serum Replacements (3)	Time to Peak (ms) (41)
Metabolic Maturation Strategy (Broad) - Specialised (4)	Time to Peak (ms) (41)
Metabolic Maturation Strategy (Broad) - Vitamins and Minerals (3)	Time to Peak (ms) (41)
Metabolic Maturation Strategy - Albumax (3)	Time to Peak (ms) (41)
Metabolic Maturation Strategy - Ascorbic Acid (3)	Time to Peak (ms) (41)
Metabolic Maturation Strategy - B27 (3)	Time to Peak (ms) (41)
Metabolic Maturation Strategy - Biotin (3)	Time to Peak (ms) (41)
Metabolic Maturation Strategy - Creatine (3)	Time to Peak (ms) (41)
Metabolic Maturation Strategy - Insulin-Transferrin-Selenium (3)	Time to Peak (ms) (41)
Metabolic Maturation Strategy - KOSR (3)	Time to Peak (ms) (41)
Metabolic Maturation Strategy - L-carnitine (6)	Time to Peak (ms) (41)
Metabolic Maturation Strategy - Lactate (4)	Time to Peak (ms) (41)
Metabolic Maturation Strategy - Nonessential Amino Acids (3)	Time to Peak (ms) (41)
Metabolic Maturation Strategy - Taurine (3)	Time to Peak (ms) (41)
Metabolic Maturation Strategy - Vitamin B12 (3)	Time to Peak (ms) (41)
Number of hiPSC Lines - Reported (313)	Time to Peak (ms) (41)
Pharmacological Interventions - Doxorubicin (17)	Time to Peak (ms) (41)
Pharmacological Interventions - Metoprolol (5)	Time to Peak (ms) (41)
Pharmacological Interventions - Phenylephrine (3)	Time to Peak (ms) (41)
Pharmacological Interventions - Propranolol (5)	Time to Peak (ms) (41)
Pharmacological Interventions - Ranolazine (6)	Time to Peak (ms) (41)
Pharmacological Interventions - T3 (3)	Time to Peak (ms) (41)
Pharmacological Interventions - Thalidomide (3)	Time to Peak (ms) (41)
Purification Duration - 6 days (10)	Time to Peak (ms) (41)
Purification Duration - 8 days (4)	Time to Peak (ms) (41)
Purification Stategy - Antibiotic (3)	Time to Peak (ms) (41)
Purification Stategy - Cell Sorting (7)	Time to Peak (ms) (41)
Resting Membrane Potential (mV) - Q1 (11)	Time to Peak (ms) (41)
Time to Peak (ms) - Q1 (11)	Time to Peak (ms) (41)
Time to Peak (ms) - Q2 (10)	Time to Peak (ms) (41)
Time to Peak (ms) - Q3 (10)	Time to Peak (ms) (41)
Time to Peak (ms) - Q4 (10)	Time to Peak (ms) (41)
Time to Peak (ms) - Reported (41)	Time to Peak (ms) (41)
Time to Peak (ms) Quantiles (41)	Time to Peak (ms) (41)
Wnt Inhibition Duration - 4 days (19)	Time to Peak (ms) (41)
Wnt Inhibition Duration - 6 days (4)	Time to Peak (ms) (41)
Wnt Inhibitor - BMP4 (7)	Time to Peak (ms) (41)
Wnt Inhibitor - KY02111 (7)	Time to Peak (ms) (41)
Wnt Inhibitor - VEGF (3)	Time to Peak (ms) (41)
Wnt Inhibitor - bFGF (8)	Time to Peak (ms) (41)
hiPSC Backbone Media - Conditioned (12)	Time to Peak (ms) (41)
hiPSC Backbone Media - DMEM (10)	Time to Peak (ms) (41)
hiPSC Backbone Media - Differentiation (1)	Time to Peak (ms) (41)
hiPSC Backbone Media - StemFit (5)	Time to Peak (ms) (41)
hiPSC Line - 201B6 (3)	Time to Peak (ms) (41)
hiPSC Line - 201B7 (9)	Time to Peak (ms) (41)
hiPSC Line - 253G1 (10)	Time to Peak (ms) (41)
hiPSC Line - BJ RiPS (4)	Time to Peak (ms) (41)
hiPSC Line - C25 (6)	Time to Peak (ms) (41)
hiPSC Line - Cellapy (4)	Time to Peak (ms) (41)
hiPSC Line - Cor.4U (16)	Time to Peak (ms) (41)
hiPSC Line - Reported (310)	Time to Peak (ms) (41)
hiPSC Line - SCVI-273 (8)	Time to Peak (ms) (41)
hiPSC-CM Backbone Media - Cor.4U Complete Medium (6)	Time to Peak (ms) (41)
hiPSC-CM Backbone Media - DMEM (18)	Time to Peak (ms) (41)
hiPSC-CM Backbone Media - Reported (301)	Time to Peak (ms) (41)
hiPSC-CM Backbone Media - StemPro-34 (14)	Time to Peak (ms) (41)
hiPSC-CM Maintenance/Maturation Media (if different) - DMEM/F12 (6)	Time to Peak (ms) (41)
hiPSC-CM Maintenance/Maturation Media (if different) - Specialised (8)	Time to Peak (ms) (41)
hiPSC-CM Matrix Coating if Replated - Laminin (5)	Time to Peak (ms) (41)
hiPSC-CM Media Supplement - Essential Lipids (6)	Time to Peak (ms) (41)
hiPSC-CM Media Supplement - FBS (16)	Time to Peak (ms) (41)
hiPSC-CM Media Supplement - Lipid Mix (5)	Time to Peak (ms) (41)
hiPSC-CM Media Supplement - Nonessential Amino Acids (7)	Time to Peak (ms) (41)
hiPSC-CM Media Supplement - Polyvinylalchohol (6)	Time to Peak (ms) (41)
hiPSC-CM Media Supplement - Selenium (7)	Time to Peak (ms) (41)
hiPSC-CM Media Supplement - Specialised (13)	Time to Peak (ms) (41)
hiPSC-CM Media Supplement - Transferrin (11)	Time to Peak (ms) (41)
hiPSC-CM Media Supplement - VEGF (4)	Time to Peak (ms) (41)
hiPSC-CM Media Supplement - bFGF (3)	Time to Peak (ms) (41)
2D % Confluency - 70 to 79 (5)	Time to Relaxation (ms) (10)
2D % Confluency - 80 to 84 (4)	Time to Relaxation (ms) (10)
2D % Confluency - 85 to 89 (31)	Time to Relaxation (ms) (10)
2D % Confluency - 90 to 94 (10)	Time to Relaxation (ms) (10)
2D % Confluency - 95 to 100 (13)	Time to Relaxation (ms) (10)
2D % Confluency - EB (13)	Time to Relaxation (ms) (10)
2D Surface - Decellularized ECM (3)	Time to Relaxation (ms) (10)
2D Surface - ECM-coated (114)	Time to Relaxation (ms) (10)
2D Surface - Microelectrode Array (9)	Time to Relaxation (ms) (10)
2D Surface - Microparticle/fluid (3)	Time to Relaxation (ms) (10)
2D Surface - Micropatterned (24)	Time to Relaxation (ms) (10)
2D Surface - Nanotopography (6)	Time to Relaxation (ms) (10)
2D Surface - Reported (137)(177)	Time to Relaxation (ms) (10)
3D % Confluency - 70 to 79 (4)	Time to Relaxation (ms) (10)
3D % Confluency - 80 to 84 (6)	Time to Relaxation (ms) (10)
3D % Confluency - 85 to 89 (12)	Time to Relaxation (ms) (10)
3D % Confluency - 95 to 100 (15)	Time to Relaxation (ms) (10)
3D % Confluency - EB (31)	Time to Relaxation (ms) (10)
3D Endothelial Cell Type - CMVEC (5)	Time to Relaxation (ms) (10)
3D Endothelial Cell Type - HUVEC (9)	Time to Relaxation (ms) (10)
3D Endothelial Cell Type - Specialised (3)	Time to Relaxation (ms) (10)
3D Endothelial Cell Type - hiPSC-EC (16)	Time to Relaxation (ms) (10)
3D Estimated Tissue Cell Density (10^6 cells/mL) Q1 <2.82 (40)	Time to Relaxation (ms) (10)
3D Estimated Tissue Cell Density (10^6 cells/mL) Q3 >10.8 (40)	Time to Relaxation (ms) (10)
3D Estimated Tissue Size (mm2) Q1 <0.28 (34)	Time to Relaxation (ms) (10)
3D Estimated Tissue Size (mm2) Q3 4 to 20 (33)	Time to Relaxation (ms) (10)
3D Estimated Tissue Size (mm2) Q3 >20 (32)	Time to Relaxation (ms) (10)
3D Estimated Tissue Size (mm2) Quantiles (133)	Time to Relaxation (ms) (10)
3D Platform - 3D printed (9)	Time to Relaxation (ms) (10)
3D Platform - Decellularised (15)	Time to Relaxation (ms) (10)
3D Platform - Fibronectin (3)	Time to Relaxation (ms) (10)
3D Platform - Gelatin (6)	Time to Relaxation (ms) (10)
3D Platform - Nanotechnology (3)	Time to Relaxation (ms) (10)
3D Platform - Polyethylene Glycol (8)	Time to Relaxation (ms) (10)
3D SC % Composition - >24 (30)	Time to Relaxation (ms) (10)
3D Stromal Cell Type - SC (34)	Time to Relaxation (ms) (10)
3D Stromal Cell Type - SMC (3)	Time to Relaxation (ms) (10)
3D Stromal Cell Type - Specialised (11)	Time to Relaxation (ms) (10)
3D Stromal Cell Type - hCF (30)	Time to Relaxation (ms) (10)
3D Stromal Cell Type - hDF (7)	Time to Relaxation (ms) (10)
3D Stromal Cell Type - hFF (6)	Time to Relaxation (ms) (10)
3D Stromal Cell Type - hiPSC-CF (8)	Time to Relaxation (ms) (10)
3D Stromal Cell Type - hiPSC-MC (3)	Time to Relaxation (ms) (10)
3D Tissue Media - Cor.4U (3)	Time to Relaxation (ms) (10)
3D Tissue Media - High-glucose DMEM (7)	Time to Relaxation (ms) (10)
3D Tissue Media - MEM-α (6)	Time to Relaxation (ms) (10)
3D Tissue Media - Specialised (4)	Time to Relaxation (ms) (10)
3D Tissue Media - StemPro-34 (4)	Time to Relaxation (ms) (10)
3D Tissue Media - iCell Maintenance Medium (12)	Time to Relaxation (ms) (10)
AP Amplitude (mV) - Q1 (11)	Time to Relaxation (ms) (10)
AP Amplitude (mV) - Q2 (10)	Time to Relaxation (ms) (10)
AP Amplitude (mV) - Q4 (10)	Time to Relaxation (ms) (10)
AP Amplitude (mV) - Reported(40)	Time to Relaxation (ms) (10)
AP Conduction Velocity (cm/s) - Q1 (7)	Time to Relaxation (ms) (10)
AP Conduction Velocity (cm/s) - Q2 (8)	Time to Relaxation (ms) (10)
AP Conduction Velocity (cm/s) - Q3 (6)	Time to Relaxation (ms) (10)
AP Conduction Velocity (cm/s) - Q4 (7)	Time to Relaxation (ms) (10)
AP Conduction Velocity (cm/s) - Reported (28)	Time to Relaxation (ms) (10)
AP Conduction Velocity (cm/s) Quantiles (28)	Time to Relaxation (ms) (10)
Amplitude (F/F0) - Q1 (13)	Time to Relaxation (ms) (10)
Amplitude (F/F0) - Q3 (12)	Time to Relaxation (ms) (10)
Beat Rate (beats per minute) - Q3 (10)	Time to Relaxation (ms) (10)
Beat Rate (beats per minute) - Q4 (13)	Time to Relaxation (ms) (10)
CM Immunofluorescent Imaging (261)	Time to Relaxation (ms) (10)
Calcium Handling Analysis Method - Reported (124)	Time to Relaxation (ms) (10)
Calcium Handling Analysis Method - Specialised (3)	Time to Relaxation (ms) (10)
Conduction Velocity (cm/s) - Q1 (7)	Time to Relaxation (ms) (10)
Conduction Velocity (cm/s) - Reported (14)	Time to Relaxation (ms) (10)
Contractile Analysis Method - Post Deflection (39)	Time to Relaxation (ms) (10)
Contractile Analysis Method - Reported(163)	Time to Relaxation (ms) (10)
Contractile Analysis Method - Specialised (6)	Time to Relaxation (ms) (10)
Contractile Analysis Method - TFM (8)	Time to Relaxation (ms) (10)
Differentiation Purity % - 60 to 69 (5)	Time to Relaxation (ms) (10)
Differentiation Purity % - 75 to 79 (8)	Time to Relaxation (ms) (10)
Differentiation Purity % - 80 to 84 (25)	Time to Relaxation (ms) (10)
Differentiation Purity % - 90 to 94 (37)	Time to Relaxation (ms) (10)
Differentiation Purity % - 95 to 100 (35)	Time to Relaxation (ms) (10)
Differentiation Purity % - <60 (9)	Time to Relaxation (ms) (10)
Differentiation Purity % - Reported (153)	Time to Relaxation (ms) (10)
Differentiation Purity Assessment - Flow Cytometry SIRPA+ (4)	Time to Relaxation (ms) (10)
Differentiation Purity Assessment - Flow Cytometry VCAM1+ (4)	Time to Relaxation (ms) (10)
Differentiation Purity Assessment - Flow Cytometry cTnI+ (3)	Time to Relaxation (ms) (10)
Differentiation Purity Assessment - IHC a-actinin (8)	Time to Relaxation (ms) (10)
Differentiation Purity Assessment - IHC cTnT (7)	Time to Relaxation (ms) (10)
Differentiation Purity Assessment - Visual Inspection (4)	Time to Relaxation (ms) (10)
Disease Modelling - Acute Myocardial Infarction (4)	Time to Relaxation (ms) (10)
Disease Modelling - Arrhythmic (15)	Time to Relaxation (ms) (10)
Disease Modelling - Arrhythmogenic Cardiomyopathy (10)	Time to Relaxation (ms) (10)
Disease Modelling - DCM (5)	Time to Relaxation (ms) (10)
Disease Modelling - Fibrotic (3)	Time to Relaxation (ms) (10)
Disease Modelling - Genetic Disorders (23)	Time to Relaxation (ms) (10)
Disease Modelling - HCM (6)	Time to Relaxation (ms) (10)
Disease Modelling - Ischemic/Infarction (7)	Time to Relaxation (ms) (10)
Disease Modelling - Left Ventricular (15)	Time to Relaxation (ms) (10)
Disease Modelling - Long QT Syndrome (3)	Time to Relaxation (ms) (10)
Disease Modelling - Metabolic Disorders (4)	Time to Relaxation (ms) (10)
Disease Modelling - Specialised (3)	Time to Relaxation (ms) (10)
Elastomeric Maturation (33)	Time to Relaxation (ms) (10)
Electrophysiology Analysis Method - Genetical (3)	Time to Relaxation (ms) (10)
Electrophysiology Analysis Method - Microelectrode (29)	Time to Relaxation (ms) (10)
Electrophysiology Analysis Method - Motion-Contrast Reconstruction (4)	Time to Relaxation (ms) (10)
Electrophysiology Analysis Method - Optical Mapping (39)	Time to Relaxation (ms) (10)
Electrophysiology Analysis Method - Reported (117)	Time to Relaxation (ms) (10)
Force (mN) - Q1 (13)	Time to Relaxation (ms) (10)
Force (mN) - Q2 (12)	Time to Relaxation (ms) (10)
Force (mN) - Q3 (11)	Time to Relaxation (ms) (10)
Force (mN) - Q4 (12)	Time to Relaxation (ms) (10)
Force (mN) - Reported (48)	Time to Relaxation (ms) (10)
Gene Analysis Method - PCR (131)	Time to Relaxation (ms) (10)
Gene Analysis Method - Specialised (6)	Time to Relaxation (ms) (10)
Induction Conditions - Activin A (75)	Time to Relaxation (ms) (10)
Induction Conditions - BMP4 (74)	Time to Relaxation (ms) (10)
Induction Conditions - CHIR99021 (174)	Time to Relaxation (ms) (10)
Induction Conditions - Specialised (5)	Time to Relaxation (ms) (10)
Induction Conditions - StemCell Differentiation Kit (4)	Time to Relaxation (ms) (10)
Induction Conditions - Wnt3a (3)	Time to Relaxation (ms) (10)
Induction Conditions - bFGF (45)	Time to Relaxation (ms) (10)
Induction Duration - 4 days (15)	Time to Relaxation (ms) (10)
Induction Duration - 5 days (8)	Time to Relaxation (ms) (10)
Insulin Addition - Reported (175)	Time to Relaxation (ms) (10)
Max Capture Rate (Hz) - Q1 (8)	Time to Relaxation (ms) (10)
Max Capture Rate (Hz) - Q2 (7)	Time to Relaxation (ms) (10)
Max Capture Rate (Hz) - Reported (15)	Time to Relaxation (ms) (10)
Max Capture Rate (Hz) Quantiles (15)	Time to Relaxation (ms) (10)
Measured Fatty Acid Metabolism (18)	Time to Relaxation (ms) (10)
Metabolic Analysis Method - Mitochondrial (4)	Time to Relaxation (ms) (10)
Metabolic Analysis Method - Reported (45)	Time to Relaxation (ms) (10)
Metabolic Analysis Method - Seahorse (35)	Time to Relaxation (ms) (10)
Metabolic Analysis Method - Specialised (8)	Time to Relaxation (ms) (10)
Metabolic Maturation (30)	Time to Relaxation (ms) (10)
Metabolic Maturation Strategy (Broad) - Amino Acids and Derivatives (5)	Time to Relaxation (ms) (10)
Metabolic Maturation Strategy (Broad) - Glucocorticoids (7)	Time to Relaxation (ms) (10)
Metabolic Maturation Strategy (Broad) - Growth Factors (4)	Time to Relaxation (ms) (10)
Metabolic Maturation Strategy (Broad) - Hormonal Stimulation (15)	Time to Relaxation (ms) (10)
Metabolic Maturation Strategy (Broad) - Insulin and Related Components (3)	Time to Relaxation (ms) (10)
Metabolic Maturation Strategy (Broad) - Kinase Inhibitors (3)	Time to Relaxation (ms) (10)
Metabolic Maturation Strategy (Broad) - Known (30)	Time to Relaxation (ms) (10)
Metabolic Maturation Strategy (Broad) - Nutrition and Supplements (6)	Time to Relaxation (ms) (10)
Metabolic Maturation Strategy (Broad) - Serum and Serum Replacements (3)	Time to Relaxation (ms) (10)
Metabolic Maturation Strategy (Broad) - Signaling Pathway Regulators (6)	Time to Relaxation (ms) (10)
Metabolic Maturation Strategy (Broad) - Specialised (4)	Time to Relaxation (ms) (10)
Metabolic Maturation Strategy (Broad) - Structural and Functional Protein (5)	Time to Relaxation (ms) (10)
Metabolic Maturation Strategy (Broad) - Sugar and Carbohydrates (7)	Time to Relaxation (ms) (10)
Metabolic Maturation Strategy (Broad) - Thyroid Hormones (14)	Time to Relaxation (ms) (10)
Metabolic Maturation Strategy (Broad) - Vitamins and Minerals (3)	Time to Relaxation (ms) (10)
Metabolic Maturation Strategy - Albumax (3)	Time to Relaxation (ms) (10)
Metabolic Maturation Strategy - Ascorbic Acid (3)	Time to Relaxation (ms) (10)
Metabolic Maturation Strategy - B27 (3)	Time to Relaxation (ms) (10)
Metabolic Maturation Strategy - Biotin (3)	Time to Relaxation (ms) (10)
Metabolic Maturation Strategy - Creatine (3)	Time to Relaxation (ms) (10)
Metabolic Maturation Strategy - Dexamethasone (7)	Time to Relaxation (ms) (10)
Metabolic Maturation Strategy - Galactose (3)	Time to Relaxation (ms) (10)
Metabolic Maturation Strategy - IGF-1 (3)	Time to Relaxation (ms) (10)
Metabolic Maturation Strategy - Insulin-Transferrin-Selenium (3)	Time to Relaxation (ms) (10)
Metabolic Maturation Strategy - KOSR (3)	Time to Relaxation (ms) (10)
Metabolic Maturation Strategy - L-carnitine (6)	Time to Relaxation (ms) (10)
Metabolic Maturation Strategy - Lactate (4)	Time to Relaxation (ms) (10)
Metabolic Maturation Strategy - Linoleic/Oleic Acid (4)	Time to Relaxation (ms) (10)
Metabolic Maturation Strategy - Nonessential Amino Acids (3)	Time to Relaxation (ms) (10)
Metabolic Maturation Strategy - Reported (30)	Time to Relaxation (ms) (10)
Metabolic Maturation Strategy - T3 (14)	Time to Relaxation (ms) (10)
Metabolic Maturation Strategy - Taurine (3)	Time to Relaxation (ms) (10)
Metabolic Maturation Strategy - Vitamin B12 (3)	Time to Relaxation (ms) (10)
Number of hiPSC Lines - 1 (218)	Time to Relaxation (ms) (10)
Number of hiPSC Lines - 2 (50)	Time to Relaxation (ms) (10)
Number of hiPSC Lines - 4 (10)	Time to Relaxation (ms) (10)
Number of hiPSC Lines - >5 (8)	Time to Relaxation (ms) (10)
Number of hiPSC Lines - Reported (313)	Time to Relaxation (ms) (10)
Pharmacological Interventions - Blebbistatin (5)	Time to Relaxation (ms) (10)
Pharmacological Interventions - Caffeine (4)	Time to Relaxation (ms) (10)
Pharmacological Interventions - Carbamylcholine (6)	Time to Relaxation (ms) (10)
Pharmacological Interventions - Cisapride (5)	Time to Relaxation (ms) (10)
Pharmacological Interventions - Doxorubicin (17)	Time to Relaxation (ms) (10)
Pharmacological Interventions - E4031 (22)	Time to Relaxation (ms) (10)
Pharmacological Interventions - Metoprolol (5)	Time to Relaxation (ms) (10)
Pharmacological Interventions - Phenylephrine (3)	Time to Relaxation (ms) (10)
Pharmacological Interventions - Propranolol (5)	Time to Relaxation (ms) (10)
Pharmacological Interventions - Ranolazine (6)	Time to Relaxation (ms) (10)
Pharmacological Interventions - T3 (3)	Time to Relaxation (ms) (10)
Pharmacological Interventions - Thalidomide (3)	Time to Relaxation (ms) (10)
Pharmacological Interventions - Verapamil (27)	Time to Relaxation (ms) (10)
Purification Duration - 3 days (12)	Time to Relaxation (ms) (10)
Purification Duration - 4 days (28)	Time to Relaxation (ms) (10)
Purification Duration - 5 days (6)	Time to Relaxation (ms) (10)
Purification Duration - 6 days (10)	Time to Relaxation (ms) (10)
Purification Duration - 7 days (6)	Time to Relaxation (ms) (10)
Purification Duration - 8 days (4)	Time to Relaxation (ms) (10)
Purification Duration - <3 days (17)	Time to Relaxation (ms) (10)
Purification Duration - >9 days (5)	Time to Relaxation (ms) (10)
Purification Stategy - Antibiotic (3)	Time to Relaxation (ms) (10)
Purification Stategy - Cell Sorting (7)	Time to Relaxation (ms) (10)
Purification Stategy - Media (6)	Time to Relaxation (ms) (10)
Resting Membrane Potential (mV) - Q1 (11)	Time to Relaxation (ms) (10)
Resting Membrane Potential (mV) - Q2 (13)	Time to Relaxation (ms) (10)
Resting Membrane Potential (mV) - Q3 (11)	Time to Relaxation (ms) (10)
Resting Membrane Potential (mV) - Q4 (9)	Time to Relaxation (ms) (10)
Resting Membrane Potential (mV) Quantiles (44)	Time to Relaxation (ms) (10)
Sarcomere Length (um) - Mature Q2 1.7 to 1.9 (28)	Time to Relaxation (ms) (10)
Sarcomere Length (um) Q1 <1.7 (19)	Time to Relaxation (ms) (10)
Sarcomere Length (um) Q3 >1.9 (17)	Time to Relaxation (ms) (10)
Sarcomere/Cellular Alignment Analysis (67)	Time to Relaxation (ms) (10)
Sex of hiPSC Lines - Both (10)	Time to Relaxation (ms) (10)
Sex of hiPSC Lines - Female (42)	Time to Relaxation (ms) (10)
Stress (mN/mm2) - Q1 (10)	Time to Relaxation (ms) (10)
Stress (mN/mm2) - Q2 (9)	Time to Relaxation (ms) (10)
Stress (mN/mm2) - Q3 (9)	Time to Relaxation (ms) (10)
Stress (mN/mm2) - Q4 (9)	Time to Relaxation (ms) (10)
Stress (mN/mm2) Quantiles (37)	Time to Relaxation (ms) (10)
T-tubules Observed (18)	Time to Relaxation (ms) (10)
Time to Peak (ms) - Q2 (10)	Time to Relaxation (ms) (10)
Time to Peak (ms) - Q4 (10)	Time to Relaxation (ms) (10)
Time to Relaxation (ms) - Q1 (5)	Time to Relaxation (ms) (10)
Time to Relaxation (ms) - Q2 (5)	Time to Relaxation (ms) (10)
Time to Relaxation (ms) - Reported (10)	Time to Relaxation (ms) (10)
Time to Relaxation (ms) Quantiles (10)	Time to Relaxation (ms) (10)
Upstroke Velocity (um/s) - Q1 (10)	Time to Relaxation (ms) (10)
Upstroke Velocity (um/s) - Q3 (11)	Time to Relaxation (ms) (10)
Upstroke Velocity (um/s) - Q4 (9)	Time to Relaxation (ms) (10)
Upstroke Velocity (um/s) - Reported (40)	Time to Relaxation (ms) (10)
Upstroke Velocity (um/s) Quantiles (40)	Time to Relaxation (ms) (10)
Wnt Inhibition Duration - 1 day (12)	Time to Relaxation (ms) (10)
Wnt Inhibition Duration - 3 days (17)	Time to Relaxation (ms) (10)
Wnt Inhibition Duration - 4 days (19)	Time to Relaxation (ms) (10)
Wnt Inhibition Duration - 5 days (6)	Time to Relaxation (ms) (10)
Wnt Inhibition Duration - 6 days (4)	Time to Relaxation (ms) (10)
Wnt Inhibition Duration - >6 days (12)	Time to Relaxation (ms) (10)
Wnt Inhibitor - BMP4 (7)	Time to Relaxation (ms) (10)
Wnt Inhibitor - DS-I-7 (11)	Time to Relaxation (ms) (10)
Wnt Inhibitor - KY02111 (7)	Time to Relaxation (ms) (10)
Wnt Inhibitor - Others (9)	Time to Relaxation (ms) (10)
Wnt Inhibitor - Reported (227)	Time to Relaxation (ms) (10)
Wnt Inhibitor - VEGF (3)	Time to Relaxation (ms) (10)
Wnt Inhibitor - XAV939 (23)	Time to Relaxation (ms) (10)
Wnt Inhibitor - bFGF (8)	Time to Relaxation (ms) (10)
hiPSC Backbone Media - Conditioned (12)	Time to Relaxation (ms) (10)
hiPSC Backbone Media - DMEM (10)	Time to Relaxation (ms) (10)
hiPSC Backbone Media - Differentiation (1)	Time to Relaxation (ms) (10)
hiPSC Backbone Media - Embryonic Stem Cell (20)	Time to Relaxation (ms) (10)
hiPSC Backbone Media - Essential 8 (82)	Time to Relaxation (ms) (10)
hiPSC Backbone Media - Specialised (17)	Time to Relaxation (ms) (10)
hiPSC Backbone Media - StemFit (5)	Time to Relaxation (ms) (10)
hiPSC Backbone Media - StemFlex (5)	Time to Relaxation (ms) (10)
hiPSC Line - 201B6 (3)	Time to Relaxation (ms) (10)
hiPSC Line - 201B7 (9)	Time to Relaxation (ms) (10)
hiPSC Line - 253G1 (10)	Time to Relaxation (ms) (10)
hiPSC Line - ATCC (5)	Time to Relaxation (ms) (10)
hiPSC Line - BJ RiPS (4)	Time to Relaxation (ms) (10)
hiPSC Line - BJ1 (7)	Time to Relaxation (ms) (10)
hiPSC Line - C25 (6)	Time to Relaxation (ms) (10)
hiPSC Line - Cellapy (4)	Time to Relaxation (ms) (10)
hiPSC Line - Cor.4U (16)	Time to Relaxation (ms) (10)
hiPSC Line - DF19-9-11T.H (16)	Time to Relaxation (ms) (10)
hiPSC Line - Gibco episomal (10)	Time to Relaxation (ms) (10)
hiPSC Line - PGP1 (11)	Time to Relaxation (ms) (10)
hiPSC Line - Reported (310)	Time to Relaxation (ms) (10)
hiPSC Line - SCVI-273 (8)	Time to Relaxation (ms) (10)
hiPSC Line - Specialised (121)	Time to Relaxation (ms) (10)
hiPSC Line - iCell (46)	Time to Relaxation (ms) (10)
hiPSC Line - iCell2 (8)	Time to Relaxation (ms) (10)
hiPSC-CM Backbone Media - Commercial Cardiomyocyte Kit (12)	Time to Relaxation (ms) (10)
hiPSC-CM Backbone Media - Cor.4U Complete Medium (6)	Time to Relaxation (ms) (10)
hiPSC-CM Backbone Media - DMEM (18)	Time to Relaxation (ms) (10)
hiPSC-CM Backbone Media - IMDM/E8/BPEL/APEL (8)	Time to Relaxation (ms) (10)
hiPSC-CM Backbone Media - RPMI-1640 (161)	Time to Relaxation (ms) (10)
hiPSC-CM Backbone Media - Reported (301)	Time to Relaxation (ms) (10)
hiPSC-CM Backbone Media - StemPro-34 (14)	Time to Relaxation (ms) (10)
hiPSC-CM Maintenance/Maturation Media (if different) - DMEM (11)	Time to Relaxation (ms) (10)
hiPSC-CM Maintenance/Maturation Media (if different) - DMEM/F12 (6)	Time to Relaxation (ms) (10)
hiPSC-CM Maintenance/Maturation Media (if different) - RPMI-1640 (26)	Time to Relaxation (ms) (10)
hiPSC-CM Maintenance/Maturation Media (if different) - Specialised (8)	Time to Relaxation (ms) (10)
hiPSC-CM Matrix Coating if Replated - Fibronectin (32)	Time to Relaxation (ms) (10)
hiPSC-CM Matrix Coating if Replated - Geltrex (10)	Time to Relaxation (ms) (10)
hiPSC-CM Matrix Coating if Replated - Laminin (5)	Time to Relaxation (ms) (10)
hiPSC-CM Matrix Coating if Replated - Specialised (8)	Time to Relaxation (ms) (10)
hiPSC-CM Matrix Coating if Replated - Synthemax (3)	Time to Relaxation (ms) (10)
hiPSC-CM Media Supplement - 1-thioglycerol (14)	Time to Relaxation (ms) (10)
hiPSC-CM Media Supplement - Albumin (23)	Time to Relaxation (ms) (10)
hiPSC-CM Media Supplement - Essential Lipids (6)	Time to Relaxation (ms) (10)
hiPSC-CM Media Supplement - FBS (16)	Time to Relaxation (ms) (10)
hiPSC-CM Media Supplement - HEPES (16)	Time to Relaxation (ms) (10)
hiPSC-CM Media Supplement - L-glutamine (19)	Time to Relaxation (ms) (10)
hiPSC-CM Media Supplement - Lipid Mix (5)	Time to Relaxation (ms) (10)
hiPSC-CM Media Supplement - Mercaptoethanol (10)	Time to Relaxation (ms) (10)
hiPSC-CM Media Supplement - Polyvinylalchohol (6)	Time to Relaxation (ms) (10)
hiPSC-CM Media Supplement - Reported (275)	Time to Relaxation (ms) (10)
hiPSC-CM Media Supplement - Selenium (7)	Time to Relaxation (ms) (10)
hiPSC-CM Media Supplement - Specialised (13)	Time to Relaxation (ms) (10)
hiPSC-CM Media Supplement - Transferrin (11)	Time to Relaxation (ms) (10)
hiPSC-CM Media Supplement - VEGF (4)	Time to Relaxation (ms) (10)
hiPSC-CM Media Supplement - bFGF (3)	Time to Relaxation (ms) (10)
hiPSC-CM Media Supplement - iCell Maintenance Medium (41)	Time to Relaxation (ms) (10)
2D % Confluency - 80 to 84 (4)	Upstroke Velocity (um/s) (40)
2D Surface - Microelectrode Array (9)	Upstroke Velocity (um/s) (40)
3D % Confluency - 80 to 84 (6)	Upstroke Velocity (um/s) (40)
3D Endothelial Cell Type - HUVEC (9)	Upstroke Velocity (um/s) (40)
3D Endothelial Cell Type - Specialised (3)	Upstroke Velocity (um/s) (40)
3D Stromal Cell Type - hFF (6)	Upstroke Velocity (um/s) (40)
3D Stromal Cell Type - hiPSC-MC (3)	Upstroke Velocity (um/s) (40)
3D Tissue Media - Cor.4U (3)	Upstroke Velocity (um/s) (40)
3D Tissue Media - EGM2 (6)	Upstroke Velocity (um/s) (40)
3D Tissue Media - Iscove (5)	Upstroke Velocity (um/s) (40)
3D Tissue Media - MEM-α (6)	Upstroke Velocity (um/s) (40)
3D Tissue Media - Specialised (4)	Upstroke Velocity (um/s) (40)
3D Tissue Media - StemPro-34 (4)	Upstroke Velocity (um/s) (40)
AP Amplitude (mV) - Q3 (9)	Upstroke Velocity (um/s) (40)
AP Conduction Velocity (cm/s) - Q1 (7)	Upstroke Velocity (um/s) (40)
AP Conduction Velocity (cm/s) - Q2 (8)	Upstroke Velocity (um/s) (40)
Beat Rate (beats per minute) - Q3 (10)	Upstroke Velocity (um/s) (40)
Calcium Handling Analysis Method - Specialised (3)	Upstroke Velocity (um/s) (40)
Conduction Velocity (cm/s) - Q2 (7)	Upstroke Velocity (um/s) (40)
Contractile Analysis Method - Reported(163)	Upstroke Velocity (um/s) (40)
Contractile Analysis Method - TFM (8)	Upstroke Velocity (um/s) (40)
Differentiation Purity % - 60 to 69 (5)	Upstroke Velocity (um/s) (40)
Differentiation Purity % - <60 (9)	Upstroke Velocity (um/s) (40)
Differentiation Purity Assessment - Flow Cytometry SIRPA+ (4)	Upstroke Velocity (um/s) (40)
Differentiation Purity Assessment - Flow Cytometry VCAM1+ (4)	Upstroke Velocity (um/s) (40)
Differentiation Purity Assessment - Flow Cytometry a-actinin+ (9)	Upstroke Velocity (um/s) (40)
Differentiation Purity Assessment - Flow Cytometry cTnI+ (3)	Upstroke Velocity (um/s) (40)
Disease Modelling - Acute Myocardial Infarction (4)	Upstroke Velocity (um/s) (40)
Disease Modelling - Arrhythmogenic Cardiomyopathy (10)	Upstroke Velocity (um/s) (40)
Disease Modelling - DCM (5)	Upstroke Velocity (um/s) (40)
Disease Modelling - Fibrotic (3)	Upstroke Velocity (um/s) (40)
Disease Modelling - Ischemic/Infarction (7)	Upstroke Velocity (um/s) (40)
Disease Modelling - Long QT Syndrome (3)	Upstroke Velocity (um/s) (40)
Disease Modelling - Metabolic Disorders (4)	Upstroke Velocity (um/s) (40)
Disease Modelling - Myocardium (11)	Upstroke Velocity (um/s) (40)
Disease Modelling - Specialised (3)	Upstroke Velocity (um/s) (40)
Electrophysiology Analysis Method - Genetical (3)	Upstroke Velocity (um/s) (40)
Force (mN) - Q4 (12)	Upstroke Velocity (um/s) (40)
Gene Analysis Method - Specialised (6)	Upstroke Velocity (um/s) (40)
Induction Conditions - Specialised (5)	Upstroke Velocity (um/s) (40)
Induction Conditions - StemCell Differentiation Kit (4)	Upstroke Velocity (um/s) (40)
Induction Conditions - Wnt3a (3)	Upstroke Velocity (um/s) (40)
Induction Duration - 5 days (8)	Upstroke Velocity (um/s) (40)
Max Capture Rate (Hz) - Q2 (7)	Upstroke Velocity (um/s) (40)
Metabolic Analysis Method - Mitochondrial (4)	Upstroke Velocity (um/s) (40)
Metabolic Analysis Method - Specialised (8)	Upstroke Velocity (um/s) (40)
Metabolic Maturation Strategy (Broad) - Growth Factors (4)	Upstroke Velocity (um/s) (40)
Metabolic Maturation Strategy (Broad) - Insulin and Related Components (3)	Upstroke Velocity (um/s) (40)
Metabolic Maturation Strategy (Broad) - Nutrition and Supplements (6)	Upstroke Velocity (um/s) (40)
Metabolic Maturation Strategy (Broad) - Serum and Serum Replacements (3)	Upstroke Velocity (um/s) (40)
Metabolic Maturation Strategy (Broad) - Signaling Pathway Regulators (6)	Upstroke Velocity (um/s) (40)
Metabolic Maturation Strategy (Broad) - Vitamins and Minerals (3)	Upstroke Velocity (um/s) (40)
Metabolic Maturation Strategy - Albumax (3)	Upstroke Velocity (um/s) (40)
Metabolic Maturation Strategy - Ascorbic Acid (3)	Upstroke Velocity (um/s) (40)
Metabolic Maturation Strategy - B27 (3)	Upstroke Velocity (um/s) (40)
Metabolic Maturation Strategy - Biotin (3)	Upstroke Velocity (um/s) (40)
Metabolic Maturation Strategy - Creatine (3)	Upstroke Velocity (um/s) (40)
Metabolic Maturation Strategy - IGF-1 (3)	Upstroke Velocity (um/s) (40)
Metabolic Maturation Strategy - Insulin-Transferrin-Selenium (3)	Upstroke Velocity (um/s) (40)
Metabolic Maturation Strategy - KOSR (3)	Upstroke Velocity (um/s) (40)
Metabolic Maturation Strategy - L-carnitine (6)	Upstroke Velocity (um/s) (40)
Metabolic Maturation Strategy - Lactate (4)	Upstroke Velocity (um/s) (40)
Metabolic Maturation Strategy - Linoleic/Oleic Acid (4)	Upstroke Velocity (um/s) (40)
Metabolic Maturation Strategy - Nonessential Amino Acids (3)	Upstroke Velocity (um/s) (40)
Metabolic Maturation Strategy - Taurine (3)	Upstroke Velocity (um/s) (40)
Metabolic Maturation Strategy - Vitamin B12 (3)	Upstroke Velocity (um/s) (40)
Number of hiPSC Lines - Reported (313)	Upstroke Velocity (um/s) (40)
Pharmacological Interventions - Lidocaine (7)	Upstroke Velocity (um/s) (40)
Pharmacological Interventions - Phenylephrine (3)	Upstroke Velocity (um/s) (40)
Pharmacological Interventions - Propranolol (5)	Upstroke Velocity (um/s) (40)
Pharmacological Interventions - Ranolazine (6)	Upstroke Velocity (um/s) (40)
Pharmacological Interventions - T3 (3)	Upstroke Velocity (um/s) (40)
Purification Duration - 5 days (6)	Upstroke Velocity (um/s) (40)
Purification Duration - 7 days (6)	Upstroke Velocity (um/s) (40)
Purification Stategy - Antibiotic (3)	Upstroke Velocity (um/s) (40)
Purification Stategy - Cell Sorting (7)	Upstroke Velocity (um/s) (40)
Purification Stategy - Media (6)	Upstroke Velocity (um/s) (40)
Resting Membrane Potential (mV) - Q4 (9)	Upstroke Velocity (um/s) (40)
Stress (mN/mm2) - Q4 (9)	Upstroke Velocity (um/s) (40)
Time to Peak (ms) - Q3 (10)	Upstroke Velocity (um/s) (40)
Time to Relaxation (ms) - Q2 (5)	Upstroke Velocity (um/s) (40)
Upstroke Velocity (um/s) - Q1 (10)	Upstroke Velocity (um/s) (40)
Upstroke Velocity (um/s) - Q2 (10)	Upstroke Velocity (um/s) (40)
Upstroke Velocity (um/s) - Q3 (11)	Upstroke Velocity (um/s) (40)
Upstroke Velocity (um/s) - Q4 (9)	Upstroke Velocity (um/s) (40)
Upstroke Velocity (um/s) - Reported (40)	Upstroke Velocity (um/s) (40)
Upstroke Velocity (um/s) Quantiles (40)	Upstroke Velocity (um/s) (40)
Wnt Inhibition Duration - 1 day (12)	Upstroke Velocity (um/s) (40)
Wnt Inhibition Duration - 6 days (4)	Upstroke Velocity (um/s) (40)
Wnt Inhibitor - BMP4 (7)	Upstroke Velocity (um/s) (40)
Wnt Inhibitor - DS-I-7 (11)	Upstroke Velocity (um/s) (40)
Wnt Inhibitor - KY02111 (7)	Upstroke Velocity (um/s) (40)
Wnt Inhibitor - Others (9)	Upstroke Velocity (um/s) (40)
Wnt Inhibitor - bFGF (8)	Upstroke Velocity (um/s) (40)
hiPSC Backbone Media - Differentiation (1)	Upstroke Velocity (um/s) (40)
hiPSC Backbone Media - Specialised (17)	Upstroke Velocity (um/s) (40)
hiPSC Line - 201B6 (3)	Upstroke Velocity (um/s) (40)
hiPSC Line - 201B7 (9)	Upstroke Velocity (um/s) (40)
hiPSC Line - ATCC (5)	Upstroke Velocity (um/s) (40)
hiPSC Line - BJ1 (7)	Upstroke Velocity (um/s) (40)
hiPSC Line - C25 (6)	Upstroke Velocity (um/s) (40)
hiPSC Line - Cor.4U (16)	Upstroke Velocity (um/s) (40)
hiPSC Line - Gibco episomal (10)	Upstroke Velocity (um/s) (40)
hiPSC Line - IMR90 (19)	Upstroke Velocity (um/s) (40)
hiPSC Line - Reported (310)	Upstroke Velocity (um/s) (40)
hiPSC Line - iCell2 (8)	Upstroke Velocity (um/s) (40)
hiPSC-CM Backbone Media - Cor.4U Complete Medium (6)	Upstroke Velocity (um/s) (40)
hiPSC-CM Maintenance/Maturation Media (if different) - DMEM/F12 (6)	Upstroke Velocity (um/s) (40)
hiPSC-CM Maintenance/Maturation Media (if different) - Modified Essential Medium (1)	Upstroke Velocity (um/s) (40)
hiPSC-CM Matrix Coating if Replated - Laminin (5)	Upstroke Velocity (um/s) (40)
hiPSC-CM Matrix Coating if Replated - Specialised (8)	Upstroke Velocity (um/s) (40)
hiPSC-CM Matrix Coating if Replated - Synthemax (3)	Upstroke Velocity (um/s) (40)
hiPSC-CM Media Supplement - Lipid Mix (5)	Upstroke Velocity (um/s) (40)
hiPSC-CM Media Supplement - Nonessential Amino Acids (7)	Upstroke Velocity (um/s) (40)
hiPSC-CM Media Supplement - Selenium (7)	Upstroke Velocity (um/s) (40)
hiPSC-CM Media Supplement - bFGF (3)	Upstroke Velocity (um/s) (40)
