# Supplementary material for: A community-oriented, data-driven resource to improve protocol design for cardiac modelling from human pluripotent stem cells
Source: Research Square preprint supplement (doi:10.21203/rs.3.rs-5017297/v1), 2024-09-27
Supplement: Supplementary file 2 [file b1bdf3e2e52ffc0f9693c0b5.xlsx]

## Sheet: Table
Chen's updated columns	Reference	Publication Year	Title	Journal	DOI	GEO Accession Number	hiPSC Line (Healthy Control)	Number of Healthy Control hiPSC-CM Lines	Sex of hiPSC Line	Ancestry of hiPSC Line	hiPSC Matrix Coating	hiPSC Backbone Media	Confluency at Start of Differentiation (%)	hiPSC-CM Backbone Media	hiPSC-CM Media Supplements	Wnt Activator	Time of Wnt Activator (Start Day - End Day)	Wnt Inhibitor	Time of Wnt Inibitor (Start Day - End Day)	Day Insulin is Added (Until End Unless Noted)	Purification Protocol	Time of hiPSC-CM Purification (Start Day - End Day)	Method to Assess Differentiation Purity	Differentiation Purity (%)	hiPSC-CM Maintenance/Maturation Media (if different)	hiPSC-CM Matrix Coating if Replated	Maturation Technique: Metabolic?	Metabolic Components	Maturation Technique: Electrical Stimulation?	Maturation Technique: Passive Tension?	Maturation Technique: Other Cell Types?	Maturation Technique: Mechanical Stimulation?	Maturation Technique: Cell Alignment?	Maturation Technique: Elastomeric Surface?	Maturation Technique: Cell Derived ECM?	2D: Surface	3D: Platform Type	3D: Cell Types	3D: Type of Stromal Cell (SC)	3D: Types of Endothelial Cell (EC)	3D: Cell Composition (CM-EC-SC)	Tissue Media	Immunofluorescent Imaging?	SEM or TEM	Sarcomere/Cellular Alignment Analysis?	Sarcomere Length (um)	Cell Area (um2)	T-tubules Present?	Contractile Analyses Method
Palpant updated columns	Abecasis, B. et al. Unveiling the molecular crosstalk in a human induced pluripotent stem cell-derived cardiac model. Biotechnol Bioeng 116, 1245–1252 (2019).	2019	Unveiling the molecular crosstalk in a human induced pluripotent stem cell-derived cardiac model	Biotechnol Bioeng 116, 1245–1252 (2019)	https://doi.org/10.1002/bit.26929		DF19-9-11T.H	1	Male	NaN	Matrigel	mTeSR-1	90	RPMI-1640	B27	CHIR99021	0-1	IWR1	2022-03-06	7			Flow cytometry for cTnT+	97							Yes					ECM-coated plastic/glass						RPMI-1640, B27 and EGM2 without supplements	Yes		Yes	1.8
Chen's updated studies	Abilez, O. J. et al. Passive Stretch Induces Structural and Functional Maturation of Engineered Heart Muscle as Predicted by Computational Modeling. Stem Cells 36, 265–277 (2018).	2018	Passive Stretch Induces Structural and Functional Maturation of Engineered Heart Muscle as Predicted by Computational Modeling	Stem Cells 36, 265–277 (2018)	https://doi.org/10.1002/stem.2732		IMR-90	1	Female	NaN	Matrigel	E8	80	RPMI-1640	B27	CHIR99021	0-2	IWR1	2022-03-05	7			Flow cytometry for cTnT+	88		Matrigel				Yes	Yes						Collagen + matrigel	CM + SC	hLF		75, 0, 25		Yes						Force transducer
Cao's 14 Metabolic Maturation Studies	Abulaiti, M. et al. Establishment of a heart-on-a-chip microdevice based on human iPS cells for the evaluation of human heart tissue function. Sci Rep 10, (2020).	2020	Establishment of a heart-on-a-chip microdevice based on human iPS cells for the evaluation of human heart tissue function	Sci Rep 10, (2020)	https://doi.org/10.1038/s41598-020-76062-w		253G1, FF101-s04	2	NaN, NaN	NaN, NaN	Matrigel	StemFit AK02N	100	RPMI-1640	B27, VEGF	Activin A, BMP4, CHIR99021, bFGF	0-5	XAV939, IWP4	2022-05-07				Flow cytometry for cTnT+	37		Matrigel					Yes (not pure)	Flow					Scaffold free	CM + EC + SC	vascular mural cell	vascular endothelial cell	37, 15, 20	α-MEM, FBS, β-mercaptoethanol, VEGF	Yes						Motion tracking analysis
Cao's 2nd Update	Acun, A., Nguyen, T. D. & Zorlutuna, P. In vitro aged, hiPSC-origin engineered heart tissue models with age-dependent functional deterioration to study myocardial infarction. Acta Biomater 94, 372–391 (2019).	2019	In vitro aged, hiPSC-origin engineered heart tissue models with age-dependent functional deterioration to study myocardial infarction	Acta Biomater 94, 372–391 (2019)	https://doi.org/10.1016/j.actbio.2019.05.064		HVRDi007-A, Huv-iPS4F1	2	Male, NaN	NaN, NaN	Geltrex	mTeSR-1		RPMI-1640	B27	CHIR99021	0-1	IWP4	2022-03-05	8			Flow cytometry for cTnT+	93												ECM-coated plastic/glass	GelMA, PEG, PEG/GelMA	CM				RPMI-1640, B27	Yes			1.8	3116		Nanoindenter
Unchanged	Afzal, J. et al. Cardiac ultrastructure inspired matrix induces advanced metabolic and functional maturation of differentiated human cardiomyocytes. Cell Rep 40, (2022).	2022	Cardiac ultrastructure inspired matrix induces advanced metabolic and functional maturation of differentiated human cardiomyocytes	Cell Rep 40, (2022)	https://doi.org/10.1016/j.celrep.2022.111146		WTC11, HF-YK27, PBY4-48D	3	Male, NaN, NaN	Asian, NaN, NaN	Geltrex	E8	82.5	RPMI-1640	B27, L-ascorbic acid, albumin	CHIR99021	0-2	IWR	2022-04-05	10	No glucose with lactate	2022-10-12	Flow cytometry for cTnT+	95	RPMI-1640, B27, lipid-enhanced Cellastium S, L-ascorbic acid	Fibronectin							Yes	Yes		Nanotopography							Yes	TEM					TFM
	Ahrens, J. H. et al. Programming Cellular Alignment in Engineered Cardiac Tissue via Bioprinting Anisotropic Organ Building Blocks. Advanced Materials 34, (2022).	2022	Programming Cellular Alignment in Engineered Cardiac Tissue via Bioprinting Anisotropic Organ Building Blocks	Advanced Materials 34, (2022)	https://doi.org/10.1002/adma.202200217		BJFF	1	NaN	NaN	Matrigel	mTeSR-1	EB	RPMI-1640	B27	CHIR99021	0-2	IWR1	2022-03-05	7	No glucose with lactate	2022-09-11	Flow cytometry for cTnT+	73	High-glucose DMEM, FBS					Yes	Yes						Collagen + fibrin + gelatin	CM + SC	hDF		90, 0, 10	High glucose DMEM, FBS,	Yes		Yes				Post deflection
	Almeida, H. V. et al. Human Extracellular-Matrix Functionalization of 3D hiPSC-Based Cardiac Tissues Improves Cardiomyocyte Maturation. ACS Appl Bio Mater 4, 1888–1899 (2021).	2021	Human Extracellular-Matrix Functionalization of 3D hiPSC-Based Cardiac Tissues Improves Cardiomyocyte Maturation	ACS Appl Bio Mater 4, 1888–1899 (2021)	https://doi.org/10.1021/acsabm.0c01490		DF19-9-11T.H	1	Male	NaN	Matrigel	mTeSR-1	85	RPMI-1640	B27	CHIR99021, Activin A	0-1	IWR1	2023-01-06	8			Flow cytometry for SIRPA+; Flow cytometry for cTnT+; Flow cytometry for VCAM-1+	80											Yes	ECM-coated plastic/glass	Scaffold free	CM			100, 0, 0	RPMI-1640, B27	Yes	SEM, TEM	Yes	1.75			Motion tracking analysis
	Alvarez-Paino, M. et al. Polymer Microparticles with Defined Surface Chemistry and Topography Mediate the Formation of Stem Cell Aggregates and Cardiomyocyte Function. ACS Appl Mater Interfaces 11, 34560–34574 (2019).	2019	Polymer Microparticles with Defined Surface Chemistry and Topography Mediate the Formation of Stem Cell Aggregates and Cardiomyocyte Function	ACS Appl Mater Interfaces 11, 34560–34574 (2019)	https://doi.org/10.1021/acsami.9b04769		REB	1	NaN	NaN	Matrigel	E8		RPMI-1640	B27	Activin A, BMP4	0-2	KY02111, XAV939	2022-02-06	6																CM-aggregates seeded on PLA-based microparticles		CM			100, 0, 0	RPMI-1640, B27							Motion tracking analysis
	Amano, Y. et al. Development of vascularized iPSC derived 3D-cardiomyocyte tissues by filtration Layer-by-Layer technique and their application for pharmaceutical assays. Acta Biomater 33, 110–121 (2016).	2016	Development of vascularized iPSC derived 3D-cardiomyocyte tissues by filtration Layer-by-Layer technique and their application for pharmaceutical assays	Acta Biomater 33, 110–121 (2016)	https://doi.org/10.1016/j.actbio.2016.01.033		253G1	1	NaN	NaN	EBs	mTeSR-1	EB	StemPro-34	L-ascorbic acid, L-glutamine, 1-thioglycerol	Activin A, BMP4, bFGF	0-4	IWR1	2022-04-06				Flow cytometry for cTnT+	53		Fibronectin, Gelatin					Yes						Gelatin	CM + EC + SC	hCF	CMVEC	65, 10, 25	DMEM	Yes						Motion tracking analysis
	Aoyama, J. et al. Spatiotemporal imaging documented the maturation of the cardiomyocytes from human induced pluripotent stem cells. Journal of Thoracic and Cardiovascular Surgery 159, 2260-2271.e7 (2020).	2020	Spatiotemporal imaging documented the maturation of the cardiomyocytes from human induced pluripotent stem cells	Journal of Thoracic and Cardiovascular Surgery 159, 2260-2271.e7 (2020)	https://doi.org/10.1016/j.jtcvs.2019.06.060		454E2	1	NaN	NaN	Matrigel	E8	EB	StemPro-34	L-ascorbic acid, L-glutamine, 1-thioglycerol	Activin A, BMP4, bFGF	0-3	IWR1	2023-03-05							Matrigel										ECM-coated plastic/glass							Yes						Motion tracking analysis
	Arai, K. et al. Fabrication of scaffold-free tubular cardiac constructs using a Bio-3D printer. PLoS One 13, (2018).	2018	Fabrication of scaffold-free tubular cardiac constructs using a Bio-3D printer	PLoS One 13, (2018)	https://doi.org/10.1371/journal.pone.0209162		iCell	1	NaN	NaN				iCell Maintenance Medium	iCell Maintenance Medium (CDI)											Gelatin					Yes						Scaffold free, 3D bioprinted to assemble cardiac spheroids	CM + EC + SC	hDF	HUVEC	50, 25, 25	Same proportion as cells: iCell Maintenance Medium (CDI): EBM-2: FBM-2	Yes						Motion tracking analysis
	Archer, C. R. et al. Characterization and validation of a human 3D cardiac microtissue for the assessment of changes in cardiac pathology. Sci Rep 8, (2018).	2018	Characterization and validation of a human 3D cardiac microtissue for the assessment of changes in cardiac pathology	Sci Rep 8, (2018)	https://doi.org/10.1038/s41598-018-28393-y		iCell	1	NaN	NaN				iCell Maintenance Medium	iCell Maintenance Medium (CDI)						Blasticidin	30-32	Flow cytometry for cTnT+	98		Gelatin										ECM-coated plastic/glass	Scaffold free	CM + EC + SC	hCF	CMVEC	57, 14, 29	50% iCell Maintenance Media (CDI), 50% EBM-2	Yes
	Beauchamp, P. et al. 3D Co-culture of hiPSC-Derived Cardiomyocytes With Cardiac Fibroblasts Improves Tissue-Like Features of Cardiac Spheroids. Front Mol Biosci 7, (2020).	2020	3D Co-culture of hiPSC-Derived Cardiomyocytes With Cardiac Fibroblasts Improves Tissue-Like Features of Cardiac Spheroids	Front Mol Biosci 7, (2020)	https://doi.org/10.3389/fmolb.2020.00014		iCell2, Cor.4U	2	NaN, NaN	NaN, NaN				iCell Maintenance Medium	iCell Maintenance Medium (CDI)											Fibronectin					Yes						Scaffold free	CM + SC	heCF		80, 0, 20	iCell Maintenance Medium (CDI), phenylphrine, L-ascorbic acid	Yes	TEM					Motion tracking analysis
	Beauchamp, P. et al. Development and Characterization of a Scaffold-Free 3D Spheroid Model of Induced Pluripotent Stem Cell-Derived Human Cardiomyocytes. Tissue Eng Part C Methods 21, 852–861 (2015).	2015	Development and Characterization of a Scaffold-Free 3D Spheroid Model of Induced Pluripotent Stem Cell-Derived Human Cardiomyocytes	Tissue Eng Part C Methods 21, 852–861 (2015)	https://doi.org/10.1089/ten.TEC.2014.0376		iCell	1	NaN	NaN				iCell Maintenance Medium	iCell Maintenance Medium (CDI)											Gelatin											Scaffold free	CM			100, 0, 0	DMEM, GlutaMax, FCS, IGF-1	Yes						Motion tracking analysis
	Bekhite, M. M. et al. Longitudinal metabolic profiling of cardiomyocytes derived from human-induced pluripotent stem cells. Basic Res Cardiol 115, (2020).	2020	Longitudinal metabolic profiling of cardiomyocytes derived from human-induced pluripotent stem cells	Basic Res Cardiol 115, (2020)	https://doi.org/10.1007/s00395-020-0796-0		in-house	1	NaN	NaN	Matrigel	E8		RPMI-1640	B27	Activin A, BMP4, CHIR99021		BMP4, IWP-2			No glucose with lactate	21-26	Flow cytometry for a-actinin+	80	RPMI-1640, B27, L-ascorbic acid											ECM-coated plastic/glass							Yes	TEM
	Bhagwan, J. R. et al. Variable expression and silencing of CRISPR-Cas9 targeted transgenes identifies the AAVS1 locus as not an entirely safe harbour. F1000Res 8, 1911 (2019).	2019	Variable expression and silencing of CRISPR-Cas9 targeted transgenes identifies the AAVS1 locus as not an entirely safe harbour	F1000Res 8, 1911 (2019)	https://doi.org/10.12688/f1000research.19894.2		Not listed	1	NaN	NaN	Matrigel	E8		StemPro-34	B27	Activin A, BMP4	0-2	KY02111, XAV939	2022-02-04	4			IHC a-actinin	90		Matrigel										ECM-coated plastic/glass							Yes
	Bhute, V.J. et al. Metabolomics Identifies Metabolic Markers of Maturation in Human Pluripotent Stem Cell-Derived Cardiomyocytes. Theranostics 7, 2078–2091 (2017).	2017	Metabolomics Identifies Metabolic Markers of Maturation in Human Pluripotent Stem Cell-Derived Cardiomyocytes	Theranostics 7, 2078–2091 (2017)	https://doi.org/10.7150/thno.19390		19-9-7	1	NaN	NaN	Matrigel	mTESR-1	Not listed	RPMI-1640	B27	CHIR99021	0-1	IWP2	2024-03-05	6						Matrigel										ECM-coated plastic/glass							Not for hiPSC-CMs				Not for hiPSC-CMs
	Birket, M. J. et al. A Human Stem Cell Model of Fabry Disease Implicates LIMP-2 Accumulation in Cardiomyocyte Pathology. Stem Cell Reports 13, 380–393 (2019).	2019	A Human Stem Cell Model of Fabry Disease Implicates LIMP-2 Accumulation in Cardiomyocyte Pathology	Stem Cell Reports 13, 380–393 (2019)	https://doi.org/10.1016/j.stemcr.2019.07.004		in-house (4)	4	NaN	NaN	Matrigel	mTeSR-1		RPMI-1640	L-ascorbic acid, albumin, bFGF, ITS-X	CHIR99021, BMP4	0-2	Wnt-C59, bFGF	2023-02-04	2	Cell sorting		Flow cytometry for SIRPA+	96	DMEM/F12, BSA, creatine, taurine,L-carnitine, 1-thioglycerol, L-ascorbic acid, Trace Elements A, B, and C, T3, dexamethasone, palmitic acid, FBS	Matrigel	Yes	T3, dexamethasone, palmitic acid								ECM-coated plastic/glass							Yes				1800
	Blazeski, A. et al. Functional Properties of Engineered Heart Slices Incorporating Human Induced Pluripotent Stem Cell-Derived Cardiomyocytes. Stem Cell Reports 12, 982–995 (2019).	2019	Functional Properties of Engineered Heart Slices Incorporating Human Induced Pluripotent Stem Cell-Derived Cardiomyocytes	Stem Cell Reports 12, 982–995 (2019)	https://doi.org/10.1016/j.stemcr.2019.04.002		in-house	1	NaN	NaN	Geltrex	E8	80	RPMI-1640	B27	CHIR99021	0-2	IWR1	2022-03-05	9			Flow cytometry for cTnT+	83											Yes		Decellularized tissue	CM			100, 0, 0	RPMI-1640, B27	Yes		Yes				Motion tracking analysis
	Bliley, J. M. et al. Dynamic loading of human engineered heart tissue enhances contractile function and drives a desmosome-linked disease phenotype. Sci. Transl. Med 13, 1817 (2021).	2021	Dynamic loading of human engineered heart tissue enhances contractile function and drives a desmosome-linked disease phenotype	Sci. Transl. Med 13, 1817 (2021)	https://doi.org/10.1126/scitranslmed.abd1817		in-house	1	NaN	NaN	Geltrex	E8		RPMI-1640	KOSR	CHIR99021, Activin A	0-2	Wnt-C59	2022-02-04		No glucose with lactate	17-21			RPMI-1640, albumin, L-ascorbic acid	Geltrex				Yes	Yes	Yes					Collagen + matrigel	CM + SC	hCF		90, 0, 10	RPMI-1640, KOSR	Yes	TEM	Yes	2			Post deflection; Force transducer
	Blinova, K. et al. Comprehensive translational assessment of human- induced pluripotent stem cell derived cardiomyocytes for evaluating drug-induced arrhythmias. Toxicological Sciences 155, 234–247 (2017).	2017	Comprehensive translational assessment of human- induced pluripotent stem cell derived cardiomyocytes for evaluating drug-induced arrhythmias	Toxicological Sciences 155, 234–247 (2017)	https://doi.org/10.1093/toxsci/kfw200		iCell, Cor.4U	2	NaN, NaN	NaN, NaN				iCell Maintenance Medium	iCell Maintenance Medium (CDI)											Gelatin										MEA
	Blinova, K. et al. International Multisite Study of Human-Induced Pluripotent Stem Cell-Derived Cardiomyocytes for Drug Proarrhythmic Potential Assessment. Cell Rep 24, 3582–3592 (2018).	2018	International Multisite Study of Human-Induced Pluripotent Stem Cell-Derived Cardiomyocytes for Drug Proarrhythmic Potential Assessment	Cell Rep 24, 3582–3592 (2018)	https://doi.org/10.1016/j.celrep.2018.08.079		iCell, Cor.4U	3	NaN, NaN	NaN, NaN				iCell Maintenance Medium	iCell Maintenance Medium (CDI)											Gelatin										ECM-coated plastic/glass
	Block, T. et al. Human perinatal stem cell derived extracellular matrix enables rapid maturation of hiPSC-CM structural and functional phenotypes. Sci Rep 10, (2020).	2020	Human perinatal stem cell derived extracellular matrix enables rapid maturation of hiPSC-CM structural and functional phenotypes	Sci Rep 10, (2020)	https://doi.org/10.1038/s41598-020-76052-y		iCell	1	NaN	NaN				iCell Maintenance Medium	iCell Maintenance Medium (CDI)											Human perinatal ECM (MatrixPlus)									Yes	ECM-coated plastic/glass							Yes		Yes
	Borchert, T. et al. Catecholamine-Dependent b-Adrenergic Signaling in a Pluripotent Stem Cell Model of Takotsubo Cardiomyopathy. J Am Coll Cardiol 70, 965-991 (2017).	2017	Catecholamine-Dependent b-Adrenergic Signaling in a Pluripotent Stem Cell Model of Takotsubo Cardiomyopathy	J Am Coll Cardiol 70, 965-991 (2017)	https://doi.org/10.1016/j.jacc.2017.06.061		in-house	3	NaN	NaN	Geltrex	E8	90	RPMI-1640	L-ascorbic acid, albumin	CHIR99021	0-2	IWP2	2022-03-05	10	No glucose with lactate	30-33	Flow cytometry for cTnT+	90		Gelatin											Collagen	CM + SC	hFF		70, 0, 30	Iscove-Medium, B27, NEAAs, L-glutamine, L-acsorbic acid, IGF1, FGF-2, VEGF, TGFB	Yes
	Branco, M. A. et al. Transcriptomic analysis of 3D Cardiac Differentiation of Human Induced Pluripotent Stem Cells Reveals Faster Cardiomyocyte Maturation Compared to 2D Culture. Sci Rep 9, (2019).	2019	Transcriptomic analysis of 3D Cardiac Differentiation of Human Induced Pluripotent Stem Cells Reveals Faster Cardiomyocyte Maturation Compared to 2D Culture	Sci Rep 9, (2019)	https://doi.org/10.1038/s41598-019-45047-9		DF6-9-9T.B, F002.1A.13, Gibco episomal	3	NaN, NaN, NaN	NaN, NaN, NaN	Matrigel	mTeSR-1	92.5	RPMI-1640	B27	CHIR99021	0-1	IWP4	2022-03-05	7			Flow cytometry for cTnT+	90												ECM-coated plastic/glass	Scaffold free	CM			100, 0, 0	RPMI-1640, B27	Yes		Yes		1500
	Brink, L. van den et al. Cryopreservation of human pluripotent stem cell-derived cardiomyocytes is not detrimental to their molecular and functional properties. Stem Cell Res 43, (2020).	2020	Cryopreservation of human pluripotent stem cell-derived cardiomyocytes is not detrimental to their molecular and functional properties	Stem Cell Res 43, (2020)	https://doi.org/10.1016/j.scr.2019.101698		LUMC0020iCTRL, LUMC0099iCTRL	2	Female	Caucasian	Matrigel	E8		Pluricyte Cardiomyocyte Differentiation Kit (NCardia)	Pluricyte Cardiomyocyte Differentiation Kit (NCardia) or Bovine Serum Albumin (BSA) Polyvinylalchohol Essential Lipids	CHIR99021	0-2	XAV939, IWP-L6	2022-02-04				Flow cytometry for cTnT+	80	Medium C (NCardia)	Matrigel										ECM-coated plastic/glass							Yes						Motion tracking analysis
	Buikema, J. W. et al. Wnt Activation and Reduced Cell-Cell Contact Synergistically Induce Massive Expansion of Functional Human iPSC-Derived Cardiomyocytes. Cell Stem Cell 27, 50-63.e5 (2020).	2020	Wnt Activation and Reduced Cell-Cell Contact Synergistically Induce Massive Expansion of Functional Human iPSC-Derived Cardiomyocytes	Cell Stem Cell 27, 50-63.e5 (2020)	https://doi.org/10.1016/j.stem.2020.06.001		SCVI-111, SCVI-113, SCVI-273, SCVI-202	4	NaN, NaN, NaN, NaN	NaN, NaN, NaN, NaN	Matrigel	E8	100	RPMI-1640	B27	CHIR99021	0-2	Wnt-C59	2022-03-05	7			Flow cytometry for cTnT+	85		Matrigel				Yes						Micropatterned PAA	Fibrin + matrigel	CM			100, 0, 0	DMEM, horse serum, insulin, aprotinin	Yes		Yes				Post deflection
	Burnett, S. D. et al. Population-based toxicity screening in human induced pluripotent stem cell-derived cardiomyocytes. Toxicol Appl Pharmacol 381, (2019).	2019	Population-based toxicity screening in human induced pluripotent stem cell-derived cardiomyocytes	Toxicol Appl Pharmacol 381, (2019)	https://doi.org/10.1016/j.taap.2019.114711		iCell, CDI (42)	43	NaN, Female	NaN, Caucasian				iCell Maintenance Medium	iCell Maintenance Medium (CDI)											Gelatin										ECM-coated plastic/glass
	Cao, Y. et al. Nondestructive nanostraw intracellular sampling for longitudinal cell monitoring. Proc Natl Acad Sci U S A 114, E1866–E1874 (2017).	2017	Nondestructive nanostraw intracellular sampling for longitudinal cell monitoring	Proc Natl Acad Sci U S A 114, E1866–E1874 (2017)	https://doi.org/10.1073/pnas.1615375114		Not listed	1	NaN	NaN																								Yes		Nanotopography								SEM
	Carson, D. et al. Nanotopography-Induced Structural Anisotropy and Sarcomere Development in Human Cardiomyocytes Derived from Induced Pluripotent Stem Cells. ACS Applied Materials and Interfaces 8, 21923–21932 (2016).	2016	Nanotopography-Induced Structural Anisotropy and Sarcomere Development in Human Cardiomyocytes Derived from Induced Pluripotent Stem Cells	ACS Applied Materials and Interfaces 8, 21923–21932 (2016)	https://doi.org/10.1021/acsami.5b11671		IMR-90	1	Female	NaN	Matrigel	KO-DMEM, KOSR, L-glutamine, NEAAs, bFGF, β-mercaptoethanol	100	RPMI-1640	B27	Activin A, BMP4, CHIR 99021	0-5	XAV939	2022-05-07	7			Flow cytometry for cTnT+	80		PUABP-RGD peptides or fibronectin							Yes			Nanotopography							Yes		Yes	1.8
	Cashman, T. J., Josowitz, R., Johnson, B. V., Gelb, B. D. & Costa, K. D. Human engineered cardiac tissues created using induced pluripotent stem cells reveal functional characteristics of BRAF-mediated hypertrophic cardiomyopathy. PLoS One 11, (2016).	2016	Human engineered cardiac tissues created using induced pluripotent stem cells reveal functional characteristics of BRAF-mediated hypertrophic cardiomyopathy	PLoS One 11, (2016)	https://doi.org/10.3389/fcvm.2021.806215		in-house	1	NaN	NaN	MEF feeder cells	DMEM/F12, KSR, MEF-conditioned medium, L-glutamine, NEAAs, β-mercaptoethanol, bFGF	EB	StemPro-34	L-glutamine, 1-thioglycerol, L-ascorbic acid, transferrin	Activin A, BMP4	0-1 (BMP4), 2-4 (both)	IWR1	2023-04-08		Cell sorting									Yes	Yes						Collagen + matrigel	CM + SC	hiPSC-SC		75, 0, 25	NBS							Post deflection
	Chelko, S. P. et al. Therapeutic Modulation of the Immune Response in Arrhythmogenic Cardiomyopathy. Circulation 140, 1491–1505 (2019).	2019	Therapeutic Modulation of the Immune Response in Arrhythmogenic Cardiomyopathy	Circulation 140, 1491–1505 (2019)	https://doi.org/10.1161/CIRCULATIONAHA.119.040676		in-house	2	NaN	NaN	Geltrex	E8	80	RPMI-1640	B27	CHIR99021	0-2	IWR1	2022-03-05	9, not 15-19	No glucose with lactate	15-19				Geltrex										ECM-coated plastic/glass							Yes
	Chen, P. et al. Bioacoustic-enabled patterning of human iPSC-derived cardiomyocytes into 3D cardiac tissue. Biomaterials 131, 47–57 (2017).	2017	Bioacoustic-enabled patterning of human iPSC-derived cardiomyocytes into 3D cardiac tissue	Biomaterials 131, 47–57 (2017)	https://doi.org/10.1016/j.biomaterials.2017.03.037		in-house	1	NaN	NaN	Matrigel	E8	85	RPMI-1640	L-ascorbic acid, albumin	CHIR99021	0-2	Wnt-C59	2022-02-04		No glucose with lactate	2022-08-12	IHC a-actinin	98									Yes				Scaffold free	CM			100, 0, 0	RPMI-1640, L-ascorbic acid, albumin, aprotinin	Yes						Motion tracking analysis
	Chen, T. & Vunjak-Novakovic, G. Human Tissue-Engineered Model of Myocardial Ischemia-Reperfusion Injury. Tissue Eng Part A 25, 711–724 (2019).	2019	Human Tissue-Engineered Model of Myocardial Ischemia-Reperfusion Injury	Tissue Eng Part A 25, 711–724 (2019)	https://doi.org/10.1089/ten.tea.2018.0212		WTC11	1	Male	Asian	Matrigel	mTeSR-1	92.5	RPMI-1640	L-ascorbic acid, albumin	CHIR99021	0-2	Wnt-C59	2022-02-04	12										Yes							Collagen + fibrin	CM			100, 0, 0	RPMI-1640, B27, L-ascorbic acid, aprotinin	Yes						Motion tracking analysis
	Chen, V. C. et al. Development of a scalable suspension culture for cardiac differentiation from human pluripotent stem cells. Stem Cell Res 15, 365–375 (2015).	2015	Development of a scalable suspension culture for cardiac differentiation from human pluripotent stem cells	Stem Cell Res 15, 365–375 (2015)	https://doi.org/10.1016/j.scr.2015.08.002		in-house	1	NaN	NaN	EBs	StemPro hESC SFM, bFGF	EB	RPMI-1640 (with 20-40% conditioned media)	B27	CHIR99021	0-1	IWP4	2022-02-04	4			Flow cytometry for cTnT+	96		Synthemax										ECM-coated plastic/glass							Yes
	Chen, Y., Chan, J. P. Y., Wu, J., Li, R. K. & Santerre, J. P. Compatibility and function of human induced pluripotent stem cell derived cardiomyocytes on an electrospun nanofibrous scaffold, generated from an ionomeric polyurethane composite. J Biomed Mater Res A 110, 1932–1943 (2022).	2022	Compatibility and function of human induced pluripotent stem cell derived cardiomyocytes on an electrospun nanofibrous scaffold, generated from an ionomeric polyurethane composite	J Biomed Mater Res A 110, 1932–1943 (2022)	https://doi.org/10.1002/jbm.a.37428		iCell2	1	NaN	NaN				iCell Maintenance Medium	iCell Maintenance Medium (CDI)											Gelatin							Yes			Electrospun fibers						iCell Maintenance Medium (CDI)	Yes	SEM	Yes		1250
	Cheng, J. et al. An East Asian Common Variant Vinculin P.Asp841His Was Associated With Sudden Unexplained Nocturnal Death Syndrome in the Chinese Han Population. J Am Heart Assoc 6, (2017).	2017	An East Asian Common Variant Vinculin P.Asp841His Was Associated With Sudden Unexplained Nocturnal Death Syndrome in the Chinese Han Population	J Am Heart Assoc 6, (2017)	https://doi.org/10.1161/JAHA.116.005330		iCell	1	NaN	NaN																										ECM-coated plastic/glass
	Chopra, A. et al. Force Generation via β-Cardiac Myosin, Titin, and α-Actinin Drives Cardiac Sarcomere Assembly from Cell-Matrix Adhesions. Dev Cell 44, 87-96.e5 (2018).	2018	Force Generation via β-Cardiac Myosin, Titin, and α-Actinin Drives Cardiac Sarcomere Assembly from Cell-Matrix Adhesions	Dev Cell 44, 87-96.e5 (2018)	https://doi.org/10.1016/j.devcel.2017.12.012		PGP1	1	Male	Caucasian	Matrigel	mTeSR-1		RPMI-1640	B27	CHIR99021	0-1	IWP4	2022-03-05	7	No glucose and lactate	2022-09-11	Flow cytometry for cTnT+	90		Fibronectin										Micropatterned PDMS, Micropatterned PAA	Collagen + fibrin	CM + SC	hMSC		70, 0, 30		Yes		Yes
	Chun, Y. W. et al. Combinatorial polymer matrices enhance in vitro maturation of human induced pluripotent stem cell-derived cardiomyocytes. Biomaterials 67, 52–64 (2015).	2015	Combinatorial polymer matrices enhance in vitro maturation of human induced pluripotent stem cell-derived cardiomyocytes	Biomaterials 67, 52–64 (2015)	https://doi.org/10.1016/j.biomaterials.2015.07.004		CC2	1	NaN	NaN	Matrigel	mTeSR-1		RPMI-1640	B27	Activin A, BMP4, bFGF	0-5			5			Flow cytometry for cTnT+	95	DMEM/F12, FBS, L-glutamine, NEAAs, β-mercaptoethanol	Matrigel, Vitronectin							Yes			Electrospun fibers							Yes						TFM
	Correia, C. et al. 3D aggregate culture improves metabolic maturation of human pluripotent stem cell derived cardiomyocytes. Biotechnol Bioeng 115, 630–644 (2018).	2018	3D aggregate culture improves metabolic maturation of human pluripotent stem cell derived cardiomyocytes	Biotechnol Bioeng 115, 630–644 (2018)	https://doi.org/10.1002/bit.26504		DF19-9-11T.H, UKKi006-A	2	Male, Female	NaN, Caucasian	Matrigel	mTeSR-1	85	RPMI-1640	B27	CHIR99021	0-1	IWR1	2022-01-03	7			Flow cytometry for cTnT+	80		Matrigel										ECM-coated plastic/glass	Scaffold free	CM			100, 0, 0		Yes	TEM		1.5
	Correia, C. et al. Distinct carbon sources affect structural and functional maturation of cardiomyocytes derived from human pluripotent stem cells. Sci Rep 7, (2017).	2017	Distinct carbon sources affect structural and functional maturation of cardiomyocytes derived from human pluripotent stem cells	Sci Rep 7, (2017)	https://doi.org/10.1038/s41598-017-08713-4		DF19-9-11T.H	1	Male	NaN	Matrigel	mTeSR-1	85	RPMI-1640	B27, L-ascorbic acid	CHIR99021, Activin A	0-1	IWR1	2022-01-06	1	No glucose with lactate	15-35	Flow cytometry for cTnT+	80	RPMI-1640 without glucose, B27, L-glutamine, galactose, oleic acid, palmitic acid	Matrigel	Yes	Glutamine, oleic acid, palmitic acid, galactose								ECM-coated plastic/glass							Yes	TEM	Yes				Motion tracking analysis
	Cortes, D. et al. BEaTS-α an open access 3D printed device for in vitro electromechanical stimulation of human induced pluripotent stem cells. Sci Rep 10, (2020).	2020	BEaTS-α an open access 3D printed device for in vitro electromechanical stimulation of human induced pluripotent stem cells	Sci Rep 10, (2020)	https://doi.org/10.1038/s41598-020-67169-1		in-house	1	NaN	NaN			85	RPMI-1640	L-ascorbic acid, albumin	CHIR99021	0-2	Wnt-C59	2022-02-04		No glucose	2022-10-14				Attachment Factor (Thermo)			Yes			Yes				ECM-coated plastic/glass							Yes		Yes	1.9
	Crombie, D. E. et al. Friedreich’s ataxia induced pluripotent stem cell-derived cardio-myocytes display electrophysiological abnormalities and calcium handling deficiency. Aging 9 1440-1449 (2017).	2017	Friedreich’s ataxia induced pluripotent stem cell-derived cardio-myocytes display electrophysiological abnormalities and calcium handling deficiency	Aging 9 1440-1449 (2017)	https://doi.org/10.18632/aging.101247		in-house	1	NaN	NaN	EBs	TeSR-E8		IMDM	L-glutamine, HEPES, NEAAs, human albumin, β-mercaptoethanol, L-ascorbic acid	CHIR99021	0-2	KY02111, XAV939	2022-03-08				IHC: cTnT, cTnI, NKX2-5		IMDM, L-glutamine, HEPES, NEAAs, β-mercaptoethanol	Laminin, Matrigel										ECM-coated plastic/glass							Yes
	Cui, H. et al. 4D physiologically adaptable cardiac patch: A 4-month in vivo study for the treatment of myocardial infarction. Sci Adv 26, (2020).	2020	4D physiologically adaptable cardiac patch: A 4-month in vivo study for the treatment of myocardial infarction	Sci Adv 26, (2020)	https://doi.org/10.1126/sciadv.abb5067		in-house	1	NaN	NaN	Matrigel	E8	85	E8	Chemically Defined Lipid Concentrate	CHIR99021	0-1	IWP2	2023-02-05	7											Yes	Flow	Yes				PEG + ECM	CM + EC + SC	hMSC	HUVEC	33, 33, 33	E8, Chemically Defined Lipid Concentrate: α-MEM, FBS, L-glutamine: Medium 200 and low-serum growth supplement (1:1:1)	Yes
	Cui, N. et al. Doxorubicin-induced cardiotoxicity is maturation dependent due to the shift from topoisomerase IIα to IIβ in human stem cell derived cardiomyocytes. J Cell Mol Med 23, 4627–4639 (2019).	2019	Doxorubicin-induced cardiotoxicity is maturation dependent due to the shift from topoisomerase II? to II? in human stem cell derived cardiomyocytes	J Cell Mol Med 23, 4627–4639 (2019)	https://doi.org/10.1111/jcmm.14346		Cellapy	1	NaN	NaN		PSCeasy culture medium (Cellapy)	85	RPMI-1640	L-ascorbic acid, albumin	CHIR99021	0-2	Wnt-C59	2022-02-04		No glucose	2023-10-15	Flow cytometry for cTnT+	95	RPMI-1640, albumin	Matrigel										ECM-coated plastic/glass							Yes			2.5		Yes
	Cyganek, L. et al. Deep phenotyping of human induced pluripotent stem cell-derived atrial and ventricular cardiomyocytes. JCI Insight 3, (2018).	2018	Deep phenotyping of human induced pluripotent stem cell-derived atrial and ventricular cardiomyocytes	JCI Insight 3, (2018)	https://doi.org/10.1172/jci.insight.99941		UMGi001-A, UMGi005-A, UMGi014-A	3	NaN, Female, NaN	NaN, NaN, NaN	Geltrex	E8	85	RPMI-1640	Glutamax, HEPES, albumin, L-ascorbic acid	CHIR99021	0-2	IWP2	2022-02-04	8, not 15-20	No glucose with lactate	15-20	Flow cytometry for cTnT+	90	RPMI-1640, GlutaMax, HEPES, B27	Geltrex			Yes	Yes	Yes					ECM-coated plastic/glass	Collagen + matrigel	CM + SC	hFF		70, 0, 30	Iscove medium, B27, IGF-1, FGF-2, VEGF, TGFB, L-glutamine, NEAAs	Yes						Post deflection
	Czirok, A. et al. Optical-flow based non-invasive analysis of cardiomyocyte contractility. Sci Rep 7, (2017).	2017	Optical-flow based non-invasive analysis of cardiomyocyte contractility	Sci Rep 7, (2017)	https://doi.org/10.1038/s41598-017-10094-7		in-house	1	NaN	NaN	Matrigel		85	RPMI-1640	L-ascorbic acid, albumin	BIO, bFGF	0-2	Wnt-C59	2022-02-07				Flow cytometry for cTnT+; Flow cytometry for NKX2-5+	85												ECM-coated plastic/glass							Yes						Motion tracking analysis
	Dai, Y. et al. Troponin destabilization impairs sarcomere-cytoskeleton interactions in iPSC-derived cardiomyocytes from dilated cardiomyopathy patients. Sci Rep 10, (2020).	2020	Troponin destabilization impairs sarcomere-cytoskeleton interactions in iPSC-derived cardiomyocytes from dilated cardiomyopathy patients	Sci Rep 10, (2020)	https://doi.org/10.1038/s41598-019-56597-3		in-house	3	NaN	NaN	Matrigel	E8	85	RPMI-1640	B27	CHIR99021	0-2	IWP2	2022-02-04	7			Flow cytometry for cTnT+	90						Yes		Yes				ECM-coated plastic/glass	Collagen	CM			100, 0, 0	Iscove medium, B27, IGF-1, FGF-2, VEGF, TGFB, L-glutamine, NEAAs	Yes		Yes	1.75			Motion tracking analysis
	Daly, A. C., Davidson, M. D. & Burdick, J. A. 3D bioprinting of high cell-density heterogeneous tissue models through spheroid fusion within self-healing hydrogels. Nat Commun 12, (2021).	2021	3D bioprinting of high cell-density heterogeneous tissue models through spheroid fusion within self-healing hydrogels	Nat Commun 12, (2021)	https://doi.org/10.1038/s41467-021-21029-2		iCellA, iCellB	2	NaN, NaN	NaN, NaN				iCell Maintenance Medium	iCell Maintenance Medium (CDI)									97							Yes						3D printing	CM + SC	hMSC		80, 0, 20	iCell Maintenance Medium (CDI)							Motion tracking analysis
	de Lange, W. J. et al. Human iPSC-engineered cardiac tissue platform faithfully models important cardiac physiology. Am J Physiol Heart Circ Physiol 320, H1670–H1686 (2021).	2021	Human iPSC-engineered cardiac tissue platform faithfully models important cardiac physiology	Am J Physiol Heart Circ Physiol 320, H1670–H1686 (2021)	https://doi.org/10.1152/ajpheart.00941.2020		DF19-9-11T.H	1	Male	NaN	Matrigel	StemFlex	100	RPMI-1640	B27	CHIR99021	0-1	IWP4	2022-03-05	7	No glucose with lactate	17-24	Visual Inspection	95		SyntheMax				Yes	Yes						Fibrin	CM + SC	hiPSC-CF		91, 0, 9	High-glucose DMEM, F12, FBS, horse serum, HEPES, NEAAs, sodium pyruvate	Yes					Yes	Force transducer
	De Leeuw, V. C. et al. Going Back and Forth: Episomal Vector Reprogramming of Peripheral Blood Mononuclear Cells to Induced Pluripotent Stem Cells and Subsequent Differentiation into Cardiomyocytes and Neuron-Astrocyte Co-cultures. Cell Reprogram 22, 300–310 (2020).	2020	Going Back and Forth: Episomal Vector Reprogramming of Peripheral Blood Mononuclear Cells to Induced Pluripotent Stem Cells and Subsequent Differentiation into Cardiomyocytes and Neuron-Astrocyte Co-cultures	Cell Reprogram 22, 300–310 (2020)	https://doi.org/10.1089/cell.2020.0040		in-house	1	NaN	NaN	Geltrex	E8		PSC Cardiomyocyte Differentiation Kit (Gibco)	PSC Cardiomyocyte Differentiation Kit (Gibco)	StemCell Differentiation kit	0-4		2022-06-08	8					PSC Cardiomyocyte Differentiation Kit (Gibco) Maintenance media											ECM-coated plastic/glass							Yes
	Depalma, S. J., Davidson, C. D., Stis, A. E., Helms, A. S. & Baker, B. M. Microenvironmental determinants of organized iPSC-cardiomyocyte tissues on synthetic fibrous matrices. Biomater Sci 9, 93–107 (2021).	2021	Microenvironmental determinants of organized iPSC-cardiomyocyte tissues on synthetic fibrous matrices	Biomater Sci 9, 93–107 (2021)	https://doi.org/10.1039/D0BM01247E		PGP1	1	Male	Caucasian		mTeSR-1		RPMI-1640	B27	CHIR99021	0-1	IWP4	2022-03-05	9, not 11-15	No glucose with lactate	2023-11-15				Fibronectin							Yes			Electrospun fibers							Yes		Yes
	Dias, T. P. et al. Biophysical study of human induced Pluripotent Stem Cell-Derived cardiomyocyte structural maturation during long-term culture. Biochem Biophys Res Commun 499, 611–617 (2018).	2018	Biophysical study of human induced Pluripotent Stem Cell-Derived cardiomyocyte structural maturation during long-term culture	Biochem Biophys Res Commun 499, 611–617 (2018)	https://doi.org/10.1016/j.bbrc.2018.03.198		DF6-9-9T.B	1	NaN	NaN	Matrigel	mTeSR-1	95	RPMI-1640	B27	CHIR99021	0-1	IWP4	2022-03-05	7						Matrigel										ECM-coated plastic/glass							Yes		Yes	1.12
	Diez-Cuñado, M. et al. miRNAs that Induce Human Cardiomyocyte Proliferation Converge on the Hippo Pathway. Cell Rep 23, 2168–2174 (2018).	2018	miRNAs that Induce Human Cardiomyocyte Proliferation Converge on the Hippo Pathway	Cell Rep 23, 2168–2174 (2018)	https://doi.org/10.1016/j.celrep.2018.04.049		iCell	1	NaN	NaN				iCell Maintenance Medium	iCell Maintenance Medium (CDI)										IMDM, Ham's-F12, L-glutamine, B27, N-2 supplement, L-ascorbic acid, BSA	Gelatin										ECM-coated plastic/glass
	Dipalo, M. et al. Plasmonic meta-electrodes allow intracellular recordings at network level on high-density CMOS-multi-electrode arrays. Nat Nanotechnol 13, 965–971 (2018).	2018	Plasmonic meta-electrodes allow intracellular recordings at network level on high-density CMOS-multi-electrode arrays	Nat Nanotechnol 13, 965–971 (2018)	https://doi.org/10.1038/s41565-018-0222-z		Cor.4U	1	NaN	NaN				Cor.4U complete medium	Cor.4U complete medium											Geltrex										MEA						Cor.4U complete medium		SEM
	Dou, W. et al. A microdevice platform for characterizing the effect of mechanical strain magnitudes on the maturation of iPSC-Cardiomyocytes. Biosens Bioelectron 175, (2021).	2021	A microdevice platform for characterizing the effect of mechanical strain magnitudes on the maturation of iPSC-Cardiomyocytes	Biosens Bioelectron 175, (2021)	https://doi.org/10.1016/j.bios.2020.112875		iCell2	1	NaN	NaN				iCell Maintenance Medium	iCell Maintenance Medium (CDI)											Fibronectin, Gelatin, Laminin						Yes		Yes		ECM-coated PDMS							Yes		Yes	1.9			TFM
	Dou, W. et al. Label-free conduction velocity mapping and gap junction assessment of functional iPSC-Cardiomyocyte monolayers. Biosens Bioelectron 167, (2020).	2020	Label-free conduction velocity mapping and gap junction assessment of functional iPSC-Cardiomyocyte monolayers	Biosens Bioelectron 167, (2020)	https://doi.org/10.1016/j.bios.2020.112468		iCell2	1	NaN	NaN				iCell Maintenance Medium	iCell Maintenance Medium (CDI)											Fibronectin, Gelatin, Laminin										ECM-coated plastic/glass							Yes						Motion tracking analysis
	Du, D. T. M., Hellen, N., Kane, C. & Terracciano, C. M. N. Action potential morphology of human induced pluripotent stem cell-derived cardiomyocytes does not predict cardiac chamber specificity and is dependent on cell density. Biophys J 108, 1–4 (2015).	2015	Action potential morphology of human induced pluripotent stem cell-derived cardiomyocytes does not predict cardiac chamber specificity and is dependent on cell density	Biophys J 108, 1–4 (2015)	https://doi.org/10.1016/j.bpj.2014.11.008		iCell	1	NaN	NaN				iCell Maintenance Medium	iCell Maintenance Medium (CDI)																					ECM-coated plastic/glass
	Dwenger, M. et al. Chronic optical pacing conditioning of h-iPSC engineered cardiac tissues. J Tissue Eng 10, (2019).	2019	Chronic optical pacing conditioning of h-iPSC engineered cardiac tissues	J Tissue Eng 10, (2019)	https://doi.org/10.1177/2041731419841748		201B6	1	Female	Caucasian	Matrigel	MEF-conditioned medium		RPMI-1640	B27	Activin A, Wnt3a	0-1	BMP4, bFGF	2022-01-05						RPMI-1640, B27, VEGF				Optical pacing	Yes	Yes						Collagen + matrigel	CM + EC + SC	hiPSC-MC	hiPSC-EC	56, 11, 14	DMEM, FBS	Yes		Yes				Force transducer
	Edri, R. et al. Personalized Hydrogels for Engineering Diverse Fully Autologous Tissue Implants. Advanced Materials 31, (2019).	2019	Personalized Hydrogels for Engineering Diverse Fully Autologous Tissue Implants	Advanced Materials 31, (2019)	https://doi.org/10.1002/adma.201803895		in-house	1	NaN	NaN			100	iCell Maintenance Medium	iCell Maintenance Medium (CDI)	CHIR99021	0-1	IWP2	2022-04-05	8			Flow cytometry for cTnT+; Flow cytometry for NKX2-5	70		Matrigel, Gelatin											Decellularized tissue	CM			100, 0, 0	iCell Maintenance Medium (CDI)	Yes
	Edwards, S. L. et al. A Multiwell Cardiac μGMEA Platform for Action Potential Recordings from Human iPSC-Derived Cardiomyocyte Constructs. Stem Cell Reports 11, 522–536 (2018).	2018	A Multiwell Cardiac ?GMEA Platform for Action Potential Recordings from Human iPSC-Derived Cardiomyocyte Constructs	Stem Cell Reports 11, 522–536 (2018)	https://doi.org/10.1016/j.stemcr.2018.06.016		ATCC	1	NaN	NaN	Geltrex	E8		RPMI-1640	B27	CHIR99021	0-2	IWR1	2022-03-05				Flow cytometry for cTnT+	90		Fibronectin										MEA							Yes
	El‐Battrawy, I. et al. Deciphering the pathogenic role of a variant with uncertain significance for short QT and Brugada syndromes using gene‐edited human‐induced pluripotent stem cell‐derived cardiomyocytes and preclinical drug screening. Clin Transl Med 11, (2021).	2021	Deciphering the pathogenic role of a variant with uncertain significance for short QT and Brugada syndromes using gene?edited human?induced pluripotent stem cell?derived cardiomyocytes and preclinical drug screening	Clin Transl Med 11, (2021)	https://doi.org/10.1002/ctm2.646		ipWT1.3/UMGi014-B.3, LHpb-YaabC3, in-house	3	NaN, NaN, NaN	NaN, NaN, NaN	Matrigel	StemMACS iPS-7 Brew XF medium				Yes, Not listed					Metabolic (not specified		Flow cytometry for cTnT+	85												ECM-coated plastic/glass							Yes
	Ellis, B. W. et al. Human Heart Anoxia and Reperfusion Tissue (HEART) Model for the Rapid Study of Exosome Bound miRNA Expression As Biomarkers for Myocardial Infarction. Small 18, (2022).	2022	Human Heart Anoxia and Reperfusion Tissue (HEART) Model for the Rapid Study of Exosome Bound miRNA Expression As Biomarkers for Myocardial Infarction	Small 18, (2022)	https://doi.org/10.1002/smll.202201330		HVRDi007-A	1	Male	NaN	Geltrex	mTeSR-1	95	RPMI-1640	B27, β-mercaptoethanol	CHIR99021	0-1	IWP4	2022-04-06	9											Yes	Flow					Collagen	CM + EC		hiPSC-EC	83, 17, 0	RPMI-1640, B27, β-mercaptoethanol, EGM2	Yes	TEM
	Eng, G. et al. Autonomous beating rate adaptation in human stem cell-derived cardiomyocytes. Nat Commun 7, (2016).	2016	Autonomous beating rate adaptation in human stem cell-derived cardiomyocytes	Nat Commun 7, (2016)	https://doi.org/10.1038/ncomms10312		C2A	1	NaN	NaN	EBs		EB	StemPro-34	L-glutamine, transferrin, L-ascorbic acid, 1-thioglycerol	Activin A, BMP4, bFGF	0-3	XAV939	2023-03-07				Flow cytometry for cTnT+	55	StemPro-34, VEGF, bFGF				Yes								Scaffold free	CM			100, 0, 0	StemPro-34, VEGF, bFGF	Yes	TEM					Motion tracking analysis
	Ergir, E. et al. Generation and maturation of human iPSC-derived 3D organotypic cardiac microtissues in long-term culture. Sci Rep 12, (2022).	2022	Generation and maturation of human iPSC-derived 3D organotypic cardiac microtissues in long-term culture	Sci Rep 12, (2022)	https://doi.org/10.1038/s41598-022-22225-w		DF19-9-7T, WTC11	2	Male, Male	NaN, Asian	Matrigel	E8	100	RPMI-1640	B27	CHIR99021, BMP4	0-1	IWP2	2022-02-04	7			Flow cytometry for cTnT+	82		Matrigel										ECM-coated plastic/glass	Scaffold free	CM				RPMI-1640, B27	Yes	TEM		1.5		Yes	Motion tracking analysis
	Feaster, T. K., Casciola, M., Narkar, A. & Blinova, K. Acute effects of cardiac contractility modulation on human induced pluripotent stem cell–derived cardiomyocytes. Physiol Rep 9, (2021).	2021	Acute effects of cardiac contractility modulation on human induced pluripotent stem cellÃ‚Â–derived cardiomyocytes	Physiol Rep 9, (2021)	https://doi.org/10.14814/phy2.15085		iCell	1	NaN	NaN				RPMI-1640	B27											Gelatin			Calcium concentration					Yes		Thick matrigel							Yes						Motion tracking analysis
	Feric, N. T. et al. Engineered Cardiac Tissues Generated in the Biowire II: A Platform for Human-Based Drug Discovery. Toxicological Sciences 172, 89–97 (2019).	2019	Engineered Cardiac Tissues Generated in the Biowire II: A Platform for Human-Based Drug Discovery	Toxicological Sciences 172, 89–97 (2019)	https://doi.org/10.1093/toxsci/kfz168		iCell	1	NaN	NaN				iCell Maintenance Medium (CDI)	iCell Maintenance Medium (CDI)																						Collagen + fibrin + matrigel	CM + SC	hCF		90, 0, 10	DMEM, FBS							Post deflection
	Feyen, D. A. M. et al. Metabolic Maturation Media Improve Physiological Function of Human iPSC-Derived Cardiomyocytes. Cell Rep 32, (2020).	2020	Metabolic Maturation Media Improve Physiological Function of Human iPSC-Derived Cardiomyocytes	Cell Rep 32, (2020)	https://doi.org/10.1016/j.celrep.2020.107925		SCVI-273, SCVI-15S1, SCVI-113	3	NaN, NaN, NaN	NaN, NaN, NaN	Matrigel	E8	100	RPMI-1640	B27	CHIR99021	0-3	Wnt-C59	2022-03-05	11	No glucose with lactate	13-16	Flow cytometry for cTnT+	95	DMEM without glucose with 3mM glucose, L-lactate, vitamin B12, biotin, creatine monohydrate, taurine, L-carnitine, L-ascorbic acid, NEAAs, Albumax, B27, KOSR	Matrigel	Yes	L-lactate, Vitamin B12, Biotin, Creatine monohydrate, Taurine, L-carnitine, Ascorbic acid, 1x NEAA, Albumax, 1x B27, 1% KOSR		Yes						ECM-coated plastic/glass	Fibrin	CM			100, 0, 0	DMEM without glucose with 3mM glucose, L-lactate, vitamin B12, biotin, creatine monohydrate, taurine, L-carnitine, L-ascorbic acid, NEAAs, Albumax, B27, KOSR	Yes	EM		1.9			TFM
	Finklea, F. B. et al. Engineered cardiac tissue microsphere production through direct differentiation of hydrogel-encapsulated human pluripotent stem cells. Biomaterials 274, (2021).	2021	Engineered cardiac tissue microsphere production through direct differentiation of hydrogel-encapsulated human pluripotent stem cells	Biomaterials 274, (2021)	https://doi.org/10.1016/j.biomaterials.2021.120818		IMR-90, DF19-9-11T.H, SCV-I55, UA16F2	4	Female, Male, NaN, NaN	NaN, NaN, NaN, NaN	Matrigel	E8 or mTESR-1		RPMI-1640	B27	CHIR99021	0-1	IWP2	2022-03-05	7			Flow cytometry for cTnT+; Flow cytometry for MF20	70		Fibronectin						Flow				ECM-coated plastic/glass	PEG + ECM	CM			100, 0, 0	RPMI-1640, B27	Yes	SEM
	Fischer, B. et al. A complete workflow for the differentiation and the dissociation of hiPSC-derived cardiospheres. Stem Cell Res 32, 65–72 (2018).	2018	A complete workflow for the differentiation and the dissociation of hiPSC-derived cardiospheres	Stem Cell Res 32, 65–72 (2018)	https://doi.org/10.1016/j.scr.2018.08.015		UKBi005-A, IBMT1	2	Female, NaN	NaN, NaN	Matrigel	mTeSR-1	EB	Knockout DMEM	Transferrin/selenium, lipid additive	CHIR99021, BMP4	0-1	IWP2	2022-02-03				IHC a-actinin	95		Matrigel										ECM-coated plastic/glass							Yes
	Fleischer, S., Jahnke, H. G., Fritsche, E., Girard, M. & Robitzki, A. A. Comprehensive human stem cell differentiation in a 2D and 3D mode to cardiomyocytes for long-term cultivation and multiparametric monitoring on a multimodal microelectrode array setup. Biosens Bioelectron 126, 624–631 (2019).	2019	Comprehensive human stem cell differentiation in a 2D and 3D mode to cardiomyocytes for long-term cultivation and multiparametric monitoring on a multimodal microelectrode array setup	Biosens Bioelectron 126, 624–631 (2019)	https://doi.org/10.1016/j.bios.2018.https://doi.org/10.061		IMR-90	1	Female	NaN	Matrigel	mTeSR-1	87.5	RPMI-1640	B27, GlutaMax	CHIR98014	0-1	IWP4	2022-03-05				Flow cytometry for cTnT+	90	DMEM/F-12, GlutaMax, NEAAs, FCS, L-ascorbic acid, β-mercaptoethanol												Scaffold free	CM			100, 0, 0	DMEM/F-12, GlutaMax, NEAAs, FCS, L-ascorbic acid, β-mercaptoethanol	Yes			2			Motion tracking analysis
	Floy, M. E. et al. Direct coculture of human pluripotent stem cell-derived cardiac progenitor cells with epicardial cells induces cardiomyocyte proliferation and reduces sarcomere organization. J Mol Cell Cardiol 162, 144–157 (2022).	2022	Direct coculture of human pluripotent stem cell-derived cardiac progenitor cells with epicardial cells induces cardiomyocyte proliferation and reduces sarcomere organization	J Mol Cell Cardiol 162, 144–157 (2022)	https://doi.org/10.1016/j.yjmcc.2021.09.009		WTC11, WTC11, DF19-9-11T.H	3	Male, Male, Male	Asian, Asian, NaN	Matrigel	mTeSR-1	85	RPMI-1640	B27	CHIR99021	0-1	IWP2	2022-03-05				Flow cytometry for cTnT+	85	Advanced DMEM/F12, L-ascorbic acid, GlutaMax	Gelatin					Yes					ECM-coated plastic/glass							Yes			1.4
	Fong, A. H. et al. Three-Dimensional Adult Cardiac Extracellular Matrix Promotes Maturation of Human Induced Pluripotent Stem Cell-Derived Cardiomyocytes. Tissue Eng Part A 22, 1016–1025 (2016).	2016	Three-Dimensional Adult Cardiac Extracellular Matrix Promotes Maturation of Human Induced Pluripotent Stem Cell-Derived Cardiomyocytes	Tissue Eng Part A 22, 1016–1025 (2016)	https://doi.org/10.1089/ten.TEA.2016.0027		WTC11	1	Male	Asian	Matrigel	mTeSR-1	82.5	RPMI-1640	B27	CHIR99021	0-1	IWP2	2022-03-05	7			Flow cytometry for cTnT+	85											Yes		Decellularized tissue	CM			100, 0, 0	RPMI-1640, B27	Yes
	Fukushima, H. et al. Specific induction and long-term maintenance of high purity ventricular cardiomyocytes from human induced pluripotent stem cells. PLoS One 15, (2020).	2020	Specific induction and long-term maintenance of high purity ventricular cardiomyocytes from human induced pluripotent stem cells	PLoS One 15, (2020)	https://doi.org/10.1371/journal.pone.0241287		836B3, 253G1,1201C1	3	NaN, NaN, NaN	NaN, NaN, NaN	Matrigel	MEF-conditioned medium, bFGF	100	RPMI-1640	B27, L-glutamine	Activin A, BMP4, bFGF	0-5	XAV939, IWP4	2022-05-09	7	Cell sorting		Flow cytometry for cTnT+	97		Matrigel, Gelatin										ECM-coated plastic/glass							Yes	TEM		1.91		like structures
	Gao, L. et al. Large Cardiac Muscle Patches Engineered From Human Induced-Pluripotent Stem Cell–Derived Cardiac Cells Improve Recovery From Myocardial Infarction in Swine. Circulation 137, 1712–1730 (2018).	2018	Large Cardiac Muscle Patches Engineered From Human Induced-Pluripotent Stem Cell–Derived Cardiac Cells Improve Recovery From Myocardial Infarction in Swine	Circulation 137, 1712–1730 (2018)	https://doi.org/10.1161/CIRCULATIONAHA.117.030785		in-house	1	NaN	NaN	Matrigel			RPMI-1640	L-ascorbic acid, albumin	CHIR99021	0-2	Unclear	2022-03-05		No glucose with lactate	2022-08-14	Flow cytometry for cTnT+	96						Yes	Yes	Flow					Fibrin	CM + EC + SC	hiPSC-SMC	hiPSC-EC	50, 25, 25		Yes	TEM					Force transducer
	Gao, L. et al. Myocardial Tissue Engineering with Cells Derived from Human-Induced Pluripotent Stem Cells and a Native-Like, High-Resolution, 3-Dimensionally Printed Scaffold. Circ Res 120, 1318–1325 (2017).	2017	Myocardial Tissue Engineering with Cells Derived from Human-Induced Pluripotent Stem Cells and a Native-Like, High-Resolution, 3-Dimensionally Printed Scaffold	Circ Res 120, 1318–1325 (2017)	https://doi.org/10.1161/CIRCRESAHA.116.310277		in-house	1	NaN	NaN	Matrigel			RPMI-1640	B27	CHIR99021	0-1	Not listed	2023-03-05	7, not 20-30	No glucose and lactate	20-30	IHC cTnI, cTnT, a-actinin, cx43, MLC-2v	95		Gelatin					Yes		Yes		Yes		Decellularized ECM, PEG, 3D printing	CM + EC + SC	hiPSC-SMC	hiPSC-EC	50, 25, 25	DMEM, FCS	Yes		Yes				Motion tracking analysis
	Garay, B. I. et al. Dual inhibition of MAPK and PI3K/AKT pathways enhances maturation of human iPSC-derived cardiomyocytes. Stem Cell Reports 17, 2005–2022 (2022).	2022	Dual inhibition of MAPK and PI3K/AKT pathways enhances maturation of human iPSC-derived cardiomyocytes	Stem Cell Reports 17, 2005–2022 (2022)	https://doi.org/10.1016/j.stemcr.2022.07.003	GSE187308	PLZ, MYL2-mEGFP, 19004	3	NaN, NaN, NaN	NaN, NaN, NaN	Matrigel	mTeSR-1	77.5	RPMI-1640	B27	CHIR99021	0-2	IWP2	2022-02-04	6	No glucose with lactate	16-20	Flow cytometry for cTnT+	99		Matrigel							Yes			ECM-coated plastic/glass and Micropatterned polyacrlyamide gels							Yes	TEM	Yes	2	4100	Yes	TFM
	Garbern, J. C. et al. Inhibition of mTOR Signaling Enhances Maturation of Cardiomyocytes Derived from Human-Induced Pluripotent Stem Cells via p53-Induced Quiescence. Circulation 285–300 (2020)	2020	Inhibition of mTOR Signaling Enhances Maturation of Cardiomyocytes Derived from Human-Induced Pluripotent Stem Cells via p53-Induced Quiescence	Circulation 285–300 (2020)	https://doi.org/10.1161/CIRCULATIONAHA.119.044205		BJ RiPS-A, UCSD142i-86-1PS, Gibco episomal	3	NaN, NaN, NaN	NaN, NaN, NaN		StemFlex	75	RPMI-1640	B27	CHIR99021	0-2	IWP4	2022-02-04	7			Flow cytometry for cTnT+	70	RPMI-1640, B27, Torin1		Yes	Torin1					Yes	Yes		Micropatterned gelatin						RPMI-1640, B27	Yes			1.7			Motion tracking analysis
	Garreta, E. et al. Myocardial commitment from human pluripotent stem cells: Rapid production of human heart grafts. Biomaterials 98, 64–78 (2016).	2016	Myocardial commitment from human pluripotent stem cells: Rapid production of human heart grafts	Biomaterials 98, 64–78 (2016)	https://doi.org/10.1016/j.biomaterials.2016.04.003		ESi048-A	1	Female	Caucasian	Matrigel	mTeSR-1		RPMI-1640	B27, L-glutamine, β-mercaptoethanol, NEAAs	CHIR99021	0-1	IWP4	2022-03-05	5												Yes				Decellularized ECM							Yes
	Giacomelli, E. et al. Human-iPSC-Derived Cardiac Stromal Cells Enhance Maturation in 3D Cardiac Microtissues and Reveal Non-cardiomyocyte Contributions to Heart Disease. Cell Stem Cell 26, 862-879.e11 (2020).	2020	Human-iPSC-Derived Cardiac Stromal Cells Enhance Maturation in 3D Cardiac Microtissues and Reveal Non-cardiomyocyte Contributions to Heart Disease	Cell Stem Cell 26, 862-879.e11 (2020)	https://doi.org/10.1016/j.stem.2020.05.004		LUMCi004-A, LUMCi026-A, LUMCi028-A, NCRM-1	4	Female, NaN, Female, Male	Caucasian, NaN, Caucasian, NaN	Matrigel	E8		BPEL medium (BSA with Polyvinyl alcohol Essential Lipids)		Activin A, BMP4, CHIR99021	0-3	XAV939	2023-03-06				Flow cytometry for cTnT+	80		Fibronectin					Yes						Scaffold free	CM + EC + SC	hiPSC-CF	hiPSC-EC	75, 15, 15	BPEL, bFGF, VEGF	Yes	TEM	Yes	1.9		Yes	Motion tracking analysis
	Giacomelli, E. et al. Three-dimensional cardiac microtissues composed of cardiomyocytes and endothelial cells co-differentiated from human pluripotent stem cells. Development (Cambridge) 144, 1008–1017 (2017).	2017	Three-dimensional cardiac microtissues composed of cardiomyocytes and endothelial cells co-differentiated from human pluripotent stem cells	Development (Cambridge) 144, 1008–1017 (2017)	https://doi.org/10.1242/dev.143438		in-house	1	NaN	NaN	Matrigel	E8		BPEL medium (BSA with Polyvinyl alcohol Essential Lipids)		Activin A, BMP4, CHIR99021	0-3	XAV939	2022-03-06		Cell sorting	14	Flow cytometry for VCAM1	79		Fibronectin					Yes						Scaffold free	CM + EC		hiPSC-EC	85, 0, 15	BPEL, VEGF	Yes						Motion tracking analysis
	Goldfracht, I. et al. Engineered heart tissue models from hiPSC-derived cardiomyocytes and cardiac ECM for disease modeling and drug testing applications. Acta Biomater 92, 145–159 (2019).	2019	Engineered heart tissue models from hiPSC-derived cardiomyocytes and cardiac ECM for disease modeling and drug testing applications	Acta Biomater 92, 145–159 (2019)	https://doi.org/10.1016/j.actbio.2019.05.016		in-house	1	NaN	NaN	Matrigel	mTeSR-1	85	RPMI-1640	L-ascorbic acid, albumin	CHIR99021	0-1	Wnt-C59	2022-02-04				Flow cytometry for cTnT+	85								Yes			Yes		Decellularized tissue	CM			100, 0, 0	Iscove medium, FBS, NEAAs, glutamine, β-mercaptoethanol	Yes	TEM
	Goversen, B. et al. A hybrid model for safety pharmacology on an automated patch clamp platform: Using dynamic clamp to join iPSC-derived cardiomyocytes and simulations of Ik1 ion channels in real-time. Front Physiol 8, (2018).	2018	A hybrid model for safety pharmacology on an automated patch clamp platform: Using dynamic clamp to join iPSC-derived cardiomyocytes and simulations of Ik1 ion channels in real-time	Front Physiol 8, (2018)	https://doi.org/10.3389/fphys.2017.01094		Cor.4U	1	NaN	NaN																										ECM-coated plastic/glass
	Guan, G. et al. Engineering hiPSC-CM and hiPSC-EC laden 3D nanofibrous splenic hydrogel for improving cardiac function through revascularization and remuscularization in infarcted heart. Bioact Mater 6, 4415–4429 (2021).	2021	Engineering hiPSC-CM and hiPSC-EC laden 3D nanofibrous splenic hydrogel for improving cardiac function through revascularization and remuscularization in infarcted heart	Bioact Mater 6, 4415–4429 (2021)	https://doi.org/10.1016/j.bioactmat.2021.04.010		ATCC	1	NaN	NaN	SpGel	mTeSR-1		RPMI-1640	L-ascorbic acid, albumin	CHIR99021	0-2	Wnt-C59	2023-02-04				Flow cytometry for CD31+	85		SpGel									Yes		Decellularized ECM, 3D printing	CM + EC		hiPSC-EC	67, 33, 0		Yes	SEM, TEM	Yes
	Guerzoni, L. P. B. et al. A Layer-by-Layer Single-Cell Coating Technique to Produce Injectable Beating Mini Heart Tissues via Microfluidics. Biomacromolecules 20, 3746–3754 (2019).	2019	A Layer-by-Layer Single-Cell Coating Technique to Produce Injectable Beating Mini Heart Tissues via Microfluidics	Biomacromolecules 20, 3746–3754 (2019)	https://doi.org/10.1021/acs.biomac.9b00786		in-house	1	NaN	NaN	MEF feeder cells	ES Cell Medium + 5ng/mL bFGF		StemPro-34	VEGF, bFGF	Activin A, BMP4, bFGF	0-4						Flow cytometry for cTnT+														PEG	CM + SC	hCF		75, 0, 25		Yes
	Guo, J. et al. Elastomer-grafted iPSC-derived micro heart muscles to investigate effects of mechanical loading on physiology. ACS Biomater Sci Eng 7, 2973–2989 (2021).	2021	Elastomer-grafted iPSC-derived micro heart muscles to investigate effects of mechanical loading on physiology	ACS Biomater Sci Eng 7, 2973–2989 (2021)	https://doi.org/10.1021/acsbiomaterials.0c00318		WTC11	1	Male	Asian	Matrigel	E8		RPMI-1640	B27	CHIR99021	0-2	IWP2	2023-02-04	6, not 20-24	No glucose with lactate	20-24	Flow cytometry for cTnT+	86		Matrigel								Yes		ECM-coated PDMS						RPMI-1640, B27, L-ascorbic acid, vitamin B12	Yes		Yes	1.9			Motion tracking analysis
	Guyette, J. P. et al. Bioengineering Human Myocardium on Native Extracellular Matrix. Circ Res 118, 56–72 (2016).	2016	Bioengineering Human Myocardium on Native Extracellular Matrix	Circ Res 118, 56–72 (2016)	https://doi.org/10.1161/CIRCRESAHA.115.306874		BJ-RiPS-1.1	1	NaN	NaN	Matrigel	mTeSR-1		RPMI-1640	B27	CHIR99021	0-2	IWP4	2022-02-05	6			Flow cytometry for cTnT+; For cytometry for a-actinin	85								Yes			Yes		Decellularized tissue	CM			100, 0, 0	RPMI-1640, B27	Yes	TEM					Force transducer
	Han, J., Wu, Q., Xia, Y., Wagner, M. B. & Xu, C. Cell alignment induced by anisotropic electrospun fibrous scaffolds alone has limited effect on cardiomyocyte maturation. Stem Cell Res 16, 740–750 (2016).	2016	Cell alignment induced by anisotropic electrospun fibrous scaffolds alone has limited effect on cardiomyocyte maturation	Stem Cell Res 16, 740–750 (2016)	DOI.org/https://doi.org/10.1016/j.scr.2016.04.014		IMR-90	1	Female	NaN	Matrigel	MEF-conditioned medium, bFGF or E8	85	RPMI-1640	B27	CHIR99021	0-2	Wnt-C59	2022-03-05	5			Flow cytometry for cTnT+			Matrigel										Electrospun fibers							Yes			1.4	1000
	Hart, C. et al. Rapid nanofabrication of nanostructured interdigitated electrodes (NIDES) for long-term in vitro analysis of human induced pluripotent stem cell differentiated cardiomyocytes. Biosensors (Basel) 8, (2018).	2018	Rapid nanofabrication of nanostructured interdigitated electrodes (NIDES) for long-term in vitro analysis of human induced pluripotent stem cell differentiated cardiomyocytes	Biosensors (Basel) 8, (2018)	https://doi.org/10.3390/bios8040088		iCell2	1	NaN	NaN				iCell Maintenance Medium (CDI)												Fibronectin							Yes			MEA
	Hatani, T. et al. Nano-structural analysis of engrafted human induced pluripotent stem cell-derived cardiomyocytes in mouse hearts using a genetic-probe APEX2. Biochem Biophys Res Commun 505, 1251–1256 (2018).	2018	Nano-structural analysis of engrafted human induced pluripotent stem cell-derived cardiomyocytes in mouse hearts using a genetic-probe APEX2	Biochem Biophys Res Commun 505, 1251–1256 (2018)	https://doi.org/10.1016/j.bbrc.2018.https://doi.org/10.020		201B7	1	Female	Caucasian	EBs					BMP4	0-1	IWP3	2022-04-08																	ECM-coated plastic/glass							Yes	SEM, TEM				Yes
	Hellen, N. et al. Proteomic analysis reveals temporal changes in protein expression in human induced pluripotent stem cell-derived cardiomyocytes in vitro. Stem Cells Dev 28, 565–578 (2019).	2019	Proteomic analysis reveals temporal changes in protein expression in human induced pluripotent stem cell-derived cardiomyocytes in vitro	Stem Cells Dev 28, 565–578 (2019)	https://doi.org/10.1089/scd.2018.0210		iCell	1	NaN	NaN				iCell Maintenance Medium (CDI)												Gelatin										ECM-coated plastic/glass							Yes						Motion tracking analysis
	Herron, T. J. et al. Extracellular matrix-mediated maturation of human pluripotent stem cell-derived cardiac monolayer structure and electrophysiological function. Circ Arrhythm Electrophysiol 9, (2016).	2016	Extracellular matrix-mediated maturation of human pluripotent stem cell-derived cardiac monolayer structure and electrophysiological function	Circ Arrhythm Electrophysiol 9, (2016)	https://doi.org/10.1161/CIRCEP.113.003638		iCell	1	NaN	NaN				RPMI-1640	B27											Matrigel, Fibronectin								Yes		ECM-coated PDMS							Yes				3500
	Hildebrandt, M. R. et al. Precision Health Resource of Control iPSC Lines for Versatile Multilineage Differentiation. Stem Cell Reports 13, 1126–1141 (2019).	2019	Precision Health Resource of Control iPSC Lines for Versatile Multilineage Differentiation	Stem Cell Reports 13, 1126–1141 (2019)	https://doi.org/10.1016/j.stemcr.2019.11.003		in-house (3)	3	NaN	NaN	Matrigel	mTeSR-1	85	STEMdiff Cardiomyocyte Differentiation Kit		StemCell Differentiation kit	0-4		2023-06-08	8			Flow cytometry for cTnT+	80	STEMdiff Cardiomyocyte Differentiation Kit											ECM-coated plastic/glass							Yes
	Hoang, P., Jacquir, S., Lemus, S. & Ma, Z. Quantification of Contractile Dynamic Complexities Exhibited by Human Stem Cell-Derived Cardiomyocytes Using Nonlinear Dimensional Analysis. Sci Rep 9, (2019).	2019	Quantification of Contractile Dynamic Complexities Exhibited by Human Stem Cell-Derived Cardiomyocytes Using Nonlinear Dimensional Analysis	Sci Rep 9, (2019)	https://doi.org/10.1038/s41598-019-51197-7		in-house	1	NaN	NaN	Geltrex	E8		RPMI-1640	B27	CHIR99021	0-1	IWP2 or IWP4	2022-02-05	7	No glucose with lactate	2023-12-14														ECM-coated plastic/glass													Motion tracking analysis
	Hofbauer, P. et al. Cardioids reveal self-organizing principles of human cardiogenesis. Cell 184, 3299-3317.e22 (2021).	2021	Cardioids reveal self-organizing principles of human cardiogenesis	Cell 184, 3299-3317.e22 (2021)	https://doi.org/10.1016/j.cell.2021.04.034		WTC11, IMBAi001-A, IMBAi002-A, 178/5	4	Male, Female, Female, Male	Asian, Caucasian, Caucasian, Caucasian	Vitronectin	E8 with BSA, FGF2, TGFβ1	EB	IMDM and F12 Nutrient Mix	Transferrin, 1-thioglycerol, BSA	Activin A, BMP4, CHIR99021, bFGF	0-2	BMP4, bFGF, IWP2	2022-02-06	7			Flow cytometry for cTnI+	90							Yes						Scaffold free	CM + EC + SC	hiPSC-SC	hiPSC-EC		IMDM and F12 nutrient mix, transferrin,thioglycerol-1, BSA, bFGF	Yes	TEM					Motion tracking analysis
	Homma, J., Shimizu, S., Sekine, H., Matsuura, K. & Shimizu, T. A novel method to align cells in a cardiac tissue-like construct fabricated by cell sheet-based tissue engineering. J Tissue Eng Regen Med 14, 944–954 (2020).	2020	A novel method to align cells in a cardiac tissue-like construct fabricated by cell sheet-based tissue engineering	J Tissue Eng Regen Med 14, 944–954 (2020)	https://doi.org/10.1002/term.3074		201B7	1	Female	Caucasian	iMatrix-511	StemFit AK03	EB	DMEM	FBS	Activin A, BMP4, bFGF	0-3	IWR1	2023-03-05		aMHC-Puromycin resistance selection		Flow cytometry for cTnT+	99										Yes			Scaffold free	CM			100, 0, 0	DMEM, FBS	Yes		Yes
	Hookway, T. A. et al. Phenotypic Variation between Stromal Cells Differentially Impacts Engineered Cardiac Tissue Function. Tissue Eng Part A 25, 773–785 (2019).	2019	Phenotypic Variation between Stromal Cells Differentially Impacts Engineered Cardiac Tissue Function	Tissue Eng Part A 25, 773–785 (2019)	https://doi.org/10.1089/ten.TEA.2018.0362	GSE129058	WTC11	1	Male	Asian	Matrigel	mTeSR-1	100	RPMI-1640	B27	CHIR99021	0-1	IWP2	2023-03-05	7, not 20-24	No glucose with lactate	20-24	Flow cytometry for cTnT+	85							Yes						Scaffold free	CM + SC	hCF, hDF, hMSC, hiPSC-CF		75, 0, 25		Yes
	Horikoshi, Y. et al. Fatty acid-treated induced pluripotent stem cell-derived human cardiomyocytes exhibit adult cardiomyocyte-like energy metabolism phenotypes. Cells 8, (2019).	2019	Fatty acid-treated induced pluripotent stem cell-derived human cardiomyocytes exhibit adult cardiomyocyte-like energy metabolism phenotypes	Cells 8, (2019)	https://doi.org/10.3390/cells8091095		1013, H3083	2	NaN, NaN	NaN, NaN	Matrigel	mTeSR-1		RPMI-1640	B27	CHIR99021	0-2	IWP4	2022-03-05	5	No glucose with lactate	20-27	Flow cytometry for cTnT+	98	Glucose free DMEM, 4-(2-hydroxyethyl)-1-piperazineethanesulfonic acid) HEPES, l-carnitine inner salt, creatine, taurine, NEAA, linoleic-oleic acid	Matrigel	Yes	L-carnitine, creatine, taurine, nonessential amino acids, insulin-transferrin-selenium, linoleic-oleic acid								ECM-coated plastic/glass							Yes				6000
	Horváth, A. et al. Low Resting Membrane Potential and Low Inward Rectifier Potassium Currents Are Not Inherent Features of hiPSC-Derived Cardiomyocytes. Stem Cell Reports 10, 822–833 (2018).	2018	Low Resting Membrane Potential and Low Inward Rectifier Potassium Currents Are Not Inherent Features of hiPSC-Derived Cardiomyocytes	Stem Cell Reports 10, 822–833 (2018)	https://doi.org/10.1016/j.stemcr.2018.01.012		C25	1	Female	Caucasian	EBs	FTDA	EB			Activin A, BMP4, bFGF	0-3	DS07	2022-03-07	3										Yes							Fibrin + matrigel	CM			100, 0, 0	DMEM, heat-inactivated horse serum, aprotinin
	Hu, D. et al. Metabolic maturation of human pluripotent stem cell derived cardiomyocytes by inhibition of HIF1α and LDHA. Circ Res 123, 1066–1079 (2018).	2018	Metabolic maturation of human pluripotent stem cellderived cardiomyocytes by inhibition of HIF1α and LDHA	Circ Res 123, 1066–1079 (2018)	https://doi.org/10.1016/j.celrep.2020.107925		BJ RiPS-D	1	NaN	NaN	Matrigel	E8	95	RPMI-1640	GlutaMax, Gem21 NeuroPlex Serum-Free	CHIR99021	0-1	IWP4	2022-03-05	7	No glucose with lactate	2022-10-16	Flow cytometry for cTnT+	90		Matrigel	Yes	Palmitic acid, oleic acid, HIF1α inhibitior chetomin, a selective and potent LDHA inhibitor GSK 2837808A								ECM-coated plastic/glass							Yes	TEM		2.1			Motion tracking analysis
	Huang, C. Y. et al. Enhancement of human iPSC-derived cardiomyocyte maturation by chemical conditioning in a 3D environment. J Mol Cell Cardiol 138, 1–11 (2020).	2020	Enhancement of human iPSC-derived cardiomyocyte maturation by chemical conditioning in a 3D environment	J Mol Cell Cardiol 138, 1–11 (2020)	https://doi.org/10.1016/j.yjmcc.2019.https://doi.org/10.001		in-house	1	NaN	NaN	Geltrex	E8	85	RPMI-1640	B27	CHIR99021	0-2	IWR1	2022-03-05	9			Flow cytometry for cTnT+	92	RPMI-1640, B27, T3, IGF-1, dexamethasone	Geltrex	Yes	Thyroid hormone T3, dexamethasone, IGF-1		Yes	Yes					ECM-coated plastic/glass	Collagen + fibrin	CM + EC + SC	hCF	HUVEC	75, 10, 15	RPMI-1640, B27, T3, IGF-1, dexamethasone	Yes	TEM		1.9		Yes	Post deflection
	Huebsch, N. et al. Automated video-based analysis of contractility and calcium flux in human-induced pluripotent stem cell-derived cardiomyocytes cultured over different spatial scales. Tissue Eng Part C Methods 21, 467–479 (2015).	2015	Automated video-based analysis of contractility and calcium flux in human-induced pluripotent stem cell-derived cardiomyocytes cultured over different spatial scales	Tissue Eng Part C Methods 21, 467–479 (2015)	https://doi.org/10.1089/ten.TEC.2014.0283		WTC11	1	Male	Asian	Matrigel	E8		RPMI-1640	B27	CHIR99021	0-1	IWP2	2022-03-05	7			Flow cytometry for cTnT+	70		Matrigel										ECM-coated plastic/glass													Motion tracking analysis
	Huebsch, N. et al. Metabolically driven maturation of human-induced-pluripotent-stem-cell-derived cardiac microtissues on microfluidic chips. Nat Biomed Eng 6, 372–388 (2022).	2022	Metabolically driven maturation of human-induced-pluripotent-stem-cell-derived cardiac microtissues on microfluidic chips	Nat Biomed Eng 6, 372–388 (2022)	https://doi.org/10.1038/s41551-022-00884-4		WTC11, SCVI-20, SCVI-273, G15.AO	4	Male, NaN, NaN, NaN	Asian, NaN, NaN, NaN	Matrigel	E8	90	RPMI-1640	B27, L-ascorbic acid	CHIR99021	0-1	IWP2	2023-02-04	6	No glucose with lactate	16-18	Flow cytometry for cTnT+	98	Glucose-free RPMI-1640, B-27, galactose, BSA, oleic acid, palmitic acid		Yes	Oleic acid, palmitic acid		Yes	Yes			Yes			Scaffold free	CM + SC	hiPSC-SC		80, 0, 20	Glucose-free RPMI-1640, B-27, glucose, galactose, BSA, oleic acid, palmitic acid	Yes						Post deflection
	Huebsch, N. et al. Miniaturized iPS-Cell-Derived Cardiac Muscles for Physiologically Relevant Drug Response Analyses. Sci Rep 6, (2016).	2016	Miniaturized iPS-Cell-Derived Cardiac Muscles for Physiologically Relevant Drug Response Analyses	Sci Rep 6, (2016)	https://doi.org/10.1038/srep24726		WTC11	1	Male	Asian	Matrigel	E8		RPMI-1640	B27, L-ascorbic acid	CHIR99021	0-1	IWP2	2022-03-05	7, not 20-24	No glucose with lactate	20-24	Flow cytometry for cTnT+	91						Yes	Yes						Scaffold free	CM + SC	hiPSC-SC		50, 0, 50	RPMI-1640, B27, L-ascorbic acid	Yes	SEM	Yes				Force transducer
	Huethorst, E. et al. Customizable, engineered substrates for rapid screening of cellular cues. Biofabrication 12, (2020).	2020	Customizable, engineered substrates for rapid screening of cellular cues	Biofabrication 12, (2020)	https://doi.org/10.1088/1758-5090/ab5d3f		Pluricyte	1	NaN	NaN																Fibronectin							Yes			Nanotopography							Yes						Motion tracking analysis
	Hwang, G. H. et al. Purification of small molecule-induced cardiomyocytes from human induced pluripotent stem cells using a reporter system. J Cell Physiol 232, 3384–3395 (2017).	2017	Purification of small molecule-induced cardiomyocytes from human induced pluripotent stem cells using a reporter system	J Cell Physiol 232, 3384–3395 (2017)	https://doi.org/10.1002/jcp.25783		ATCC	1	NaN	NaN	Matrigel	mTeSR-1		RPMI-1640	B27	CHIR99021	0-1	XAV939, IWP2	2022-03-05	7			Flow cytometry for cTnT+	98		Gelatin										ECM-coated plastic/glass		CM			100, 0, 0		Yes
	Hwang, H. S. et al. Comparable calcium handling of human iPSC-derived cardiomyocytes generated by multiple laboratories. J Mol Cell Cardiol 85, 79–88 (2015).	2015	Comparable calcium handling of human iPSC-derived cardiomyocytes generated by multiple laboratories	J Mol Cell Cardiol 85, 79–88 (2015)	https://doi.org/10.1016/j.yjmcc.2015.05.003		13FLVN0C1, CC2, DF19-9-11T.H	3	NaN, NaN, Male	NaN, NaN, NaN	Matrigel	mTeSR-1	80	RPMI-1640	B27	CHIR99021	0-1	IWP1	2022-03-05	7			Flow cytometry for cTnT+	88		Matrigel										ECM-coated plastic/glass											2000
	Iseoka, H. et al. Pivotal Role of Non-cardiomyocytes in Electromechanical and Therapeutic Potential of Induced Pluripotent Stem Cell-Derived Engineered Cardiac Tissue. Tissue Eng Part A 24, 287–300 (2018).	2018	Pivotal Role of Non-cardiomyocytes in Electromechanical and Therapeutic Potential of Induced Pluripotent Stem Cell-Derived Engineered Cardiac Tissue	Tissue Eng Part A 24, 287–300 (2018)	https://doi.org/10.1089/ten.TEA.2016.0535		253G1	1	NaN	NaN	EBs	MEF-conditioned medium	EB	StemPro-34	L-ascorbic acid, L-glutamine, 1-thioglycerol	Activin A, BMP4, bFGF	0-4	IWR1	2023-04-06				Flow cytometry for cTnT+	92							Yes						Scaffold free	CM + SC	hiPSC-SC		70, 0, 30	DMEM, FBS	Yes						Motion tracking analysis
	Jabbour, R. J. et al. In vivo grafting of large engineered heart tissue patches for cardiac repair. (2021).	2021	In vivo grafting of large engineered heart tissue patches for cardiac repair	.(2021)	https://doi.org/10.1172/jci.insight.144068		IMR-90	1	Female	NaN	Matrigel	mTeSR-1, E8	85	RPMI-1640	B27	CHIR99021	0-2	Wnt-C59	2023-03-04	8	No glucose	2023-11-15	Flow cytometry for cTnT+	97										Yes			Fibrin	CM			100, 0, 0	DMEM, horse serum, insulin, aprotinin	Yes		Yes			Yes	Motion tracking analysis
	Jayne, R. K. et al. Direct laser writing for cardiac tissue engineering: A microfluidic heart on a chip with integrated transducers. Lab Chip 21, 1724–1737 (2021).	2021	Direct laser writing for cardiac tissue engineering: A microfluidic heart on a chip with integrated transducers	Lab Chip 21, 1724–1737 (2021)	https://doi.org/10.1039/D0LC01078B		PGP1	1	Male	Caucasian		mTeSR-1		RPMI-1640	B27	CHIR99021	0-1	IWP4	2023-03-05	7, not 9-13	No glucose with lactate	2022-09-13										Yes					Collagen	CM + SC	hMSC		90, 0, 10	DMEM, FBS, GlutaMax, NEAAs	Yes						MEMS sensor
	Jeziorowska, D. et al. Differential sarcomere and electrophysiological maturation of human iPSC-derived cardiac myocytes in monolayer vs. Aggregation-based differentiation protocols. Int J Mol Sci 18, (2017).	2017	Differential sarcomere and electrophysiological maturation of human iPSC-derived cardiac myocytes in monolayer vs Aggregation-based differentiation protocols	Int J Mol Sci 18, (2017)	https://doi.org/10.3390/ijms18061173		in-house (4)	4	NaN	NaN	EBs, Matrigel	mTeSR-1	2D: 75, 3D: EB	StemPro-34 or RPMI-1640	B27, L-ascorbic acid	Activin A, BMP4, CHIR99021	0-3	IWR1 or IWP2	3-5; 4-8				Flow cytometry for cTnT+	54		Fibronectin										ECM-coated plastic/glass	Scaffold free	CM					Yes		Yes	1.9	2850
	Jha, R. et al. A long non-coding RNA GATA6-AS1 adjacent to GATA6 is required for cardiomyocyte differentiation from human pluripotent stem cells. FASEB Journal 34, 14336–14352 (2020).	2020	A long non-coding RNA GATA6-AS1 adjacent to GATA6 is required for cardiomyocyte differentiation from human pluripotent stem cells	FASEB Journal 34, 14336–14352 (2020)	https://doi.org/10.1096/fj.202000206R		IMR-90, SCVI-273	2	Female, NaN	NaN, NaN	Matrigel	mTeSR-1	85	RPMI-1640	B27	CHIR99021	0-2	IWR1	2023-03-05	5			Flow cytometry for cTnT+; Flow cytometry for a-actinin+	84, 79												ECM-coated plastic/glass							Yes
	Jia, J. et al. Development of peptide-functionalized synthetic hydrogel microarrays for stem cell and tissue engineering applications. Acta Biomater 45, 110–120 (2016).	2016	Development of peptide-functionalized synthetic hydrogel microarrays for stem cell and tissue engineering applications	Acta Biomater 45, 110–120 (2016)	https://doi.org/10.1016/j.actbio.2016.09.006		iCell	1	NaN	NaN				iCell Maintenance Medium (CDI)	iCell Maintenance Medium (CDI)											Gelatin								Yes		Hydrogel							Yes
	Jiang, X. et al. Construction of chamber-specific engineered cardiac tissues in vitro with human iPSC-derived cardiomyocytes and human foreskin fibroblasts. J Biosci Bioeng 132, 198–205 (2021).	2021	Construction of chamber-specific engineered cardiac tissues in vitro with human iPSC-derived cardiomyocytes and human foreskin fibroblasts	J Biosci Bioeng 132, 198–205 (2021)	https://doi.org/10.1016/j.jbiosc.2021.04.012		Not listed	1	NaN	NaN		mTeSR-1	90	RPMI-1640	B27	CHIR99021, rapamycin	0-1	XAY939, KY02111, BMS493	2022-03-07	8, not 10-14	No glucose with lactate	2022-10-14	Flow cytometry for cTnT+	81	DMEM/F12, FBS					Yes	Yes						Collagen + matrigel	CM + SC	hFF, hMSC, hCF		75, 0, 25	DMEM/F12, FBS	Yes						Post deflection
	Jiang, Y. et al. Myocardial repair of bioengineered cardiac patches with decellularized placental scaffold and human-induced pluripotent stem cells in a rat model of myocardial infarction. Stem Cell Res Ther 12, (2021).	2021	Myocardial repair of bioengineered cardiac patches with decellularized placental scaffold and human-induced pluripotent stem cells in a rat model of myocardial infarction	Stem Cell Res Ther 12, (2021)	https://doi.org/10.1186/s13287-020-02066-y		KS1	1	Male	Caucasian-Sardinian	Matrigel	mTeSR-1	75	RPMI-1640	B27	CHIR99021	0-1	IWP2	2023-04-06	8	No glucose with lactate	Unclear													Yes		Decellularized tissue	CM			100, 0, 0	DMEM/F12, FBS	Yes	TEM		1.35
	Jung, G. et al. Time-dependent evolution of functional vs. remodeling signaling in induced pluripotent stem cell-derived cardiomyocytes and induced maturation with biomechanical stimulation. FASEB Journal 30, 1464–1479 (2016).	2016	Time-dependent evolution of functional vs remodeling signaling in induced pluripotent stem cell-derived cardiomyocytes and induced maturation with biomechanical stimulation	FASEB Journal 30, 1464–1479 (2016)	https://doi.org/10.1096/fj.15-280982		in-house	3	NaN	NaN	Matrigel	E8	90	RPMI-1640	B27	CHIR99021	0-2	IWR1	2022-03-04	7	No glucose	2022-10-15				Matrigel										Microgrooves in PDMS							Yes		Yes
	Kaiser, N. J., Kant, R. J., Minor, A. J. & Coulombe, K. L. K. Optimizing Blended Collagen-Fibrin Hydrogels for Cardiac Tissue Engineering with Human iPSC-derived Cardiomyocytes. ACS Biomater Sci Eng 5, 887–899 (2019).	2019	Optimizing Blended Collagen-Fibrin Hydrogels for Cardiac Tissue Engineering with Human iPSC-derived Cardiomyocytes	ACS Biomater Sci Eng 5, 887–899 (2019)	https://doi.org/10.1021/acsbiomaterials.8b01112		Gibco episomal	2	NaN	NaN	Vitronectin			RPMI-1640	B27	CHIR99021	0-3	IWP2		15, not 20-24	No glucose with lactate	20-24	Flow cytometry for cTnT+	45		Matrigel											Collagen + fibrin	CM			100, 0, 0	RPMI-1640, B27, aprotinin	Yes						Force transducer
	Kallepitis, C. et al. Quantitative volumetric Raman imaging of three dimensional cell cultures. Nat Commun 8, (2017).	2017	Quantitative volumetric Raman imaging of three dimensional cell cultures	Nat Commun 8, (2017)	https://doi.org/10.1038/ncomms14843		Gibco episomal	1	NaN	NaN	Matrigel	E8	100	RPMI-1640	B27	CHIR99021	0-1	IWP4	2022-03-05	7, not 9-12	No glucose and lactate	2022-09-12														ECM-coated plastic/glass
	Kawaguchi, S. et al. Intramyocardial Transplantation of Human iPS Cell–Derived Cardiac Spheroids Improves Cardiac Function in Heart Failure Animals. JACC Basic Transl Sci 6, 239–254 (2021).	2021	Intramyocardial Transplantation of Human iPS CellÃ‚Â–Derived Cardiac Spheroids Improves Cardiac Function in Heart Failure Animals	JACC Basic Transl Sci 6, 239–254 (2021)	https://doi.org/10.1016/j.jacbts.2020.11.017		253G4	1	NaN	NaN	Matrigel	StemFit	EB	RPMI-1640	B27	CHIR99021, BMP4		IWR1		7, not 13-17	No glucose with lactate	13-17	Flow cytometry for cTnT+	98	MEM-α, FBS												Scaffold free	CM			100, 0, 0	MEM-α, FBS	Yes						Motion tracking analysis
	Kawai, Y. et al. Scaffold-Free Tubular Engineered Heart Tissue From Human Induced Pluripotent Stem Cells Using Bio-3D Printing Technology in vivo. Front Cardiovasc Med 8, (2022).	2022	Scaffold-Free Tubular Engineered Heart Tissue From Human Induced Pluripotent Stem Cells Using Bio-3D Printing Technology in vivo	Front Cardiovasc Med 8, (2022)	https://doi.org/10.3389/fcvm.2021.806215		253G4	1	NaN	NaN	Matrigel	StemFit	90	RPMI-1640	B27	CHIR99021	0-1	IWR1	2022-03-06		StemFit Media	2022-12-14	Flow cytometry for cTnT+	99	MEM-α, FBS					Yes	Yes						Scaffold free	CM + EC + SC	hDF	HUVEC	50, 25, 25		Yes						Motion tracking analysis
	Kawatou, M. et al. Modelling Torsade de Pointes arrhythmias in vitro in 3D human iPS cell-engineered heart tissue. Nat Commun 8, (2017).	2017	Modelling Torsade de Pointes arrhythmias in vitro in 3D human iPS cell-engineered heart tissue	Nat Commun 8, (2017)	https://doi.org/10.1038/s41467-017-01125-y		836B3, MiraCell® cardiomyocytes from ChiPSC12 Takara Bio Inc)	2	NaN	NaN	Matrigel	MEF-conditioned medium, bFGF		RPMI-1640	B27, L-glutamine	Activin A, BMP4, bFGF	0-5	XAV939, IWP4	2022-01-09	1			Flow cytometry for cTnT+	96		Matrigel, Fibronectin										ECM-coated plastic/glass						MEM-α, FBS, β-mercaptoethanol	Yes
	Kerscher, P. et al. Direct hydrogel encapsulation of pluripotent stem cells enables ontomimetic differentiation and growth of engineered human heart tissues. Biomaterials 83, 383–395 (2016).	2016	Direct hydrogel encapsulation of pluripotent stem cells enables ontomimetic differentiation and growth of engineered human heart tissues	Biomaterials 83, 383–395 (2016)	https://doi.org/10.1016/j.biomaterials.2015.12.011		IMR-90, DF19-9-11T.H	2	Female, Male	NaN, NaN	Matrigel	mTeSR-1		RPMI-1640	B27	CHIR99021	0-1	IWP2	2022-03-05	7			Flow cytometry for cTnT+	74													PEG + ECM	CM			100, 0, 0	RPMI-1640, B27	Yes	TEM	Yes	1.8	2163	Yes	Motion tracking analysis
	Khan, M. et al. Evaluation of changes in morphology and function of human induced pluripotent stem cell derived cardiomyocytes (hiPSC-CMs) cultured on an aligned-nanofiber cardiac patch. PLoS One 10, (2015).	2015	Evaluation of changes in morphology and function of human induced pluripotent stem cell derived cardiomyocytes (hiPSC-CMs) cultured on an aligned-nanofiber cardiac patch	PLoS One 10, (2015)	https://doi.org/10.1371/journal.pone.0126338		iCell	1	NaN	NaN				iCell Maintenance Medium (CDI)												Gelatin							Yes			Electrospun fibers							Yes	SEM, TEM		1.7
	King, O. et al. Functional microvascularization of human myocardium in vitro. Cell Reports Methods 2, (2022).	2022	Functional microvascularization of human myocardium in vitro	Cell Reports Methods 2, (2022)	https://doi.org/10.1016/j.crmeth.2022.100280		WTC11	1	Male	Asian	Matrigel	E8	95	RPMI-1640	B27	CHIR99021	0-2	Wnt-C59	2023-03-05	9	No glucose	2023-11-15				Matrigel					Yes	Flow					Fibrin	CM + EC + SC	hCF	CMVEC	47.6,47.6,4.8	50% microvascular endothelial growth media, 50% high glucose DMEM, FBS, insulin, aprotinin	Yes						Motion tracking analysis
	Kit-Anan, W. et al. Multiplexing physical stimulation on single human induced pluripotent stem cell-derived cardiomyocytes for phenotype modulation. Biofabrication 13, (2021).	2021	Multiplexing physical stimulation on single human induced pluripotent stem cell-derived cardiomyocytes for phenotype modulation	Biofabrication 13, (2021)	https://doi.org/10.1088/1758-5090/abce0a		Gibco episomal	1	NaN	NaN	Matrigel	E8	85	RPMI-1640	B27	CHIR99021	0-2	Wnt-C59	2023-03-05	7	No glucose with lactate		Flow cytometry for cTnT+			PAAm-co-PAAc							Yes	Yes		Micropatterned PAA							Yes		Yes	1.75
	Knight, W. E. et al. Maturation of Pluripotent Stem Cell-Derived Cardiomyocytes Enables Modeling of Human Hypertrophic Cardiomyopathy. Stem Cell Reports 16, 519–533 (2021).	2021	Maturation of Pluripotent Stem Cell-Derived Cardiomyocytes Enables Modeling of Human Hypertrophic Cardiomyopathy	Stem Cell Reports 16, 519–533 (2021)	https://doi.org/10.1016/j.stemcr.2021.01.018		CUSO-1, CUSO-2	2	NaN, NaN	NaN, NaN		mTeSR-1		RPMI-1640	B27	CHIR99021	0-1	IWP2	2022-03-05	7, not 20-25	No glucose with lactate	20-25			Glucose-free RPMI-1640, B-27, galactose, BSA, oleic acid, palmitic acid	Fibronectin	Yes	Palmitic acid, oleic acid, galactose					Yes			Micropatterned plastic/glass							Yes	TEM	Yes	1.75	2000		Force transducer
	Kofron, C. M. et al. A predictive in vitro risk assessment platform for pro-arrhythmic toxicity using human 3D cardiac microtissues. Sci Rep 11, (2021).	2021	A predictive in vitro risk assessment platform for pro-arrhythmic toxicity using human 3D cardiac microtissues	Sci Rep 11, (2021)	https://doi.org/10.1038/s41598-021-89478-9		Gibco episomal	1	NaN	NaN				RPMI-1640	B27	CHIR99021	0-2	IWP2	2-?	7, not 13-17	No glucose with lactate	13-17	Flow cytometry for cTnT+	84		Matrigel			Yes		Yes						Scaffold free	CM + SC	hCF		95, 0, 5	RPMI-1640, B27, FBS	Yes
	Kolanowski, T. J. et al. Enhanced structural maturation of human induced pluripotent stem cell-derived cardiomyocytes under a controlled microenvironment in a microfluidic system. Acta Biomater 102, 273–286 (2020).	2020	Enhanced structural maturation of human induced pluripotent stem cell-derived cardiomyocytes under a controlled microenvironment in a microfluidic system	Acta Biomater 102, 273–286 (2020)	https://doi.org/10.1016/j.actbio.2019.11.044		iWT.D2.1/2.3, UMGi005-A	2	NaN, NaN	NaN, NaN	Geltrex	E8	90	RPMI-1640	HEPES, GlutaMax, L-ascorbic acid, albumin	CHIR99021	0-2	IWP2	2022-02-04	6			Flow cytometry for cTnT+	90	RPMI-1640, HEPES, GlutaMax, B27	Geltrex						Flow				Silicon membrane, microfluidic device							Yes		Yes	1.9	3750		Motion tracking analysis
	Kroll, K. et al. Electro-mechanical conditioning of human iPSC-derived cardiomyocytes for translational research. Prog Biophys Mol Biol 130, 212–222 (2017).	2017	Electro-mechanical conditioning of human iPSC-derived cardiomyocytes for translational research	Prog Biophys Mol Biol 130, 212–222 (2017)	https://doi.org/10.1016/j.pbiomolbio.2017.07.003		Cor.4U	1	NaN	NaN				Cor.4U complete medium												Fibronectin			Yes			Yes		Yes		ECM-coated PDMS							Yes			1.45
	Kujala, V. J., Pasqualini, F. S., Goss, J. A., Nawroth, J. C. & Parker, K. K. Laminar ventricular myocardium on a microelectrode array-based chip. J Mater Chem B 4, 3534–3543 (2016).	2016	Laminar ventricular myocardium on a microelectrode array-based chip	J Mater Chem B 4, 3534–3543 (2016)	https://doi.org/10.1039/c6tb00324a		Cor.4U	1	NaN	NaN				Cor.4U complete medium							Cell sorting					Fibronectin							Yes			MEA, Microgrooves							Yes		Yes
	Kumar, N. et al. Scalable Biomimetic Coaxial Aligned Nanofiber Cardiac Patch: A Potential Model for “Clinical Trials in a Dish”. Front Bioeng Biotechnol 8, (2020).	2020	Scalable Biomimetic Coaxial Aligned Nanofiber Cardiac Patch: A Potential Model for Ã‚Â“Clinical Trials in a DishÃ‚Â”	Front Bioeng Biotechnol 8, (2020)	https://doi.org/10.3389/fbioe.2020.567842		iCell	1	NaN	NaN				iCell Maintenance Medium (CDI)												Fibronectin							Yes			Electrospun fibers							Yes	SEM					Motion tracking analysis
	Kurokawa, Y. K., Shang, M. R., Yin, R. T. & George, S. C. Modeling trastuzumab-related cardiotoxicity in vitro using human stem cell-derived cardiomyocytes. Toxicol Lett 285, 74–80 (2018).	2018	Modeling trastuzumab-related cardiotoxicity in vitro using human stem cell-derived cardiomyocytes	Toxicol Lett 285, 74–80 (2018)	https://doi.org/10.1016/j.toxlet.2018.01.001		WTC11	1	Male	Asian	Matrigel	E8	85	RPMI-1640	B27	CHIR99021	0-2	IWP2	2022-03-05	7, not 13-21	No glucose with lactate	13-21	Flow cytometry for cTnT+	95		Matrigel										ECM-coated plastic/glass							Yes
	LaBarge, W. et al. Maturation of three-dimensional, hiPSC-derived cardiomyocyte spheroids utilizing cyclic, uniaxial stretch and electrical stimulation. PLoS One 14, (2019).	2019	Maturation of three-dimensional, hiPSC-derived cardiomyocyte spheroids utilizing cyclic, uniaxial stretch and electrical stimulation	PLoS One 14, (2019)	https://doi.org/10.1371/journal.pone.0219442		in-house	1	NaN	NaN				RPMI-1640	B27	CHIR99021	0-1	IWR1	2022-02-04	4	No glucose with lactate	10-12, 13-16							Yes			Yes					Scaffold free	CM			100, 0, 0	RPMI-1640, B27	Yes	SEM, TEM
	Lam, Y. Y. et al. Single-cell transcriptomics of engineered cardiac tissues from patient-specific induced pluripotent stem cell–derived cardiomyocytes reveals abnormal developmental trajectory and intrinsic contractile defects in hypoplastic right heart syndrome. J Am Heart Assoc 9, (2020).	2020	Single-cell transcriptomics of engineered cardiac tissues from patient-specific induced pluripotent stem cellÃ‚Â–derived cardiomyocytes reveals abnormal developmental trajectory and intrinsic contractile defects in hypoplastic right heart syndrome	J Am Heart Assoc 9, (2020)	https://doi.org/10.1161/JAHA.120.016528		in-house (6)	6	NaN	NaN	EBs	E8	EB	StemPro-34	L-ascorbic acid, GlutaMax	Activin A, BMP4	0-1	IWR1	2022-03-07	14			Flow cytometry for cTnT+	60						Yes	Yes		Yes	Yes		Microgrooves	Collagen + matrigel	CM + SC	hFF		91, 0, 9	High‐glucose DMEM, neonatal calf serum	Yes						Post deflection
	Lauschke, K. et al. Creating a human-induced pluripotent stem cell-based NKX2.5 reporter gene assay for developmental toxicity testing. Arch Toxicol 95, 1659–1670 (2021).	2021	Creating a human-induced pluripotent stem cell-based NKX2.5 reporter gene assay for developmental toxicity testing	Arch Toxicol 95, 1659–1670 (2021)	https://doi.org/10.1007/s00204-021-03018-y		BIONi010-C	1	Male	Black or African-American	Matrigel then EBs	mTeSR-1	EB	Knockout DMEM	L-ascrobic acid, TS (sodium selenite, transferrin)	Activin A, BMP4, CHIR99021, bFGF	0-1	Wnt-C59	2023-02-03																														Motion tracking analysis
	Lee, S. et al. Contractile force generation by 3D hiPSC-derived cardiac tissues is enhanced by rapid establishment of cellular interconnection in matrix with muscle-mimicking stiffness. Biomaterials 131, 111–120 (2017).	2017	Contractile force generation by 3D hiPSC-derived cardiac tissues is enhanced by rapid establishment of cellular interconnection in matrix with muscle-mimicking stiffness	Biomaterials 131, 111–120 (2017)	https://doi.org/10.1016/j.biomaterials.2017.03.039		in-house	1	NaN	NaN	Matrigel	E8	85	RPMI-1640	L-ascorbic acid, albumin	CHIR99021	0-2	Wnt-C59	2022-02-04		No glucose with lactate	2022-08-12												Yes			PEG + ECM	CM			100, 0, 0	RPMI-1640, L-ascorbic acid, albumin	Yes						Motion tracking analysis
	Lee, S. et al. Ultrasoft electronics to monitor dynamically pulsing cardiomyocytes. Nat Nanotechnol 14, 156–160 (2019).	2019	Ultrasoft electronics to monitor dynamically pulsing cardiomyocytes	Nat Nanotechnol 14, 156–160 (2019)	https://doi.org/10.1038/s41565-018-0331-8		201B7	1	Female	Caucasian	EBs	mTeSR-1	EB	StemPro-34	L-ascorbic acid, L-glutamine, 1-thioglycerol	Activin A, BMP4, bFGF	0-4	IWR1	2022-04-06														Yes	Yes		Electrospun fibers						DMEM, FBS, aprotinin							Motion tracking analysis
	Lemme, M. et al. Chronic intermittent tachypacing by an optogenetic approach induces arrhythmia vulnerability in human engineered heart tissue. Cardiovasc Res 116, 1487–1499 (2020).	2020	Chronic intermittent tachypacing by an optogenetic approach induces arrhythmia vulnerability in human engineered heart tissue	Cardiovasc Res 116, 1487–1499 (2020)	https://doi.org/10.1093/cvr/cvz245		UKE-1	1	NaN	NaN	Geltrex then EBs	FTDA	EB	RPMI-1640	Polyvinyl alcohol, HEPES, human serum albumin, L-ascorbic acid, transferrin–selenium, lipid mix	Activin A, BMP4, bFGF	0-3	XAV939	2023-03-10	6			Flow cytometry for cTnT+	92	RPMI-1640, B27, HEPES, 1-Thioglycerol				Yes	Yes							Fibrin	CM			100, 0, 0	DMEM, heat-inactivated horse serum, aprotinin, insulin	Yes						Post deflection
	Lemoine, M. D. et al. Human Induced Pluripotent Stem Cell-Derived Engineered Heart Tissue as a Sensitive Test System for QT Prolongation and Arrhythmic Triggers. Circ Arrhythm Electrophysiol 11, (2018).	2018	Human Induced Pluripotent Stem Cell-Derived Engineered Heart Tissue as a Sensitive Test System for QT Prolongation and Arrhythmic Triggers	Circ Arrhythm Electrophysiol 11, (2018)	https://doi.org/10.1161/CIRCEP.117.006035		C25, ERC018, iCell2	3	Female, Female, NaN	Caucasian, Caucasian, NaN	Geltrex then EBs	FTDA		RPMI-1640	Polyvinyl alcohol, HEPES, human serum albumin, L-ascorbic acid, transferrin–selenium, lipid mix	CHIR99021	0-2	IWR1	2022-03-04	7, not 10-13	1-Thioglycerol	2022-10-13			RPMI-1640, B27, HEPES, 1-Thioglycerol					Yes							Fibrin	CM			100, 0, 0	DMEM, heat-inactivated horse serum, aprotinin, insulin
	Lemoine, M. D. et al. Human iPSC-derived cardiomyocytes cultured in 3D engineered heart tissue show physiological upstroke velocity and sodium current density. Sci Rep 7, (2017).	2017	Human iPSC-derived cardiomyocytes cultured in 3D engineered heart tissue show physiological upstroke velocity and sodium current density	Sci Rep 7, (2017)	https://doi.org/10.1038/s41598-017-05600-w		C25	1	Female	Caucasian	Geltrex then EBs	FTDA, polyvinyl alcohol	EB	RPMI-1640	Polyvinyl alcohol, HEPES, human serum albumin, L-ascorbic acid, transferrin–selenium, lipid mix	Activin A, BMP4, bFGF	0-3	DS-I-7	2023-03-10	6					RPMI-1640, B27, HEPES, 1-Thioglycerol					Yes							Fibrin + matrigel	CM			100, 0, 0	DMEM, heat-inactivated horse serum, aprotinin, insulin	Yes
	Leonard, A. et al. Afterload promotes maturation of human induced pluripotent stem cell derived cardiomyocytes in engineered heart tissues. J Mol Cell Cardiol 118, 147–158 (2018).	2018	Afterload promotes maturation of human induced pluripotent stem cell derived cardiomyocytes in engineered heart tissues	J Mol Cell Cardiol 118, 147–158 (2018)	https://doi.org/10.1016/j.yjmcc.2018.03.016		IMR-90	1	Female	NaN	Matrigel	mTeSR-1		RPMI-1640	B27	Activin A, BMP4, CHIR99021	0-3	XAV939	2022-03-05	7			Flow cytometry for cTnT+	90		Matrigel				Yes	Yes						Fibrin	CM + SC	hMSC		91, 0, 9	RPMI-1640, B27, aminocaproic acid	Yes	TEM		1.8	350?		Post deflection; Force transducer
	Lewandowski, J. et al. The impact of in vitro cell culture duration on the maturation of human cardiomyocytes derived from induced pluripotent stem cells of myogenic origin. Cell Transplant 27, 1047–1067 (2018).	2018	The impact of in vitro cell culture duration on the maturation of human cardiomyocytes derived from induced pluripotent stem cells of myogenic origin	Cell Transplant 27, 1047–1067 (2018)	https://doi.org/10.1177/0963689718779346		SMiPSC 194	1	NaN	NaN	Geltrex	E8	90; 70	RPMI-1640 or PSC Cardiomyocyte Differentiation Kit (Life Technologies)	B27, L-glutamine	CHIR99021, BMP4	0-3; 0-2	IWR1	3-7; 2-4	7, not 12-16	No glucose with lactate	2023-12-16	Flow cytometry for cTnT+	71												ECM-coated plastic/glass							Yes		Yes	1.7	1752
	Li, J. et al. Extracellular recordings of patterned human pluripotent stem cell-derived cardiomyocytes on aligned fibers. Stem Cells Int 2016, (2016).	2016	Extracellular recordings of patterned human pluripotent stem cell-derived cardiomyocytes on aligned fibers	Stem Cells Int 2016, (2016)	https://doi.org/10.1155/2016/2634013		IMR-90, iCell	2	Female, NaN	NaN, NaN			EB	IMDM	NEAA, L-glutamine, β-mercaptoethanol, BSA or iCell maintenance media (CDI)	CHIR99021, BIO	0-3	KY02111, XAV939	2022-03-09							Gelatin							Yes			Electrospun fibers							Yes	TEM
	Li, J. et al. Human Pluripotent Stem Cell-Derived Cardiac Tissue-like Constructs for Repairing the Infarcted Myocardium. Stem Cell Reports 9, 1546–1559 (2017).	2017	Human Pluripotent Stem Cell-Derived Cardiac Tissue-like Constructs for Repairing the Infarcted Myocardium	Stem Cell Reports 9, 1546–1559 (2017)	https://doi.org/10.1016/j.stemcr.2017.09.007		253G1, 201B7	2	NaN, Female	NaN, Caucasian			EB	IMDM	NEAA, L-glutamine, β-mercaptoethanol, BSA or iCell maintenance media (CDI)	CHIR99021	0-2	KY02111	2022-03-09							Gelatin										Electrospun fibers							Yes	SEM, TEM
	Li, J. et al. Scaffold-Mediated Developmental Effects on Human Induced Pluripotent Stem Cell-Derived Cardiomyocytes Are Preserved After External Support Removal. Front Cell Dev Biol 9, (2021).	2021	Scaffold-Mediated Developmental Effects on Human Induced Pluripotent Stem Cell-Derived Cardiomyocytes Are Preserved After External Support Removal	Front Cell Dev Biol 9, (2021)	https://doi.org/10.3389/fcell.2021.591754		201B7	1	Female	Caucasian		StemFit AK02		Cardiomyocyte Differentiation Kit (Gibco)		StemCell Differentiation kit	0-4		2022-06-08	7, not 14-22	No glucose with lactate	14-22				Gelatin							Yes			Electrospun fibers							Yes		Yes				Motion tracking analysis
	Lin, B. et al. Culture in glucose-depleted medium supplemented with fatty acid and 3,3’,5-Triiodo-L-thyronine facilitates purification and maturation of human pluripotent stem cell-derived cardiomyocytes. Front Endocrinol (Lausanne) 8, (2017).	2017	Culture in glucose-depleted medium supplemented with fatty acid and 3,3’,5-Triiodo-L-thyronine facilitates purification and maturation of human pluripotent stem cell-derived cardiomyocytes	Front Endocrinol (Lausanne) 8, (2017)	https://doi.org/10.3389/fendo.2017.00253		BJ1, NCRM-1	2	Male, Male	NaN, NaN			85			CHIR99021	0-1	IWP2	2023-03-05		No glucose with lactate, fatty acid + T3	13-21	Flow cytometry for cTnT+	95	M199, FBS		Yes	1× Linoleic Acid-Oleic Acid-Albumin, T3, lactate								ECM-coated plastic/glass							Yes		Yes	1.7
	Lin, B. et al. Modeling and study of the mechanism of dilated cardiomyopathy using induced pluripotent stem cells derived from individuals with duchenne muscular dystrophy. DMM Disease Models and Mechanisms 8, 457–466 (2015).	2015	Modeling and study of the mechanism of dilated cardiomyopathy using induced pluripotent stem cells derived from individuals with duchenne muscular dystrophy	DMM Disease Models and Mechanisms 8, 457–466 (2015)	https://doi.org/10.1242/dmm.019505		in-house	2	NaN	NaN	MEF feeder cells	DMEM/F12, KSR, L-glutamine, NEAAs, β-mercaptoethanol, bFGF	EB	StemPro-34		BMP4	0-1	BPM4, bFGF, Activin A	2022-01-04				Flow cytometry for cTnT+														Scaffold free	CM			100, 0, 0	StemPro-34, XAV939	Yes
	Lind, J. U. et al. Instrumented cardiac microphysiological devices via multimaterial three-dimensional printing. Nat Mater 16, 303–308 (2017).	2017	Instrumented cardiac microphysiological devices via multimaterial three-dimensional printing	Nat Mater 16, 303–308 (2017)	https://doi.org/10.1038/nmat4782		Cor.4U	1	NaN	NaN																Fibronectin							Yes	Yes		Microgrooves, hydrogel							Yes		Yes	1.8			Force transducer
	Liu, T. et al. A net-shaped multicellular formation facilitates the maturation of hPSC-derived cardiomyocytes through mechanical and electrophysiological stimuli. Aging 10, 532–548 (2018).	2018	A net-shaped multicellular formation facilitates the maturation of hPSC-derived cardiomyocytes through mechanical and electrophysiological stimuli	Aging 10, 532–548 (2018)	https://doi.org/10.18632/aging.101411		Cellapy	1	NaN	NaN	Matrigel	E8	80	RPMI-1640	B27	CHIR99021	0-2	IWP2	2022-04-06	7			Flow cytometry for cTnT+	88												ECM-coated plastic/glass							Yes	TEM		1.4	2900		Motion tracking analysis
	Ma, R. et al. Electrical Stimulation Enhances Cardiac Differentiation of Human Induced Pluripotent Stem Cells for Myocardial Infarction Therapy. Antioxid Redox Signal 28, 371–384 (2018).	2018	Electrical Stimulation Enhances Cardiac Differentiation of Human Induced Pluripotent Stem Cells for Myocardial Infarction Therapy	Antioxid Redox Signal 28, 371–384 (2018)	https://doi.org/10.1089/ars.2016.6766		Gibco episomal	1	NaN	NaN	Vitronectin then EBs	E8	EB	High-glucose DMEM	NEAAs, L-glutamine, β-mercaptoethanol, FBS								Flow cytometry for a-actinin	79		Vitronectin			Yes								Scaffold free	CM			100, 0, 0		Yes
	Ma, X. et al. 3D printed micro-scale force gauge arrays to improve human cardiac tissue maturation and enable high throughput drug testing. Acta Biomater 95, 319–327 (2019).	2019	3D printed micro-scale force gauge arrays to improve human cardiac tissue maturation and enable high throughput drug testing	Acta Biomater 95, 319–327 (2019)	https://doi.org/10.1016/j.actbio.2018.12.026		BJ1	1	Male	NaN	Matrigel	E8	80	PSC Cardiomyocyte Differentiation Kit (Gibco)	PSC Cardiomyocyte Differentiation Kit (Gibco)		0-2		2022-02-04	4, not 12-18	No glucose with lactate	2022-12-18			RPMI-1640, B27	Laminin			Yes	Yes		Yes					Collagen + Fibrin + matrigel	CM			100, 0, 0	RPMI-1640, B27	Yes		Yes	1.8			Post deflection
	Ma, Z. et al. Contractile deficits in engineered cardiac microtissues as a result of MYBPC3 deficiency and mechanical overload. Nat Biomed Eng 2, 955–967 (2018).	2018	Contractile deficits in engineered cardiac microtissues as a result of MYBPC3 deficiency and mechanical overload	Nat Biomed Eng 2, 955–967 (2018)	https://doi.org/10.1038/s41551-018-0280-4		WTC11	1	Male	Asian	Matrigel	E8		RPMI-1640	B27	CHIR99021	0-1	IWP4	2022-03-05	8	No glucose with lactate	17-19	Flow cytometry for cTnT+	80		Matrigel							Yes				3D filamentous matrices composed of three layers of micronscale parallel fibers	CM			100, 0, 0	RPMI-1640, B27	Yes						Motion tracking analysis
	Ma, Z. et al. Self-organizing human cardiac microchambers mediated by geometric confinement. Nat Commun 6, (2015).	2015	Self-organizing human cardiac microchambers mediated by geometric confinement	Nat Commun 6, (2015)	https://doi.org/10.1038/ncomms8413		WTC11	1	Male	Asian	Matrigel	mTeSR-1		RPMI-1640	B27	CHIR99021	0-1	IWP4	2022-03-05	7													Yes			PEG + ECM	Scaffoldless	CM			100, 0, 0	RPMI-1640, B27	Yes						Motion tracking analysis
	Macqueen, L. A. et al. A tissue-engineered scale model of the heart ventricle. Nat Biomed Eng 2, 930–941 (2018).	2018	A tissue-engineered scale model of the heart ventricle	Nat Biomed Eng 2, 930–941 (2018)	https://doi.org/10.1038/s41551-018-0271-5		Cor.4U, PGP1	6	NaN, Male	NaN, Caucasian	Gelatin	mTeSR-1	100	RPMI-1640	B27	CHIR99021	0-2	IWR1	2023-02-04	6			Visual inspection										Yes				Ventricle scaffolds PCL/gelatin nanofibrous sheets, with human fibronectin	CM			100, 0, 0	RPMI-1640, B27	Yes		Yes
	Madsen, A. et al. An Important Role for DNMT3A-Mediated DNA Methylation in Cardiomyocyte Metabolism and Contractility. Circulation 142, 1562–1578 (2020).	2020	An Important Role for DNMT3A-Mediated DNA Methylation in Cardiomyocyte Metabolism and Contractility	Circulation 142, 1562–1578 (2020)	https://doi.org/10.1161/CIRCULATIONAHA.119.044444		UKEi003-C	1	Female	Caucasian	EBs	FTDA	EB	RPMI-1640	Polyvinyl alcohol, HEPES, human serum albumin, L-ascorbic acid, transferrin–selenium, lipid mix	Activin A, BMP4, bFGF		XAV939					Flow cytometry for cTnT+	80	RPMI-1640, B27					Yes							Fibrin	CM			100, 0, 0	DMEM, heat-inactivated horse serum, aprotinin, insulin	Yes	TEM					Post deflection
	Mannhardt, I. et al. Human Engineered Heart Tissue: Analysis of Contractile Force. Stem Cell Reports 7, 29–42 (2016).	2016	Human Engineered Heart Tissue: Analysis of Contractile Force	Stem Cell Reports 7, 29–42 (2016)	https://doi.org/10.1016/j.stemcr.2016.04.011		in-house, iCell, Cor.4U	3	NaN, NaN, NaN	NaN, NaN, NaN	Geltrex then EBs	FTDA	EB	RPMI-1640	Polyvinyl alcohol, HEPES, human serum albumin, L-ascorbic acid, transferrin–selenium, lipid mix	Activin A, BMP4, bFGF	0-3	DS-I-7	2022-03-10	7, not 10-13	1-Thioglycerol	2022-10-23	Flow cytometry for cTnT+	85		Geltrex				Yes							Fibrin + matrigel	CM			100, 0, 0	DMEM, horse serum, insulin, aprotinin	Yes	TEM		1.6		Yes	Post deflection
	Mannhardt, I., Warncke, C., Trieu, H. K., Müller, J. & Eschenhagen, T. Piezo-bending actuators for isometric or auxotonic contraction analysis of engineered heart tissue. J Tissue Eng Regen Med 13, 3–11 (2019).	2019	Piezo-bending actuators for isometric or auxotonic contraction analysis of engineered heart tissue	J Tissue Eng Regen Med 13, 3–11 (2019)	https://doi.org/10.1002/term.2755		in-house	1	NaN	NaN	Geltrex	FTDA	EB	RPMI-1640	B27, HEPES, 1-thioglycerol	Activin A, BMP4, bFGF	0-3	DS-I-7	2023-03-10	6										Yes		Yes					Fibrin	CM			100, 0, 0	DMEM, horse serum, insulin, aprotinin							Post deflection
	Marchiano, S. et al. SARS-CoV-2 Infects Human Pluripotent Stem Cell-Derived Cardiomyocytes, Impairing Electrical and Mechanical Function. Stem Cell Reports 16, 478–492 (2021).	2021	SARS-CoV-2 Infects Human Pluripotent Stem Cell-Derived Cardiomyocytes, Impairing Electrical and Mechanical Function	Stem Cell Reports 16, 478–492 (2021)	https://doi.org/10.1016/j.stemcr.2021.02.008	GSE162736	WTC11	1	Male	Asian	Matrigel	mTeSR-1		RPMI-1640	L-ascorbic acid, albumin	CHIR99021	0-1	Wnt-C59	2023-02-04	6			Flow cytometry for cTnT+	83	RPMI-1640, B27					Yes	Yes					ECM-coated plastic/glass	Fibrin	CM + SC	SC		91, 0, 9	RPMI-1640, B27, aminocaproic acid	Yes	TEM					Post deflection
	Marsano, A. et al. Beating heart on a chip: A novel microfluidic platform to generate functional 3D cardiac microtissues. Lab Chip 16, 599–610 (2016).	2016	Beating heart on a chip: A novel microfluidic platform to generate functional 3D cardiac microtissues	Lab Chip 16, 599–610 (2016)	https://doi.org/10.1039/C5LC01356A		iCell	1	NaN	NaN																						Yes					Fibrin	CM			100, 0, 0	DMEM, HEPES, L-glutamine, FBS, aprotinin	Yes	SEM, TEM					Motion tracking analysis
	Martella, D. et al. Liquid Crystalline Networks toward Regenerative Medicine and Tissue Repair. Small 13, (2017).	2017	Liquid Crystalline Networks toward Regenerative Medicine and Tissue Repair	Small 13, (2017)	https://doi.org/10.1002/smll.201702677		ax2505	1	NaN	NaN				Axol Biosciences Cardiomyocyte Maintenance Media	FBS											Liquid Crystal Networks			Conductive material				Yes			Nanotopography									Yes		7000
	Martewicz, S. et al. Live Cell Imaging in Microfluidic Device Proves Resistance to Oxygen/Glucose Deprivation in Human Induced Pluripotent Stem Cell-Derived Cardiomyocytes. Anal Chem 90, 5687–5695 (2018).	2018	Live Cell Imaging in Microfluidic Device Proves Resistance to Oxygen/Glucose Deprivation in Human Induced Pluripotent Stem Cell-Derived Cardiomyocytes	Anal Chem 90, 5687–5695 (2018)	https://doi.org/10.1021/acs.analchem.7b05347		ADHF	1	NaN	NaN	Matrigel	mTeSR-1	90	RPMI-1640	B27	CHIR99021	0-2	IWP4	2022-03-05	7					RPMI-1640, L-ascorbic acid, B27	Matrigel										ECM-coated plastic/glass							Yes
	Martewicz, S. et al. Transcriptomic Characterization of a Human In Vitro Model of Arrhythmogenic Cardiomyopathy Under Topological and Mechanical Stimuli. Ann Biomed Eng 47, 852–865 (2019).	2019	Transcriptomic Characterization of a Human In Vitro Model of Arrhythmogenic Cardiomyopathy Under Topological and Mechanical Stimuli	Ann Biomed Eng 47, 852–865 (2019)	https://doi.org/10.1007/s10439-018-02134-8	GSE115621	in-house	1	NaN	NaN	Matrigel	E8		RPMI-1640	B27	CHIR99021	0-1	IWP4	2022-03-05											Yes		Yes	Yes			ECM-coated plastic/glass							Yes						Stretching device
	Mastikhina, O. et al. Human cardiac fibrosis-on-a-chip model recapitulates disease hallmarks and can serve as a platform for drug testing. Biomaterials 233, (2020).	2020	Human cardiac fibrosis-on-a-chip model recapitulates disease hallmarks and can serve as a platform for drug testing	Biomaterials 233, (2020)	https://doi.org/10.1016/j.biomaterials.2019.119741		iCellA, iCellB	2	NaN, NaN	NaN, NaN																				Yes	Yes						Fibrin + matrigel	CM + SC	hCF		75, 0, 25	StemPro-34, StemPro-34 Nutrient Supplement, L-glutamine, L-ascorbic acid, transferrin, 1-thioglycerol	Yes						Post deflection
	Masumoto, H. et al. The myocardial regenerative potential of three-dimensional engineered cardiac tissues composed of multiple human iPS cell-derived cardiovascular cell lineages. Sci Rep 6, (2016).	2016	The myocardial regenerative potential of three-dimensional engineered cardiac tissues composed of multiple human iPS cell-derived cardiovascular cell lineages	Sci Rep 6, (2016)	https://doi.org/10.1038/srep29933		201B6	1	Female	Caucasian	Matrigel	MEF-conditioned medium		RPMI-1640	B27	Activin A, BMP4, bFGF, Wnt3a	0-5	Dkk1	2023-05-07	5			Flow cytometry for cTnT+	62	RPMI-1640, B27, VEGF					Yes	Yes						Collagen + matrigel	CM + EC + SC	hiPSC-MC	hiPSC-EC	62, 19, 2	α-MEM, FBS, β-mercaptoethanol	Yes	TEM					Force transducer
	Mathur, A. et al. Human iPSC-based cardiac microphysiological system for drug screening applications. Sci Rep 5, (2015).	2015	Human iPSC-based cardiac microphysiological system for drug screening applications	Sci Rep 5, (2015)	https://doi.org/10.1038/srep08883		WTC11	1	Male	Asian	Matrigel	E8	85	RPMI-1640	B27	CHIR99021	0-1	IWP4	2022-02-05	7			Flow cytometry for cTnT+	90								Flow					Scaffold free, microfluidic device	CM			100, 0, 0	Knockout DMEM, FBS, L-glutamine, NEAAs, β-mercaptoethanol	Yes						Motion tracking analysis
	Matsuura, K. et al. Induced pluripotent stem cell elimination in a cell sheet by methionine-free and 42°C condition for tumor prevention. Tissue Eng Part C Methods 24, 605–615 (2018).	2018	Induced pluripotent stem cell elimination in a cell sheet by methionine-free and 42Ã‚Â°C condition for tumor prevention	Tissue Eng Part C Methods 24, 605–615 (2018)	https://doi.org/10.1089/ten.TEC.2018.0228		201B7	1	Female	Caucasian			EB	iCell Maintenance Medium (CDI)	iCell Maintenance Medium (CDI)	Activin A, BMP4, bFGF	0-4	IWR1	2022-04-06		Cell sorting															ECM-coated plastic/glass							Yes
	Mattapally, S. et al. Spheroids of cardiomyocytes derived from human-induced pluripotent stem cells improve recovery from myocardial injury in mice. Am J Physiol Heart Circ Physiol 315, H327–H339 (2018).	2018	Spheroids of cardiomyocytes derived from human-induced pluripotent stem cells improve recovery from myocardial injury in mice	Am J Physiol Heart Circ Physiol 315, H327–H339 (2018)	https://doi.org/10.1152/ajpheart.00688.2017		GRiPS	1	NaN	NaN	Matrigel			RPMI-1640	B27	CHIR99021	0-1	IWR1	2022-03-05	5	No glucose with lactate	2023-10-15	IHC: cTnT, Cx43, MLC2v, MLC2A													ECM-coated plastic/glass	Fibrin	CM			100, 0, 0	RPMI-1640, B27	Yes
	McMinn, P., Guckenberger, D. J. & Beebe, D. J. Induced Pluripotent Stem Cells on a Chip: A Self-Contained, Accessible, Pipette-less iPSC Culturing and Differentiation Kit. SLAS Technol 26, 80–91 (2021).	2021	Induced Pluripotent Stem Cells on a Chip: A Self-Contained, Accessible, Pipette-less iPSC Culturing and Differentiation Kit	SLAS Technol 26, 80–91 (2021)	https://doi.org/10.1177/2472630320921173		IMR-90	1	Female	NaN	Matrigel	mTeSR1, TeSR-E8		RPMI-1640	B27	CHIR99021	0-1	IWP4	2022-02-04	4																ECM-coated plastic/glass							Yes
	Melby, J. A. et al. Functionally Integrated Top-Down Proteomics for Standardized Assessment of Human Induced Pluripotent Stem Cell-Derived Engineered Cardiac Tissues. J Proteome Res 20, 1424–1433 (2021).	2021	Functionally Integrated Top-Down Proteomics for Standardized Assessment of Human Induced Pluripotent Stem Cell-Derived Engineered Cardiac Tissues	J Proteome Res 20, 1424–1433 (2021)	https://doi.org/10.1021/acs.jproteome.0c00830		DF19-9-11T.H	1	Male	NaN	Matrigel	StemFlex	100	RPMI-1640	B27	CHIR99021	0-1	IWP4	2022-03-05	7, not 17-24	No glucose with lactate	17-24	Visual inspection	95						Yes	Yes						Fibrin	CM + SC	hiPSC-CF		91, 0, 9	High-glucose DMEM, F12 nutrient, FBS, horse serum, HEPES, NEAAs, sodium pyruvate, insulin, tranexamic acid, aprotinin							Force transducer
	Michas, C. et al. Engineering a living cardiac pump on a chip using high-precision fabrication. Sci. Adv 8 (2022).	2022	Engineering a living cardiac pump on a chip using high-precision fabrication	Sci. Adv 8 (2022)	https://doi.org/10.1126/sciadv.abm3791		PGP1	1	Male	Caucasian	Matrigel	mTeSR-1	90	RPMI-1640	B27	CHIR99021	0-1	IWP4	2022-03-05	10, not 12-16	No glucose with lactate	2023-12-16				Fibronectin					Yes	Flow	Yes				Fibrin + matrigel	CM + SC	hMSC		98, 0, 2	RPMI-1640, B27	Yes						Motion tracking analysis
	Miki, K. et al. ERRγ enhances cardiac maturation with T-tubule formation in human iPSC-derived cardiomyocytes. Nat Commun 12, (2021).	2021	ERRγ enhances cardiac maturation with T-tubule formation in human iPSC-derived cardiomyocytes	Nat Commun 12, (2021)	https://doi.org/10.1038/s41467-021-23816-3		1390D4, 1390C1, 409B2	3	NaN, NaN, Female	NaN, NaN, Caucasian	iMatrix-511	Primate ES cell medium (REPROCELL) with human recombinant basic fibroblast growth factor (bFGF), AK02N medium	EB	StemPro-34	L-glutamine, 1-thioglycerol, L-ascorbic acid, transferrin, VEGF	Activin A, BMP4, bFGF	0-2	IWP3 - also SB431542, VEGF	2023-02-05				Flow cytometry for cTnT+	99			Signal perturbation	ERRγ agonist GSK4716, S-phase kinase-associated protein 2 inhibitor								ECM-coated plastic/glass							Yes	TEM	Yes	2.1		Yes	Motion tracking analysis
	Miller, J. M. et al. Heart slice culture system reliably demonstrates clinical drug-related cardiotoxicity. Toxicol Appl Pharmacol 406, (2020).	2020	Heart slice culture system reliably demonstrates clinical drug-related cardiotoxicity	Toxicol Appl Pharmacol 406, (2020)	https://doi.org/10.1016/j.taap.2020.115213		iCell	1	NaN	NaN				iCell Maintenance Medium (CDI)	iCell Maintenance Medium (CDI)																					ECM-coated plastic/glass
	Mills, R. J. et al. Functional screening in human cardiac organoids reveals a metabolic mechanism for cardiomyocyte cell cycle arrest. Proc Natl Acad Sci U S A 114, E8372–E8381 (2017).	2017	Functional screening in human cardiac organoids reveals a metabolic mechanism for cardiomyocyte cell cycle arrest	Proc Natl Acad Sci U S A 114, E8372–E8381 (2017)	https://doi.org/10.1073/pnas.1707316114		ATCC-BXS0116	1	NaN	NaN	Matrigel	mTeSR-1		RPMI-1640	B27, L-ascorbic acid	Activin A, BMP4, CHIR99021, bFGF	0-3	IWP4	2023-03-06	6			Flow cytometry for cTnT+, a-actinin	70	α-MEM, GlutaMax, FBS, L-ascorbic acid		Yes	Palmitic acid, TGFβ-1		Yes	Yes (not pure)						Collagen + matrigel	CM + SC	hiPSC-SC		70, 0, 30	α-MEM, FBS, L-ascorbic acid	Yes	TEM		2.3		Yes	Post deflection
	Minor, A. J. & Coulombe, K. L. K. Stimulating Calcium Handling in hiPSC-Derived Engineered Cardiac Tissues Enhances Force Production. Stem Cells Transl Med 11, 97–106 (2022).	2022	Stimulating Calcium Handling in hiPSC-Derived Engineered Cardiac Tissues Enhances Force Production	Stem Cells Transl Med 11, 97–106 (2022)	https://doi.org/10.1093/stcltm/szab002		WTC11	1	Male	Asian	Vitronectin then Matrigel	E8		RPMI-1640	B27	CHIR99021	0-1	IWP2	2022-03-05	10, not 14-21	No glucose with lactate	14-21	Flow cytometry for cTnT+	61	RPMI-1640, B27, 1.1mM Ca2+				Yes	Yes							Collagen	CM			100, 0, 0	RPMI-1640, B27, 1.1mM Ca2+	Yes						Force transducer
	Miwa, T., Idiris, A. & Kumagai, H. A novel cardiac differentiation method of a large number and uniformly-sized spheroids using microfabricated culture vessels. Regen Ther 15, 18–26 (2020).	2020	A novel cardiac differentiation method of a large number and uniformly-sized spheroids using microfabricated culture vessels	Regen Ther 15, 18–26 (2020)	https://doi.org/10.1016/j.reth.2020.04.008		201B7, 253G1	2	Female, NaN	Caucasian, NaN	Matrigel	mTeSR-1	EB	StemPro-34	VEGF, bFGF	Activin A, BMP4, bFGF	0-4	IWP4	2022-04-06				Flow cytometry for cTnT+	95													Scaffold free	CM			100, 0, 0		Yes
	Moon, I., Ahmadzadeh, E., Jaferzadeh, K. & Kim, N. Automated quantification study of human cardiomyocyte synchronization using holographic imaging. Biomed Opt Express 10, 610 (2019).	2019	Automated quantification study of human cardiomyocyte synchronization using holographic imaging	Biomed Opt Express 10, 610 (2019)	https://doi.org/10.1364/BOE.https://doi.org/10.000610		iCell	1	NaN	NaN				iCell Maintenance Medium (CDI)	iCell Maintenance Medium (CDI)																					ECM-coated plastic/glass													Motion tracking analysis
	Murphy, J. F. et al. Adult human cardiac stem cell supplementation effectively increases contractile function and maturation in human engineered cardiac tissues. Stem Cell Res Ther 10, (2019).	2019	Adult human cardiac stem cell supplementation effectively increases contractile function and maturation in human engineered cardiac tissues	Stem Cell Res Ther 10, (2019)	https://doi.org/10.1186/s13287-019-1486-4		SKiPS-31.3	1	NaN	NaN	Matrigel	mTeSR-1		iCell Maintenance Medium (CDI)	B27	CHIR99021	0-1	IWR1	2022-03-04											Yes	Yes						Collagen + matrigel	CM + cardiac stem cells (CSCs)			90, 0, 10	F12, HAM's, FBS, bFGF, l-glutathione	Yes						Post deflection
	Nakane, T. et al. Impact of Cell Composition and Geometry on Human Induced Pluripotent Stem Cells-Derived Engineered Cardiac Tissue. Sci Rep 7, (2017).	2017	Impact of Cell Composition and Geometry on Human Induced Pluripotent Stem Cells-Derived Engineered Cardiac Tissue	Sci Rep 7, (2017)	https://doi.org/10.1038/srep45641		201B6	1	Female	Caucasian	Matrigel	MEF-conditioned medium, bFGF		iCell Maintenance Medium (CDI)	B27	Activin A, BMP4, bFGF, Wnt3a	0-5			5			Flow cytometry for VCAM1+							Yes	Yes		Yes				Collagen + matrigel	CM + EC + SC	hiPSC-MC	hiPSC-EC	45, 18, 15	High glucose-DMEM, FBS	Yes		Yes				Force transducer
	Navaratnarajah, C. K. et al. Highly Efficient SARS-CoV-2 Infection of Human Cardiomyocytes: Spike Protein-Mediated Cell Fusion and Its Inhibition. J Virol 95, (2021).	2021	Highly Efficient SARS-CoV-2 Infection of Human Cardiomyocytes: Spike Protein-Mediated Cell Fusion and Its Inhibition	J Virol 95, (2021)	https://doi.org/10.1128/JVI.01368-21	GSE184715	in-house	1	NaN	NaN	Geltrex	mTeSR-1	EB	iCell Maintenance Medium (CDI)		CHIR99021		IWP4								Fibronectin										ECM-coated plastic/glass							Yes	SEM, TEM
	Ng, R. et al. Contractile work directly modulates mitochondrial protein levels in human engineered heart tissues. Am J Physiol Heart Circ Physiol 318, 1516–1524 (2020).	2020	Contractile work directly modulates mitochondrial protein levels in human engineered heart tissues	Am J Physiol Heart Circ Physiol 318, 1516–1524 (2020)	https://doi.org/10.1152/ajpheart.00055.2020		PGP1	1	Male	Caucasian	Matrigel	mTeSR-1	100	iCell Maintenance Medium (CDI)	B27	CHIR99021	0-1	IWP	2022-03-05	9									Yes	Yes	Yes	Yes			Yes		Decellularized tissue	CM + SC	hCF		91, 0, 9								Force transducer
	Noor, N. et al. 3D Printing of Personalized Thick and Perfusable Cardiac Patches and Hearts. Advanced Science 6, (2019).	2019	3D Printing of Personalized Thick and Perfusable Cardiac Patches and Hearts	Advanced Science 6, (2019)	https://doi.org/10.1002/advs.201900344		in-house	1	NaN	NaN	Matrigel	NutriStem Medium	100	iCell Maintenance Medium (CDI)	FBS, vitamin B12, zinc sulphate heptahydrate, cupric sulfate pentahydrate	CHIR99021	0-2	IWP2	2022-04-06	8											Yes				Yes		Decellularized tissue	CM + EC + SC	hiPSC-CF	hiPSC-EC	85, 12.5, 2.5	EGM2	Yes	SEM
	Oleaga, C. et al. Investigation of the effect of hepatic metabolism on off-target cardiotoxicity in a multi-organ human-on-a-chip system. Biomaterials 182, 176–190 (2018).	2018	Investigation of the effect of hepatic metabolism on off-target cardiotoxicity in a multi-organ human-on-a-chip system	Biomaterials 182, 176–190 (2018)	https://doi.org/10.1016/j.biomaterials.2018.07.062		iCell	1	NaN	NaN				iCell Maintenance Medium (CDI)	iCell Maintenance Medium (CDI)																	Flow				MEA						HSL2 medium							Post deflection
	Oleaga, C. et al. Multi-Organ toxicity demonstration in a functional human in vitro system composed of four organs. Sci Rep 6, (2016).	2016	Multi-Organ toxicity demonstration in a functional human in vitro system composed of four organs	Sci Rep 6, (2016)	https://doi.org/10.1038/srep20030		iCell	1	NaN	NaN				iCell Maintenance Medium (CDI)	iCell Maintenance Medium (CDI)																Yes	Flow				ECM-coated plastic/glass						Ultraculture medium, B27, L-glutamine, dextrose	Yes						Post deflection
	Ong, C. S. et al. Biomaterial-Free Three-Dimensional Bioprinting of Cardiac Tissue using Human Induced Pluripotent Stem Cell Derived Cardiomyocytes. Sci Rep 7, (2017).	2017	Biomaterial-Free Three-Dimensional Bioprinting of Cardiac Tissue using Human Induced Pluripotent Stem Cell Derived Cardiomyocytes	Sci Rep 7, (2017)	https://doi.org/10.1038/srep20030		in-house	1	NaN	NaN	Matrigel	mTeSR-1		RPMI-1640	B27	CHIR99021	0-1	IWR1	2023-03-05	Not clear			Flow cytometry for VCAM1+	93							Yes		Yes				Scaffold free	CM + EC + SC	hCF	HUVEC	70, 15, 15		Yes						Motion tracking analysis
	Ozcebe, S. G., Bahcecioglu, G., Yue, X. S. & Zorlutuna, P. Effect of cellular and ECM aging on human iPSC-derived cardiomyocyte performance, maturity and senescence. Biomaterials 268, (2021).	2021	Effect of cellular and ECM aging on human iPSC-derived cardiomyocyte performance, maturity and senescence	Biomaterials 268, (2021)	https://doi.org/10.1016/j.biomaterials.2020.120554		HVRDi007-A	1	Male	NaN	Geltrex	mTeSR-1	90	RPMI-1640	B27, β-mercaptoethanol	CHIR99021	0-2	IWP4	2022-04-06	9						FIbronectin									Yes	ECM-coated plastic/glass						RPMI-1640, B27, β-mercaptoethanol	Yes						Motion tracking analysis
	Parikh, S. S. et al. Thyroid and Glucocorticoid Hormones Promote Functional T-Tubule Development in Human-Induced Pluripotent Stem Cell-Derived Cardiomyocytes. Circ Res 121, 1323–1330 (2017).	2017	Thyroid and Glucocorticoid Hormones Promote Functional T-Tubule Development in Human-Induced Pluripotent Stem Cell-Derived Cardiomyocytes	Circ Res 121, 1323–1330 (2017)	https://doi.org/10.1161/CIRCRESAHA.117.311920		in-house	2	NaN	NaN	Matrigel	mTeSR-1	75	RPMI-1640	B27	CHIR99021	0-2	IWR1	2022-03-05	16	No glucose	2022-10-16			RPMI-1640, B27, T3, dexamethasone	Matrigel	Yes	T3 (triiodothyronine), Dex (dexamethasone)						Yes		Thick matrigel						RPMI-1640, B27, T3, dexamethasone	Yes				2000	Yes	Motion track analysis
	Park, J. et al. Modular design of a tissue engineered pulsatile conduit using human induced pluripotent stem cell-derived cardiomyocytes. Acta Biomater 102, 220–230 (2020).	2020	Modular design of a tissue engineered pulsatile conduit using human induced pluripotent stem cell-derived cardiomyocytes	Acta Biomater 102, 220–230 (2020)	https://doi.org/10.1016/j.actbio.2019.https://doi.org/10.019		Y6	1	NaN	NaN	Matrigel	KO-DMEM/F12, KOSR, L-glutamine, NEAAs, bFGF, β-mercaptoethanol	90	RPMI-1640	B27	CHIR99021	0-1	IWP4	2022-03-05	11	No glucose with lactate	2022-12-14								Yes	Yes						Collagen, PGA mesh, decellularized porcine ECM	CM + SC	hCF		70, 0, 30	RPMI-1640, B27	Yes						Force transducer
	Park, S. J. et al. Insights into the Pathogenesis of Catecholaminergic Polymorphic Ventricular Tachycardia from Engineered Human Heart Tissue. Circulation 140, 390–404 (2019).	2019	Insights into the Pathogenesis of Catecholaminergic Polymorphic Ventricular Tachycardia from Engineered Human Heart Tissue	Circulation 140, 390–404 (2019)	https://doi.org/10.1038/s41598-017-05018-4		in-house, Cor.4U	2	NaN, NaN	NaN, NaN	Matrigel	mTeSR-1		Cor.4U complete medium or 1:1 RPMI-1640:No-glucose DMEM	Cor.4U complete medium, or RPMI-1640, B27, lactate, FBS	CHIR99021	0-1	IWR1	2022-03-05		No glucose with lactate	15-18	Flow cytometry for cTnT+	92					Optical stimulation					Yes		Hydrogel		CM			100, 0, 0	Cor.4U complete medium, or RPMI-1640, B27, lactate, FBS	Yes						Motion tracking analysis
	Parveen, S., Singh, S. P., Panicker, M. M. & Gupta, P. K. Amniotic membrane as novel scaffold for human iPSC-derived cardiomyogenesis. In Vitro Cell Dev Biol Anim 55, 272–284 (2019).	2019	Amniotic membrane as novel scaffold for human iPSC-derived cardiomyogenesis	In Vitro Cell Dev Biol Anim 55, 272–284 (2019)	https://doi.org/10.1007/s11626-019-00321-y		in-house	1	NaN	NaN			EB	Knockout DMEM	B27	Activin A, BMP4, bFGF	0-4	BMP4, Activin A, bFGF, VEGF	2022-04-08							Matrigel									Yes	Decellularized ECM							Yes
	Pasqualini, F. S., Sheehy, S. P., Agarwal, A., Aratyn-Schaus, Y. & Parker, K. K. Structural phenotyping of stem cell-derived cardiomyocytes. Stem Cell Reports 4, 340–347 (2015).	2015	Structural phenotyping of stem cell-derived cardiomyocytes	Stem Cell Reports 4, 340–347 (2015)	https://doi.org/10.1016/j.stemcr.2015.01.020		iCell	1	NaN	NaN				iCell Maintenance Medium (CDI)	iCell Maintenance Medium (CDI)											FIbronectin								Yes		Micropatterned PDMS, Micropatterned PAA							Yes
	Peters, M. C. et al. Follistatin-like 1 promotes proliferation of matured human hypoxic iPSC-cardiomyocytes and is secreted by cardiac fibroblasts. Mol Ther Methods Clin Dev 25, 3–16 (2022).	2022	Follistatin-like 1 promotes proliferation of matured human hypoxic iPSC-cardiomyocytes and is secreted by cardiac fibroblasts	Mol Ther Methods Clin Dev 25, 3–16 (2022)	https://doi.org/10.1016/j.omtm.2022.02.005		SCVI-273, UKKi032-C	2	NaN, Female	NaN, NaN		E8	95	iCell Maintenance Medium (CDI)	B27	CHIR99021	0-3	Wnt-C59	2022-03-07	7	No glucose	2022-09-16	Flow cytometry for ACTN1+		DMEM without glucose with 3mM glucose, L-lactate, vitamin B12, biotin, creatine monohydrate, taurine, L-carnitine, L-ascorbic acid, NEAAs, Albumax, B27, KOSR		Yes	L-lactate, Vitamin B12, Biotin, Creatine monohydrate, Taurine, L-carnitine, Ascorbic acid, 1x NEAA, Albumax, 1x B27, 1% KOSR			Yes					Micropatterned plastic/glass							Yes
	Peters, M. C. et al. Metabolic Maturation Increases Susceptibility to Hypoxia-induced Damage in Human iPSC-derived Cardiomyocytes. Stem Cells Transl Med 11, 1040–1051 (2022).	2022	Metabolic Maturation Increases Susceptibility to Hypoxia-induced Damage in Human iPSC-derived Cardiomyocytes	Stem Cells Transl Med 11, 1040–1051 (2022)	https://doi.org/10.1093/stcltm/szac061		SCVI-273, UKKi032-C	2	NaN, Female	NaN, NaN	Matrigel	E8	85	iCell Maintenance Medium (CDI)	B27	CHIR99021	0-3	Wnt-C59	2022-03-07	7	No glucose	2022-09-16	Flow cytometry for cTnT+; Flow cytometry for ACTN1+	94	DMEM without glucose with 3mM glucose, L-lactate, vitamin B12, biotin, creatine monohydrate, taurine, L-carnitine, L-ascorbic acid, NEAAs, Albumax, B27, KOSR	Matrigel	Yes	L-lactate, Vitamin B12, Biotin, Creatine monohydrate, Taurine, L-carnitine, Ascorbic acid, 1x NEAA, Albumax, 1x B27, 1% KOSR								ECM-coated plastic/glass						DMEM without glucose with 3mM glucose, L-lactate, vitamin B12, biotin, creatine monohydrate, taurine, L-carnitine, L-ascorbic acid, NEAAs, Albumax, B27, KOSR	Yes						Motion tracking analysis
	Pioner, J. M. et al. Isolation and mechanical measurements of myofibrils from human induced pluripotent stem cell-derived cardiomyocytes. Stem Cell Reports 6, 885–896 (2016).	2016	Isolation and mechanical measurements of myofibrils from human induced pluripotent stem cell-derived cardiomyocytes	Stem Cell Reports 6, 885–896 (2016)	https://doi.org/10.1016/j.stemcr.2016.04.006		in-house (2)	2	NaN	NaN	Matrigel	mTeSR-1		iCell Maintenance Medium (CDI)	B27	CHIR99021, Activin A	0-3	XAV939	3-x	7			Flow cytometry for cTnT+	60									Yes			Micropatterned plastic/glass							Yes	TEM		1.8	7696	Yes
	Pioner, J. M. et al. Optical investigation of action potential and calcium handling maturation of hiPSC-cardiomyocytes on biomimetic substrates. Int J Mol Sci 20, (2019).	2019	Optical investigation of action potential and calcium handling maturation of hiPSC-cardiomyocytes on biomimetic substrates	Int J Mol Sci 20, (2019)	https://doi.org/10.3390/ijms20153799		UC3-4 A1	1	NaN	NaN	Matrigel	mTeSR-1	70	iCell Maintenance Medium (CDI)	B27		0-2		2023-02-04	12													Yes	Yes		Micropatterned plastic/glass
	Pires, R. H., Shree, N., Manu, E., Guzniczak, E. & Otto, O. Cardiomyocyte mechanodynamics under conditions of actin remodelling. Philosophical Transactions of the Royal Society B: Biological Sciences 374, (2019).	2019	Cardiomyocyte mechanodynamics under conditions of actin remodelling	Philosophical Transactions of the Royal Society B: Biological Sciences 374, (2019)	https://doi.org/10.3390/ijms20153799		iCell	1	NaN	NaN				iCell Maintenance Medium (CDI)	iCell Maintenance Medium (CDI)											Geltrex										ECM-coated plastic/glass
	Pointon, A. et al. High-throughput imaging of cardiac microtissues for the assessment of cardiac contraction during drug discovery. Toxicological Sciences 155, 444–457 (2017).	2017	High-throughput imaging of cardiac microtissues for the assessment of cardiac contraction during drug discovery	Toxicological Sciences 155, 444–457 (2017)	https://doi.org/10.1093/toxsci/kfw227		iCell	1	NaN	NaN				iCell Maintenance Medium (CDI)	iCell Maintenance Medium (CDI)											Gelatin											Scaffold free	CM + EC + SC	hCF	CMVEC	67, 16.5, 16.5	iCell CM Maintenance Media (CDI), EBM2	Yes						Motion tracking analysis
	Polonchuk, L. et al. Cardiac spheroids as promising in vitro models to study the human heart microenvironment. Sci Rep 7, (2017).	2017	Cardiac spheroids as promising in vitro models to study the human heart microenvironment	Sci Rep 7, (2017)	https://doi.org/10.1038/s41598-017-06385-8		Cor.4U	1	NaN	NaN				iCell Maintenance Medium (CDI)																	Yes						Scaffold free	CM + EC + SC	hiPSC-CF	HCAEC	50, 25, 25		Yes	TEM
	Portillo-Esquivel, L. E., Nanduri, V., Zhang, F., Liang, W. & Zhang, B. z-Wire: A Microscaffold That Supports Guided Tissue Assembly and Intramyocardium Delivery for Cardiac Repair. Adv Healthc Mater 9, (2020).	2020	z-Wire: A Microscaffold That Supports Guided Tissue Assembly and Intramyocardium Delivery for Cardiac Repair	Adv Healthc Mater 9, (2020)	https://doi.org/10.1002/adhm.202000358		iCell	1	NaN	NaN				iCell Maintenance Medium (CDI)	iCell Maintenance Medium (CDI)											Gelatin				Yes	Yes		Yes: Magnetic guided anisotropy				Z-wires with Iron(III) oxide nanoparticles (magnetic)	CM + SC	hiPSC-CF		50, 0, 50	iCell Maintenance Medium (CDI)	Yes		Yes				Motion tracking analysis
	Prajapati, C., Pölönen, R. P. & Aalto-Setälä, K. Simultaneous recordings of action potentials and calcium transients from human induced pluripotent stem cell derived cardiomyocytes. Biol Open 7, (2018).	2018	Simultaneous recordings of action potentials and calcium transients from human induced pluripotent stem cell derived cardiomyocytes	Biol Open 7, (2018)	https://doi.org/10.1242/bio.035030		UTA.04602.WT, UTA.04511.WT	2	Female, NaN	Caucasian, NaN	MEF feeder cells	KO-DMEM, KOSR, GlutaMax, NEAAs	EB	iCell Maintenance Medium (CDI)	FBS, NEAAs, GlutaMax								IHC for cTnT and RyR2			Gelatin										ECM-coated plastic/glass							Yes
	Pretorius, D. et al. Layer-By-Layer Fabrication of Large and Thick Human Cardiac Muscle Patch Constructs With Superior Electrophysiological Properties. Front Cell Dev Biol 9, (2021).	2021	Layer-By-Layer Fabrication of Large and Thick Human Cardiac Muscle Patch Constructs With Superior Electrophysiological Properties	Front Cell Dev Biol 9, (2021)	https://doi.org/10.3389/fcell.2021.670504		Not listed	Not listed	NaN	NaN	Matrigel	mTeSR-1		iCell Maintenance Medium (CDI)	B27	Yes, Not listed					No glucose with lactate	2023-09-15	Flow cytometry for cTnT+	98							Yes						Fibrin + matrigel	CM + EC + SC	hiPSC-CF	hiPSC-EC	57, 29, 14	DMEM, B27, FBS, aminocaproic acid	Yes						Motion tracking analysis
	Pretorius, D., Kahn-Krell, A. M., LaBarge, W. C., Lou, X. & Zhang, J. Engineering of thick human functional myocardium via static stretching and electrical stimulation. iScience 25, (2022).	2022	Engineering of thick human functional myocardium via static stretching and electrical stimulation	iScience 25, (2022)	https://doi.org/10.1016/j.isci.2022.103824		hiPSC5, lzhiPSC5	3	NaN, NaN	NaN, NaN	Geltrex	mTeSR Plus	90	iCell Maintenance Medium (CDI)	B27	CHIR99021	0-1	IWR1	2022-03-05	7	No glucose with lactate	2022-09-15	Flow cytometry for cTnT+	96					Yes	Yes							Fibrin	CM			100, 0, 0	RPMI-1640, B27, FBS, aminocaproic acid	Yes	TEM		1.8
	Pushp, P. et al. Functional comparison of beating cardiomyocytes differentiated from umbilical cord-derived mesenchymal/stromal stem cells and human foreskin-derived induced pluripotent stem cells. J Biomed Mater Res A 108, 496–514 (2020).	2020	Functional comparison of beating cardiomyocytes differentiated from umbilical cord-derived mesenchymal/stromal stem cells and human foreskin-derived induced pluripotent stem cells	J Biomed Mater Res A 108, 496–514 (2020)	https://doi.org/10.1002/jbm.a.36831		DF6-9-9T.B	1	NaN	NaN	Matrigel, Sythemax	mTeSR-1	85	iCell Maintenance Medium (CDI)	B27	CHIR99021	0-1	IWP2	2022-02-05	7			Flow cytometry for cTnT+	33									Yes			Electrospun fibers						DMEM	Yes
	Qian, F. et al. Simultaneous electrical recording of cardiac electrophysiology and contraction on chip. Lab Chip 17, 1732–1739 (2017).	2017	Simultaneous electrical recording of cardiac electrophysiology and contraction on chip	Lab Chip 17, 1732–1739 (2017)	https://doi.org/10.1039/c7lc00210f		iCell	1	NaN	NaN				iCell Maintenance Medium (CDI)															Yes							ECM-coated plastic/glass
	Qu, Y. et al. Inotropic assessment in engineered 3D cardiac tissues using human induced pluripotent stem cell-derived cardiomyocytes in the BiowireTM II platform. J Pharmacol Toxicol Methods 105, (2020).	2020	Inotropic assessment in engineered 3D cardiac tissues using human induced pluripotent stem cell-derived cardiomyocytes in the BiowireTM II platform	J Pharmacol Toxicol Methods 105, (2020)	https://doi.org/10.1016/j.vascn.2020.106886		iCell	1	NaN	NaN				iCell Maintenance Medium (CDI)	iCell Maintenance Medium (CDI)											Gelatin			Yes	Yes	Yes						Collagen + fibrin + matrigel	CM + SC	hCF		91, 0, 9								Post deflection
	Quach, B., Krogh-Madsen, T., Entcheva, E. & Christini, D. J. Light-Activated Dynamic Clamp Using iPSC-Derived Cardiomyocytes. Biophys J 115, 2206–2217 (2018).	2018	Light-Activated Dynamic Clamp Using iPSC-Derived Cardiomyocytes	Biophys J 115, 2206–2217 (2018)	https://doi.org/10.1016/j.bpj.2018.https://doi.org/10.018		Cor.4U	1	NaN	NaN				iCell Maintenance Medium (CDI)												Gelatin			Optical sitmulation							ECM-coated plastic/glass
	Querdel, E. et al. Human Engineered Heart Tissue Patches Remuscularize the Injured Heart in a Dose-Dependent Manner. Circulation 143, 1991–2006 (2021).	2021	Human Engineered Heart Tissue Patches Remuscularize the Injured Heart in a Dose-Dependent Manner	Circulation 143, 1991–2006 (2021)	https://doi.org/10.1161/CIRCULATIONAHA.120.047904		UKEi1-A, TC-1133, C25	3	NaN, Male, Female	NaN, NaN, Caucasian	Geltrex	FTDA	EB	iCell Maintenance Medium (CDI)	FBS, L-glutamine	Activin A, BMP4, bFGF	0-3	DS-I-7	2023-03-10	2023-06-10			Flow cytometry for cTnT+	83						Yes			Yes				Fibrin	CM			100, 0, 0	DMEM, heat-inactivated horse serum, aprotinin, insulin	Yes		Yes				Post deflection
	Rajamohan, D. et al. Automated electrophysiological and pharmacological evaluation of human pluripotent stem cell-derived cardiomyocytes. Stem Cells Dev 25, 439–452 (2016).	2016	Automated electrophysiological and pharmacological evaluation of human pluripotent stem cell-derived cardiomyocytes	Stem Cells Dev 25, 439–452 (2016)	https://doi.org/10.1089/scd.2015.0253		FIB-hiPSC, BT1-hiPSC	2	NaN, NaN	NaN, NaN	Matrigel	DMEM/F12, 15% KSR, 1% NEAA, 1% glutamax, 10uM B-mercaptoethanol, 8ng/mL bFGF		RPMI-1640	B27	Activin A, BMP4	0-2	KY02111	2022-02-04	4			Flow cytometry for cTnT+	91												ECM-coated plastic/glass							Yes
	Raval, K. K. et al. Pompe disease results in a Golgi-based glycosylation deficit in human induced pluripotent stem cell-derived cardiomyocytes. Journal of Biological Chemistry 290, 3121–3136 (2015).	2015	Pompe disease results in a Golgi-based glycosylation deficit in human induced pluripotent stem cell-derived cardiomyocytes	Journal of Biological Chemistry 290, 3121–3136 (2015)	https://doi.org/10.1074/jbc.M114.628628		GM20089, GM20123, GM04912	3	NaN, NaN, NaN	NaN, NaN, NaN	Matrigel	mTeSR-1		RPMI-1640	B27	CHIR99021	0-1	IWP2	2022-03-05	7			Flow cytometry for cTnT+	80		Gelatin			Yes								Fibrin	CM			100, 0, 0	RPMI-1640, B27	Yes	TEM					Force transducer
	Rehnelt, S. et al. Frequency-dependent multi-well cardiotoxicity screening enabled by optogenetic stimulation. Int J Mol Sci 18, (2017).	2017	Frequency-dependent multi-well cardiotoxicity screening enabled by optogenetic stimulation	Int J Mol Sci 18, (2017)	https://doi.org/10.3390/ijms18122634		Cor.4U	1	NaN	NaN				Cor.4U complete medium															Optical stimulation							ECM-coated plastic/glass						Cor.4U complete medium	Yes
	Richards, D. J. et al. Human cardiac organoids for the modelling of myocardial infarction and drug cardiotoxicity. Nat Biomed Eng 4, 446–462 (2020).	2020	Human cardiac organoids for the modelling of myocardial infarction and drug cardiotoxicity	Nat Biomed Eng 4, 446–462 (2020)	https://doi.org/10.1038/s41551-020-0539-4	GSE115031, GSE113871	iCell	2	NaN	NaN			EB	iCell Maintenance Medium (CDI)	iCell Maintenance Medium (CDI)											Gelatin											Scaffold free	CM + EC + SC	hCF, hADSC	HUVEC	50, 14, 36	DMEM/F12, FBS, NEAAs: FGM-3: EGM2	Yes						Motion tracking analysis
	Richards, D. J. et al. Inspiration from heart development: Biomimetic development of functional human cardiac organoids. Biomaterials 142, 112–123 (2017).	2017	Inspiration from heart development: Biomimetic development of functional human cardiac organoids	Biomaterials 142, 112–123 (2017)	https://doi.org/10.1016/j.biomaterials.2017.07.021		iCell	1	NaN	NaN				iCell Maintenance Medium (CDI)	iCell Maintenance Medium (CDI)											Gelatin											Scaffold free	CM + EC + SC	hCF	HUVEC	50, 10, 40	DMEM/F12, FBS, NEAAs: FGM-3: EGM2	Yes	SEM, TEM					Motion tracking analysis
	Richards, D. J. et al. Nanowires and electrical stimulation synergistically improve functions of hiPSC cardiac spheroids. Nano Lett 16, 4670–4678 (2016).	2016	Nanowires and electrical stimulation synergistically improve functions of hiPSC cardiac spheroids	Nano Lett 16, 4670–4678 (2016)	https://doi.org/10.1021/acs.nanolett.6b02093		iCell	1	NaN	NaN				iCell Maintenance Medium (CDI)	iCell Maintenance Medium (CDI)											Gelatin			Yes								Scaffold free					iCell Maintenance Medium (CDI)	Yes	TEM
	Rogers, A. J., Fast, V. G. & Sethu, P. Biomimetic Cardiac Tissue Model Enables the Adaption of Human Induced Pluripotent Stem Cell Cardiomyocytes to Physiological Hemodynamic Loads. Anal Chem 88, 9862–9868 (2016).	2016	Biomimetic Cardiac Tissue Model Enables the Adaption of Human Induced Pluripotent Stem Cell Cardiomyocytes to Physiological Hemodynamic Loads	Anal Chem 88, 9862–9868 (2016)	https://doi.org/10.1021/acs.analchem.6b03105		iCell	1	NaN	NaN				iCell Maintenance Medium (CDI)	iCell Maintenance Medium (CDI)											Gelatin						Flow		Yes		Micropatterned PDMS						iCell Maintenance Medium (CDI), High-glucose DMEM, FBS	Yes
	Ronaldson-Bouchard, K. et al. A multi-organ chip with matured tissue niches linked by vascular flow. Nat Biomed Eng 6, 351–371 (2022).	2022	A multi-organ chip with matured tissue niches linked by vascular flow	Nat Biomed Eng 6, 351–371 (2022)	https://doi.org/10.1038/s41551-022-00882-6		WTC11	1	Male	Asian	Matrigel	mTeSR-1	100	iCell Maintenance Medium (CDI)	B27	Activin A, BMP4	0-1	VEGF	2022-01-03	3			Flow cytometry for cTnT+	85					Yes	Yes	Yes						Fibrin	CM + SC	hDF		75, 0, 25	RPMI-1640, B27, L-ascorbic acid	Yes						Motion tracking analysis
	Ronaldson-Bouchard, K. et al. Advanced maturation of human cardiac tissue grown from pluripotent stem cells. Nature 556, 239–243 (2018).	2018	Advanced maturation of human cardiac tissue grown from pluripotent stem cells	Nature 556, 239–243 (2018)	https://doi.org/10.1038/s41586-018-0016-3		BS2, C2A, IMR-90, WTC11	4	NaN, NaN, Female, Male	NaN, NaN, NaN, Asian	Matrigel	mTeSR-1	100	iCell Maintenance Medium (CDI)	B27	Activin A, BMP4	0-3			3			Flow cytometry for cTnT+	85					Yes	Yes	Yes						Fibrin	CM + SC	hDF		75, 0, 25	RPMI-1640, B27, aprotinin	Yes	TEM		2.2	1500	Yes	Post deflection
	Roshanbinfar, K. et al. Carbon nanotube doped pericardial matrix derived electroconductive biohybrid hydrogel for cardiac tissue engineering. Biomater Sci 7, 3906–3917 (2019).	2019	Carbon nanotube doped pericardial matrix derived electroconductive biohybrid hydrogel for cardiac tissue engineering	Biomater Sci 7, 3906–3917 (2019)	https://doi.org/10.1039/c9bm00434c		F1	1	Male	NaN	Matrigel	E8	90	iCell Maintenance Medium (CDI)	B27	CHIR99021	0-2	IWR1	2022-03-05	7						Matrigel			Conductive material						Yes	Decellularized ECM, Electrically conductive hydrogel		CM			100, 0, 0	RPMI-1640, B27	Yes		Yes	1.7			Motion tracking analysis
	Ruan, J. L. et al. Mechanical Stress Conditioning and Electrical Stimulation Promote Contractility and Force Maturation of Induced Pluripotent Stem Cell-Derived Human Cardiac Tissue. Circulation 134, 1557–1567 (2016).	2016	Mechanical Stress Conditioning and Electrical Stimulation Promote Contractility and Force Maturation of Induced Pluripotent Stem Cell-Derived Human Cardiac Tissue	Circulation 134, 1557–1567 (2016)	https://doi.org/10.1161/CIRCULATIONAHA.114.014998		IBJ, IMR-90	2	NaN, Female	NaN, NaN	Matrigel	DMEM/F12, KOSR, NEAAs, sodium pyruvate, β-mercaptoethanol	80	iCell Maintenance Medium (CDI)	B27	Activin A, BMP4, CHIR99021, bFGF	0-2	XAV939, IWP2	2022-02-03				Flow cytometry for cTnT+	63		Matrigel				Yes	Yes	Yes					Collagen + Geltrex	CM + EC + SC	hiPSC-SMC	hiPSC-EC	58, 9, 15	RPMI-1640, B27	Yes						Force transducer
	Rupert, C. E., Irofuala, C. & Coulombe, K. L. K. Practical adoption of state-of-the-art hiPSC-cardiomyocyte differentiation techniques. PLoS One 15, (2020).	2020	Practical adoption of state-of-the-art hiPSC-cardiomyocyte differentiation techniques	PLoS One 15, (2020)	https://doi.org/10.1371/journal.pone.0230001		Gibco episomal, NCRM-5, WTC11	3	NaN, Male, Male	NaN, NaN, Asian	Vitronectin then Matrigel	E8		iCell Maintenance Medium (CDI)	B27	CHIR99021	0-1	IWP2	2022-03-05	9, not 13-17	No glucose with lactate	13-17	Flow cytometry for cTnT+	82						Yes	Yes						Collagen	CM + SC	hCF		95, 0, 5	RPMI-1640, B27							Force transducer
	Rupert, C. E., Kim, T. Y., Choi, B. R. & Coulombe, K. L. K. Human Cardiac Fibroblast Number and Activation State Modulate Electromechanical Function of hiPSC-Cardiomyocytes in Engineered Myocardium. Stem Cells Int 2020, (2020).	2020	Human Cardiac Fibroblast Number and Activation State Modulate Electromechanical Function of hiPSC-Cardiomyocytes in Engineered Myocardium	Stem Cells Int 2020, (2020)	https://doi.org/10.1155/2020/9363809		Gibco episomal	1	NaN	NaN	Vitronectin then Matrigel	E8	70	RPMI-1640	B27	CHIR99021	Not listed	IWP2	Not listed	7			Flow cytometry for cTnT+	52						Yes	Yes						Collagen	CM + SC	hCF		95, 0, 5	RPMI-1640, B27	Yes						Force transducer
	Saleem, U. et al. Blinded, Multicenter Evaluation of Drug-induced Changes in Contractility Using Human-induced Pluripotent Stem Cell-derived Cardiomyocytes. Toxicological Sciences 176, 103–123 (2020).	2020	Blinded, Multicenter Evaluation of Drug-induced Changes in Contractility Using Human-induced Pluripotent Stem Cell-derived Cardiomyocytes	Toxicological Sciences 176, 103–123 (2020)	https://doi.org/10.1093/toxsci/kfaa058		in-house, iCell2, Pluricyte	3	NaN, NaN, NaN	NaN, NaN, NaN				Pluricyte Cardiomyocyte Differentiation Kit (NCardia)		Activin A, BMP4, bFGF	0-3	DS-I-7	2023-03-10	6						Matrigel				Yes							Fibrin + matrigel	CM			100, 0, 0	DMEM, galactose, sodium pyruvate, Pluricyte Cardiomyocyte Medium							Post deflection
	Saleem, U. et al. Force and Calcium Transients Analysis in Human Engineered Heart Tissues Reveals Positive Force-Frequency Relation at Physiological Frequency. Stem Cell Reports 14, 312–324 (2020).	2020	Force and Calcium Transients Analysis in Human Engineered Heart Tissues Reveals Positive Force-Frequency Relation at Physiological Frequency	Stem Cell Reports 14, 312–324 (2020)	https://doi.org/10.1016/j.stemcr.2019.12.011		in-house	1	NaN	NaN	Geltrex	FTDA	EB	RPMI-1640	B27, HEPES, 1-thioglycerol	Activin A, BMP4, bFGF	0-3	DS-I-7	2022-03-10	7, not 10-13	1-Thioglycerol	2022-10-13	Flow cytometry for cTnT+							Yes							Fibrin	CM			100, 0, 0	DMEM, heat-inactivated horse serum, aprotinin, insulin	Yes						Post deflection
	Saludas, L. et al. Long-term engraftment of human cardiomyocytes combined with biodegradable microparticles induces heart repair. Journal of Pharmacology and Experimental Therapeutics 370, 761–771 (2019).	2019	Long-term engraftment of human cardiomyocytes combined with biodegradable microparticles induces heart repair	Journal of Pharmacology and Experimental Therapeutics 370, 761–771 (2019)	https://doi.org/10.1124/jpet.118.256065		Gibco episomal	1	NaN	NaN	Matrigel	E8	85	RPMI-1640	B27	CHIR99021	0-1	WntC-59	2022-03-05	7	No glucose with lactate	2022-09-12	Flow cytometry for cTnT+	90										Biodegradable and biomimetic microparticles		ECM-coated microparticles							Yes
	Sapp, V. et al. Genome-wide CRISPR/Cas9 screening in human iPS derived cardiomyocytes uncovers novel mediators of doxorubicin cardiotoxicity. Sci Rep 11, (2021).	2021	Genome-wide CRISPR/Cas9 screening in human iPS derived cardiomyocytes uncovers novel mediators of doxorubicin cardiotoxicity	Sci Rep 11, (2021)	https://doi.org/10.1038/s41598-021-92988-1		IPSL1	1	NaN	NaN	Matrigel	E8 Flex		RPMI-1640	B27	CHIR99021	0-1	Wnt-C59	2022-03-05	0	No glucose with lactate	15-25	Flow cytometry for cTnT+													ECM-coated plastic/glass
	Saraf, A. et al. Functional and molecular effects of TNF-α on human iPSC-derived cardiomyocytes. Stem Cell Res 52, (2021).	2021	Functional and molecular effects of TNF-? on human iPSC-derived cardiomyocytes	Stem Cell Res 52, (2021)	https://doi.org/10.1016/j.scr.2021.102218		SCVI-273, IMR-90	2	NaN, Female	NaN, NaN	Matrigel	KO-DMEM, KOSR, L-glutamine, NEAAs, bFGF, β-mercaptoethanol	85	RPMI-1640	B27	CHIR99021	0-2	IWR1	2022-02-04	5			IHC for a-actinin	85		Matrigel										ECM-coated plastic/glass						RPMI-1640, B27	Yes						Motion tracking analysis
	Sasaki, D. et al. Contractile force measurement of human induced pluripotent stem cell-derived cardiac cell sheet-tissue. PLoS One 13, (2018).	2018	Contractile force measurement of human induced pluripotent stem cell-derived cardiac cell sheet-tissue	PLoS One 13, (2018)	https://doi.org/10.1371/journal.pone.0198026		201B7	1	Female	Caucasian	MEF feeder cells	Primate ES Cell Medium	EB	DMEM	FBS	Activin A, BMP4, bFGF	0-4	IWR1	2022-04-06				Flow cytometry for cTnT+	95													Fibrin	CM			100, 0, 0		Yes						Force transducer
	Schaefer, J. A., Guzman, P. A., Riemenschneider, S. B., Kamp, T. J. & Tranquillo, R. T. A cardiac patch from aligned microvessel and cardiomyocyte patches. J Tissue Eng Regen Med 12, 546–556 (2018).	2018	A cardiac patch from aligned microvessel and cardiomyocyte patches	J Tissue Eng Regen Med 12, 546–556 (2018)	https://doi.org/10.1002/term.2568		DF19-9-11T.H	1	Male	NaN	Matrigel	mTeSR-1		DMEM/F12	NEAAs, β-mercaptoethanol, FBS	CHIR99021	0-1	IWP2	2023-03-05	7			Flow cytometry for cTnT+	85		FIbronectin					Yes		Yes				Fibrin	CM + EC + SC	hPC	BOEC	65, 29, 6	DMEM/F12, NEAAs, β-mercaptoethanol, FBS							Force transducer
	Schulz, A. et al. Tyramine-conjugated alginate hydrogels as a platform for bioactive scaffolds. J Biomed Mater Res A 107, 114–121 (2019).	2019	Tyramine-conjugated alginate hydrogels as a platform for bioactive scaffolds	J Biomed Mater Res A 107, 114–121 (2019)	https://doi.org/10.1002/jbm.a.36538		Cor.4U	1	NaN	NaN				Cor.4U complete medium												Matrigel							Yes	Yes		ECM-coated plastic/glass													Motion tracking analysis
	Schulze, M. L. et al. Dissecting hiPSC-CM pacemaker function in a cardiac organoid model. Biomaterials 206, 133–145 (2019).	2019	Dissecting hiPSC-CM pacemaker function in a cardiac organoid model	Biomaterials 206, 133–145 (2019)	https://doi.org/10.1016/j.biomaterials.2019.03.023		in-house	1	NaN	NaN			EB	RPMI-1640	B27	Activin A, BMP4, bFGF	0-3	DS-I-7	2022-03-10	7, not 10-13	1-Thioglycerol	2022-10-13	Flow cytometry for cTnT+	86													Scaffold free	CM			100, 0, 0		Yes
	Schwan, J. et al. Anisotropic engineered heart tissue made from laser-cut decellularized myocardium. Sci Rep 6, (2016).	2016	Anisotropic engineered heart tissue made from laser-cut decellularized myocardium	Sci Rep 6, (2016)	https://doi.org/10.1038/srep32068		in-house	1	NaN	NaN	Matrigel	mTeSR-1	90	RPMI-1640	B27	CHIR99021	0-1	IWP4	2022-03-05							Fibronectin	Yes	IGF-1, dexamethasone, T3		Yes			Yes		Yes		Decellularized tissue	CM			100, 0, 0	RPMI-1640, B27, T3, dexamethasone	Yes						Force transducer
	Sebastião, M. J. et al. Bioreactor-based 3D human myocardial ischemia/reperfusion in vitro model: a novel tool to unveil key paracrine factors upon acute myocardial infarction. Translational Research 215, 57–74 (2020).	2020	Bioreactor-based 3D human myocardial ischemia/reperfusion in vitro model: a novel tool to unveil key paracrine factors upon acute myocardial infarction	Translational Research 215, 57–74 (2020)	https://doi.org/10.1016/j.trsl.2019.09.001		DF19-9-11T.H	1	Male	NaN	Matrigel	mTeSR-1	85	RPMI-1640	B27	CHIR99021, Activin A	0-1	IWR1	2022-01-07	7			Flow cytometry for cTnT+	90	Pluricyte Medium		Yes	T3									Scaffold free	CM			100, 0, 0	Pluricyte Medium	Yes	TEM
	Shadrin, I. Y. et al. Cardiopatch platform enables maturation and scale-up of human pluripotent stem cell-derived engineered heart tissues. Nat Commun 8, (2017).	2017	Cardiopatch platform enables maturation and scale-up of human pluripotent stem cell-derived engineered heart tissues	Nat Commun 8, (2017)	https://doi.org/10.1038/s41467-017-01946-x		ATCC, BJ1	2	NaN, Male	NaN, NaN	Matrigel	TeSR-E8, mTeSR-1		RPMI-1640	B27	CHIR99021	0-1	IWP4	2022-03-05	7, not 10-12	No glucose with lactate	2022-10-12	Flow cytometry for cTnT+	86		Matrigel				Yes		Yes					Fibrin + matrigel	CM			100, 0, 0	RPMI-1460, B27, aminocaproic acid, L-ascorbic acid, 1-thioglycerol, NEAAs, sodium pyruvate	Yes	TEM				Yes	Force transducer
	Shanmughapriya, S. et al. FOXD1-dependent MICU1 expression regulates mitochondrial activity and cell differentiation. Nat Commun 9, (2018).	2018	FOXD1-dependent MICU1 expression regulates mitochondrial activity and cell differentiation	Nat Commun 9, (2018)	https://doi.org/10.1038/s41467-018-05856-4		iPS-GM942-SeV3, iPS-GM942-SeV5	2	NaN, NaN	NaN, NaN	Geltrex	mTeSR-1, iPS-Brew XF		RPMI-1640	B27								Flow cytometry for cTnT+			Gelatin										ECM-coated plastic/glass						RPMI-1640, B27
	Sharma, A. et al. High-throughput screening of tyrosine kinase inhibitor cardiotoxicity with human induced pluripotent stem cells. Sci Transl Med 9, (2017).	2017	High-throughput screening of tyrosine kinase inhibitor cardiotoxicity with human induced pluripotent stem cells	Sci Transl Med 9, (2017)	https://doi.org/10.1126/scitranslmed.aaf2584		in-house(2), iCell	11	NaN, NaN	NaN, NaN	Matrigel	E8	85	iCell Maintenance Medium (CDI)	iCell Maintenance Medium (CDI), glucose	CHIR99021	0-2	Wnt-C59	2022-02-05		No glucose with lactate					Matrigel, Gelatin										ECM-coated plastic/glass							Yes						Motion tracking analysis
	Shen, S. et al. Physiological calcium combined with electrical pacing accelerates maturation of human engineered heart tissue. Stem Cell Reports 17, 2037–2049 (2022).	2022	Physiological calcium combined with electrical pacing accelerates maturation of human engineered heart tissue	Stem Cell Reports 17, 2037–2049 (2022)	https://doi.org/10.1016/j.stemcr.2022.07.006	GSE201437	PGP1, in-house	2	Male, NaN	Caucasian, NaN	Matrigel	mTeSR-1		iCell Maintenance Medium (CDI)	B27	CHIR99021	0-1	IWP4	2022-03-05	6, not 12-16	No glucose with lactate	2022-12-16							Yes	Yes	Yes			Yes	Yes		Decellularized tissue	CM + SC	hCF		90, 0, 10	DMEM, FBS, NEAAs, L-glutamine, sodium-pyruvate							Force transducer
	Shinnawi, R. et al. Monitoring human-induced pluripotent stem cell-derived cardiomyocytes with genetically encoded calcium and voltage fluorescent reporters. Stem Cell Reports 5, 582–596 (2015).	2015	Monitoring human-induced pluripotent stem cell-derived cardiomyocytes with genetically encoded calcium and voltage fluorescent reporters	Stem Cell Reports 5, 582–596 (2015)	https://doi.org/10.1016/j.stemcr.2015.08.009		TRDSi002-A-1	1	Male	NaN	Matrigel	mTeSR-1	85	iCell Maintenance Medium (CDI)	B27	CHIR99021	0-2	IWR1	2022-03-05	11	No glucose	2022-11-15	Flow cytometry for cTnI+	88		Matrigel										ECM-coated plastic/glass						RPMI-1640, B27	Yes
	Silva, A. C. et al. Co-emergence of cardiac and gut tissues promotes cardiomyocyte maturation within human iPSC-derived organoids. Cell Stem Cell 28, 2137-2152.e6 (2021).	2021	Co-emergence of cardiac and gut tissues promotes cardiomyocyte maturation within human iPSC-derived organoids	Cell Stem Cell 28, 2137-2152.e6 (2021)	https://doi.org/10.1016/j.stem.2021.11.007		WTC11	1	Male	Asian	Matrigel	mTeSR-1	100	iCell Maintenance Medium (CDI)	B27	CHIR99021	0-1	IWP2	2022-03-05	7						Matrigel					Yes						Scaffold free		Mesendoderm progenitor cels			RPMI-1640, B27	Yes	TEM	Yes	1.75	2000
	Smith, A. S. T. et al. NanoMEA: A Tool for High-Throughput, Electrophysiological Phenotyping of Patterned Excitable Cells. Nano Lett 20, 1561–1570 (2020).	2020	NanoMEA: A Tool for High-Throughput, Electrophysiological Phenotyping of Patterned Excitable Cells	Nano Lett 20, 1561–1570 (2020)	https://doi.org/10.1021/acs.nanolett.9b04152		iCell	1	NaN	NaN				iCell Maintenance Medium (CDI)	iCell Maintenance Medium (CDI)								IHC a-actinin	90		Gelatin							Yes			MEA							Yes			1.95
	Strimaityte, D. et al. Contractility and Calcium Transient Maturation in the Human iPSC-Derived Cardiac Microfibers. ACS Appl Mater Interfaces 14, 35376–35388 (2022).	2022	Contractility and Calcium Transient Maturation in the Human iPSC-Derived Cardiac Microfibers	ACS Appl Mater Interfaces 14, 35376–35388 (2022)	https://doi.org/10.1021/acsami.2c07326		in-house WTC	1	NaN	NaN	Matrigel	E8	85	iCell Maintenance Medium (CDI)	B27	CHIR99021	0-2	IWR1	2022-03-05	7	No glucose	2022-12-14	Flow cytometry for cTnT+	90									Yes	Yes		Micropatterned PAA						RPMI-1640, B27	Yes			1.9		Yes	Motion tracking analysis
	Strober, B. J. et al. Dynamic genetic regulation of gene expression during cellular differentiation.	2019	Dynamic genetic regulation of gene expression during cellular differentiation		https://doi.org/10.1126/science.aaw0040		in-house	19	NaN	NaN	Matrigel	E8	85	iCell Maintenance Medium (CDI)	B27	CHIR99021	0-1	Wnt-C59	2022-03-05				Flow cytometry for cTnT+	40.4												ECM-coated plastic/glass							Yes		Yes
	Sun, S. et al. Progressive Myofibril Reorganization of Human Cardiomyocytes on a Dynamic Nanotopographic Substrate. ACS Appl Mater Interfaces 12, 21450–21462 (2020).	2020	Progressive Myofibril Reorganization of Human Cardiomyocytes on a Dynamic Nanotopographic Substrate	ACS Appl Mater Interfaces 12, 21450–21462 (2020)	https://doi.org/10.1021/acsami.0c03464		WTC11	1	Male	Asian	Geltrex	E8	100	iCell Maintenance Medium (CDI)	B27	CHIR99021	0-2	IWP4	2022-02-04	6, not 22-28	No glucose with lactate	22-28				Geltrex							Yes	Yes		Nanotopography (Shape memory polymers (SMP) Poly(tBA-co-BA) PEM coated with wrinkles)						RPMI-1640, B27	Yes	SEM	Yes	2	1500		Motion tracking analysis
	Sung, T. C. et al. Transient characteristics of universal cells on human-induced pluripotent stem cells and their differentiated cells derived from foetal stem cells with mixed donor sources. Cell Prolif 54, (2021).	2021	Transient characteristics of universal cells on human-induced pluripotent stem cells and their differentiated cells derived from foetal stem cells with mixed donor sources	Cell Prolif 54, (2021)	https://doi.org/10.1158/0008-5472.CAN-24-0642		454E2, in-house (3)	4	NaN, NaN	NaN, NaN	Vitronectin	E8	85	iCell Maintenance Medium (CDI)	B27	CHIR99021	0-2	IWR1	2023-04-06	7																ECM-coated plastic/glass							Yes
	Takada, T. et al. Aligned human induced pluripotent stem cell-derived cardiac tissue improves contractile properties through promoting unidirectional and synchronous cardiomyocyte contraction. Biomaterials 281, (2022).	2022	Aligned human induced pluripotent stem cell-derived cardiac tissue improves contractile properties through promoting unidirectional and synchronous cardiomyocyte contraction	Biomaterials 281, (2022)	https://doi.org/10.1016/j.biomaterials.2021.121351		201B7	1	Female	Caucasian	MEF feeder cells	Primate ES Cell Medium	EB	DMEM	FBS	Activin A, BMP4, bFGF	0-4	IWR1	2023-04-06		Puromycin		Flow cytometry for cTnT+	89									Yes			Microgrooves						DMEM, FBS	Yes		Yes				Motion tracking analysis, force transducer
	Takeda, M. et al. Development of in vitro drug-induced cardiotoxicity assay by using three-dimensional cardiac tissues derived from human induced pluripotent stem cells. Tissue Eng Part C Methods 24, 56–67 (2018).	2018	Development of in vitro drug-induced cardiotoxicity assay by using three-dimensional cardiac tissues derived from human induced pluripotent stem cells	Tissue Eng Part C Methods 24, 56–67 (2018)	https://doi.org/10.1016/j.biomaterials.2021.121351		253G1	1	NaN	NaN	MEF feeder cells	Primate ES Cell medium		DMEM	FBS	Activin A, BMP4, bFGF	0-4	IWR1	2022-04-06																		Fibronectin/gelatin nano films	CM			100, 0, 0	DMEM, FBS	Yes						Motion tracking analysis
	Tamargo, M. A. et al. MilliPillar: A Platform for the Generation and Real-Time Assessment of Human Engineered Cardiac Tissues. ACS Biomater Sci Eng 7, 5215–5229 (2021).	2021	MilliPillar: A Platform for the Generation and Real-Time Assessment of Human Engineered Cardiac Tissues	ACS Biomater Sci Eng 7, 5215–5229 (2021)	https://doi.org/10.1021/acsbiomaterials.1c01006		WTC11, BS2	2	Male, NaN	Asian, NaN	Synthemax II-SC, Matrigel	E8	85	RPMI-1640	B27, L-ascorbic acid	CHIR99021	0-2	Wnt-C59	2022-02-04	10	No glucose	2022-10-13	Flow cytometry for cTnT+	85					Yes	Yes	Yes						Fibrin or collagen	CM + SC	hCF;hDF		75, 0, 25	RPMI-1640, B27, L-ascorbic acid	Yes		Yes				Post deflection
	Tan, Y. et al. Cell number per spheroid and electrical conductivity of nanowires influence the function of silicon nanowired human cardiac spheroids. Acta Biomater 51, 495–504 (2017).	2017	Cell number per spheroid and electrical conductivity of nanowires influence the function of silicon nanowired human cardiac spheroids	Acta Biomater 51, 495–504 (2017)	https://doi.org/10.1016/j.actbio.2017.01.029		iCell	1	NaN	NaN				iCell Maintenance Medium (CDI)	iCell Maintenance Medium (CDI)											Gelatin										ECM-coated plastic/glass	Scaffold free	CM			100, 0, 0	iCell Maintenance Medium (CDI)	Yes	TEM
	Tan, Y. et al. Silicon nanowire-induced maturation of cardiomyocytes derived from human induced pluripotent stem cells. Nano Lett 15, 2765–2772 (2015).	2015	Silicon nanowire-induced maturation of cardiomyocytes derived from human induced pluripotent stem cells	Nano Lett 15, 2765–2772 (2015)	https://doi.org/10.1021/nl502227a		iCell	1	NaN	NaN				iCell Maintenance Medium (CDI)	iCell Maintenance Medium (CDI)											Gelatin											Scaffold free	CM + NRCM			100, 0, 0	iCell Maintenance Medium (CDI)	Yes	TEM	Yes	1.8
	Tang, Y. et al. Induction and differentiation of human induced pluripotent stem cells into functional cardiomyocytes on a compartmented monolayer of gelatin nanofibers. Nanoscale 8, 14530–14540 (2016).	2016	Induction and differentiation of human induced pluripotent stem cells into functional cardiomyocytes on a compartmented monolayer of gelatin nanofibers	Nanoscale 8, 14530–14540 (2016)	https://doi.org/10.1039/c6nr04545f		253G1	1	NaN	NaN	Vitronectin	E8		iCell Maintenance Medium (CDI)	B27	CHIR99021	0-1	IWP2	2022-03-05	8			Flow cytometry for cTnT+	75									Yes			Electrospun fibers							Yes
	Thavandiran, N. et al. Functional arrays of human pluripotent stem cell-derived cardiac microtissues. Sci Rep 10, (2020).	2020	Functional arrays of human pluripotent stem cell-derived cardiac microtissues	Sci Rep 10, (2020)	https://doi.org/10.1038/s41598-020-62955-3		iPSCTF	1	NaN	NaN	Matrigel	HES2 maintenance media, mTeSR-1	90	iCell Maintenance Medium (CDI)	B27, GlutaMax, HEPES	CHIR99021	0-1	IWP2 and proprietary tankyrase inhibitor	2022-03-05	5			Flow cytometry for cTnT+			Synthemax II-SC				Yes	Yes						Collagen	CM + SC	hCF		100, 0, 10	RPMI-1640, B27, HEPES, GlutaMax	Yes						Post deflection
	Thomas, T. et al. Extrusion 3D Printing of Porous Silicone Architectures for Engineering Human Cardiomyocyte-Infused Patches Mimicking Adult Heart Stiffness. ACS Appl Bio Mater 3, 5865–5871 (2020).	2020	Extrusion 3D Printing of Porous Silicone Architectures for Engineering Human Cardiomyocyte-Infused Patches Mimicking Adult Heart Stiffness	ACS Appl Bio Mater 3, 5865–5871 (2020)	https://doi.org/10.1021/acsabm.0c00572		PGP1	1	Male	Caucasian	Matrigel	mTeSR-1	85	iCell Maintenance Medium (CDI)	B27	CHIR99021	0-3	IWP4	2022-03-04	9			Not listed	90									Yes				3D printed silicone macroporous silicone scaffold	CM			100, 0, 0	RPMI-1640, B27, FBS	Yes
	Tiburcy, M. et al. Defined engineered human myocardium with advanced maturation for applications in heart failure modeling and repair. Circulation 135, 1832–1847 (2017).	2017	Defined engineered human myocardium with advanced maturation for applications in heart failure modeling and repair	Circulation 135, 1832–1847 (2017)	https://doi.org/10.1161/CIRCULATIONAHA.116.024145		BJ1, hiPS-G1	2	Male, NaN	NaN, NaN	Matrigel	mTeSR-E8 or KO-DMEM, KOSR, L-glutamine, NEAAs, human foreskin fibroblast conditioned media, bFGF		iCell Maintenance Medium (CDI)	B27, L-ascorbic acid	Activin A, BMP4, CHIR99021, bFGF	0-3	IWP4	2022-04-13	17	No glucose and lactate	13-17	Flow cytometry for a-actinin+	94						Yes	Yes						Collagen + matrigel	CM + SC	hCF		70, 0, 30	Isocove medium, B27, IGF-1, bFGF, VEGF, TGFB1, NEAAs, L-glutamine	Yes	EM		1.95			Post deflection
	Toepfer, C. N. et al. Myosin Sequestration Regulates Sarcomere Function, Cardiomyocyte Energetics, and Metabolism, Informing the Pathogenesis of Hypertrophic Cardiomyopathy. Circulation 828–842 (2020).	2020	Myosin Sequestration Regulates Sarcomere Function, Cardiomyocyte Energetics, and Metabolism, Informing the Pathogenesis of Hypertrophic Cardiomyopathy	Circulation 828–842 (2020)	https://doi.org/10.1161/CIRCULATIONAHA.119.042339		PGP1	1	Male	Caucasian	Matrigel	mTeSR-1	90	iCell Maintenance Medium (CDI)	B27	CHIR99021	0-1	Wnt-C59	2022-03-05	7	No glucose	2022-09-11				Matrigel										ECM-coated plastic/glass							Yes				2000
	Toepfer, C. N. et al. SarcTrack. Circ Res 124, 1172–1183 (2019).	2019	SarcTrack	Circ Res 124, 1172–1183 (2019)	https://doi.org/10.1161/CIRCRESAHA.118.31450		PGP1	1	Male	Caucasian	Matrigel	mTeSR-1		iCell Maintenance Medium (CDI)	B27	CHIR99021	0-1	IWP4	2022-03-05	7	No glucose with lactate	2022-10-12				Matrigel										ECM-coated plastic/glass							Yes			1.93			Motion tracking analysis; TFM
	Tomov, M. L. et al. Distinct and Shared Determinants of Cardiomyocyte Contractility in Multi-Lineage Competent Ethnically Diverse Human iPSCs. Sci Rep 6, (2016).	2016	Distinct and Shared Determinants of Cardiomyocyte Contractility in Multi-Lineage Competent Ethnically Diverse Human iPSCs	Sci Rep 6, (2016)	https://doi.org/10.1038/srep37637		in-house	1	NaN	NaN	StemAdhere	mTeSR2, TeSR-E8		iCell Maintenance Medium (CDI)	B27	CHIR99021	0-1	IWP2	2022-03-05														Yes			Micropatterned PDMS							Yes
	Treat, J. A., Goodrow, R. J., Bot, C. T., Haedo, R. J. & Cordeiro, J. M. Pharmacological enhancement of repolarization reserve in human induced pluripotent stem cells derived cardiomyocytes. Biochem Pharmacol 169, (2019).	2019	Pharmacological enhancement of repolarization reserve in human induced pluripotent stem cells derived cardiomyocytes	Biochem Pharmacol 169, (2019)	https://doi.org/10.1016/j.bcp.2019.08.010		WiCell	1	NaN	NaN	Matrigel	E8		RPMI-1640	B27, T3, dexamethasone	CHIR99021	0-2	IWP2, KY0211	2022-02-06	8	No glucose with lactate	2022-12-14				Matrigel										MEA
	Tsan, Y. C. et al. Physiologic biomechanics enhance reproducible contractile development in a stem cell derived cardiac muscle platform. Nat Commun 12, (2021).	2021	Physiologic biomechanics enhance reproducible contractile development in a stem cell derived cardiac muscle platform	Nat Common 12, (2021)	https://doi.org/10.1038/s41467-021-26496-1		MR18, MR30, MR48, WTC11, DF19-9-11T.H	5	NaN, NaN, NaN, Male, Male	NaN, NaN, NaN, Asian, NaN	Matrigel	StemFlex		RPMI-1640	B27	CHIR99021	0-1	IWP4	2022-03-10	6, not 12-16	No glucose with lactate	2022-12-16	IHC a-actinin	95	RPMI-1640, DMEM, galactose, lactate, GlutaMax, pyruvate, T3, dexamethasone, torin1	Matrigel	Yes	T3, dexamethasone, Torin1					Yes	Yes		Micropatterned PDMS						RPMI-1640, DMEM, galactose, lactate, GlutaMax, pyruvate	Yes		Yes	2.1			Motion tracking analysis
	Tsui, J. H. et al. Tunable electroconductive decellularized extracellular matrix hydrogels for engineering human cardiac microphysiological systems. Biomaterials 272, (2021).	2021	Tunable electroconductive decellularized extracellular matrix hydrogels for engineering human cardiac microphysiological systems	Biomaterials 272, (2021)	https://doi.org/10.1016/j.biomaterials.2021.120764		UC3-4 A1	1	NaN	NaN	Matrigel	mTeSR-1		RPMI-1640	B27	CHIR99021	0-1	IWP4	2022-03-05	7			Flow cytometry for cTnT+	90					Conductive		Yes				Yes		Decellularized tissue	CM + SC	hMSC		80, 0, 20	RPMI-1640, B27	Yes			2.1			Post deflection
	Tsukamoto, Y., Akagi, T. & Akashi, M. Vascularized cardiac tissue construction with orientation by layer-by-layer method and 3D printer. Sci Rep 10, (2020).	2020	Vascularized cardiac tissue construction with orientation by layer-by-layer method and 3D printer	Sci Rep 10, (2020)	https://doi.org/10.1038/s41598-020-59371-y		253G1	1	NaN	NaN	MEF feeder cells	DMEM/F12 medium, supplemented with 20% (v/v) KSR, 0.1 mM 2-mercaptoethanol, MEM non-essential amino acids, and 2 mM L-glutamine with 4 ng/ml FGF-2	EB	DMEM	FBS	Activin A, BMP4, bFGF	0-2	IWR1, IWP2	2023-02-04				IHC cTnT	90							Yes						3D printing, cell spheroids coated in fibronectin and gelatin solution	CM + EC + SC	hCF	CMVEC	37.5, 50, 12.5	DMEM, FBS	Yes		Yes				Motion tracking analysis
	Ulmer, B. M. et al. Contractile Work Contributes to Maturation of Energy Metabolism in hiPSC-Derived Cardiomyocytes. Stem Cell Reports 10, 834–847 (2018).	2018	Contractile Work Contributes to Maturation of Energy Metabolism in hiPSC-Derived Cardiomyocytes	Stem Cell Reports 10, 834–847 (2018)	https://doi.org/10.1016/j.stemcr.2018.01.039		C25, UKEi003-C	2	Female, Female	Caucasian, Caucasian	Geltrex	FTDA	EB	RPMI-1640	B27, HEPES, 1-thioglycerol	Activin A, BMP4, bFGF	0-3	DS-I-7	2022-03-06	6, not 9-12			Flow cytometry for cTnT+	77						Yes							Fibrin	CM			100, 0, 0	DMEM, heat-inactivated horse serum, aprotinin, insulin		TEM					Motion tracking analysis
	Uzun, A. U. et al. Ca2+-currents in human induced pluripotent stem cell-derived cardiomyocytes effects of two different culture conditions. Front Pharmacol 7, (2016).	2016	Ca2+-currents in human induced pluripotent stem cell-derived cardiomyocytes effects of two different culture conditions	Front Pharmacol 7, (2016)	https://doi.org/10.3389/fphar.2016.00300		in-house	1	NaN	NaN		FTDA	EB			Activin A, BMP4, bFGF	0-3	DS07																		ECM-coated plastic/glass	Fibrin + matrigel	CM			100, 0, 0	DMEM, heat-inactivated horse serum, aprotinin, insulin
	Vaidyanathan, R. et al. I K1-enhanced human-induced pluripotent stem cell-derived cardiomyocytes: an improved cardiomyocyte model to investigate inherited arrhythmia syndromes. Am J Physiol Heart Circ Physiol 310, 1611–1621 (2016).	2016	I K1-enhanced human-induced pluripotent stem cell-derived cardiomyocytes: an improved cardiomyocyte model to investigate inherited arrhythmia syndromes	Am J Physiol Heart Circ Physiol 310, 1611–1621 (2016)	https://doi.org/10.1152/ajpheart.00481.2015		iCell	1	NaN	NaN				iCell Maintenance Medium (CDI)	iCell Maintenance Medium (CDI)											Laminin			Adenoviral transfection to enhance IK1 in hiPSC-CMs							ECM-coated plastic/glass							Yes				1900
	Valarmathi, M. T., Fuseler, J. W., Davis, J. M. & Price, R. L. A novel human tissue-engineered 3-D functional vascularized cardiac muscle construct. Front Cell Dev Biol 5, (2017).	2017	A novel human tissue-engineered 3-D functional vascularized cardiac muscle construct	Front Cell Dev Biol 5, (2017)	https://doi.org/10.3389/fcell.2017.00002		iCell	1	NaN	NaN				iCell Maintenance Medium (CDI)	iCell Maintenance Medium (CDI)											Gelatin											Collagen	CM + EC + SC	hMSC	hiPSC-EC	65, 32, 3	DMEM, horse serum, newborn calf serum	Yes	SEM, TEM
	Valls-Margarit, M. et al. Engineered Macroscale Cardiac Constructs Elicit Human Myocardial Tissue-like Functionality. Stem Cell Reports 13, 207–220 (2019).	2019	Engineered Macroscale Cardiac Constructs Elicit Human Myocardial Tissue-like Functionality	Stem Cell Reports 13, 207–220 (2019)	https://doi.org/10.1016/j.stemcr.2019.05.024		ESi044-A	1	Male	Caucasian	Matrigel	mTeSR-1	100	iCell Maintenance Medium (CDI)	B27, L-glutamine, β-mercaptoethanol, NEAAs	CHIR99021	0-1	IWP4	2022-03-05	7			Flow cytometry for cTnI	72					Yes		Yes	Yes					Collagen + elastin	CM + SC	hFF		90, 0, 10	RPMI-1640, B27	Yes	TEM					Motion tracking analysis
	van Meer, B. J. et al. Simultaneous measurement of excitation-contraction coupling parameters identifies mechanisms underlying contractile responses of hiPSC-derived cardiomyocytes. Nat Commun 10, (2019).	2019	Simultaneous measurement of excitation-contraction coupling parameters identifies mechanisms underlying contractile responses of hiPSC-derived cardiomyocytes	Nat Commun 10, (2019)	https://doi.org/10.1038/s41467-019-12354-8		Pluricyte	1	NaN	NaN				iCell Maintenance Medium (CDI)												Matrigel										ECM-coated plastic/glass
	Vannozzi, L. et al. Self-Folded Hydrogel Tubes for Implantable Muscular Tissue Scaffolds. Macromol Biosci 18, (2018).	2018	Self-Folded Hydrogel Tubes for Implantable Muscular Tissue Scaffolds	Macromol Biosci 18, (2018)	https://doi.org/10.1002/mabi.201700377		Cor.4U	1	NaN	NaN				iCell Maintenance Medium (CDI)																		Yes		Yes			PEG						Yes						Motion tracking analysis
	Wang, C. et al. Maladaptive Contractility of 3D Human Cardiac Microtissues to Mechanical Nonuniformity. Adv Healthc Mater 9, (2020).	2020	Maladaptive Contractility of 3D Human Cardiac Microtissues to Mechanical Nonuniformity	Adv Healthc Mater 9, (2020)	https://doi.org/10.1002/adhm.201901373		WTC11	1	Male	Asian	Matrigel	E8		iCell Maintenance Medium (CDI)	B27	CHIR99021	0-1	IWP2	2022-03-05	7, not 20-24	No glucose with lactate	20-24				Matrigel							Yes				3D filamentous matrices composed of three layers of micronscale parallel fibers	CM			100, 0, 0	RPMI-1640, B27	Yes						Motion tracking analysis
	Wang, J. et al. Graphene Sheet-Induced Global Maturation of Cardiomyocytes Derived from Human Induced Pluripotent Stem Cells. ACS Appl Mater Interfaces 9, 25929–25940 (2017).	2017	Graphene Sheet-Induced Global Maturation of Cardiomyocytes Derived from Human Induced Pluripotent Stem Cells	ACS Appl Mater Interfaces 9, 25929–25940 (2017)	https://doi.org/10.1021/acsami.7b08777		KB3, NC5	2	NaN, NaN	NaN, NaN	Matrigel	mTeSR-1	87.5	iCell Maintenance Medium (CDI)	B27	CHIR99021	0-1	IWR1	2022-03-04										Conductive material							ECM-coated plastic/glass							Yes	SEM, TEM		1.8
	Wang, Q. et al. Functional engineered human cardiac patches prepared from nature’s platform improve heart function after acute myocardial infarction. Biomaterials 105, 52–65 (2016).	2016	Functional engineered human cardiac patches prepared from natureÃ‚Â’s platform improve heart function after acute myocardial infarction	Biomaterials 105, 52–65 (2016)	https://doi.org/10.1016/j.biomaterials.2016.07.035		in-house	2	NaN	NaN	Matrigel	mTeSR-1	90	iCell Maintenance Medium (CDI)	B27	CHIR99021	0-1	IWR1	2022-01-05	7			Flow cytometry for cTnT+	90													Decellularized tissue	CM + EC + SC	hiPSC-SC		75, 0, 25	RPMI-1640, B27	Yes	TEM
	Wanjare, M. et al. Anisotropic microfibrous scaffolds enhance the organization and function of cardiomyocytes derived from induced pluripotent stem cells. Biomater Sci 5, 1567–1578 (2017).	2017	Anisotropic microfibrous scaffolds enhance the organization and function of cardiomyocytes derived from induced pluripotent stem cells	Biomater Sci 5, 1567–1578 (2017)	https://doi.org/10.1039/c7bm00323d		P356	1	NaN	NaN	Geltrex	E8		iCell Maintenance Medium (CDI)	B27	CHIR99021	0-2	IWR1	2022-02-04	7	No glucose with lactate	2022-09-15	IHC cTnT	80							Yes		Yes			Electrospun fibers						RPMI-1640	Yes		Yes	1.6			Motion tracking analysis
	Wei, L., Li, W., Entcheva, E. & Li, Z. Microfluidics-enabled 96-well perfusion system for high-throughput tissue engineering and long-term all-optical electrophysiology. Lab Chip 20, 4031–4042 (2020).	2020	Microfluidics-enabled 96-well perfusion system for high-throughput tissue engineering and long-term all-optical electrophysiology	Lab Chip 20, 4031–4042 (2020)	https://doi.org/10.1039/d0lc00615g		iCell	1	NaN	NaN				iCell Maintenance Medium (CDI)	iCell Maintenance Medium (CDI)											Fibronectin			Optical stimulation			Flow				ECM-coated plastic/glass							Yes
	Weinberger, F. et al. Cardiac repair in guinea pigs with human engineered heart tissue from induced pluripotent stem cells. Sci Trans Med 8, (2016).	2016	Cardiac repair in guinea pigs with human engineered heart tissue from induced pluripotent stem cells	Sci Trans Med 8, (2016)	https://doi.org/10.1126/scitranslmed.aaf8781		C25	1	Female	Caucasian	Geltrex	MEF-conditioned medium	EB	RPMI-1640	B27, HEPES, 1-thioglycerol	Activin A, BMP4, bFGF	0-3	DS-I-7	2022-04-11	7			Flow cytometry for cTnT+, Flow cytometry for a-actinin+	83						Yes	Yes						Fibrin	CM + EC		hiPSC-EC	71, 29, 0	DMEM, heat-inactivated horse serum, aprotinin, insulin	Yes
	Wendel, J. S. et al. Functional Effects of a Tissue-Engineered Cardiac Patch From Human Induced Pluripotent Stem Cell-Derived Cardiomyocytes in a Rat Infarct Model. Stem Cells Transl Med 4, 1324–1332 (2015).	2015	Functional Effects of a Tissue-Engineered Cardiac Patch From Human Induced Pluripotent Stem Cell-Derived Cardiomyocytes in a Rat Infarct Model	Stem Cells Transl Med 4, 1324–1332 (2015)	https://doi.org/10.5966/sctm.2015-0044		DF19-9-11T.H	1	Male	NaN				DMEM/F12	NEAAs, β-mercaptoethanol, FBS	CHIR99021	0-1	IWP2	2022-03-05	8, not 19-23	No glucose with lactate	2022-10-23	Flow cytometry for cTnT+	94		Fibronectin					Yes						Fibrin	CM + SC	hPC		86, 0, 14	DMEM/F12, FBS, aminocaproic acid	Yes						Motion tracking analysis
	Weng, K. C. et al. Human Induced Pluripotent Stem-Cardiac-Endothelial-Tumor-on-a-Chip to Assess Anticancer Efficacy and Cardiotoxicity. Tissue Eng Part C Methods 26, 44–55 (2020).	2020	Human Induced Pluripotent Stem-Cardiac-Endothelial-Tumor-on-a-Chip to Assess Anticancer Efficacy and Cardiotoxicity	Tissue Eng Part C Methods 26, 44–55 (2020)	https://doi.org/10.1089/ten.TEC.2019.0248		in-house	1	NaN	NaN		E8		RPMI-1640		CHIR99021	0-2	IWP2	2022-03-05	7, not 13-21	No glucose with lactate	13-21							Yes		Yes						Fibrin	CM + EC (+ tumor)	colon adenocarcinoma (SW620)	hiPSC-EC	77, 23, 0	EGM2	Yes
	Werley, C. A. et al. Geometry-dependent functional changes in iPSC-derived cardiomyocytes probed by functional imaging and RNA sequencing. PLoS One 12, e0172671 (2017).	2017	Geometry-dependent functional changes in iPSC-derived cardiomyocytes probed by functional imaging and RNA sequencing	PLoS One 12, e0172671 (2017)	https://doi.org/10.1371/journal.pone.0172671		iCell	1	NaN	NaN				iCell Maintenance Medium	iCell Maintenance Medium (CDI)											Fibronectin							Yes	Yes		ECM-coated plastic/glass							Yes
	Wheelwright, M. et al. Investigation of human iPSC-derived cardiac myocyte functional maturation by single cell traction force microscopy. PLoS One 13, (2018).	2018	Investigation of human iPSC-derived cardiac myocyte functional maturation by single cell traction force microscopy	PLoS One 13, (2018)	https://doi.org/10.1371/journal.pone.0194909		DF19-9-11T.H	1	Male	NaN	Matrigel	TeSR-E8	90	RPMI-1640	B27, HEPES	CHIR99021	0-1	IWP4	2022-03-05	7					RPMI-1640, B27 with 1.8 mM Ca2+				Calcium concentration				Yes	Yes		Micropatterned PAA gel							Yes				1200		TFM
	Wickramasinghe, N. M. et al. PPARdelta activation induces metabolic and contractile maturation of human pluripotent stem cell-derived cardiomyocytes. Cell Stem Cell 29, 559-576.e7 (2022).	2022	PPARdelta activation induces metabolic and contractile maturation of human pluripotent stem cell-derived cardiomyocytes	Cell Stem Cell 29, 559-576.e7 (2022)	https://doi.org/10.1016/j.stem.2022.02.011		ISMMSi005-B, WTC11	2	NaN, Male	NaN, Asian	Matrigel	E8	EBs	RPMI-1640	L-ascorbic acid, L-glutamine, 1-thioglycerol	Activin A, BMP4, bFGF	0-2	XAV939	2022-02-04		No glucose with lactate	24-28	Flow cytometry for SIRPA		RPMI-1640, L-glutamine, thioglycerol-1, L-ascorbic acid, aprotinin, GSK0660, GW0742, Rosiglitazone, WY14643, LCFAs, palmitic acid, oleic acid, linoleic acid	Matrigel	Signal perturbation	LCFAs, T3, GW6471, GSK0660, GW9662		Yes							Fibrin	CM			100, 0, 0	RPMI-1640, L-glutamine, thioglycerol-1, L-ascorbic acid, aprotinin	Yes	TEM	Yes	1.6			Post deflection
	Williams, K. et al. A 3-D human model of complex cardiac arrhythmias. Acta Biomater 132, 149–161 (2021).	2021	A 3-D human model of complex cardiac arrhythmias	Acta Biomater 132, 149–161 (2021)	https://doi.org/10.1016/j.actbio.2021.03.004		iCell, iPSC-CM Lonza	2	NaN, NaN	NaN, NaN																				Yes	Yes						Fibrin + matrigel	CM + SC	hCF		75, 0, 25	StemPro-34 Serum Free Media, L-glutamine, L-ascorbic acid, transferrin, 1-thioglycerol	Yes						Rod deflection
	Wnorowski, A. et al. Effects of Spaceflight on Human Induced Pluripotent Stem Cell-Derived Cardiomyocyte Structure and Function. Stem Cell Reports 13, 960–969 (2019).	2019	Effects of Spaceflight on Human Induced Pluripotent Stem Cell-Derived Cardiomyocyte Structure and Function	Stem Cell Reports 13, 960–969 (2019)	https://doi.org/10.1016/j.stemcr.2019.https://doi.org/10.006	GSE137081	in-house	3	NaN	NaN	Matrigel	E8	85	RPMI-1640	B27	CHIR99021	0-2	IWR1	2022-03-05	7	No glucose	2022-09-12				Matrigel										ECM-coated plastic/glass						RPMI-1640, B27, GlutaMax, HEPES	Yes		Yes	1.75			Motion tracking analysis
	Wong, A. O. T. et al. Correlation between frataxin expression and contractility revealed by in vitro Friedreich’s ataxia cardiac tissue models engineered from human pluripotent stem cells. Stem Cell Res Ther 10, (2019).	2019	Correlation between frataxin expression and contractility revealed by in vitro FriedreichÃ‚Â’s ataxia cardiac tissue models engineered from human pluripotent stem cells	Stem Cell Res Ther 10, (2019)	https://doi.org/10.1186/s13287-019-1305-y		PB02	1	NaN	NaN	Matrigel, Geltrex	mTeSR-1, E8	EB	StemPro-34	L-ascorbic acid	Activin A, BMP4	0-3	IWR1	2023-04-07				Flow cytometry for cTnT+	77						Yes	Yes					Microgrooves	Collagen + matrigel	CM + SC	hFF		91, 0, 9	DMEM, newborn calf serum							Post deflection
	Wu, H. et al. Epigenetic Regulation of Phosphodiesterases 2A and 3A Underlies Compromised β-Adrenergic Signaling in an iPSC Model of Dilated Cardiomyopathy. Cell Stem Cell 17, 89–100 (2015).	2015	Epigenetic Regulation of Phosphodiesterases 2A and 3A Underlies Compromised ?-Adrenergic Signaling in an iPSC Model of Dilated Cardiomyopathy	Cell Stem Cell 17, 89–100 (2015)	https://doi.org/10.1016/j.stem.2015.04.020		in-house	3	NaN	NaN	Matrigel	E8		RPMI-1640	B27	CHIR99021	0-2	IWR1	2022-03-05	7	No glucose	2022-09-11	Flow cytometry for cTnT+	90		Matrigel										ECM-coated plastic/glass							Yes
	Wu, K. H. et al. Efficient generation of functional cardiomyocytes from human umbilical cord-derived virus-free induced pluripotent stem cells. Cell Tissue Res 374, 275–283 (2018).	2018	Efficient generation of functional cardiomyocytes from human umbilical cord-derived virus-free induced pluripotent stem cells	Cell Tissue Res 374, 275–283 (2018)	https://doi.org/10.1007/s00441-018-2875-1		in-house	1	NaN	NaN	Matrigel	mTeSR-1	100	RPMI-1640	B27	Activin A	0-1	BMP4, bFGF	2022-01-05	5			IHC a-actinin and cTnT	80												ECM-coated plastic/glass							Yes
	Xu, C. et al. Bioinspired onion epithelium-like structure promotes the maturation of cardiomyocytes derived from human pluripotent stem cells. Biomater Sci 5, 1810–1819 (2017).	2017	Bioinspired onion epithelium-like structure promotes the maturation of cardiomyocytes derived from human pluripotent stem cells	Biomater Sci 5, 1810–1819 (2017)	https://doi.org/10.1039/C7BM00132K		in-house	1	NaN	NaN	Matrigel	mTeSR-1	85	RPMI-1640	B27	CHIR99021	0-1	IWP2	2022-03-05	7													Yes			Micropatterned PDMS						RPMI-1640, B27	Yes	SEM	Yes				Motion tracking analysis
	Xu, F. et al. MicroRNA-302d promotes the proliferation of human pluripotent stem cell-derived cardiomyocytes by inhibiting LATS2 in the Hippo pathway. Clin Sci 133, 1387–1399 (2019).	2019	MicroRNA-302d promotes the proliferation of human pluripotent stem cell-derived cardiomyocytes by inhibiting LATS2 in the Hippo pathway	Clin Sci 133, 1387–1399 (2019)	https://doi.org/10.1042/CS20190099		Cellapy	1	NaN	NaN	Matrigel	mTeSR-1	85	RPMI-1640	B27	CHIR99021	0-1	IWP2	2022-03-05	7	No glucose															ECM-coated plastic/glass							Yes
	Yang, B. et al. A Net Mold-Based Method of Biomaterial-Free Three-Dimensional Cardiac Tissue Creation. Tissue Eng Part C Methods 25, 243–252 (2019).	2019	A Net Mold-Based Method of Biomaterial-Free Three-Dimensional Cardiac Tissue Creation	Tissue Eng Part C Methods 25, 243–252 (2019)	https://doi.org/10.1089/ten.TEC.2019.0003		in-house	1	NaN	NaN				RPMI-1640	B27	CHIR99021		IWR1													Yes		Yes				Collagen	CM + EC + SC	hCF	HUVEC	70, 15, 15	RPMI-1640, B27	Yes			2.2
	Yang, X. et al. Fatty Acids Enhance the Maturation of Cardiomyocytes Derived from Human Pluripotent Stem Cells. Stem Cell Reports 13, 657–668 (2019).	2019	Fatty Acids Enhance the Maturation of Cardiomyocytes Derived from Human Pluripotent Stem Cells	Stem Cell Reports 13, 657–668 (2019)	https://doi.org/10.1016/j.stemcr.2019.08.013	GSE124057	IMR-90, WTC11	2	Female, Male	NaN, Asian		MEF-conditioned medium, bFGF		RPMI-1640	B27	Activin A, BMP4, CHIR99021	0-3	XAV939	2022-03-05	7			Flow cytometry for cTnT+	80	RPMI-1640, B27, palmitate-BSA, oleate-BSA, linuleate- BSA, L-carnitine		Yes	Oleic acid-albumin and linoleic acid-albumin, Palmitate						Yes		ECM-coated plastic/glass; micropost array							Yes		Yes	1.8	2000		Post deflection
	Yassa, M. E., Mansour, I. A., Sewelam, N. I., Hamza, H. & Gaafar, T. The impact of growth factors on human induced pluripotent stem cells differentiation into cardiomyocytes. Life Sci 196, 38–47 (2018).	2018	The impact of growth factors on human induced pluripotent stem cells differentiation into cardiomyocytes	Life Sci 196, 38–47 (2018)	https://doi.org/10.1016/j.lfs.2018.01.009		UKKi011-A	1	Male	Caucasian	Vitronectin	iPS-Brew XF medium	85	RPMI-1640	B27	Activin A, BMP4	0-3	IWP2	2022-03-05		No glucose with lactate	13-16	Flow cytometry for cTnT+	92												MEA						RPMI-1640, B27	Yes
	Yokota, M., Hatakeyama, H., Ono, Y., Kanazawa, M. & Goto, Y. I. Mitochondrial respiratory dysfunction disturbs neuronal and cardiac lineage commitment of human iPSCs. Cell Death Dis 8, (2017).	2017	Mitochondrial respiratory dysfunction disturbs neuronal and cardiac lineage commitment of human iPSCs	Cell Death Dis 8, (2017)	https://doi.org/10.1038/cddis.2016.484		in-house	1	NaN	NaN	Geltrex	mTeSR-1		RPMI-1640	B27	Activin A, BMP4, bFGF	0-5	DKK-1	2023-06-12							Geltrex										ECM-coated plastic/glass						RPMI-1640, B27	Yes						Motion tracking analysis
	Yoshida, S. et al. Maturation of Human Induced Pluripotent Stem Cell-Derived Cardiomyocytes by Soluble Factors from Human Mesenchymal Stem Cells. Molecular Therapy 26, 2681–2695 (2018).	2018	Maturation of Human Induced Pluripotent Stem Cell-Derived Cardiomyocytes by Soluble Factors from Human Mesenchymal Stem Cells	Molecular Therapy 26, 2681–2695 (2018)	https://doi.org/10.1016/j.stemcr.2021.01.018		253G1	1	NaN	NaN	EBs	ReproCell embryonic stem cell media	EB	DMEM high glucose		Activin A, BMP4, bFGF	0-3	IWP3	2022-03-07				Flow cytometry for cTnT+	78							Yes					ECM-coated plastic/glass						High-glucose DMEM	Yes		Yes		3000		Motion tracking analysis
	Yoshida, S., Sumomozawa, K., Nagamine, K. & Nishizawa, M. Hydrogel Microchambers Integrated with Organic Electrodes for Efficient Electrical Stimulation of Human iPSC‐Derived Cardiomyocytes. Macromol Biosci 19, 1900060 (2019).	2019	Hydrogel Microchambers Integrated with Organic Electrodes for Efficient Electrical Stimulation of Human iPSC?Derived Cardiomyocytes	Macromol Biosci 19, 1900060 (2019)	https://doi.org/10.1002/mabi.201900060		ReproCardio2	1	NaN	NaN				ReproCardio 2 Culture Medium															Yes								Scaffold free	CM			100, 0, 0	ReproCardio 2 Culture Medium	Yes						Motion tracking analysis
	Yu, C. et al. Scanningless and continuous 3D bioprinting of human tissues with decellularized extracellular matrix. Biomaterials 194, 1–13 (2019).	2019	Scanningless and continuous 3D bioprinting of human tissues with decellularized extracellular matrix	Biomaterials 194, 1–13 (2019)	https://doi.org/10.1016/j.biomaterials.2018.12.009		HDF-Cat-106-K-05a-CellApplications , BJ1	2	NaN, Male	NaN, NaN	Matrigel	E8	85	RPMI-1640	B27		0-2		2022-02-04	4, not 12-18	No glucose with lactate	2022-12-18											Yes		Yes		Decellularized tissue	CM			100, 0, 0	RPMI-1640	Yes
	Zaunbrecher, R. J. et al. Cronos titin is expressed in human cardiomyocytes and necessary for normal sarcomere function. Circulation 140, 1647–1660 (2019).	2019	Cronos titin is expressed in human cardiomyocytes and necessary for normal sarcomere function	Circulation 140, 1647–1660 (2019)	https://doi.org/10.1161/CIRCULATIONAHA.119.039521		WTC11	1	Male	Asian	Matrigel	mTeSR-1		RPMI-1640	B27	Activin A, BMP4, CHIR99021	0-3	XAV939	2022-03-05	7, not 18-22	No glucose with lactate	18-22	Flow cytometry for cTnT+	96		Matrigel				yes	Yes					Micropatterned plastic/glass	Fibrin	CM + SC	hMSC		91, 0, 9	RPMI-1640, B27	Yes			1.7	9000		Post deflection
	Zhang, F. et al. Design and fabrication of an integrated heart-on-a-chip platform for construction of cardiac tissue from human iPSC-derived cardiomyocytes and in situ evaluation of physiological function. Biosens Bioelectron 179, (2021).	2021	Design and fabrication of an integrated heart-on-a-chip platform for construction of cardiac tissue from human iPSC-derived cardiomyocytes and in situ evaluation of physiological function	Biosens Bioelectron 179, (2021)	https://doi.org/10.1016/j.bios.2021.113080		Cellapy	1	NaN	NaN	Geltrex	E8	70	Cardiomyocyte Maintenance Medium (Thermo Fisher)			0-2		2023-02-04	4			Visual inspection	80					Yes			Flow					Gelatin	CM			100, 0, 0	Cardiomyocyte Maintenance Medium (Thermo Fisher)	Yes						Motion tracking analysis
	Zhang, J. Z. et al. A Human iPSC Double-Reporter System Enables Purification of Cardiac Lineage Subpopulations with Distinct Function and Drug Response Profiles. Cell Stem Cell 24, 802-811.e5 (2019).	2019	A Human iPSC Double-Reporter System Enables Purification of Cardiac Lineage Subpopulations with Distinct Function and Drug Response Profiles	Cell Stem Cell 24, 802-811.e5 (2019)	https://doi.org/10.1016/j.stem.2019.02.015		SCVI	2	NaN	NaN	Matrigel	E8	85	RPMI-1640	B27	CHIR99021	0-1	IWR1	2022-03-05	7	No glucose	2022-11-14	Flow cytometry for cTnT+			Matrigel										ECM-coated plastic/glass							Yes						Motion tracking analysis
	Zhang, K. et al. Plakophilin-2 truncating variants impair cardiac contractility by disrupting sarcomere stability and organization. Sci. Adv 7, (2021).	2021	Plakophilin-2 truncating variants impair cardiac contractility by disrupting sarcomere stability and organization	Sci. Adv 7, (2021)	https://doi.org/10.1126/sciadv.abh3995		PGP1, WTC11	2	Male, Male	Caucasian, Asian	Matrigel	mTeSR-1		RPMI-1640	B27	CHIR99021	0-1	IWP4	2022-03-05	13	No glucose with lactate	2022-09-13				Fibronectin				Yes	Yes		Yes	Yes		ECM-coated plastic/glass	Fibrin + matrigel	CM + SC	hMSC		90, 0, 10	High-glucose DMEM, FBS, NEAAs, GlutaMax	Yes		Yes				TFM; Post deflection
	Zhang, L. et al. Derivation and high engraftment of patient-specific cardiomyocyte sheet using induced pluripotent stem cells generated from adult cardiac fibroblast. Circ Heart Fail 8, 156–166 (2015).	2015	Derivation and high engraftment of patient-specific cardiomyocyte sheet using induced pluripotent stem cells generated from adult cardiac fibroblast	Circ Heart Fail 8, 156–166 (2015)	https://doi.org/10.1161/CIRCHEARTFAILURE.114.001317		in-house	3	NaN	NaN	Matrigel	mTeSR-1		RPMI-1640	B27	Activin A	0-1	BMP4, bFGF	2022-01-05	5			Flow cytometry for cTnT+	90												ECM-coated plastic/glass							Yes
	Zhang, M. et al. Universal cardiac induction of human pluripotent stem cells in two and three-dimensional formats: Implications for in vitro maturation. Stem Cells 33, 1456–1469 (2015).	2015	Universal cardiac induction of human pluripotent stem cells in two and three-dimensional formats: Implications for in vitro maturation	Stem Cells 33, 1456–1469 (2015)	https://doi.org/10.1002/stem.1964		in-house	3	NaN	NaN	Matrigel	FTDA	100	APEL medium		CHIR99021, BMP4	0-1	IWP2	2022-02-03							Matrigel, Gelatin										ECM-coated plastic/glass	Scaffold free	CM			100, 0, 0	APEL medium	Yes	TEM
	Zhang, Y. S. et al. Bioprinting 3D microfibrous scaffolds for engineering endothelialized myocardium and heart-on-a-chip. Biomaterials 110, 45–59 (2016).	2016	Bioprinting 3D microfibrous scaffolds for engineering endothelialized myocardium and heart-on-a-chip	Biomaterials 110, 45–59 (2016)	https://doi.org/10.1016/j.biomaterials.2016.09.003		Stem Cell Theranostics CMs	1	NaN	NaN				RPMI-1640	B27																Yes	Flow	Yes				gelMA+alginate, 3D printing	CM + EC		HUVEC	9, 91, 0	RPMI-1640, B27	Yes		Yes				Motion tracking analysis
	Zhao, Y. et al. A Platform for Generation of Chamber-Specific Cardiac Tissues and Disease Modeling. Cell 176, 913-927.e18 (2019).	2019	A Platform for Generation of Chamber-Specific Cardiac Tissues and Disease Modeling	Cell 176, 913-927.e18 (2019)	https://doi.org/10.1016/j.cell.2018.11.042	GSE122661	BJ1, C2A, iCell, iCell2, CDI(3)	7	Male, NaN, NaN, NaN, Female	NaN, NaN, NaN, NaN, Caucasian	Matrigel	mTeSR-1	100; EB	RPMI-1640	B27	Activin A, BMP4; CHIR99021	0-1	IWP2 or IWP4	2022-03-05	7			Flow cytometry for cTnT+	75		Matrigel			Yes	Yes	Yes						Collagen + matrigel	CM + SC	hCF		91, 0, 9		Yes	TEM					Post deflection
	Zhao, Y. et al. Engineering microenvironment for human cardiac tissue assembly in heart-on-a-chip platform. Matrix Biology 85–86, 189–204 (2020).	2020	Engineering microenvironment for human cardiac tissue assembly in heart-on-a-chip platform	Matrix Biology 85–86, 189–204 (2020)	https://doi.org/10.1016/j.matbio.2019.04.001		BJ1	1	Male	NaN	Matrigel	mTeSR-1	85	RPMI-1640	B27	CHIR99021	0-1	IWP2	2022-03-05	7			Flow cytometry for cTnT+	75		Matrigel			Yes	Yes	Yes						Collagen + fibrin + matrigel	CM + SC	hCF		91, 0, 9		Yes		Yes				Post deflection
	Ziegler, N. et al. AMPKb1 and AMPKb2 define an isoform-specific gene signature in human pluripotent stem cells, differentially mediating cardiac lineage specification. Journal of Biological Chemistry 295, 17659–17671 (2020).	2020	AMPKb1 and AMPKb2 define an isoform-specific gene signature in human pluripotent stem cells, differentially mediating cardiac lineage specification	Journal of Biological Chemistry 295, 17659–17671 (2020)	https://doi.org/10.1074/jbc.RA120.013990		ASE-9202	1	NaN	NaN	Matrigel	mTeSR Plus		STEMdiff Cardiomyocyte Support Medium		StemCell Differentiation kit	0-4		2022-06-08	8	No glucose with lactate	2022-10-12	Western blot for cTnT	30		Matrigel										ECM-coated plastic/glass							Yes
	Zuppinger, C. et al. Characterization of cytoskeleton features and maturation status of cultured human iPSC-derived cardiomyocytes. European Journal of Histochemistry 61, 145–153 (2017).	2017	Characterization of cytoskeleton features and maturation status of cultured human iPSC-derived cardiomyocytes	European Journal of Histochemistry 61, 145–153 (2017)	https://doi.org/10.4081/ejh.2017.2763		ax2505	1	NaN	NaN				Axol Biosciences Cardiomyocyte Maintenance Media	FBS											Gelatin										ECM-coated plastic/glass							Yes			1.7
	Drawnel, F. M. et al. Disease modeling and phenotypic drug screening for diabetic cardiomyopathy using human induced pluripotent stem cells. Cell Rep 9, (2014).	2014	Disease modeling and phenotypic drug screening for diabetic cardiomyopathy using human induced pluripotent stem cells	Cell Rep 9, (2014)	https://doi.org/10.1016/j.celrep.2014.09.055		CDI-MRB	1	NaN	NaN				DMEM no glucose	HEPES								Flow cytometry for cTnT+	90			Yes	L-carnitine, creatine, taurine, nonessential amino acids, insulin-transferrin-selenium, linoleic-oleic acid								Fibronectin-coated plastic/glass							Yes	TEM	Yes	1.015	700		Impedance monitoring
	Bedada, F. B. et al. Acquisition of a quantitative, stoichiometrically conserved ratiometric marker of maturation status in stem cell-derived cardiac myocytes. Stem Cell Reports 3, (2014).	2014	Acquisition of a quantitative, stoichiometrically conserved ratiometric marker of maturation status in stem cell-derived cardiac myocytes	Stem Cell Reports 3, (2014)	https://doi.org/10.1016/j.stemcr.2014.07.012		DF 19-9-11, IPLZ3.13, IBO5.57, hc, 13FLVN0C1	5	Male, NaN, NaN, NaN, NaN	NaN, NaN, NaN, NaN, NaN	Matrigel	mTeSR1, TeSR-E8		RPMI-1640	B27	Activin A, BMP4, bFGF, CHIR-99021	0-2, 0-3	IWP4, IWR2	3-5, 3-7	5, 7							Yes	T3								Matrigel-coated plastic, poly-D-lysine or poly-Dlysine plus cardiac-matrix coated glass							Yes		Yes				Gene expression
	Lian, X. et al. Robust cardiomyocyte differentiation from human pluripotent stem cells via temporal modulation of canonical Wnt signaling. Proceedings of the National Academy of Sciences 109, (2012).	2012	Robust cardiomyocyte differentiation from human pluripotent stem cells via temporal modulation of canonical Wnt signaling	Proceedings of the National Academy of Sciences 109, (2012)	https://doi.org/10.1073/pnas.1200250109		IMR90C4	1	Female	NaN	Matrigel, Synthemax plates	mTeSR1		RPMI-1640	FBS, B27	Activin A, BMP4	day -3 to 0	IWP4, IWR2	3-5	1			Flow cytometry for cTnT+	87, 82												Matrigel-coated or Synthemax-coated plastic							Yes	TEM	Yes
	Dai, D.F. et al. Mitochondrial maturation in human pluripotent stem cell derived cardiomyocytes. Stem Cells International (2017).	2017	Mitochondrial maturation in human pluripotent stem cell derived cardiomyocytes	Stem Cells International, (2017)	https://doi.org/10.1155/2017/5153625		IMR90	1	Female	NaN	Matrigel	mTeSR		RPMI-1640	B27, L-glutamine	Activin A, BMP4								90		PEI-gelatin	Yes	L-glutamine								Matrigel-coated plastic, PEI-gelatin coated plastic							Yes	TEM	Yes		2400
	Lopez, C.A. et al. Physiological and pharmacological stimulation for in vitro maturation of substrate metabolism in human induced pluripotent stem cell-derived cardiomyocytes. Scientific Reports 11, (2021).	2021	Physiological and pharmacological stimulation for in vitro maturation of substrate metabolism in human induced pluripotent stem cell-derived cardiomyocytes	Scientific Reports 11, (2021)	https://doi.org/10.1038/s41598-021-87186-y		OX1-19	1	Male	NaN	Matrigel	mTeSR1		RPMI-1640	B27	Activin A, CHIR-99021		IWP4, Wnt-C59		7																Matrigel-coated plastic	Collagen, Collagen+C4S, Collagen+elastin						Yes	SEM
	Sarikhani, M. et al. Sustained activation of AMPK enhances differentiation of human iPSC-derived cardiomyocytes via sirtuin activation. Stem Cell Reports 15, (2020).	2020	Sustained activation of AMPK enhances differentiation of human iPSC-derived cardiomyocytes via sirtuin activation	Stem Cell Reports 15, (2020)	https://doi.org/10.1016/j.stemcr.2020.06.012	GSE152265	BJ RiPS-A, UCSD142i-86-1	2	NaN, NaN	NaN, NaN		StemFlex	70	RPMI-1640	B27	CHIR99021		IWP4		7			Flow cytometry for TNNT2+	70
	Hidalgo, A. et al. Modelling ischemia-reperfusion injury (IRI) in vitro using metabolically matured induced pluripotent stem cell-derived cardiomyocytes. APL bioengineering 2, (2018).	2018	Modelling ischemia-reperfusion injury (IRI) in vitro using metabolically matured induced pluripotent stem cell-derived cardiomyocytes	APL bioengineering 2, (2018)	https://doi.org/10.1063/1.5000746		C32	1	NaN	NaN	Matrigel	mTeSR	100	RPMI-1640	B27	CHIR99021		IWP4		3					DMEM no glucose+FCS		Yes	Galactose, palmitic acid, oleic acid								Matrigel-coated plastic
	Yang, X. et al. Tri-iodo-l-thyronine promotes the maturation of human cardiomyocytes-derived from induced pluripotent stem cells. Journal of Molecular and Cellular Cardiology 72, (2014).	2014	Tri-iodo-l-thyronine promotes the maturation of human cardiomyocytes-derived from induced pluripotent stem cells	Journal of Molecular and Cellular Cardiology 72, (2014)	https://doi.org/10.1016/j.yjmcc.2014.04.005		IMR90	1	Female	NaN		Mouse embryonic fibroblast-conditioned medium		RPMI-1640	B27	Activin A, BMP4, CHIR 99021		XAV939					Flow cytometry for cTnT+	80			Yes	T3																		1.73	1000
	Funakoshi, S. et al. Generation of mature compact ventricular cardiomyocytes from human pluripotent stem cells. Nature Communications 12, (2021).	2021	Generation of mature compact ventricular cardiomyocytes from human pluripotent stem cells	Nature Communications 12, (2021)	https://doi.org/10.1038/s41467-021-23329-z	GSE152589	HES2, ESI-17	2	NaN, NaN	NaN, NaN		StemPro-34 media		DMEM high glucose	IGF2, human insulin	Activin A, BMP4, bFGF		IWP2		10					DMEM low glucose	Polyheme	Yes	Palmitic acid, Dexamethazone, T3 hormone, GW7647, Palmitate																TEM	Yes	2.1
	Bekhite, M. et al. The role of ceramide accumulation in human induced pluripotent stem cell-derived cardiomyocytes on mitochondrial oxidative stress and mitophagy. Free Radical Biology and Medicine 167, (2021).	2021	The role of ceramide accumulation in human induced pluripotent stem cell-derived cardiomyocytes on mitochondrial oxidative stress and mitophagy	Free Radical Biology and Medicine 167, (2021)	https://doi.org/10.1016/j.freeradbiomed.2021.02.016		wt2, wt1	2	Female, Male	NaN, NaN	Matrigel	Essential 8 medium		RPMI-1640	B27
	Granéli, C. et al. Diabetic cardiomyopathy modelling using induced pluripotent stem cell derived cardiomyocytes: recent advances and emerging models. Stem Cell Reviews and Reports 15, (2019).	2019	Diabetic cardiomyopathy modelling using induced pluripotent stem cell derived cardiomyocytes: recent advances and emerging models	Stem Cell Reviews and Reports 15, (2019)	https://doi.org/10.1007/s12015-018-9858-1		CDI-MRB	1	NaN	NaN				DMEM no glucose	HEPES, glucose										DMEM no glucose		Yes	L-carnitine, creatine, taurine, nonessential amino acids, insulin-transferrin-selenium, 2*linoleic-oleic acid
	Birket, M. J. et al. A Human Stem Cell Model of Fabry Disease Implicates LIMP-2 Accumulation in Cardiomyocyte Pathology. Stem Cell Reports 13, 380–393 (2019).	2019	A Human Stem Cell Model of Fabry Disease Implicates LIMP-2 Accumulation in Cardiomyocyte Pathology	Stem Cell Reports 13, 380–393 (2019)	https://doi.org/10.1016/j.stemcr.2019.07.004		in-house (4)	4	NaN	NaN	Matrigel	mTeSR		DMEM/F12	Bovine Serum Albumin, Creatine, Taurine, L-carnitine, α-MTG, AA-2P, 1x Trace Elements A, B and C, 1x Chemically Defined Lipids, 1x Glutamax, 0.5x pen/strep and Thiazovivin, plus the addition of 1% FCS	CHIR99021, BMP4	0-2	Wnt-C59, bFGF	2-4	2	Cell sorting		Flow cytometry for SIRPA+	96	DMEM/F12	Matrigel	Yes	T3, dexamethasone, palmitic acid								ECM-coated plastic/glass							Yes				1800
	Gentillon, C. et al. Targeting HIF-1α in combination with PPARα activation and postnatal factors promotes the metabolic maturation of human induced pluripotent stem cell-derived cardiomyocytes. Journal of molecular and cellular cardiology 132, 120-135 (2019).	2019	Targeting HIF-1α in combination with PPARα activation and postnatal factors promotes the metabolic maturation of human induced pluripotent stem cell-derived cardiomyocytes	Journal of molecular and cellular cardiology 132, 120-135 (2019)	https://doi.org/10.1016/j.yjmcc.2019.05.003		IMR-90	1	Female	NaN	Matrigel	mTeSR	80	RPMI-1640	B27	Recombinant human activin A	0-1	Recombinant human bone morphogenic protein-4	2022-01-04	4					DMEM		Yes	Oleic acid, FM19G11 (FM), WY-14643 (WY), triiodo-L-thyronine (T3), insulin-like growth factor-I (IGF-1), dexamethasone															Yes
	Poon, E. et al. Proteomic analysis of human pluripotent stem Cell–Derived, fetal, and adult ventricular cardiomyocytes reveals pathways crucial for cardiac metabolism and maturation. Circulation 8(3), 427-436 (2015).	2015	Proteomic analysis of human pluripotent stem Cell–Derived, fetal, and adult ventricular cardiomyocytes reveals pathways crucial for cardiac metabolism and maturation	Circulation 8(3), 427-436 (2015)	https://doi.org/10.1161/CIRCGENETICS.114.000918		hES2	1	NaN	NaN	Matrigel	mTeSR		DMEM	nonessential amino acids, glutamine, penicillin, streptomycin	Bone morphogenetic protein 4	0-1	Bone morphogenetic protein 4	2022-01-04						DMEM/F12		Yes	T3															Yes						Contractile Force in HumanVentricular Cardiac Microtissues
[truncated: 21 more columns]
