# Supplementary material for: A community-oriented, data-driven resource to improve protocol design for cardiac modelling from human pluripotent stem cells
Source: Research Square preprint supplement (doi:10.21203/rs.3.rs-5017297/v1), 2024-09-27
Supplement: Supplementary file 3 [file c4280bac130a92a60fd96556.xlsx]

## Sheet: 2_JaccardIndex_Pairwise
	hiPSC Line - Specialised (121)	hiPSC Line - iCell (46)	hiPSC Line - WTC11 (30)	hiPSC Line - IMR90 (19)	hiPSC Line - Cor.4U (16)	hiPSC Line - DF19-9-11T.H (16)	hiPSC Line - PGP1 (11)	hiPSC Line - 253G1 (10)	hiPSC Line - Gibco episomal (10)	hiPSC Line - 201B7 (9)	hiPSC Line - iCell2 (8)	hiPSC Line - SCVI-273 (8)	hiPSC Line - BJ1 (7)	hiPSC Line - C25 (6)	hiPSC Line - ATCC (5)	hiPSC Line - Cellapy (4)	hiPSC Line - BJ RiPS (4)	hiPSC Line - Reported (310)	hiPSC Line - 201B6 (3)	Number of hiPSC Lines - 1 (218)	Number of hiPSC Lines - 2 (50)	Number of hiPSC Lines - 3 (27)	Number of hiPSC Lines - 4 (10)	Number of hiPSC Lines - >5 (8)	Number of hiPSC Lines - Reported (313)	Sex of hiPSC Lines - Known (116)	Sex of hiPSC Lines - Male (64)	Sex of hiPSC Lines - Female (42)	Sex of hiPSC Lines - Both (10)	Ancestry of hiPSC Lines - Known (71)	Ancestry of hiPSC Lines - Caucasian (42)	Ancestry of hiPSC Lines - Asian (30)	Ancestry of hiPSC Lines - African (1)	hiPSC Backbone Media - mTeSR (102)	hiPSC Backbone Media - Reported (228)	hiPSC Backbone Media - Essential 8 (82)	hiPSC Backbone Media - Embryonic Stem Cell (20)	hiPSC Backbone Media - Specialised (17)	hiPSC Backbone Media - Conditioned (12)	hiPSC Backbone Media - DMEM (10)	hiPSC Backbone Media - StemFit (5)	hiPSC Backbone Media - StemFlex (5)	hiPSC Backbone Media - Differentiation (1)	hiPSC-CM Backbone Media - RPMI-1640 (161)	hiPSC-CM Backbone Media - iCell Maintenance Medium (86)	hiPSC-CM Backbone Media - DMEM (18)	hiPSC-CM Backbone Media - StemPro-34 (14)	hiPSC-CM Backbone Media - Reported (301)	hiPSC-CM Backbone Media - Commercial Cardiomyocyte Kit (12)
hiPSC Line - Specialised (121)	0	0	0	0	0	0	0	0	0	0	0	0	0	0	0	0	0	0.3903225806451613	0	0.31906614785992216	0.11764705882352941	0.1044776119402985	0.0396825	0.015748031496062992	0.3865814696485623	0.087156	0.0571429	0.0448718	0.015503875968992248	0.054945054945054944	0.0584416	0	0.00826446	0.26704545454545453	0.41295546558704455	0.2155688622754491	0.0522388	0.078125	0.015267175572519083	0.0396825	0.016129032258064516	0	0.00826446	0.323944	0.11290322580645161	0.061068702290076333	0.0714286	0.3881578947368421	0.064
hiPSC Line - iCell (46)	0	0	0	0.015625	0.0508475	0	0	0	0	0	0	0	0	0	0	0	0	0.14838709677419354	0	0.15789473684210525	0.0666667	0.028169014084507043	0	0.038461538461538464	0.14696485623003194	0.0125	0	0.023255813953488372	0	0.00862069	0.011494252873563218	0	0	0	0.0110701	0.015873015873015872	0	0.016129032258064516	0	0	0	0	0	0.019704433497536946	0.3894736842105263	0	0	0.1377049180327869	0
hiPSC Line - WTC11 (30)	0	0	0	0.0425532	0	0.045454545454545456	0.025	0	0.025641	0	0	0.027027	0	0	0	0	0	0.0967742	0	0.0782609	0.0666667	0.0555556	0.0810811	0.027027	0.0958466	0.25862068965517243	0.40298507462686567	0	0.0810811	0.4225352112676056	0.0285714	1	0	0.0909091	0.13157894736842105	0.17894736842105263	0.0204082	0	0.024390243902439025	0	0	0.029411764705882353	0	0.13690476190476192	0.0545455	0	0	0.0996678	0
hiPSC Line - IMR90 (19)	0	0.015625	0.0425532	0	0	0.0606061	0	0	0	0	0	0.08	0	0	0	0	0	0.0612903	0	0.048672566371681415	0.0952381	0	0.0740741	0	0.0607029	0.16379310344827586	0	0.32608695652173914	0.16	0.022727272727272728	0	0.0425532	0	0.1	0.0786026	0.052083333333333336	0.0263158	0	0.10714285714285714	0.11538461538461539	0	0	0	0.097561	0.019417475728155338	0	0	0.0631229	0
hiPSC Line - Cor.4U (16)	0	0.0508475	0	0	0	0	0.038461538461538464	0	0	0	0.043478260869565216	0	0	0	0	0	0	0.0516129	0	0.044642857142857144	0.047619047619047616	0.0487805	0	0.043478260869565216	0.051118210862619806	0.00763359	0.012658227848101266	0	0	0.011627906976744186	0.017543859649122806	0	0	0.017241379310344827	0.012448132780082987	0	0	0.03125	0	0	0	0	0	0.017241379310344827	0.0625	0.030303030303030304	0	0.0462046	0
hiPSC Line - DF19-9-11T.H (16)	0	0	0.045454545454545456	0.0606061	0	0	0	0	0	0	0	0	0	0	0	0	0	0.0516129	0	0.04	0.03125	0.0487805	0.04	0.0909091	0.051118210862619806	0.13793103448275862	0.19402985074626866	0	0.13043478260869565	0.0357143	0.017543859649122806	0.045454545454545456	0	0.102804	0.0655022	0.031578947368421054	0.125	0	0	0	0	0.16666666666666666	0	0.0858896	0	0.0625	0	0.053156146179401995	0
hiPSC Line - PGP1 (11)	0	0	0.025	0	0.038461538461538464	0	0	0	0	0	0	0	0	0	0	0	0	0.035483870967741936	0	0.0361991	0.0338983	0	0	0.0555556	0.0351438	0.0948276	0.171875	0	0	0.15492957746478872	0.2619047619047619	0.025	0	0.10784313725490197	0.0482456	0	0	0	0	0	0	0	0	0.0361446	0.0543478	0	0	0.036544850498338874	0
hiPSC Line - 253G1 (10)	0	0	0	0	0	0	0	0	0	0.11764705882352941	0	0	0	0	0	0	0	0.0322581	0	0.027027	0.0526316	0.027777777777777776	0	0	0.0319489	0.016129032258064516	0	0.04	0	0.0253165	0.04	0	0	0.0181818	0.039301310043668124	0.010989	0.1111111111111111	0	0.1	0.0526316	0.0714286	0	0	0.011834319526627219	0.010526315789473684	0.12	0.14285714285714285	0.0332226	0
hiPSC Line - Gibco episomal (10)	0	0	0.025641	0	0	0	0	0	0	0	0	0	0	0	0	0	0.0769231	0.0322581	0	0.027027	0.0169492	0.0882353	0	0	0.0319489	0.008	0.0136986	0	0	0.0125	0	0.025641	0	0.00900901	0.034782608695652174	0.0697674	0.034482758620689655	0	0	0	0	0.0714286	0	0.049079754601226995	0.010526315789473684	0.037037037037037035	0	0.0332226	0
hiPSC Line - 201B7 (9)	0	0	0	0	0	0	0	0.11764705882352941	0	0	0	0	0	0	0	0	0	0.0290323	0	0.031818181818181815	0.0350877	0	0	0	0.028754	0.0775862	0	0.21428571428571427	0	0.1267605633802817	0.21428571428571427	0	0	0.0183486	0.025974025974025976	0	0.16	0	0	0	0.16666666666666666	0	0	0	0.010638297872340425	0.125	0.0952381	0.026490066225165563	0.05
hiPSC Line - iCell2 (8)	0	0	0	0	0.043478260869565216	0	0	0	0	0	0	0	0.0714286	0.0769231	0	0	0	0.025806451612903226	0	0.018018018018018018	0.017543859649122806	0.0606061	0	0.0666667	0.025559105431309903	0.0163934	0	0.0204082	0.058823529411764705	0.025974025974025976	0.041666666666666664	0	0	0.00917431	0.00854701	0	0	0.041666666666666664	0	0	0	0	0	0.011976047904191617	0.056179775280898875	0	0	0.026578073089700997	0.0526316
hiPSC Line - SCVI-273 (8)	0	0	0.027027	0.08	0	0	0	0	0	0	0	0	0	0	0	0	0	0.025806451612903226	0	0	0.0943396	0.029411764705882353	0.125	0	0.025559105431309903	0.0420168	0.014084507042253521	0.0869565	0	0.0128205	0	0.027027	0	0.00917431	0.0350877	0.0714286	0	0	0	0.058823529411764705	0	0	0	0.0368098	0.021739130434782608	0	0	0.026578073089700997	0
hiPSC Line - BJ1 (7)	0	0	0	0	0	0	0	0	0	0	0.0714286	0	0	0	0.0909091	0	0	0.0225806	0	0.00896861	0.0754717	0	0	0.0714286	0.022364217252396165	0.0603448	0.0923077	0	0.0625	0.012987012987012988	0.020833333333333332	0	0	0.0380952	0.026200873362445413	0.047058823529411764	0	0	0.0555556	0.0625	0	0	0	0.024390243902439025	0.010869565217391304	0	0	0.019867549668874173	0.0555556
hiPSC Line - C25 (6)	0	0	0	0	0	0	0	0	0	0	0.0769231	0	0	0	0	0	0	0.0193548	0	0.013574660633484163	0.0181818	0.0645161	0	0	0.019169329073482427	0.0517241	0	0.11627906976744186	0.0666667	0.084507	0.14285714285714285	0	0	0	0.0263158	0	0	0.2777777777777778	0.058823529411764705	0	0	0	0	0.024539877300613498	0.010989	0	0	0.016556291390728478	0
hiPSC Line - ATCC (5)	0	0	0	0	0	0	0	0	0	0	0	0	0.0909091	0	0	0	0	0.016129032258064516	0	0.0182648	0.018518518518518517	0	0	0	0.0159744	0.00833333	0.014705882352941176	0	0	0	0	0	0	0.038834951456310676	0.021929824561403508	0.023529411764705882	0	0	0	0	0	0	0	0.031055900621118012	0	0	0	0.016611295681063124	0
hiPSC Line - Cellapy (4)	0	0	0	0	0	0	0	0	0	0	0	0	0	0	0	0	0	0.012903225806451613	0	0.0183486	0	0	0	0	0.012779552715654952	0	0	0	0	0	0	0	0	0.00952381	0.017543859649122806	0.023809523809523808	0	0.05	0	0	0	0	0	0.018518518518518517	0	0	0	0.013289036544850499	0.0666667
hiPSC Line - BJ RiPS (4)	0	0	0	0	0	0	0	0	0.0769231	0	0	0	0	0	0	0	0	0.012903225806451613	0	0.00909091	0.018867924528301886	0.0333333	0	0	0.012779552715654952	0	0	0	0	0	0	0	0	0.00952381	0.017543859649122806	0.011764705882352941	0.0909091	0	0	0	0	0.2857142857142857	0	0.024844720496894408	0	0	0	0.013289036544850499	0
hiPSC Line - Reported (310)	0.3903225806451613	0.14838709677419354	0.0967742	0.0612903	0.0516129	0.0516129	0.035483870967741936	0.0322581	0.0322581	0.0290323	0.025806451612903226	0.025806451612903226	0.0225806	0.0193548	0.016129032258064516	0.012903225806451613	0.012903225806451613	0	0.00967742	0.6869009584664537	0.16129032258064516	0.0870968	0.0322581	0.025806451612903226	0.9904153354632588	0.3741935483870968	0.2064516129032258	0.13548387096774195	0.0322581	0.22903225806451613	0.13548387096774195	0.0967742	0.00322581	0.32051282051282054	0.7188498402555911	0.2604501607717042	0.0645161	0.054838709677419356	0.0387097	0.0322581	0.016129032258064516	0.016129032258064516	0.00322581	0.5144694533762058	0.2733118971061093	0.0580645	0.0418006	0.952077	0.0387097
hiPSC Line - 201B6 (3)	0	0	0	0	0	0	0	0	0	0	0	0	0	0	0	0	0	0.00967742	0	0.013761467889908258	0	0	0	0	0.00958466	0.0258621	0	0.0714286	0	0.0422535	0.0714286	0	0	0	0.013157894736842105	0	0	0	0.25	0	0	0	0	0.012345679012345678	0.011363636363636364	0	0	0.00996678	0
Number of hiPSC Lines - 1 (218)	0.31906614785992216	0.15789473684210525	0.0782609	0.048672566371681415	0.044642857142857144	0.04	0.0361991	0.027027	0.027027	0.031818181818181815	0.018018018018018018	0	0.00896861	0.013574660633484163	0.0182648	0.0183486	0.00909091	0.6869009584664537	0.013761467889908258	0	0	0	0	0	0.6964856230031949	0.2748091603053435	0.19491525423728814	0.1111111111111111	0	0.18442622950819673	0.1111111111111111	0.0782609	0.00458716	0.2648221343873518	0.48172757475083056	0.2	0.0625	0.049107142857142856	0.036036036036036036	0.017857142857142856	0.0182648	0.00904977	0	0.39338235294117646	0.26141078838174275	0.0630631	0.0403587	0.6741935483870968	0.040724
Number of hiPSC Lines - 2 (50)	0.11764705882352941	0.0666667	0.0666667	0.0952381	0.047619047619047616	0.03125	0.0338983	0.0526316	0.0169492	0.0350877	0.017543859649122806	0.0943396	0.0754717	0.0181818	0.018518518518518517	0	0.018867924528301886	0.16129032258064516	0	0	0	0	0	0	0.1597444089456869	0.18571428571428572	0.0961538	0.15	0.0714286	0.11009174311926606	0.0952381	0.0666667	0	0.13432835820895522	0.16806722689075632	0.1092436974789916	0.029411764705882353	0.015151515151515152	0.0508475	0.1111111111111111	0.018518518518518517	0.018518518518518517	0.02	0.14673913043478262	0.10569105691056911	0.046153846153846156	0.0322581	0.15460526315789475	0.0163934
Number of hiPSC Lines - 3 (27)	0.1044776119402985	0.028169014084507043	0.0555556	0	0.0487805	0.0487805	0	0.027777777777777776	0.0882353	0	0.0606061	0.029411764705882353	0	0.0645161	0	0	0.0333333	0.0870968	0	0	0	0	0	0	0.086262	0.0592593	0.045977	0.045454545454545456	0.027777777777777776	0.0652174	0.045454545454545456	0.0555556	0	0.0661157	0.10869565217391304	0.09	0.044444444444444446	0.1282051282051282	0.0263158	0	0	0.0322581	0	0.10588235294117647	0.0366972	0	0.025	0.0860927	0.0540541
Number of hiPSC Lines - 4 (10)	0.0396825	0	0.0810811	0.0740741	0	0.04	0	0	0	0	0	0.125	0	0	0	0	0	0.0322581	0	0	0	0	0	0	0.0319489	0.0413223	0.0136986	0	0.25	0.0519481	0.04	0.0810811	0	0.046729	0.043859649122807015	0.0697674	0.034482758620689655	0	0	0	0	0	0	0.030120481927710843	0.0212766	0.037037037037037035	0.043478260869565216	0.0332226	0
Number of hiPSC Lines - >5 (8)	0.015748031496062992	0.038461538461538464	0.027027	0	0.043478260869565216	0.0909091	0.0555556	0	0	0	0.0666667	0	0.0714286	0	0	0	0	0.025806451612903226	0	0	0	0	0	0	0.025559105431309903	0.0420168	0.043478260869565216	0.0204082	0.058823529411764705	0.0533333	0.0638298	0.027027	0	0.028037383177570093	0.0305677	0.046511627906976744	0.037037037037037035	0	0	0	0	0.0833333	0	0.024242424242424242	0.032967	0	0.047619047619047616	0.026578073089700997	0
Number of hiPSC Lines - Reported (313)	0.3865814696485623	0.14696485623003194	0.0958466	0.0607029	0.051118210862619806	0.051118210862619806	0.0351438	0.0319489	0.0319489	0.028754	0.025559105431309903	0.025559105431309903	0.022364217252396165	0.019169329073482427	0.0159744	0.012779552715654952	0.012779552715654952	0.9904153354632588	0.00958466	0.6964856230031949	0.1597444089456869	0.086262	0.0319489	0.025559105431309903	0	0.3706070287539936	0.20447284345047922	0.134185	0.0319489	0.2268370607028754	0.134185	0.0958466	0.00319489	0.321656	0.7229299363057324	0.26198083067092653	0.0638978	0.054313099041533544	0.038338658146964855	0.0319489	0.0159744	0.0159744	0.00319489	0.5143769968051118	0.27070063694267515	0.057508	0.0447284	0.9554140127388535	0.038338658146964855
Sex of hiPSC Lines - Known (116)	0.087156	0.0125	0.25862068965517243	0.16379310344827586	0.00763359	0.13793103448275862	0.0948276	0.016129032258064516	0.008	0.0775862	0.0163934	0.0420168	0.0603448	0.0517241	0.00833333	0	0	0.3741935483870968	0.0258621	0.2748091603053435	0.18571428571428572	0.0592593	0.0413223	0.0420168	0.3706070287539936	0	0.5517241379310345	0.3620689655172414	0.0862069	0.6120689655172413	0.3620689655172414	0.25862068965517243	0.00862069	0.3374233128834356	0.46382978723404256	0.2147239263803681	0.0708661	0.0555556	0.0666667	0.0413223	0.0168067	0.025423728813559324	0	0.35784313725490197	0.12849162011173185	0.0551181	0.023622047244094488	0.3717105263157895	0.024
Sex of hiPSC Lines - Male (64)	0.0571429	0	0.40298507462686567	0	0.012658227848101266	0.19402985074626866	0.171875	0	0.0136986	0	0	0.014084507042253521	0.0923077	0	0.014705882352941176	0	0	0.2064516129032258	0	0.19491525423728814	0.0961538	0.045977	0.0136986	0.043478260869565216	0.20447284345047922	0.5517241379310345	0	0	0	0.43617021276595747	0.15217391304347827	0.40298507462686567	0.015625	0.296875	0.26956521739130435	0.18699186991869918	0.037037037037037035	0.0125	0.013333333333333334	0.0136986	0	0.045454545454545456	0	0.25	0.10294117647058823	0.0379747	0	0.20860927152317882	0.013333333333333334
Sex of hiPSC Lines - Female (42)	0.0448718	0.023255813953488372	0	0.32608695652173914	0	0	0	0.04	0	0.21428571428571427	0.0204082	0.0869565	0	0.11627906976744186	0	0	0	0.13548387096774195	0.0714286	0.1111111111111111	0.15	0.045454545454545456	0	0.0204082	0.134185	0.3620689655172414	0	0	0	0.25555555555555554	0.3770491803278688	0	0	0.0909091	0.15879828326180256	0.0689655	0.0877193	0.0925926	0.125	0.0833333	0.044444444444444446	0	0	0.12154696132596685	0.0578512	0.0714286	0.0566038	0.132013	0.038461538461538464
Sex of hiPSC Lines - Both (10)	0.015503875968992248	0	0.0810811	0.16	0	0.13043478260869565	0	0	0	0	0.058823529411764705	0	0.0625	0.0666667	0	0	0	0.0322581	0	0	0.0714286	0.027777777777777776	0.25	0.058823529411764705	0.0319489	0.0862069	0	0	0	0.0945946	0.10638297872340426	0.0810811	0	0.046729	0.043859649122807015	0.045454545454545456	0.034482758620689655	0.038461538461538464	0.047619047619047616	0	0	0	0	0.0363636	0.0212766	0	0	0.0332226	0
Ancestry of hiPSC Lines - Known (71)	0.054945054945054944	0.00862069	0.4225352112676056	0.022727272727272728	0.011627906976744186	0.0357143	0.15492957746478872	0.0253165	0.0125	0.1267605633802817	0.025974025974025976	0.0128205	0.012987012987012988	0.084507	0	0	0	0.22903225806451613	0.0422535	0.18442622950819673	0.11009174311926606	0.0652174	0.0519481	0.0533333	0.2268370607028754	0.6120689655172413	0.43617021276595747	0.25555555555555554	0.0945946	0	0.5915492957746479	0.4225352112676056	0.014084507042253521	0.2013888888888889	0.28879310344827586	0.1417910447761194	0.0705882	0.0864198	0.0641026	0.0125	0.027027	0.013333333333333334	0	0.20833333333333334	0.12142857142857143	0.047058823529411764	0.036585365853658534	0.22772277227722773	0.024691358024691357
Ancestry of hiPSC Lines - Caucasian (42)	0.0584416	0.011494252873563218	0.0285714	0	0.017543859649122806	0.017543859649122806	0.2619047619047619	0.04	0	0.21428571428571427	0.041666666666666664	0	0.020833333333333332	0.14285714285714285	0	0	0	0.13548387096774195	0.0714286	0.1111111111111111	0.0952381	0.045454545454545456	0.04	0.0638298	0.134185	0.3620689655172414	0.15217391304347827	0.3770491803278688	0.10638297872340426	0.5915492957746479	0	0.0285714	0	0.14285714285714285	0.16379310344827586	0.024793388429752067	0.0877193	0.1346153846153846	0.08	0.0196078	0.044444444444444446	0	0	0.0972973	0.0940171	0.0526316	0.0566038	0.132013	0.038461538461538464
Ancestry of hiPSC Lines - Asian (30)	0	0	1	0.0425532	0	0.045454545454545456	0.025	0	0.025641	0	0	0.027027	0	0	0	0	0	0.0967742	0	0.0782609	0.0666667	0.0555556	0.0810811	0.027027	0.0958466	0.25862068965517243	0.40298507462686567	0	0.0810811	0.4225352112676056	0.0285714	0	0	0.0909091	0.13157894736842105	0.17894736842105263	0.0204082	0	0.024390243902439025	0	0	0.029411764705882353	0	0.13690476190476192	0.0545455	0	0	0.0996678	0
Ancestry of hiPSC Lines - African (1)	0.00826446	0	0	0	0	0	0	0	0	0	0	0	0	0	0	0	0	0.00322581	0	0.00458716	0	0	0	0	0.00319489	0.00862069	0.015625	0	0	0.014084507042253521	0	0	0	0.00980392	0.00438596	0	0	0	0	0	0	0	0	0	0	0.0555556	0	0.00332226	0
hiPSC Backbone Media - mTeSR (102)	0.26704545454545453	0	0.0909091	0.1	0.017241379310344827	0.102804	0.10784313725490197	0.0181818	0.00900901	0.0183486	0.00917431	0.00917431	0.0380952	0	0.038834951456310676	0.00952381	0.00952381	0.32051282051282054	0	0.2648221343873518	0.13432835820895522	0.0661157	0.046729	0.028037383177570093	0.321656	0.3374233128834356	0.296875	0.0909091	0.046729	0.2013888888888889	0.14285714285714285	0.0909091	0.00980392	0	0.4473684210526316	0.045454545454545456	0.025210084033613446	0	0.00884956	0.00900901	0	0	0	0.3556701030927835	0.13253012048192772	0.0526316	0.045045	0.3388704318936877	0.017857142857142856
hiPSC Backbone Media - Reported (228)	0.41295546558704455	0.0110701	0.13157894736842105	0.0786026	0.012448132780082987	0.0655022	0.0482456	0.039301310043668124	0.034782608695652174	0.025974025974025976	0.00854701	0.0350877	0.026200873362445413	0.0263158	0.021929824561403508	0.017543859649122806	0.017543859649122806	0.7188498402555911	0.013157894736842105	0.48172757475083056	0.16806722689075632	0.10869565217391304	0.043859649122807015	0.0305677	0.7229299363057324	0.46382978723404256	0.26956521739130435	0.15879828326180256	0.043859649122807015	0.28879310344827586	0.16379310344827586	0.13157894736842105	0.00438596	0.4473684210526316	0	0.35964912280701755	0.0877193	0.0745614	0.0526316	0.043859649122807015	0.021929824561403508	0.021929824561403508	0.00438596	0.6141078838174274	0.14181818181818182	0.0603448	0.056768558951965066	0.7401315789473685	0.034482758620689655
hiPSC Backbone Media - Essential 8 (82)	0.2155688622754491	0.015873015873015872	0.17894736842105263	0.052083333333333336	0	0.031578947368421054	0	0.010989	0.0697674	0	0	0.0714286	0.047058823529411764	0	0.023529411764705882	0.023809523809523808	0.011764705882352941	0.2604501607717042	0	0.2	0.1092436974789916	0.09	0.0697674	0.046511627906976744	0.26198083067092653	0.2147239263803681	0.18699186991869918	0.0689655	0.045454545454545456	0.1417910447761194	0.024793388429752067	0.17894736842105263	0	0.045454545454545456	0.35964912280701755	0	0.00990099	0	0.021739130434782608	0.010989	0	0	0	0.2857142857142857	0.0909091	0.010101010101010102	0.043478260869565216	0.2724252491694352	0.056179775280898875
hiPSC Backbone Media - Embryonic Stem Cell (20)	0.0522388	0	0.0204082	0.0263158	0	0.125	0	0.1111111111111111	0.034482758620689655	0.16	0	0	0	0	0	0	0.0909091	0.0645161	0	0.0625	0.029411764705882353	0.044444444444444446	0.034482758620689655	0.037037037037037035	0.0638978	0.0708661	0.037037037037037035	0.0877193	0.034482758620689655	0.0705882	0.0877193	0.0204082	0	0.025210084033613446	0.0877193	0.00990099	0	0.027777777777777776	0	0	0.25	0.25	0	0.0647059	0.00952381	0.15151515151515152	0.0625	0.0664452	0.0322581
hiPSC Backbone Media - Specialised (17)	0.078125	0.016129032258064516	0	0	0.03125	0	0	0	0	0	0.041666666666666664	0	0	0.2777777777777778	0	0.05	0	0.054838709677419356	0	0.049107142857142856	0.015151515151515152	0.1282051282051282	0	0	0.054313099041533544	0.0555556	0.0125	0.0925926	0.038461538461538464	0.0864198	0.1346153846153846	0	0	0	0.0745614	0	0.027777777777777776	0	0	0	0	0	0	0.0658683	0.019801980198019802	0	0	0.046052631578947366	0
hiPSC Backbone Media - Conditioned (12)	0.015267175572519083	0	0.024390243902439025	0.10714285714285714	0	0	0	0.1	0	0	0	0	0.0555556	0.058823529411764705	0	0	0	0.0387097	0.25	0.036036036036036036	0.0508475	0.0263158	0	0	0.038338658146964855	0.0666667	0.013333333333333334	0.125	0.047619047619047616	0.0641026	0.08	0.024390243902439025	0	0.00884956	0.0526316	0.021739130434782608	0	0	0	0.1	0	0	0	0.048484848484848485	0.020833333333333332	0	0.0833333	0.0398671	0
hiPSC Backbone Media - DMEM (10)	0.0396825	0	0	0.11538461538461539	0	0	0	0.0526316	0	0	0	0.058823529411764705	0.0625	0	0	0	0	0.0322581	0	0.017857142857142856	0.1111111111111111	0	0	0	0.0319489	0.0413223	0.0136986	0.0833333	0	0.0125	0.0196078	0	0	0.00900901	0.043859649122807015	0.010989	0	0	0.1	0	0	0	0	0.023952095808383235	0.0322581	0.037037037037037035	0.0909091	0.0332226	0
hiPSC Backbone Media - StemFit (5)	0.016129032258064516	0	0	0	0	0	0	0.0714286	0	0.16666666666666666	0	0	0	0	0	0	0	0.016129032258064516	0	0.0182648	0.018518518518518517	0	0	0	0.0159744	0.0168067	0	0.044444444444444446	0	0.027027	0.044444444444444446	0	0	0	0.021929824561403508	0	0.25	0	0	0	0	0	0	0.018404907975460124	0	0.045454545454545456	0	0.016611295681063124	0.0625
hiPSC Backbone Media - StemFlex (5)	0	0	0.029411764705882353	0	0	0.16666666666666666	0	0	0.0714286	0	0	0	0	0	0	0	0.2857142857142857	0.016129032258064516	0	0.00904977	0.018518518518518517	0.0322581	0	0.0833333	0.0159744	0.025423728813559324	0.045454545454545456	0	0	0.013333333333333334	0	0.029411764705882353	0	0	0.021929824561403508	0	0.25	0	0	0	0	0	0	0.031055900621118012	0	0	0	0.016611295681063124	0
hiPSC Backbone Media - Differentiation (1)	0.00826446	0	0	0	0	0	0	0	0	0	0	0	0	0	0	0	0	0.00322581	0	0	0.02	0	0	0	0.00319489	0	0	0	0	0	0	0	0	0	0.00438596	0	0	0	0	0	0	0	0	0	0	0.0555556	0	0.00332226	0
hiPSC-CM Backbone Media - RPMI-1640 (161)	0.323944	0.019704433497536946	0.13690476190476192	0.097561	0.017241379310344827	0.0858896	0.0361446	0.011834319526627219	0.049079754601226995	0	0.011976047904191617	0.0368098	0.024390243902439025	0.024539877300613498	0.031055900621118012	0.018518518518518517	0.024844720496894408	0.5144694533762058	0.012345679012345678	0.39338235294117646	0.14673913043478262	0.10588235294117647	0.030120481927710843	0.024242424242424242	0.5143769968051118	0.35784313725490197	0.25	0.12154696132596685	0.0363636	0.20833333333333334	0.0972973	0.13690476190476192	0	0.3556701030927835	0.6141078838174274	0.2857142857142857	0.0647059	0.0658683	0.048484848484848485	0.023952095808383235	0.018404907975460124	0.031055900621118012	0	0	0	0.00561798	0.00574713	0.5348837209302325	0.00581395
hiPSC-CM Backbone Media - iCell Maintenance Medium (86)	0.11290322580645161	0.3894736842105263	0.0545455	0.019417475728155338	0.0625	0	0.0543478	0.010526315789473684	0.010526315789473684	0.010638297872340425	0.056179775280898875	0.021739130434782608	0.010869565217391304	0.010989	0	0	0	0.2733118971061093	0.011363636363636364	0.26141078838174275	0.10569105691056911	0.0366972	0.0212766	0.032967	0.27070063694267515	0.12849162011173185	0.10294117647058823	0.0578512	0.0212766	0.12142857142857143	0.0940171	0.0545455	0	0.13253012048192772	0.14181818181818182	0.0909091	0.00952381	0.019801980198019802	0.020833333333333332	0.0322581	0	0	0	0	0	0	0	0.2857142857142857	0
hiPSC-CM Backbone Media - DMEM (18)	0.061068702290076333	0	0	0	0.030303030303030304	0.0625	0	0.12	0.037037037037037035	0.125	0	0	0	0	0	0	0	0.0580645	0	0.0630631	0.046153846153846156	0	0.037037037037037035	0	0.057508	0.0551181	0.0379747	0.0714286	0	0.047058823529411764	0.0526316	0	0.0555556	0.0526316	0.0603448	0.010101010101010102	0.15151515151515152	0	0	0.037037037037037035	0.045454545454545456	0	0.0555556	0.00561798	0	0	0	0.059800664451827246	0
hiPSC-CM Backbone Media - StemPro-34 (14)	0.0714286	0	0	0	0	0	0	0.14285714285714285	0	0.0952381	0	0	0	0	0	0	0	0.0418006	0	0.0403587	0.0322581	0.025	0.043478260869565216	0.047619047619047616	0.0447284	0.023622047244094488	0	0.0566038	0	0.036585365853658534	0.0566038	0	0	0.045045	0.056768558951965066	0.043478260869565216	0.0625	0	0.0833333	0.0909091	0	0	0	0.00574713	0	0	0	0.046511627906976744	0
hiPSC-CM Backbone Media - Reported (301)	0.3881578947368421	0.1377049180327869	0.0996678	0.0631229	0.0462046	0.053156146179401995	0.036544850498338874	0.0332226	0.0332226	0.026490066225165563	0.026578073089700997	0.026578073089700997	0.019867549668874173	0.016556291390728478	0.016611295681063124	0.013289036544850499	0.013289036544850499	0.952077	0.00996678	0.6741935483870968	0.15460526315789475	0.0860927	0.0332226	0.026578073089700997	0.9554140127388535	0.3717105263157895	0.20860927152317882	0.132013	0.0332226	0.22772277227722773	0.132013	0.0996678	0.00332226	0.3388704318936877	0.7401315789473685	0.2724252491694352	0.0664452	0.046052631578947366	0.0398671	0.0332226	0.016611295681063124	0.016611295681063124	0.00332226	0.5348837209302325	0.2857142857142857	0.059800664451827246	0.046511627906976744	0	0.0398671
hiPSC-CM Backbone Media - Commercial Cardiomyocyte Kit (12)	0.064	0	0	0	0	0	0	0	0	0.05	0.0526316	0	0.0555556	0	0	0.0666667	0	0.0387097	0	0.040724	0.0163934	0.0540541	0	0	0.038338658146964855	0.024	0.013333333333333334	0.038461538461538464	0	0.024691358024691357	0.038461538461538464	0	0	0.017857142857142856	0.034482758620689655	0.056179775280898875	0.0322581	0	0	0	0.0625	0	0	0.00581395	0	0	0	0.0398671	0
hiPSC-CM Backbone Media - IMDM/E8/BPEL/APEL (8)	0.0403226	0.018867924528301886	0.027027	0.038461538461538464	0	0	0	0.058823529411764705	0	0.0625	0	0	0	0	0	0	0	0.025806451612903226	0	0.013452914798206279	0.0357143	0.029411764705882353	0.125	0	0.025559105431309903	0.0333333	0	0.041666666666666664	0.125	0.039473684210526314	0.0638298	0.027027	0	0	0.026087	0.058823529411764705	0	0.041666666666666664	0	0	0	0	0	0	0	0	0	0.026578073089700997	0
hiPSC-CM Backbone Media - Cor.4U Complete Medium (6)	0	0	0	0	0.375	0	0	0	0	0	0	0	0	0	0	0	0	0.0193548	0	0.0228311	0.0181818	0	0	0	0.019169329073482427	0	0	0	0	0	0	0	0	0.00934579	0.00429185	0	0	0	0	0	0	0	0	0.0060241	0	0.043478260869565216	0	0.019933554817275746	0
2D Surface - Reported (137)(177)	0.33035714285714285	0.15544041450777202	0.0670103	0.053763440860215055	0.0604396	0.0546448	0.0273224	0.0218579	0.027472527472527472	0.0333333	0.022099447513812154	0.0393258	0.00546448	0	0.011111111111111112	0.016853932584269662	0.0111732	0.5608974358974359	0	0.4259927797833935	0.1407035175879397	0.10270270270270271	0.0331492	0.0335196	0.5654952076677316	0.23109243697478993	0.13679245283018868	0.11734693877551021	0.016304347826086956	0.13761467889908258	0.0895522	0.0670103	0	0.25675675675675674	0.43617021276595747	0.25120772946859904	0.047872340425531915	0.031914893617021274	0.021621621621621623	0.0218579	0.00552486	0.011111111111111112	0	0.35743	0.24056603773584906	0.037234	0.0380435	0.5419354838709678	0.0441989
2D Surface - ECM-coated (114)	0.27717391304347827	0.1347517730496454	0.0666667	0.0390625	0.0483871	0.056910569105691054	0.0245902	0.0163934	0.024793388429752067	0.0165289	0.016666666666666666	0.042735042735042736	0.00833333	0	0.00847458	0.026087	0.00854701	0.3633440514469453	0	0.2720306513409962	0.1310344827586207	0.128	0.0420168	0.025210084033613446	0.36421725239616615	0.16751269035532995	0.1125	0.0833333	0.024793388429752067	0.10778443113772455	0.0684932	0.0666667	0	0.20670391061452514	0.3053435114503817	0.1951219512195122	0.0387597	0.0396825	0.024390243902439025	0.024793388429752067	0	0	0	0.27906976744186046	0.1834319526627219	0.03125	0.0322581	0.3517915309446254	0.05
2D Surface - Micropatterned (24)	0.0740741	0.029411764705882353	0.058823529411764705	0.023809523809523808	0.0526316	0.0526316	0.029411764705882353	0	0.0625	0.03125	0	0.0666667	0	0	0	0	0.037037037037037035	0.0774194	0	0.0614035	0.0571429	0.0625	0.030303030303030304	0.0666667	0.0766773	0.0526316	0.047619047619047616	0.03125	0.030303030303030304	0.0555556	0.03125	0.058823529411764705	0	0.0769231	0.0862069	0.0927835	0.0731707	0	0.0285714	0	0	0.0740741	0	0.0693642	0.0679612	0.024390243902439025	0.0555556	0.0761589	0
2D Surface - Hydrogel (14)	0.038461538461538464	0.034482758620689655	0	0.0645161	0.0714286	0.0714286	0	0	0.043478260869565216	0	0	0	0	0	0	0	0.058823529411764705	0.0451613	0	0.0403587	0.0322581	0.0512821	0	0.047619047619047616	0.0447284	0.0483871	0.0540541	0.037037037037037035	0	0	0	0	0	0.0740741	0.047619047619047616	0.0322581	0.030303030303030304	0	0	0	0	0.0555556	0	0.0670732	0.0204082	0.0322581	0	0.0430464	0
2D Surface - Electrospun (13)	0.022900763358778626	0.0535714	0	0.0666667	0	0	0.043478260869565216	0.0952381	0	0.15789473684210525	0.05	0	0	0	0	0	0	0.041935483870967745	0	0.05	0.0327869	0	0	0	0.0415335	0.0487805	0.013157894736842105	0.1	0	0.05	0.0784314	0	0	0.036036036036036036	0.034334763948497854	0.0326087	0.03125	0	0.041666666666666664	0	0.058823529411764705	0	0	0.017543859649122806	0.0645161	0	0.038461538461538464	0.0431894	0.041666666666666664
2D Surface - Microelectrode Array (9)	0.00775194	0.0784314	0	0	0.13636363636363635	0	0	0	0	0	0.0625	0	0	0	0.0769231	0	0	0.0290323	0	0.0365297	0.017241379310344827	0	0	0	0.028754	0.00806452	0.013888888888888888	0	0	0.012658227848101266	0.02	0	0	0	0.0128205	0.0224719	0	0.04	0	0	0	0	0	0.017964071856287425	0.043956	0	0	0.029900332225913623	0
2D Surface - Nanotopography (6)	0.016	0	0.058823529411764705	0.041666666666666664	0	0	0	0	0	0	0	0	0	0	0	0	0	0.0160772	0	0.0228311	0	0.03125	0	0	0.019169329073482427	0.025210084033613446	0.029411764705882353	0.0212766	0	0.0266667	0	0.058823529411764705	0	0	0.012987012987012988	0.023255813953488372	0	0	0	0.0666667	0	0	0	0.012121212121212121	0.010989	0	0	0.013201320132013201	0.058823529411764705
2D Surface - Decellularized ECM (3)	0.024793388429752067	0	0	0	0	0	0	0	0	0	0	0	0	0	0	0	0	0.00967742	0	0.013761467889908258	0	0	0	0	0.00958466	0.017094017094017096	0.015151515151515152	0.022727272727272728	0	0.0136986	0.022727272727272728	0	0	0.00961538	0.00873362	0.011904761904761904	0	0	0	0	0	0	0	0.00613497	0.011363636363636364	0.05	0	0.00996678	0
2D Surface - Microparticle/fluid (3)	0.0163934	0	0	0	0	0	0	0	0.0833333	0	0	0	0	0	0	0	0	0.00967742	0	0.00913242	0.019230769230769232	0	0	0	0.00958466	0	0	0	0	0	0	0	0	0	0.013157894736842105	0.036585365853658534	0	0	0	0	0	0	0	0.018633540372670808	0	0	0	0.00996678	0
3D Platform - Reported (154)	0.23873873873873874	0.0989011	0.13580246913580246	0.048484848484848485	0.030303030303030304	0.055900621118012424	0.050955414012738856	0.0379747	0.0379747	0.01875	0.0253165	0.018867924528301886	0.0387097	0.038961	0.019230769230769232	0.00636943	0.00636943	0.48717948717948717	0.0194805	0.4037735849056604	0.1270718232044199	0.077381	0.044585987261146494	0.018867924528301886	0.4872611464968153	0.34328358208955223	0.24571428571428572	0.10112359550561797	0.0512821	0.2640449438202247	0.15976331360946747	0.13580246913580246	0	0.2736318407960199	0.4580152671755725	0.1919191919191919	0.0674847	0.0822785	0.0440252	0.0379747	0.025806451612903226	0.012738853503184714	0	0.3815789473684211	0.18226600985221675	0.0424242	0.0632911	0.4869281045751634	0.024691358024691357
3D Platform - Fibrin (50)	0.0754717	0.0666667	0.1267605633802817	0.045454545454545456	0.015384615384615385	0.0645161	0.0517241	0	0.0169492	0.017241379310344827	0.0357143	0.0357143	0.0555556	0.12	0.018518518518518517	0	0	0.15755627009646303	0	0.13559322033898305	0.0869565	0.1	0.034482758620689655	0	0.15605095541401273	0.2028985507246377	0.17525773195876287	0.10843373493975904	0.034482758620689655	0.18627450980392157	0.13580246913580246	0.1267605633802817	0	0.1259259259259259	0.16806722689075632	0.0819672	0.0447761	0.19642857142857142	0.0163934	0	0	0.0377358	0	0.1853932584269663	0.0542636	0.046153846153846156	0	0.14705882352941177	0.0333333
3D Platform - Scaffold Free (43)	0.0860927	0.1125	0.12307692307692308	0.0163934	0.0350877	0.0535714	0	0.06	0.06	0.04	0.02	0.02	0	0	0	0	0	0.13870967741935483	0	0.12987012987012986	0.0813953	0.029411764705882353	0.0816327	0	0.13738019169329074	0.10416666666666667	0.0918367	0.036585365853658534	0.06	0.11764705882352941	0.0625	0.12307692307692308	0	0.0820896	0.11065573770491803	0.0775862	0.0677966	0.0169492	0.018518518518518517	0.019230769230769232	0.0909091	0	0	0.10869565217391304	0.10256410256410256	0.0338983	0.0961538	0.14285714285714285	0.018518518518518517
3D Platform - Collagen (37)	0.11267605633802817	0.0375	0.046875	0.037037037037037035	0	0	0.043478260869565216	0	0.0681818	0	0.022727272727272728	0	0.1	0	0.024390243902439025	0	0	0.1157556270096463	0.0810811	0.12334801762114538	0.0357143	0.0666667	0	0.046511627906976744	0.1182108626198083	0.13333333333333333	0.12222222222222222	0.0821918	0.021739130434782608	0.10204081632653061	0.0972222	0.046875	0	0.12096774193548387	0.13733905579399142	0.12264150943396226	0.017857142857142856	0	0.11363636363636363	0.0930233	0	0	0	0.13142857142857142	0.0884956	0	0.0625	0.12292358803986711	0.020833333333333332
3D Platform - Matrigel (32)	0.0551724	0.0684932	0.0163934	0.0408163	0.0212766	0	0.0487805	0	0	0	0.0526316	0.025641	0.14705882352941177	0.0555556	0.0571429	0	0	0.0961538	0.09375	0.0822511	0.0789474	0.0535714	0.024390243902439025	0.0526316	0.0987261	0.11278195488721804	0.0666667	0.12121212121212122	0.024390243902439025	0.0842105	0.12121212121212122	0.0163934	0	0.0894309	0.1111111111111111	0.0857143	0	0.0888889	0.1282051282051282	0.0769231	0	0	0	0.0903955	0.0630631	0	0.0697674	0.0918033	0.047619047619047616
3D Platform - Decellularised (15)	0.0708661	0	0.022727272727272728	0	0	0	0.0833333	0	0	0	0	0	0.047619047619047616	0	0.0526316	0	0.0555556	0.0483871	0	0.0542986	0.0483871	0	0	0	0.0479233	0.0396825	0.0675676	0	0	0.0487805	0.0555556	0.022727272727272728	0	0.0934579	0.0565217	0.021052631578947368	0	0.0322581	0	0	0	0	0	0.060240963855421686	0.052083333333333336	0	0	0.0498339	0
3D Platform - 3D printed (9)	0.015625	0.0377358	0.0540541	0	0	0	0.0526316	0.0555556	0	0	0	0	0	0	0.0769231	0	0	0.0290323	0	0.0365297	0.017241379310344827	0	0	0	0.028754	0.0245902	0.0428571	0	0	0.038961	0.02	0.0540541	0	0.0183486	0.021551724137931036	0.0224719	0	0	0	0.0555556	0	0	0	0.024096385542168676	0.043956	0.038461538461538464	0	0.029900332225913623	0
3D Platform - Polyethylene Glycol (8)	0.0403226	0	0	0.08	0.043478260869565216	0.0909091	0	0	0	0	0	0	0	0	0	0	0	0.025806451612903226	0	0.0226244	0.0357143	0	0.058823529411764705	0	0.025559105431309903	0.024793388429752067	0.014084507042253521	0	0.125	0	0	0	0	0.028037383177570093	0.026087	0.034482758620689655	0.0769231	0	0	0	0	0	0	0.0304878	0.010752688172043012	0	0.047619047619047616	0.026578073089700997	0
3D Platform - Gelatin (6)	0.00793651	0	0	0	0.047619047619047616	0	0.0625	0.23076923076923078	0	0	0	0	0	0	0	0.1111111111111111	0	0.0193548	0	0.0228311	0	0	0	0.0769231	0.019169329073482427	0.00826446	0.014492753623188406	0	0	0.013157894736842105	0.0212766	0	0	0.0285714	0.0263158	0.011494252873563218	0.04	0	0	0.0666667	0	0	0	0.012121212121212121	0	0.0909091	0.0526316	0.019933554817275746	0.058823529411764705
3D Platform - Fibronectin (3)	0	0	0	0	0.0555556	0	0.0769231	0.18181818181818182	0	0	0	0	0	0	0	0	0	0.00967742	0	0.00913242	0	0	0	0.1	0.00958466	0.00847458	0.015151515151515152	0	0	0.0136986	0.022727272727272728	0	0	0.00961538	0.013157894736842105	0	0.045454545454545456	0	0	0.0833333	0	0	0	0.00613497	0	0.10526315789473684	0	0.00996678	0
3D Platform - Nanotechnology (3)	0	0.020833333333333332	0	0	0.0555556	0	0.0769231	0.0833333	0	0	0	0	0	0	0	0	0	0.00967742	0	0.00913242	0	0	0	0.1	0.00958466	0.00847458	0.015151515151515152	0	0	0.0136986	0.022727272727272728	0	0	0.00961538	0.00873362	0	0.045454545454545456	0	0	0	0	0	0	0.00613497	0.011363636363636364	0.05	0	0.00996678	0
2D % Confluency - 2D/3D Values (154)	0.3285024154589372	0.0204082	0.10179640718562874	0.0679012	0.011904761904761904	0.0625	0.03125	0.0512821	0.044585987261146494	0.0448718	0.00621118	0.0519481	0.0320513	0.0322581	0	0.025974025974025976	0.0193548	0.4919614147909968	0	0.3527272727272727	0.15254237288135594	0.11728395061728394	0.0379747	0.0318471	0.49201277955271566	0.37055837563451777	0.2247191011235955	0.16666666666666666	0.031446540880503145	0.23626373626373626	0.15294117647058825	0.10179640718562874	0.00649351	0.2864321608040201	0.5983263598326359	0.26881720430107525	0.0875	0.0961538	0.031055900621118012	0.0512821	0.025806451612903226	0.025806451612903226	0	0.4189189189189189	0.14285714285714285	0.0552147	0.0769231	0.4967105263157895	0.024691358024691357
2D % Confluency - Reported (236)	0.33707865168539325	0.18487394957983194	0.0725806	0.053719	0.058823529411764705	0.0543933	0.029166666666666667	0.0207469	0.0336134	0.0251046	0.029535864978902954	0.029535864978902954	0.0125	0.00414938	0.0211864	0.012658227848101266	0.012658227848101266	0.744409	0.012711864406779662	0.5494880546075085	0.15789473684210525	0.0958333	0.029288702928870293	0.0209205	0.7484076433121019	0.27075812274368233	0.15384615384615385	0.11646586345381527	0.025	0.15849056603773584	0.0988142	0.0725806	0	0.2706766917293233	0.4967741935483871	0.242188	0.044897959183673466	0.024291497975708502	0.0376569	0.0207469	0.00416667	0.0083682	0.00423729	0.4128113879003559	0.288	0.0539419	0.0245902	0.7211538461538461	0.0420168
2D % Confluency - 85 to 89 (31)	0.10948905109489052	0.013157894736842105	0.0338983	0.0638298	0	0.0930233	0	0	0.0512821	0	0	0.11428571428571428	0.027027	0	0	0.0606061	0	0.1	0	0.0686695	0.0945946	0.0943396	0.025	0.0540541	0.0990415	0.0970149	0.0795455	0.0735294	0.025	0.0408163	0.028169014084507043	0.0338983	0	0.0901639	0.12121212121212122	0.1414141414141414	0	0.043478260869565216	0.023809523809523808	0.025	0	0	0	0.12280701754385964	0.0733945	0	0	0.0993377	0.023809523809523808
2D % Confluency - EB (13)	0.0551181	0.017241379310344827	0	0.0322581	0	0	0	0.0952381	0	0.2222222222222222	0	0	0	0	0	0	0	0.041935483870967745	0	0.0358744	0.0677966	0.025641	0	0	0.0415335	0.0661157	0	0.1702127659574468	0	0.0769231	0.12244897959183673	0	0	0.026785714285714284	0.0387931	0.010638297872340425	0.13793103448275862	0.034482758620689655	0	0.045454545454545456	0	0	0	0.00578035	0.03125	0.14814814814814814	0.125	0.0431894	0
2D % Confluency - 95 to 100 (13)	0.0307692	0	0.0487805	0.0322581	0	0	0	0.045454545454545456	0.045454545454545456	0	0	0.16666666666666666	0	0	0	0	0.0625	0.041935483870967745	0	0.03125	0.0327869	0.0810811	0.045454545454545456	0	0.0415335	0.032	0.0266667	0.0377358	0	0.024390243902439025	0	0.0487805	0	0.026785714285714284	0.0570175	0.0795455	0	0.034482758620689655	0.041666666666666664	0.045454545454545456	0	0	0	0.0609756	0.020618556701030927	0	0	0.0431894	0
2D % Confluency - 90 to 94 (10)	0.048	0	0	0	0	0.0833333	0.05	0	0.0526316	0	0	0	0	0	0	0	0	0.0322581	0	0.0316742	0.0169492	0.0571429	0	0	0.0319489	0.0413223	0.0724638	0	0	0.0125	0.0196078	0	0	0.046729	0.043859649122807015	0.0574713	0	0	0	0	0	0	0	0.049079754601226995	0.0212766	0	0	0.0332226	0.047619047619047616
2D % Confluency - 70 to 79 (5)	0.0327869	0	0	0	0	0	0	0	0.0714286	0	0	0	0	0	0	0	0.125	0.016129032258064516	0	0.0045045	0.018518518518518517	0.0666667	0.0714286	0	0.0159744	0	0	0	0	0	0	0	0	0.038834951456310676	0.021929824561403508	0	0.041666666666666664	0	0	0	0	0.1111111111111111	0	0.024691358024691357	0.011111111111111112	0	0.0555556	0.016611295681063124	0
2D % Confluency - 80 to 84 (4)	0.00806452	0	0.030303030303030304	0	0	0.0526316	0	0	0	0	0	0	0	0	0	0.14285714285714285	0	0.012903225806451613	0	0.00452489	0.018867924528301886	0.0689655	0	0	0.012779552715654952	0.0169492	0.030303030303030304	0	0	0.013513513513513514	0	0.030303030303030304	0	0.00952381	0.017543859649122806	0.0361446	0	0	0	0	0	0	0	0.024844720496894408	0	0	0	0.013289036544850499	0
3D % Confluency - 2D/3D Values (154)	0.3285024154589372	0.0204082	0.10179640718562874	0.0679012	0.011904761904761904	0.0625	0.03125	0.0512821	0.044585987261146494	0.0448718	0.00621118	0.0519481	0.0320513	0.0322581	0	0.025974025974025976	0.0193548	0.4919614147909968	0	0.3527272727272727	0.15254237288135594	0.11728395061728394	0.0379747	0.0318471	0.49201277955271566	0.37055837563451777	0.2247191011235955	0.16666666666666666	0.031446540880503145	0.23626373626373626	0.15294117647058825	0.10179640718562874	0.00649351	0.2864321608040201	0.5983263598326359	0.26881720430107525	0.0875	0.0961538	0.031055900621118012	0.0512821	0.025806451612903226	0.025806451612903226	0	0.4189189189189189	0.14285714285714285	0.0552147	0.0769231	0.4967105263157895	0.024691358024691357
3D % Confluency - Reported (239)	0.33707865168539325	0.18487394957983194	0.0725806	0.053719	0.058823529411764705	0.0543933	0.029166666666666667	0.0207469	0.0336134	0.0251046	0.029535864978902954	0.029535864978902954	0.0125	0.00414938	0.0211864	0.012658227848101266	0.012658227848101266	0.744409	0.012711864406779662	0.5494880546075085	0.15789473684210525	0.0958333	0.029288702928870293	0.0209205	0.7484076433121019	0.27075812274368233	0.15384615384615385	0.11646586345381527	0.025	0.15849056603773584	0.0988142	0.0725806	0	0.2706766917293233	0.4967741935483871	0.242188	0.044897959183673466	0.024291497975708502	0.0376569	0.0207469	0.00416667	0.0083682	0.00423729	0.4128113879003559	0.288	0.0539419	0.0245902	0.7211538461538461	0.0420168
3D % Confluency - EB (31)	0.0551181	0.017241379310344827	0	0.0322581	0	0	0	0.0952381	0	0.2222222222222222	0	0	0	0	0	0	0	0.041935483870967745	0	0.0358744	0.0677966	0.025641	0	0	0.0415335	0.0661157	0	0.1702127659574468	0	0.0769231	0.12244897959183673	0	0	0.026785714285714284	0.0387931	0.010638297872340425	0.13793103448275862	0.034482758620689655	0	0.045454545454545456	0	0	0	0.00578035	0.03125	0.14814814814814814	0.125	0.0431894	0
3D % Confluency - 95 to 100 (15)	0.0307692	0	0.0487805	0.0322581	0	0	0	0.045454545454545456	0.045454545454545456	0	0	0.16666666666666666	0	0	0	0	0.0625	0.041935483870967745	0	0.03125	0.0327869	0.0810811	0.045454545454545456	0	0.0415335	0.032	0.0266667	0.0377358	0	0.024390243902439025	0	0.0487805	0	0.026785714285714284	0.0570175	0.0795455	0	0.034482758620689655	0.041666666666666664	0.045454545454545456	0	0	0	0.0609756	0.020618556701030927	0	0	0.0431894	0
3D % Confluency - 85 to 89 (12)	0.10948905109489052	0.013157894736842105	0.0338983	0.0638298	0	0.0930233	0	0	0.0512821	0	0	0.11428571428571428	0.027027	0	0	0.0606061	0	0.1	0	0.0686695	0.0945946	0.0943396	0.025	0.0540541	0.0990415	0.0970149	0.0795455	0.0735294	0.025	0.0408163	0.028169014084507043	0.0338983	0	0.0901639	0.12121212121212122	0.1414141414141414	0	0.043478260869565216	0.023809523809523808	0.025	0	0	0	0.12280701754385964	0.0733945	0	0	0.0993377	0.023809523809523808
3D % Confluency - 90 to 94 (11)	0.048	0	0	0	0	0.0833333	0.05	0	0.0526316	0	0	0	0	0	0	0	0	0.0322581	0	0.0316742	0.0169492	0.0571429	0	0	0.0319489	0.0413223	0.0724638	0	0	0.0125	0.0196078	0	0	0.046729	0.043859649122807015	0.0574713	0	0	0	0	0	0	0	0.049079754601226995	0.0212766	0	0	0.0332226	0.047619047619047616
3D % Confluency - 80 to 84 (6)	0.00806452	0	0.030303030303030304	0	0	0.0526316	0	0	0	0	0	0	0	0	0	0.14285714285714285	0	0.012903225806451613	0	0.00452489	0.018867924528301886	0.0689655	0	0	0.012779552715654952	0.0169492	0.030303030303030304	0	0	0.013513513513513514	0	0.030303030303030304	0	0.00952381	0.017543859649122806	0.0361446	0	0	0	0	0	0	0	0.024844720496894408	0	0	0	0.013289036544850499	0
3D % Confluency - 70 to 79 (4)	0.0327869	0	0	0	0	0	0	0	0.0714286	0	0	0	0	0	0	0	0.125	0.016129032258064516	0	0.0045045	0.018518518518518517	0.0666667	0.0714286	0	0.0159744	0	0	0	0	0	0	0	0	0.038834951456310676	0.021929824561403508	0	0.041666666666666664	0	0	0	0	0.1111111111111111	0	0.024691358024691357	0.011111111111111112	0	0.0555556	0.016611295681063124	0
hiPSC-CM Media Supplement - B27 (174)	0.32286995515695066	0.013824884792626729	0.14606741573033707	0.10285714285714286	0.010638297872340425	0.0795455	0.0632184	0.016574585635359115	0.0514286	0	0.00552486	0.045977	0.028409090909090908	0.011235955056179775	0.022857142857142857	0.011363636363636364	0.017142857142857144	0.5463258785942492	0.017241379310344827	0.4050179211469534	0.17277486910994763	0.0864865	0.033707865168539325	0.0282486	0.5509554140127388	0.4146341463414634	0.3076923076923077	0.1134020618556701	0.039548	0.23737373737373738	0.1134020618556701	0.14606741573033707	0	0.44502617801047123	0.6820083682008368	0.29949238578680204	0.0659341	0.026881720430107527	0.056818181818181816	0.033707865168539325	0.017045454545454544	0.028735632183908046	0	0.700508	0.1504424778761062	0.010526315789473684	0.010752688172043012	0.5780730897009967	0.00540541
hiPSC-CM Media Supplement - iCell Maintenance Medium (41)	0.00621118	0.6415094339622641	0	0.0169492	0.0555556	0	0	0.02	0	0.041666666666666664	0.0888889	0	0	0	0	0	0	0.13225806451612904	0	0.14096916299559473	0.0705882	0.014925373134328358	0	0.0425532	0.13099041533546327	0.026143790849673203	0	0.0506329	0	0.027522935779816515	0.0375	0	0	0	0.00373134	0.00819672	0	0	0	0	0	0	0	0	0.4431818181818182	0	0	0.1362126245847176	0
hiPSC-CM Media Supplement - L-ascorbic acid (39)	0.1510791366906475	0.011904761904761904	0.11290322580645161	0	0.018518518518518517	0.018518518518518517	0	0.0425532	0	0.0212766	0.021739130434782608	0.021739130434782608	0.022222222222222223	0.046511627906976744	0.047619047619047616	0.023809523809523808	0	0.12580645161290321	0	0.10775862068965517	0.047058823529411764	0.1	0.0652174	0.021739130434782608	0.12460063897763578	0.11510791366906475	0.10752688172043011	0.08	0	0.13402061855670103	0.0657895	0.11290322580645161	0.025641	0.101562	0.15086206896551724	0.14150943396226415	0.017241379310344827	0.12	0.0625	0.0425532	0	0	0	0.15606936416184972	0.00806452	0.017857142857142856	0.23255813953488372	0.12956810631229235	0
hiPSC-CM Media Supplement - Reported (275)	0.375	0.13427561837455831	0.10909090909090909	0.0690909	0.0246479	0.0581818	0.04	0.0326087	0.0363636	0.0252708	0.021660649819494584	0.0290909	0.021739130434782608	0.018115942028985508	0.0181818	0.010869565217391304	0.014545454545454545	0.8690095846645367	0.0109091	0.6163934426229508	0.16487455197132617	0.0824373	0.0326087	0.0290909	0.8726114649681529	0.3964285714285714	0.22826086956521738	0.14028776978417265	0.0326087	0.24014336917562723	0.13620071684587814	0.10909090909090909	0.00363636	0.35611510791366907	0.740484	0.27956989247311825	0.0649819	0.046595	0.0436364	0.0326087	0.014492753623188406	0.0181818	0.00363636	0.5797101449275363	0.26666666666666666	0.0615942	0.0471014	0.9136212624584718	0.021352313167259787
hiPSC-CM Media Supplement - Albumin (23)	0.11627906976744186	0.014705882352941176	0.06	0	0.0263158	0	0	0	0	0	0.0333333	0	0	0.0740741	0.037037037037037035	0.038461538461538464	0	0.0741935	0	0.061674	0.028169014084507043	0.1111111111111111	0.0645161	0	0.0734824	0.061068702290076333	0.0357143	0.0833333	0	0.0804598	0.0655738	0.06	0	0.0504202	0.0865801	0.0824742	0	0.17647058823529413	0	0	0	0	0	0.12195121951219512	0	0.025	0	0.076412	0.029411764705882353
hiPSC-CM Media Supplement - L-glutamine (19)	0.0687023	0.015625	0.020833333333333332	0.0555556	0	0	0	0.16	0.0357143	0.0769231	0	0	0	0.041666666666666664	0	0	0	0.0612903	0	0.0533333	0.0615385	0.0697674	0	0	0.0607029	0.0714286	0.024691358024691357	0.10909090909090909	0.0357143	0.0843373	0.10909090909090909	0.020833333333333332	0	0.0431034	0.0692641	0.052083333333333336	0.0263158	0.0285714	0.14814814814814814	0.0357143	0	0	0	0.034482758620689655	0.019417475728155338	0.027777777777777776	0.2692307692307692	0.0631229	0.0333333
hiPSC-CM Media Supplement - HEPES (16)	0.0787402	0.0163934	0	0	0.0322581	0.0322581	0	0	0	0	0.043478260869565216	0	0	0.2222222222222222	0	0	0	0.0516129	0	0.0493274	0.03125	0.075	0	0	0.051118210862619806	0.056	0.012658227848101266	0.11538461538461539	0	0.0609756	0.0943396	0	0	0.00854701	0.0608696	0.0425532	0.0285714	0.32	0.037037037037037035	0	0	0	0	0.0727273	0.00990099	0.0625	0	0.053156146179401995	0
hiPSC-CM Media Supplement - FBS (16)	0.0378788	0	0	0.029411764705882353	0.0322581	0.0666667	0	0.0833333	0.04	0.13636363636363635	0	0	0	0.047619047619047616	0	0	0	0.0516129	0	0.0540541	0.03125	0.023809523809523808	0.04	0	0.051118210862619806	0.0645161	0.025641	0.0943396	0.04	0.0609756	0.0943396	0	0	0.0350877	0.0562771	0.010309278350515464	0.125	0.0645161	0	0.0833333	0.05	0	0	0.011428571428571429	0.030303030303030304	0.4166666666666667	0	0.053156146179401995	0.0769231
hiPSC-CM Media Supplement - 1-thioglycerol (14)	0.0546875	0	0.047619047619047616	0	0	0	0	0.0909091	0	0.045454545454545456	0	0	0	0.1111111111111111	0	0	0	0.0451613	0	0.0403587	0.0322581	0.025	0.0909091	0	0.0447284	0.0483871	0.012987012987012988	0.0769231	0.043478260869565216	0.0759494	0.0980392	0.047619047619047616	0	0.0265487	0.056768558951965066	0.0322581	0.030303030303030304	0.10714285714285714	0.13043478260869565	0.043478260869565216	0	0	0	0.029411764705882353	0	0.0322581	0.3333333333333333	0.046511627906976744	0
hiPSC-CM Media Supplement - Specialised (13)	0.0634921	0.017241379310344827	0	0	0.0740741	0	0	0	0	0	0	0	0.0526316	0	0	0	0.0625	0.041935483870967745	0	0.0358744	0.05	0	0.0952381	0	0.0415335	0.015748031496062992	0.013157894736842105	0.018518518518518517	0	0.012048192771084338	0.018518518518518517	0	0	0.036036036036036036	0.0524017	0.0795455	0	0	0	0	0	0	0.0769231	0.029585798816568046	0	0.14814814814814814	0	0.0431894	0.13636363636363635
hiPSC-CM Media Supplement - Transferrin (11)	0.056	0.017857142857142856	0.025	0	0.038461538461538464	0	0	0	0	0	0.0555556	0	0	0.13333333333333333	0	0	0	0.035483870967741936	0	0.026905829596412557	0.016666666666666666	0.0857143	0.05	0	0.0351438	0.058333333333333334	0.013513513513513514	0.10416666666666667	0.05	0.0789474	0.10416666666666667	0.025	0.0909091	0.018018018018018018	0.043668122270742356	0.010869565217391304	0.0333333	0.21739130434782608	0.045454545454545456	0.05	0	0	0	0.029940119760479042	0	0.0740741	0.13636363636363635	0.036544850498338874	0
hiPSC-CM Media Supplement - Mercaptoethanol (10)	0.0396825	0.0181818	0	0.0357143	0	0.0833333	0	0.0526316	0.0526316	0.0555556	0	0	0	0	0	0	0	0.0322581	0	0.0363636	0.034482758620689655	0	0	0	0.0319489	0.0677966	0.0724638	0.061224489795918366	0	0.038461538461538464	0.061224489795918366	0	0	0.046729	0.030303030303030304	0.022222222222222223	0	0	0	0	0	0	0	0.017857142857142856	0.010526315789473684	0.12	0	0.0332226	0
hiPSC-CM Media Supplement - GlutaMax (8)	0.0487805	0	0	0.038461538461538464	0	0	0	0	0	0	0	0	0	0	0	0	0.0909091	0.025806451612903226	0	0.013452914798206279	0.0357143	0.029411764705882353	0.058823529411764705	0.0666667	0.025559105431309903	0.024793388429752067	0	0.0638298	0	0.0128205	0.0204082	0	0	0.028037383177570093	0.0350877	0.046511627906976744	0.037037037037037035	0	0	0.058823529411764705	0	0	0	0.024242424242424242	0.021739130434782608	0.04	0.047619047619047616	0.026578073089700997	0
hiPSC-CM Media Supplement - Selenium (7)	0.0322581	0.019230769230769232	0	0	0.045454545454545456	0	0	0	0	0	0.0714286	0	0	0.18181818181818182	0	0	0	0.0225806	0	0.0180995	0.017857142857142856	0.0625	0	0	0.022364217252396165	0.0423729	0.014285714285714285	0.0888889	0	0.0540541	0.0652174	0	0.14285714285714285	0.018691588785046728	0.0307018	0	0	0.2631578947368421	0	0	0	0	0	0.0306748	0	0.0869565	0	0.023255813953488372	0
hiPSC-CM Media Supplement - Nonessential Amino Acids (7)	0.0322581	0	0	0	0	0.0952381	0	0	0.0625	0	0	0	0	0	0	0	0	0.0225806	0	0.0273973	0.017857142857142856	0	0	0	0.022364217252396165	0.0423729	0.0441176	0.0425532	0	0.04	0.0652174	0	0	0.0283019	0.026200873362445413	0.022988505747126436	0	0	0	0.0625	0	0	0	0.00598802	0.021978	0.13636363636363635	0	0.023255813953488372	0
hiPSC-CM Media Supplement - Polyvinylalchohol (6)	0.024193548387096774	0.0196078	0	0	0.047619047619047616	0	0	0	0	0	0.0769231	0	0	0.2	0	0	0	0.0193548	0	0.013574660633484163	0.0181818	0.0645161	0	0	0.019169329073482427	0.0338983	0	0.0909091	0	0.0547945	0.0909091	0	0	0	0.0263158	0.011494252873563218	0	0.2777777777777778	0	0	0	0	0	0.030864197530864196	0	0	0	0.019933554817275746	0.058823529411764705
hiPSC-CM Media Supplement - Essential Lipids (6)	0.024193548387096774	0.0196078	0	0	0.047619047619047616	0	0	0	0	0	0.0769231	0	0	0.2	0	0	0	0.0193548	0	0.013574660633484163	0.0181818	0.0645161	0	0	0.019169329073482427	0.0338983	0	0.0909091	0	0.0547945	0.0909091	0	0	0	0.0263158	0.011494252873563218	0	0.2777777777777778	0	0	0	0	0	0.030864197530864196	0	0	0	0.019933554817275746	0.058823529411764705
hiPSC-CM Media Supplement - Lipid Mix (5)	0.016129032258064516	0.02	0	0	0.05	0	0	0	0	0	0.0833333	0	0	0.2222222222222222	0	0	0	0.016129032258064516	0	0.013636363636363636	0	0.0666667	0	0	0.0159744	0.025423728813559324	0	0.0681818	0	0.0410959	0.0681818	0	0	0	0.021929824561403508	0	0	0.29411764705882354	0	0	0	0	0	0.031055900621118012	0	0	0	0.016611295681063124	0
hiPSC-CM Media Supplement - VEGF (4)	0.016260162601626018	0	0	0	0	0	0	0.16666666666666666	0	0.0833333	0	0	0	0	0	0	0	0.012903225806451613	0	0.00452489	0.038461538461538464	0.0333333	0	0	0.012779552715654952	0.0169492	0	0.045454545454545456	0	0.0273973	0.045454545454545456	0	0	0.00952381	0.017543859649122806	0	0.14285714285714285	0	0	0	0.125	0	0	0.00609756	0	0	0.2	0.013289036544850499	0
hiPSC-CM Media Supplement - bFGF (3)	0.0163934	0	0	0	0	0	0	0.0833333	0	0.0909091	0	0	0	0	0	0	0	0.00967742	0	0.00454545	0.019230769230769232	0	0.0833333	0	0.00958466	0.00847458	0	0.022727272727272728	0	0.0136986	0.022727272727272728	0	0	0.019417475728155338	0.013157894736842105	0	0.045454545454545456	0	0	0	0	0	0	0.00613497	0	0	0.13333333333333333	0.00996678	0
Induction Conditions - CHIR99021 (174)	0.35944700460829493	0.013824884792626729	0.15254237288135594	0.0722222	0.010638297872340425	0.0857143	0.0632184	0.016574585635359115	0.0514286	0.00549451	0.011111111111111112	0.045977	0.028409090909090908	0.00558659	0.028735632183908046	0.017142857142857144	0.022988505747126436	0.5562700964630225	0	0.38515901060070673	0.17277486910994763	0.0983607	0.0514286	0.0282486	0.5559105431309904	0.3942307692307692	0.3149171270718232	0.0909091	0.039548	0.23737373737373738	0.1076923076923077	0.15254237288135594	0.00574713	0.40816326530612246	0.6680497925311203	0.3689839572192513	0.0659341	0.026881720430107527	0.0163934	0.027932960893854747	0.017045454545454544	0.028735632183908046	0	0.6028708133971292	0.14537444933920704	0.0322581	0.00534759	0.5728476821192053	0.010869565217391304
Induction Conditions - Reported (238)	0.4302788844621514	0.014285714285714285	0.12605042016806722	0.0798319	0.0119522	0.0672269	0.046218487394957986	0.0420168	0.0376569	0.037815126050420166	0.012345679012345678	0.0336134	0.020833333333333332	0.025210084033613446	0.0210084	0.012552301255230125	0.0168067	0.7564102564102564	0.012605042016806723	0.52	0.16129032258064516	0.10416666666666667	0.0420168	0.029288702928870293	0.7603833865814696	0.4567901234567901	0.25833333333333336	0.16666666666666666	0.0376569	0.2875	0.16666666666666666	0.12605042016806722	0.00420168	0.4107883817427386	0.8790322580645161	0.3168724279835391	0.0840336	0.0669456	0.0504202	0.0376569	0.0210084	0.0210084	0.00420168	0.6352459016393442	0.13286713286713286	0.0622407	0.058823529411764705	0.7672131147540984	0.0288066
Induction Conditions - Activin A (75)	0.18787878787878787	0.00833333	0.0606061	0.10588235294117647	0.011111111111111112	0.045977	0	0.1038961038961039	0	0.0769231	0.024691358024691357	0	0.025	0.0657895	0.012658227848101266	0	0	0.2379421221864952	0.04	0.21074380165289255	0.0964912	0.0625	0.0493827	0.0375	0.23961661341853036	0.2565789473684211	0.0859375	0.23157894736842105	0.0759494	0.21666666666666667	0.20618556701030927	0.0606061	0.013333333333333334	0.17218543046357615	0.30042918454935624	0.0902778	0.091954	0.13580246913580246	0.14473684210526316	0.0759494	0.025641	0	0.013333333333333334	0.20408163265306123	0.0522876	0.10714285714285714	0.17105263157894737	0.24092409240924093	0.011627906976744186
Induction Conditions - BMP4 (74)	0.2037037037037037	0.00840336	0.0721649	0.0941176	0.011235955056179775	0.011235955056179775	0	0.10526315789473684	0	0.0921053	0.025	0	0.0253165	0.0666667	0.0128205	0	0	0.2347266881028939	0.0266667	0.18699186991869918	0.11711711711711711	0.0631579	0.0769231	0.0379747	0.2364217252396166	0.23376623376623376	0.0615385	0.23404255319148937	0.0769231	0.2288135593220339	0.20833333333333334	0.0721649	0.013513513513513514	0.13548387096774195	0.2905982905982906	0.0985915	0.10588235294117647	0.1518987341772152	0.13157894736842105	0.0909091	0.039473684210526314	0	0.013513513513513514	0.175	0.0457516	0.13580246913580246	0.1891891891891892	0.23355263157894737	0.023809523809523808
Induction Conditions - bFGF (45)	0.11409395973154363	0.011111111111111112	0.0273973	0.015873015873015872	0.016666666666666666	0.016666666666666666	0	0.1702127659574468	0	0.125	0.019230769230769232	0	0.0196078	0.10869565217391304	0.0204082	0	0	0.14516129032258066	0.043478260869565216	0.12875536480686695	0.091954	0.0746269	0.018518518518518517	0.019230769230769232	0.14376996805111822	0.15	0.0380952	0.20833333333333334	0.0377358	0.1836734693877551	0.22535211267605634	0.0273973	0.022222222222222223	0.0652174	0.16666666666666666	0.040983606557377046	0.14035087719298245	0.19230769230769232	0.14	0.057692307692307696	0.041666666666666664	0	0.022222222222222223	0.10160427807486631	0.0396825	0.16666666666666666	0.1568627450980392	0.1419141914191419	0.017857142857142856
Induction Conditions - Specialised (5)	0.016129032258064516	0.02	0	0.0909091	0	0	0	0	0	0	0	0	0	0	0	0	0	0.012861736334405145	0	0.0182648	0.018518518518518517	0	0	0	0.0159744	0.0168067	0	0.044444444444444446	0	0	0	0	0	0.028846153846153848	0.013043478260869565	0	0	0	0	0	0	0	0	0.018404907975460124	0	0.045454545454545456	0	0.016611295681063124	0
Induction Conditions - StemCell Differentiation Kit (4)	0.0245902	0	0	0	0	0	0	0	0	0.0833333	0	0	0	0	0	0	0	0.012903225806451613	0	0.0136986	0	0.0333333	0	0	0.012779552715654952	0.00840336	0	0.022222222222222223	0	0.013513513513513514	0.022222222222222223	0	0	0.019230769230769232	0.017543859649122806	0.011764705882352941	0.043478260869565216	0	0	0	0.125	0	0	0	0	0	0	0.013289036544850499	0.3333333333333333
Induction Conditions - Wnt3a (3)	0	0	0	0	0	0	0	0	0	0	0	0	0	0	0	0	0	0.00967742	1	0.013761467889908258	0	0	0	0	0.00958466	0.0258621	0	0.0714286	0	0.0422535	0.0714286	0	0	0	0.013157894736842105	0	0	0	0.25	0	0	0	0	0.012345679012345678	0.011363636363636364	0	0	0.00996678	0
Induction Duration - 1 days (99)	0.22905027932960895	0	0.16216216216216217	0.0442478	0.00877193	0.15	0.0891089	0.00925926	0.0380952	0.00934579	0.00943396	0.0190476	0.0392157	0	0.0196078	0.00980392	0.00980392	0.31511254019292606	0.00990099	0.2834008097165992	0.11194029850746269	0.0677966	0.018691588785046728	0.038834951456310676	0.31629392971246006	0.34375	0.3697478991596639	0.0522388	0.0380952	0.25	0.128	0.16216216216216217	0.010101010101010102	0.4460431654676259	0.39148936170212767	0.16025641025641027	0.0720721	0.017543859649122806	0.00909091	0.018691588785046728	0.00970874	0.029703	0	0.3612565445026178	0.1144578313253012	0.0540541	0.018018018018018018	0.3201320132013201	0
Induction Duration - Reported (230)	0.404	0.014705882352941176	0.13043478260869565	0.0732759	0.012345679012345678	0.0695652	0.0478261	0.043478260869565216	0.034482758620689655	0.0391304	0.012766	0.034782608695652174	0.030434782608695653	0.026087	0.021739130434782608	0.017391304347826087	0.012987012987012988	0.7307692307692307	0.013043478260869565	0.4983277591973244	0.16182572614107885	0.10775862068965517	0.043478260869565216	0.030303030303030304	0.7348242811501597	0.459916	0.2727272727272727	0.1574468085106383	0.038961	0.2918454935622318	0.16738197424892703	0.13043478260869565	0.00434783	0.4067796610169492	0.854251	0.3333333333333333	0.0775862	0.0646552	0.047619047619047616	0.038961	0.017316017316017316	0.017316017316017316	0	0.5959183673469388	0.1366906474820144	0.0598291	0.0608696	0.740984	0.0386266
Induction Duration - 2 days (71)	0.23870967741935484	0.017391304347826087	0.0978261	0.0714286	0.011627906976744186	0	0.012345679012345678	0.0253165	0.038461538461538464	0.012658227848101266	0.0128205	0.039473684210526314	0.0263158	0.013157894736842105	0.027027	0.041666666666666664	0.0273973	0.22508038585209003	0	0.1606425702811245	0.12037037037037036	0.12643678160919541	0.0657895	0.025974025974025976	0.2268370607028754	0.16149068322981366	0.11570247933884298	0.10784313725490197	0.0125	0.109375	0.056074766355140186	0.0978261	0	0.10191082802547771	0.2832618025751073	0.3783783783783784	0.0224719	0.0352941	0.012195121951219513	0.0519481	0	0.013333333333333334	0	0.281768	0.0680272	0.022988505747126436	0.024096385542168676	0.23588039867109634	0.0375
Induction Duration - 3 days (37)	0.0972222	0.024691358024691357	0.046875	0.0980392	0.019230769230769232	0.019230769230769232	0.0212766	0.021739130434782608	0.021739130434782608	0.022222222222222223	0.022727272727272728	0.0714286	0.023255813953488372	0.13157894736842105	0.024390243902439025	0	0	0.11935483870967742	0	0.0897436	0.10126582278481013	0.0666667	0.0681818	0.022727272727272728	0.1182108626198083	0.1417910447761194	0.052083333333333336	0.14492753623188406	0.0930233	0.125	0.12857142857142856	0.046875	0	0.0859375	0.13733905579399142	0.0917431	0.0363636	0.22727272727272727	0.0652174	0.021739130434782608	0.024390243902439025	0	0	0.10614525139664804	0.0603448	0.0377358	0.0851064	0.11551155115511551	0.0425532
Induction Duration - 4 days (15)	0.046153846153846156	0	0	0	0	0	0	0.19047619047619047	0	0.3333333333333333	0	0	0	0	0	0	0	0.0483871	0	0.0590909	0.015625	0.024390243902439025	0	0	0.0479233	0.048	0	0.11764705882352941	0	0.075	0.11764705882352941	0	0	0.044642857142857144	0.0565217	0.010416666666666666	0.16666666666666666	0	0.08	0.041666666666666664	0.0526316	0	0	0	0.01	0.13793103448275862	0.2608695652173913	0.0498339	0.17391304347826086
Induction Duration - 5 days (8)	0.023809523809523808	0	0	0.038461538461538464	0	0	0	0.125	0	0	0	0	0	0	0	0	0	0.025806451612903226	0.2222222222222222	0.0226244	0.0357143	0.029411764705882353	0	0	0.025559105431309903	0.024793388429752067	0	0.0638298	0	0.025974025974025976	0.041666666666666664	0	0	0.018518518518518517	0.0350877	0	0.037037037037037035	0	0.25	0.058823529411764705	0.0833333	0	0	0.043209876543209874	0.010752688172043012	0	0	0.026578073089700997	0
Wnt Inhibitor - IWP (110)	0.22872340425531915	0.00645161	0.16666666666666666	0.0487805	0	0.0956522	0.0803571	0.0526316	0.061946902654867256	0.017094017094017096	0.00854701	0.00854701	0.044642857142857144	0	0.026785714285714284	0.017857142857142856	0.0363636	0.3548387096774194	0	0.2713178294573643	0.14285714285714285	0.10483870967741936	0.034482758620689655	0.026087	0.3514376996805112	0.3614457831325301	0.3488372093023256	0.0780142	0.034482758620689655	0.2569444444444444	0.14285714285714285	0.16666666666666666	0	0.358974	0.4444444444444444	0.23076923076923078	0.1016949152542373	0.032520325203252036	0.025210084033613446	0.034482758620689655	0.00877193	0.045454545454545456	0.00909091	0.40414507772020725	0.10112359550561797	0.0491803	0.024793388429752067	0.3564356435643564	0.00826446
Wnt Inhibitor - Reported (227)	0.4089068825910931	0.0148699	0.12719298245614036	0.0742358	0.0125	0.0704846	0.048458149779735685	0.0440529	0.039473684210526314	0.0350877	0.012931	0.0352423	0.021834061135371178	0.0264317	0.022026431718061675	0.013157894736842105	0.0176211	0.7211538461538461	0.00877193	0.49328859060402686	0.16877637130801687	0.10434782608695652	0.039473684210526314	0.0307018	0.7252396166134185	0.4533898305084746	0.27074235807860264	0.15948275862068967	0.034934497816593885	0.28448275862068967	0.1645021645021645	0.12719298245614036	0.00440529	0.4	0.8495934959349594	0.3261802575107296	0.0786026	0.0701754	0.0482456	0.039473684210526314	0.017543859649122806	0.022026431718061675	0.00440529	0.6371308016877637	0.1299638989169675	0.0652174	0.0570175	0.7311475409836066	0.012711864406779662
Wnt Inhibitor - IWR (54)	0.19863013698630136	0	0.012048192771084338	0.057971014492753624	0.029411764705882353	0.09375	0.015625	0.0666667	0	0.0862069	0.0163934	0.0508475	0	0.0169492	0.017241379310344827	0	0	0.17419354838709677	0	0.14285714285714285	0.0947368	0.08	0.0322581	0.0508475	0.17252396166134185	0.13333333333333333	0.0825688	0.11627906976744186	0.015873015873015872	0.0775862	0.0909091	0.012048192771084338	0	0.16417910447761194	0.21551724137931033	0.1623931623931624	0.0882353	0.014285714285714285	0.03125	0.0491803	0.0535714	0	0	0.17486338797814208	0.0769231	0.0909091	0.13333333333333333	0.17940199335548174	0.015384615384615385
Wnt Inhibitor - Wnt-C59 (28)	0.0875912	0.0136986	0.0740741	0.044444444444444446	0	0	0.0263158	0	0.0555556	0	0	0.125	0	0	0.03125	0.0322581	0	0.0903226	0	0.0837004	0.04	0.018518518518518517	0.0857143	0.058823529411764705	0.0894569	0.0827068	0.0823529	0.0606061	0	0.0645161	0.014492753623188406	0.0740741	0.0357143	0.0833333	0.11304347826086956	0.1702127659574468	0	0.022727272727272728	0.025641	0	0	0	0	0.125	0.045871559633027525	0.045454545454545456	0	0.0930233	0
Wnt Inhibitor - XAV939 (23)	0.0746269	0.014705882352941176	0.06	0.16666666666666666	0	0	0	0.0645161	0	0	0	0	0	0	0.037037037037037035	0	0	0.0673077	0	0.0570175	0.12307692307692308	0.0204082	0.03125	0	0.0734824	0.0859375	0.023529411764705882	0.1206896551724138	0.0645161	0.0681818	0.0483871	0.06	0	0.041666666666666664	0.0913043	0.0714286	0.023809523809523808	0.0526316	0.12903225806451613	0.0645161	0.037037037037037035	0	0	0.0823529	0.018691588785046728	0	0.0571429	0.076412	0.029411764705882353
Wnt Inhibitor - DS-I-7 (11)	0.03125	0.017857142857142856	0	0	0.038461538461538464	0	0	0	0	0	0.0555556	0	0	0.3076923076923077	0	0	0	0.035483870967741936	0.0769231	0.0315315	0.016666666666666666	0.0857143	0	0	0.0351438	0.040983606557377046	0	0.0816327	0.05	0.0649351	0.10416666666666667	0	0	0.00892857	0.0391304	0	0	0.2727272727272727	0.0952381	0	0	0	0	0.0552147	0.010416666666666666	0	0	0.036544850498338874	0.045454545454545456
Wnt Inhibitor - Others (9)	0.0483871	0	0	0.037037037037037035	0	0	0	0	0	0	0	0	0	0.0714286	0	0	0	0.0257235	0	0.031818181818181815	0.017241379310344827	0.0285714	0	0	0.028754	0.0245902	0	0.0625	0	0.025641	0.0408163	0	0	0.037383177570093455	0.034934497816593885	0	0.0740741	0.0833333	0	0.0555556	0	0	0	0.011904761904761904	0.010638297872340425	0.08	0.0952381	0.0231023	0
Wnt Inhibitor - bFGF (8)	0.0487805	0	0.027027	0	0	0	0	0	0	0	0	0	0	0	0	0	0	0.025806451612903226	0.1	0.013452914798206279	0.017543859649122806	0.029411764705882353	0.2	0	0.025559105431309903	0.0163934	0	0.0204082	0.058823529411764705	0.025974025974025976	0.041666666666666664	0.027027	0	0.0377358	0.0305677	0.011235955056179775	0	0	0.0526316	0.058823529411764705	0	0	0	0.024242424242424242	0	0.0833333	0.047619047619047616	0.026578073089700997	0
Wnt Inhibitor - KY02111 (7)	0.024	0.019230769230769232	0	0.04	0	0	0	0.0625	0	0.0666667	0	0	0	0	0	0	0	0.016025641025641024	0	0.0180995	0.0555556	0	0	0	0.022364217252396165	0.0165289	0	0.0425532	0	0.012987012987012988	0.020833333333333332	0	0	0.00925926	0.021739130434782608	0.0348837	0	0	0	0.0625	0	0	0	0.0181818	0	0	0.05	0.023255813953488372	0
Wnt Inhibitor - BMP4 (7)	0.0406504	0	0.027777777777777776	0	0	0	0	0	0	0	0	0	0	0	0	0	0	0.0225806	0.1111111111111111	0.0180995	0.017857142857142856	0.030303030303030304	0.0625	0	0.022364217252396165	0.0165289	0	0.020833333333333332	0.0625	0.0263158	0.0425532	0.027777777777777776	0	0.018691588785046728	0.026200873362445413	0.022988505747126436	0	0	0.0555556	0.0625	0	0	0	0.024390243902439025	0	0.041666666666666664	0.05	0.023255813953488372	0
Wnt Inhibitor - VEGF (3)	0.0163934	0	0.03125	0	0	0	0	0	0	0	0	0	0	0	0	0	0	0.00967742	0	0.00913242	0	0.034482758620689655	0	0	0.00958466	0.017094017094017096	0.015151515151515152	0.022727272727272728	0	0.027777777777777776	0.022727272727272728	0.03125	0	0.00961538	0.00873362	0	0.045454545454545456	0	0	0	0	0	0	0	0.011363636363636364	0.05	0.0625	0.00996678	0
Wnt Inhibition Duration - 2 days (152)	0.2938388625592417	0	0.1592356687898089	0.0754717	0.012048192771084338	0.0632911	0.0653595	0.0451613	0.038461538461538464	0.045454545454545456	0.00628931	0.038961	0.0392157	0	0.026143790849673203	0.0263158	0.012987012987012988	0.4855305466237942	0.00649351	0.3857677902621723	0.14124293785310735	0.0914634	0.038461538461538464	0.0191083	0.48562300319488816	0.4031413612565445	0.3170731707317073	0.11494252873563218	0.0318471	0.28160919540229884	0.14792899408284024	0.1592356687898089	0	0.372973	0.6101694915254238	0.32954545454545453	0.081761	0.024242424242424242	0.025	0.0318471	0.0194805	0.0194805	0	0.5194174757281553	0.10697674418604651	0.055900621118012424	0.0375	0.5	0.044585987261146494
Wnt Inhibition Duration - Reported (222)	0.3943089430894309	0.015151515151515152	0.13004484304932734	0.0711111	0.012766	0.0720721	0.0495495	0.045045	0.0265487	0.0405405	0.013215859030837005	0.036036036036036036	0.0315315	0.027027	0.0225225	0.018018018018018018	0.013452914798206279	0.7051282051282052	0.00896861	0.4864864864864865	0.1574468085106383	0.11160714285714286	0.0403587	0.0313901	0.7092651757188498	0.46320346320346323	0.2825112107623318	0.15789473684210525	0.0357143	0.2907488986784141	0.168142	0.13004484304932734	0.0045045	0.4025974025974026	0.8367346938775511	0.34513274336283184	0.0755556	0.0622222	0.044642857142857144	0.0403587	0.017937219730941704	0.017937219730941704	0	0.5958333333333333	0.1282051282051282	0.061946902654867256	0.058296	0.7203947368421053	0.04
Wnt Inhibition Duration - 4 days (19)	0.0606061	0.015625	0.020833333333333332	0	0	0.029411764705882353	0	0.0740741	0	0.037037037037037035	0	0.08	0	0.041666666666666664	0	0	0	0.0578778	0.047619047619047616	0.048672566371681415	0.045454545454545456	0.045454545454545456	0.0357143	0.08	0.0607029	0.0546875	0.012195121951219513	0.0892857	0.0357143	0.046511627906976744	0.0701754	0.020833333333333332	0	0.0431034	0.0692641	0.0744681	0.0263158	0.0285714	0.10714285714285714	0.0357143	0	0	0	0.046511627906976744	0.029411764705882353	0.0571429	0.1	0.056105610561056105	0
Wnt Inhibition Duration - 3 days (17)	0.078125	0.016129032258064516	0.021739130434782608	0.0285714	0	0.03125	0	0	0	0	0	0	0	0.045454545454545456	0.047619047619047616	0	0.05	0.054838709677419356	0	0.053811659192825115	0.0307692	0.023255813953488372	0.038461538461538464	0.041666666666666664	0.054313099041533544	0.047244094488188976	0.0253165	0.0535714	0.038461538461538464	0.047619047619047616	0.0535714	0.021739130434782608	0	0.0625	0.0745614	0.076087	0.0571429	0.030303030303030304	0	0.038461538461538464	0.047619047619047616	0	0	0.047058823529411764	0.019801980198019802	0.029411764705882353	0.10714285714285714	0.0564784	0
Wnt Inhibition Duration - 1 day (12)	0.0555556	0	0.024390243902439025	0.0689655	0	0	0.045454545454545456	0	0	0	0.0526316	0	0	0.058823529411764705	0	0	0	0.0387097	0	0.022222222222222223	0.0508475	0.11428571428571428	0	0	0.038338658146964855	0.0578512	0.0410959	0.08	0	0.0506329	0.038461538461538464	0.024390243902439025	0.0833333	0.0555556	0.048034934497816595	0.032967	0	0.0740741	0	0.047619047619047616	0	0	0	0.023668639053254437	0.053763440860215055	0.0714286	0	0.0398671	0
Wnt Inhibition Duration - >6 days (12)	0.0390625	0.017543859649122806	0.024390243902439025	0	0.037037037037037035	0.037037037037037035	0	0	0	0	0.0526316	0	0.0555556	0.2	0	0	0	0.0387097	0	0.026785714285714284	0.0333333	0.0833333	0	0.0526316	0.038338658146964855	0.0406504	0.027027	0.038461538461538464	0.047619047619047616	0.0506329	0.058823529411764705	0.024390243902439025	0	0.00884956	0.043478260869565216	0.010752688172043012	0.0322581	0.2608695652173913	0.14285714285714285	0.047619047619047616	0	0.0625	0	0.054878048780487805	0.020833333333333332	0	0	0.0398671	0.043478260869565216
Wnt Inhibition Duration - 5 days (6)	0.032520325203252036	0	0	0	0	0.1	0	0	0	0	0	0	0	0	0	0	0	0.0193548	0	0.0228311	0	0	0.0666667	0	0.019169329073482427	0.016666666666666666	0.029411764705882353	0	0	0	0	0	0	0.0285714	0.021834061135371178	0.023255813953488372	0	0	0	0	0	0	0	0.030864197530864196	0	0	0.0526316	0.019933554817275746	0.058823529411764705
Wnt Inhibition Duration - 6 days (4)	0.00806452	0.0204082	0	0.045454545454545456	0	0.0526316	0	0.0769231	0	0.0833333	0	0	0	0	0	0	0	0.012903225806451613	0	0.00909091	0.038461538461538464	0	0	0	0.012779552715654952	0.025641	0.014925373134328358	0.045454545454545456	0	0.013513513513513514	0.022222222222222223	0	0	0.019230769230769232	0.00869565	0	0	0	0	0	0	0	0	0.012269938650306749	0	0	0	0.013289036544850499	0
Insulin Addition - Induction (172)	0.30973451327433627	0.00913242	0.15819209039548024	0.0777778	0.010582010582010581	0.0852273	0.0628571	0.010929	0.0511364	0.00546448	0.016666666666666666	0.045714285714285714	0.0340909	0.0342857	0.0169492	0.017045454545454544	0.022857142857142857	0.5544871794871795	0.011363636363636364	0.39361702127659576	0.14795918367346939	0.12222222222222222	0.0451977	0.028089887640449437	0.5591054313099042	0.4405940594059406	0.3277777777777778	0.11282051282051282	0.0451977	0.26804123711340205	0.13612565445026178	0.15819209039548024	0	0.39899	0.700422	0.3316062176165803	0.059782608695652176	0.0607735	0.0446927	0.027777777777777776	0.011235955056179775	0.0285714	0.00571429	0.6153846153846154	0.13478260869565217	0.021164021164021163	0.0106952	0.5761589403973509	0.0446927
Insulin Addition - prior Day 8 (149)	0.27358490566037735	0.010362694300518135	0.13291139240506328	0.0909091	0.012269938650306749	0.1	0.038961	0.012738853503184714	0.046052631578947366	0.00636943	0.0194805	0.0466667	0.033112582781456956	0.040268456375838924	0.019867549668874173	0.02	0.026845637583892617	0.47115384615384615	0.013333333333333334	0.3592592592592593	0.12429378531073447	0.11392405063291139	0.052980132450331126	0.026143790849673203	0.476038	0.387435	0.2603550295857988	0.1301775147928994	0.052980132450331126	0.22905027932960895	0.12352941176470589	0.13291139240506328	0	0.3641304347826087	0.597458	0.2905027932960894	0.0696203	0.0709677	0.045454545454545456	0.019230769230769232	0.013157894736842105	0.033557	0	0.55	0.11904761904761904	0.018292682926829267	0.00617284	0.4900662251655629	0.0522876
Insulin Addition - after Day 7 (26)	0.0888889	0	0.14285714285714285	0	0	0	0.15625	0	0.058823529411764705	0	0	0.030303030303030304	0.03125	0	0	0	0	0.083871	0	0.0608696	0.10144927536231885	0.0816327	0	0.030303030303030304	0.0830671	0.11811023622047244	0.2	0	0	0.12790697674418605	0.0793651	0.14285714285714285	0	0.10344827586206896	0.1091703056768559	0.125	0	0	0.027027	0.058823529411764705	0	0	0.038461538461538464	0.10650887573964497	0.0566038	0.023255813953488372	0.025641	0.0863787	0
Insulin Addition - Reported (175)	0.30973451327433627	0.00913242	0.15819209039548024	0.0777778	0.010582010582010581	0.0852273	0.0628571	0.010929	0.0511364	0.00546448	0.016666666666666666	0.045714285714285714	0.0340909	0.0342857	0.0169492	0.017045454545454544	0.022857142857142857	0.5544871794871795	0.011363636363636364	0.39361702127659576	0.14795918367346939	0.12222222222222222	0.0451977	0.028089887640449437	0.5591054313099042	0.4405940594059406	0.3277777777777778	0.11282051282051282	0.0451977	0.26804123711340205	0.13612565445026178	0.15819209039548024	0	0.39899	0.700422	0.3316062176165803	0.059782608695652176	0.0607735	0.0446927	0.027777777777777776	0.011235955056179775	0.0285714	0.00571429	0.6153846153846154	0.13478260869565217	0.021164021164021163	0.0106952	0.5761589403973509	0.0446927
Purification Stategy - Reported (101)	0.2265193370165746	0.027972027972027972	0.14912280701754385	0.00840336	0.0263158	0.044642857142857144	0.0769231	0.00909091	0.0571429	0.0377358	0.00925926	0.0480769	0.0485437	0.00943396	0.00952381	0.019417475728155338	0.00961538	0.3173076923076923	0	0.25098039215686274	0.12686567164179105	0.12280701754385964	0.027777777777777776	0.018691588785046728	0.3184713375796178	0.2616279069767442	0.27906976744186046	0.0671642	0	0.2198581560283688	0.117188	0.14912280701754385	0	0.16666666666666666	0.3651452282157676	0.32608695652173914	0.0707965	0.0535714	0.0272727	0.027777777777777776	0.0392157	0.0291262	0	0.37894736842105264	0.1	0.043859649122807015	0.00877193	0.32673267326732675	0.0366972
Purification Stategy - Glucose & Lactate (85)	0.1907514450867052	0.015503875968992248	0.17346938775510204	0.00970874	0.01	0.052083333333333336	0.0909091	0	0.0674157	0.010752688172043012	0	0.056818181818181816	0.0574713	0	0.011235955056179775	0.022988505747126436	0.011363636363636364	0.266026	0	0.21686746987951808	0.1440677966101695	0.0980392	0.010638297872340425	0.021978	0.267516	0.25625	0.3185840707964602	0.040983606557377046	0	0.20930232558139536	0.0948276	0.17346938775510204	0	0.16875	0.3206751054852321	0.35772357723577236	0.05	0.02	0.010416666666666666	0.021505376344086023	0.022727272727272728	0.034482758620689655	0	0.35911602209944754	0.0961538	0.019801980198019802	0	0.2781456953642384	0.043010752688172046
Purification Stategy - Cell Sorting (7)	0.0322581	0	0	0	0.045454545454545456	0	0	0.0625	0	0.0666667	0	0	0	0	0	0	0	0.0225806	0	0.0180995	0	0.030303030303030304	0.13333333333333333	0	0.022364217252396165	0.00819672	0	0.020833333333333332	0	0.012987012987012988	0.020833333333333332	0	0	0.018691588785046728	0.021739130434782608	0.011363636363636364	0	0	0.11764705882352941	0.0625	0	0	0	0.012048192771084338	0.010869565217391304	0.041666666666666664	0.05	0.023255813953488372	0
Purification Stategy - Media (6)	0.032520325203252036	0.0196078	0	0	0.047619047619047616	0	0	0	0	0	0.0769231	0	0	0.0909091	0	0	0	0.0193548	0	0.013574660633484163	0	0.1	0	0	0.019169329073482427	0.00826446	0	0.0212766	0	0.013157894736842105	0.0212766	0	0	0	0.021834061135371178	0	0.04	0.21052631578947367	0	0	0.1	0	0	0.030864197530864196	0	0	0	0.016556291390728478	0
Purification Stategy - Antibiotic (3)	0	0.020833333333333332	0	0	0	0	0	0	0	0.2	0	0	0	0	0	0	0	0.00967742	0	0.013761467889908258	0	0	0	0	0.00958466	0.017094017094017096	0	0.046511627906976744	0	0.027777777777777776	0.046511627906976744	0	0	0	0.00873362	0	0.0952381	0	0	0	0.14285714285714285	0	0	0	0.011363636363636364	0.10526315789473684	0	0.00996678	0
Purification Duration - Reported (88)	0.20809248554913296	0.022900763358778626	0.16831683168316833	0.00943396	0.0196078	0.050505050505050504	0.0879121	0	0.053763440860215055	0.010416666666666666	0.010526315789473684	0.054945054945054944	0.0555556	0.010752688172043012	0.010869565217391304	0.010989	0.010989	0.27564102564102566	0	0.224	0.14049586776859505	0.11650485436893204	0.010309278350515464	0.010526315789473684	0.2770700636942675	0.25153374233128833	0.29914529914529914	0.0483871	0	0.20454545454545456	0.092437	0.16831683168316833	0	0.15151515151515152	0.32217573221757323	0.33858267716535434	0.058823529411764705	0.05	0.010101010101010102	0.020833333333333332	0.0333333	0.0333333	0	0.36813186813186816	0.0943396	0.019230769230769232	0	0.28807947019867547	0.041666666666666664
Purification Duration - 4 days (28)	0.0642857	0	0.20833333333333334	0.021739130434782608	0	0.023255813953488372	0.14705882352941177	0	0.0857143	0	0	0	0.029411764705882353	0	0	0	0	0.0868167	0	0.0837004	0.0833333	0.0377358	0	0.0285714	0.0894569	0.13385826771653545	0.21052631578947367	0.014492753623188406	0	0.16470588235294117	0.0769231	0.20833333333333334	0	0.1016949152542373	0.10822510822510822	0.13402061855670103	0.043478260869565216	0	0.025641	0.027027	0.03125	0.03125	0	0.13855421686746988	0.045871559633027525	0	0	0.0930233	0.025641
Purification Duration - <3 days (17)	0.0615385	0.0327869	0.0681818	0	0	0	0.12	0	0	0	0	0.041666666666666664	0.043478260869565216	0	0.047619047619047616	0	0	0.054838709677419356	0	0.0585586	0.015151515151515152	0.047619047619047616	0.038461538461538464	0	0.054313099041533544	0.0555556	0.0945946	0	0	0.0731707	0.0535714	0.0681818	0	0.0530973	0.069869	0.1	0.027777777777777776	0	0	0.038461538461538464	0.047619047619047616	0	0	0.0658683	0.040404	0	0	0.0564784	0.0357143
Purification Duration - 3 days (12)	0.0390625	0	0.024390243902439025	0	0.037037037037037035	0	0	0	0.1	0	0.0526316	0.1111111111111111	0	0.058823529411764705	0	0	0	0.0387097	0	0.022222222222222223	0.0508475	0.11428571428571428	0	0	0.038338658146964855	0.024	0.027027	0.018867924528301886	0	0.0375	0.038461538461538464	0.024390243902439025	0	0.00884956	0.048034934497816595	0.0804598	0	0.11538461538461539	0	0	0	0	0	0.0745342	0	0.034482758620689655	0	0.0398671	0
Purification Duration - 6 days (10)	0.0396825	0	0.025641	0	0	0	0	0	0	0	0	0	0.13333333333333333	0	0	0	0.0769231	0.028938906752411574	0	0.027027	0.034482758620689655	0.027777777777777776	0	0	0.028662420382165606	0.024390243902439025	0.0422535	0	0	0.0125	0	0.025641	0	0.027522935779816515	0.034782608695652174	0.0574713	0	0	0	0	0	0	0	0.030120481927710843	0.043478260869565216	0	0	0.0332226	0.047619047619047616
Purification Duration - 5 days (6)	0.040983606557377046	0	0	0	0	0	0	0	0	0	0	0	0	0	0	0.1111111111111111	0	0.0193548	0	0.013574660633484163	0.0181818	0.0645161	0	0	0.019169329073482427	0.00826446	0	0.0212766	0	0	0	0	0	0.00934579	0.021834061135371178	0.0352941	0	0.045454545454545456	0	0	0	0	0	0.037267080745341616	0	0	0	0.019933554817275746	0
Purification Duration - 7 days (6)	0.00793651	0	0.0285714	0	0	0.1	0	0	0	0	0	0.16666666666666666	0	0	0	0	0	0.0193548	0	0.013574660633484163	0.0566038	0	0	0	0.019169329073482427	0.042735042735042736	0.0447761	0.043478260869565216	0	0.013157894736842105	0	0.0285714	0	0.00934579	0.0263158	0.0352941	0.0833333	0	0	0	0	0.2222222222222222	0	0.024539877300613498	0.022222222222222223	0	0	0.019933554817275746	0
Purification Duration - >9 days (5)	0.016129032258064516	0.02	0	0	0.05	0.10526315789473684	0	0	0	0	0	0	0	0	0	0	0	0.016129032258064516	0	0.0182648	0	0.0322581	0	0	0.0159744	0.0168067	0.029850746268656716	0	0	0	0	0	0	0.00943396	0.013043478260869565	0.011627906976744186	0	0.047619047619047616	0	0	0	0	0	0.024691358024691357	0	0.045454545454545456	0	0.016611295681063124	0
Purification Duration - 8 days (4)	0.00806452	0	0.030303030303030304	0	0	0	0	0	0	0.0833333	0	0	0.1	0	0	0	0	0.012903225806451613	0	0.0136986	0.018867924528301886	0	0	0	0.012779552715654952	0.025641	0.030303030303030304	0.022222222222222223	0	0.0273973	0.022222222222222223	0.030303030303030304	0	0	0.013100436681222707	0.023809523809523808	0.043478260869565216	0	0	0	0.125	0	0	0.012269938650306749	0	0	0	0.00993377	0.0666667
Differentiation Purity Assessment - Reported (167)	0.3031674208144796	0.014285714285714285	0.13218390804597702	0.0877193	0.016666666666666666	0.0828402	0.017142857142857144	0.047337278106508875	0.0535714	0.023255813953488372	0.00574713	0.0479042	0.029585798816568046	0.0176471	0.029940119760479042	0.017857142857142856	0.023952095808383235	0.5239616613418531	0.011904761904761904	0.34146341463414637	0.1793478260869565	0.12138728323699421	0.0535714	0.029411764705882353	0.5286624203821656	0.3671497584541063	0.2094240837696335	0.14835164835164835	0.0535714	0.2268041237113402	0.11764705882352941	0.13218390804597702	0	0.3121951219512195	0.6322314049586777	0.28350515463917525	0.1	0.0574713	0.0591716	0.047337278106508875	0.023809523809523808	0.029940119760479042	0	0.5045871559633027	0.1145374449339207	0.0693642	0.0647059	0.5445544554455446	0.028735632183908046
Differentiation Purity Assessment - Flow Cytometry cTnT+ (134)	0.25	0.011235955056179775	0.1388888888888889	0.10071942446043165	0.013513513513513514	0.0791367	0.00694444	0.051094890510948905	0.058823529411764705	0.028777	0.0070922	0.0441176	0.029197080291970802	0.021897810218978103	0.0296296	0.014705882352941176	0.029850746268656716	0.4230769230769231	0.00735294	0.2753623188405797	0.17197452229299362	0.15	0.043478260869565216	0.0215827	0.42356687898089174	0.32275132275132273	0.18562874251497005	0.14285714285714285	0.058823529411764705	0.21301775147928995	0.1	0.1388888888888889	0	0.2826086956521739	0.5146443514644351	0.24855491329479767	0.1	0.070922	0.057971014492753624	0.0285714	0.0296296	0.014598540145985401	0	0.4824120603015075	0.0837438	0.0555556	0.0724638	0.43564356435643564	0.020979
Differentiation Purity Assessment - Specialised (10)	0.056451612903225805	0	0	0.0357143	0	0.04	0.05	0	0	0	0	0	0	0	0.0714286	0	0	0.0322581	0	0.0363636	0.0169492	0	0.0526316	0	0.0319489	0.024390243902439025	0.0136986	0.0196078	0.0526316	0.0253165	0.04	0	0	0.037037037037037035	0.0258621	0.022222222222222223	0.034482758620689655	0	0	0.0526316	0	0	0	0.030120481927710843	0.0322581	0	0	0.0332226	0.047619047619047616
Differentiation Purity Assessment - Flow Cytometry a-actinin+ (9)	0.00775194	0	0	0.037037037037037035	0	0	0	0	0.0555556	0	0	0.21428571428571427	0.0666667	0.0714286	0.0769231	0	0.0833333	0.0290323	0	0.0225225	0.0727273	0	0	0	0.028754	0.041666666666666664	0.013888888888888888	0.0851064	0	0.012658227848101266	0.02	0	0	0.037383177570093455	0.039473684210526314	0.0581395	0	0	0.10526315789473684	0.0555556	0	0	0	0.030303030303030304	0.0326087	0.038461538461538464	0	0.029900332225913623	0
Differentiation Purity Assessment - IHC a-actinin (8)	0.032	0.018867924528301886	0.027027	0.038461538461538464	0	0.043478260869565216	0	0	0	0	0	0.0666667	0	0	0	0	0	0.022508038585209004	0	0.0226244	0.0357143	0	0	0.0666667	0.025559105431309903	0.024793388429752067	0.014084507042253521	0.041666666666666664	0	0.0128205	0	0.027027	0	0.018518518518518517	0.026087	0.022727272727272728	0.037037037037037035	0	0	0.058823529411764705	0	0.0833333	0	0.0304878	0.010752688172043012	0.04	0.047619047619047616	0.026578073089700997	0
Differentiation Purity Assessment - IHC cTnT (7)	0.0491803	0	0	0	0	0	0	0.0625	0	0	0	0	0	0	0	0	0	0.0225806	0	0.0273973	0.017857142857142856	0	0	0	0.022364217252396165	0.00819672	0	0.020833333333333332	0	0.012987012987012988	0.020833333333333332	0	0	0.00925926	0.021739130434782608	0.022988505747126436	0	0	0	0.13333333333333333	0	0	0	0.0181818	0.021978	0.041666666666666664	0	0.023255813953488372	0
Differentiation Purity Assessment - Flow Cytometry SIRPA+ (4)	0.016260162601626018	0	0.030303030303030304	0	0	0.0526316	0	0	0	0	0	0	0	0	0	0	0	0.012903225806451613	0	0.00452489	0.018867924528301886	0	0.16666666666666666	0	0.012779552715654952	0.0169492	0.030303030303030304	0	0	0.013513513513513514	0	0.030303030303030304	0	0.0291262	0.017543859649122806	0.011764705882352941	0	0	0	0	0	0	0	0.018518518518518517	0	0.047619047619047616	0	0.013289036544850499	0
Differentiation Purity Assessment - Flow Cytometry VCAM1+ (4)	0.016260162601626018	0	0	0	0	0.0526316	0	0	0	0	0	0	0	0	0	0	0	0.012903225806451613	0.16666666666666666	0.0183486	0	0	0	0	0.012779552715654952	0.0169492	0.014925373134328358	0.022222222222222223	0	0.013513513513513514	0.022222222222222223	0	0	0.019230769230769232	0.017543859649122806	0.011764705882352941	0	0	0.0666667	0	0	0	0	0.012269938650306749	0.011235955056179775	0	0	0.013289036544850499	0
Differentiation Purity Assessment - Visual Inspection (4)	0	0	0	0	0.0526316	0.1111111111111111	0.0714286	0	0	0	0	0	0	0	0	0.14285714285714285	0	0.012903225806451613	0	0.0136986	0	0	0	0.0909091	0.012779552715654952	0.025641	0.046153846153846156	0	0	0.013513513513513514	0.022222222222222223	0	0	0.00952381	0.017543859649122806	0.011764705882352941	0.0909091	0	0	0	0	0.2857142857142857	0	0.018518518518518517	0	0	0	0.013289036544850499	0.0666667
Differentiation Purity Assessment - Flow Cytometry cTnI+ (3)	0.0163934	0	0.03125	0	0	0	0	0	0	0	0	0	0	0	0	0	0	0.00967742	0	0.00913242	0	0	0.0833333	0	0.00958466	0.0258621	0.0307692	0	0.0833333	0.027777777777777776	0.046511627906976744	0.03125	0	0.019417475728155338	0.013157894736842105	0.011904761904761904	0	0	0	0	0	0	0	0	0.022988505747126436	0	0	0.00996678	0
Differentiation Purity % - Reported (153)	0.26851851851851855	0.020512820512820513	0.13664596273291926	0.0955414	0.011976047904191617	0.0903226	0.012345679012345678	0.0516129	0.0516129	0.0253165	0.00625	0.0387097	0.0322581	0.019230769230769232	0.032679738562091505	0.0194805	0.026143790849673203	0.4792332268370607	0.00645161	0.3202846975088968	0.16	0.1320754716981132	0.0584416	0.025477707006369428	0.4840764331210191	0.35858585858585856	0.2122905027932961	0.14035087719298245	0.0584416	0.21739130434782608	0.10795454545454546	0.13664596273291926	0	0.32124352331606215	0.5743801652892562	0.25668449197860965	0.0949367	0.055900621118012424	0.050955414012738856	0.0382166	0.025974025974025976	0.032679738562091505	0	0.4811320754716981	0.10648148148148148	0.0754717	0.056962025316455694	0.49834983498349833	0.03125
Differentiation Purity % - 90 to 94 (37)	0.11267605633802817	0.012195121951219513	0.046875	0.0566038	0.019230769230769232	0.0392157	0.043478260869565216	0.044444444444444446	0.044444444444444446	0	0	0.022727272727272728	0.023255813953488372	0	0.024390243902439025	0	0.025	0.1157556270096463	0	0.0991379	0.0875	0.10344827586206896	0.021739130434782608	0	0.1182108626198083	0.10869565217391304	0.0978261	0.0675676	0.021739130434782608	0.058823529411764705	0.0533333	0.046875	0	0.112	0.1471861471861472	0.1553398058252427	0	0.038461538461538464	0.0425532	0.0681818	0	0	0	0.14450867052023122	0.0512821	0.0784314	0.0408163	0.12292358803986711	0
Differentiation Purity % - 95 to 100 (35)	0.10638297872340426	0.0253165	0.0833333	0.018867924528301886	0	0.0851064	0	0.046511627906976744	0	0.0731707	0	0.0487805	0.024390243902439025	0	0.025641	0.0263158	0	0.10932475884244373	0	0.0765957	0.0759494	0.10714285714285714	0.0714286	0.023809523809523808	0.10828025477707007	0.11029411764705882	0.1	0.084507	0	0.0927835	0.0547945	0.0833333	0	0.10483870967741936	0.12875536480686695	0.0540541	0.1956521739130435	0.04	0.044444444444444446	0	0.0810811	0.0810811	0	0.13953488372093023	0.034188	0.0816327	0.0425532	0.11258278145695365	0
Differentiation Purity % - 80 to 84 (25)	0.0656934	0	0.1	0.1	0	0.0789474	0	0	0.0606061	0	0	0.03125	0	0.0689655	0	0.0357143	0	0.0771704	0	0.0657895	0.0714286	0.0833333	0.029411764705882353	0	0.0798722	0.128	0.0722892	0.0983607	0.12903225806451613	0.12941176470588237	0.0983607	0.1	0	0.0762712	0.10480349344978165	0.0918367	0	0.05	0.0882353	0.029411764705882353	0	0	0	0.10714285714285714	0.027777777777777776	0	0	0.0830565	0.0882353
Differentiation Purity % - 85 to 89 (24)	0.0357143	0.014492753623188406	0.14893617021276595	0.10256410256410256	0.025641	0.0810811	0	0	0	0.03125	0	0.0666667	0.0333333	0	0.0740741	0.037037037037037035	0.037037037037037035	0.0774194	0	0.0660793	0.0422535	0.0851064	0.0625	0	0.0766773	0.12	0.1282051282051282	0.0645161	0.030303030303030304	0.091954	0.015384615384615385	0.14893617021276595	0	0.11504424778761062	0.0956522	0.06	0.023255813953488372	0.0512821	0	0.030303030303030304	0	0	0	0.10778443113772455	0.028037383177570093	0.05	0	0.0761589	0
Differentiation Purity % - 70 to 74 (10)	0.031496062992125984	0	0.025641	0.0740741	0	0.0833333	0	0	0.0526316	0	0	0	0	0	0.0714286	0	0.16666666666666666	0.0322581	0	0.027027	0.034482758620689655	0.027777777777777776	0.0526316	0	0.0319489	0.0327869	0.027777777777777776	0	0.1111111111111111	0.0253165	0.0196078	0.025641	0	0.046729	0.039301310043668124	0.033707865168539325	0.1111111111111111	0	0	0	0	0.15384615384615385	0	0.049079754601226995	0.0212766	0	0	0.0332226	0.047619047619047616
Differentiation Purity % - <60 (9)	0.04	0	0	0	0	0	0	0.11764705882352941	0.11764705882352941	0	0	0	0	0	0	0	0	0.0290323	0	0.0225225	0.0350877	0	0.0555556	0.0625	0.028754	0	0	0	0	0	0	0	0	0.037383177570093455	0.030434782608695653	0.0224719	0.0357143	0	0	0	0.0769231	0	0	0.024096385542168676	0.021505376344086023	0	0.15	0.029900332225913623	0.05
Differentiation Purity % - 75 to 79 (8)	0.015748031496062992	0	0	0	0	0	0	0.125	0.058823529411764705	0	0.0666667	0	0.15384615384615385	0.0769231	0	0	0	0.025806451612903226	0	0.0272727	0.017543859649122806	0	0	0.0666667	0.025559105431309903	0.024793388429752067	0.014084507042253521	0.0204082	0.058823529411764705	0.025974025974025976	0.041666666666666664	0	0	0.028037383177570093	0.0350877	0.046511627906976744	0.037037037037037035	0.041666666666666664	0	0	0	0	0	0.018072289156626505	0.010752688172043012	0.0833333	0.047619047619047616	0.026578073089700997	0
Differentiation Purity % - 60 to 69 (5)	0.016129032258064516	0	0.029411764705882353	0.043478260869565216	0	0	0	0	0	0	0	0	0	0	0	0	0	0.016129032258064516	0.14285714285714285	0.00904977	0.0377358	0	0	0.0833333	0.0159744	0.025423728813559324	0.014705882352941176	0.044444444444444446	0	0.027027	0.021739130434782608	0.029411764705882353	0	0.00943396	0.021929824561403508	0.023529411764705882	0	0	0.0625	0.0714286	0	0	0	0.012195121951219513	0.0224719	0	0.0555556	0.016611295681063124	0
hiPSC-CM Maintenance/Maturation Media (if different) - Reported (51)	0.16216216216216217	0.010416666666666666	0.1095890410958904	0.0447761	0	0.0806452	0	0	0.016666666666666666	0	0.017241379310344827	0.0727273	0.0357143	0.0363636	0.0181818	0.018518518518518517	0.018518518518518517	0.1607717041800643	0.038461538461538464	0.12083333333333333	0.12222222222222222	0.0985915	0.0517241	0.017241379310344827	0.16293929712460065	0.16783216783216784	0.11650485436893204	0.13414634146341464	0.016666666666666666	0.12962962962962962	0.0689655	0.1095890410958904	0	0.1417910447761194	0.2025862068965517	0.14655172413793102	0.028985507246376812	0.0793651	0.05	0	0	0.037037037037037035	0.0196078	0.21142857142857144	0.022388059701492536	0.0615385	0.015625	0.16556291390728478	0.0677966
hiPSC-CM Maintenance/Maturation Media (if different) - RPMI-1640 (26)	0.0729927	0	0.14285714285714285	0.022727272727272728	0	0.0769231	0	0	0.0285714	0	0.030303030303030304	0.030303030303030304	0.03125	0.0666667	0	0.034482758620689655	0.034482758620689655	0.083871	0.0740741	0.0655022	0.0704225	0.0816327	0.0285714	0.030303030303030304	0.0830671	0.12698412698412698	0.1111111111111111	0.0967742	0.0285714	0.1411764705882353	0.0793651	0.14285714285714285	0	0.0406504	0.11403508771929824	0.1134020618556701	0.045454545454545456	0.13157894736842105	0.0857143	0	0	0.0689655	0	0.15432098765432098	0	0	0	0.0863787	0.027027
hiPSC-CM Maintenance/Maturation Media (if different) - DMEM (11)	0.0393701	0	0.025	0.0714286	0	0.038461538461538464	0	0	0	0	0	0.1875	0	0	0	0	0	0.035483870967741936	0	0.022321428571428572	0.0701754	0.027027	0	0.0555556	0.0351438	0.040983606557377046	0.013513513513513514	0.0816327	0	0.012345679012345678	0	0.025	0	0.046296296296296294	0.043668122270742356	0.0333333	0.0333333	0	0	0	0	0.0666667	0.0909091	0.0424242	0.021052631578947368	0.0740741	0	0.036544850498338874	0
hiPSC-CM Maintenance/Maturation Media (if different) - Specialised (8)	0.0403226	0.018867924528301886	0	0	0	0.043478260869565216	0	0	0	0	0	0	0.0714286	0	0	0	0	0.025806451612903226	0	0.0226244	0.0357143	0.029411764705882353	0	0	0.025559105431309903	0.024793388429752067	0.0285714	0.0204082	0	0.0128205	0.0204082	0	0	0.018518518518518517	0.021645021645021644	0.034482758620689655	0	0	0	0	0	0	0	0.00595238	0.010752688172043012	0	0.047619047619047616	0.023178807947019868	0.17647058823529413
hiPSC-CM Maintenance/Maturation Media (if different) - DMEM/F12 (6)	0.032520325203252036	0	0.0285714	0	0	0.047619047619047616	0	0	0	0	0	0	0	0	0	0	0	0.0160772	0	0.013574660633484163	0	0.03125	0.14285714285714285	0	0.019169329073482427	0.00826446	0.014492753623188406	0	0	0.013157894736842105	0	0.0285714	0	0.058823529411764705	0.0263158	0	0	0	0	0	0	0	0	0.024539877300613498	0	0.0909091	0	0.019933554817275746	0
hiPSC-CM Maintenance/Maturation Media (if different) - Modified Essential Medium (1)	0	0	0	0	0	0	0	0	0	0	0	0	0	0	0.2	0	0	0.00322581	0	0.00458716	0	0	0	0	0.00319489	0	0	0	0	0	0	0	0	0.00980392	0.00438596	0	0	0	0	0	0	0	0	0.00621118	0	0	0	0.00332226	0
hiPSC-CM Matrix Coating if Replated - Reported (152)	0.21875	0.2073170731707317	0.0898204	0.0555556	0.0632911	0.0566038	0.0382166	0.0253165	0.0253165	0.012578616352201259	0.0457516	0.0322581	0.025806451612903226	0	0.026143790849673203	0.00645161	0.00645161	0.4855305466237942	0	0.36531365313653136	0.15428571428571428	0.0981595	0.038461538461538464	0.025641	0.48562300319488816	0.2350230414746544	0.16756756756756758	0.0898876	0.0253165	0.14358974358974358	0.0777778	0.0898204	0	0.2037914691943128	0.34275618374558303	0.21243523316062177	0.0487805	0.024242424242424242	0.018633540372670808	0.0253165	0.012903225806451613	0.012903225806451613	0.00657895	0.30962343096234307	0.25925925925925924	0.0429448	0.024691358024691357	0.49504950495049505	0.044585987261146494
hiPSC-CM Matrix Coating if Replated - Matrigel (64)	0.14906832298136646	0.028037383177570093	0.13253012048192772	0.0641026	0.012658227848101266	0.0526316	0.0273973	0.027777777777777776	0.027777777777777776	0	0.0285714	0.0746269	0.0441176	0	0.014705882352941176	0.014925373134328358	0.014925373134328358	0.20257234726688103	0	0.13709677419354838	0.15151515151515152	0.10975609756097561	0.0422535	0.043478260869565216	0.20447284345047922	0.19205298013245034	0.1743119266055046	0.0816327	0.027777777777777776	0.13445378151260504	0.049505	0.13253012048192772	0	0.16083916083916083	0.23728813559322035	0.21666666666666667	0.037037037037037035	0.0253165	0.0410959	0.027777777777777776	0.014705882352941176	0.014705882352941176	0	0.22950819672131148	0.0791367	0.0379747	0.0263158	0.21262458471760798	0.0410959
hiPSC-CM Matrix Coating if Replated - Gelatin (43)	0.0512821	0.36923076923076925	0.013888888888888888	0.0333333	0.0535714	0.017241379310344827	0	0.06	0	0.04	0.0625	0	0	0	0.0212766	0	0	0.13870967741935483	0	0.125	0.0689655	0.09375	0	0.0408163	0.13738019169329074	0.046052631578947366	0.00943396	0.0759494	0	0.045871559633027525	0.0493827	0.013888888888888888	0	0.0431655	0.046332	0.016260162601626018	0.016129032258064516	0.0169492	0.018518518518518517	0.019230769230769232	0.0212766	0	0	0.046153846153846156	0.27722772277227725	0	0.017857142857142856	0.14285714285714285	0.0377358
hiPSC-CM Matrix Coating if Replated - Fibronectin (32)	0.0625	0.0684932	0.0333333	0.0408163	0.0909091	0.0666667	0.10256410256410256	0.024390243902439025	0	0	0.1111111111111111	0	0	0	0.027777777777777776	0	0	0.1032258064516129	0	0.10619469026548672	0.0512821	0.017241379310344827	0.0769231	0	0.10223642172523961	0.080292	0.0909091	0.0136986	0.05	0.061855670103092786	0.0724638	0.0333333	0	0.0983607	0.0743802	0.045871559633027525	0.0196078	0	0.023255813953488372	0.024390243902439025	0	0	0	0.0782123	0.0825688	0.041666666666666664	0.045454545454545456	0.0990099	0
hiPSC-CM Matrix Coating if Replated - Geltrex (10)	0.048	0.037037037037037035	0.025641	0	0.0833333	0	0	0	0	0	0	0	0	0	0	0	0	0.0322581	0	0.027027	0.034482758620689655	0.0571429	0	0	0.0319489	0.016129032258064516	0.0136986	0.0196078	0	0.0125	0	0.025641	0	0.00900901	0.034782608695652174	0.0697674	0	0.038461538461538464	0	0	0	0	0	0.042682926829268296	0.0212766	0	0	0.0332226	0
hiPSC-CM Matrix Coating if Replated - Specialised (8)	0.032	0.018867924528301886	0	0	0	0	0	0	0.125	0	0	0	0	0	0.0833333	0	0	0.025806451612903226	0	0.0319635	0.017543859649122806	0	0	0	0.025559105431309903	0	0	0	0	0	0	0	0	0.018518518518518517	0.021645021645021644	0.022727272727272728	0	0	0	0	0	0	0.125	0.024242424242424242	0.010752688172043012	0.0833333	0	0.026578073089700997	0.0526316
hiPSC-CM Matrix Coating if Replated - Laminin (5)	0.008	0.02	0	0	0	0	0	0	0	0	0.18181818181818182	0	0.0909091	0	0	0	0	0.016129032258064516	0	0.022935779816513763	0	0	0	0	0.0159744	0.00833333	0.014705882352941176	0	0	0	0	0	0	0	0.00865801	0.023529411764705882	0	0	0	0	0	0	0	0	0.0340909	0	0	0.016611295681063124	0.0625
hiPSC-CM Matrix Coating if Replated - Synthemax (3)	0.0163934	0	0	0	0	0.0555556	0	0	0	0	0	0	0	0	0	0	0	0.00967742	0	0.013761467889908258	0	0	0	0	0.00958466	0.00847458	0.015151515151515152	0	0	0	0	0	0	0.00961538	0.013157894736842105	0	0.15	0.0526316	0	0	0	0.14285714285714285	0	0.012345679012345678	0.011363636363636364	0	0	0.00996678	0
Metabolic Maturation (30)	0.0942029	0	0.0714286	0.0888889	0	0.0952381	0	0	0.025641	0	0	0.11764705882352941	0.027777777777777776	0	0.029411764705882353	0	0.0625	0.0967742	0	0.0553191	0.1267605633802817	0.0555556	0.0810811	0.0555556	0.0958466	0.10606060606060606	0.0804598	0.0909091	0.025641	0.052083333333333336	0.014084507042253521	0.0714286	0	0.11864406779661017	0.11688311688311688	0.0769231	0.0638298	0	0.05	0	0	0.0606061	0.0333333	0.12352941176470589	0.017543859649122806	0.11627906976744186	0.023255813953488372	0.0960265	0
Metabolic Maturation Strategy - Reported (30)	0.0942029	0	0.0714286	0.0888889	0	0.0952381	0	0	0.025641	0	0	0.11764705882352941	0.027777777777777776	0	0.029411764705882353	0	0.0625	0.0967742	0	0.0553191	0.1267605633802817	0.0555556	0.0810811	0.0555556	0.0958466	0.10606060606060606	0.0804598	0.0909091	0.025641	0.052083333333333336	0.014084507042253521	0.0714286	0	0.11864406779661017	0.11688311688311688	0.0769231	0.0638298	0	0.05	0	0	0.0606061	0.0333333	0.12352941176470589	0.017543859649122806	0.11627906976744186	0.023255813953488372	0.0960265	0
Metabolic Maturation Strategy - T3 (14)	0.0546875	0	0.047619047619047616	0.0645161	0	0.1111111111111111	0	0	0	0	0	0	0.05	0	0	0	0	0.0451613	0	0.0265487	0.0666667	0	0.0909091	0.1	0.0447284	0.056910569105691054	0.0684932	0.037037037037037035	0	0.024096385542168676	0	0.047619047619047616	0	0.0740741	0.056768558951965066	0.0322581	0.030303030303030304	0	0.04	0	0	0.0555556	0.0714286	0.0606061	0	0.10344827586206896	0	0.0430464	0
Metabolic Maturation Strategy - Palmitic Acid (10)	0.0396825	0	0.0526316	0.0357143	0	0.04	0	0	0	0	0	0.058823529411764705	0	0	0.0714286	0	0.0769231	0.0322581	0	0.017857142857142856	0.0526316	0	0.17647058823529413	0	0.0319489	0.024390243902439025	0.027777777777777776	0	0.0526316	0.0253165	0	0.0526316	0	0.0566038	0.043859649122807015	0.022222222222222223	0	0	0.047619047619047616	0	0	0	0.1	0.049079754601226995	0	0.0769231	0	0.0332226	0
Metabolic Maturation Strategy - Specialised (9)	0.015625	0	0.0540541	0.037037037037037035	0	0.0869565	0	0	0.0555556	0	0	0	0	0	0.0769231	0	0.18181818181818182	0.0290323	0	0.017937219730941704	0.0350877	0.058823529411764705	0	0.0625	0.028754	0.041666666666666664	0.0428571	0.0408163	0	0.038961	0.02	0.0540541	0	0.027777777777777776	0.039473684210526314	0.0224719	0.11538461538461539	0	0	0	0	0.16666666666666666	0.1111111111111111	0.0429448	0	0.038461538461538464	0.045454545454545456	0.029900332225913623	0
Metabolic Maturation Strategy - Dexamethasone (7)	0.0406504	0	0.027777777777777776	0.04	0	0.045454545454545456	0	0	0	0	0	0	0	0	0	0	0	0.0225806	0	0.013513513513513514	0.017857142857142856	0	0.13333333333333333	0.0714286	0.022364217252396165	0.0165289	0.014285714285714285	0.020833333333333332	0	0.012987012987012988	0	0.027777777777777776	0	0.0480769	0.0307018	0.011363636363636364	0.038461538461538464	0	0	0	0	0.0909091	0	0.037037037037037035	0	0.041666666666666664	0	0.023255813953488372	0
Metabolic Maturation Strategy - L-carnitine (6)	0.024193548387096774	0	0	0	0	0	0	0	0	0	0	0.2727272727272727	0	0	0	0	0	0.0193548	0	0.00900901	0.0566038	0.03125	0	0	0.019169329073482427	0.016666666666666666	0	0.043478260869565216	0	0	0	0	0	0.00934579	0.017391304347826087	0.0352941	0	0	0	0	0	0	0	0.012121212121212121	0.022222222222222223	0.0909091	0	0.019933554817275746	0
Metabolic Maturation Strategy - Linoleic/Oleic Acid (4)	0	0	0.0625	0.0952381	0	0	0	0	0	0	0	0.0909091	0.1	0	0	0	0	0.012903225806451613	0	0.00452489	0.038461538461538464	0	0.0769231	0	0.012779552715654952	0.034482758620689655	0.030303030303030304	0.022222222222222223	0.0769231	0.0273973	0	0.0625	0	0.00952381	0.013100436681222707	0.011764705882352941	0	0	0.0666667	0	0	0	0	0.018518518518518517	0	0	0	0.00993377	0
Metabolic Maturation Strategy - Lactate (4)	0	0	0	0	0	0	0	0	0	0	0	0.3333333333333333	0.1	0	0	0	0	0.012903225806451613	0	0	0.058823529411764705	0.0333333	0	0	0.012779552715654952	0.025641	0.014925373134328358	0.045454545454545456	0	0	0	0	0	0	0.013100436681222707	0.0361446	0	0	0	0	0	0	0	0.00609756	0.022727272727272728	0	0	0.00993377	0
Metabolic Maturation Strategy - Creatine (3)	0	0	0	0	0	0	0	0	0	0	0	0.375	0	0	0	0	0	0.00967742	0	0	0.0392157	0.034482758620689655	0	0	0.00958466	0.017094017094017096	0	0.046511627906976744	0	0	0	0	0	0	0.013157894736842105	0.036585365853658534	0	0	0	0	0	0	0	0.00613497	0.022988505747126436	0	0	0.00996678	0
Metabolic Maturation Strategy - Taurine (3)	0	0	0	0	0	0	0	0	0	0	0	0.375	0	0	0	0	0	0.00967742	0	0	0.0392157	0.034482758620689655	0	0	0.00958466	0.017094017094017096	0	0.046511627906976744	0	0	0	0	0	0	0.013157894736842105	0.036585365853658534	0	0	0	0	0	0	0	0.00613497	0.022988505747126436	0	0	0.00996678	0
Metabolic Maturation Strategy - Nonessential Amino Acids (3)	0	0	0	0	0	0	0	0	0	0	0	0.375	0	0	0	0	0	0.00967742	0	0	0.0392157	0.034482758620689655	0	0	0.00958466	0.017094017094017096	0	0.046511627906976744	0	0	0	0	0	0	0.013157894736842105	0.036585365853658534	0	0	0	0	0	0	0	0.00613497	0.022988505747126436	0	0	0.00996678	0
Metabolic Maturation Strategy - Insulin-Transferrin-Selenium (3)	0.024793388429752067	0	0	0	0	0	0	0	0	0	0	0	0	0	0	0	0	0.00967742	0	0.00913242	0.019230769230769232	0	0	0	0.00958466	0	0	0	0	0	0	0	0	0.00961538	0.00434783	0	0	0	0	0	0	0	0	0.00613497	0	0.10526315789473684	0	0.00996678	0
Metabolic Maturation Strategy - Galactose (3)	0.0163934	0	0	0	0	0.0555556	0	0	0	0	0	0	0	0	0	0	0	0.00967742	0	0.00913242	0.019230769230769232	0	0	0	0.00958466	0.00847458	0.015151515151515152	0	0	0	0	0	0	0.029411764705882353	0.013157894736842105	0	0	0	0	0	0	0	0	0.018633540372670808	0	0	0	0.00996678	0
Metabolic Maturation Strategy - Vitamin B12 (3)	0	0	0	0	0	0	0	0	0	0	0	0.375	0	0	0	0	0	0.00967742	0	0	0.0392157	0.034482758620689655	0	0	0.00958466	0.017094017094017096	0	0.046511627906976744	0	0	0	0	0	0	0.013157894736842105	0.036585365853658534	0	0	0	0	0	0	0	0.00613497	0.022988505747126436	0	0	0.00996678	0
Metabolic Maturation Strategy - Biotin (3)	0	0	0	0	0	0	0	0	0	0	0	0.375	0	0	0	0	0	0.00967742	0	0	0.0392157	0.034482758620689655	0	0	0.00958466	0.017094017094017096	0	0.046511627906976744	0	0	0	0	0	0	0.013157894736842105	0.036585365853658534	0	0	0	0	0	0	0	0.00613497	0.022988505747126436	0	0	0.00996678	0
Metabolic Maturation Strategy - Ascorbic Acid (3)	0	0	0	0	0	0	0	0	0	0	0	0.375	0	0	0	0	0	0.00967742	0	0	0.0392157	0.034482758620689655	0	0	0.00958466	0.017094017094017096	0	0.046511627906976744	0	0	0	0	0	0	0.013157894736842105	0.036585365853658534	0	0	0	0	0	0	0	0.00613497	0.022988505747126436	0	0	0.00996678	0
Metabolic Maturation Strategy - Albumax (3)	0	0	0	0	0	0	0	0	0	0	0	0.375	0	0	0	0	0	0.00967742	0	0	0.0392157	0.034482758620689655	0	0	0.00958466	0.017094017094017096	0	0.046511627906976744	0	0	0	0	0	0	0.013157894736842105	0.036585365853658534	0	0	0	0	0	0	0	0.00613497	0.022988505747126436	0	0	0.00996678	0
Metabolic Maturation Strategy - B27 (3)	0	0	0	0	0	0	0	0	0	0	0	0.375	0	0	0	0	0	0.00967742	0	0	0.0392157	0.034482758620689655	0	0	0.00958466	0.017094017094017096	0	0.046511627906976744	0	0	0	0	0	0	0.013157894736842105	0.036585365853658534	0	0	0	0	0	0	0	0.00613497	0.022988505747126436	0	0	0.00996678	0
Metabolic Maturation Strategy - KOSR (3)	0	0	0	0	0	0	0	0	0	0	0	0.375	0	0	0	0	0	0.00967742	0	0	0.0392157	0.034482758620689655	0	0	0.00958466	0.017094017094017096	0	0.046511627906976744	0	0	0	0	0	0	0.013157894736842105	0.036585365853658534	0	0	0	0	0	0	0	0.00613497	0.022988505747126436	0	0	0.00996678	0
Metabolic Maturation Strategy - IGF-1 (3)	0.0163934	0	0	0.047619047619047616	0	0	0	0	0	0	0	0	0	0	0	0	0	0.00967742	0	0.013761467889908258	0	0	0	0	0.00958466	0.00847458	0	0.022727272727272728	0	0	0	0	0	0.019417475728155338	0.013157894736842105	0.011904761904761904	0	0	0	0	0	0	0	0.018633540372670808	0	0	0	0.00996678	0
Metabolic Maturation Strategy (Broad) - Known (30)	0.0942029	0	0.0714286	0.0888889	0	0.0952381	0	0	0.025641	0	0	0.11764705882352941	0.027777777777777776	0	0.029411764705882353	0	0.0625	0.0967742	0	0.0553191	0.1267605633802817	0.0555556	0.0810811	0.0555556	0.0958466	0.10606060606060606	0.0804598	0.0909091	0.025641	0.052083333333333336	0.014084507042253521	0.0714286	0	0.11864406779661017	0.11688311688311688	0.0769231	0.0638298	0	0.05	0	0	0.0606061	0.0333333	0.12352941176470589	0.017543859649122806	0.11627906976744186	0.023255813953488372	0.0960265	0
Metabolic Maturation Strategy (Broad) - Metabolic Modulation (19)	0.0606061	0	0.0652174	0.0555556	0	0.029411764705882353	0	0	0	0	0	0.17391304347826086	0.04	0	0.043478260869565216	0	0.045454545454545456	0.0612903	0	0.030434782608695653	0.13114754098360656	0.022222222222222223	0.11538461538461539	0	0.0607029	0.0629921	0.0506329	0.0517241	0.0357143	0.034482758620689655	0	0.0652174	0	0.0707965	0.0692641	0.0631579	0	0	0.0333333	0	0	0	0.0526316	0.0714286	0.019417475728155338	0.12121212121212122	0	0.059602649006622516	0
Metabolic Maturation Strategy (Broad) - Fatty Acid and Lipids (19)	0.0606061	0	0.0652174	0.0555556	0	0.029411764705882353	0	0	0	0	0	0.17391304347826086	0.04	0	0.043478260869565216	0	0.045454545454545456	0.0612903	0	0.030434782608695653	0.13114754098360656	0.022222222222222223	0.11538461538461539	0	0.0607029	0.0629921	0.0506329	0.0517241	0.0357143	0.034482758620689655	0	0.0652174	0	0.0707965	0.0692641	0.0631579	0	0	0.0333333	0	0	0	0.0526316	0.0714286	0.019417475728155338	0.12121212121212122	0	0.059602649006622516	0
Metabolic Maturation Strategy (Broad) - Hormonal Stimulation (15)	0.0542636	0	0.046511627906976744	0.0625	0	0.10714285714285714	0	0	0	0	0	0	0.047619047619047616	0	0.0526316	0	0	0.0483871	0	0.030973451327433628	0.0655738	0	0.0869565	0.0952381	0.0479233	0.056451612903225805	0.0675676	0.0363636	0	0.023809523809523808	0	0.046511627906976744	0	0.0833333	0.0611354	0.031914893617021274	0.029411764705882353	0	0.038461538461538464	0	0	0.0526316	0.0666667	0.0666667	0	0.1	0	0.046357615894039736	0
Metabolic Maturation Strategy (Broad) - Thyroid Hormones (14)	0.0546875	0	0.047619047619047616	0.0645161	0	0.1111111111111111	0	0	0	0	0	0	0.05	0	0	0	0	0.0451613	0	0.0265487	0.0666667	0	0.0909091	0.1	0.0447284	0.056910569105691054	0.0684932	0.037037037037037035	0	0.024096385542168676	0	0.047619047619047616	0	0.0740741	0.056768558951965066	0.0322581	0.030303030303030304	0	0.04	0	0	0.0555556	0.0714286	0.0606061	0	0.10344827586206896	0	0.0430464	0
Metabolic Maturation Strategy (Broad) - Sugar and Carbohydrates (7)	0.015873015873015872	0	0	0	0	0.045454545454545456	0	0	0	0	0	0.25	0.0769231	0	0	0	0	0.0225806	0	0.00896861	0.0754717	0.030303030303030304	0	0	0.022364217252396165	0.0336134	0.028985507246376812	0.0425532	0	0	0	0	0	0.0283019	0.026200873362445413	0.0348837	0	0	0	0	0	0	0	0.024390243902439025	0.021978	0	0	0.019867549668874173	0
Metabolic Maturation Strategy (Broad) - Glucocorticoids (7)	0.0406504	0	0.027777777777777776	0.04	0	0.045454545454545456	0	0	0	0	0	0	0	0	0	0	0	0.0225806	0	0.013513513513513514	0.017857142857142856	0	0.13333333333333333	0.0714286	0.022364217252396165	0.0165289	0.014285714285714285	0.020833333333333332	0	0.012987012987012988	0	0.027777777777777776	0	0.0480769	0.0307018	0.011363636363636364	0.038461538461538464	0	0	0	0	0.0909091	0	0.037037037037037035	0	0.041666666666666664	0	0.023255813953488372	0
Metabolic Maturation Strategy (Broad) - Signaling Pathway Regulators (6)	0.016	0	0.058823529411764705	0	0	0.047619047619047616	0	0	0.0666667	0	0	0	0	0	0	0	0.25	0.0193548	0	0.0044843	0.037037037037037035	0.0645161	0	0.0769231	0.019169329073482427	0.025210084033613446	0.029411764705882353	0.0212766	0	0.0405405	0.0212766	0.058823529411764705	0	0	0.0263158	0.023255813953488372	0.13043478260869565	0	0	0	0	0.2222222222222222	0.16666666666666666	0.024539877300613498	0	0.043478260869565216	0.0526316	0.019933554817275746	0
Metabolic Maturation Strategy (Broad) - Nutrition and Supplements (6)	0.024193548387096774	0	0	0	0	0	0	0	0	0	0	0.2727272727272727	0	0	0	0	0	0.0193548	0	0.00900901	0.0566038	0.03125	0	0	0.019169329073482427	0.016666666666666666	0	0.043478260869565216	0	0	0	0	0	0.00934579	0.017391304347826087	0.0352941	0	0	0	0	0	0	0	0.012121212121212121	0.022222222222222223	0.0909091	0	0.019933554817275746	0
Metabolic Maturation Strategy (Broad) - Structural and Functional Protein (5)	0	0	0	0.043478260869565216	0	0.05	0	0	0	0	0	0.3	0	0	0	0	0	0.016129032258064516	0	0.00904977	0.0377358	0.0322581	0	0	0.0159744	0.034188	0.014705882352941176	0.0681818	0	0	0	0	0	0.0190476	0.021929824561403508	0.0357143	0	0	0	0	0	0	0	0.018404907975460124	0.0224719	0	0	0.016611295681063124	0
Metabolic Maturation Strategy (Broad) - Amino Acids and Derivatives (5)	0	0	0	0.043478260869565216	0	0.05	0	0	0	0	0	0.3	0	0	0	0	0	0.016129032258064516	0	0.00904977	0.0377358	0.0322581	0	0	0.0159744	0.034188	0.014705882352941176	0.0681818	0	0	0	0	0	0.0190476	0.021929824561403508	0.0357143	0	0	0	0	0	0	0	0.018404907975460124	0.0224719	0	0	0.016611295681063124	0
Metabolic Maturation Strategy (Broad) - Growth Factors (4)	0.016260162601626018	0	0	0.045454545454545456	0	0	0	0	0	0	0	0	0	0	0.125	0	0	0.012903225806451613	0	0.0183486	0	0	0	0	0.012779552715654952	0.00840336	0	0.022222222222222223	0	0	0	0	0	0.0291262	0.017543859649122806	0.011764705882352941	0	0	0	0	0	0	0	0.024844720496894408	0	0	0	0.013289036544850499	0
Metabolic Maturation Strategy (Broad) - Specialised (4)	0.016260162601626018	0	0.030303030303030304	0	0	0	0	0	0	0	0	0	0	0	0	0	0.14285714285714285	0.012903225806451613	0	0.00452489	0.038461538461538464	0.0333333	0	0	0.012779552715654952	0.0169492	0.014925373134328358	0.022222222222222223	0	0.0273973	0.022222222222222223	0.030303030303030304	0	0	0.017543859649122806	0.023809523809523808	0.043478260869565216	0	0	0	0	0	0.25	0.012269938650306749	0	0.047619047619047616	0.058823529411764705	0.013289036544850499	0
Metabolic Maturation Strategy (Broad) - Kinase Inhibitors (3)	0.00813008	0	0.03125	0	0	0.0555556	0	0	0.0833333	0	0	0	0	0	0	0	0.16666666666666666	0.00967742	0	0	0	0.0714286	0	0.1	0.00958466	0.017094017094017096	0.015151515151515152	0.022727272727272728	0	0.027777777777777776	0.022727272727272728	0.03125	0	0	0.013157894736842105	0	0.15	0	0	0	0	0.3333333333333333	0	0.012345679012345678	0	0	0.0625	0.00996678	0
Metabolic Maturation Strategy (Broad) - Vitamins and Minerals (3)	0	0	0	0	0	0	0	0	0	0	0	0.375	0	0	0	0	0	0.00967742	0	0	0.0392157	0.034482758620689655	0	0	0.00958466	0.017094017094017096	0	0.046511627906976744	0	0	0	0	0	0	0.013157894736842105	0.036585365853658534	0	0	0	0	0	0	0	0.00613497	0.022988505747126436	0	0	0.00996678	0
Metabolic Maturation Strategy (Broad) - Insulin and Related Components (3)	0.024793388429752067	0	0	0	0	0	0	0	0	0	0	0	0	0	0	0	0	0.00967742	0	0.00913242	0.019230769230769232	0	0	0	0.00958466	0	0	0	0	0	0	0	0	0.00961538	0.00434783	0	0	0	0	0	0	0	0	0.00613497	0	0.10526315789473684	0	0.00996678	0
Metabolic Maturation Strategy (Broad) - Serum and Serum Replacements (3)	0	0	0	0	0	0	0	0	0	0	0	0.375	0	0	0	0	0	0.00967742	0	0	0.0392157	0.034482758620689655	0	0	0.00958466	0.017094017094017096	0	0.046511627906976744	0	0	0	0	0	0	0.013157894736842105	0.036585365853658534	0	0	0	0	0	0	0	0.00613497	0.022988505747126436	0	0	0.00996678	0
Electrical Maturation (38)	0.0965517	0.0769231	0.0625	0.017857142857142856	0.08	0.018867924528301886	0.0425532	0	0.043478260869565216	0	0.022222222222222223	0	0.0714286	0	0	0.024390243902439025	0	0.12258064516129032	0.025	0.1277533039647577	0.047619047619047616	0.0483871	0.0212766	0.022222222222222223	0.12140575079872204	0.1	0.10869565217391304	0.025641	0.043478260869565216	0.09	0.0666667	0.0625	0	0.09375	0.0946502	0.0810811	0	0.018518518518518517	0.0204082	0	0	0	0	0.0874317	0.12727272727272726	0.037037037037037035	0.0196078	0.12624584717607973	0.0869565
Tension Maturation (64)	0.12121212121212122	0.047619047619047616	0.14634146341463414	0.0506329	0.012658227848101266	0.025641	0.041666666666666664	0	0.027777777777777776	0	0.043478260869565216	0.043478260869565216	0.0757576	0.09375	0.029850746268656716	0	0	0.20257234726688103	0.046875	0.1652892561983471	0.0961538	0.10975609756097561	0.0422535	0.0285714	0.20447284345047922	0.2413793103448276	0.1743119266055046	0.13978494623655913	0.0422535	0.22727272727272727	0.15217391304347827	0.14634146341463414	0	0.14482758620689656	0.24786324786324787	0.15873015873015872	0.05	0.14084507042253522	0.0857143	0.0571429	0.014705882352941176	0.029850746268656716	0	0.22950819672131148	0.10294117647058823	0	0.04	0.20065789473684212	0.027027
Other Cells Maturation (77)	0.14450867052023122	0.0603448	0.15053763440860216	0.043478260869565216	0.021978	0.0689655	0.047619047619047616	0.0609756	0.0357143	0	0.024096385542168676	0.024096385542168676	0.037037037037037035	0.012195121951219513	0.012345679012345678	0	0	0.2403846153846154	0.038961	0.23430962343096234	0.0948276	0.029703	0.0481928	0.024096385542168676	0.24203821656050956	0.23717948717948717	0.20512820512820512	0.0818182	0.0481928	0.1935483870967742	0.11214953271028037	0.15053763440860216	0	0.19333333333333333	0.2551440329218107	0.14388489208633093	0.0659341	0.010752688172043012	0.0853659	0.0609756	0.025	0.025	0	0.19597989949748743	0.16428571428571428	0.043956	0.0581395	0.24752475247524752	0
Mechanical Maturation (34)	0.0992908	0.0666667	0.0322581	0.0392157	0.041666666666666664	0.0204082	0.0714286	0.023255813953488372	0	0	0.024390243902439025	0	0.0512821	0	0.0263158	0.027027	0.027027	0.10967741935483871	0	0.125	0.05	0.016666666666666666	0.023255813953488372	0	0.10862619808306709	0.0869565	0.10112359550561797	0.027027	0.023255813953488372	0.0714286	0.0704225	0.0322581	0	0.0793651	0.0916667	0.10476190476190476	0.038461538461538464	0.02	0	0.023255813953488372	0.0263158	0	0	0.11428571428571428	0.0810811	0	0	0.10927152317880795	0.045454545454545456
Cell Alignment Maturation (55)	0.13548387096774195	0.0631579	0.0897436	0.027777777777777776	0.0597015	0.0441176	0.0819672	0.015625	0.031746031746031744	0.0491803	0.0327869	0	0.0163934	0.016666666666666666	0	0	0.017241379310344827	0.1774193548387097	0.017543859649122806	0.18695652173913044	0.05	0.0512821	0	0.05	0.1757188498402556	0.14	0.13333333333333333	0.0659341	0.015625	0.14545454545454545	0.11494252873563218	0.0897436	0	0.12949640287769784	0.1598360655737705	0.12295081967213115	0.056338028169014086	0.014084507042253521	0.015151515151515152	0.015625	0.0169492	0.034482758620689655	0	0.125	0.1557377049180328	0.028169014084507043	0.029850746268656716	0.17491749174917492	0.0307692
Elastomeric Maturation (33)	0.033557	0.0821918	0.125	0.04	0.11363636363636363	0.0425532	0.047619047619047616	0	0.075	0.05	0.025	0.025	0	0	0	0	0.027777777777777776	0.10289389067524116	0	0.10087719298245613	0.0641026	0.034482758620689655	0.023809523809523808	0.0512821	0.10543130990415335	0.0875912	0.0898876	0.041666666666666664	0.023809523809523808	0.10638297872340426	0.056338028169014086	0.125	0	0.0546875	0.0875	0.10576923076923077	0.06	0	0.022727272727272728	0	0.027027	0.0555556	0	0.0898876	0.0917431	0.0408163	0.044444444444444446	0.10231023102310231	0
Extracellular Matrix Maturation (18)	0.0775194	0.015873015873015872	0.0212766	0	0	0.030303030303030304	0.0740741	0	0	0	0	0	0.041666666666666664	0	0.045454545454545456	0	0.047619047619047616	0.0580645	0	0.0727273	0.030303030303030304	0	0	0	0.057508	0.0634921	0.10810810810810811	0	0	0.047058823529411764	0.0526316	0.0212766	0	0.10091743119266056	0.0649351	0.030927835051546393	0	0.029411764705882353	0	0	0	0	0	0.0718563	0.050505050505050504	0.0285714	0	0.059800664451827246	0
3D Cell Types - Reported (154)	0.3853503184713376	0.1464968152866242	0.0955414	0.0605096	0.050955414012738856	0.050955414012738856	0.0350318	0.0318471	0.0318471	0.028662420382165606	0.025477707006369428	0.025477707006369428	0.022292993630573247	0.0191083	0.0159236	0.012738853503184714	0.012738853503184714	0.9872611464968153	0.00955414	0.6942675159235668	0.1592356687898089	0.0859873	0.0318471	0.025477707006369428	0.9968152866242038	0.36942675159235666	0.20382165605095542	0.1337579617834395	0.0318471	0.22611464968152867	0.1337579617834395	0.0955414	0.00318471	0.3248407643312102	0.7261146496815286	0.2611464968152866	0.0636943	0.054140127388535034	0.0382166	0.0318471	0.0159236	0.0159236	0.00318471	0.5127388535031847	0.27388535031847133	0.0573248	0.044585987261146494	0.9585987261146497	0.0382166
3D Cell Types - Cardiomyocyte (154)	0	0	0	0	0	0	0	0	0	0	0	0	0	0	0	0	0	0	0	0	0	0	0	0	0	0	0	0	0	0	0	0	0	0	0	0	0	0	0	0	0	0	0	0	0	0	0	0	0
3D Cell Types - Stromal Cell (76)	0	0	0	0	0	0	0	0	0	0	0	0	0	0	0	0	0	0	0	0	0	0	0	0	0	0	0	0	0	0	0	0	0	0	0	0	0	0	0	0	0	0	0	0	0	0	0	0	0
3D Cell Types - Endothelial Cell (34)	0	0	0	0	0	0	0	0	0	0	0	0	0	0	0	0	0	0	0	0	0	0	0	0	0	0	0	0	0	0	0	0	0	0	0	0	0	0	0	0	0	0	0	0	0	0	0	0	0
3D Cell Types - Specialised (3)	0	0	0	0	0	0	0	0	0	0	0	0	0	0	0	0	0	0	0	0	0	0	0	0	0	0	0	0	0	0	0	0	0	0	0	0	0	0	0	0	0	0	0	0	0	0	0	0	0
3D Stromal Cell Type - Reported (77)	0.13142857142857142	0.10810810810810811	0.13829787234042554	0.043478260869565216	0.021978	0.0449438	0.0731707	0.0481928	0.0357143	0	0.024096385542168676	0.011904761904761904	0.037037037037037035	0	0.012345679012345678	0	0	0.2403846153846154	0.038961	0.22916666666666666	0.10434782608695652	0.029703	0.0481928	0.024096385542168676	0.24203821656050956	0.2138364779874214	0.19491525423728814	0.0625	0.0481928	0.1935483870967742	0.12264150943396226	0.13829787234042554	0	0.18543046357615894	0.23481781376518218	0.1276595744680851	0.0659341	0.010752688172043012	0.0722892	0.0609756	0.025	0.025	0	0.18407960199004975	0.1897810218978102	0.0326087	0.0705882	0.24752475247524752	0
3D Stromal Cell Type - SC (34)	0.0544218	0.0526316	0.12280701754385964	0.0392157	0.0204082	0.041666666666666664	0.097561	0.023255813953488372	0	0	0	0.024390243902439025	0	0	0.0263158	0	0	0.10256410256410256	0.0882353	0.11013215859030837	0.0632911	0	0.0731707	0	0.10509554140127389	0.13636363636363635	0.12643678160919541	0.0704225	0.047619047619047616	0.15384615384615385	0.13432835820895522	0.12280701754385964	0	0.10569105691056911	0.1148936170212766	0.045045	0.038461538461538464	0.02	0.12195121951219512	0.047619047619047616	0	0.0540541	0	0.10795454545454546	0.0909091	0	0.043478260869565216	0.11295681063122924	0
3D Stromal Cell Type - hCF (30)	0.0486111	0.11764705882352941	0.0714286	0	0.022222222222222223	0	0.0512821	0.0526316	0.0810811	0	0.0555556	0	0.0882353	0	0	0	0	0.0932476	0	0.092511	0.0958904	0.017857142857142856	0	0.027027	0.0958466	0.0656934	0.0930233	0	0.025641	0.0744681	0.043478260869565216	0.0714286	0	0.0819672	0.0794979	0.0666667	0.041666666666666664	0	0.024390243902439025	0.0810811	0	0	0	0.0730337	0.11538461538461539	0.0212766	0.047619047619047616	0.0924092	0
3D Stromal Cell Type - hMSC (12)	0.015267175572519083	0.0357143	0.0769231	0.0333333	0	0	0.21052631578947367	0	0	0	0	0	0	0	0	0	0	0.0353698	0	0.045454545454545456	0.0333333	0	0	0	0.038338658146964855	0.0578512	0.0857143	0.018867924528301886	0	0.0779221	0.08	0.0769231	0	0.0857143	0.043478260869565216	0.010752688172043012	0	0	0	0	0	0	0	0.054878048780487805	0.020833333333333332	0	0	0.0398671	0
3D Stromal Cell Type - Specialised (11)	0.00763359	0.017857142857142856	0.0789474	0.034482758620689655	0.038461538461538464	0.08	0	0.05	0	0	0.0555556	0	0	0	0	0	0	0.0321543	0	0.0315315	0.0701754	0	0	0	0.0351438	0.049586776859504134	0.0714286	0.019230769230769232	0	0.0379747	0	0.0789474	0	0.0366972	0.034632	0.0333333	0.0333333	0	0	0	0.0666667	0	0	0.0361446	0.031914893617021274	0.0740741	0	0.036544850498338874	0
3D Stromal Cell Type - hiPSC-CF (8)	0.015748031496062992	0.018867924528301886	0.027027	0	0.043478260869565216	0.0909091	0	0	0	0	0	0	0	0	0	0	0	0.022508038585209004	0	0.0272727	0	0	0.058823529411764705	0	0.022292993630573247	0.0333333	0.043478260869565216	0	0.058823529411764705	0.025974025974025976	0.0204082	0.027027	0	0.018518518518518517	0.026087	0.011235955056179775	0.0769231	0.041666666666666664	0	0	0	0.18181818181818182	0	0.018072289156626505	0.044444444444444446	0	0	0.026578073089700997	0
3D Stromal Cell Type - hDF (7)	0.015873015873015872	0.019230769230769232	0.12121212121212122	0.04	0	0	0	0	0	0	0	0	0	0	0	0	0	0.0225806	0	0.022727272727272728	0.017857142857142856	0	0.0625	0	0.022364217252396165	0.0336134	0.0441176	0	0.0625	0.0540541	0	0.12121212121212122	0	0.0380952	0.026200873362445413	0.011363636363636364	0.038461538461538464	0	0	0	0.0909091	0	0	0.024390243902439025	0.0333333	0	0	0.023255813953488372	0
3D Stromal Cell Type - hFF (6)	0.040983606557377046	0	0	0	0	0	0	0	0	0	0	0	0	0	0	0	0	0.0160772	0	0.013574660633484163	0	0.0645161	0	0.0769231	0.019169329073482427	0.016666666666666666	0.014492753623188406	0.0212766	0	0.013157894736842105	0.0212766	0	0	0.0285714	0.0263158	0.047619047619047616	0	0	0	0	0	0	0	0.018292682926829267	0.010989	0	0.1111111111111111	0.019933554817275746	0
3D Stromal Cell Type - hiPSC-MC (3)	0	0	0	0	0	0	0	0	0	0	0	0	0	0	0	0	0	0.00967742	1	0.013761467889908258	0	0	0	0	0.00958466	0.0258621	0	0.0714286	0	0.0422535	0.0714286	0	0	0	0.013157894736842105	0	0	0	0.25	0	0	0	0	0.012345679012345678	0.011363636363636364	0	0	0.00996678	0
3D Stromal Cell Type - SMC (3)	0.0163934	0	0	0.047619047619047616	0	0	0	0	0	0	0	0	0	0	0	0	0	0.00967742	0	0.00913242	0.019230769230769232	0	0	0	0.00958466	0.00847458	0	0.022727272727272728	0	0	0	0	0	0	0.00434783	0	0	0	0	0.0833333	0	0	0	0.012345679012345678	0.011363636363636364	0	0	0.00996678	0
3D Endothelial Cell Type - Reported (33)	0.0921986	0.0821918	0.0327869	0.0196078	0.020833333333333332	0.020833333333333332	0	0.075	0	0	0	0	0	0.0263158	0.027027	0	0	0.10289389067524116	0.0909091	0.12053571428571429	0.0375	0	0.0487805	0	0.10191082802547771	0.0719424	0.031914893617021274	0.0714286	0.0487805	0.0721649	0.0869565	0.0327869	0	0.046511627906976744	0.0920502	0.0648148	0.0392157	0.0204082	0.097561	0.0487805	0.0555556	0	0	0.0837989	0.10185185185185185	0.0408163	0.021739130434782608	0.10963455149501661	0
3D Endothelial Cell Type - hiPSC-EC (16)	0.0538462	0.0163934	0.022222222222222223	0.029411764705882353	0	0	0	0	0	0	0	0	0	0.047619047619047616	0.05	0	0	0.0482315	0.1875	0.0540541	0.015384615384615385	0	0.0833333	0	0.0477707	0.0645161	0.012658227848101266	0.0943396	0.0833333	0.0740741	0.11538461538461539	0.022222222222222223	0	0.026087	0.0562771	0.0425532	0	0.03125	0.16666666666666666	0.04	0	0	0	0.047337278106508875	0.0515464	0	0	0.053156146179401995	0
3D Endothelial Cell Type - HUVEC (9)	0.0483871	0.057692307692307696	0	0	0	0	0	0	0	0	0	0	0	0	0	0	0	0.0290323	0	0.0365297	0.017241379310344827	0	0	0	0.028754	0	0	0	0	0	0	0	0	0.00909091	0.017167381974248927	0.0224719	0.0357143	0	0	0	0.0769231	0	0	0.030303030303030304	0.0326087	0	0	0.029900332225913623	0
3D Endothelial Cell Type - CMVEC (5)	0	0.0408163	0.029411764705882353	0	0	0	0	0.15384615384615385	0	0	0	0	0	0	0	0	0	0.016129032258064516	0	0.022935779816513763	0	0	0	0	0.0159744	0.00833333	0.014705882352941176	0	0	0.013333333333333334	0	0.029411764705882353	0	0.00943396	0.013043478260869565	0.011627906976744186	0	0	0	0.0714286	0	0	0	0.00606061	0.0224719	0.045454545454545456	0.0555556	0.016611295681063124	0
3D Endothelial Cell Type - Specialised (3)	0	0	0	0	0.0555556	0.0555556	0	0.0833333	0	0	0	0	0	0	0	0	0	0.00967742	0	0.00913242	0.019230769230769232	0	0	0	0.00958466	0.00847458	0.015151515151515152	0	0	0	0	0	0	0.00961538	0.00873362	0	0.045454545454545456	0	0	0	0.14285714285714285	0	0	0.00613497	0.011363636363636364	0.05	0	0.00996678	0
3D CM % Composition - Reported (150)	0.2374429223744292	0.0949721	0.11801242236024845	0.049689440993788817	0.031055900621118012	0.0573248	0.0522876	0.038961	0.038961	0.019230769230769232	0.025974025974025976	0.0193548	0.039735099337748346	0.04	0.026490066225165563	0.00653595	0.00653595	0.47435897435897434	0.02	0.40458015267175573	0.12359550561797752	0.0792683	0.0322581	0.0193548	0.4745222929936306	0.32338308457711445	0.22988505747126436	0.10344827586206896	0.0457516	0.24858757062146894	0.1566265060240964	0.11801242236024845	0	0.2663316582914573	0.45384615384615384	0.1958762886597938	0.0691824	0.0844156	0.0451613	0.038961	0.026490066225165563	0.013071895424836602	0	0.38222222222222224	0.17412935323383086	0.05	0.0580645	0.4738562091503268	0.0253165
3D CM % Composition - >74 (115)	0.21649484536082475	0.0662252	0.132812	0.0551181	0.031496062992125984	0.0650407	0.058823529411764705	0.016260162601626018	0.0504202	0.024793388429752067	0.0336134	0.025	0.042735042735042736	0.0431034	0.0169492	0.00847458	0.00847458	0.3665594855305466	0	0.3058823529411765	0.12244897959183673	0.0839695	0.041666666666666664	0.025	0.36741214057507987	0.3050847457627119	0.24305555555555555	0.0827586	0.059322033898305086	0.2483221476510067	0.15441176470588236	0.132812	0	0.2616279069767442	0.38306451612903225	0.19393939393939394	0.0714286	0.1092436974789916	0.00793651	0.016260162601626018	0.0169492	0.0169492	0	0.3269230769230769	0.12921348314606743	0.047244094488188976	0.057377	0.35947712418300654	0.032520325203252036
3D CM % Composition - <75 (35)	0.0684932	0.0945946	0.031746031746031744	0.018867924528301886	0.02	0.02	0.022222222222222223	0.097561	0	0	0	0	0.024390243902439025	0.025	0.0526316	0	0	0.10932475884244373	0.0857143	0.12444444444444444	0.0493827	0.0333333	0	0	0.10828025477707007	0.0785714	0.0531915	0.084507	0	0.0707071	0.0694444	0.031746031746031744	0	0.0620155	0.0958333	0.0540541	0.0377358	0	0.14634146341463414	0.097561	0.0526316	0	0	0.10112359550561797	0.11009174311926606	0.0392157	0.0425532	0.11627906976744186	0
3D EC % Composition - Reported (150)	0.2374429223744292	0.0949721	0.11801242236024845	0.049689440993788817	0.031055900621118012	0.0573248	0.0522876	0.038961	0.038961	0.019230769230769232	0.025974025974025976	0.0193548	0.039735099337748346	0.04	0.026490066225165563	0.00653595	0.00653595	0.47435897435897434	0.02	0.40458015267175573	0.12359550561797752	0.0792683	0.0322581	0.0193548	0.4745222929936306	0.32338308457711445	0.22988505747126436	0.10344827586206896	0.0457516	0.24858757062146894	0.1566265060240964	0.11801242236024845	0	0.2663316582914573	0.45384615384615384	0.1958762886597938	0.0691824	0.0844156	0.0451613	0.038961	0.026490066225165563	0.013071895424836602	0	0.38222222222222224	0.17412935323383086	0.05	0.0580645	0.4738562091503268	0.0253165
3D EC % Composition - <10 (120)	0.19900497512437812	0.0709677	0.13636363636363635	0.061068702290076333	0.030303030303030304	0.0625	0.0650407	0.023622047244094488	0.0483871	0.023809523809523808	0.0322581	0.024	0.049586776859504134	0.0413223	0.0245902	0.00813008	0.00813008	0.38263665594855306	0	0.31007751937984496	0.13333333333333333	0.0970149	0.031746031746031744	0.024	0.38338658146964855	0.31843575418994413	0.25170068027210885	0.0945946	0.0483871	0.24836601307189543	0.14893617021276595	0.13636363636363635	0	0.26857142857142857	0.39759036144578314	0.1952662721893491	0.0687023	0.096	0.023255813953488372	0.04	0.016260162601626018	0.016260162601626018	0	0.3380952380952381	0.13812154696132597	0.045454545454545456	0.0634921	0.3758169934640523	0.03125
3D EC % Composition - >9 (30)	0.0863309	0.0857143	0.0169492	0	0.022222222222222223	0.022222222222222223	0	0.0810811	0	0	0	0	0	0.0285714	0.029411764705882353	0	0	0.0932476	0.1	0.11711711711711711	0.025641	0	0.025641	0	0.0923567	0.057971014492753624	0.032967	0.058823529411764705	0.025641	0.0631579	0.0746269	0.0169492	0	0.047619047619047616	0.0794979	0.046729	0.041666666666666664	0.021739130434782608	0.10526315789473684	0.025641	0.0606061	0	0	0.0852273	0.0943396	0.043478260869565216	0.023255813953488372	0.0996678	0
3D SC % Composition - Reported (150)	0.2374429223744292	0.0949721	0.11801242236024845	0.049689440993788817	0.031055900621118012	0.0573248	0.0522876	0.038961	0.038961	0.019230769230769232	0.025974025974025976	0.0193548	0.039735099337748346	0.04	0.026490066225165563	0.00653595	0.00653595	0.47435897435897434	0.02	0.40458015267175573	0.12359550561797752	0.0792683	0.0322581	0.0193548	0.4745222929936306	0.32338308457711445	0.22988505747126436	0.10344827586206896	0.0457516	0.24858757062146894	0.1566265060240964	0.11801242236024845	0	0.2663316582914573	0.45384615384615384	0.1958762886597938	0.0691824	0.0844156	0.0451613	0.038961	0.026490066225165563	0.013071895424836602	0	0.38222222222222224	0.17412935323383086	0.05	0.0580645	0.4738562091503268	0.0253165
3D SC % Composition - <25 (120)	0.21105527638190955	0.0641026	0.10294117647058823	0.045112781954887216	0.030303030303030304	0.0708661	0.056451612903225805	0.031746031746031744	0.0483871	0.023809523809523808	0.0322581	0.024	0.040983606557377046	0.05	0.0245902	0.00813008	0.00813008	0.38263665594855306	0.025	0.3359683794466403	0.1038961038961039	0.0808824	0.031746031746031744	0.024	0.37898089171974525	0.3111111111111111	0.22666666666666666	0.1095890410958904	0.0483871	0.24836601307189543	0.18248175182481752	0.10294117647058823	0	0.24719101123595505	0.392	0.18128654970760233	0.0687023	0.10483870967741936	0.03125	0.023622047244094488	0.0245902	0.016260162601626018	0	0.35096153846153844	0.13812154696132597	0.0615385	0.0387597	0.3848684210526316	0.03125
3D SC % Composition - >24 (30)	0.070922	0.10144927536231885	0.0909091	0.0425532	0.022222222222222223	0	0.025	0.0526316	0	0	0	0	0.027777777777777776	0	0.029411764705882353	0	0	0.0932476	0	0.092511	0.0810811	0.0363636	0.025641	0	0.0958466	0.0656934	0.0681818	0.0285714	0.025641	0.0631579	0.014084507042253521	0.0909091	0	0.0731707	0.0840336	0.0666667	0.041666666666666664	0	0.0769231	0.0810811	0.029411764705882353	0	0	0.0730337	0.0943396	0	0.1	0.0924092	0
3D Tissue Media - Reported (157)	0.25225225225225223	0.10326086956521739	0.1402439024390244	0.047619047619047616	0.0359281	0.0613497	0.037037037037037035	0.037267080745341616	0.037267080745341616	0.018404907975460124	0.024844720496894408	0.03125	0.025	0.0382166	0.0125	0	0.012578616352201259	0.4967948717948718	0.0191083	0.39925373134328357	0.15	0.0823529	0.030864197530864196	0.018518518518518517	0.4968152866242038	0.3448275862068966	0.26285714285714284	0.10555555555555556	0.030864197530864196	0.2459016393442623	0.13068181818181818	0.1402439024390244	0	0.25728155339805825	0.47509578544061304	0.2131979695431472	0.0727273	0.0807453	0.043209876543209874	0.037267080745341616	0.018867924528301886	0.0253165	0	0.388646	0.208955	0.0479042	0.042682926829268296	0.49673202614379086	0.011976047904191617
3D Tissue Media - RPMI-1640 (71)	0.19254658385093168	0	0.24691358024691357	0.0714286	0.023529411764705882	0.0609756	0.0379747	0	0.08	0	0	0.025974025974025976	0.04	0	0.013333333333333334	0	0.0273973	0.22903225806451613	0	0.18930041152263374	0.1308411214953271	0.0652174	0.038461538461538464	0.025974025974025976	0.2268370607028754	0.272109	0.33663366336633666	0.0272727	0.038461538461538464	0.21367521367521367	0.046296296296296294	0.24691358024691357	0	0.2536231884057971	0.2777777777777778	0.2047244094488189	0.045977	0.011494252873563218	0	0.038461538461538464	0	0.027027	0	0.30337078651685395	0.11347517730496454	0.011363636363636364	0	0.23588039867109634	0.012195121951219513
3D Tissue Media - B27 (67)	0.19745222929936307	0.00892857	0.2125	0.075	0.024691358024691357	0.0506329	0.04	0	0.084507	0	0	0.013513513513513514	0.0136986	0	0	0	0.028985507246376812	0.2161290322580645	0	0.19246861924686193	0.10377358490566038	0.0681818	0.0405405	0.013513513513513514	0.21405750798722045	0.24489795918367346	0.28431372549019607	0.0283019	0.0547945	0.2	0.0582524	0.2125	0	0.2518518518518518	0.2553191489361702	0.1732283464566929	0.0357143	0.012048192771084338	0	0.0405405	0	0.014084507042253521	0	0.26666666666666666	0.11678832116788321	0.011904761904761904	0	0.22259136212624583	0.0128205
3D Tissue Media - DMEM (53)	0.0674847	0.0879121	0.0506329	0.0285714	0.014705882352941176	0.078125	0.0491803	0.0862069	0	0.0508475	0.0338983	0.0517241	0	0.11320754716981132	0	0	0	0.16346153846153846	0.037037037037037035	0.16810344827586207	0.0510204	0.0666667	0.016129032258064516	0.0338983	0.16560509554140126	0.18181818181818182	0.10377358490566038	0.1728395061728395	0.016129032258064516	0.18095238095238095	0.20253164556962025	0.0506329	0	0.0992908	0.18067226890756302	0.0629921	0.10606060606060606	0.1864406779661017	0.0655738	0.016129032258064516	0.017543859649122806	0.0545455	0	0.13227513227513227	0.0944882	0.109375	0.0806452	0.16447368421052633	0.015625
3D Tissue Media - iCell Maintenance Medium (12)	0.00757576	0.1836734693877551	0	0	0.037037037037037035	0	0	0	0	0	0.1111111111111111	0	0	0	0	0	0	0.0387097	0	0.045454545454545456	0.0333333	0	0	0	0.038338658146964855	0	0	0	0	0	0	0	0	0	0	0	0	0	0	0	0	0	0	0	0.13953488372093023	0	0	0.0398671	0
3D Tissue Media - High-glucose DMEM (7)	0.015873015873015872	0.019230769230769232	0.027777777777777776	0	0	0.0952381	0.058823529411764705	0.0625	0	0	0	0	0	0	0	0	0	0.0225806	0	0.022727272727272728	0.017857142857142856	0	0	0.0714286	0.022364217252396165	0.025	0.0441176	0	0	0.012987012987012988	0.020833333333333332	0.027777777777777776	0	0.018691588785046728	0.026200873362445413	0.011363636363636364	0.125	0	0	0	0	0.2	0	0.024390243902439025	0.010869565217391304	0.041666666666666664	0.05	0.023255813953488372	0
3D Tissue Media - MEM-Î± (6)	0.024193548387096774	0	0	0	0	0	0	0.0666667	0	0	0	0	0	0	0.1	0	0	0.0193548	0.125	0.0181818	0.037037037037037035	0	0	0	0.019169329073482427	0.00826446	0	0.0212766	0	0.013157894736842105	0.0212766	0	0	0.00934579	0.0263158	0.011494252873563218	0.0833333	0	0.125	0	0.2222222222222222	0	0	0.030864197530864196	0	0	0	0.019933554817275746	0
3D Tissue Media - EGM2 (6)	0.024193548387096774	0.04	0	0	0	0.047619047619047616	0	0	0	0	0	0	0	0	0	0	0	0.0193548	0	0.0228311	0.0181818	0	0	0	0.019169329073482427	0.016666666666666666	0.029411764705882353	0	0	0	0	0	0	0.018867924528301886	0.017391304347826087	0.011494252873563218	0	0.045454545454545456	0	0	0	0	0	0.018292682926829267	0.033707865168539325	0	0	0.019933554817275746	0
3D Tissue Media - Iscove (5)	0.0327869	0	0	0	0	0	0	0	0	0	0	0	0.0909091	0	0	0	0	0.016129032258064516	0	0.0045045	0.018518518518518517	0.10344827586206896	0	0	0.0159744	0.0168067	0.014705882352941176	0.021739130434782608	0	0	0	0	0	0.0190476	0.021929824561403508	0.0481928	0	0	0.0625	0.0714286	0	0	0	0.024691358024691357	0.011111111111111112	0	0	0.016611295681063124	0
3D Tissue Media - StemPro-34 (4)	0.016260162601626018	0.041666666666666664	0	0	0	0	0	0	0	0	0	0	0	0	0	0	0	0.012903225806451613	0	0.00452489	0.058823529411764705	0	0	0	0.012779552715654952	0	0	0	0	0	0	0	0	0	0.004329	0	0	0	0	0.0769231	0	0	0	0	0	0	0.125	0.00660066	0
3D Tissue Media - Specialised (4)	0.00806452	0.0204082	0	0	0	0.0526316	0	0	0	0	0.0909091	0	0	0	0	0	0	0.012903225806451613	0	0.0136986	0	0.0333333	0	0	0.012779552715654952	0.00840336	0.014925373134328358	0	0	0	0	0	0	0.00952381	0.00869565	0.011764705882352941	0	0	0	0	0	0	0	0.00609756	0.011235955056179775	0	0	0.013289036544850499	0.0666667
3D Tissue Media - Cor.4U (3)	0	0	0	0	0.1875	0	0	0	0	0	0	0	0	0	0	0	0	0.00967742	0	0.00913242	0.019230769230769232	0	0	0	0.00958466	0	0	0	0	0	0	0	0	0.00961538	0.00434783	0	0	0	0	0	0	0	0	0.00613497	0	0.05	0	0.00996678	0
3D Estimated Tissue Cell Density (10^6 cells/mL) Q1 <2.82 (40)	0.0878378	0.11688311688311688	0.0769231	0.0350877	0.037037037037037035	0.0566038	0	0.041666666666666664	0.0638298	0.020833333333333332	0.0212766	0	0	0	0.022727272727272728	0	0	0.12903225806451613	0	0.12663755458515283	0.0714286	0.046875	0.041666666666666664	0	0.12779552715654952	0.0833333	0.061224489795918366	0.0379747	0.0638298	0.0776699	0.0512821	0.0769231	0	0.0757576	0.0938776	0.0892857	0.0714286	0	0	0.0204082	0.0714286	0	0	0.1043956043956044	0.0956522	0.0740741	0.018867924528301886	0.1291390728476821	0.0196078
3D Estimated Tissue Cell Density (10^6 cells/mL) Q2 2.82 to 10.8 (40)	0.0805369	0.023809523809523808	0.16666666666666666	0.0350877	0.037037037037037035	0	0.0851064	0.0204082	0	0	0.043478260869565216	0.0666667	0	0.15	0	0	0	0.12179487179487179	0	0.10256410256410256	0.046511627906976744	0.11666666666666667	0.0638298	0.0212766	0.12420382165605096	0.16417910447761194	0.14285714285714285	0.0933333	0.041666666666666664	0.23333333333333334	0.17142857142857143	0.16666666666666666	0	0.12698412698412698	0.16017316017316016	0.0608696	0.0169492	0.2391304347826087	0.04	0.0204082	0	0	0	0.13559322033898305	0.0862069	0	0.058823529411764705	0.1254125412541254	0.0196078
3D Estimated Tissue Cell Density (10^6 cells/mL) Q3 >10.8 (40)	0.0952381	0.0617284	0.0606061	0.0535714	0	0.0566038	0.02	0	0.041666666666666664	0	0.0212766	0	0.11904761904761904	0	0.046511627906976744	0	0	0.12903225806451613	0.075	0.12173913043478261	0.0843373	0.0307692	0.0204082	0.043478260869565216	0.12779552715654952	0.15555555555555556	0.14285714285714285	0.0789474	0.041666666666666664	0.0882353	0.0649351	0.0606061	0	0.0923077	0.14042553191489363	0.1509433962264151	0.0526316	0.017857142857142856	0.0833333	0.0638298	0	0.046511627906976744	0	0.1686046511627907	0.0677966	0	0.018867924528301886	0.1254125412541254	0
3D Estimated Tissue Size (mm2) Q1 <0.28 (34)	0.0689655	0.0958904	0.12280701754385964	0.019230769230769232	0.0204082	0.0638298	0.046511627906976744	0.023255813953488372	0.023255813953488372	0.023809523809523808	0.024390243902439025	0.024390243902439025	0.025	0	0	0	0	0.10967741935483871	0	0.10526315789473684	0.0769231	0.0338983	0.047619047619047616	0	0.10862619808306709	0.11940298507462686	0.13953488372093023	0.027027	0.047619047619047616	0.12903225806451613	0.0704225	0.12280701754385964	0	0.0967742	0.10084033613445378	0.0740741	0.038461538461538464	0.02	0	0.023255813953488372	0.0263158	0	0	0.0833333	0.0909091	0	0.0909091	0.11295681063122924	0.045454545454545456
3D Estimated Tissue Size (mm2) Q2 0.28 to 4 (34)	0.0992908	0.0810811	0.0666667	0.019230769230769232	0.041666666666666664	0	0.022727272727272728	0	0.023255813953488372	0	0.024390243902439025	0	0.0789474	0	0.0263158	0	0	0.10610932475884244	0	0.10043668122270742	0.0909091	0.016666666666666666	0.023255813953488372	0.05	0.10862619808306709	0.0791367	0.0769231	0.027027	0.047619047619047616	0.0606061	0.0410959	0.0666667	0	0.0967742	0.0916667	0.10476190476190476	0.038461538461538464	0	0.022222222222222223	0.023255813953488372	0.0263158	0	0	0.11428571428571428	0.061946902654867256	0.0196078	0.043478260869565216	0.10197368421052631	0
3D Estimated Tissue Size (mm2) Q3 4 to 20 (33)	0.0694444	0.025974025974025976	0.125	0.04	0.020833333333333332	0.020833333333333332	0.0731707	0.023809523809523808	0.0487805	0	0.0512821	0.0512821	0.025641	0.0833333	0	0	0	0.1064516129032258	0	0.10087719298245613	0.0506329	0.0714286	0.0487805	0	0.10543130990415335	0.12030075187969924	0.11494252873563218	0.0714286	0.023809523809523808	0.14285714285714285	0.10294117647058823	0.125	0	0.0887097	0.125	0.0747664	0	0.19047619047619047	0.022727272727272728	0.0487805	0	0	0	0.1411764705882353	0.043859649122807015	0.0408163	0.021739130434782608	0.10963455149501661	0.022727272727272728
3D Estimated Tissue Size (mm2) Q3 >20 (32)	0.0774648	0.012987012987012988	0.0163934	0.0625	0	0.0909091	0.023809523809523808	0	0	0.0512821	0	0	0	0.0857143	0.027777777777777776	0.0285714	0.0285714	0.0996785	0.09375	0.1111111111111111	0.025	0.0727273	0	0	0.0987261	0.13846153846153847	0.0786517	0.13846153846153847	0.05	0.13186813186813187	0.1746031746031746	0.0163934	0	0.0983607	0.12554112554112554	0.045871559633027525	0.0833333	0.0652174	0.1	0.05	0.027777777777777776	0.0571429	0	0.10285714285714286	0.0727273	0.0638298	0	0.0990099	0.023255813953488372
CM Immunofluorescent Imaging (261)	0.37410071942446044	0.11231884057971014	0.10646387832699619	0.0687023	0.0374532	0.0492424	0.034220532319391636	0.038314176245210725	0.030418250950570342	0.030534351145038167	0.0189394	0.0306513	0.0268199	0.011363636363636364	0.019157088122605363	0.0153257	0.011450381679389313	0.8242811501597445	0.011494252873563218	0.5966666666666667	0.15613382899628253	0.0827068	0.038314176245210725	0.026717557251908396	0.8280254777070064	0.36594202898550726	0.20817843866171004	0.1348314606741573	0.0343511	0.22509225092250923	0.13059701492537312	0.10646387832699619	0	0.33455882352941174	0.6862068965517242	0.27037037037037037	0.0643939	0.045112781954887216	0.0380228	0.0343511	0.019157088122605363	0.011406844106463879	0	0.5179856115107914	0.23487544483985764	0.052830188679245285	0.041666666666666664	0.8187702265372169	0.0380228
Scanning Electron Microscopy (21)	0.0441176	0.0806452	0.0408163	0.025641	0.027777777777777776	0.0571429	0	0.0333333	0	0.0714286	0.0357143	0	0	0	0.04	0	0	0.0643087	0	0.081448	0.028985507246376812	0	0.0333333	0	0.0670927	0.0538462	0.0493827	0.0327869	0.0333333	0.045454545454545456	0.0327869	0.0408163	0	0.0603448	0.041841	0.03	0.025	0.027027	0	0	0	0	0	0.04	0.0918367	0	0	0.0592105	0
Transmission Electron Microscopy (62)	0.1509433962264151	0.0909091	0.0823529	0.08	0.04	0.0684932	0	0.0285714	0	0.028985507246376812	0.029411764705882353	0	0.029850746268656716	0.014925373134328358	0.046875	0.015384615384615385	0.03125	0.2	0.015625	0.14754098360655737	0.14285714285714285	0.0987654	0.043478260869565216	0.014492753623188406	0.19808306709265175	0.18666666666666668	0.10526315789473684	0.10638297872340426	0.0909091	0.1565217391304348	0.13043478260869565	0.0823529	0	0.20588235294117646	0.1885245901639344	0.0827068	0.012345679012345678	0.0533333	0.027777777777777776	0	0	0	0.016129032258064516	0.18617021276595744	0.12121212121212122	0.025641	0.027027	0.19801980198019803	0
Sarcomere/Cellular Alignment Analysis (67)	0.14634146341463414	0.0272727	0.10227272727272728	0.075	0.0375	0.0779221	0.0540541	0.0266667	0.0266667	0.0410959	0.0273973	0.013513513513513514	0.0422535	0.013888888888888888	0.014084507042253521	0	0	0.2161290322580645	0.029411764705882353	0.1825726141078838	0.0833333	0.0804598	0.0405405	0.056338028169014086	0.21405750798722045	0.22	0.16964285714285715	0.10101010101010101	0.0547945	0.1694915254237288	0.12371134020618557	0.10227272727272728	0	0.14965986394557823	0.22406639004149378	0.164062	0.0740741	0.012048192771084338	0.039473684210526314	0.0266667	0.0285714	0.014084507042253521	0.014925373134328358	0.2192513368983957	0.0851064	0.0759494	0.0253165	0.2145214521452145	0.0533333
Sarcomere Length (um) Q1 <1.7 (19)	0.0526316	0.031746031746031744	0.0888889	0.027027	0.0606061	0.0606061	0	0	0.0357143	0	0	0	0.04	0	0	0.045454545454545456	0.045454545454545456	0.0612903	0	0.0533333	0.0615385	0.0697674	0	0	0.0607029	0.0714286	0.0921053	0.016666666666666666	0.0357143	0.0714286	0.0338983	0.0888889	0	0.0431034	0.060085836909871244	0.0744681	0.0263158	0.0285714	0.0333333	0	0	0.043478260869565216	0	0.0714286	0.029411764705882353	0.027777777777777776	0	0.059602649006622516	0.0689655
Sarcomere Length (um) - Mature Q2 1.7 to 1.9 (28)	0.0955882	0.0136986	0.0545455	0.11904761904761904	0.023255813953488372	0.0731707	0	0	0.027027	0	0.0285714	0.0285714	0.029411764705882353	0	0	0	0	0.0903226	0	0.0649351	0.0985915	0.0784314	0.0555556	0	0.0894569	0.0909091	0.0697674	0.0447761	0.0857143	0.042105263157894736	0.014492753623188406	0.0545455	0	0.092437	0.10344827586206896	0.1	0	0	0.0526316	0.027027	0	0	0	0.10526315789473684	0.0654206	0	0.024390243902439025	0.089404	0.025641
Sarcomere Length (um) Q3 >1.9 (17)	0.045454545454545456	0.016129032258064516	0.0681818	0.058823529411764705	0	0.03125	0.037037037037037035	0.038461538461538464	0	0	0	0	0.043478260869565216	0	0.047619047619047616	0.05	0.05	0.054838709677419356	0	0.044444444444444446	0.0307692	0.0731707	0.038461538461538464	0.041666666666666664	0.054313099041533544	0.0555556	0.0519481	0.0350877	0.038461538461538464	0.060240963855421686	0.0350877	0.0681818	0	0.0625	0.0652174	0.042105263157894736	0.0571429	0.030303030303030304	0.0740741	0.038461538461538464	0	0.047619047619047616	0.058823529411764705	0.0595238	0.0510204	0.029411764705882353	0.0333333	0.0564784	0
T-tubules Observed (18)	0.0530303	0.015873015873015872	0.043478260869565216	0.0882353	0.030303030303030304	0.0625	0	0.037037037037037035	0	0.038461538461538464	0	0	0.041666666666666664	0	0.0952381	0.047619047619047616	0	0.0580645	0	0.0305677	0.0793651	0.097561	0.0769231	0	0.057508	0.072	0.0379747	0.0526316	0.12	0.0595238	0.0526316	0.043478260869565216	0	0.0714286	0.0742358	0.0638298	0.0555556	0.0606061	0.034482758620689655	0	0	0.045454545454545456	0	0.0718563	0.029703	0	0.0322581	0.056291390728476824	0
Contractile Analysis Method - Reported(163)	0.24561403508771928	0.10582010582010581	0.1488095238095238	0.0520231	0.0346821	0.0591716	0.0357143	0.0359281	0.023668639053254437	0.023809523809523808	0.030120481927710843	0.0363636	0.030303030303030304	0.011976047904191617	0.012048192771084338	0.012121212121212121	0.018292682926829267	0.5160256410256411	0.018404907975460124	0.4163568773234201	0.14516129032258066	0.0734463	0.0297619	0.030120481927710843	0.5159235668789809	0.3349282296650718	0.24043715846994534	0.10215053763440861	0.0421687	0.24468085106382978	0.12021857923497267	0.1488095238095238	0.00613497	0.23255813953488372	0.4866920152091255	0.2760416666666667	0.0828402	0.0404624	0.041666666666666664	0.0359281	0.024390243902439025	0.024390243902439025	0	0.38461538461538464	0.18571428571428572	0.0647059	0.0535714	0.5163398692810458	0.035503
Contractile Analysis Method - Motion Tracking (88)	0.17415730337078653	0.10743801652892562	0.12380952380952381	0.038834951456310676	0.04	0.050505050505050504	0.020618556701030927	0.0652174	0.010309278350515464	0.031914893617021274	0.0212766	0.0322581	0	0.010752688172043012	0	0.022222222222222223	0.022222222222222223	0.2797427652733119	0	0.2697095435684647	0.11290322580645161	0.036036036036036036	0.020833333333333332	0.0212766	0.2770700636942675	0.2	0.16030534351145037	0.0833333	0.031578947368421054	0.17777777777777778	0.092437	0.12380952380952381	0.011363636363636364	0.1242603550295858	0.2589641434262948	0.22302158273381295	0.10204081632653061	0.00961538	0.010101010101010102	0.020833333333333332	0.0449438	0.021978	0	0.2028985507246377	0.16	0.0707071	0.0625	0.2838283828382838	0.041666666666666664
Contractile Analysis Method - Post Deflection (39)	0.0958904	0.0897436	0.13114754098360656	0.0545455	0.018518518518518517	0	0.0204082	0	0	0	0.044444444444444446	0.044444444444444446	0.0952381	0.022727272727272728	0.023255813953488372	0	0	0.12218649517684887	0	0.0982906	0.0853659	0.0645161	0.0652174	0.044444444444444446	0.12460063897763578	0.11510791366906475	0.0957447	0.038461538461538464	0.0888889	0.1111111111111111	0.0519481	0.13114754098360656	0	0.11904761904761904	0.13617021276595745	0.1	0.017241379310344827	0.12	0.0625	0.0425532	0	0	0	0.12994350282485875	0.0775862	0	0.06	0.12211221122112212	0.0408163
Contractile Analysis Method - Force Transducer (26)	0.0425532	0	0.0566038	0.0714286	0.024390243902439025	0.0769231	0.0571429	0	0.0909091	0.029411764705882353	0	0	0.03125	0	0.0333333	0	0.034482758620689655	0.083871	0.11538461538461539	0.0844444	0.0704225	0.0392157	0	0	0.0830671	0.12698412698412698	0.1111111111111111	0.11475409836065574	0	0.10227272727272728	0.0967742	0.0566038	0	0.0756303	0.0995671	0.0693069	0.0697674	0	0.0857143	0.058823529411764705	0	0.0689655	0	0.10650887573964497	0.046729	0.047619047619047616	0	0.0827815	0
Contractile Analysis Method - TFM (8)	0.015748031496062992	0	0.0555556	0	0	0.043478260869565216	0.11764705882352941	0	0	0	0.0666667	0.0666667	0	0	0	0	0	0.025806451612903226	0	0.018018018018018018	0.017543859649122806	0.09375	0	0	0.025559105431309903	0.0333333	0.058823529411764705	0	0	0.039473684210526314	0.041666666666666664	0.0555556	0	0.0377358	0.0305677	0.034482758620689655	0	0	0	0	0	0	0	0.0368098	0.021739130434782608	0	0	0.026578073089700997	0
Contractile Analysis Method - Specialised (6)	0.032520325203252036	0	0	0	0	0.047619047619047616	0.0625	0	0	0	0	0	0	0	0	0	0	0.0193548	0	0.0181818	0.0181818	0	0	0.0769231	0.019169329073482427	0.025210084033613446	0.0447761	0	0	0.013157894736842105	0.0212766	0	0	0.038461538461538464	0.021834061135371178	0.023255813953488372	0	0	0	0	0	0	0	0.024539877300613498	0	0.0909091	0	0.019933554817275746	0
Calcium Handling Analysis Method - Reported (124)	0.26288659793814434	0.0967742	0.1323529411764706	0.075188	0.021897810218978103	0.0606061	0.030534351145038167	0.022900763358778626	0.0387597	0.00757576	0.03125	0.023255813953488372	0.015503875968992248	0	0.015748031496062992	0.015873015873015872	0.015873015873015872	0.3954983922829582	0	0.3103448275862069	0.11538461538461539	0.10218978102189781	0.0551181	0.03125	0.3961661341853035	0.24352331606217617	0.189873	0.0641026	0.0551181	0.16766467065868262	0.0709677	0.1323529411764706	0	0.21505376344086022	0.3643410852713178	0.24848484848484848	0.051094890510948905	0.029197080291970802	0.022556390977443608	0.015151515151515152	0.015748031496062992	0.023809523809523808	0.00806452	0.35714285714285715	0.14754098360655737	0.0518519	0.029850746268656716	0.3980263157894737	0.0381679
Calcium Handling Analysis Method - Dye (99)	0.26436781609195403	0.0984848	0.0487805	0.0727273	0.026785714285714284	0.0747664	0.0377358	0.018691588785046728	0.0283019	0.00934579	0.038834951456310676	0.0190476	0.019230769230769232	0	0.0196078	0.019801980198019802	0.019801980198019802	0.3193548387096774	0	0.24313725490196078	0.1037037037037037	0.11504424778761062	0.0582524	0.038834951456310676	0.31629392971246006	0.1813186813186813	0.12413793103448276	0.0601504	0.0686275	0.1038961038961039	0.0846154	0.0487805	0	0.20359281437125748	0.2874015748031496	0.1830065359477124	0.0530973	0.0265487	0.027777777777777776	0.018691588785046728	0.00970874	0.029703	0	0.27450980392156865	0.14906832298136646	0.044642857142857144	0.0272727	0.3157894736842105	0.0471698
Calcium Handling Analysis Method - Genetical (23)	0.0285714	0.029850746268656716	0.2926829268292683	0.024390243902439025	0	0	0	0.03125	0.0645161	0	0	0.0333333	0	0	0	0	0	0.0707395	0	0.0807175	0.0428571	0.0204082	0.03125	0	0.0734824	0.112	0.17567567567567569	0.015625	0	0.14634146341463414	0	0.2926829268292683	0	0.0504202	0.0865801	0.14130434782608695	0.023809523809523808	0.025641	0	0	0.037037037037037035	0	0	0.10843373493975904	0.0380952	0	0.027777777777777776	0.076412	0
Calcium Handling Analysis Method - Specialised (3)	0.0163934	0	0	0.047619047619047616	0	0	0	0	0	0	0	0	0	0	0	0	0	0.00967742	0	0.00913242	0.019230769230769232	0	0	0	0.00958466	0.00847458	0	0.022727272727272728	0	0	0	0	0	0.00961538	0.00873362	0	0	0	0	0	0	0	0.3333333333333333	0.00613497	0	0.10526315789473684	0	0.00996678	0
Electrophysiology Analysis Method - Reported (117)	0.21428571428571427	0.13194444444444445	0.0888889	0.046153846153846156	0.064	0.031007751937984496	0.00787402	0.040983606557377046	0.032520325203252036	0.024390243902439025	0.0330579	0.0245902	0.0420168	0.0336134	0.0338983	0.00833333	0.0168067	0.3729903536977492	0.025641	0.28846153846153844	0.0986842	0.0992366	0.0762712	0.0330579	0.36942675159235666	0.21354166666666666	0.10365853658536585	0.11188811188811189	0.0672269	0.189873	0.14388489208633093	0.0888889	0	0.16489361702127658	0.3018867924528302	0.17751479289940827	0.0620155	0.072	0.0661157	0.024193548387096774	0.00826446	0.025210084033613446	0	0.24663677130044842	0.16666666666666666	0.030534351145038167	0.056451612903225805	0.34838709677419355	0.0403226
Electrophysiology Analysis Method - Patch Clamp (55)	0.16556291390728478	0.0744681	0.0897436	0.027777777777777776	0.0597015	0.014285714285714285	0	0.015625	0.015625	0	0.0327869	0.0327869	0.0508475	0.0338983	0.0169492	0	0.017241379310344827	0.1774193548387097	0.017543859649122806	0.128099	0.0824742	0.10810810810810811	0.1016949152542373	0.0327869	0.1757188498402556	0.11038961038961038	0.0720721	0.0659341	0.0483871	0.125	0.0777778	0.0897436	0	0.11347517730496454	0.1646090534979424	0.096	0.041666666666666664	0.0909091	0.0634921	0.0483871	0	0.0169492	0	0.14285714285714285	0.101562	0.0428571	0.045454545454545456	0.16339869281045752	0.0307692
Electrophysiology Analysis Method - Optical Mapping (39)	0.0958904	0.0897436	0.045454545454545456	0	0.018518518518518517	0.0377358	0	0.020833333333333332	0.0652174	0.0212766	0.044444444444444446	0.0681818	0.045454545454545456	0.022727272727272728	0.023255813953488372	0	0.023809523809523808	0.12218649517684887	0	0.11255411255411256	0.0348837	0.0645161	0.0652174	0.044444444444444446	0.12101910828025478	0.0763889	0.0510204	0.038461538461538464	0.0652174	0.0679612	0.0657895	0.045454545454545456	0	0.0681818	0.0987654	0.11009174311926606	0.0535714	0.0181818	0.02	0	0.023255813953488372	0.047619047619047616	0	0.11731843575418995	0.0775862	0	0.06	0.11842105263157894	0.0408163
Electrophysiology Analysis Method - Microelectrode (29)	0.048951	0.0714286	0.0535714	0.0909091	0.0714286	0.022727272727272728	0	0.11428571428571428	0	0.0555556	0	0	0	0.029411764705882353	0.0625	0.03125	0	0.0935484	0	0.0881057	0.0533333	0.0769231	0.0263158	0	0.0926518	0.0820896	0.0449438	0.0757576	0.0540541	0.0752688	0.0597015	0.0535714	0	0.048	0.0889831	0.11	0.0425532	0.0697674	0.0512821	0	0	0	0	0.061452513966480445	0.0648148	0.021739130434782608	0.0487805	0.0927152	0.025
Electrophysiology Analysis Method - Motion-Contrast Reconstruction (4)	0.00806452	0.0204082	0	0	0	0	0	0	0	0	0	0	0	0	0	0	0	0.012903225806451613	0.4	0.0183486	0	0	0	0	0.012779552715654952	0.025641	0.014925373134328358	0.045454545454545456	0	0.041666666666666664	0.0697674	0	0	0.00952381	0.013100436681222707	0	0	0	0.14285714285714285	0	0	0	0	0.00609756	0.022727272727272728	0	0	0.00993377	0
Electrophysiology Analysis Method - Genetical (3)	0.00813008	0.020833333333333332	0.03125	0	0	0	0.0769231	0	0	0	0	0	0	0	0	0	0	0.00967742	0	0.00913242	0.019230769230769232	0	0	0	0.00958466	0.017094017094017096	0.0307692	0	0	0.0136986	0.022727272727272728	0.03125	0	0.019417475728155338	0.00873362	0	0	0	0	0	0	0	0	0.00613497	0.022988505747126436	0	0	0.00996678	0
Metabolic Analysis Method - Reported (45)	0.12162162162162163	0.0340909	0.10294117647058823	0.0847458	0	0.0338983	0.0181818	0.018518518518518517	0.057692307692307696	0.018867924528301886	0	0.0816327	0	0.02	0.0204082	0	0.0652174	0.14516129032258066	0	0.0912863	0.15853658536585366	0.1076923076923077	0.057692307692307696	0	0.14376996805111822	0.14184397163120568	0.0792079	0.10126582278481013	0.0784314	0.13725490196078433	0.0875	0.10294117647058823	0	0.148438	0.17672413793103448	0.10434782608695652	0.1016949152542373	0.0333333	0.0363636	0	0	0.041666666666666664	0.022222222222222223	0.17045454545454544	0.056451612903225805	0.0862069	0.017241379310344827	0.14950166112956811	0.017857142857142856
Metabolic Analysis Method - Seahorse (35)	0.0758621	0.0253165	0.1206896551724138	0.08	0	0.0408163	0.022222222222222223	0.022727272727272728	0.046511627906976744	0.023255813953488372	0	0.10256410256410256	0	0.025	0.025641	0	0.0833333	0.11290322580645161	0	0.058577405857740586	0.1643835616438356	0.10714285714285714	0.0714286	0	0.11182108626198083	0.13533834586466165	0.076087	0.1	0.097561	0.15217391304347827	0.1	0.1206896551724138	0	0.096	0.14347826086956522	0.10377358490566038	0.12244897959183673	0.04	0.044444444444444446	0	0	0.0526316	0.0285714	0.1329479768786127	0.0521739	0.06	0.020833333333333332	0.11627906976744186	0.021739130434782608
Metabolic Analysis Method - Specialised (8)	0.0403226	0.018867924528301886	0	0	0	0	0	0	0.058823529411764705	0	0	0	0	0	0.0833333	0	0	0.025806451612903226	0	0.0272727	0.017543859649122806	0.029411764705882353	0	0	0.025559105431309903	0.00813008	0.014084507042253521	0	0	0	0	0	0	0.047619047619047616	0.026087	0.011235955056179775	0	0	0	0	0	0	0	0.0368098	0.010752688172043012	0.04	0	0.026578073089700997	0
Metabolic Analysis Method - Mitochondrial (4)	0.0245902	0	0	0.045454545454545456	0	0	0	0	0	0	0	0	0	0	0	0	0	0.012903225806451613	0	0.0183486	0	0	0	0	0.012779552715654952	0.0169492	0.014925373134328358	0.022222222222222223	0	0	0	0	0	0.0392157	0.017543859649122806	0	0	0	0	0	0	0	0	0.018518518518518517	0	0.047619047619047616	0	0.013289036544850499	0
Gene Analysis Method - Reported (167)	0.3150684931506849	0.0867347	0.11299435028248588	0.0689655	0.016666666666666666	0.0639535	0.011363636363636364	0.041176470588235294	0.0350877	0.023255813953488372	0.011560693641618497	0.041666666666666664	0.029585798816568046	0.023668639053254437	0.0177515	0.017857142857142856	0.023952095808383235	0.5239616613418531	0.017964071856287425	0.3508771929824561	0.19889502762430938	0.0960452	0.047337278106508875	0.029411764705882353	0.5286624203821656	0.3286384976525822	0.19072164948453607	0.14207650273224043	0.041176470588235294	0.21428571428571427	0.12365591397849462	0.11299435028248588	0.00598802	0.2995169082125604	0.5612648221343873	0.27692307692307694	0.0685714	0.0635838	0.0467836	0.029069767441860465	0.00584795	0.029940119760479042	0.00598802	0.40772532188841204	0.16055045871559634	0.0632184	0.0584795	0.5244299674267101	0.028735632183908046
Gene Analysis Method - PCR (131)	0.2923076923076923	0.059880239520958084	0.0805369	0.0791367	0.020833333333333332	0.05	0.0070922	0.0522388	0.044444444444444446	0.029411764705882353	0.00724638	0.0296296	0.029850746268656716	0.022388059701492536	0.022556390977443608	0.022727272727272728	0.030534351145038167	0.40894568690095845	0.015151515151515152	0.3169811320754717	0.16774193548387098	0.0896552	0.0367647	0.014598540145985401	0.4140127388535032	0.27979274611398963	0.16071428571428573	0.1456953642384106	0.0367647	0.1676300578034682	0.10897435897435898	0.0805369	0.00763359	0.25268817204301075	0.4534412955465587	0.2529411764705882	0.070922	0.0571429	0.043795620437956206	0.021739130434782608	0.00740741	0.030303030303030304	0.00763359	0.35185185185185186	0.11282051282051282	0.0719424	0.0740741	0.4163934426229508	0.036231884057971016
Gene Analysis Method - RNA (57)	0.14838709677419354	0.061855670103092786	0.14473684210526316	0.0555556	0	0.0428571	0.014925373134328358	0	0.0307692	0.015384615384615385	0.015625	0.1016949152542373	0.015873015873015872	0.016129032258064516	0.0163934	0.016666666666666666	0	0.18387096774193548	0.0169492	0.0912698	0.18888888888888888	0.13513513513513514	0.046875	0.0655738	0.18210862619808307	0.17687074829931973	0.11009174311926606	0.11235955056179775	0.0634921	0.18518518518518517	0.11235955056179775	0.14473684210526316	0	0.16058394160583941	0.21794871794871795	0.16806722689075632	0.0547945	0.0422535	0.045454545454545456	0.046875	0.0163934	0.0163934	0.017543859649122806	0.17204301075268819	0.1	0.041666666666666664	0.0441176	0.18151815181518152	0.029850746268656716
Gene Analysis Method - Specialised (6)	0.024193548387096774	0.0196078	0	0	0	0.047619047619047616	0	0	0	0	0	0	0	0	0	0	0.1111111111111111	0.0193548	0	0.0181818	0.0181818	0	0.0666667	0	0.019169329073482427	0.00826446	0.014492753623188406	0	0	0	0	0	0	0.038461538461538464	0.021834061135371178	0	0.04	0	0	0	0	0.1	0	0.018292682926829267	0.022222222222222223	0.043478260869565216	0	0.019933554817275746	0
Measured Fatty Acid Metabolism (18)	0.0373134	0	0.0909091	0.0571429	0	0.0625	0.0357143	0	0	0	0	0.13043478260869565	0	0.043478260869565216	0.045454545454545456	0	0.047619047619047616	0.0580645	0	0.0305677	0.13333333333333333	0.046511627906976744	0.037037037037037035	0	0.057508	0.072	0.0649351	0.034482758620689655	0.0769231	0.0853659	0.0526316	0.0909091	0	0.0909091	0.0789474	0.0638298	0.027027	0.029411764705882353	0.034482758620689655	0	0	0	0	0.0981595	0.00970874	0	0	0.059800664451827246	0.034482758620689655
Pharmacological Interventions - Reported (141)	0.2300469483568075	0.1761006289308176	0.0822785	0.038961	0.0753425	0.039735099337748346	0.027027	0.041379310344827586	0.0202703	0.0273973	0.027586206896551724	0.0205479	0.027777777777777776	0.035211267605633804	0.00689655	0.0211268	0.013986013986013986	0.44551282051282054	0	0.34962406015037595	0.13690476190476192	0.083871	0.041379310344827586	0.041958	0.4504792332268371	0.24757281553398058	0.16477272727272727	0.0958084	0.041379310344827586	0.1977401129943503	0.12962962962962962	0.0822785	0.0070922	0.18536585365853658	0.37174721189591076	0.1989247311827957	0.0662252	0.0896552	0.0408163	0.027210884353741496	0.00689655	0.028169014084507043	0.0070922	0.296137	0.22702702702702704	0.052980132450331126	0.0333333	0.430421	0.026845637583892617
Pharmacological Interventions - Isoproterenol (70)	0.15060240963855423	0.10476190476190476	0.0869565	0.047058823529411764	0.0617284	0.0487805	0.0253165	0.038961	0.025641	0.025974025974025976	0.0263158	0.0263158	0.0547945	0.027027	0	0.027777777777777776	0.0136986	0.22186495176848875	0	0.1950207468879668	0.0810811	0.0898876	0.038961	0.04	0.22364217252396165	0.17721518987341772	0.15517241379310345	0.046729	0.0666667	0.13709677419354838	0.0873786	0.0869565	0	0.1390728476821192	0.22131147540983606	0.17829457364341086	0.097561	0.0609756	0.0379747	0.025641	0.013513513513513514	0.041666666666666664	0	0.203125	0.1223021582733813	0.0352941	0.037037037037037035	0.21639344262295082	0.0379747
Pharmacological Interventions - Verapamil (27)	0.034965	0.140625	0.11764705882352941	0.022222222222222223	0.10256410256410256	0.023809523809523808	0.027027	0.027777777777777776	0	0.0285714	0.0606061	0.029411764705882353	0	0.03125	0	0.0689655	0	0.0870968	0	0.0652174	0.0405405	0.08	0.0882353	0.0606061	0.086262	0.1	0.0833333	0.0615385	0.0571429	0.13953488372093023	0.0952381	0.11764705882352941	0	0.023809523809523808	0.0625	0.09	0.021739130434782608	0.047619047619047616	0	0	0	0.0322581	0	0.0502793	0.1188118811881188	0	0	0.0860927	0.0540541
Pharmacological Interventions - E4031 (22)	0.0592593	0.0625	0.0196078	0.025	0.0857143	0	0	0.10344827586206896	0.0322581	0.0333333	0.034482758620689655	0	0.0357143	0	0.038461538461538464	0	0	0.0709677	0	0.0666667	0.058823529411764705	0.0425532	0	0.034482758620689655	0.0702875	0.029850746268656716	0.011764705882352941	0.0322581	0.0322581	0.0333333	0.0322581	0.0196078	0	0.0333333	0.0638298	0.04	0.024390243902439025	0.0833333	0.0625	0.0322581	0	0	0	0.0764706	0.038461538461538464	0.025641	0.0285714	0.0695364	0
Pharmacological Interventions - Doxorubicin (17)	0.029850746268656716	0.10526315789473684	0.0681818	0	0.03125	0	0	0.038461538461538464	0	0	0.041666666666666664	0	0	0	0	0.05	0	0.054838709677419356	0	0.0633484	0.015151515151515152	0.023255813953488372	0	0.041666666666666664	0.054313099041533544	0.023076923076923078	0.038461538461538464	0	0	0.0352941	0	0.0681818	0	0.017094017094017096	0.0337553	0.0531915	0	0.030303030303030304	0	0	0	0	0	0.0348837	0.0957447	0	0.0333333	0.0564784	0.0357143
Pharmacological Interventions - Specialised (16)	0.0378788	0.0333333	0	0.029411764705882353	0.0322581	0.0666667	0	0	0.04	0.041666666666666664	0	0.043478260869565216	0	0.047619047619047616	0	0	0.0526316	0.0516129	0	0.04	0.0819672	0.023809523809523808	0	0.043478260869565216	0.051118210862619806	0.056	0.025641	0.0943396	0	0.0481928	0.0740741	0	0	0.017241379310344827	0.0517241	0.031578947368421054	0.058823529411764705	0.1	0.037037037037037035	0.04	0	0.05	0.0625	0.047337278106508875	0.02	0.0967742	0	0.0462046	0
Pharmacological Interventions - Epinephrine (10)	0.0396825	0.0566038	0	0	0	0	0	0	0	0	0.125	0	0	0	0	0	0	0.0322581	0	0.0316742	0.034482758620689655	0.027777777777777776	0	0	0.0319489	0.008	0.0136986	0	0	0	0	0	0	0.00900901	0.017094017094017096	0.022222222222222223	0	0.038461538461538464	0	0	0	0	0	0.00588235	0.0786517	0	0	0.029801324503311258	0.047619047619047616
Pharmacological Interventions - Lidocaine (7)	0.00787402	0.06	0.027777777777777776	0	0.0952381	0	0	0	0	0	0.0714286	0	0.0769231	0	0	0	0	0.0225806	0	0.00896861	0.0363636	0.030303030303030304	0	0.15384615384615385	0.022364217252396165	0.025	0.014285714285714285	0.020833333333333332	0.0625	0.04	0.0425532	0.027777777777777776	0	0.018691588785046728	0.012931	0.011363636363636364	0	0	0	0	0	0	0	0.0181818	0.021978	0	0	0.019867549668874173	0
Pharmacological Interventions - Ranolazine (6)	0	0.0833333	0	0	0.1	0	0	0	0.0666667	0	0	0	0	0	0	0	0	0.0160772	0	0.013574660633484163	0.0181818	0.03125	0	0.0769231	0.019169329073482427	0.00826446	0	0.0212766	0	0.013157894736842105	0.0212766	0	0	0	0.00429185	0.011494252873563218	0	0	0	0	0	0	0	0.0060241	0.045454545454545456	0	0.0526316	0.019933554817275746	0
Pharmacological Interventions - Carbamylcholine (6)	0.024193548387096774	0	0	0.041666666666666664	0	0	0	0	0	0	0	0.0769231	0	0.0909091	0	0	0	0.0193548	0	0.0181818	0.0181818	0.03125	0	0	0.019169329073482427	0.025210084033613446	0	0.0666667	0	0.013157894736842105	0.0212766	0	0	0.018867924528301886	0.0263158	0.0352941	0	0.045454545454545456	0.058823529411764705	0	0	0	0	0.030864197530864196	0	0	0	0.016556291390728478	0
Pharmacological Interventions - Propranolol (5)	0.008	0.02	0	0.0909091	0	0.10526315789473684	0	0.0714286	0	0	0	0	0	0	0	0	0	0.016129032258064516	0	0.00904977	0.0377358	0	0.0714286	0	0.0159744	0.0168067	0	0	0.15384615384615385	0	0	0	0	0.0190476	0.017467248908296942	0.0357143	0.041666666666666664	0	0	0	0	0	0	0.018404907975460124	0.011111111111111112	0	0	0.013245033112582781	0
Pharmacological Interventions - Cisapride (5)	0.016129032258064516	0.0625	0	0	0	0	0	0	0	0	0	0	0	0	0	0	0	0.016129032258064516	0	0.0182648	0	0	0	0.0833333	0.0159744	0.0168067	0.014705882352941176	0.021739130434782608	0	0.013333333333333334	0.021739130434782608	0	0	0.0190476	0.00865801	0	0	0	0	0	0	0	0	0.00606061	0.045977	0	0	0.016611295681063124	0
Pharmacological Interventions - Blebbistatin (5)	0.008	0.02	0.029411764705882353	0	0	0	0.0666667	0	0	0	0	0	0	0.1	0	0	0	0.016129032258064516	0	0.0182648	0.018518518518518517	0	0	0	0.0159744	0.025423728813559324	0.029850746268656716	0.021739130434782608	0	0.0410959	0.044444444444444446	0.029411764705882353	0	0.0190476	0.017467248908296942	0.011627906976744186	0.041666666666666664	0.047619047619047616	0	0	0	0	0	0.00606061	0.045977	0	0	0.016611295681063124	0
Pharmacological Interventions - Metoprolol (5)	0.008	0.0625	0.029411764705882353	0	0.05	0	0	0	0	0	0	0	0	0	0	0	0	0.016129032258064516	0	0.013636363636363636	0.018518518518518517	0.0322581	0	0	0.0159744	0.00833333	0.014705882352941176	0	0	0.013333333333333334	0	0.029411764705882353	0	0.00943396	0.00865801	0.011627906976744186	0	0	0	0	0	0	0	0.012195121951219513	0.0340909	0	0	0.016611295681063124	0
Pharmacological Interventions - Caffeine (4)	0.0245902	0	0	0	0	0	0	0	0	0	0	0	0	0	0	0.14285714285714285	0	0.012903225806451613	0	0.00452489	0.018867924528301886	0	0.16666666666666666	0	0.012779552715654952	0	0	0	0	0	0	0	0	0.0291262	0.017543859649122806	0	0	0.05	0	0	0	0	0	0.018518518518518517	0	0.047619047619047616	0	0.013289036544850499	0
Pharmacological Interventions - Carbenoxolone (4)	0.00806452	0.0638298	0	0	0	0	0	0	0	0	0	0	0	0	0	0	0	0.012903225806451613	0	0.0183486	0	0	0	0	0.012779552715654952	0	0	0	0	0	0	0	0	0.00952381	0.004329	0	0	0	0	0	0	0	0	0.00609756	0.034482758620689655	0	0	0.013289036544850499	0
Pharmacological Interventions - T3 (3)	0.00813008	0	0	0.047619047619047616	0	0.0555556	0	0	0	0	0	0	0	0	0	0	0	0.00967742	0	0.00454545	0.019230769230769232	0	0	0.1	0.00958466	0.017094017094017096	0.015151515151515152	0.022727272727272728	0	0	0	0	0	0.00961538	0.013157894736842105	0.011904761904761904	0	0	0.0714286	0	0	0	0.3333333333333333	0.012345679012345678	0	0.05	0	0.00996678	0
Pharmacological Interventions - Phenylephrine (3)	0.00813008	0.020833333333333332	0	0.047619047619047616	0	0	0	0	0	0	0	0	0	0	0	0	0	0.00967742	0	0.00913242	0.019230769230769232	0	0	0	0.00958466	0.00847458	0	0.022727272727272728	0	0	0	0	0	0.00961538	0.00873362	0.011904761904761904	0	0	0.0714286	0	0	0	0	0.012345679012345678	0.011363636363636364	0	0	0.00996678	0
Pharmacological Interventions - Thalidomide (3)	0.00813008	0.020833333333333332	0.03125	0	0	0	0	0	0	0	0	0	0	0	0	0	0	0.00967742	0	0.00913242	0	0	0	0.1	0.00958466	0.0258621	0.0307692	0.022727272727272728	0	0.0422535	0.022727272727272728	0.03125	0.3333333333333333	0.019417475728155338	0.00873362	0	0	0	0	0	0	0	0	0.00613497	0.011363636363636364	0.05	0	0.00996678	0
Disease Modelling - Reported (50)	0.1958041958041958	0.0666667	0.0666667	0	0.015384615384615385	0.015384615384615385	0.0701754	0	0	0	0.0357143	0.0545455	0.0363636	0	0	0	0	0.16129032258064516	0	0.10743801652892562	0.14942528735632185	0.084507	0.0526316	0.0357143	0.1597444089456869	0.10666666666666667	0.11764705882352941	0.022222222222222223	0.034482758620689655	0.0900901	0.0697674	0.0666667	0	0.17829457364341086	0.1729957805907173	0.14782608695652175	0	0.015151515151515152	0.0333333	0.0526316	0	0	0	0.12834224598930483	0.10569105691056911	0.0625	0.0666667	0.15081967213114755	0
Disease Modelling - Genetic Disorders (23)	0.125	0.045454545454545456	0.019230769230769232	0	0.0263158	0	0.030303030303030304	0	0	0	0.0333333	0.0333333	0	0	0	0	0	0.0741935	0	0.0478261	0.0895522	0.0638298	0.1	0	0.0734824	0.022058823529411766	0.023529411764705882	0	0.03125	0.021739130434782608	0.031746031746031744	0.019230769230769232	0	0.0775862	0.0818966	0.0824742	0	0.025641	0.029411764705882353	0.0645161	0	0	0	0.0635838	0.0283019	0.0512821	0.0882353	0.0657895	0
Disease Modelling - Left Ventricular (15)	0.0542636	0.0338983	0.046511627906976744	0	0	0	0.13043478260869565	0	0	0	0.045454545454545456	0	0.047619047619047616	0	0	0	0	0.0483871	0	0.035555555555555556	0.0655738	0.05	0	0.045454545454545456	0.0479233	0.048	0.0675676	0	0.041666666666666664	0.075	0.0754717	0.046511627906976744	0	0.0540541	0.0474138	0.043010752688172046	0	0	0	0.041666666666666664	0	0	0	0.0352941	0.052083333333333336	0.0645161	0.0357143	0.046357615894039736	0
Disease Modelling - Arrhythmic (15)	0.0625	0.0517241	0.022727272727272728	0	0.0333333	0	0.04	0	0	0	0.045454545454545456	0.045454545454545456	0	0	0	0	0	0.0483871	0	0.035555555555555556	0.0655738	0.05	0.041666666666666664	0	0.0479233	0.0234375	0.025974025974025976	0	0.041666666666666664	0.023809523809523808	0.0363636	0.022727272727272728	0	0.035398230088495575	0.0474138	0.0659341	0	0.0322581	0	0	0	0	0	0.047619047619047616	0.030612244897959183	0.03125	0	0.039473684210526314	0
Disease Modelling - Myocardium (11)	0.03125	0.0555556	0.0512821	0	0	0.038461538461538464	0	0	0	0	0	0	0.058823529411764705	0	0	0	0	0.035483870967741936	0	0.026905829596412557	0.0701754	0.027027	0	0	0.0351438	0.040983606557377046	0.0714286	0	0	0.025	0	0.0512821	0	0.0660377	0.034632	0.021978	0	0	0.045454545454545456	0.05	0	0	0	0.0361446	0.043010752688172046	0	0	0.033112582781456956	0
Disease Modelling - Arrhythmogenic Cardiomyopathy (10)	0.0396825	0.037037037037037035	0.025641	0	0.04	0	0.05	0	0	0	0.058823529411764705	0	0	0	0	0	0	0.0322581	0	0.0224215	0.0714286	0	0.0526316	0	0.0319489	0.024390243902439025	0.027777777777777776	0	0.0526316	0.0253165	0.04	0.025641	0	0.027522935779816515	0.030303030303030304	0.045454545454545456	0	0	0	0	0	0	0	0.030120481927710843	0.0322581	0.037037037037037035	0	0.029801324503311258	0
Disease Modelling - Ischemic/Infarction (7)	0.015873015873015872	0.019230769230769232	0.027777777777777776	0	0	0.045454545454545456	0	0	0	0	0	0.15384615384615385	0	0	0	0	0	0.0225806	0	0.0180995	0.0555556	0	0	0	0.022364217252396165	0.0423729	0.0441176	0.0425532	0	0.012987012987012988	0	0.027777777777777776	0	0.0380952	0.026200873362445413	0.022988505747126436	0	0	0	0	0	0	0	0.024390243902439025	0.0333333	0	0	0.023255813953488372	0
Disease Modelling - HCM (6)	0.016	0	0.0285714	0	0	0	0.13333333333333333	0	0	0	0.0769231	0	0.0833333	0	0	0	0	0.0193548	0	0.0181818	0.0181818	0	0	0.0769231	0.019169329073482427	0.0338983	0.0447761	0	0.0666667	0.0547945	0.0666667	0.0285714	0	0.038461538461538464	0.0263158	0.023255813953488372	0	0	0	0	0	0	0	0.012121212121212121	0.045454545454545456	0	0	0.019933554817275746	0
Disease Modelling - DCM (5)	0.024390243902439025	0	0.029411764705882353	0	0	0	0.0666667	0	0	0	0	0	0	0	0	0	0	0.016129032258064516	0	0.00904977	0.018518518518518517	0.0666667	0	0	0.0159744	0.0168067	0.029850746268656716	0	0	0.027027	0.021739130434782608	0.029411764705882353	0	0.0190476	0.021929824561403508	0.023529411764705882	0	0	0	0.0714286	0	0	0	0.024691358024691357	0	0	0.0555556	0.016611295681063124	0
Disease Modelling - Acute Myocardial Infarction (4)	0.00806452	0.0204082	0.030303030303030304	0	0	0.0526316	0	0	0	0	0	0	0	0	0	0	0	0.012903225806451613	0	0.0136986	0.018867924528301886	0	0	0	0.012779552715654952	0.025641	0.046153846153846156	0	0	0.013513513513513514	0	0.030303030303030304	0	0.0291262	0.013100436681222707	0	0	0	0	0	0	0	0	0.018518518518518517	0.011235955056179775	0	0	0.013289036544850499	0
Disease Modelling - Metabolic Disorders (4)	0.0330579	0	0	0	0	0	0	0	0	0	0	0	0	0	0	0	0	0.012903225806451613	0	0.0136986	0	0.0333333	0	0	0.012779552715654952	0	0	0	0	0	0	0	0	0.019230769230769232	0.00869565	0	0	0	0	0	0	0	0	0.012269938650306749	0	0.1	0	0.013289036544850499	0
Disease Modelling - Long QT Syndrome (3)	0.0163934	0	0	0	0	0	0	0	0	0	0	0.1	0	0	0	0	0	0.00967742	0	0.00913242	0	0.034482758620689655	0	0	0.00958466	0	0	0	0	0	0	0	0	0.00961538	0.013157894736842105	0.024096385542168676	0	0	0	0	0	0	0	0.018633540372670808	0	0	0	0.00996678	0
Disease Modelling - Fibrotic (3)	0	0.0425532	0	0	0	0	0	0	0	0	0	0	0.1111111111111111	0	0	0	0	0.00967742	0	0	0.06	0	0	0	0.00958466	0.00847458	0.015151515151515152	0	0	0	0	0	0	0.00961538	0.00434783	0.011904761904761904	0	0	0.0714286	0.0833333	0	0	0	0	0.022988505747126436	0	0	0.00662252	0
Disease Modelling - Specialised (3)	0.0163934	0	0.03125	0	0	0	0	0	0	0	0	0	0	0	0	0	0	0.00967742	0	0.00913242	0	0	0	0.1	0.00958466	0.00847458	0.015151515151515152	0	0	0.0136986	0	0.03125	0	0.019417475728155338	0.013157894736842105	0.011904761904761904	0	0	0	0	0	0	0	0.00613497	0.011363636363636364	0	0.0625	0.00996678	0
Force (mN) - Reported (48)	0.12666666666666668	0.010752688172043012	0.0985915	0.0806452	0.015873015873015872	0.0491803	0.0727273	0	0	0.0363636	0.0181818	0.0181818	0.0784314	0.038461538461538464	0.0392157	0	0.04	0.15483870967741936	0	0.13191489361702127	0.0769231	0.0869565	0.0357143	0.037037037037037035	0.15335463258785942	0.19708029197080293	0.15463917525773196	0.097561	0.0740741	0.1553398058252427	0.125	0.0985915	0	0.18110236220472442	0.2	0.1111111111111111	0.030303030303030304	0.1206896551724138	0.0714286	0.0545455	0	0	0	0.1875	0.0551181	0.0645161	0.0508475	0.15946843853820597	0.0169492
Force (mN) - Q1 (13)	0.046875	0	0.10256410256410256	0.0322581	0	0.0357143	0	0	0	0	0	0	0.0526316	0	0	0	0.0625	0.041935483870967745	0	0.05	0.016129032258064516	0.025641	0	0	0.0415335	0.0487805	0.0694444	0	0.045454545454545456	0.05	0	0.10256410256410256	0	0.0550459	0.0570175	0.0674157	0	0	0.0869565	0.045454545454545456	0	0	0	0.0481928	0.020618556701030927	0	0.08	0.0431894	0.041666666666666664
Force (mN) - Q2 (12)	0.031007751937984496	0.017543859649122806	0.05	0	0.037037037037037035	0	0.15	0	0	0	0	0.0526316	0	0.058823529411764705	0	0	0.0666667	0.0387097	0	0.026785714285714284	0.0508475	0.0263158	0.047619047619047616	0.0526316	0.038338658146964855	0.0491803	0.0555556	0.038461538461538464	0	0.0779221	0.10204081632653061	0.05	0	0.045871559633027525	0.0526316	0.021739130434782608	0	0.20833333333333334	0	0	0	0	0	0.0613497	0.010309278350515464	0	0.04	0.0398671	0
Force (mN) - Q4 (12)	0.0390625	0	0	0.0333333	0	0.037037037037037035	0	0	0	0.05	0.0526316	0	0.1875	0.058823529411764705	0.0625	0	0	0.0387097	0	0.022222222222222223	0.0333333	0.11428571428571428	0	0.0526316	0.038338658146964855	0.0666667	0.0410959	0.058823529411764705	0.1	0.0375	0.058823529411764705	0	0	0.045871559633027525	0.048034934497816595	0.044444444444444446	0.0322581	0.0357143	0.0909091	0.1	0	0	0	0.048484848484848485	0.020833333333333332	0.0714286	0	0.0398671	0
Force (mN) - Q3 (11)	0.03125	0	0.025	0.1111111111111111	0	0.038461538461538464	0.047619047619047616	0	0	0.0526316	0	0	0	0	0.0666667	0	0	0.035483870967741936	0	0.0409091	0.016666666666666666	0	0.05	0	0.0351438	0.058333333333333334	0.041666666666666664	0.06	0.05	0.0379747	0.0392157	0.025	0	0.0660377	0.043668122270742356	0.010869565217391304	0.0333333	0.037037037037037035	0	0	0	0	0	0.0424242	0.021052631578947368	0.0740741	0	0.036544850498338874	0
Stress (mN/mm2) - Reported (37)	0.0533333	0.012195121951219513	0.15517241379310345	0.0566038	0.0392157	0.0816327	0.0212766	0	0.0681818	0.022222222222222223	0.046511627906976744	0.022727272727272728	0.0731707	0	0.024390243902439025	0	0	0.1157556270096463	0.0810811	0.1038961038961039	0.11538461538461539	0.015873015873015872	0.044444444444444446	0.022727272727272728	0.1182108626198083	0.16793893129770993	0.16091954022988506	0.0821918	0.044444444444444446	0.14893617021276595	0.0821918	0.15517241379310345	0	0.112	0.14224137931034483	0.12264150943396226	0.0555556	0	0.0888889	0.0681818	0	0.05	0	0.15789473684210525	0.0603448	0.0377358	0	0.11551155115511551	0
Stress (mN/mm2) - Q1 (10)	0.0234375	0	0.0810811	0.0357143	0	0.0833333	0.05	0	0.1111111111111111	0	0	0	0	0	0	0	0	0.0322581	0	0.0363636	0.0169492	0.027777777777777776	0	0	0.0319489	0.05	0.0724638	0.0196078	0	0.038461538461538464	0.0196078	0.0810811	0	0.037037037037037035	0.043859649122807015	0.0697674	0	0	0	0	0	0	0	0.0555556	0.010526315789473684	0	0	0.0332226	0
Stress (mN/mm2) - Q2 (9)	0.00775194	0	0.0263158	0.037037037037037035	0	0	0	0	0.0555556	0	0.0625	0	0	0	0	0	0	0.0257235	0.3333333333333333	0.031818181818181815	0.0350877	0	0	0	0.028754	0.041666666666666664	0.013888888888888888	0.0851064	0	0.0526316	0.0625	0.0263158	0	0.0183486	0.030434782608695653	0.011111111111111112	0	0	0.16666666666666666	0.0555556	0	0	0	0.036585365853658534	0.0326087	0	0	0.029900332225913623	0
Stress (mN/mm2) - Q3 (9)	0.023622047244094488	0.018518518518518517	0.11428571428571428	0.037037037037037035	0	0	0	0	0	0.058823529411764705	0	0.0625	0	0	0	0	0	0.0290323	0	0.0225225	0.0350877	0	0.11764705882352941	0	0.028754	0.041666666666666664	0.0428571	0.02	0.0555556	0.0666667	0.02	0.11428571428571428	0	0.027777777777777776	0.034934497816593885	0.0340909	0.0357143	0	0	0.0555556	0	0	0	0.030303030303030304	0.021505376344086023	0.038461538461538464	0	0.026490066225165563	0
Stress (mN/mm2) - Q4 (9)	0.00775194	0	0.0263158	0	0.0869565	0.0869565	0	0	0	0	0.0625	0	0.23076923076923078	0	0.0769231	0	0	0.0290323	0	0.017937219730941704	0.0727273	0	0	0.0625	0.028754	0.0504202	0.0735294	0	0.0555556	0.025641	0.02	0.0263158	0	0.0471698	0.034934497816593885	0.0340909	0.0740741	0	0.05	0.0555556	0	0.16666666666666666	0	0.0429448	0.010638297872340425	0.038461538461538464	0	0.026490066225165563	0
Upstroke Velocity (um/s) - Reported (40)	0.11805555555555555	0.023809523809523808	0.14754098360655737	0.017241379310344827	0	0.037037037037037035	0.02	0.0869565	0	0.020833333333333332	0	0.043478260869565216	0	0	0	0.023255813953488372	0.023255813953488372	0.12903225806451613	0	0.12173913043478261	0.0843373	0.0307692	0.041666666666666664	0.0212766	0.12779552715654952	0.1386861313868613	0.15555555555555556	0.0512821	0.0204082	0.14432989690721648	0.0649351	0.14754098360655737	0	0.0839695	0.16017316017316016	0.18446601941747573	0.0714286	0	0.04	0.041666666666666664	0.022727272727272728	0.022727272727272728	0	0.12290502793296089	0.058823529411764705	0.0357143	0.08	0.1291390728476821	0.061224489795918366
Upstroke Velocity (um/s) - Q3 (11)	0.0393701	0	0.0789474	0.034482758620689655	0	0	0	0.05	0	0	0	0	0	0	0	0.0714286	0	0.035483870967741936	0	0.0409091	0	0.027027	0.05	0	0.0351438	0.058333333333333334	0.056338028169014086	0.0392157	0.05	0.0649351	0.0392157	0.0789474	0	0.0366972	0.0482456	0.056818181818181816	0.0333333	0	0	0.05	0	0	0	0.0361446	0.010416666666666666	0.0357143	0.041666666666666664	0.036544850498338874	0.045454545454545456
Upstroke Velocity (um/s) - Q1 (10)	0.048	0.0181818	0.0526316	0	0	0.04	0.05	0	0	0	0	0	0	0	0	0	0	0.0322581	0	0.017857142857142856	0.0714286	0.027777777777777776	0	0.058823529411764705	0.0319489	0.0327869	0.0422535	0.0196078	0	0.0519481	0.04	0.0526316	0	0.0181818	0.039301310043668124	0.0697674	0.034482758620689655	0	0	0	0	0.0714286	0	0.023952095808383235	0.054945054945054944	0	0	0.0332226	0.047619047619047616
Upstroke Velocity (um/s) - Q2 (10)	0.0234375	0.0181818	0.025641	0	0	0	0	0.1111111111111111	0	0.0555556	0	0.125	0	0	0	0	0	0.0322581	0	0.0316742	0.034482758620689655	0	0.0526316	0	0.0319489	0.0327869	0.0422535	0.0196078	0	0.0253165	0.0196078	0.025641	0	0.00900901	0.034782608695652174	0.045454545454545456	0.0714286	0	0.047619047619047616	0	0.0714286	0	0	0.030120481927710843	0.010526315789473684	0.037037037037037035	0.043478260869565216	0.029801324503311258	0.047619047619047616
Upstroke Velocity (um/s) - Q4 (9)	0.023622047244094488	0	0.0833333	0	0	0.041666666666666664	0	0.0555556	0	0	0	0	0	0	0	0	0.0833333	0.0290323	0	0.0365297	0.017241379310344827	0	0	0	0.028754	0.0330579	0.057971014492753624	0	0	0.038961	0	0.0833333	0	0.037383177570093455	0.039473684210526314	0.045977	0	0	0.05	0.0555556	0	0	0	0.0429448	0	0	0.0952381	0.029900332225913623	0
Amplitude (F/F0) - Reported (50)	0.0961538	0.0666667	0.15942028985507245	0.078125	0	0.0819672	0.016666666666666666	0.034482758620689655	0.0169492	0	0.017543859649122806	0.0357143	0.0363636	0	0.0377358	0	0.018867924528301886	0.16129032258064516	0	0.12605042016806722	0.0989011	0.084507	0.0526316	0.0357143	0.1597444089456869	0.16901408450704225	0.17525773195876287	0.045454545454545456	0.0526316	0.12037037037037036	0.033707865168539325	0.15942028985507245	0	0.14285714285714285	0.17796610169491525	0.13793103448275862	0.029411764705882353	0	0.0508475	0.0169492	0	0.018518518518518517	0.02	0.17222222222222222	0.0967742	0.030303030303030304	0.015873015873015872	0.16225165562913907	0.0333333
Amplitude (F/F0) - Q1 (13)	0.022900763358778626	0.017241379310344827	0.10256410256410256	0.10344827586206896	0	0	0.043478260869565216	0	0	0	0.05	0.05	0.0526316	0	0.058823529411764705	0	0	0.041935483870967745	0	0.0176211	0.0862069	0.0526316	0.045454545454545456	0.05	0.0415335	0.0661157	0.0547945	0.0377358	0.0952381	0.0769231	0.0377358	0.10256410256410256	0	0.045454545454545456	0.0524017	0.0326087	0	0	0.0869565	0.045454545454545456	0	0	0.0769231	0.0481928	0.03125	0.0333333	0	0.0431894	0.041666666666666664
Amplitude (F/F0) - Q2 (13)	0.046875	0.017241379310344827	0.0487805	0.0666667	0	0.0357143	0	0.045454545454545456	0	0	0	0	0	0	0	0	0	0.041935483870967745	0	0.0405405	0.0327869	0.0526316	0	0	0.0415335	0.0487805	0.0547945	0.0377358	0	0.024390243902439025	0	0.0487805	0	0.0550459	0.0524017	0.0555556	0.03125	0	0	0	0	0	0	0.0609756	0.020618556701030927	0.0333333	0	0.0431894	0.041666666666666664
Amplitude (F/F0) - Q3 (12)	0.015267175572519083	0.0357143	0.10526315789473684	0	0	0.12	0	0.047619047619047616	0.047619047619047616	0	0	0	0	0	0	0	0	0.0387097	0	0.040724	0.0163934	0	0.047619047619047616	0.0526316	0.038338658146964855	0.0491803	0.0704225	0	0.047619047619047616	0.0506329	0.018867924528301886	0.10526315789473684	0	0.0363636	0.043478260869565216	0.044444444444444446	0.0322581	0	0.043478260869565216	0	0	0.0625	0	0.0359281	0.031578947368421054	0	0.04	0.0398671	0
Amplitude (F/F0) - Q4 (12)	0.031007751937984496	0.0357143	0.024390243902439025	0	0	0.037037037037037035	0	0	0	0	0	0.0526316	0.0555556	0	0.0625	0	0.0666667	0.0387097	0	0.036036036036036036	0.0163934	0.0540541	0.047619047619047616	0	0.038338658146964855	0.0322581	0.0555556	0	0	0.012195121951219513	0	0.024390243902439025	0	0.0363636	0.034482758620689655	0.044444444444444446	0	0	0	0	0	0	0	0.0421687	0.0425532	0	0	0.0364238	0
Beat Rate (beats per minute) - Reported (54)	0.10759493670886076	0.0869565	0.10526315789473684	0.057971014492753624	0.029411764705882353	0.0769231	0.0655738	0.0666667	0.0322581	0	0.0163934	0.0333333	0	0	0.017241379310344827	0	0.0357143	0.17419354838709677	0	0.13807531380753138	0.0833333	0.0945946	0.0491803	0.0508475	0.17252396166134185	0.14864864864864866	0.14563106796116504	0.043478260869565216	0.0491803	0.13636363636363635	0.0909091	0.10526315789473684	0	0.1223021582733813	0.189873	0.1623931623931624	0.1044776119402985	0.028985507246376812	0.03125	0.015873015873015872	0.0350877	0.0535714	0	0.1878453038674033	0.1111111111111111	0.0285714	0.014925373134328358	0.17549668874172186	0.03125
Beat Rate (beats per minute) - Q2 (16)	0.0538462	0.0163934	0.045454545454545456	0	0	0.0666667	0.08	0.0833333	0.04	0	0	0	0	0	0	0	0.0526316	0.0516129	0	0.0493274	0.015384615384615385	0.075	0	0.043478260869565216	0.051118210862619806	0.0393701	0.0666667	0	0	0.0481928	0.0357143	0.045454545454545456	0	0.0535714	0.0608696	0.031578947368421054	0.125	0	0.037037037037037035	0	0	0.16666666666666666	0	0.0662651	0.030303030303030304	0.030303030303030304	0.034482758620689655	0.053156146179401995	0
Beat Rate (beats per minute) - Q1 (15)	0.0381679	0.0517241	0.0714286	0.0625	0	0.0333333	0.04	0	0	0	0.045454545454545456	0	0	0	0	0	0	0.0483871	0	0.0495495	0.015625	0.024390243902439025	0.041666666666666664	0.045454545454545456	0.0479233	0.0650407	0.0675676	0.0363636	0.041666666666666664	0.0617284	0.0363636	0.0714286	0	0.035398230088495575	0.0474138	0.0777778	0.0606061	0	0.038461538461538464	0	0.0526316	0	0	0.0538922	0.0631579	0	0	0.0498339	0
Beat Rate (beats per minute) - Q4 (13)	0.022900763358778626	0.0350877	0.0487805	0.0322581	0.0740741	0	0.043478260869565216	0.0952381	0	0	0	0.10526315789473684	0	0	0.058823529411764705	0	0	0.041935483870967745	0	0.0266667	0.05	0.0526316	0.045454545454545456	0.05	0.0415335	0.0403226	0.0547945	0.018518518518518517	0	0.05	0.0377358	0.0487805	0	0.026785714285714284	0.0524017	0.0555556	0.03125	0.0714286	0	0.045454545454545456	0.058823529411764705	0	0	0.0545455	0.042105263157894736	0	0	0.0431894	0
Beat Rate (beats per minute) - Q3 (10)	0.015503875968992248	0.037037037037037035	0.025641	0.0357143	0	0.0833333	0	0	0.0526316	0	0	0	0	0	0	0	0.0769231	0.0322581	0	0.0224215	0.0526316	0.027777777777777776	0.0526316	0	0.0319489	0.0327869	0.0136986	0.0196078	0.1111111111111111	0.0253165	0.04	0.025641	0	0.037037037037037035	0.034782608695652174	0.045454545454545456	0	0	0	0	0	0	0	0.030120481927710843	0.010526315789473684	0.037037037037037035	0	0.029801324503311258	0.1
Time to Peak (ms) - Reported (41)	0.0945946	0.0740741	0.0597015	0.0909091	0	0.0961538	0.04	0	0.0408163	0	0.020833333333333332	0	0.0212766	0	0.045454545454545456	0	0.022727272727272728	0.13225806451612904	0	0.12608695652173912	0.045977	0.0967742	0.02	0.020833333333333332	0.13099041533546327	0.16296296296296298	0.15384615384615385	0.0779221	0.0408163	0.0769231	0.0506329	0.0597015	0	0.1532258064516129	0.14957264957264957	0.11818181818181818	0.0338983	0.017543859649122806	0	0.02	0	0.045454545454545456	0	0.1676300578034682	0.0948276	0	0	0.1362126245847176	0.019230769230769232
Time to Peak (ms) - Q1 (11)	0.00763359	0.0363636	0.0512821	0.0714286	0	0.08	0.047619047619047616	0	0.05	0	0	0	0	0	0	0	0	0.035483870967741936	0	0.0361991	0.0338983	0	0.05	0	0.0351438	0.0672269	0.0714286	0.0392157	0.05	0.0512821	0.0392157	0.0512821	0	0.0272727	0.0391304	0.0449438	0.0333333	0	0	0.05	0	0.0666667	0	0.0424242	0.031914893617021274	0	0	0.036544850498338874	0
Time to Peak (ms) - Q2 (10)	0.031496062992125984	0.0181818	0.0526316	0.0357143	0	0	0	0	0.0526316	0	0	0	0	0	0.0714286	0	0.0769231	0.0322581	0	0.0363636	0.0169492	0.027777777777777776	0	0	0.0319489	0.024390243902439025	0.027777777777777776	0.0196078	0	0.0253165	0	0.0526316	0	0.0566038	0.039301310043668124	0.010989	0.034482758620689655	0.038461538461538464	0	0	0	0.0714286	0	0.049079754601226995	0.0212766	0	0	0.0332226	0
Time to Peak (ms) - Q3 (10)	0.0396825	0.0181818	0	0.0357143	0	0.04	0.05	0	0	0	0.058823529411764705	0	0.0625	0	0	0	0	0.0322581	0	0.027027	0	0.0882353	0	0.058823529411764705	0.0319489	0.05	0.0422535	0.04	0.0526316	0.0253165	0.04	0	0	0.046729	0.039301310043668124	0.0574713	0	0	0	0	0	0	0	0.042682926829268296	0.0322581	0	0	0.0332226	0.047619047619047616
Time to Peak (ms) - Q4 (10)	0.031496062992125984	0.037037037037037035	0	0.0357143	0	0.0833333	0	0	0	0	0	0	0	0	0.0714286	0	0	0.0322581	0	0.0316742	0.0169492	0.0571429	0	0	0.0319489	0.0413223	0.0571429	0.0196078	0	0	0	0	0	0.046729	0.034782608695652174	0.033707865168539325	0	0	0	0	0	0	0	0.042682926829268296	0.0322581	0	0	0.0332226	0
Time to Relaxation (ms) - Reported (10)	0.031496062992125984	0.0181818	0.0526316	0.0740741	0	0	0.05	0	0	0	0	0	0	0	0.0714286	0	0	0.0322581	0	0.0316742	0.0169492	0.027777777777777776	0.0526316	0	0.0319489	0.05	0.0422535	0.04	0.0526316	0.0519481	0.04	0.0526316	0	0.0566038	0.039301310043668124	0.022222222222222223	0	0	0	0.0526316	0	0	0	0.0363636	0.043478260869565216	0	0	0.0332226	0
Time to Relaxation (ms) - Q1 (5)	0.016129032258064516	0	0.0606061	0.0909091	0	0	0	0	0	0	0	0	0	0	0	0	0	0.016129032258064516	0	0.0182648	0	0	0.0714286	0	0.0159744	0.034188	0.029850746268656716	0.021739130434782608	0.0714286	0.027027	0	0.0606061	0	0.038834951456310676	0.021929824561403508	0.011627906976744186	0	0	0	0	0	0	0	0.018404907975460124	0.0224719	0	0	0.016611295681063124	0
Time to Relaxation (ms) - Q2 (5)	0.016129032258064516	0.02	0	0	0	0	0.0666667	0	0	0	0	0	0	0	0.1111111111111111	0	0	0.016129032258064516	0	0.013636363636363636	0.018518518518518517	0.0322581	0	0	0.0159744	0.0168067	0.014705882352941176	0.021739130434782608	0	0.027027	0.044444444444444446	0	0	0.0190476	0.017467248908296942	0.011627906976744186	0	0	0	0.0714286	0	0	0	0.018404907975460124	0.0224719	0	0	0.016611295681063124	0
Conduction Velocity (cm/s) - Reported (14)	0.0546875	0.034482758620689655	0.023255813953488372	0.03125	0	0	0	0.043478260869565216	0	0	0.1	0	0	0	0	0	0.058823529411764705	0.0451613	0	0.049773755656108594	0.0322581	0	0.043478260869565216	0	0.0447284	0.023622047244094488	0.012987012987012988	0.0181818	0.043478260869565216	0.036585365853658534	0.037037037037037035	0.023255813953488372	0	0.0545455	0.0386266	0.0212766	0	0	0.04	0	0	0	0	0.0479042	0.041666666666666664	0	0.037037037037037035	0.0430464	0
Conduction Velocity (cm/s) - Q1 (7)	0.0578512	0	0	0	0	0	0	0	0	0	0	0	0	0	0	0	0	0.0225806	0	0.0273973	0.017857142857142856	0	0	0	0.022364217252396165	0.0165289	0.014285714285714285	0.020833333333333332	0	0.0263158	0.0425532	0	0	0.0380952	0.026200873362445413	0.022988505747126436	0	0	0	0	0	0	0	0.037037037037037035	0.010869565217391304	0	0	0.023255813953488372	0
Conduction Velocity (cm/s) - Q2 (7)	0	0.0392157	0.027777777777777776	0.04	0	0	0	0.0625	0	0	0.15384615384615385	0	0	0	0	0	0.1	0.0225806	0	0.022727272727272728	0.017857142857142856	0	0.0625	0	0.022364217252396165	0.00819672	0	0	0.0625	0.012987012987012988	0	0.027777777777777776	0	0.018691588785046728	0.012931	0	0	0	0.0555556	0	0	0	0	0.012048192771084338	0.0333333	0	0.05	0.019867549668874173	0
AP Conduction Velocity (cm/s) - Reported (28)	0.11194029850746269	0.0724638	0.017543859649122806	0.021739130434782608	0.047619047619047616	0	0	0	0	0	0.058823529411764705	0	0.0606061	0.030303030303030304	0.03125	0	0	0.0868167	0	0.0695652	0.0540541	0.057692307692307696	0.0555556	0.058823529411764705	0.0859873	0.043478260869565216	0.022222222222222223	0.029411764705882353	0.0555556	0.042105263157894736	0.0447761	0.017543859649122806	0	0.0833333	0.0666667	0.047619047619047616	0.0212766	0.022727272727272728	0	0	0	0	0	0.0738636	0.0754717	0.045454545454545456	0.05	0.089404	0
AP Conduction Velocity (cm/s) - Q2 (8)	0.0403226	0.038461538461538464	0	0.038461538461538464	0.043478260869565216	0	0	0	0	0	0	0	0	0	0	0	0	0.025806451612903226	0	0.018018018018018018	0.017543859649122806	0	0.125	0.0666667	0.025559105431309903	0.00813008	0	0.0204082	0	0	0	0	0	0.018518518518518517	0.012875536480686695	0.011235955056179775	0	0	0	0	0	0	0	0.011976047904191617	0.010752688172043012	0.0833333	0.047619047619047616	0.026578073089700997	0
AP Conduction Velocity (cm/s) - Q1 (7)	0.0406504	0.019230769230769232	0.027777777777777776	0	0	0	0	0	0	0	0	0	0	0	0	0	0	0.0225806	0	0.0180995	0.0363636	0.030303030303030304	0	0	0.022364217252396165	0.00819672	0.014285714285714285	0	0	0.012987012987012988	0	0.027777777777777776	0	0.0380952	0.021739130434782608	0.011363636363636364	0	0	0	0	0	0	0	0.0306748	0.021978	0	0	0.023255813953488372	0
AP Conduction Velocity (cm/s) - Q4 (7)	0.015873015873015872	0.019230769230769232	0	0	0.045454545454545456	0	0	0	0	0	0.0714286	0	0.0769231	0.0833333	0	0	0	0.0192926	0	0.013513513513513514	0	0.0625	0	0.0714286	0.0191083	0.025	0	0.020833333333333332	0.13333333333333333	0.04	0.0652174	0	0	0.0283019	0.021739130434782608	0	0.038461538461538464	0.043478260869565216	0	0	0	0	0	0.012048192771084338	0.0333333	0	0.05	0.019867549668874173	0
AP Conduction Velocity (cm/s) - Q3 (6)	0.024193548387096774	0.0196078	0	0	0	0	0	0	0	0	0.0769231	0	0.0833333	0	0.1	0	0	0.0193548	0	0.0228311	0.0181818	0	0	0	0.019169329073482427	0.00826446	0.014492753623188406	0	0	0	0	0	0	0.00934579	0.012987012987012988	0.0352941	0	0	0	0	0	0	0	0.024539877300613498	0.022222222222222223	0	0	0.019933554817275746	0
AP Amplitude (mV) - Reported(40)	0.1258741258741259	0.0487805	0.0769231	0.0350877	0.037037037037037035	0.0181818	0	0.0204082	0	0	0.0666667	0.0212766	0.0681818	0.0697674	0.046511627906976744	0	0.023255813953488372	0.12903225806451613	0	0.0705394	0.0843373	0.13559322033898305	0.1111111111111111	0.0666667	0.12779552715654952	0.10638297872340426	0.061224489795918366	0.0512821	0.1111111111111111	0.1326530612244898	0.10810810810810811	0.0769231	0	0.10077519379844961	0.14042553191489363	0.079646	0.0526316	0.14	0.061224489795918366	0.041666666666666664	0	0.022727272727272728	0	0.12290502793296089	0.0862069	0.017543859649122806	0.038461538461538464	0.1254125412541254	0.04
AP Amplitude (mV) - Q1 (11)	0.0393701	0.017857142857142856	0.025	0.034482758620689655	0.038461538461538464	0	0	0	0	0	0.0555556	0	0.125	0	0.0666667	0	0	0.035483870967741936	0	0.022321428571428572	0.0892857	0	0	0.0555556	0.0351438	0.032520325203252036	0.041666666666666664	0	0.05	0.025	0.019230769230769232	0.025	0	0.0366972	0.034632	0.021978	0	0.0769231	0.0952381	0.05	0	0	0	0.0361446	0.043010752688172046	0	0	0.033112582781456956	0
AP Amplitude (mV) - Q2 (10)	0.056451612903225805	0.037037037037037035	0	0	0	0	0	0	0	0	0.058823529411764705	0	0.0625	0	0	0	0	0.0322581	0	0.017857142857142856	0.0169492	0.027777777777777776	0.17647058823529413	0.058823529411764705	0.0319489	0.016129032258064516	0	0.0196078	0.0526316	0.0253165	0.04	0	0	0.046729	0.039301310043668124	0.033707865168539325	0	0.038461538461538464	0	0	0	0	0	0.023952095808383235	0.0212766	0.037037037037037035	0.043478260869565216	0.029801324503311258	0.047619047619047616
AP Amplitude (mV) - Q4 (10)	0.031496062992125984	0.0181818	0.0810811	0.0357143	0	0.04	0	0.0526316	0	0	0	0	0	0	0	0	0.0769231	0.0322581	0	0.017857142857142856	0	0.12121212121212122	0.0526316	0.058823529411764705	0.0319489	0.0327869	0.027777777777777776	0.0196078	0.0526316	0.0519481	0.0196078	0.0810811	0	0.0181818	0.034782608695652174	0.022222222222222223	0.1111111111111111	0.038461538461538464	0.047619047619047616	0	0	0.0714286	0	0.042682926829268296	0.010526315789473684	0	0.043478260869565216	0.0332226	0.047619047619047616
AP Amplitude (mV) - Q3 (9)	0.015625	0	0.0263158	0	0.041666666666666664	0	0	0	0	0	0.0625	0.0625	0	0.25	0.0769231	0	0	0.0290323	0	0.017937219730941704	0.017241379310344827	0.0909091	0.0555556	0	0.028754	0.041666666666666664	0.013888888888888888	0.0408163	0.11764705882352941	0.0666667	0.0851064	0.0263158	0	0.0183486	0.034934497816593885	0.0224719	0	0.13043478260869565	0	0.0555556	0	0	0	0.030303030303030304	0.0326087	0	0	0.029900332225913623	0
Resting Membrane Potential (mV) - Reported (44)	0.12244897959183673	0.058823529411764705	0.1044776119402985	0.0327869	0.034482758620689655	0.0169492	0	0.018867924528301886	0	0	0.061224489795918366	0.0196078	0.0625	0.0869565	0.020833333333333332	0	0.0212766	0.14193548387096774	0.021739130434782608	0.0916667	0.0804598	0.12698412698412698	0.10204081632653061	0.04	0.14057507987220447	0.1267605633802817	0.0693069	0.075	0.10204081632653061	0.16161616161616163	0.11688311688311688	0.1044776119402985	0	0.0814815	0.13807531380753138	0.0862069	0.0491803	0.12962962962962962	0.0769231	0.038461538461538464	0	0.020833333333333332	0	0.12021857923497267	0.1016949152542373	0.0163934	0.0545455	0.13486842105263158	0.037037037037037035
Resting Membrane Potential (mV) - Q2 (13)	0.0551181	0.0350877	0.023809523809523808	0.0322581	0	0	0	0	0	0	0	0	0	0.11764705882352941	0	0	0.0625	0.041935483870967745	0	0.03125	0	0.025641	0.2777777777777778	0	0.0415335	0.032	0	0.0377358	0.0952381	0.05	0.057692307692307696	0.023809523809523808	0	0.0550459	0.04329	0.021505376344086023	0	0.0714286	0	0	0	0	0	0.029585798816568046	0.042105263157894736	0.0333333	0.08	0.039735099337748346	0
Resting Membrane Potential (mV) - Q1 (11)	0.023255813953488372	0.0363636	0.025	0	0.038461538461538464	0.038461538461538464	0	0	0	0	0.0555556	0.0555556	0.058823529411764705	0.13333333333333333	0	0	0	0.035483870967741936	0	0.017777777777777778	0.0338983	0.11764705882352941	0	0.0555556	0.0351438	0.040983606557377046	0.0273973	0.0392157	0.05	0.0512821	0.06	0.025	0	0	0.0257511	0.021978	0.0333333	0.12	0	0	0	0.0666667	0	0.023809523809523808	0.031914893617021274	0	0	0.029703	0.0952381
Resting Membrane Potential (mV) - Q3 (11)	0.0393701	0	0.10810810810810811	0	0	0	0	0.05	0	0	0.0555556	0	0.058823529411764705	0	0	0	0	0.035483870967741936	0	0.0315315	0	0.0857143	0	0.0555556	0.0351438	0.049586776859504134	0.056338028169014086	0.019230769230769232	0.05	0.0789474	0.0392157	0.10810810810810811	0	0.018018018018018018	0.043668122270742356	0.0449438	0.0689655	0.0769231	0.045454545454545456	0	0	0	0	0.0552147	0.010416666666666666	0	0.041666666666666664	0.036544850498338874	0
Resting Membrane Potential (mV) - Q4 (9)	0.023622047244094488	0.018518518518518517	0.0263158	0.037037037037037035	0.041666666666666664	0	0	0	0	0	0.0625	0	0.0666667	0	0.0769231	0	0	0.0290323	0.0909091	0.017937219730941704	0.0925926	0	0	0	0.028754	0.0245902	0.013888888888888888	0.02	0.0555556	0.025641	0.02	0.0263158	0	0.027777777777777776	0.030434782608695653	0.0224719	0	0	0.16666666666666666	0.11764705882352941	0	0	0	0.024096385542168676	0.043956	0	0	0.029900332225913623	0
Max Capture Rate (Hz) - Reported (15)	0.030303030303030304	0.016666666666666666	0.0714286	0	0.0333333	0	0	0.041666666666666664	0.041666666666666664	0	0	0	0.047619047619047616	0	0	0	0	0.0483871	0.2	0.0639269	0.015625	0	0	0	0.0479233	0.0650407	0.0675676	0.0555556	0	0.0886076	0.0754717	0.0714286	0	0.044642857142857144	0.0565217	0.043010752688172046	0	0	0.22727272727272727	0.041666666666666664	0	0	0	0.0352941	0.041237113402061855	0	0.11538461538461539	0.0429043	0
Max Capture Rate (Hz) - Q1 (8)	0.023809523809523808	0.018867924528301886	0.027027	0	0.043478260869565216	0	0	0.058823529411764705	0.058823529411764705	0	0	0	0	0	0	0	0	0.025806451612903226	0	0.0319635	0.017543859649122806	0	0	0	0.025559105431309903	0.0163934	0.0285714	0	0	0.025974025974025976	0.0204082	0.027027	0	0.018518518518518517	0.026087	0.034482758620689655	0	0	0.1111111111111111	0.058823529411764705	0	0	0	0.011976047904191617	0.010752688172043012	0	0.15789473684210525	0.019801980198019802	0
Max Capture Rate (Hz) - Q2 (7)	0.00787402	0	0.0571429	0	0	0	0	0	0	0	0	0	0.0769231	0	0	0	0	0.0225806	0.42857142857142855	0.0321101	0	0	0	0	0.022364217252396165	0.0512821	0.0441176	0.0652174	0	0.0684932	0.0652174	0.0571429	0	0.0283019	0.0307018	0.011363636363636364	0	0	0.1875	0	0	0	0	0.024390243902439025	0.0333333	0	0	0.023255813953488372	0
[truncated: 355 more columns]

## Sheet: 3_DissimilarityMerged_27Aug24
Iteration	28	26	27	22	32	29	23	25	8	12	31
1	0.9318335590201522	0.918455	0.9302862136841012	0.9300590817797332	0.9258675377174981	0.9284381139710344	0.9309152129619127	0.9261590818610234	0.8512278662108324	0.8576377581968279	0.9444565144703416
2	0.9237721220298758	0.9414158928364995	0.9267977403973939	0.9152174285016982	0.9254148970780123	0.936094	0.9226686712922918	0.917301	0.8574706777786949	0.8957064547723395	0.9267579041966447
3	0.9252807777895088	0.9381725053213317	0.9342657015615193	0.9257963622257854	0.9245242994898208	0.9301213838142424	0.9082647537581365	0.928816	0.8413820339722098	0.8764822685986725	0.9062152490356289
4	0.9128705450870412	0.9192756583709392	0.927917	0.909627	0.9478442971448078	0.9248581065308111	0.9262261659818504	0.916829	0.8022808223008121	0.8791667575404851	0.9191445754862583
5	0.9185856526418749	0.9277452089570851	0.9365572680208142	0.9277866398110238	0.9133980399978388	0.9314752893716454	0.9194597504838324	0.9199198493370079	0.8543007143537804	0.8917245085716665	0.9241527575565658
6	0.9498127965841094	0.9262380331625845	0.9305295489491783	0.9244231964341068	0.9242462914918534	0.9205631751530221	0.9141360194355864	0.918708	0.8342070528513632	0.8905449810420021	0.9179879756045154
7	0.9323996093655798	0.9243418397769508	0.9115471540679843	0.9171306070531593	0.923885	0.9262828141341262	0.9090726535321919	0.9119759179530526	0.8331199392904947	0.8918415685714606	0.9235651421372558
8	0.9105590451408144	0.9249483754109625	0.918359	0.9104705611421814	0.9227865328138731	0.9320715658443658	0.9354656966824798	0.921796	0.8519060933950922	0.8925089437233581	0.9342964596441263
9	0.928021	0.932398	0.933574	0.9244637377208893	0.9300456114159439	0.9162694240159537	0.8973606007108309	0.9141573750418093	0.8218428290460635	0.8902077520006094	0.9103829605022804
10	0.9338034015458694	0.9246351119866868	0.9307591983788198	0.9304842850958505	0.9192505748099672	0.921291	0.8998138994205263	0.9046798879228836	0.8327540687960546	0.8946892062599104	0.9161106055416475
11	0.939088	0.9261947762102426	0.9250847586755081	0.9203333514272636	0.9449087298960652	0.9368072154333521	0.9269452522137671	0.9223143605862706	0.8413563270053728	0.8711269933824745	0.922359
12	0.9362343629309063	0.933701	0.9370607013581176	0.9004253974774074	0.914598	0.9194660087855681	0.9233460943449276	0.9146254590278718	0.8006097509247689	0.8825324963959308	0.9438906736575938
13	0.9314495698873358	0.9221186015142369	0.9176669669832331	0.9248059406224641	0.9230953300321574	0.9126167947106167	0.9371632445164263	0.9207084006828836	0.860876	0.8642063614328008	0.9030482046510827
14	0.9283159602780946	0.9351115512584633	0.8970428593828174	0.9196355055169633	0.928817	0.9172770656385256	0.9236434126871493	0.9234268291640891	0.8352684152814341	0.8651441519326784	0.9083431061367303
15	0.9045616659076426	0.8852314500427172	0.9008023199505536	0.9091274771944113	0.9326668413646443	0.9355781586426865	0.9116866822456593	0.9142790647877378	0.8441419468503866	0.8612683524878687	0.9285455840517423
16	0.9388986591255664	0.9274309976720156	0.9269150306916166	0.9216023903431161	0.9259079753811392	0.9300325752346346	0.9073875459460823	0.9364396186211762	0.8413448938809478	0.8978198183035563	0.9342735883376366
17	0.9232042278232596	0.9221074639145848	0.9262627949853106	0.9270857788375064	0.9214569689518889	0.9241140616209695	0.9083583741577786	0.9094439965040256	0.8167021125147875	0.8736265209544586	0.9362511857048317
18	0.9221787804412672	0.9086590947290643	0.8949300801261347	0.9357868978975863	0.9384161779468351	0.9199489207624897	0.8897553799111663	0.9030277643052561	0.8303264093894542	0.8641635965429538	0.940791
19	0.9346445677980775	0.9321626904315756	0.9317753129292393	0.911897	0.9177720544631778	0.9185941298953466	0.9190248892700608	0.930212	0.8500576442411778	0.8946916959425525	0.9249185765137902
20	0.9324587788630018	0.9018493161931117	0.9128958789883134	0.9138832517026717	0.934563	0.925356	0.91664	0.9336728674240617	0.8342822259568432	0.9032204505593607	0.9450162653438796
21	0.9194221128068154	0.9267915637101072	0.9322495807236839	0.9158214716330589	0.9346692427984705	0.9249070638329466	0.9173382312383349	0.923499	0.8301494723231022	0.8865636988125858	0.9193259695723118
22	0.9320822974628584	0.9171136934557076	0.9362790782079821	0.9190883908649745	0.934386	0.9242657011963694	0.9324812740314702	0.9241547719789304	0.8524155677637875	0.8947966971300397	0.942901
23	0.917955	0.9225149079091235	0.9275592254945481	0.9223909746911821	0.9175207581603825	0.935703	0.9208092025754996	0.9284748533219152	0.850048	0.8761484215791202	0.9237869021446188
24	0.9246196634887466	0.9319515940662141	0.9297601511988934	0.9216285702764236	0.9410499515630292	0.9400478148716176	0.9231945841124576	0.9252364159444647	0.834891	0.8945823844591305	0.9395066481701149
25	0.901248	0.9415228720533982	0.9177247263260198	0.8956347654861379	0.9332751063778546	0.919231	0.8932967664774979	0.9131210982653465	0.8559721560689053	0.8638649404167267	0.93983
26	0.8891815791237832	0.9350821505844485	0.9263239739285545	0.928576	0.9438905036388088	0.9123513238020273	0.9301105395864796	0.9256450448960275	0.8548327030955374	0.8692463718039641	0.9309239149429142
27	0.8896769831383962	0.9340777803849346	0.9372852109041327	0.9272962791950917	0.9295896132070216	0.9448572460503715	0.9144662804817053	0.9231891934129222	0.8237877256005204	0.8986186481511984	0.936916
28	0.9313790283746411	0.9387013837515177	0.9265612660008169	0.9299565443603167	0.9313330724033586	0.9203276094480841	0.9261987075727489	0.9174058136034783	0.8605703830779436	0.8412123988528308	0.9100748223810061
29	0.923535	0.9062179196790047	0.9044686464497238	0.9161989612068367	0.920501	0.9252665849874113	0.9361343712104483	0.9322962503381241	0.7973632169354236	0.8881097171712978	0.9261919082248397
30	0.9166791864293985	0.934636	0.9068767651199252	0.9152709902874967	0.9363840232568974	0.9340601689476314	0.8892957865157405	0.9021540765193616	0.8627290738573442	0.8858883634343888	0.9222828081216691
31	0.9382015153053661	0.9290035549346298	0.9285484267019615	0.9113156439349954	0.9211988455794241	0.9361815134309122	0.9244002197723595	0.9137971360261461	0.8501575539044128	0.8167915426621893	0.9359853427505769
32	0.9351007470938834	0.9310565096882093	0.911066	0.896924	0.9140542102149584	0.9184151965176096	0.9224922528322849	0.9237514873431713	0.8557232207900618	0.8832697501898542	0.9217514432169052
33	0.9420859347733789	0.9120671270836754	0.9233716770939284	0.9323144847813982	0.9281589253099514	0.9259569020760975	0.9283076885408807	0.9253527708920327	0.857002	0.896547	0.9423348130714989
34	0.9183543821782896	0.9309518248480295	0.9202765819054822	0.9104273622847562	0.9386368928313418	0.9358627877080835	0.8861421098461403	0.9164586646892963	0.8056975294314508	0.8934701026440078	0.9356097677561327
35	0.9373900496589066	0.9278255695203679	0.926261	0.9289609273095375	0.9177164535967994	0.9208120041591625	0.9153681850678759	0.9296716458535959	0.8303627162798066	0.8873432285589374	0.9305163252343707
36	0.9391206204491277	0.9354032499026901	0.9051050305950562	0.9239769242535977	0.9243516799940907	0.9202137303797275	0.933368	0.9218220602609831	0.842551	0.890804	0.9183638993328858
37	0.930132	0.926204	0.9269882062501789	0.9364009391051155	0.931006	0.9376941340568996	0.9249437744518052	0.9366643351006458	0.8688284704741146	0.8751344958185293	0.9117201865735245
38	0.9269778713859783	0.9344931627421905	0.9160982321495146	0.9195380703218379	0.9369587799028443	0.9287013703840687	0.8907448923974337	0.9172837624677983	0.8283686516138943	0.8842836787218396	0.9347151032144352
39	0.9384097974361751	0.9254163003963516	0.9173192863007243	0.9205306130371439	0.9095085376450034	0.9314375009624692	0.9173030287188307	0.9003718777435246	0.8402704042850644	0.8735548766044664	0.9159055202222416
40	0.9215809805176499	0.923047	0.9369355669347749	0.8779220750033403	0.937979	0.932997	0.912466	0.932902	0.8414366444164258	0.8795704560284282	0.9272695543265662
41	0.9211534838081209	0.9140210251576437	0.9026939459569375	0.8997015422454516	0.9294874740479986	0.9266243639711701	0.9066724200127971	0.9259391913205142	0.8545793046803708	0.8336585600974126	0.9211838860556774
42	0.9274252984589656	0.9217846653475916	0.9304159269408894	0.9236669663475012	0.9333914629325395	0.9311602117146115	0.9044920053138641	0.9232185530017105	0.856089	0.8859690860931538	0.9264802924483936
43	0.9220981951982917	0.9236752871233163	0.933209	0.9155235491527999	0.9331354077769336	0.9471602638451045	0.9255977288748432	0.9201085561182757	0.8268899301249149	0.885787	0.9305781961415367
44	0.9215092927805214	0.9279872206158762	0.9098862822589946	0.9122175956590851	0.9193439073032237	0.9368390895999535	0.9005701008208965	0.9171372725317866	0.8564808902918528	0.8951144372637162	0.9140662956296324
45	0.9330925333250549	0.926881	0.9282956130229358	0.9201721249343848	0.9110963116100558	0.9208288445137347	0.9297711381222821	0.9292323169814329	0.8560234440084376	0.8432885602117938	0.9170617935421173
46	0.9271420982949075	0.92378	0.9046752958192449	0.9028958732667861	0.9127517749560716	0.9207791977565468	0.9260738379070262	0.9088251141956948	0.8483153650803621	0.89623	0.9281431986590986
47	0.9314727097612446	0.9363871456556011	0.9237358675085952	0.914519	0.9399883290163489	0.935593	0.9358059939368116	0.9099531784258802	0.8339832516136839	0.8788356951364816	0.9368789893001365
48	0.9116566966835876	0.9289618892846898	0.9317758015367156	0.9293773789050728	0.9531806940083775	0.9353311333840773	0.9063922050271467	0.9081555821531788	0.8473915252138646	0.8898215784989546	0.9335677173811718
49	0.9215866655297612	0.9243675871699933	0.9198656291950819	0.9203243689679668	0.9263859579279863	0.928485	0.9287645117227478	0.9318116148445021	0.8589340183219774	0.8930026151431288	0.9276644532360551
50	0.9266775654840212	0.913202	0.9097838856571513	0.904608	0.9119273731115223	0.9299406480611883	0.9045840879830408	0.9083351030226078	0.8304792267054794	0.887317	0.9337936112909195
51	0.9195204431044673	0.8977368312030607	0.921472	0.9142562928253494	0.9216286362081917	0.9225492909481887	0.926135	0.9254449207744687	0.8275343800747352	0.8678498559657896	0.9346906743278971
52	0.9350342101918748	0.9240843924162333	0.9258982545800656	0.9112960315439277	0.9238009506594015	0.9251660297774514	0.9338059645973936	0.9033839941348971	0.8166417856976504	0.8962895146942415	0.9321006827911166
53	0.930737	0.9276463216896352	0.9084122783917359	0.9287044866569336	0.9253866201235192	0.9386036742534146	0.9086624905159983	0.9275680859873233	0.8452270573975609	0.8916277388694462	0.9321290722984964
54	0.9200477430098262	0.9330171531469181	0.9267744029922864	0.9155849502874706	0.9423597205357959	0.9323714842756815	0.9293197994712558	0.8894429384405101	0.7856279160999593	0.8774303749896118	0.9266967017370963
55	0.9421675057208018	0.9251832616401039	0.9224044382498037	0.9172406274027199	0.9315832343130854	0.9222743504325996	0.9343717471360427	0.9387330951375891	0.849566	0.8765132143030904	0.898449
56	0.9185792450289542	0.9243309161864602	0.9090776568444757	0.8986072010958758	0.9388077500718472	0.9298584769504555	0.8993743591327338	0.9240858449999905	0.8306487379864689	0.8854707681351384	0.9358130877805289
57	0.9285960642876037	0.9082489748498309	0.9404568113298003	0.9288734547179683	0.9266224811390531	0.9079557546083331	0.9253224713518095	0.9129440018138087	0.850543	0.8921614945287923	0.9218932216642919
58	0.9282968437971031	0.9404546695605938	0.9197638595674595	0.9101672681784714	0.9292775890701155	0.9188001351884835	0.9204758443271173	0.9264441934427425	0.8569080004095588	0.8605988532000851	0.9283745720276865
59	0.9321901260221114	0.9174852704574372	0.9284178335730454	0.9158544229075023	0.9431605229356379	0.9140713504012808	0.9201911981147738	0.9110837561681737	0.8298625867204242	0.8992501534175991	0.9319815323379701
60	0.9292180415583339	0.9266003944465062	0.9177389337555216	0.9264921167822038	0.9336595713943341	0.9291322154173735	0.9308034155705373	0.9011267390142669	0.862416	0.8817887269906749	0.9274605624540293
61	0.9304996002884739	0.918357	0.9314109851698276	0.9035544387143133	0.9386834245670921	0.9396799001393868	0.8928919247506623	0.9262495538278988	0.8712797619047619	0.8825244558870505	0.9251629449793352
62	0.9380409310095488	0.9197197735941323	0.9403085731527353	0.9188832797531435	0.9382611314299422	0.9240535337923779	0.9073452900185778	0.9296207647746406	0.8566270267854814	0.8398604501939654	0.9264268303468204
63	0.936636	0.9206146311724545	0.9410627425684397	0.8775262089210016	0.9191299887348803	0.9374235241246873	0.9287179471522117	0.9117590397229246	0.8348306258339004	0.8934236898244845	0.9144304129129345
64	0.9168031152275018	0.9264953652011289	0.9275522120014259	0.9161520068532873	0.9271223647673247	0.9257048465212433	0.922406	0.9047616717660998	0.8272157312583228	0.8872578721168308	0.9378279383767955
65	0.8846366522794478	0.929026	0.9404211572703668	0.9157244663303068	0.9317321691193691	0.9333063339896865	0.9137705653502448	0.9160324696481008	0.8457406047042834	0.8663814330335639	0.9249871623924109
66	0.9266739555896463	0.9248525895745661	0.9396602729746285	0.9087483734179815	0.9361223410794345	0.9237295416893178	0.9268739226583058	0.9305403928229911	0.8359115585280523	0.895824	0.9192934522290616
67	0.9146906763835496	0.9071712173511248	0.9380837324417093	0.9207127504161174	0.9297992517634615	0.9240804852157404	0.9280375195279141	0.9334683782652254	0.8133917011220266	0.8867218888788675	0.9210331430585965
68	0.9198996987280473	0.9169953048292544	0.9335131276235553	0.9049057805109624	0.9330834335666981	0.9374561092406654	0.9354765177256809	0.9198140175334334	0.8155294496812818	0.8717039972166952	0.9435215931794192
69	0.9291776069369194	0.9457843160470152	0.9309770541824376	0.9183304263443667	0.9378966130234587	0.9334336782946314	0.9320897584083128	0.9076034532675804	0.8616405824345412	0.8613364312280796	0.9268418485341897
70	0.9348569246186068	0.9355363581576575	0.9220197862024812	0.9207391612960756	0.9261770042837698	0.9443759727509691	0.9340206371446997	0.8960066868131713	0.8576680730979773	0.8335747682221099	0.947565
71	0.9352582632387668	0.9334205045757525	0.9154753961930011	0.8998533862037181	0.9245021282583652	0.9365750148963273	0.9230491183503217	0.9341443663506155	0.8107825368730956	0.900227	0.9234424235461927
72	0.9322961970122003	0.9264392445502152	0.9279495971544443	0.9105245543620789	0.9361800345102842	0.9333593901717382	0.9090909756604472	0.9190418091180551	0.8265415442820476	0.8870908977450992	0.9200088439400466
73	0.9297022723917706	0.9169703123853287	0.9292005719080342	0.8978469565563557	0.9284770605398336	0.9262422714490013	0.9279537001925448	0.9323257147242472	0.8556172935582802	0.8674556706216142	0.8985486504652278
74	0.9289163854386453	0.9281043244763045	0.9359344643394818	0.8992485525007211	0.9362113192677974	0.9192442453387821	0.916705	0.9006059030040369	0.8720714546783626	0.8753628351643238	0.9180832835965512
75	0.9138815502797366	0.9340883520607091	0.9340951463587879	0.9221352460248945	0.911061	0.9353092763857979	0.9249021754166991	0.9093208426325091	0.8527183530524575	0.8826798221259285	0.9079442680038066
76	0.9335647714981573	0.9325116251207746	0.9267216425376631	0.9008010979834346	0.9217315317241843	0.9163983804185384	0.9191577414495057	0.9396534988862316	0.8166069890124699	0.8854325038399932	0.9373029400778298
77	0.9346069935286562	0.9165441687470105	0.9414069721210735	0.9151740332234108	0.9422086855271575	0.9262222873044464	0.9266774754761968	0.9273887900949993	0.8702920953816544	0.8850691122014239	0.9398161931926778
78	0.9272295539828808	0.9295811800337452	0.9454228508915885	0.922595	0.9365453733285585	0.9092774275644588	0.8934658509705831	0.9111323336137478	0.845926	0.8929563266618517	0.9233995442481303
79	0.9183169735133274	0.9350465512356917	0.9181451334681008	0.9076996548317321	0.9367317433806972	0.9365673268455672	0.9300427049502744	0.9088817744557066	0.8508418142996057	0.8937722273861642	0.9244644094166263
80	0.9165090827528104	0.9358441324315299	0.9392479049493148	0.9156369076393734	0.9257518498664448	0.9302064519148835	0.9099578108916961	0.9059331184742004	0.8447557090231423	0.9001471243442652	0.9293028569438867
81	0.9054370724464482	0.924004	0.9289855174341831	0.9179762059757602	0.9372940507382078	0.9296026228696483	0.9273440826837702	0.9249636739343873	0.8602795379803163	0.8660550193906978	0.9364991819094836
82	0.9212073942990692	0.9283411274173654	0.936568	0.930647	0.9239057748444552	0.9047244021525269	0.9271646901938664	0.9167999351497972	0.8577952505547825	0.9050145468535143	0.9187303499671204
83	0.9349318320484138	0.9175674945612005	0.8967717003870389	0.9096938066809365	0.918918	0.9363705114739076	0.9218690235854521	0.9036354223484926	0.8489629039261393	0.8704931864746347	0.9034240336184739
84	0.9136579840169672	0.9343944299180396	0.9107164100678523	0.9329888510715321	0.9257931766459685	0.921369	0.9135958488805472	0.921697	0.8539479573929779	0.8644516408384132	0.9271350696404967
85	0.9354115179713686	0.9237166692844954	0.9402779078622054	0.9249068717892066	0.9301266553176825	0.9174679996844668	0.9216927566669225	0.9167827544032212	0.8084457656740709	0.8864183187698886	0.9415980386058973
86	0.9329802139950153	0.9381541380263649	0.9396291733211768	0.9265224356473731	0.9283366932100346	0.935762	0.9165266911341349	0.9223799278116246	0.8417687803984253	0.8898376549539281	0.9275477742144431
87	0.9438587681162052	0.9193770598815344	0.896997	0.9255761895834792	0.923029	0.920469	0.9140896160371664	0.9273930215804116	0.8551437885230078	0.8874816689192228	0.9296585102631599
88	0.932135	0.921901	0.9303686518594296	0.9275616760859114	0.9137883270083962	0.9315716617951262	0.8982133985924723	0.9062630596562875	0.8542293270227771	0.8619912525095185	0.9392526801467281
89	0.9270148546503251	0.9166825398250725	0.9374230762738667	0.9063677654132429	0.9348146501697205	0.9398231645378181	0.88029	0.9059505200315481	0.8280023048499937	0.8865258523723213	0.9258761507410534
90	0.9437910483498188	0.9304378829735099	0.8953094152091109	0.924167	0.9271688022410952	0.9128358597347864	0.9124435125665823	0.9319112565107335	0.8401404729355434	0.8970677749056973	0.9311858691004646
91	0.9312553899171077	0.9199353899689506	0.9239180033501131	0.924489	0.9471379232818762	0.9444776185514349	0.9193079117432473	0.9276138772130054	0.855546	0.8942174720259944	0.9360466607897646
92	0.9280923220291148	0.8923558615962505	0.9155584213749572	0.9157485658042103	0.9233888809326125	0.9157907840320119	0.9193235563863449	0.9133374715488217	0.8462008453317426	0.8628498110684215	0.917298
93	0.9221283176873489	0.928079	0.9274656139820076	0.9315906950198541	0.9184238242498741	0.9178985084942812	0.9331050360708449	0.9223274358332764	0.8442248737000888	0.8829440861336796	0.9143139157311707
94	0.9476660417356266	0.9360596879014917	0.9241980033401964	0.9079925364159821	0.9326461977081897	0.9296698260914219	0.9245666157416659	0.9367185790469381	0.8616357353498119	0.8880745851619248	0.9225347310139534
95	0.9332070729610772	0.9319658243968847	0.9053808607440467	0.9242017405916642	0.949217	0.9372757314523092	0.9108717705991592	0.928063	0.8545175628088171	0.8958822310134728	0.9428245456776291
96	0.9272969701167841	0.9337397318066117	0.9374634451109316	0.9344934655951522	0.9283283063472058	0.9312152795382793	0.9235504839926065	0.9299599546392741	0.8556589416931909	0.8838927290768303	0.9278040399236264
97	0.9020582125107904	0.9335719685268695	0.9142909975857874	0.9196142404276972	0.9210541526060549	0.9212704250925559	0.9113505751525747	0.9150905357299817	0.8659181707419782	0.8762538436612776	0.9285633916102962
98	0.9127705238638806	0.9162216438737661	0.9170578682818902	0.9247160177605424	0.9365021949516721	0.9157070402749405	0.8923384589116999	0.9234608578255887	0.8198655317528617	0.8965042043680215	0.9220074661993003
99	0.9405803912289573	0.9378125527008108	0.900587	0.9239671475586462	0.9300302845482333	0.9427807841695625	0.9129020718037009	0.9310389392112888	0.8473562139553281	0.863863	0.929894
100	0.9386803468441364	0.92636	0.9253745126532251	0.9178602393017171	0.9134014800196182	0.9058068642594224	0.9095655174346436	0.921432	0.8271875628092606	0.877648	0.9022820284814357
101	0.8955515597348702	0.9291362388383158	0.9323009907953596	0.9254622724763938	0.9324909485842214	0.9420259500693515	0.9115531499291092	0.9069061748247473	0.8141918244957294	0.8653703371983484	0.9289672505461392
102	0.9391255571777716	0.9147140930159205	0.9336298105079591	0.9188974879559104	0.933131	0.9391709893956491	0.9248255185229253	0.9352503274733293	0.8457517513901673	0.8694997927435377	0.9098721660397319
103	0.9200478485123538	0.9176104967462329	0.915214	0.9315521844120059	0.9395574377870308	0.9389469985050622	0.9077096728266788	0.9328141510284156	0.7881156909997615	0.8937788286402261	0.9261835581971248
104	0.8821312312807423	0.9119203464680239	0.9304011444294639	0.9196365231056223	0.9284420099014882	0.9429573238691578	0.9177754791884027	0.9243928627502198	0.8176573752272344	0.8946997789584034	0.906431
105	0.9041805674644239	0.9104056856876029	0.9366460696171425	0.9198754464440977	0.9305995985556654	0.9204993658305438	0.9208725063493083	0.9252048800570738	0.8409269606041754	0.899821	0.9228130910946005
106	0.9337621351596156	0.9189713478145289	0.924171	0.9085923489102187	0.9338713410419849	0.9312552867759032	0.9313998837340698	0.9076309375695694	0.8588360998868887	0.8567362816324525	0.9242341273940562
107	0.925056	0.9191085414225681	0.9277523812523925	0.9286839577483538	0.9483175185203139	0.941239	0.9351260379573347	0.9241903623484059	0.8640588628354753	0.8837619935524862	0.9391390311912218
108	0.9445040901676549	0.9294817736952083	0.9355388763004782	0.914627	0.9251744005996753	0.9301251180931435	0.9292829591697414	0.934224	0.8497345763556705	0.8997426697973626	0.9218696286532829
109	0.936628	0.9342191234271451	0.9404344528302624	0.9188492172350281	0.9218691224536809	0.925126	0.9056069175436029	0.9320033974379984	0.8556927202534037	0.8982112705399566	0.9133879107339904
110	0.9210978314076153	0.9352136565656982	0.9362411612013906	0.9206147195886747	0.939715	0.9382582876130385	0.906403	0.9333376904202311	0.8563753109921841	0.8702209418191872	0.9293425344357044
111	0.9238892669420026	0.9259075859104562	0.9306575664819259	0.9140923566853938	0.9297096596779564	0.908658	0.9297673348773771	0.9315412503028425	0.8396693265181684	0.8731375767468673	0.9328071396726436
112	0.9090582011378608	0.9287647024490707	0.912998	0.9138649468971948	0.9233186925539112	0.9222357414414118	0.9255259477404862	0.9348688032363722	0.818883	0.8904148325925573	0.9343853584222687
113	0.9421645316553479	0.914435	0.9197270264780143	0.9085165723339049	0.9156180747084119	0.9437707353931168	0.9151152204652134	0.9302108043295729	0.8529031633344875	0.8884238277983073	0.9448364132325465
114	0.9275397842241561	0.9109495532304884	0.8974435048673172	0.9161004859125721	0.9272019479939844	0.9301893177068016	0.9367080083883409	0.9442929276144436	0.8136936415020328	0.8885379774521756	0.9405956138276123
115	0.9154889624948982	0.9157912467447278	0.929809	0.8949454761468931	0.9410996267840154	0.9367494504536938	0.9235261544485498	0.8980623256506977	0.8619365883859034	0.8944577960623503	0.9439239997517559
116	0.9236939693487237	0.9043158378486685	0.9358154037697753	0.9058287609227933	0.946758	0.9359008858096554	0.9067848377085429	0.927532	0.8291426136235809	0.8836483263003508	0.9279999704462514
117	0.9166369875260212	0.9356814105177439	0.9234405477392088	0.9044976825057681	0.938282	0.9203226858367519	0.9112970275252902	0.9232097607669365	0.8419725846775112	0.870008	0.9327727675157866
118	0.9371144512676252	0.9354973501951573	0.9290216599479912	0.9175920371670494	0.9390648196765181	0.9425388418883671	0.9304501105542696	0.8976965931780583	0.8485940445397683	0.8613530906997662	0.937973
119	0.9331026808998747	0.9185357379202747	0.924853	0.9182201876738788	0.9438536961750442	0.9211921055147902	0.9234280516362693	0.9305021483925852	0.8640097829826272	0.7779385315981467	0.9407245946673498
120	0.9326248959941074	0.9236171269494017	0.9357229787847748	0.9111833750345576	0.9169456689188535	0.9150755139746981	0.926699	0.9147040908518178	0.848051	0.8799127139453566	0.9318687214385943
121	0.9460913500131399	0.9260371895626848	0.9216397262751208	0.9291148201575467	0.9428085874429816	0.932508	0.916918	0.9312876836582944	0.8604312512700671	0.8471889728040511	0.9329298080599809
122	0.9318595407647067	0.9228121727942834	0.897954	0.9320064899080513	0.9027021514570932	0.9416913292047953	0.89349	0.9056825343770586	0.8550825137699992	0.8802831246221828	0.9277862567947396
123	0.9266162985053364	0.9396077706317867	0.8836106222484121	0.9221501354359233	0.9483677558163913	0.9269149165609121	0.9238520467338616	0.9209302378370248	0.8504307580287247	0.8972561236154338	0.9268744541766112
124	0.9233694497215207	0.9118447117969652	0.9181829998668862	0.9155888951400294	0.9347579573473717	0.9347917233609806	0.9362824016076621	0.9118581794840404	0.7813923298581134	0.8772123268554521	0.9280380264938795
125	0.9246573700205559	0.9195108716084378	0.9368020430119054	0.9274523360603883	0.9339954077772428	0.9332329367052898	0.874622	0.9288935883433903	0.8327140741303869	0.8829968746068815	0.9376486557781133
126	0.9180859887941788	0.9234375827382226	0.9365029520719761	0.9201038393440943	0.9254159161722143	0.925888	0.9298441871748592	0.9281066629489482	0.8486304737230501	0.8969629966478508	0.9313413380912092
127	0.9308170307137712	0.9353315520008677	0.9017894092602874	0.9309186198056747	0.9311563923729296	0.9252034294905895	0.9355470177541554	0.9143014400269603	0.7852863384024652	0.8833322599843697	0.9392424463094924
128	0.9225515143615889	0.9298428158979696	0.9383551987461618	0.9339213880283861	0.9141836836503137	0.9273486036223113	0.9311421353072097	0.9205708114399677	0.8298983191539377	0.896172	0.9437228620783379
129	0.9017386627534875	0.9149421398230617	0.9307955656109527	0.9130548143852875	0.9019797138686936	0.9329996007116135	0.919486	0.9230382976953713	0.8497970168676228	0.8866406020758784	0.9159628375729042
130	0.9417647494486954	0.9048866676717063	0.9255642021853883	0.9276970402078413	0.9257512662472459	0.9405106627998743	0.8910421863417463	0.9146334408471231	0.8096897161240248	0.8834385591135324	0.9170455669746226
131	0.9242242526825228	0.9041050550951751	0.9292203125530564	0.9162324425315282	0.9422192313189008	0.9169696832776068	0.9180824890506925	0.9097177341460295	0.8452722614464258	0.8724566361506448	0.9314247699808972
132	0.9213172678427338	0.9157965862649402	0.9259274907593956	0.9264724284628396	0.9334143684605857	0.9379404115562773	0.8971381758056026	0.9306928581041396	0.8413967603559539	0.8921015051877156	0.9189624004321929
133	0.9362861360345691	0.8895443223116838	0.9246139278220274	0.918791	0.9410545896570051	0.9347286595527639	0.9292804762544312	0.9212544925396813	0.844386	0.8850587034117378	0.9168723400419638
134	0.9279246832224921	0.9332686644719208	0.9284286905180513	0.927399	0.9314021802732334	0.922906	0.9266630149968672	0.9024166365083149	0.8409685149672697	0.8843261493058551	0.9227072038134146
135	0.9303223078988699	0.9115971337716959	0.8946074010349804	0.926108	0.9168469411077831	0.927715	0.9411273279723767	0.9297508755963024	0.8366122801910627	0.8870364749347953	0.9161148946164843
136	0.9256717069439284	0.9269736982887561	0.9209866280847359	0.9072032121684693	0.9276489926584369	0.9323092810420713	0.9194665744561025	0.9343261431700449	0.8064850578020761	0.8737834941906056	0.9244763074909408
137	0.921568	0.9204009221287315	0.9444419520629657	0.9047060669445319	0.9260379230478137	0.9291428724588736	0.927036	0.9234185783301424	0.8640133006129946	0.8973863385852082	0.9166493805098693
138	0.9267575953166378	0.9354487697267319	0.9172461090945885	0.8756319114315354	0.9439033056183306	0.9242479917264654	0.921922	0.9258059242163185	0.8407068100587127	0.8746495427245785	0.9214906203961754
139	0.9244614157813208	0.8905161711119448	0.9326982653790813	0.9179441616936995	0.9404916085052102	0.9115279455775267	0.9277442879121353	0.9129467092174941	0.8499444222193031	0.888181	0.9422426958005359
140	0.9334946468142106	0.9154347413702589	0.9338765854573604	0.9288381612874462	0.9400553294731644	0.9105594198632867	0.9131634113236033	0.9347532036903524	0.8459577366732391	0.8945382608255574	0.9001219966300206
141	0.9188015486668932	0.9322966931455452	0.9231601373941644	0.9248864146955331	0.9388169827598758	0.9131130763542232	0.9265660587580143	0.9087972616561727	0.843503	0.868858	0.928272
142	0.9055497633591932	0.9253790845045808	0.9240324483646442	0.9195988496203156	0.9268299034363205	0.9343012028710258	0.9218870595079791	0.9291536344175637	0.8446819701557018	0.8642005584965204	0.9284381307125081
143	0.9357574791924044	0.9147033277878881	0.9321285750637901	0.9208678086643783	0.9204783168871343	0.9045781602172976	0.9280033062164255	0.9237615430596322	0.8450761582595309	0.9040086210169834	0.9299342622400857
144	0.9280478696703918	0.9240527605377864	0.9140000967700773	0.9021445409377647	0.9252278979405162	0.932582	0.9141413619128363	0.9315432082375251	0.8372726527500387	0.8972967843206936	0.9278973268069716
145	0.9286692020947651	0.9279474944977912	0.9115812597573009	0.9319017557397786	0.922262	0.9235846491186378	0.919056	0.8992251916506825	0.7999516725241981	0.880899	0.9359727371792684
146	0.9224065080554464	0.905242	0.9093401115579182	0.9279240614917822	0.9219234314010779	0.930135	0.9307680592455105	0.9411054984712108	0.8591803210321847	0.9008037970561323	0.9445088685632875
147	0.9362850281546956	0.9282391087222257	0.9159330622354147	0.9393338561586401	0.9451603931363437	0.9228865688052085	0.9281318647544031	0.939688	0.8314864629694434	0.8958516461064407	0.9384578139338812
148	0.9245031725019628	0.9353598214444147	0.9389457099495034	0.9244415380816182	0.9348584406793493	0.934741	0.9283919285273788	0.9372086086587551	0.8118275923712763	0.8697443397723882	0.9444617768612497
149	0.9028311555928802	0.8828239557638811	0.925158	0.9242246689952931	0.9265606358672849	0.9308695359524305	0.9311690407425008	0.9218027429399989	0.8503054443383569	0.8852550043218561	0.9353922599174813
150	0.9302560207542724	0.9275532712808462	0.9319411801979717	0.9002697489065903	0.940626	0.9416250350695481	0.9248738658022282	0.8661654577000997	0.8524854780640174	0.8544779630218408	0.9304319907133278
151	0.9237254461468476	0.9224530125755094	0.9179122225297369	0.9252477435906447	0.9312594493787987	0.931434	0.9141347622085254	0.9316960767716226	0.852428	0.8569737742063666	0.9323553145684357
152	0.9143345395994705	0.9307737537235062	0.9320734162496088	0.9096177238634695	0.9333175204743716	0.866991	0.9295859300627174	0.932967	0.8610408333888657	0.904655	0.9256381910701461
153	0.9164996701748451	0.9156250863794597	0.9324831986732642	0.8942111993219496	0.9057555294289698	0.920829	0.9241637813438767	0.912622	0.8491552931185347	0.8891958766262528	0.9370506743050618
154	0.9269598312404064	0.8941648912755478	0.9208882543570135	0.9256758411487531	0.933173	0.9345908826823757	0.8994631961706097	0.9298840525574081	0.8560852871473219	0.8724062983598442	0.9242339371343301
155	0.9374130540540582	0.9329332853840924	0.933075	0.9336022306520142	0.9358589201003729	0.9364380209381465	0.9280421019078701	0.9002789606060396	0.8556807721778652	0.8831127513361063	0.9202864552764282
156	0.9179880304093612	0.9291883157734889	0.9239194858528408	0.9262772206889524	0.9353721456070156	0.9395329020323129	0.9303382205948543	0.9332097611996617	0.8447043920634697	0.8681308038873375	0.9338165102115927
157	0.9377187122168885	0.9244813887166365	0.9160170641042806	0.9287575114159502	0.9311166624472327	0.8951314358309352	0.9283965495001124	0.9443827997159663	0.8151595227523758	0.8950058497052577	0.9243623806760827
158	0.9142254651658243	0.9280933977419105	0.9187211412640127	0.907783	0.9490643921613877	0.9159522588003443	0.9207915649782932	0.9257969080889934	0.832035	0.8416570849790489	0.9141528443588006
159	0.928037	0.9223308674084366	0.9420299635903598	0.9065659685934787	0.9284558765030739	0.9316383146956089	0.9135618801989414	0.9247669894003152	0.8552893063424388	0.8819721837030275	0.9278355440068308
160	0.9188421011603867	0.9240992913446546	0.9203209703659332	0.9112493275818504	0.9189653301777715	0.9045550588703521	0.9251819629708214	0.9224269497719726	0.8428753353400515	0.8561523170100149	0.9322580172998652
161	0.9369452777578403	0.93467	0.9198756409241787	0.9292389100316047	0.9319810666391672	0.8994891058650277	0.9107896799812216	0.9053763984028691	0.8652762247676901	0.8874407489094734	0.931198
162	0.9320242014845794	0.9330511093070507	0.9263640677380565	0.9145582003914086	0.9368982216911643	0.9262145150820347	0.9214051284379055	0.9246318689281925	0.8652451441102758	0.8380207939820715	0.9449434034991642
163	0.9237577267896098	0.9278651218706707	0.9287161285618308	0.9130378563932561	0.9455261754016198	0.9215533187310112	0.9208967299657983	0.9046210976163007	0.7993990096844996	0.894023	0.9355864047748434
164	0.9176854873692631	0.9274932880776259	0.9296906753434276	0.9071790008525323	0.9335483580836883	0.9306023844610195	0.9050697187232675	0.9204761520451679	0.8326134853023288	0.8447184139876761	0.925219
165	0.9168383464941978	0.926584	0.9164995808761351	0.9277296451282647	0.9227793379834386	0.9384823117548942	0.9100301142201173	0.9199160702564051	0.7629874256897857	0.8584010262074301	0.9307305059024006
166	0.9172000809543136	0.9184249266157299	0.9007504643473281	0.920406	0.9313581699190374	0.9380525891494681	0.8957404276658987	0.9277926690990113	0.7946851742305622	0.8976813265519407	0.9330150273403937
167	0.9317118246870387	0.9173612192157538	0.9412905325000317	0.9323493393287627	0.9274969805494462	0.9310371013512575	0.9159339600364532	0.9270089454496865	0.8087284529302239	0.8867887237981315	0.9392619923127098
168	0.9374334075162708	0.9209437269268123	0.9145747533449873	0.9126244519009656	0.9244260695669109	0.920834	0.9292385406695484	0.9417404840233233	0.8200857637135373	0.8752526429428786	0.9116745918690705
169	0.9246055567276757	0.9342260053212931	0.9307451380840611	0.9157840049661455	0.929636	0.9401831019066736	0.9263782417508932	0.9363703091381747	0.8585097345287562	0.883634	0.9314104109018307
170	0.9326083006302737	0.9284772328458667	0.9307663667940789	0.9217642975444417	0.9368455337435037	0.9263337802245148	0.9196331186996736	0.9341957763321652	0.8469229866098549	0.8528580448727326	0.9330275609214425
171	0.9181417662568173	0.9305649053228229	0.9181397596076485	0.9213172083079763	0.9423208400857572	0.9361257474901599	0.9290523107972244	0.9327246469793239	0.8253889681510246	0.8889974397329167	0.9340941304852869
172	0.9044548408129405	0.9098270176952857	0.931627	0.9267568522549652	0.9380938924285613	0.9282185198524826	0.9235690619212629	0.9136598313544844	0.8077773733095042	0.8821038720772396	0.922664
173	0.9362041832236108	0.9143957422240478	0.9060060123517689	0.9064723974970719	0.9145867032870563	0.9192924965037639	0.9254203953872946	0.9212448647483223	0.8315	0.8653889108165279	0.9118696827332348
174	0.9377163271665161	0.9247166025255253	0.9370828022903922	0.9310788269776161	0.9340814366251389	0.9378194818704245	0.917157	0.9236231957689873	0.8399587258029257	0.8854703671434868	0.9138532749823453
175	0.9295968447171854	0.9343813190367289	0.9217230527458532	0.9382072399915476	0.9294085980424887	0.9162274308911172	0.9152869392271153	0.9048688156983319	0.8500945214561404	0.8754018460640429	0.93273
176	0.9337362443303475	0.9136117229733748	0.9266058926721762	0.8936810048065681	0.9484692751163148	0.9376150703519689	0.9243979808290463	0.9092713938243578	0.8550612049993636	0.8905026683516057	0.9271641700305246
177	0.9356671101826676	0.9332712265453734	0.9367186161586436	0.9379727761863088	0.9399343637729096	0.9409785953732019	0.9167698265905616	0.9228202564073572	0.8382781633214087	0.8879063887134421	0.9257301110013708
178	0.9314254693234592	0.9210877933359624	0.9217945431811309	0.9238438903143528	0.9322264912848681	0.9255984875714268	0.8887012980338465	0.9044983079352791	0.8490200306879427	0.8928256180588119	0.9351709788835861
179	0.929705	0.9290079099233992	0.9258139823487184	0.8836565337530257	0.9308947759454741	0.918968	0.910601	0.9275271820433033	0.8467320214208347	0.891045	0.934174
180	0.9127724385098465	0.9102180716199428	0.9396889980508688	0.9399225207327198	0.9445325530733146	0.9229636819452803	0.9110928807948647	0.9221621199881384	0.8496310603631296	0.8980617465819538	0.9334935044079244
181	0.9359293494198002	0.9240729276196511	0.9145217989920289	0.9146152049661029	0.9332095133757825	0.9386334817375099	0.9259259631332948	0.906049	0.7992774005308227	0.8713385346915108	0.9324877738176001
182	0.9282041866669687	0.9324109061232604	0.9312162034331786	0.9048206843468375	0.9369412885497079	0.9267640823183331	0.9248012885541672	0.9257101435396311	0.847314	0.8898709388040128	0.9307244025664181
183	0.9342472952300073	0.9236085683007708	0.9313571002954942	0.9087652016939373	0.9247231451764008	0.9164811692619438	0.9292692316598657	0.9406536761198413	0.8384566494390293	0.8666857278038483	0.9344573322117121
184	0.9235239363490504	0.933111	0.9355484909791224	0.9029063382540571	0.9334991193120504	0.9427279616969891	0.9048945435504158	0.9208742706134789	0.8278979819174666	0.8872255051685944	0.932645
185	0.9230798176300791	0.9320037061118112	0.922876	0.9301746588787562	0.9436049979356766	0.9305342015517121	0.9315565222199125	0.9387694585120291	0.8299840913273875	0.846604	0.9146880072095351
186	0.9324016817536845	0.90537	0.9257966780435467	0.9244149849859159	0.9362639044579788	0.9260889925638274	0.9005804202135067	0.9238583767659513	0.8404508775830969	0.8573687232347648	0.9436112709465547
187	0.9294154339409245	0.9284351705063768	0.9244455986455189	0.9170409142183867	0.9337071009886744	0.9399887610723487	0.9203730504038093	0.9326597275614058	0.8051808489863219	0.8694743578701994	0.9219043961737585
188	0.9329862000860485	0.9139799756931443	0.9325266478365192	0.9154774030164735	0.919749	0.9325346856309208	0.9157831746165802	0.9118360677645715	0.8510661386698081	0.9054891485243112	0.9335053014005912
189	0.9200156713971902	0.8965428891698906	0.9106511718488008	0.873052	0.9394971122386262	0.9297630301623498	0.9083388442902781	0.9107515006181967	0.8230893868496482	0.8546889135458229	0.9387355717741757
190	0.9347176750377179	0.9104957816426453	0.9240387954261234	0.9258839949733626	0.9367482569581747	0.9206062371873711	0.9192119119588792	0.9279943801948796	0.8511710974904898	0.8844408510053792	0.929663
191	0.9294719772863982	0.9282616496173286	0.9394830822519245	0.934143	0.9290821742185158	0.9423538941411852	0.9223162142607199	0.9088795908843561	0.8156569436743224	0.8566753547444712	0.9250626933774312
192	0.9205583276984383	0.9362485931637236	0.9322357184076117	0.9076271127474886	0.9452153739269943	0.9289471220535915	0.9128215387829279	0.9253003212693482	0.8488270940053649	0.859957	0.9401987390456336
193	0.9402770348801541	0.9319965256573498	0.9309710405990805	0.8983009194632998	0.9210504654085296	0.9298977661473273	0.9189722700200117	0.9061308427246851	0.8562090509839066	0.8875755166779977	0.9293170333378862
194	0.9285915375902002	0.930298	0.93185	0.9331557267667626	0.9362162442641998	0.9314753611367328	0.9166565526794036	0.9129478381171694	0.848048	0.8653628583840631	0.8963413039457138
195	0.923642	0.902759	0.9206156824114216	0.9257801272853691	0.9310652764168671	0.9243145545228428	0.913412	0.9284275014922239	0.8380742633259382	0.8907876251047432	0.9325530484942866
196	0.9283794638911316	0.9005354562143096	0.9183864955819995	0.9204974299796839	0.9388489736632227	0.9377326071231855	0.9352741890347847	0.8683115844160371	0.8190541868474617	0.8635807682413393	0.9200304421377197
197	0.9310976481579731	0.9181842359595456	0.9159329574515509	0.922558	0.9183800596775995	0.931667	0.9134464796529357	0.9313011127379085	0.8702302631578948	0.8615064687544619	0.9471711820635264
198	0.9264489620587293	0.9262091612358726	0.9360556646811367	0.9025443461858433	0.9216170004107067	0.942418	0.913207	0.9318303293417286	0.8264586153117677	0.8853039152291724	0.9217855895934376
199	0.9322394157604155	0.9010321769262375	0.8993720004667717	0.9174311418201632	0.9202033194667365	0.9273802320558946	0.9355723937634189	0.9176148989962603	0.824703	0.8915805499923818	0.9323642266400664
200	0.9208456534363654	0.9208989406596083	0.939157	0.9094430923510228	0.9353377792328796	0.9142971575609845	0.913817	0.9094043611888876	0.8344460745821017	0.8877907496890649	0.9227976101043086
201	0.9027469433593224	0.9101510496306715	0.9145680115080678	0.9237004830096741	0.9007590329305312	0.9066015571073218	0.9338158877954491	0.9392555089434174	0.8623087955221108	0.8752720382614614	0.92724
202	0.9248441775985974	0.910894	0.9053520003021023	0.891471	0.9299157322285836	0.9256596270391311	0.9193028801040487	0.8975543919208276	0.8420590360504573	0.8970741537838035	0.9321060759387334
203	0.9308860839505029	0.9023667639083642	0.9243962838760404	0.9120074062807118	0.9281930153598112	0.940898	0.9255804830295399	0.9239577602621203	0.8005845045081955	0.8857754575053417	0.9186511232779558
204	0.8965477192169268	0.9345991979352013	0.9333500998371059	0.9283435577876012	0.9363898184161834	0.928027	0.9081410296050171	0.917118	0.828835	0.8871532113676938	0.9300490021928852
205	0.9223355337933059	0.8929830005648107	0.9338898294408305	0.9128843192868807	0.9246635450692859	0.9368476151976359	0.9235398172540452	0.920617	0.8216899798098829	0.8807998339296544	0.926103
206	0.9327741303767662	0.9300864684418702	0.939447	0.9181923030245404	0.8946367082777662	0.9387740619581028	0.9036962132520985	0.9245295864861466	0.8576498730200444	0.8400957388407034	0.9302387155032127
207	0.9157487307016471	0.9242892305615702	0.9032871511127939	0.9310743983519896	0.9359331199540244	0.9392989414906472	0.9221056698835747	0.8851944921307663	0.8407404361604027	0.8938288542853038	0.9356491038653413
208	0.9183833416252342	0.9215467857896844	0.9373965260090202	0.9297371379011836	0.9355507503023144	0.9150954901509059	0.9067935513050679	0.9174532598025021	0.8598488719622437	0.903108	0.9434009874981786
209	0.9310025299310556	0.9169063491620294	0.9319293389779334	0.9177701545739135	0.927881	0.9260478347748793	0.9242983711656754	0.9330912190915929	0.8215301773551644	0.8789605722114301	0.9294035701771396
210	0.9371147185222084	0.918288	0.9125318961386938	0.9312323565815831	0.9295982493350475	0.9334140664990623	0.9033743558418447	0.9256319476608647	0.8488250279253011	0.8921179114189024	0.9074926309276604
211	0.9227617794166726	0.930702	0.9318639455066978	0.903145	0.9256728570405077	0.9287258356213024	0.918098	0.9135928212838774	0.8702112854251012	0.8854567849561192	0.9281176749807722
212	0.9459831889331723	0.9177970097355856	0.8792712499181533	0.9122248958743652	0.9274957591208646	0.9246339940939973	0.9296179302530191	0.902447	0.845535	0.891592	0.9313305984034764
213	0.9227189321898449	0.8869691434166159	0.9306994431899623	0.9268197320091315	0.909124	0.9258759262377034	0.9144552687398392	0.9340170552703468	0.8486110944794425	0.8965921539135389	0.9205593393260553
214	0.9176983357437637	0.9003227074440809	0.9231422195279236	0.9193976003942557	0.9223054350128916	0.9314355691388683	0.9079931420318001	0.9026767386922617	0.7853415363409465	0.8945619345487326	0.9288754705496801
215	0.937421	0.9162049052871274	0.9243096697453458	0.9009132923767346	0.9402366869247998	0.912596	0.8993689385600254	0.9274822778167592	0.8535862807870439	0.8875847426201121	0.9063261594818095
216	0.9355618427432209	0.943423	0.9247015836063031	0.9041919719189081	0.9250933997554923	0.9354113452111507	0.9369932388514365	0.9187541600633499	0.8566086088127703	0.8932929882138722	0.9464421595781555
217	0.9182334541146967	0.923286	0.9294271090523298	0.9280359201007645	0.9201117266875736	0.9132127156995844	0.9229894729580075	0.9150137214500341	0.8582263815906472	0.8913628090600848	0.9317896917277754
218	0.9276938383479999	0.9273066235815884	0.9189033157011686	0.9283569079835428	0.9280170525702041	0.9342299424293031	0.9251919373153773	0.924083	0.8146097107241745	0.8935734081046399	0.9383432186752829
219	0.923955	0.9269242922037848	0.9273246607075569	0.9276500500566031	0.9471168556348648	0.9127836485954425	0.9201234863649224	0.8621649443127201	0.8383289793487883	0.8986445258786268	0.9325907872486884
220	0.9358436806533833	0.92195	0.9360942879765247	0.9244580415209498	0.9194635003491749	0.9315615226986597	0.8897877186981988	0.8889738773737345	0.8486567411549838	0.8763547538123153	0.9400244318545551
221	0.9224934952107322	0.9255888964939901	0.9239667041689898	0.9201676442501996	0.9337111529402264	0.9423343083767677	0.9315990199864126	0.9203374157436667	0.8619460080213524	0.8742758722821584	0.9178436838121156
222	0.9261815099728182	0.9054333068217788	0.9242098482560758	0.9084055161540995	0.9144629228942263	0.9296799156611976	0.9054956059402514	0.9234160883078522	0.8016759829832862	0.8836746210662897	0.9311257377512342
223	0.9318404666033778	0.934003	0.9388122874711771	0.9211266805391964	0.9201000944367378	0.9339244566091479	0.9143403371623294	0.9304641825423046	0.8611222826401095	0.8637531371590911	0.9069534423858837
224	0.8917109879868745	0.9216137905121004	0.9390575765330378	0.9168165241709858	0.9402839573270527	0.9221624125164017	0.9208517248845957	0.928033	0.8326983781461561	0.8811688166457894	0.9205647882870692
225	0.9264935910596586	0.8955188293954118	0.934781	0.9223380453144081	0.9361807906475462	0.9433021854579353	0.925753	0.9293943642906167	0.858137	0.8933679628780048	0.93723
226	0.9129210139886819	0.9298885037146872	0.9118389954629555	0.8787922195004598	0.940487	0.9254073290319765	0.9208149495787659	0.926224	0.8643770781154425	0.8811981838623063	0.9373938075757234
227	0.9151326963193006	0.9216168710642678	0.9374293624339592	0.9052326541858519	0.930848	0.9209405774187556	0.9264316235601064	0.9295614684021923	0.847388	0.8555415260338162	0.9337395184704623
228	0.9192523803480226	0.9112387752179036	0.9309530874586005	0.9252807986088033	0.9352542327211844	0.9255849406540306	0.921532	0.9156042177078233	0.8373175204159459	0.8736131324099037	0.9373169492158709
229	0.9382905838303796	0.9221158148626087	0.9115791968775492	0.9310914303632781	0.9248573636572563	0.9325089175082226	0.9345034622171838	0.9238949670949604	0.8238173118150721	0.884634	0.9179658042307212
230	0.9408375847059401	0.9107605915042074	0.9310127204985383	0.9034701076497721	0.941267	0.9410841825025863	0.9308189418597003	0.9088110502482478	0.8334714144758095	0.8889371698901445	0.9360464412307296
231	0.9379630359834765	0.9169816883875258	0.9154142184039694	0.9163891526380392	0.9164078047309474	0.9219386131518749	0.9249249210720246	0.9203007943199936	0.8610792499109985	0.8997649661388496	0.9379493976500034
232	0.9254040043353096	0.9143639584475355	0.9344009665241271	0.9172399459211271	0.9383673809828221	0.9359856926304473	0.9237200526055431	0.9268492855409102	0.8571284415200638	0.8651365786870716	0.9195512843231647
233	0.9327651799656657	0.9270877019867613	0.927185	0.9202454610047635	0.9225261667634894	0.9332213000756551	0.9220757591068806	0.9306378611271756	0.8445354379837232	0.8895275628412879	0.9247034216983243
234	0.9310028894571908	0.9386584600643079	0.917747	0.921806	0.928601	0.9168440262351206	0.9275751602609766	0.9129370251006115	0.8402923728865708	0.8909970833140911	0.9397581603527333
235	0.9200251570892488	0.9249663614657091	0.9087554969211561	0.9144832762784181	0.9213641468102237	0.9358126547686239	0.9262147005876816	0.9106850731614192	0.819239	0.877189	0.9185324206276549
236	0.937835	0.9104328207756184	0.9316771471518706	0.8856571555053242	0.9320070577063211	0.9366184671673916	0.9295958510200926	0.93206	0.8482691254497615	0.901642	0.9313649146465576
237	0.9213358945086504	0.917702	0.9191967132675747	0.9082561771731309	0.9312288905598449	0.932864	0.92319	0.9345002823709736	0.8569638132111377	0.8785933219558609	0.9385036659241378
238	0.916895	0.927411	0.9376279214886182	0.9247278893800064	0.9246990354629361	0.9074801463093936	0.9318259952556203	0.9356566024471182	0.863672	0.8910314903261584	0.9416300164080164
239	0.9261288121181094	0.9239189080410471	0.927146	0.9247540873180923	0.9301782168804702	0.9204772885797319	0.9371128689209101	0.9361308825605641	0.85363	0.8084158319327933	0.9395719572760928
240	0.9250533231345431	0.9296615231760721	0.9194456330188354	0.9283366990236946	0.9113511648146786	0.9137395556595607	0.920501	0.9329261846366171	0.8529072039635491	0.8879776620218274	0.9369505940110112
241	0.9225632575728888	0.9241973028287992	0.9205464371460556	0.9160848766700365	0.9245143104953446	0.9288180479416869	0.9129448301459667	0.9418265085659115	0.8449724321779121	0.891381	0.93934
242	0.9253344277274013	0.891794	0.9343018693462112	0.8709057064696548	0.9432226360215041	0.9271317161025103	0.8955489325953456	0.9319187092388251	0.842314	0.9010324430190422	0.913627
243	0.9298773335520754	0.9242338227515875	0.9147622304067502	0.9276213924639705	0.9283360618473503	0.9179957344435142	0.9256960221451961	0.9006190897850069	0.8186130266038469	0.8986062789221151	0.9027188832550328
244	0.9346762426868659	0.9052706300643781	0.9352280197381051	0.8969921982003228	0.9097948134306261	0.9406892206000612	0.9133137040325181	0.9231929591413419	0.8624194654564489	0.897617	0.923502
245	0.9143770292523651	0.9258864276889626	0.9200695784628957	0.9332495726838901	0.9469900237109614	0.9196174077715521	0.9309677572328587	0.924805	0.8457488701616525	0.8695865881524361	0.9439074533565156
246	0.9309269767961463	0.9365005749313322	0.9357559436333314	0.869135	0.9193040774107564	0.9325959970254677	0.9049827981252614	0.9079407400828972	0.8577270677380769	0.8837666384471748	0.9404521376036669
247	0.9169811282746146	0.9336170558690013	0.9235239175153502	0.9204114094390348	0.9251812439140249	0.9270831094282055	0.9141012402598434	0.931995	0.843414	0.8839293042699669	0.9324262768889849
248	0.9240568938915753	0.9052521610353657	0.9349498981241694	0.8562930151106225	0.9401838742084905	0.9201681907401494	0.9221990312221571	0.9112275758113424	0.849981	0.8972422228461117	0.932862
249	0.9338099246375468	0.9340428036359625	0.9280880117011597	0.9012485239995344	0.8999286965911271	0.9251428743661623	0.9269830242317247	0.9185848803677574	0.8067414067767377	0.8691417641873812	0.9285573551085518
250	0.9350792226356962	0.9180502405678196	0.9203003150079683	0.9187199825829925	0.9354755614276824	0.9337859519170615	0.9276955975151734	0.905129	0.8494264048689398	0.9047992805359217	0.9453465144466381
251	0.9397	0.9322294998228398	0.925911	0.9286424681312709	0.9315425871286902	0.9253621446662368	0.9287821747509908	0.9247895579394815	0.8170815131048303	0.8990559161163939	0.9162074722030163
252	0.9378483114454728	0.9322273739638937	0.924161	0.91598	0.9347263090729309	0.9359920322307783	0.9066328763399151	0.925235	0.8279008432090583	0.825968	0.9362351960603446
253	0.9389525639086197	0.9276118256399971	0.9293110328036168	0.9191385650989093	0.9349741409184209	0.928765	0.9230981644058346	0.9405826216189079	0.8288510792359304	0.8892873057023151	0.9313876091921339
254	0.9314465817606762	0.9242123752224104	0.9311268474403636	0.9202057683386188	0.9230657727687963	0.9236601826989922	0.931579	0.9270997963622112	0.8561984173052734	0.8753297247221052	0.945708
255	0.9181191595362571	0.9240580198336493	0.9018205733640788	0.895875	0.9342095758416027	0.9254647822732154	0.928248	0.9351210311538847	0.8527742423218834	0.8862468159789488	0.9358439936182871
256	0.9375557792760987	0.9164982694519428	0.9296928725555987	0.9090683819165547	0.9266830476060472	0.928956	0.9240474802270517	0.9266319746542798	0.8080051906532506	0.8929520794736852	0.9215595392413231
257	0.9410269188951182	0.9404001485683646	0.9429211318217321	0.8829556832573098	0.9377687626430287	0.9336590847852212	0.9131730911179402	0.9318388708373883	0.8409841580004473	0.8856657007700472	0.9470076637167482
258	0.9208047310519513	0.91944	0.9329720110442935	0.877502	0.9257225490049579	0.9307356405201731	0.9347690376832523	0.9115941960265544	0.8583903895612564	0.8694545005020373	0.9337302362368577
259	0.9249603707333789	0.9195833106428883	0.9308713012136833	0.9127398148457179	0.9321361877124662	0.9166815357990779	0.9173357678516345	0.9162993079504241	0.8521392245433723	0.8857593054875507	0.927131
260	0.9364171035315124	0.924214	0.9142099654180508	0.9115774728609662	0.9042624716485482	0.9160962664058793	0.9190067954551021	0.9301123488135731	0.8201733472570317	0.884614	0.9264927016181029
261	0.9173517114994286	0.92317	0.9323907051442651	0.9218429415633608	0.9076582536807165	0.9323137806556377	0.9210127031033851	0.9294130622352473	0.8436733247086899	0.8909742465492242	0.9227080209863233
262	0.9306467224803807	0.9342098156438935	0.9260782632597582	0.9240449798933874	0.9333501513031408	0.9252237630688632	0.9237552270952101	0.8968549807645724	0.8648800332513151	0.8905395273792415	0.9321026468060893
263	0.9240381774895442	0.9206438772948485	0.9254251294899514	0.8991964708748519	0.9381258322719529	0.9301320431239495	0.9180547095837552	0.9172609525410106	0.8575533010528433	0.8904498493396439	0.930409
264	0.9354219890061971	0.8883651158998531	0.9250697412723743	0.9186185108810776	0.9263521628507403	0.948349	0.9261223894590198	0.9137731532252018	0.8536335363886769	0.8937749480792435	0.935703
265	0.9261040165369862	0.9286666218979497	0.9309356287038866	0.9144789940200162	0.9277052839907691	0.9270958865915886	0.917263	0.9230761136853816	0.8515230526027078	0.8684814620393677	0.9344006412263726
266	0.9380531063677486	0.9316194751791218	0.9195870255971879	0.9341560421577598	0.9221995177483293	0.9260708016871086	0.913272	0.9301074445035163	0.839719	0.8979178634579744	0.9427080060662971
267	0.9233045031964465	0.9357271321178088	0.9399196706223385	0.9166228229769895	0.9267001933440623	0.9298621933024126	0.9267543916507437	0.9157212283620508	0.8504325948935099	0.8865431664079347	0.895607
268	0.9261210333945432	0.9350588367761623	0.9109846847123207	0.930207	0.938615	0.9319000423634136	0.9290620446324568	0.9324110084050607	0.8291331181912382	0.8996933115676061	0.9463156767421094
269	0.9387851272384251	0.9216055686928644	0.9276043241395028	0.9304962724127545	0.9441860362298597	0.9321197266780852	0.9163753971670813	0.934812	0.8507453530386555	0.9009727312340838	0.9194152608926016
270	0.9340774507151695	0.9215373833543429	0.926846	0.9010213621105642	0.9362058949788704	0.9210287242344383	0.9242839256808653	0.9244884147293747	0.8458259103623865	0.8862931034138137	0.9275818598622548
271	0.9279736233443098	0.915699	0.9211543443437544	0.9075902135664957	0.9363783710569823	0.9333177588148326	0.9118386920950027	0.9299211358624704	0.8548470643684016	0.9001632875575405	0.916504
272	0.9353058495520729	0.9357863668356008	0.9051015890155655	0.9275007776516329	0.9250562770765021	0.9388717010508298	0.925883	0.9259265211671004	0.8620408966131978	0.8649066512765096	0.9238960017203994
273	0.9437619071404179	0.9299321964442111	0.9190029217820099	0.9300019805484943	0.9488612946146138	0.9294140980046375	0.9148345541876771	0.8935053774063736	0.8592267663200062	0.8804898293366507	0.9216123529462867
274	0.9336122527749905	0.9125587346569571	0.9269748633327453	0.9080476043789187	0.9332029873311966	0.9268506113229842	0.9028922229422062	0.9109652929390596	0.8270596376132895	0.9015199564134099	0.9421434902479872
275	0.9193409866762671	0.938481	0.9332473272077996	0.9217275046647054	0.9298881804026764	0.9132642924055484	0.9053567013810003	0.9246399804825866	0.8224269959515526	0.8848577725512589	0.9295191152123362
276	0.914756	0.9383060904508308	0.9161581926438451	0.9233792587462719	0.9370452233212039	0.9214073711931253	0.9082765979431734	0.921412	0.8384555568595327	0.9015499662343697	0.9249282773285672
277	0.9384227704493499	0.9199303172582212	0.9365413012815224	0.9228459723157054	0.938012	0.9107768976421089	0.9083462874832735	0.9308105276393972	0.8158705606185664	0.8798890398929297	0.9333322929017063
278	0.9206864814090877	0.9148784893132942	0.9314494058399345	0.9322336762726113	0.934204	0.9300271804279641	0.929105	0.906576	0.8414142737784691	0.8911907533134092	0.9202191108843278
279	0.8994114753873602	0.8997119914743885	0.9439177736351573	0.9137545181545291	0.9323867441545568	0.9282250290713548	0.9125584065038739	0.9427494527704446	0.8593678275212289	0.815826	0.9361994359853995
280	0.9344015198959786	0.8984435995613668	0.921627	0.9144176650763586	0.9280551655671563	0.9351547646170129	0.9283519552123686	0.9255376425723493	0.8465027212939262	0.8303353402827817	0.9236588659555859
281	0.9234200331522077	0.9190975404929296	0.9021449764300992	0.9325084790615986	0.9337090181688963	0.9222244319563676	0.8932069562128523	0.9216399299516606	0.8669758657040634	0.8949265111642443	0.9327118206680891
282	0.9355225209166063	0.9336117595688047	0.9026107481050079	0.9151830260575952	0.9289887778711908	0.9330382201452297	0.9341988367072337	0.904822	0.8482811687873404	0.8723566835256604	0.9304629383689145
283	0.9351019223127521	0.9230493149534804	0.9313434072032512	0.8941664086032476	0.9208145877696129	0.9362687072589154	0.923497	0.904806	0.852723	0.8599177398720204	0.9481886117718858
284	0.931761	0.9069576624116409	0.9086655997240853	0.9234311717088591	0.9258489069411888	0.9100861095802325	0.931769	0.9292765950899472	0.8631531045218732	0.8910109567295948	0.9361241809020903
285	0.927457	0.9355739722551311	0.9340787329297884	0.9053880117772078	0.9453364784199481	0.9177196826669997	0.9294900987941546	0.9184716807638573	0.8062	0.8962248622907046	0.9320188031290597
286	0.9203734543804111	0.9134133051476925	0.9331299045370351	0.9301409176460858	0.9312025318552138	0.927045	0.9060974402769975	0.9326188395145197	0.8303534693134302	0.879619	0.9275955861972441
287	0.9206203189137064	0.9018880782572765	0.9306912283916376	0.9210188422426474	0.9364709359377763	0.9185061105503416	0.9089945850168609	0.9270472431114943	0.8124094080529383	0.8965826199399617	0.9195827682396682
288	0.9263586699762333	0.931687	0.9234971904817059	0.9348003158589985	0.9357147893576825	0.9321116640083114	0.9200810574936085	0.9322985883612733	0.8247497775578723	0.8992673984791026	0.9168175648169715
289	0.922449	0.9355048622036537	0.8929603832208344	0.9116722141332704	0.9306855987287496	0.8936548352239825	0.931972	0.9378070765695421	0.8721064814814814	0.8911612974593611	0.9422994722492625
290	0.9214905599375144	0.9209421183091826	0.9258759441493655	0.9230382920428771	0.9341062243673135	0.9340932115087002	0.9208770551157405	0.9255579345845859	0.8517317293168705	0.8991224370004246	0.9219138228493935
291	0.9271091629090874	0.9385044896462588	0.9195374500296005	0.9170026440249823	0.9162970569499097	0.9393960784300316	0.9000218587617018	0.9080114734004813	0.8418066404335269	0.8436097034616855	0.9333523055718999
292	0.9214783542003977	0.9386712288866593	0.9276182462577836	0.8958167200232211	0.9401199070755277	0.9257969927812366	0.9108567666950667	0.9198101124997727	0.8551519279908228	0.8752025273448636	0.9311919226532896
293	0.9118446111804096	0.9219479325419696	0.9268326380382355	0.9212146665076517	0.9285675043780858	0.9295444990912082	0.9230845345122086	0.921676	0.8486184304450151	0.8971988959606647	0.9312897517230672
294	0.9282831473495504	0.9338971938775334	0.8911024735874244	0.9302340887253785	0.939947	0.9376509636354009	0.9322714171971122	0.9276306420812926	0.849304	0.8408872048554364	0.9093724504675982
295	0.9147850988776265	0.9195121478559233	0.9221766562928672	0.9006618430345216	0.932312	0.9429140214350462	0.9158347879332958	0.9018357071800299	0.8647164109211949	0.8387291829855585	0.919867
296	0.9165536764034219	0.9386596184413935	0.9292252827435339	0.9224499992788254	0.901189	0.9286764559424148	0.8987714540582303	0.9330568748845657	0.8288888505513531	0.9030117817689386	0.9376885009436574
297	0.9393413550404813	0.9326847393600377	0.9389067328313246	0.9119165940164325	0.9029145395809333	0.9054289036261497	0.9097941470109185	0.9034282815226057	0.8355088852856212	0.8731529278798346	0.9024352140247159
298	0.9259717793469215	0.9057558644752448	0.9062632242874751	0.9304244978797307	0.9433984365648758	0.9179614942970149	0.9238033619580704	0.9346342236045928	0.8565509354797975	0.8561631215836952	0.9353973084994157
299	0.9253963982824132	0.9157725429865439	0.9289930716256317	0.9002712673546905	0.9291075826434405	0.9320768337932762	0.9093582123462088	0.9195258199524783	0.8427790934938306	0.8946785670394566	0.9402524197235109
300	0.9228042464772354	0.9299171913074017	0.9267505764569415	0.8802152345199882	0.9330623468563379	0.9365671158832103	0.9021006653983394	0.9178731542859445	0.7808777598527388	0.89154	0.9247346902417645
301	0.9313817603503791	0.9131084730059988	0.9237409703862162	0.910098	0.9075819383052827	0.917361	0.9190386966811461	0.9354351604280668	0.8539285228075717	0.8922592710796953	0.9272600829949802
302	0.922656	0.9125543381141134	0.9110538467133034	0.9349379546482264	0.9319072470787644	0.9186649427677872	0.9133159060626671	0.9120267303419939	0.8432737495437563	0.8763562194502926	0.9422326000632469
303	0.9276556486729094	0.8743495805022314	0.9203184680471692	0.9154116414342421	0.9394298477663432	0.9403299104855649	0.9069748461360629	0.9232521445614927	0.8447850312466115	0.8823229154534536	0.9410145693428459
304	0.9272965367256701	0.9132466682373858	0.9257801066107015	0.9302334265093936	0.9355938676131244	0.9197177101134761	0.9102513149961804	0.9252343423837902	0.8211958727639245	0.8892950863938923	0.9465401686776805
305	0.9159631786114734	0.9338746525198941	0.9167037537991375	0.9351514592309852	0.9327911445423844	0.934623	0.9265695266195596	0.938957	0.8623125996810208	0.8907889943925729	0.9095379370731042
306	0.9183493092488756	0.9128286811835596	0.9203700858782239	0.9059368578870544	0.9267782230067745	0.9266792677202079	0.9251380173645928	0.9155227360137119	0.8340636807638295	0.8474862105873159	0.9426779619141348
307	0.9287333341810082	0.9317528282342035	0.9242951408293751	0.9232327681623869	0.9212408565112888	0.9223688291214441	0.9270972481512295	0.9214661729739373	0.8560454927487899	0.8687715069698685	0.9050200092366569
308	0.9306778479459579	0.9270069239774023	0.9281390334737482	0.909564	0.9263551498820037	0.9376071324863167	0.9137259573442694	0.9234928743542405	0.8488258517418656	0.8810105402063332	0.9365096991373748
309	0.9202532428074415	0.8812488749565761	0.924895	0.9365326759377887	0.9426332082071756	0.9309594590359929	0.9042452303508882	0.9238187446260524	0.8512771677377756	0.8811343688336515	0.9308441671528535
310	0.9275690781230448	0.9231372269704927	0.922736	0.9201969699903128	0.9217050461807368	0.9348648418100738	0.9151735957532597	0.9316218596479984	0.843844	0.881899	0.9315112046502144
311	0.9261599277276048	0.905644	0.9233424858674334	0.9183067139712826	0.9349684353789031	0.9246422220173326	0.9290318291049927	0.9060102914731932	0.813438	0.8759430589982408	0.9372352721359155
312	0.8957522797695286	0.9296458129162742	0.9262823094553889	0.9136459854535377	0.9181310831665415	0.936682	0.9249210745201739	0.9313643702459049	0.8148769204386782	0.8648353058044654	0.9282090707742949
313	0.9282430102568996	0.9220840783781453	0.9340848552202868	0.9221104626255503	0.9284864796020721	0.941343	0.9070879466415781	0.9184108567429113	0.8559808476747439	0.8778771560806029	0.9272946145617905
314	0.916357	0.9231186321702887	0.9257300360524122	0.9130999630721661	0.9303443821086641	0.9015199292435461	0.9261094901899019	0.9260266539445391	0.8273350137780002	0.8767888757386159	0.9455308510345823
315	0.9320364440071817	0.9205955133723303	0.9310372698670504	0.9023245429604543	0.9239328213263618	0.9239919952813859	0.9293806039153779	0.9129393914257773	0.8320193166763519	0.8932497127027094	0.9313139033500453
316	0.927713	0.9026206378145258	0.9201797030257787	0.9012452780899104	0.9130110399792255	0.9328040733537671	0.9014329726981348	0.9283916440116385	0.8318636376071529	0.8658215370845808	0.9294054706878518
317	0.9251169176589418	0.9325289394005348	0.9295979041325227	0.9192981602575038	0.9378032697620999	0.9278541038389834	0.9286950909379293	0.9332291333385493	0.8253947225427587	0.8958105387030949	0.9447080561416195
318	0.9269843016507027	0.9144613747262723	0.934596	0.926687	0.9475297674867068	0.9240131647418747	0.9201810356094222	0.9321995413029704	0.8584124990382976	0.8651522500399941	0.9316369839954519
319	0.9314439068597622	0.9310466659101888	0.9103032388778252	0.914467	0.9339028911170011	0.9299214814338675	0.9147796830814225	0.919934	0.8555120610068847	0.8836557482528707	0.9365267686491444
320	0.9291368332812476	0.9222095098194818	0.9399004432710328	0.9262918364039435	0.9302741851333459	0.9331957574885842	0.934924	0.9211338938829442	0.8492708302000188	0.8840746785189938	0.9033363934870438
321	0.9330240146049507	0.9255141839315555	0.9266333109515256	0.9196826230629879	0.9365209393699996	0.9430312825215676	0.9125684274543925	0.926458	0.8440877946032161	0.86935	0.9385317322500256
322	0.9298755642488828	0.925368	0.9168619781140465	0.9145562078429745	0.9434080490495584	0.930589	0.9239974543668467	0.9259506727837103	0.8290586661209303	0.8925654693624127	0.927054
323	0.9255428420616354	0.9291927670206442	0.9294136188410511	0.9294258746077116	0.9324253024793033	0.9058055704354042	0.8915114096668475	0.9135650276204851	0.8669117647058824	0.9031745655850426	0.9279496528570517
324	0.9246968935584728	0.8979603822836146	0.9211158984353074	0.921651	0.9460944986784199	0.919014	0.9293445097072655	0.9359957168582063	0.8590211561362513	0.8929782902314113	0.9255018760712884
325	0.9386280599461888	0.9337560263232132	0.9195123639809936	0.933713	0.9203024148578067	0.9244260389505182	0.9092980967298585	0.9233634545504295	0.8516532254843413	0.8736834706039573	0.9236921336386857
326	0.925911	0.93287	0.9208083644206688	0.934916	0.9357511144355244	0.9428610123149576	0.917843	0.9118525298200594	0.8215788768785679	0.8888028281629979	0.9170824849494902
327	0.9306507050925726	0.9385380919642956	0.9378706070444984	0.8796834264682409	0.9236290889874286	0.9382576700648169	0.9211077182449345	0.9020336507820729	0.8469052920837161	0.8899253995698909	0.9044081839901186
328	0.9424546385498808	0.9099287629685249	0.9240132587076837	0.9153688708801205	0.9340188285861057	0.9213477314490272	0.9168677051761217	0.9174547905321562	0.8364159858255711	0.8743896364629501	0.9324567918559252
329	0.9192502290038191	0.9232891837716385	0.9177489156179497	0.9103105781621569	0.9240171501977315	0.9068262510218216	0.9365676463785411	0.9254254419236849	0.8595884594534067	0.8791937705029671	0.9233002549432575
330	0.9223183611797763	0.9259017988852093	0.937536	0.9305276287800388	0.9418673451908757	0.9382839763161341	0.9371889593283848	0.9310596698342266	0.8452236115835843	0.8863174880077288	0.9172505035712796
331	0.9212406541513646	0.9314500610519156	0.9395208825366693	0.9280139923033577	0.9298576971069641	0.9466417420633101	0.9139181884556409	0.9268780239364687	0.8352485192445653	0.895564	0.8911990866065465
332	0.9175562813800722	0.9365964976667527	0.9316345739137849	0.9093471126743332	0.9344368946855286	0.9252603557449558	0.9139025305331723	0.9109763663939985	0.8398939939811372	0.8843685972241339	0.9321265053921873
333	0.9258993256344984	0.9237387447289772	0.9108134484846416	0.8940576310156483	0.9443311338991158	0.9102331134446457	0.9241221839825926	0.911428	0.8328712963461764	0.8925366919493425	0.9114049355842578
334	0.9354374800606052	0.9272699116353083	0.9228296906861959	0.9227104167406778	0.9208994606999826	0.9104956166147343	0.9255367785838221	0.9122106156365543	0.8628944961592988	0.8820056371795411	0.9264911682787081
335	0.9257804648055267	0.9319877106640703	0.924265	0.903313	0.9222499456682447	0.9115539731412079	0.9136111095917437	0.9052611088777942	0.8144548287486233	0.8884998711025699	0.9391421978125687
336	0.927679	0.926515	0.9176149021082814	0.9315614784557127	0.9294909769981834	0.9439968607846004	0.92963	0.9219758658696529	0.8436386291001832	0.8885215976180247	0.9397555580290886
337	0.9264204953259615	0.9155232816030175	0.9387834551878556	0.9092464447717222	0.9470360164466012	0.9347528032027203	0.9314547986020988	0.9213861178535475	0.8342808675944408	0.8815709986573358	0.9267649777212336
338	0.9290193979702608	0.916996	0.9320085524240523	0.9151480246580109	0.9366907713379224	0.9228808201968777	0.917564	0.9196408375450463	0.8412537960730408	0.9011572990658706	0.9323824072094516
339	0.9297576660607498	0.9308238177206234	0.9390635579628714	0.9175417098313637	0.9263825672477239	0.9112410042577119	0.9259071464394756	0.9168554937536658	0.8018304139207765	0.885387	0.9194221362335705
340	0.9193554728630977	0.8990105132682212	0.9297359069025046	0.9049551976774125	0.9340411067625316	0.9273701220979614	0.9259914860081259	0.9147036883499446	0.7874069322070503	0.8906043178911808	0.9370691676615424
341	0.9215131309444196	0.9120694011854293	0.9319694551768753	0.9070587580246309	0.9277765691626974	0.9376621847681859	0.9183009999556261	0.9243494166135732	0.8487216617386606	0.8648218378784819	0.9384531078767345
342	0.9273970743587324	0.933168	0.9298815742883059	0.9179922300842631	0.9202173509600324	0.9217519476328417	0.9201146828284874	0.9384462246973739	0.8480069569392454	0.8927191094908116	0.9134272438474583
343	0.92587	0.9271732917682456	0.9367869853862016	0.9259579808682222	0.9409063694617428	0.9124997587984446	0.8947744649515001	0.9422501532662355	0.8416814281194784	0.8878759386176167	0.9352363976327519
344	0.9269139571810141	0.9294094575794674	0.9383020699210709	0.8737031135655822	0.9409405728532301	0.9278168977325577	0.9264793247175573	0.918299	0.8537544936713413	0.8895811520764006	0.9286683255309197
345	0.902457	0.9355834759319634	0.9189669024095009	0.9234957579544312	0.934491	0.9435370792067471	0.9201884576219408	0.9204688181122429	0.8421596630168466	0.8868010826288136	0.9317841332187341
346	0.930882	0.9088488920464886	0.9231403239437211	0.9237942055685682	0.9357059426168743	0.9267291789428579	0.9293833736232394	0.9240376849332808	0.842417	0.8478253109100885	0.9307984877098957
347	0.9296159515204525	0.9266334052102381	0.9177197337926546	0.8774226631907315	0.9419238908221722	0.9431048665516876	0.9273469797792994	0.925351	0.8424068397966187	0.8727860875141055	0.9208487615109667
348	0.9256944642729736	0.9281789153762241	0.9016694890689684	0.928505	0.940846	0.9273042319538167	0.914086	0.92276	0.8402929070627654	0.8872939050328755	0.9196933179139476
349	0.9304134260696798	0.9259465812118809	0.915451	0.9384018429532055	0.9372899325238322	0.925652	0.8851136136762017	0.9343794296422098	0.8616434270236806	0.8607237291493672	0.9293685826563799
350	0.9342197335113719	0.9192987712822226	0.9209006242753868	0.9235992147028592	0.9125522851189867	0.9436538207059733	0.9096658214279505	0.9172842917217653	0.84624	0.8759181651239031	0.9415120298870656
351	0.9366124794372765	0.9197551503009469	0.9347470491790576	0.9239664603288289	0.9319909974204212	0.9417171793315995	0.9150896368234155	0.9026313689556438	0.856295	0.858159	0.9322515281870836
352	0.932533	0.909934	0.9201216725311981	0.8926988578803106	0.9098077426160589	0.937088	0.9256135364612367	0.9152694364280062	0.8374476851859344	0.8816149995968084	0.9321612397572261
353	0.9223004441956743	0.9302697085944259	0.9271291334719393	0.9245422513696803	0.9334859098249081	0.926027	0.9095145821451378	0.9061964603017957	0.8408890214564859	0.8636022427592337	0.9367260115967236
354	0.9325628491771124	0.9302363812228495	0.9209537421630917	0.9304813678038865	0.9320606039371411	0.9349319398734868	0.9247249836863839	0.9074735884654938	0.8317488899011707	0.8891775621075685	0.9230614092620713
355	0.9218305833033357	0.9387516628155428	0.9303305909015658	0.9119027203532263	0.9330278148197544	0.9267257647715753	0.904138	0.9147416906144197	0.800457	0.8962419207046003	0.9433185074543095
356	0.9412782020074176	0.92581	0.9323670706486972	0.9186166135110465	0.9347575295285229	0.943559	0.9288755309243423	0.9176785739006535	0.8557399558016604	0.8875068264018876	0.9412750158362306
357	0.9105921948139465	0.9362050344419942	0.9368703298497161	0.9345183190723138	0.9102071274151217	0.9396231420367975	0.9301150878008609	0.9221761401402716	0.8239801097313612	0.884411	0.9263272817194895
358	0.924188	0.9204013674510853	0.9120420688226176	0.902009	0.9336704823742605	0.9386166278375722	0.9214101210751382	0.9246668567195006	0.8404780320813576	0.9053635468504332	0.905196
359	0.9232948414218011	0.925318	0.9164480882771824	0.9133275271377118	0.9414959244637054	0.9241402235557987	0.9334905329839048	0.9031307814081337	0.8266175839734528	0.8708985457324275	0.9190903199948418
360	0.9162160134078778	0.902221	0.9317838728682323	0.9190782648421105	0.9338311449519293	0.9410510424071927	0.9293892368915866	0.9238876285178046	0.858276	0.8625323383516301	0.9174621184811061
361	0.9427832626691269	0.9195495627919392	0.9314571168993445	0.8957159288073733	0.9260573338753231	0.924244	0.9188685928664903	0.9235019401836133	0.83467	0.878955	0.9368826727706739
362	0.9265189408890903	0.9170308548562676	0.9154249344783709	0.9180374902326073	0.9196229033378837	0.8987123624675172	0.9013965152247959	0.912106	0.8449320226143617	0.8625156609792115	0.9320146866031669
363	0.909118	0.9077566030882479	0.922764	0.9250151922458625	0.9516232913919673	0.9392947838492242	0.9033084505437701	0.8907558823203426	0.8349796677278265	0.9017461293036989	0.9366749124504582
364	0.9402966245091227	0.9273965301861016	0.9142039338425071	0.9138105374248139	0.9368488259147102	0.9320133474093194	0.9152917554752756	0.9299411126259038	0.8305135814929319	0.8885780843075497	0.9105178397704311
365	0.9272125602466327	0.9027040911043612	0.9297872348529478	0.9217090502659879	0.9291064555410085	0.9434501223140109	0.9201273403184757	0.9181138052608937	0.8520841420887408	0.8893127961616035	0.9206773797348494
366	0.9265192189096182	0.9277703964718339	0.9117404515488139	0.9096209563332557	0.9233314823705785	0.9305257224142498	0.9306036432445394	0.9047271374580008	0.8398956742251104	0.882925	0.9144532770896352
367	0.9323743102085992	0.9253539094415699	0.9380860440332255	0.9147428695018184	0.9477433311873938	0.9307361604432551	0.9088478281484617	0.9279967788874139	0.8337469908637142	0.8900380982522212	0.9471170087266917
368	0.9181248515223212	0.8948095168989189	0.9299239659780226	0.9192677384051708	0.9206550377295837	0.9360922939798416	0.91917	0.9286477152894528	0.8591118003043519	0.8917086446824724	0.932481
369	0.9291723723033397	0.9346725679730699	0.9355143009251257	0.8947488156391876	0.923236	0.9276790208846749	0.8902882523685947	0.9286744447666984	0.8431822401082955	0.9008082368709625	0.9123388953448475
370	0.9238470058123374	0.9226265099140595	0.9284166387183296	0.9157103366565041	0.9437397721151861	0.9345135224621365	0.9248665750157974	0.9268071894548261	0.8524026139318039	0.8850460989858271	0.92412
371	0.9321694469795199	0.9159779880743961	0.8928892838357333	0.9301714318463997	0.9246387752000337	0.9007563346258657	0.9218031895709208	0.9131755747534698	0.8440533780217622	0.8785998970201984	0.9298555973799882
372	0.9134902763302492	0.9289074106236931	0.9388003073362027	0.8811736435170697	0.9116210942762191	0.8977376512475244	0.9130522195778314	0.9143894158938505	0.8242265068781345	0.8875909854452578	0.943421
373	0.9241335822392017	0.9221296987582993	0.9224902653000028	0.9146273709877555	0.9330207318545859	0.9288889920068022	0.9082058594393709	0.9340665382180365	0.8343390646850215	0.8775328846939016	0.9390187026841653
374	0.9031865100102611	0.9207650935689693	0.921738	0.9053538665102866	0.9403599175437276	0.9254526808203623	0.9192802561277533	0.9325943414591975	0.8403238552236088	0.891406	0.9315684295522599
375	0.9196220282403298	0.9333739846825113	0.9155548026539326	0.9244226613435083	0.9191463980176174	0.920031	0.9263713939899624	0.92602	0.8468950232691528	0.8875146765071354	0.9442861648067563
376	0.913203	0.9072277863655519	0.9292949327899181	0.9001492703475589	0.9178760567089111	0.9387992725578526	0.9322850892429012	0.9185755789822342	0.8321485814269789	0.8604672947470328	0.9313796086608355
377	0.9352563374540116	0.9194631152010272	0.9224334188429298	0.9128469332877444	0.9275364959783847	0.9078283816259964	0.9182516395727581	0.9239810681452137	0.7875261576501118	0.8769029187916839	0.9290330516893636
378	0.9296044613699482	0.9158208213195371	0.8976639722018059	0.8980941715058056	0.9190860860564725	0.9234841579311727	0.9192605689017558	0.9222300992184264	0.8545258040024983	0.8989377299342484	0.9118975172780334
379	0.9381943618114895	0.909435	0.9140953963435933	0.889542	0.9283851852777081	0.9240620729035987	0.9132557821056594	0.9266289610090969	0.853418	0.8624085610872566	0.9260420061033384
380	0.9092485804448985	0.9228007756360471	0.9197929054731229	0.9213897437890144	0.9358355906364826	0.9396842161745005	0.909291	0.9398275733926786	0.7988314268626486	0.8992638745849937	0.9336288182006954
381	0.9205375439207536	0.9127696666936168	0.9252900101062788	0.9050169242144256	0.930579	0.9287516496553183	0.9313120613350148	0.932468	0.8532277383092586	0.8931112997454128	0.9053234995675922
382	0.9146997653589841	0.9074511833931577	0.9353167786706623	0.9343652617160988	0.9216639360379876	0.9402685177877256	0.9236466904046103	0.9197798033505493	0.8600803438918417	0.8918809727941729	0.9384917556360812
383	0.9041568550140207	0.9369977011311796	0.9127611760175824	0.92589	0.92792	0.9452839996280463	0.9232950085032307	0.9219918018375535	0.847393	0.8778342993488821	0.9367286468827055
384	0.923983	0.9275554131136746	0.9315172182886053	0.9186093753508557	0.9405083090890136	0.9391143827552233	0.9285502606630868	0.9265219104549639	0.8630975191202834	0.8739940258311379	0.9201389312395513
385	0.9337019447194818	0.9188220761437642	0.931913	0.9093200400553978	0.9373326782259519	0.9229946949566473	0.9278474280978036	0.886003	0.8305831304405727	0.8935872552143734	0.9364649739159213
386	0.9414776172121649	0.9330801766866669	0.9338442675943244	0.911008	0.9335058424211016	0.9120626169163352	0.9236122688584784	0.9261747013400964	0.8627767957136576	0.8868203208584703	0.9208981609384368
387	0.9235708406791548	0.9165285631690627	0.9257252911588674	0.9164845619530607	0.9284486819333935	0.9254497539241543	0.8837164216067469	0.9054865261471363	0.8200186967125956	0.8806869655601098	0.9201803412364936
388	0.9297750120642233	0.9323878106858886	0.9408364084645348	0.9214142163862467	0.9371049469968888	0.9394487331485276	0.9031760838737167	0.941306	0.8537493339439375	0.8933060411130097	0.9098412714902376
389	0.9151659556491464	0.9188492394816609	0.9400000289103377	0.9048325059314124	0.9384357724802539	0.9398998213615714	0.9268696013250658	0.8828526359723672	0.8381696428571429	0.8979475478532244	0.9365461354356756
390	0.9288764657963325	0.9270748759734391	0.9034881582669341	0.8906337649394804	0.9143550470829471	0.9249564367134291	0.9220140937295461	0.9250102829022713	0.8421834276789686	0.9018452933146199	0.9414301943034322
391	0.9215038834065146	0.9100039395280825	0.9227472647504315	0.9321705892908849	0.9369618540005831	0.9236555668948306	0.924186	0.9098822857968755	0.8561708982221213	0.892048	0.9376655736627159
392	0.9238540276297015	0.8957736455051014	0.9238517189866551	0.9306838144443724	0.9281469017091142	0.9383099087004986	0.9103415966407864	0.9199462752361831	0.8630497167561121	0.8653837931383244	0.9464170086053875
393	0.9374127127220044	0.8932896344889888	0.9325673335897684	0.9234331449619205	0.9383749481527249	0.9377700211137139	0.9286764428363116	0.8886372565714149	0.8269779870976943	0.8936479481194898	0.9232256199538307
394	0.9186144232911262	0.9322376038634999	0.9331796307841805	0.8672862089595754	0.925013	0.9374888427257747	0.9165422912123155	0.9209676421678377	0.8472780172952721	0.8903064702558772	0.934784
395	0.9122669610947709	0.9055661129062614	0.9036695602434826	0.9285017738631964	0.9240070449825684	0.9357307073030184	0.9126988659251947	0.8861811249183583	0.8411118746137956	0.8998544340406572	0.925257
396	0.9139642943418492	0.9155066740647171	0.9325112916934996	0.9307790110375137	0.9370176649660575	0.9289331348286765	0.8880270954169517	0.9057393218706165	0.8593697335497656	0.8806102119609807	0.9282255763339021
397	0.9253351897967396	0.9243580302519276	0.9213041767877892	0.9320262701118257	0.9415765077036758	0.936534	0.9122744765003321	0.9161162259473098	0.8512941089571504	0.9045534390528603	0.9311996268887723
398	0.9059849148237004	0.9215722710569529	0.9237562165170062	0.9180142531154067	0.9334908955280752	0.8895073093377548	0.9294290225480502	0.924003	0.8490967289705955	0.899137	0.9307540192117048
399	0.9376901627819336	0.9119502531249988	0.9342435204122671	0.9135535498684983	0.9192595108797299	0.9271475701212709	0.9147647823722914	0.9304968957149711	0.8648610774026619	0.8899601541799705	0.9468224749031328
400	0.9220091995775912	0.9280316061904226	0.9363919204365811	0.8978898572891439	0.919324	0.9100617454197258	0.9217585527966163	0.9134305248396278	0.8525877242833819	0.8873351408120578	0.9431499003467848
401	0.9149404160742397	0.926304	0.9325977447573136	0.9230586246214305	0.9317722045734884	0.9273931471905565	0.9169736047153292	0.9229279870481732	0.8379933614308614	0.8933234464628189	0.9312376822412398
402	0.9338211262715718	0.9164443367887374	0.9220091334286161	0.9142794290863724	0.9277399038978449	0.9490342341260574	0.9235071407025263	0.9136524120123661	0.7228383461709347	0.894186	0.9314314631090672
403	0.9275957623432491	0.9249475807798506	0.8958373311703627	0.9280065322891372	0.9152280696797854	0.9436499956524592	0.9250976601618115	0.9073507225595608	0.8229546674605286	0.8756244957814813	0.9337162637912324
404	0.92952	0.9238633424501708	0.9295864538981548	0.9129822820622842	0.9315809495446015	0.933203	0.9293212823919741	0.9198409422609637	0.8315168987186051	0.8845995437156224	0.9290466608394622
405	0.9348496205080724	0.9127107963041164	0.9309043391268091	0.921673	0.9262668858657037	0.9419589773388857	0.9330364988664701	0.927887	0.8601056632710665	0.8960787009892406	0.9368300318324717
406	0.9432426285040835	0.9250173595517719	0.9265788548393027	0.9305068214220136	0.9205935582531237	0.9197727564449575	0.9308521093727523	0.9073815838685239	0.8693810449898713	0.8777879832736527	0.9293408362207534
407	0.9264022784402217	0.9180972061151688	0.9218823900949376	0.9211312307727435	0.9259585891674402	0.9280562521187316	0.9254611511920368	0.9354642887976885	0.8151924276488904	0.8623127912236791	0.9183246000970469
408	0.9327245932375261	0.896884	0.9402914007774916	0.9194986294103026	0.9468612836011652	0.9121352603476588	0.9312152375371987	0.9011259414475289	0.8239268046450287	0.8784858091351317	0.9277229867865829
409	0.9222812304868737	0.9389503505107073	0.9256679743011963	0.9178014641049939	0.9341436393919957	0.9349058339759236	0.9100838930340113	0.9119086450605632	0.8488477479915872	0.8565822357806189	0.9244138685291495
410	0.9182822696554881	0.9271179740040781	0.9271549644802154	0.8980276480308482	0.9133036529194616	0.9296810254390551	0.9251658363421642	0.9199443701832797	0.8464099303348732	0.8609068793813921	0.9398281214031339
411	0.9402615096582746	0.9245613001892026	0.943377	0.9225310152163625	0.945777	0.9261135114673548	0.9252152252517938	0.912417	0.8356168645753627	0.8971101694861553	0.9444496200761618
412	0.9086176770922096	0.9208074480018625	0.9248232848263146	0.9293014386380378	0.9303355667158799	0.9282943230448235	0.9241022118042727	0.9368504895180524	0.8586215038506494	0.9005290535698913	0.9462572382100657
413	0.9384003893870166	0.9251992941615197	0.9344972541251153	0.9106728736816657	0.9358516201400078	0.93232	0.9126708048266584	0.9188149540453542	0.842626	0.8336141311866357	0.934024
414	0.9235896183826221	0.9234528864856381	0.9198047637887432	0.9273572812459914	0.9257472344664404	0.9094639846450412	0.9209060062977467	0.9287354201305493	0.8646776248373798	0.8842396613553197	0.8907877718578889
415	0.9345527296223038	0.911496	0.937996	0.924801	0.9238653600673861	0.9171664388428178	0.8896721622773881	0.928057	0.8553888404464138	0.8941563849963008	0.923218
416	0.9126705155208947	0.9217869511515354	0.9287020776355147	0.9303868325245049	0.9252472979245607	0.9383551174455104	0.9266888163852463	0.9279470170090279	0.814637	0.82255	0.9309307670980506
417	0.9290279218782977	0.9166576656250907	0.9169562307235846	0.9085810038790193	0.928032	0.9388591063882818	0.9043655273132178	0.9206329681241192	0.8266961360722016	0.8507467432752902	0.9303305888988296
418	0.9325795854025876	0.9076964878118929	0.9248166519744356	0.8988227909807399	0.9293421012410328	0.9363031165966933	0.9283009089966715	0.9320849029501188	0.8458299160885097	0.8929571621558431	0.9283741310009097
419	0.91737	0.9234384130323471	0.9354852764081966	0.9165282049168758	0.9116797249050459	0.9154742593483388	0.9314850909646396	0.9234804127819085	0.8216527085104208	0.8888957673649576	0.9350428484121507
420	0.931315	0.9356443009617166	0.9236418900194259	0.9154913263262802	0.9372571945542159	0.9353841181953931	0.9155696865510948	0.9350567234744702	0.8432444179101259	0.8730776400461608	0.9334635204932837
421	0.9258741436028817	0.9253714830442605	0.9313936657432904	0.930186	0.9362486798642815	0.9380751993321327	0.9286157881245599	0.9232286735859957	0.8481016962712193	0.8843924729631882	0.9361063011506476
422	0.9325215929339227	0.9321523423178171	0.9378897181766626	0.8917930843743416	0.9269566775303482	0.9323774818948062	0.9123614349328241	0.9211062317970472	0.808858	0.90213	0.9405966315690302
423	0.9408772394364864	0.9325839707543341	0.9313804019770379	0.9094242676091157	0.9410435578370879	0.9278015988817339	0.9274639465128791	0.9131181128209872	0.8434090995622299	0.8667510611681063	0.931058
424	0.9415021976882693	0.9322542236198643	0.9346176472806862	0.9359212704706291	0.9195812004177852	0.9438732808232341	0.9343531275655402	0.924374	0.8172818091312035	0.82579	0.9290782580741229
425	0.9169814045532975	0.9299224657233515	0.925325	0.9167143670577805	0.9199417052839134	0.9130163113684341	0.9098698494290953	0.9368961387129753	0.8266410672658768	0.8969160132950705	0.9301809494296343
426	0.9240133077742417	0.9128348314906751	0.9131927172374461	0.914844	0.9376370126046764	0.918046	0.927858	0.9310411682840083	0.8551588135547523	0.8769799663197296	0.936832
427	0.9260949309009335	0.9215470604304261	0.9373844081852076	0.9094580621163526	0.918408	0.905363	0.9246007171830277	0.9274228437217505	0.8533883388352865	0.8815971155747618	0.9259896444069637
428	0.9389927005244223	0.9194843946335683	0.923277	0.9035532514015586	0.9312585404734085	0.9157952166255318	0.9149921043378674	0.9282415654561388	0.8428818588926679	0.8907339288135946	0.9213829572264798
429	0.920169	0.9118760710509229	0.9433797647644241	0.927191	0.9223952361100951	0.9427696430230436	0.9206763686662655	0.9389912484086519	0.8255551683806888	0.8963849762345096	0.9359117783705839
430	0.9122185094674136	0.9278032404974742	0.925861	0.9204189250055695	0.9341035248408355	0.9296049918309125	0.9319162829866573	0.9334338087132475	0.8572329950100053	0.869728	0.9192166230607495
431	0.9275079887074508	0.9406216189222836	0.9326079895010564	0.9196392485392247	0.9123397036800499	0.9395156340080162	0.9351815466822756	0.918866	0.8366047826663846	0.8715484848362233	0.9211610224697322
432	0.9191075986817918	0.9264306437034738	0.9291398176375205	0.9206124726302598	0.9312258848694558	0.9363491806788461	0.930236	0.9215320220678862	0.8480180860064966	0.8545874221844892	0.8901239400498446
433	0.9260047923382049	0.9236935950196556	0.9175697538380225	0.9185749181618719	0.9210124588189187	0.9134571999590936	0.934603	0.9278393098351614	0.8437659894799778	0.8963726769684536	0.9335296538243567
434	0.924169	0.9320736760346231	0.9066580109189586	0.9058412925503441	0.9425090336178493	0.9447402462116066	0.9244098420756606	0.9071821272152535	0.8363014960766246	0.8821778707135821	0.9376036711010087
435	0.9290092908168651	0.9343971831306954	0.9212175963949745	0.9153995259467255	0.9384234807020178	0.9312416006019629	0.9062141551517122	0.9215109405993479	0.8279453922158355	0.8838158360184715	0.9415544370703011
436	0.9241684505705804	0.9294606202489822	0.9335282425611018	0.9270207473354456	0.9420100816963204	0.9212531274180171	0.9210469329073032	0.9180710681297322	0.8420726799719322	0.8932609830644521	0.92929
437	0.9192435519347122	0.9280509045459859	0.9333078833569554	0.9127668190323955	0.9327860216607311	0.9305003062043109	0.9232014060951174	0.9111944043781377	0.8585332974066094	0.8854472333406146	0.9354876403396528
438	0.9317242025772561	0.9374299873410483	0.9341546283253456	0.9089603375141042	0.9415406997291113	0.921264	0.9149813969144529	0.9246187321489231	0.8236693832353821	0.8873221435388959	0.9391460770362747
439	0.9342098939879415	0.9213624389885566	0.9340961824018662	0.9260524747896053	0.9262701001899332	0.9196930787771344	0.9160600988933373	0.9097743582001325	0.8262008944220928	0.8979652781596221	0.9416723639460436
440	0.9348018220712133	0.937021	0.9351555470205047	0.9177948664148652	0.9427958881430761	0.9278893237820764	0.9051053231710706	0.9386794279528188	0.8452727932886197	0.8823017643595255	0.9390456825226107
441	0.9253572802224133	0.898116	0.9502511036502992	0.9257240803955614	0.9356722645449977	0.9241214903849332	0.9161879325974568	0.9087380024182984	0.832547	0.8704022327488703	0.9275882987981992
442	0.9208705339138168	0.9244094530806356	0.9412411098210788	0.910171	0.9420714907549677	0.9350013470743574	0.9146394483947496	0.923276	0.8593672383990709	0.8884716832491417	0.9271281997877439
443	0.9088539830800696	0.886459	0.9286801898839818	0.9129518316025514	0.932283	0.9284733383760234	0.9203255895917654	0.9173573994084322	0.8348857091587015	0.841735	0.9284053271099398
444	0.9120234668948906	0.9411963682897977	0.9153461239596701	0.9059022758002776	0.9377859274016069	0.9175862582449722	0.9177394987873014	0.9234025185626679	0.8709446055132535	0.8884828764402409	0.9272208396876682
445	0.9262222497566357	0.9048375636743022	0.9364942058969187	0.9252878375844766	0.9296236417869699	0.9301233533718793	0.9248234311572804	0.9147068825059431	0.7495350223134085	0.8650439145866576	0.9174024470634592
446	0.9396910627027047	0.9247613788182497	0.933919	0.9179908106113391	0.9199160186040921	0.9270332946937813	0.920768	0.9283563694935534	0.8491481963277184	0.868352	0.9249293526663567
447	0.9361036880164436	0.9162334854405987	0.9249638005800991	0.9311061660168111	0.9261963496813815	0.9318646032504756	0.9352479676296784	0.9362575322184398	0.7922471302845397	0.8477643243357282	0.9259014491086426
448	0.913356	0.9319602614044945	0.9248667846512026	0.9293179461867023	0.938297	0.915036	0.915895	0.9187663040215709	0.807055	0.8758328760388173	0.9399951223030713
449	0.939879	0.9394348625845625	0.9278020788671593	0.9074755624317086	0.9356875086633694	0.9152010614617496	0.9308824924414666	0.9157820190990706	0.8445285441481317	0.89101	0.9284596315268067
450	0.9269307577903986	0.9179690508885986	0.9125657289430997	0.9273777258654938	0.9419931450974055	0.9198854346716697	0.9156756645886186	0.9454721039765578	0.8561215286442563	0.8762653145997984	0.9260899981662015
451	0.9305775964788836	0.9150156703539104	0.9045669775099152	0.9236661834967176	0.9385633059606758	0.9376306158374362	0.9334679730360993	0.9162806211917492	0.8185555659670165	0.8845708069773145	0.9435210431798541
452	0.9272924917533097	0.9192088354932278	0.907455	0.9338352831953706	0.90625	0.943272	0.9100502879247152	0.9275827938410992	0.8449324655563595	0.8880501573057082	0.9168742669359145
453	0.9264958751624832	0.9306400381380292	0.9061710598854973	0.9326053214814244	0.9358996992669469	0.9455944236230104	0.9142286223029761	0.9119728980502678	0.8557951907219521	0.8854847984017692	0.9309485667361662
454	0.9178315210520669	0.9380947820409288	0.9280214151085885	0.9176035960682597	0.9197448143954928	0.9294413332731347	0.9130149383875923	0.9308787371438711	0.8444640347749118	0.8918639893247641	0.9379472274975249
455	0.9248823031387424	0.9279389443531342	0.9114372608410606	0.9132609989402247	0.9247291033802353	0.9381021622210913	0.9310424233836028	0.9215383493038912	0.8647303217052973	0.8840599309917362	0.9360796268841189
456	0.9357939566762763	0.9236648576266467	0.9032811397353884	0.9220381281612998	0.9280604478223934	0.9235251846727845	0.9155834363583297	0.9234056202344373	0.8487616851747286	0.8850990640868798	0.9281532435551373
457	0.9303939166001916	0.9126935439466484	0.9238400770951439	0.9351509860825833	0.935253	0.9293367676207076	0.9325722263203194	0.9377143840923923	0.8188864565451816	0.8893127494154486	0.9234623593286845
458	0.9283956230832117	0.9256943015171439	0.9201517142039911	0.9151994584950635	0.923776	0.9105729843508494	0.9261720488664953	0.931111	0.8544606414086315	0.9037084631096174	0.9352354977260203
459	0.9262994627459823	0.9380885814531404	0.9209654014181511	0.9266021346946182	0.9287777383824568	0.9347944594979885	0.936496	0.9263686055671093	0.8545441894417718	0.8742829356128977	0.9295691090062922
460	0.9285107342262491	0.9121107089305126	0.9266479802984334	0.9292802509592737	0.9385116023654625	0.9270671603205668	0.9281533999080133	0.8987902552518028	0.8587675648577484	0.8964949362598843	0.927044
461	0.9125414592839232	0.924294	0.9343635049423406	0.8890714695674063	0.9365949034980353	0.9341116644118291	0.9212408222731444	0.9272080631385308	0.8532308724858139	0.892478	0.940882
462	0.9294762136071718	0.9280028690636577	0.918017	0.8913655819941838	0.9387492265643211	0.9423249032153835	0.9200391209369138	0.931194	0.8561881423927512	0.8938862427873281	0.9309128673170578
463	0.9293650951889985	0.9303828464437113	0.9110339798009676	0.9139706420949928	0.9365980393915811	0.9134937133818574	0.9011297096815969	0.9083262886958692	0.8627982191790817	0.8670897472351635	0.9405996179911255
464	0.941657	0.9357752167292025	0.9161358867491385	0.9319394873538371	0.9186362479568845	0.9204125442330074	0.9331484984169748	0.9306727619602931	0.8589863028411031	0.8652120957325166	0.9280572791617263
465	0.9344000297464641	0.930629	0.9402640360871118	0.9235601370309735	0.9339838807425149	0.9225517001974479	0.9159418718922936	0.9315865809024024	0.8641430734218477	0.8994228352510428	0.9385102628241835
466	0.9324229873787303	0.9145068865173023	0.9275595826267435	0.9162794874415944	0.9291804604659897	0.9345425177568335	0.9193335119903566	0.9102885967941796	0.8491679525669658	0.8886099732971297	0.9006983719012708
467	0.919781	0.9277227530171136	0.9051514490541517	0.9246978920188603	0.9348935878324409	0.9280504172936219	0.9293963485246254	0.9167938204088891	0.8335952742460548	0.867024	0.9421898295600956
468	0.9126856304795936	0.920973	0.9002357890510709	0.9213797231012979	0.9418712783899813	0.9025337643224037	0.9126338168988914	0.910728	0.8371728582099485	0.8538003824337052	0.9257779514538598
469	0.9187411193060797	0.9239607711465057	0.9308826575167147	0.9103907947809411	0.9342847339515026	0.9247976445560714	0.9226700622303853	0.9220603591149663	0.8163432945588694	0.8700789324084202	0.931064
470	0.9311501562799253	0.9363244635254901	0.929895	0.9152904438955372	0.9334632046013077	0.9175101883168671	0.9324295006872844	0.9120198979207003	0.8253344631439885	0.8851084583785201	0.9193003914429954
471	0.9306671632215627	0.9094951762437119	0.9368995610682359	0.9203170334851637	0.9414852659520832	0.9307492638922078	0.9301962270180739	0.9303264298286478	0.8301731556644097	0.8808383819964956	0.9397257146271799
472	0.9355386008126365	0.8916847913144681	0.9247740934627439	0.9290957392746669	0.9322462061960204	0.9131350691860544	0.9192086284908135	0.9206428822133824	0.8193082197953735	0.8709310362087574	0.9332883803844515
473	0.9286349142966007	0.90104	0.9388488009335442	0.9146726962706375	0.922397	0.9170594193666348	0.9115711210508107	0.932069	0.8524493635130452	0.875337	0.9378913164646115
474	0.9238693997182111	0.9343303648904061	0.9049139896643165	0.9178686909976367	0.937779	0.924001	0.9198362785386694	0.9373303751241836	0.8443773590520657	0.9018098606566168	0.9225572250273141
475	0.9402010436034708	0.9216344548501098	0.9201234789918792	0.9297642622355191	0.9252083227122812	0.9180651462239662	0.9204626232914681	0.9373097882768612	0.8369444753868533	0.8792812525050145	0.9314877473790699
476	0.9274262458086947	0.9356555629628094	0.9209500697202715	0.9299381970261045	0.928543	0.9158587695554697	0.9115783154900008	0.932561	0.8476985009072047	0.8631606384495201	0.9144259222328717
477	0.9392804047201023	0.9351124785744536	0.9215646838269878	0.9273682919600138	0.9438516798407874	0.9287440073035802	0.9254529123506202	0.9124411549785423	0.862355	0.8871387977173623	0.9394688023007695
478	0.9134738293464013	0.931213	0.9334782762852556	0.9154651325092804	0.930144	0.9334569626030651	0.9334955839996687	0.9268014406327312	0.8502241878514578	0.904678	0.9418605315654227
479	0.9218963035453077	0.9167640347634638	0.9160515714102465	0.9085240943110242	0.9259324626623654	0.9207335168646978	0.9128036613707046	0.928879	0.8605146350058295	0.899346	0.9394022697629512
480	0.923627	0.9338226627790012	0.9076126201240887	0.9143968890097575	0.9260476207438932	0.9325726801799019	0.9144893912282567	0.9176278383597072	0.8439725394735248	0.8683197733598504	0.9444683580395812
481	0.9276794635142719	0.9325828303377816	0.9382288451104981	0.9008489742853858	0.9395536058946528	0.9314218179064973	0.9275652931084231	0.9313209910795114	0.8341194269667473	0.8339158347115226	0.919276
482	0.9358619892709735	0.9224058971912267	0.9249481771683188	0.9180967022065107	0.924618	0.9422530435362678	0.9256350169158994	0.9291965749703602	0.8543898539257222	0.8864859823316374	0.9256512479593375
483	0.9293543808199943	0.8991938175758313	0.9319517347263679	0.9273947958772678	0.9267966432725994	0.9339244341837754	0.9316653521228043	0.931575	0.8532463716445718	0.860597	0.9354670573565441
484	0.9333332075043096	0.9334793410992461	0.9091149995402221	0.9210701686727755	0.9267542450232394	0.939115	0.9168852592191074	0.9155746721630698	0.8450893825535529	0.8711068628141714	0.9244725620889195
485	0.9352936921567111	0.9211384713331552	0.9056767615321379	0.9187057118374937	0.9301750144187562	0.9413796607171719	0.9265129291393087	0.9382002987381837	0.850708	0.9021978405536274	0.936408
486	0.9302225400445767	0.9203024369642484	0.9256944305079124	0.9201790887743969	0.9296624411765595	0.929058	0.9215644554011256	0.9154380112337874	0.7780262077253839	0.8734875239917536	0.9273920003259968
487	0.921844	0.9243422222575924	0.9199354319778039	0.9109563939767756	0.9376203786091362	0.9312233239204061	0.9334254598553892	0.9147283219678181	0.8676743730407523	0.8896180459571119	0.9347701216301917
488	0.9220307180110842	0.9210525731878616	0.9270185874574035	0.910057	0.9236605436604521	0.9252599148795613	0.9151768716467813	0.9335881270331272	0.8617186945982673	0.8815253315767054	0.9357768375526282
489	0.9273963739737816	0.9112691779446455	0.9317085406796389	0.9048089833167648	0.9275622043117249	0.9168870969564743	0.9287304403153815	0.9275512098113637	0.8508744505612694	0.8806826616356481	0.9445432015823793
490	0.9198776639457031	0.9401242297458648	0.9246360566015761	0.9358188609440308	0.9375103667145088	0.9241207501175752	0.9200355005566812	0.9324199547608232	0.8459748641314703	0.8416591877944049	0.9331105062141893
491	0.8948471776629949	0.9128835404344896	0.9339055589737915	0.925454	0.9399592673080593	0.9107361498746125	0.931032	0.9239043535325919	0.8022522908741689	0.8778407317544387	0.9322317869592182
492	0.9241767799339092	0.9316585682033204	0.9397237743789678	0.9163335782879372	0.9217730012629473	0.9355270933170425	0.9101154104571051	0.909498	0.8275284310899744	0.8596213542217449	0.935001
493	0.916746	0.9029445305286707	0.9277990699301761	0.931026	0.9417055258131947	0.9086802894256223	0.9147507619673207	0.9217534777665927	0.8697376867413633	0.8642690642622294	0.9318806341294961
494	0.9263008040167456	0.9266758004759519	0.9234622572195633	0.9092597199017775	0.9262370478137771	0.9088248646282815	0.9204780751192532	0.9270418871543576	0.8444741708546095	0.8737877621286465	0.9220416644122222
495	0.9280900153468703	0.9332251787054281	0.9368548402195657	0.9201719869756736	0.9389772812017503	0.9337734614618449	0.9345954796773914	0.9323294167417767	0.8569120176756793	0.8784534945072452	0.9237941660635107
496	0.9223409599207474	0.9179206968269245	0.9310265360218373	0.9176397231073089	0.9405998704491434	0.9447208577842211	0.9195086664351922	0.9226742796276639	0.8071461963056134	0.8917009127941009	0.9407358309997293
497	0.9379526340646853	0.9363390245498941	0.92948	0.9141220143245575	0.9179597361394563	0.9376022403084129	0.9226648008999022	0.8973357963462442	0.8343217773137834	0.8996263828678237	0.9337656549856033
498	0.9318739085522363	0.9030426494435215	0.9352330580116119	0.9281605432516382	0.9315838897276679	0.9395321247766418	0.9370691104351375	0.9117162104690507	0.8430008399096773	0.9020077532963314	0.9355683586848538
499	0.9344931494978009	0.9372887149346328	0.9160318336701081	0.9284361686199656	0.9468781193411753	0.9278303327479259	0.9340650874605624	0.9258815871671995	0.8610161614606657	0.8971691051475982	0.9132814108210423
500	0.9262354620580339	0.9196351960955186	0.9339992077902518	0.8936223826783586	0.9408338003457326	0.914155	0.8990157048058021	0.929361	0.8643164736092368	0.8968068769373069	0.9462913915993987
501	0.9246782979692296	0.9225460269429434	0.9231267335238843	0.9443096394609506	0.9407798493147133	0.9197819208362695	0.9280894266217018	0.9111672027009982	0.8556744007723112	0.8243450871603043	0.9270147924431584
502	0.9344185216354212	0.9140668505171227	0.9287499950286343	0.9068322936966638	0.9252282091489455	0.9081904020724632	0.9174227488139298	0.9259827429485737	0.8582254464285715	0.8916581297304021	0.9430111471085066
503	0.9295698796443456	0.9285190400123468	0.9327132306343492	0.9178461691914886	0.9302819427930795	0.9431109860254223	0.913117	0.9199891715964722	0.8147948238258035	0.8849275986062316	0.9179040018919838
504	0.9259497270885558	0.9301718106553695	0.9150127728297585	0.9176899682655727	0.9288876203923864	0.9234805855447132	0.9289546443197128	0.9264130393139993	0.8552747012848928	0.890108	0.9405787467441125
505	0.9283796824262481	0.9189447815809757	0.931292	0.9248692265427877	0.9393416079878849	0.9292092370902397	0.9299119019699095	0.9211826560627621	0.8400121357582071	0.9050197917325941	0.9242620791281814
506	0.9172347551924628	0.9114201312703026	0.9161335513735158	0.9149453353150889	0.9188059490157134	0.9124243220339138	0.8980272801703488	0.9249615520994096	0.8547328860038885	0.9023163620691986	0.9457657315493323
507	0.9266758200136935	0.9452709154164284	0.9192696535564439	0.9159866539780352	0.9477724564058592	0.9244934795346932	0.9280669172744423	0.912319	0.8466726812010874	0.891996	0.9219720884186899
508	0.9248029343923577	0.9345978384081118	0.9254446170457051	0.9090185795247041	0.9338279612211187	0.9174546422283771	0.907344	0.927021	0.8438600029403873	0.8887938279231045	0.9205070997364283
509	0.9378502909385593	0.9291480724577377	0.9313725026986112	0.9235039131542692	0.9359386155791591	0.927711	0.9369700515015458	0.9138734576846721	0.8455914697555995	0.8995773910841754	0.934816
510	0.9433922474876263	0.926562	0.927436	0.9179432387018497	0.9334737102546018	0.9274252752821608	0.9203483430504796	0.9020330071747306	0.8085876004329704	0.8951666769495531	0.9350465282480047
511	0.9234923411302391	0.8937265528816601	0.9258492588052394	0.917566	0.9346870038918252	0.9294089778819024	0.9009196512871034	0.9121533042525417	0.8372905693263317	0.8845360861930729	0.9320746776865417
512	0.934068	0.9274165939488657	0.9360055168209342	0.9092328797107689	0.9225795274824666	0.9189946465821744	0.916132	0.9313476547785364	0.8570907232445812	0.8533521498951818	0.8980662959130402
513	0.9124205267772079	0.9141789539678677	0.9274848178223463	0.9171680328419316	0.9213501112657694	0.9139594620805918	0.9217489130068093	0.9282118336224162	0.8393127068710629	0.8909883415958366	0.9264781730131388
514	0.9289694713269606	0.8991998778198333	0.90923	0.904023	0.9322132057507138	0.928828	0.9291778558281607	0.9318970417817002	0.811388	0.8853122145835256	0.932504
515	0.9402978863571557	0.9279343427075303	0.9369376286369563	0.9003380809927299	0.9213969545260248	0.9375589788841023	0.9213329194619438	0.9148851264117225	0.8470429040610431	0.8752126230403877	0.9220889481936917
516	0.9165380058691305	0.9300463448846928	0.9274056737679127	0.932264	0.947891	0.9370087508251955	0.9244731582753374	0.918756	0.8476107584391026	0.8863339557220461	0.9328249712672815
517	0.9296337903891869	0.9378073335591608	0.906647	0.9150775006096612	0.9372254623657923	0.8929093943198071	0.9045873883355332	0.9371822558438485	0.827063	0.8823332242689196	0.880489
518	0.9413485862618991	0.9259903426937041	0.9357674254737887	0.9189086493780827	0.886083	0.9316848662076732	0.881924	0.9127732871548873	0.8550207084021477	0.8252874538995463	0.9347940701472874
519	0.9220722937020118	0.9235422220964533	0.91513	0.9122850507778082	0.9399271268996614	0.9247625014935403	0.9296593289201576	0.9186724768217749	0.8461046982621848	0.8346160289192189	0.9374027188857083
520	0.9280718025146099	0.8963363368793638	0.9390233042129565	0.9159170453692105	0.9239567025831271	0.9482427169250132	0.9000247288697463	0.9333456600334965	0.7922175886303419	0.8867638026144055	0.9264568578201523
521	0.9334680275175306	0.9233750431145025	0.9311250179828134	0.9272044010262974	0.9209929973116706	0.9416938153587491	0.907112	0.9303356801204936	0.8575503530789812	0.8647764913364134	0.9284367750057305
522	0.928533	0.9161062703968098	0.9268056668375321	0.9263139868445034	0.9304928709351563	0.9433785407705881	0.9258435067394565	0.9363936069302997	0.8310879576014829	0.8635311434816794	0.9210247235751191
523	0.9449389551128651	0.9111367629425632	0.9304736791949625	0.9235377065172518	0.8983622265174585	0.9411698009119456	0.9271665124660303	0.9282217628650141	0.8345190648764129	0.8815264373332198	0.9361230566012715
524	0.9268756316685737	0.9309957600117104	0.9318564875682289	0.9237340207860135	0.9340516904923978	0.9187169843539307	0.9197804660866936	0.9245064702738788	0.8323896151916076	0.8949125024735939	0.9351110165631862
525	0.9186203094921043	0.9033483591131304	0.8911343001175304	0.9096524912262841	0.8920188776275286	0.9384428026244802	0.929937	0.8930531419837415	0.8522123141257888	0.8697033673135324	0.9366891049824746
526	0.8809689253122641	0.9240756131126113	0.9191678541937526	0.9059474834831929	0.9301922533700803	0.9245373852048002	0.917379	0.9180087564884211	0.8261887336990017	0.835781	0.9400534142246642
527	0.9325668088082878	0.9236864050441818	0.9322525604779861	0.9130874038085669	0.9271815121925503	0.932696	0.9257155853718521	0.8978731734246554	0.8541238218599869	0.8851738103983107	0.9268984230063246
528	0.9212758901373757	0.9128419058601634	0.8908448577113305	0.9138203847223743	0.9292344096477588	0.9294854489953361	0.915272	0.9288418573889647	0.8534674670357407	0.8884659279579821	0.9410002840282665
529	0.9227953671378171	0.9419456882982196	0.9396334305433668	0.9113670736965457	0.9216761850333829	0.9379374560739058	0.9353957452996767	0.9094225480949781	0.8656543587677652	0.8959215850862127	0.9382586615159697
530	0.9458284859628118	0.9151550706685688	0.9369048373012115	0.9263765047500917	0.9234771950883739	0.940946	0.9227610485838982	0.9116235785630188	0.8344996293921908	0.8889639709483407	0.9178216174583625
531	0.9229448441304499	0.9234278636280302	0.9246834181257256	0.9181049920756518	0.9441398478121795	0.9303388280548207	0.8942	0.9057378049267437	0.8617286680754173	0.8769428329654239	0.9420851205058762
532	0.9278687797433237	0.9255218849013901	0.9254023383799053	0.9199388951804465	0.9423938057807284	0.9185902663238056	0.9275007338245815	0.9202933939695501	0.8271265920668811	0.890405	0.9363146589918598
533	0.921183	0.9383589094717675	0.92032	0.9227415951398783	0.9009539819470811	0.9338440963911872	0.9253175394491184	0.9248648953603533	0.7834506477941748	0.8811640409082605	0.9397018579797499
534	0.9355848547229424	0.9226520677042197	0.9348987667770026	0.9035757784600921	0.9332402738465075	0.9265317272375873	0.911587	0.925012	0.8440543050439515	0.891541	0.9477733273244248
535	0.9208388534142949	0.9142106448068943	0.9392301995173707	0.9188841179754651	0.932295	0.9448596852859569	0.9309379827219495	0.9330941499478834	0.7896935721526355	0.8934507540197084	0.927528
536	0.9320960979005559	0.922376	0.9106522557687372	0.9030246585367538	0.9413043607462916	0.9405444674396792	0.8891214067504173	0.9254387041081431	0.8644684182568717	0.8856962026891932	0.9274944929455027
537	0.915464	0.9282110113925287	0.9429394987750448	0.9208326625450399	0.905333	0.9315139913131462	0.9283711140645149	0.9108823318360535	0.8650912632620182	0.8780630130632782	0.9110787137885316
538	0.9029045555352357	0.9149130827021226	0.9370685339269158	0.9363282284446808	0.9324581443175847	0.9269690156874202	0.9114326523285301	0.9078270791981349	0.8578577962285392	0.8914862906447275	0.9307106946711096
539	0.920332	0.9318627886787453	0.9396135554439915	0.9325322280801824	0.9373914004262569	0.9167741848362161	0.9041447789576331	0.9254545995088368	0.8546600486645902	0.8926609551456037	0.9318169569575189
540	0.9420421216268291	0.9293362548352054	0.9199929355932613	0.9025833023962812	0.8947861528529738	0.9003078403038537	0.9011818589420811	0.9290422725509395	0.8511834516592913	0.865888	0.9457661473537285
541	0.9314944961922549	0.9207128738878757	0.9317997241948176	0.9221752318179189	0.9421242282470097	0.9379250307018875	0.905194	0.930343	0.8414679881327791	0.8753186412865207	0.9389867481304991
542	0.9331053555264811	0.9323276683285039	0.9307143915410463	0.9041632781072381	0.9378232359921321	0.9269234971452384	0.9152257541764542	0.9323453548976827	0.8558540141420576	0.8857242538267349	0.9307251931300182
543	0.9186384024743399	0.9360199904827079	0.9209838957374434	0.9207940649215911	0.924223	0.9391633627198114	0.9179545082893259	0.9316553169546821	0.8613633915104504	0.8651918169808025	0.9335609060359403
544	0.9296931774595295	0.9369706575187995	0.9416148858937011	0.9174657659755383	0.9247322675392239	0.9297150555705037	0.9324629447074086	0.9024913487488042	0.85114	0.8708570897182438	0.9191564739332556
545	0.93215	0.9358196326394818	0.9305824063066959	0.927792	0.9493195229379026	0.9247555679075273	0.9211947937613421	0.9429624660957521	0.8508690835624131	0.8897540007067103	0.9447934704083946
546	0.9179047121690399	0.9339954533751005	0.9121681822602065	0.9242152424008083	0.9381675146372286	0.9360911107619369	0.919437	0.9365481240015938	0.8297518248559532	0.9078664448200268	0.9200294838084129
547	0.9201691028778166	0.922796	0.9084012497502626	0.9336710458853001	0.9321951552416762	0.9385260029669574	0.90297	0.8872739294302089	0.7831580224161718	0.8804424432850521	0.9357278330550154
548	0.9224285521098976	0.9331181539836879	0.9255640081516195	0.9152100839332302	0.9199834337963889	0.9350295040735119	0.9027511727552096	0.912749	0.8530875337771257	0.8879914892609503	0.9423376851249279
549	0.905814	0.9273612913744205	0.9377329688043552	0.9233520936581052	0.909064	0.930259	0.9246302887567165	0.9305209274180047	0.8447530158494057	0.8699308008465328	0.9356911775709357
550	0.9161319288172096	0.9320291805164409	0.9291086990438719	0.9263619252878353	0.9331322435704794	0.9415080564521825	0.9224544434556657	0.9427563917509008	0.8515380118612288	0.8969546387824141	0.9316382454306392
551	0.9353016389417298	0.9233219705272039	0.9089355879665753	0.9036552028510162	0.9128223804192149	0.9259473030438174	0.9197229997142263	0.9310149665030708	0.8521519510653099	0.8755690595127397	0.9255458758279757
552	0.9376145452857312	0.927782	0.8724497088013193	0.9348453283607728	0.9327409885844382	0.9164286238808795	0.9063867800644713	0.9205953251693567	0.8424160171452554	0.8856711833873604	0.9146672527191824
553	0.91749	0.9169235743404415	0.926517	0.90691	0.9387310938160338	0.9294005954978259	0.9202876757730258	0.9372022484020448	0.8582409427264701	0.8603236290581622	0.9102370130201313
554	0.9354512934893316	0.9391594887543897	0.9324410153483952	0.9280519670174253	0.922918	0.9203368696999719	0.9209295854848799	0.9058428083560915	0.8359522080917818	0.8988621116524151	0.9368658423715063
555	0.932985	0.9031990742029501	0.9125047644727082	0.9318412991101636	0.9292533285745311	0.9258837965362021	0.9211729954888493	0.9213403435908651	0.8505627537270203	0.8523010611775467	0.9261880360898439
556	0.9240747140988402	0.935561	0.9184687166311762	0.9181187036142024	0.9364215850646339	0.9370339571824735	0.9114745656833816	0.9328847610935828	0.8395379386259834	0.8505146714092273	0.934873
557	0.9267938990174418	0.9207074025296863	0.9337971042545169	0.907757	0.9282504932999041	0.9148830969282089	0.9100269386818703	0.9149185005189806	0.8471830459677707	0.8554739086986439	0.9367994836734453
558	0.9344042140803691	0.9222455918980408	0.9050933456537135	0.9206201607648169	0.9359368258831666	0.9273556670004671	0.9290413456713024	0.922281	0.8406058579199462	0.8840541497848283	0.9451669518727227
559	0.9378679848136579	0.9239164160077168	0.9314415688594876	0.9121053794444723	0.940315	0.9282611565394817	0.9166536531506079	0.8936721818307389	0.8432146920218302	0.8946475176370007	0.9371755200931622
560	0.9083770030724718	0.9121050719430271	0.919962	0.8673490455990048	0.9203601445992855	0.9158785209677176	0.9321868002387824	0.9244557259288163	0.8518250723261716	0.8731142300278457	0.92216
561	0.9127543569745084	0.9085770524852369	0.925944	0.9096659180409752	0.93192	0.915493	0.934861	0.9360955319834158	0.8558215076559844	0.884446	0.9305152249308332
562	0.9363541217756081	0.9188499178773188	0.9120966309769649	0.9342474231209335	0.9283087208722351	0.9401164959179292	0.9252194401135041	0.9212695188157711	0.839136	0.872575	0.9033036034137385
563	0.9257151735712158	0.9238129320611063	0.9062493917664242	0.9233050569342974	0.9320848798956849	0.9150988430383894	0.9218468008359352	0.9296031174778533	0.8386762170454933	0.872286	0.9304605944135329
564	0.9428722742452055	0.9360993772215781	0.9014120588255566	0.9106874019549703	0.9310627022074403	0.9134947978652035	0.9226019993796806	0.9318556693753522	0.8514403067139036	0.8765721441845455	0.9400959351583302
565	0.934982	0.9333058078436173	0.9203638836076701	0.9268397585749867	0.9289789417413215	0.8736973524761429	0.9148927292432717	0.9316791784760118	0.836621	0.8787396458413617	0.9221099198391058
566	0.9371692183026011	0.9291501659745999	0.9314609580950209	0.9030123942707108	0.937481	0.9216046726251472	0.9263572902721293	0.9218912484390828	0.8039064980787003	0.868208	0.9057249960986484
567	0.9350274465941399	0.9175933208208443	0.9343292169714319	0.8900128848713689	0.9377431553615465	0.9374767226838722	0.9096715559188802	0.9359807228381805	0.8246011964438924	0.901449	0.941872
568	0.93687	0.9185788824638081	0.9372735315764301	0.8940907887780027	0.9292183336959174	0.9395880442408154	0.9197861671075431	0.9193955994097052	0.8178678832801197	0.8769224965194594	0.9274371654587232
569	0.9226123510878248	0.931388	0.9053584505209402	0.9163193308419586	0.9168910781671833	0.9125872270091027	0.9315218401502506	0.9377717595952951	0.8499206300699081	0.8806008569943473	0.9310340944568145
570	0.9106369853119887	0.927151	0.9329676371774056	0.924209	0.9344533805391619	0.9460294730505079	0.9281064041445011	0.9116505806812549	0.8611565114472091	0.8512958285070192	0.9333463471954171
571	0.9261719534190652	0.9167474877176065	0.9332479344933807	0.8945038412714279	0.928827	0.9289642970150352	0.9183770108906534	0.9200665893189057	0.853191	0.8894024392794223	0.9276140740079205
572	0.9248116793710647	0.9101532382760784	0.9282056460771687	0.9232302493368812	0.9289799165866186	0.9244156421357097	0.9185141683079057	0.9327667934595781	0.8548821651001435	0.8907727734112338	0.9241641059777946
573	0.9370487753036928	0.923248	0.9292807691537339	0.921785	0.9403278674888285	0.9118513847662013	0.9141856243064026	0.9155161158861607	0.848811	0.8739817964970139	0.9307692560631678
574	0.9156427344070603	0.9281657962302362	0.9270951416327049	0.9239734036602609	0.9405425776080111	0.9187985066169829	0.9203641690353672	0.9220099939655028	0.8544640146525401	0.9020963209465722	0.9350852651540782
575	0.9257144045212422	0.9223840147207656	0.9280637317907979	0.9196911543035845	0.9147873435619887	0.9348111143434275	0.9229832773952552	0.9290346242316376	0.8433487461281234	0.8951773860307193	0.9227284234138721
576	0.9284753214257906	0.9235024627342383	0.9264329685587441	0.920011	0.9252423018645535	0.9361989192200014	0.9400030033661584	0.9402001038643406	0.8450883127669809	0.8857746802562608	0.8949240912054409
577	0.9354407042771531	0.9244095964246573	0.9296261124702306	0.935472	0.9421948323048097	0.9326517700380291	0.9253125566471718	0.920158	0.8572037031028135	0.8968203924627348	0.9379521553773523
578	0.937055	0.936656	0.9230380766107805	0.9348406086381842	0.9355931573610364	0.9412580638242388	0.9027104946392643	0.9280520791373761	0.843095	0.8798885317573438	0.9254523073351568
579	0.902957	0.8887110279382688	0.9396178551283846	0.9006129723690787	0.9428083404083101	0.9236947305923436	0.9110968193144179	0.8989043048543455	0.8478981679707562	0.8968657325935161	0.9282051384979403
580	0.9342902145770979	0.9170283459317132	0.925983	0.9117497345799471	0.9348683251692398	0.9312171280590756	0.9239961681596812	0.9407989783430424	0.8425821383296612	0.8735433523724092	0.9281123226182003
581	0.9200407409283614	0.9296380827973991	0.9138526441769443	0.9299623463204754	0.9199763334105389	0.9334881993907194	0.920164	0.9311839726726144	0.8178811742122725	0.8776981065979288	0.9392528157285163
582	0.907961	0.9204953088437644	0.9475387513898267	0.8957816859168394	0.934021	0.9344992392051222	0.9226196593568566	0.9096426664538722	0.8059963328575577	0.879088	0.9228205618986988
583	0.932571	0.9299120613772722	0.9330028713511722	0.9333247630524536	0.9335813128674322	0.9219992167419723	0.9064472111080998	0.9302837643880261	0.8409481449417084	0.8825751212675647	0.9275024118395614
584	0.9260888543428213	0.911534	0.9170754748999682	0.8871073506868378	0.935888	0.9192210010575224	0.9055368768606398	0.8969125642070643	0.8359713718997084	0.8778957519368084	0.9400465900723161
585	0.9229952930629114	0.9260440013223299	0.9268791536358589	0.9157245041060392	0.9348356846182497	0.9214753600494416	0.9218793999685595	0.9356836755649447	0.8572236164855256	0.8979253029165796	0.929478
586	0.9320970638831503	0.9293	0.9351397170920699	0.9189455652819785	0.9490598140494908	0.9390936531155747	0.9160721450099585	0.9266730513091745	0.8471674160321838	0.8676684890490005	0.9182272580238313
587	0.9417601534079486	0.9289569688966615	0.9296680801441922	0.9304682418721408	0.907262	0.9363806316127806	0.9005553402867079	0.9323768128618766	0.8471631184674391	0.8864264524708592	0.9324410659134615
588	0.9304153018464009	0.9300692941845411	0.9293461835940451	0.9027404519474588	0.9352094364511137	0.922889	0.8963276820919867	0.929515	0.830334	0.8912962360852502	0.9360146938597512
589	0.9216291466115979	0.9172054723526906	0.9290221083898933	0.9103605740054167	0.9349550647197056	0.9334638773404789	0.9290251665937986	0.924505	0.8428274296104221	0.8926065219908824	0.9059606478339542
590	0.9141678722831361	0.9388933063250324	0.9422847780361787	0.9301378310996976	0.9244787936526379	0.9319465932824031	0.9176994772177128	0.9004148407113157	0.8535909593290956	0.8803336440870365	0.9313575425325014
591	0.9211228378341251	0.9378681241860622	0.9374597244678923	0.9249907192934411	0.9287173198611195	0.9303206806642104	0.9351328071426525	0.9048712536986117	0.8719692887931034	0.8714926362454974	0.9226163713672413
592	0.9352794537689748	0.9323772488869555	0.9064397596794775	0.9256165448723794	0.9234782224704723	0.9164172465279788	0.9133691188108619	0.9157211329598799	0.8489514508243949	0.8882051357797093	0.9358440055926436
593	0.9248330917640282	0.9128802471089915	0.9351612426173921	0.93002	0.917716	0.9339301109453353	0.9015245223516412	0.9055972769752597	0.8527520973442935	0.8723082022907093	0.9294646052279619
594	0.9151946190727106	0.9201972680034272	0.9214922429507135	0.9309730353057888	0.9395103034773916	0.9456063876553089	0.9273361612682921	0.9253312454451533	0.812162	0.8466551624906214	0.9464956102819524
595	0.9390044194514796	0.9381422157394173	0.9150641521793498	0.9133233717157271	0.9339445547180802	0.9316281788541075	0.9105894499113993	0.9290074091116324	0.8323900993068057	0.8919883374793595	0.9468272758569206
596	0.9318399593109185	0.9304425016752164	0.9189873537958733	0.9267662525532089	0.9153930270524839	0.9220104882491312	0.9407880937785013	0.9153464284905017	0.8678163402457757	0.8704847520558691	0.9085309647583117
597	0.9458215922810582	0.9333017755994545	0.9403672043890936	0.9212272429743574	0.9321180688276295	0.9150510870047891	0.9229879232887519	0.9091508829106876	0.8406560308599171	0.88726	0.9409167977155101
598	0.9293287067618908	0.9305347948017223	0.9361514699242242	0.9259869752601719	0.9347083079778582	0.9353171325386004	0.9185128706799766	0.9135338893819316	0.8556626702802123	0.891098	0.933877
599	0.9199919402696296	0.9115266931474898	0.921376	0.9362734049922306	0.9301821515339034	0.9344153798899824	0.9244169127049188	0.9147288082480931	0.8691152597402598	0.8992942312048781	0.9283219867331091
600	0.9189393696337961	0.9151611634980181	0.9283174268358116	0.9372450610089984	0.9384606556297708	0.9230379178356828	0.905718	0.9341892283717198	0.8636599280815511	0.8842116913237313	0.9368968371009562
601	0.92026	0.9309399418908048	0.9284480208986973	0.9209807732302789	0.9407794520206139	0.9183234460779166	0.9157095196343782	0.9282783824935197	0.8570005517555597	0.8930429756419246	0.9270471511456206
602	0.9305069907362817	0.9213722808215663	0.9298299759090666	0.904646	0.920417	0.9406814712865497	0.9331865990950259	0.9281189747278944	0.8523751313651532	0.8570772123079294	0.9406178243267482
603	0.929693	0.9170509785775989	0.9259339960833469	0.9233011173419992	0.9288032730557487	0.9105666391836003	0.9240081671739112	0.9322525431250791	0.8508237689759524	0.8952294751991391	0.9199786234772344
604	0.9356870583412927	0.90535	0.9205532379352457	0.9231117068779805	0.9311034472193469	0.927858	0.9349705758593582	0.9302358819947311	0.8413293981724039	0.8640516386924005	0.9295916231313706
605	0.9051167357002423	0.9310496846418362	0.936811	0.9305882035629651	0.9286447708966612	0.9159690637086024	0.925473	0.9300557577816306	0.8457607497805362	0.8318282126464863	0.929258
606	0.9177087492033673	0.9226854163384115	0.9309048526203701	0.9214706895535802	0.9294231325079032	0.9421508254518904	0.9204310937529361	0.9099681778519756	0.8409334088395841	0.8393214219102877	0.9206500769699626
607	0.9004094222215718	0.9151174563445269	0.934969	0.9088796009435195	0.9170010463840502	0.9210700972551272	0.9209290570656891	0.9338915074798559	0.8464022059315726	0.8708109429286436	0.9277315756153744
608	0.9329494297451043	0.9250951171364884	0.9178854049654694	0.8938235582809774	0.910531	0.9172421422518877	0.9251320278360495	0.9314244559778065	0.8615361490361491	0.8848967966015912	0.94167
609	0.9124163590658994	0.9159722367626528	0.9245343641290288	0.92869	0.940074	0.9165582185883471	0.9282949114732466	0.9253004948741094	0.8434630338485574	0.890909	0.9173525331358315
610	0.9123657063733577	0.9191583180050749	0.9206412903634993	0.9038726830361313	0.928076	0.9170863677905177	0.9256221397107354	0.9061014268715039	0.8436393439386471	0.874286	0.9255424283205066
611	0.9296768362006046	0.9396054102211936	0.9044136032690228	0.9295122740856403	0.9399872247484611	0.9317250518274014	0.9273991687824096	0.9400578557906077	0.8441531126639363	0.9031798041434161	0.9172392051830024
612	0.9145209553489915	0.9317563796579906	0.9274370648845919	0.9158069869905034	0.9327362236490351	0.9303958403932369	0.923907	0.922926	0.8484852818253057	0.8866361150135927	0.9389634163347497
613	0.9298820679631816	0.9279498419190376	0.9453820877730817	0.9107199367858634	0.934569	0.9306221253229736	0.9148866115902102	0.9242594598002885	0.8050473547583601	0.8620274422088777	0.9181295592043239
614	0.9184828202708658	0.910024	0.9274945446105151	0.9198133304565839	0.943641	0.923414	0.9180197144320309	0.9395346794879678	0.8515251025223962	0.8863798002018982	0.9234602995929665
615	0.9266282539256742	0.9231000042248846	0.922852	0.9250348138954556	0.9211480403974364	0.9386533433771185	0.9198318818529422	0.9284235466949247	0.8330775270666281	0.90043	0.8710106687125192
616	0.9219261177660776	0.9328760405006569	0.9297579493387802	0.8995799217066905	0.9159389221534584	0.9303907281259312	0.9148370146770917	0.9096407918901028	0.8551545143973307	0.8833666528532792	0.926292
617	0.9304147948639317	0.9198091321854382	0.933974	0.9154198274788053	0.9489699522879153	0.9125066782034525	0.9404692565714123	0.9114728082916056	0.8376161432989836	0.8770207146164822	0.9273124681924629
618	0.9367298415743426	0.927309	0.9265869616417054	0.926222	0.9329596464335436	0.9248067361387425	0.9225432852649379	0.9186372035747311	0.8649530847647953	0.873644	0.9245696952363269
619	0.9378319234840601	0.932962	0.9305251536660056	0.9189909170396198	0.9235561188408201	0.9256519604432426	0.9071925241610906	0.9239424718676031	0.8541834328986007	0.8996750027833366	0.9226655873357433
620	0.9269339525549588	0.9211341997108871	0.9164774848633312	0.919706	0.9362257569036229	0.9378542480064741	0.9323638902156915	0.9271371078190767	0.8648920680948385	0.860009	0.9196117497578776
621	0.9333349489033039	0.933128	0.9283809322133103	0.9190302505062906	0.9175834213019878	0.9177226070444529	0.9200032702109888	0.9166772240005296	0.846488	0.8667700432015693	0.9395839389681422
622	0.9306547267802633	0.9161578758213894	0.9122175063411473	0.9086578109642911	0.9085881495727146	0.9352407625045515	0.9311391268581567	0.927156	0.8178040190982496	0.8738040199312321	0.923996
623	0.9296834071595714	0.9258068118709523	0.9224687119725312	0.9083332806108909	0.94628	0.923391	0.9297551296492536	0.935307	0.8239099907446028	0.8973652158842113	0.9357831229776667
624	0.9235223625979954	0.935753	0.9374648218495707	0.9065848647765876	0.9328092784973003	0.9405067901222186	0.9075296647996813	0.9304370342278102	0.8389567223024165	0.8892170273806846	0.9271176745388687
625	0.9204029608362798	0.9270477130036332	0.9236663806622721	0.9178676222130108	0.9401717392225777	0.9407956417992844	0.9158996291586886	0.9009613137996563	0.8445719896049277	0.891704	0.9334059135104321
626	0.9335764888149339	0.930497	0.9200854229974139	0.897408	0.9096549253945607	0.9364724928998761	0.9163684655084751	0.9296752249454427	0.8369795720834649	0.8950715302794553	0.9323925010079525
627	0.9346578066768388	0.9297481795786507	0.9084082267137319	0.9298699691781072	0.938175	0.9377775377921402	0.9314159378120652	0.9147733914939211	0.8363855667892355	0.8839763340832203	0.9423317027214171
628	0.9302782708765331	0.9220934351713517	0.9380531284405876	0.9100591359943929	0.9437931278739925	0.9250987649700426	0.9081520306366094	0.9262540880154421	0.8434460257113595	0.8772024890963221	0.9398028951359516
629	0.92355	0.9243590540725795	0.9169439187951961	0.9365096144359292	0.9375590312372558	0.9057263298954535	0.9103644291903852	0.9311026289167951	0.8023049657094756	0.8910943932848244	0.940377
630	0.9309948702119769	0.9282835456091996	0.9266616230864729	0.9119541604399557	0.9374462645274164	0.9325157530575997	0.9077731036482253	0.9180306878025891	0.8485263950290773	0.8694057389886236	0.926693
631	0.9341494516448077	0.9248870117400069	0.9281525857626862	0.9294155506445059	0.9274747616473964	0.9291716194722328	0.9277277967289557	0.9251021128774367	0.8089484684590342	0.8738590168028223	0.9392079745246902
632	0.9256833961238247	0.9339493861152788	0.9392218059895195	0.9165699227244498	0.9470671904051793	0.9376877397739645	0.9185319726093965	0.935855	0.8390436257132171	0.8946948200338487	0.9211639284808122
633	0.9298855838799465	0.9303787040180489	0.9288502094272794	0.9041884755730479	0.9433730330077118	0.9350095807280061	0.9358443856597394	0.9364709529059837	0.8240440131640557	0.8642994407801238	0.931212
634	0.9218954011294457	0.9231341619849178	0.9362759051301874	0.9184830498237374	0.9200705017529529	0.9146580953930972	0.9365459214422778	0.9213615306691345	0.8490695295645269	0.889361	0.9396682452503515
635	0.9334825826719653	0.9268727554950332	0.938122	0.9292383496920227	0.918591	0.9154067605644028	0.9123810763732164	0.8942148511377266	0.8555258570819633	0.8992679342061601	0.9300797052476081
636	0.9168326887849269	0.9363391540177529	0.9135861830325738	0.9273634113642295	0.9347263428558716	0.913832	0.8984001281414062	0.9255622735088259	0.8563261119299215	0.8563624243669857	0.9354070603157606
637	0.9235084669400899	0.9254151060476722	0.9317324568584391	0.9122278411889042	0.9164697831234125	0.9272457019409132	0.9274630786928056	0.9224678638567017	0.8468642468021681	0.8964541688220079	0.928284
638	0.9064651794814331	0.9343508356006757	0.9268391896571677	0.8789931426447375	0.9383502398420511	0.931009	0.9038363982793184	0.9310859530711033	0.8371623398752265	0.870397	0.9191333470269948
639	0.9343133207158729	0.926966	0.9096446300023175	0.9317225644353656	0.9361402959876068	0.9200820110624656	0.9106846104279636	0.8841069321111137	0.8323525198352046	0.8768196128619853	0.9423701574688472
640	0.9259915998639325	0.9338340726971841	0.9175234144805111	0.9137422152660496	0.9211408876108211	0.9276774461239214	0.9246885435456756	0.881032	0.8571887615705551	0.8961527857554127	0.9264701437548648
641	0.9329472742903134	0.9278053752442295	0.9233114882550424	0.9127043788365182	0.9392689867120975	0.9341250300213457	0.9080836896962575	0.9304057360953756	0.7937163078548755	0.9084174493335032	0.9293947478914156
642	0.9229921004060941	0.9171970509251282	0.9216376348259802	0.9106421547916551	0.9419734012215154	0.9408992723430202	0.889917	0.9123638613867606	0.8420319351479151	0.8866761300290543	0.9151495629951608
643	0.9242171155650997	0.9378167218201875	0.9264639058138371	0.9320941818140848	0.9290956626056075	0.9457682146988686	0.9181017231691923	0.9305781750371487	0.850913	0.8554726255009669	0.939
644	0.9301714129209558	0.9232262730808198	0.9153538979096902	0.9212462177673636	0.911778	0.9051805884490909	0.8997202309747742	0.9144304792923278	0.8601770683941565	0.8638156265381398	0.932186
645	0.9429421252591154	0.9179712616537643	0.9426105308723463	0.9231022113106028	0.926381	0.9405315486487544	0.9087164803149039	0.938481	0.8536984484124961	0.8905128035187228	0.9222841089477822
646	0.9040518778475535	0.9080264882485961	0.9233474164984878	0.9217478192251026	0.9390843831469625	0.9346330546186129	0.9201422515621773	0.9150143829378886	0.8364732222727317	0.8734283300968299	0.9138432959050641
647	0.9448780828190297	0.9451129619141038	0.9123750029532369	0.9371940850132763	0.9329336379361528	0.913276	0.917335	0.8978508219051184	0.8463863236116335	0.8818405321054396	0.9273607019709862
648	0.9226672050249877	0.939798	0.9415541040723098	0.9295377745074084	0.9128421023567508	0.9423922818155209	0.9161186282118926	0.8936704862935362	0.8648834918736235	0.8505187062860097	0.9029862783145975
649	0.9097866180455557	0.9295601937263129	0.9172582100733775	0.9047667840734696	0.9364147139295087	0.9167743893150471	0.930184	0.9387179198530684	0.821846	0.8757898685028747	0.9382196478400616
650	0.8834811328051118	0.919221	0.9258841562818707	0.90956	0.9166736672437752	0.9295101874333864	0.9104989960611004	0.9204075526191908	0.8525790051424148	0.8970448678879999	0.941047
651	0.9275618982673395	0.9265264001619516	0.9292386562897884	0.9185915806157329	0.9330115199104888	0.9391654150160171	0.9225035944458275	0.9355531339895458	0.8556362225122608	0.8523741633528625	0.9248796397928397
652	0.9355110111259684	0.9121806849037675	0.9192721945918776	0.9254831291941191	0.927969	0.9376019348287542	0.9150612044523534	0.9354371384517655	0.826396	0.8939953843557159	0.9353195093985625
653	0.9253943731158477	0.8996851069672143	0.9402391221117041	0.9276333341468604	0.9287234241354438	0.9291848373668128	0.9280200262523546	0.9238595818208668	0.8053072248323722	0.8866470727723531	0.9374661223488567
654	0.9312994070927285	0.9316935617813852	0.9172829000019012	0.9218603625113612	0.943334	0.9331097285140606	0.9079867958615976	0.931531	0.8556383576628847	0.8930193495904817	0.9394981264571481
655	0.9398841670378191	0.9251730349391211	0.9211920041939414	0.9285346598367145	0.9378203100404795	0.9296913469284681	0.9213169755290846	0.9390497132482507	0.8316135537643922	0.885359	0.9073440025507326
656	0.9281213475561655	0.9218636659772478	0.9313120725396925	0.9309206494525075	0.9433088573508837	0.9329178690584025	0.9007868756862555	0.92471	0.8106027455276028	0.8886643839748709	0.9411487620827717
657	0.9432143284011583	0.9269462872783022	0.9224143242723551	0.9312722039098001	0.9201173662324793	0.9352556447393331	0.9127627142436974	0.9195473606099069	0.8466386829538102	0.880606	0.9348273509698483
658	0.9270663185680682	0.937396	0.9211488047626039	0.9162497414368929	0.9161294308176925	0.9255669079356992	0.9236834241858586	0.9294104634998316	0.8251927222457149	0.8716196142545654	0.9358097617440471
659	0.9222025969886934	0.9266603695484489	0.9410616254036624	0.9270635398349657	0.9113677091269197	0.9393516308987808	0.8957251403334254	0.9153717670676567	0.8264739679805625	0.8502668489935048	0.9386342717840266
660	0.9273925538274986	0.9288235256000354	0.9202148057368413	0.9302696803760404	0.9359351886740623	0.8700580911035791	0.9007999575540468	0.9093062700894007	0.8396974001913521	0.8956852087199813	0.9286937568083774
661	0.9372748259729635	0.9078326558173752	0.9368974166934139	0.9259178440395978	0.9401529517988676	0.9255264044296235	0.9305000627231097	0.9287333021725211	0.8437081684604932	0.896038	0.9332436363111104
662	0.9005741159179673	0.9250899682774306	0.9055155581637899	0.9079439798313422	0.9248386594008953	0.9214978730827401	0.9214350367676226	0.93145	0.8129160819009096	0.8578768027158002	0.9102368750947395
663	0.9298143115419657	0.9272515570317587	0.9345806436692156	0.9114476193960037	0.9236428178345384	0.9308516623441248	0.923339	0.9317678321076198	0.8490812490010997	0.8653740983243968	0.9368686104590269
664	0.9076930603122154	0.9292079896683999	0.9345942196522397	0.9179225019430597	0.9353892345272998	0.9208934728476073	0.9198294660827814	0.8906163930295332	0.8518534254356098	0.8698567787334387	0.9333497280671543
665	0.9162105474805075	0.9272780045298503	0.9359880039012674	0.9052341697600262	0.9346012101053877	0.8947984230631284	0.9213941495020619	0.9041133341013016	0.8330524472404375	0.8738401064433896	0.9323160365759819
666	0.9373451512690784	0.9328140230318229	0.9237978608741452	0.9247752237468174	0.9398319995140121	0.8938444785055684	0.9143956047637072	0.932564	0.8065309031772963	0.8852964432876309	0.9303798123890291
667	0.9156242096299781	0.9234996555433115	0.9198076053234199	0.9185206989732766	0.9109748063682823	0.9255422128231442	0.9217450669966405	0.9035479013786468	0.8253891889078991	0.8860507313079556	0.9249968708324059
668	0.9327785562890583	0.9138874032659708	0.9372632519035242	0.9198943708708451	0.9439368741111299	0.9165639702727092	0.9100819851268536	0.9346201912241096	0.8338305465987101	0.887736	0.928449
669	0.9237856142211476	0.925909	0.938325	0.9351132867841784	0.9243650237525097	0.9349137071639763	0.9151469830653458	0.9286678124713231	0.8528870213301191	0.8606365211547381	0.9331018879747218
670	0.9272151051169502	0.9374431686964623	0.913031	0.9140035105793521	0.9353300125253077	0.9336583258191521	0.9081665401697078	0.8964780320827032	0.8154868089940617	0.8704704094708147	0.9340656912536237
671	0.9361128230668936	0.9162871833452216	0.8959587743200016	0.8937719294591345	0.9325811686687542	0.9277132798579786	0.9294104893348206	0.9421901783386436	0.8476626459468611	0.8677352183546961	0.932286
672	0.924164	0.9350658625138553	0.9342111681370356	0.927017	0.949742	0.9314516177214651	0.9301823776945095	0.9159543023909484	0.8447141493314426	0.9085337085192392	0.9402266537570343
673	0.9151980160418924	0.9278972573890074	0.9256065297844733	0.9311511111567031	0.9319921116443819	0.910864	0.9293035643908304	0.9161944668180171	0.8525406530362263	0.9029562869655546	0.9470078602116493
674	0.9265016125397232	0.9239449133484613	0.9325739385079508	0.9301389363678592	0.9267638950432485	0.9219134926471139	0.9153901136516785	0.897911	0.8491923627777097	0.8887908352736869	0.9265092474629685
675	0.9332095641367211	0.944567	0.9234995959449758	0.9278011699280099	0.9260067806394048	0.9449237409733953	0.917257	0.9357915473657488	0.844602	0.8863799206590998	0.9307414214809486
676	0.9222723480951354	0.9206411814843035	0.9355902099257034	0.9054098647154973	0.938539	0.937818	0.88798	0.9090704024044355	0.833485	0.8684218925698991	0.9172265401580035
677	0.9167330673580131	0.9234917857051257	0.9075548590042822	0.9202061882644592	0.9415469399699766	0.9236667253681454	0.9153353611212998	0.9181010000723562	0.8140909472258502	0.8963280545416534	0.9142383982765201
678	0.9261258878938269	0.9269453305361465	0.9169110720426539	0.9266079650913928	0.937414	0.9414141048961365	0.9095320790920498	0.9066215423641344	0.8324466756061477	0.8881958188486361	0.9200521680710959
679	0.9311903477833009	0.9371799416452791	0.9319922033327862	0.9068358963631205	0.9328554605597961	0.9328755610599885	0.9049670427646188	0.9306015046784728	0.818458	0.8894620732404794	0.9449081702283834
680	0.9347850513040133	0.9093924145480903	0.9244648305770042	0.9273472720309704	0.9404955771667273	0.9220427787348441	0.8880359583672792	0.9323158196329271	0.8683879650886406	0.8969804120562063	0.9190096705364593
681	0.9150967698371036	0.9228826297943221	0.9317318801106759	0.9212388956273188	0.9183829904143561	0.9286624338396209	0.9202994962840023	0.9160679405011605	0.8449828238230709	0.8980891740513361	0.9411640655549153
682	0.9213858233409918	0.9066147829228769	0.9095126008487668	0.9340443376558633	0.9299814279712173	0.9473362876504837	0.9012146624257954	0.9210525036879414	0.8368758109596204	0.8982142989939582	0.9305869327116468
683	0.9288358842301431	0.9293239296280349	0.9331358008963208	0.9230248485427756	0.9444781725340301	0.8948557365627547	0.9067068016292115	0.9316170602653192	0.842961	0.8889186000390811	0.9311889357530139
684	0.9310202533900981	0.922143	0.9068413341659937	0.9138659705238447	0.9411815567130506	0.9251191281322481	0.9269446607380317	0.9215026410806441	0.8467602719647844	0.8650754247193772	0.9221902077871804
685	0.9302785408398303	0.9251045699816284	0.9274294248343785	0.8691942802719411	0.9159076225055713	0.9187182856889062	0.9040292723362964	0.9211794769369531	0.8667324934359709	0.8493276590779087	0.9283349708602547
686	0.9140120537768281	0.9277962827351055	0.9255765666535467	0.9195947510176015	0.9452142098172249	0.909757	0.8796304773285667	0.9295706756861891	0.8282788593734338	0.8856555778156575	0.9356169102793763
687	0.9045186662740028	0.9345426648215333	0.9095645324780145	0.9275861935615434	0.9240001655374745	0.9346421991693892	0.900093	0.9364251431999365	0.8384563713661177	0.8257	0.9250386210848516
688	0.9097340486973897	0.933201	0.9116045717705691	0.9292871925215724	0.938755	0.9246238395420737	0.9190466879934988	0.9287704959701587	0.805323	0.8994091701434167	0.9379514835530472
689	0.8968623018293389	0.9194848187887519	0.9266342712206759	0.9229993890099604	0.9351137954966451	0.93345	0.8985259012718233	0.9220270011454318	0.8015888304230451	0.8748260940355795	0.9355005084411209
690	0.9123747621401211	0.9202701975526086	0.9299409702961887	0.9083530399194923	0.92639	0.9428513279282009	0.9057751483645243	0.9287234185920923	0.8552858245202261	0.8806860535551242	0.9234345476388308
691	0.9341534383878841	0.9306368079360415	0.9299821891204204	0.9208308629147308	0.9390138870089462	0.9318594420851732	0.9162858956518037	0.9112565988469743	0.8370748774972718	0.8972131300930077	0.9289118173909218
692	0.9292453024179347	0.8917987632759178	0.921368	0.9325036846577857	0.9303208669521965	0.9178091485632555	0.9210204735947718	0.9363023531569787	0.8489747031824075	0.8884473561277612	0.9285460706964115
693	0.9390970257097536	0.9262821563767041	0.9276466314707464	0.9245206864166782	0.9470424571210512	0.9172289852536827	0.9298081117469834	0.9107828058298361	0.8584891465466361	0.8717279430900092	0.9350958440262055
694	0.92355	0.9191438619925213	0.9284345209107114	0.9046261893868182	0.9408793433242633	0.9375542648397533	0.9130261080747907	0.9037635341928834	0.8388889699910863	0.8835407059257019	0.9423534057222246
695	0.9271211331272668	0.9129924689444467	0.9417278333013267	0.9144478754673355	0.9380052388084649	0.9453791485715266	0.9345938575265204	0.9242924129114192	0.8550769726360836	0.873362	0.9287014250823671
696	0.9222431688250554	0.9338278649255022	0.9380003383677287	0.9245636558892013	0.9430307966824243	0.9301535062461281	0.9261782941962986	0.932753	0.8168473992636305	0.8943241827241737	0.9403907556951382
697	0.903003	0.9177989115681496	0.9038057032445018	0.8879792506653179	0.9045983958103735	0.9401938824951034	0.9221102128448472	0.9380601790863516	0.835569	0.8912975270627097	0.9414546161139418
698	0.9067198265460078	0.8941466047140779	0.923516	0.9198540976972822	0.9357368269215152	0.9090837980337472	0.8774867833684681	0.9273174884568043	0.8628582026499991	0.8554421872719535	0.935299
699	0.9387632632553033	0.9280821266778128	0.9247032811995275	0.9293855136896351	0.9248744596092745	0.9205222209753152	0.9246586778648165	0.914122	0.8554388190616629	0.8917391607475499	0.9274694169537087
700	0.9402136262619568	0.8968023185747439	0.9190017593654268	0.9144831918253508	0.9310312198738213	0.9450056984705759	0.9092290712219081	0.9074941093046541	0.843571	0.8698175018581761	0.9236447267777744
701	0.8920299470872374	0.9215993048577205	0.9179533321054978	0.8903233986602931	0.9495191733781868	0.9140714079725973	0.9191170234649827	0.9245875055196486	0.8660497202491789	0.8823644360546642	0.9270703305744781
702	0.9168625615429639	0.9415976222529552	0.9237734611220779	0.9096664398020523	0.938405	0.905756	0.9275450845123324	0.9055979011920524	0.8630541870374762	0.8956751874069946	0.9223260111701305
703	0.903383	0.9336648077853718	0.9094738203121762	0.9182257662083064	0.9081991146344331	0.930609	0.9212745778485545	0.9137223125348417	0.8514968165593189	0.8946279693745186	0.9349295047838374
704	0.9269311136360253	0.9409646965766403	0.9269280779604492	0.9204848410774047	0.9355426738834518	0.9205065964096829	0.9283089050795147	0.8931914581436395	0.8318620156562364	0.8823586952518446	0.9261598183312002
705	0.9279205385042356	0.9331769706749101	0.9377289544628586	0.879663	0.9237460451176577	0.9232176975774988	0.9189112439051168	0.9302089538869365	0.8209134615384616	0.8827396293797478	0.9394558801374611
706	0.928027	0.8971933989351903	0.9283840756580779	0.9122315874892363	0.938037	0.9303303390515922	0.9188421793273621	0.9247043414615389	0.8241826240547476	0.8568544774281587	0.9376847927888348
707	0.9269407512027126	0.9266871176898855	0.9257536457526685	0.9032483052275174	0.9333587724024783	0.9264521486802721	0.9052993584026643	0.8690820529940193	0.8482226453991515	0.9037195756707951	0.9297959436017209
708	0.9386244272386585	0.9302644028372948	0.9230563559142936	0.9132274325324338	0.8935982434495497	0.9501852237985828	0.910019	0.9196578661143131	0.8114940738779801	0.8584909714160743	0.9172077165186681
709	0.9371774727472746	0.9071397404837553	0.9049262663043005	0.9304947697219693	0.9392465343270298	0.9192156136903823	0.9081881575866452	0.9283895798694124	0.8475129496379089	0.8830038991049939	0.928263
710	0.9054195907167258	0.9404946153093796	0.9439361772828693	0.9009516386886212	0.9278046690084343	0.9306964386928033	0.9104430689208761	0.9114937518141892	0.8450749373275313	0.8654651673183557	0.9284991175723123
711	0.9165026151567909	0.9240487969985132	0.920832	0.9195278901777175	0.9335590377567942	0.9279175196390217	0.9275961800635865	0.9350911345180115	0.8413056391641984	0.8975972749595225	0.9419566162312255
712	0.9332742157678965	0.9213808890909481	0.934579	0.9202859803661636	0.936098	0.9223244664093848	0.9079892238150444	0.9296273751871751	0.8022676193979037	0.8913731705899838	0.9293982832166073
713	0.931904	0.9217053597242454	0.9341117738427575	0.9287579731400908	0.9221184297803878	0.931262	0.9067481668066798	0.9246346414465938	0.8537046432790814	0.8730659110066208	0.9290713109164644
714	0.9445318043592599	0.8943253255261591	0.9065934082757302	0.8960018520006109	0.9411253353303505	0.937128	0.9278961252965472	0.915086	0.8621789751781765	0.8909736971952266	0.9213264546412546
715	0.9124989097848676	0.9230348571592438	0.9335888479029403	0.9248130945620091	0.9300145249679058	0.9292453891810555	0.9226000459546327	0.9273667956235039	0.8193921717915126	0.9015980820355612	0.9312899753208426
716	0.934545	0.9207001131971247	0.9225140906421279	0.9313767205011639	0.9486782093366138	0.9244775142927422	0.9254233432922055	0.926364	0.8445435028104711	0.8961711090540475	0.932915
717	0.93326	0.9082017174062377	0.9306528680358142	0.9060087500450684	0.9332357065681376	0.9180735589541259	0.9087639880502507	0.9242686961090553	0.8585147094514943	0.8699094648780049	0.9351579682514785
718	0.9245603013206862	0.9059854965349691	0.9218036590947148	0.9251607150155888	0.9389318544536878	0.9169767799983443	0.9255811397271864	0.9378514604798452	0.8614238070540085	0.8678143676876681	0.922773
719	0.9432358130445315	0.8908529434980093	0.9327140895464685	0.9162484136681092	0.9011651228846962	0.9165404078259081	0.9218078721019323	0.9167013605116465	0.8503437386676438	0.8719134254492875	0.9242891396637416
720	0.9327008675313488	0.9307036752601954	0.9087715640166555	0.9299991023889532	0.9323010108032714	0.9262013383687678	0.9195579692929203	0.9213426194804828	0.860141	0.9021022873096206	0.928412
721	0.9081792443890817	0.9225151064547442	0.9339527601545226	0.8966472654533799	0.9238924218123435	0.9287337265660068	0.9015829160824957	0.9212170786064438	0.8376536485359882	0.8765961136013636	0.9324927205320129
722	0.922279	0.9299393587691361	0.9269700660812107	0.9087690637213292	0.9320109172671766	0.9396720138479076	0.9310664690357574	0.9271456232962649	0.8608037262047421	0.8969924894003712	0.9044425282939647
723	0.9259173741331621	0.9339649174382981	0.9277050347697298	0.925767	0.9435776173876754	0.931161	0.9250139255321486	0.9335847492991165	0.8379888342319991	0.8958150960529828	0.9374788749411624
724	0.9176307278574974	0.9336010080208822	0.930213	0.9080114445995452	0.9037070030817338	0.9446356408814367	0.9139570448525676	0.924602	0.7987505056310694	0.9011102998644342	0.9173705669808581
725	0.9282105401042376	0.9176225385893565	0.9248149381096153	0.9128773743682644	0.9198200744582653	0.924286	0.9206577403453793	0.9241492654610682	0.834745	0.8516689849446739	0.9343221848968783
726	0.9163297528181162	0.9112207914797483	0.9225320548822779	0.9220157545280725	0.9459102534656814	0.9290997960767673	0.9087763139173815	0.9375367314865999	0.8494427104751943	0.8839168511664425	0.9442179551590527
727	0.9260958381670401	0.916201	0.9327137447800274	0.9262696888715364	0.917183	0.927777	0.9187877268849928	0.8905792811537743	0.829024	0.8956719165809829	0.9436309396985731
728	0.9062361621898534	0.9088259894237887	0.9096563724482627	0.9175040178284029	0.934796	0.9426779976842348	0.9201275772881002	0.907231	0.8436344323620824	0.8834148615317791	0.9213060806019653
729	0.9256788339671118	0.8975046771352809	0.9115453204943779	0.9181442904575583	0.928552	0.9335986231373112	0.9100642579841068	0.9133008116686863	0.8526818556470344	0.886878	0.9221169673628086
730	0.9295566791261722	0.9352559512548869	0.9245547188970678	0.9146419816216494	0.9350237851654646	0.9133606177236583	0.9358858672437946	0.9250878386113502	0.8310507627031276	0.8433435660984733	0.928439
731	0.9303886185939193	0.9165202172413494	0.8887412134324525	0.9176888322677434	0.926569	0.9379030143270859	0.9194955396379992	0.9264650941129322	0.8382433115414084	0.902065	0.9281053230086038
732	0.9395933071498954	0.9100869743158272	0.9322509295899166	0.8901476804216998	0.9048922728386284	0.9255427628601768	0.8799927137238343	0.9158019051674978	0.8370082025070658	0.8876613059913332	0.9432905156982775
733	0.9273269790995157	0.9343342009908067	0.911146	0.8975878788270212	0.9447549389740866	0.9443303189935545	0.9032679798398916	0.9206018951994892	0.834487	0.845554	0.9067917228852741
734	0.9376319462202706	0.9229565294998887	0.930872	0.8624132902145959	0.9316249260659965	0.92082	0.9178350524830879	0.9206789072030485	0.8430334883498013	0.8851430741833073	0.9431629899729015
735	0.9012234356991284	0.9307598199944278	0.9263033610889037	0.9237095487551589	0.9304339757232398	0.919278	0.9160998566160043	0.9233962115523604	0.859709	0.8400986100699215	0.9206891826126058
736	0.9189014317100834	0.9284034074421007	0.938553	0.921373	0.9323704978784735	0.9207472144152872	0.9354764919250356	0.919124	0.8453090137925825	0.9005713966352774	0.9304065692990917
737	0.9252067060261393	0.9343767589399512	0.9307166367396569	0.936708	0.9429521540421109	0.9279677647698544	0.9036017547344323	0.8903270387081739	0.8680860805860806	0.849907	0.9150729034865992
738	0.9348349815287145	0.9301659853277175	0.9277535749397577	0.9098749881381379	0.9295918054723382	0.9318035417696936	0.9023713428396889	0.9199250503820805	0.8605874957950476	0.8900900447825603	0.9419407651951627
739	0.9173801265809812	0.9329684698412775	0.9337820960026407	0.8943996651200631	0.9293753127960651	0.9214353457753365	0.9191034961406352	0.9156120983093569	0.841362	0.8868620404399034	0.9218277664082861
740	0.9168679464927987	0.9212229339100269	0.9227716041829851	0.9158804649007268	0.9386159870013686	0.9077413650666352	0.917522	0.9179871623927319	0.8483806920950122	0.878216	0.9437084092189313
741	0.9258513131238304	0.9194179843945818	0.9276774883580381	0.9332608390947303	0.9313759813780692	0.9384383624716546	0.9260558926658327	0.9291613783612518	0.840918	0.8975409065028788	0.9406307092899128
742	0.9288271190075325	0.8951029099639833	0.9354752992699931	0.8876361188809192	0.9385884595955903	0.941813	0.9176083590486479	0.9244976316187234	0.8515803393680283	0.8930435385758365	0.9331255938644073
743	0.9224123355215575	0.9323667815154679	0.9113513223441685	0.8886105882190531	0.9332614708317408	0.9330294664085943	0.9224983105573655	0.8924017093371315	0.8328590946415593	0.8954784961058397	0.9226974273889194
744	0.9375316348291461	0.9299611689321742	0.9130346415085482	0.9198514602444696	0.9419965376898788	0.9280085623161891	0.9279965837658779	0.9217594881435675	0.853487	0.8860211690527765	0.9271058813874163
745	0.9336763301884449	0.9285868959933563	0.9260616190419186	0.9275365963652118	0.9229898468489443	0.9430167427228762	0.9163101826725024	0.9200209145958519	0.8468070969909569	0.8865699286179628	0.9384916328954883
746	0.9310332710895272	0.9276809291364633	0.9385032258495668	0.9126935084073964	0.922761	0.9266155734460235	0.9176825062339296	0.9201925466071958	0.8581563389138758	0.846267	0.9120507663195613
747	0.9141924133788125	0.914181	0.9365380633711787	0.9066133997124325	0.9296665815714507	0.9236492299496186	0.9312602760249509	0.9311788147298613	0.8478352408001536	0.8775820562389017	0.9340292678636315
748	0.9053515828472934	0.9081468110628231	0.9135542219867625	0.9016736070921613	0.9300056391141656	0.9216572008138798	0.9203309009397599	0.9205121465452816	0.8368528921634735	0.8734722648925201	0.9246655296963949
749	0.9282650124102138	0.9039622043081916	0.920801	0.9206978390974991	0.9262197249370034	0.9164864756579847	0.9323394509170484	0.9282505975266233	0.8555516133397765	0.8704379342281005	0.9231206531976507
750	0.9345959159755595	0.9146193982827272	0.9328957237727825	0.9039478425844429	0.932982	0.9365350400413289	0.9228604817135226	0.9164150348330408	0.8546260040016395	0.8791011098329626	0.9390970832167749
751	0.9362682203537015	0.9266607095178612	0.9359995921514845	0.9180099166229904	0.9305793203552766	0.9404699668416062	0.9189361619635082	0.9162203654251241	0.8481178723807294	0.8668251693897786	0.9016132708098468
752	0.92299	0.9219707287404846	0.9290159884703506	0.924018	0.9290903010749261	0.9201946155803831	0.9169820067848604	0.916104	0.8687366343616344	0.8922685384091097	0.923925
753	0.9237999854970417	0.9245596721483018	0.9369573978978445	0.9259997793473176	0.9346443403695918	0.9169822976623682	0.8872	0.9418200659202997	0.8534877828265974	0.8898697361298508	0.9372523083147452
754	0.9263260748074542	0.9273269540641191	0.9324737915595566	0.9037410509101137	0.9132090684222915	0.9248503570789146	0.9117608151885307	0.9007793833374863	0.8696924603174603	0.8669553685440748	0.9388780724512811
755	0.9388571444485966	0.9229541956646136	0.9408613928140065	0.9222896845597259	0.931903	0.9141600028993087	0.9260201348821598	0.9139605546752781	0.8052878376397303	0.9006487714560137	0.9173039776127164
756	0.9288717975246665	0.9197262899090562	0.9377997703877492	0.9012456332717916	0.9319876591623064	0.9306308844829857	0.9343328416409029	0.915171	0.8495691384511306	0.888544	0.9105747768011384
757	0.9238696764916302	0.9288491344083366	0.902865	0.93975	0.9369001769668772	0.9248017186072781	0.9252803767835703	0.9211953915172532	0.853104	0.8768162639365099	0.9461603958309311
758	0.927986	0.9283147930596566	0.933989	0.8991262057908999	0.9419907038684205	0.9287228743245446	0.9138937670800246	0.9287260807099748	0.8542352696416488	0.8939962108141118	0.9397633355760874
759	0.9369061935307686	0.9347196627950183	0.9357693941281986	0.9007174569736058	0.9196015143134427	0.9187189123939573	0.9207051883103271	0.9220700137652981	0.7953850790426431	0.8959779638983436	0.9394351732997764
760	0.9220319924475432	0.9283190745857641	0.9089599408722109	0.9061084948078968	0.9421570519021998	0.9302046722664796	0.908775	0.911456	0.8411811097071448	0.8730016052847304	0.9096740019747366
761	0.8999509380656724	0.9328318983803795	0.9181420426114633	0.9064803749540211	0.9363458372771336	0.9430244661188374	0.9402181101226654	0.9250941295310173	0.8283951178852296	0.8747386179506033	0.9372640854491615
762	0.9323212697167553	0.9319614652708903	0.9237351642482302	0.9349660745531131	0.9273208282497954	0.9334587620269075	0.9163057726526312	0.9377912704102268	0.8625517390649737	0.8931422806710304	0.9425486219344846
763	0.9219692245847992	0.933325	0.9058845312762257	0.919524	0.9255260905569102	0.9301980123249882	0.9269001151225528	0.9288804965107959	0.843663	0.8428311002550549	0.9268299846517599
764	0.9178350674856934	0.9381005399882174	0.9331420492615368	0.909125	0.932556	0.9316168642454074	0.9311059779047528	0.9016124734631822	0.8278107266100265	0.8755949887998254	0.9441954871148938
765	0.9231070135759117	0.9343713464899437	0.9180856739653603	0.9333151826592825	0.9440339740723418	0.9198827798148941	0.9169078731009431	0.9328045092780397	0.8554431725458234	0.8681835693428076	0.9429556601545663
766	0.9239215156230988	0.9245812104433058	0.9291076177780084	0.935198	0.9347718774168513	0.9432046594814159	0.8614983129536021	0.9140557334579884	0.8398428452644597	0.8863085606174201	0.909501
767	0.9089840970314534	0.9305771679473179	0.9351711016864194	0.9345678087551575	0.944177	0.9254441187701479	0.8638911057074101	0.9123703877844016	0.8106317376238825	0.8774300742078952	0.9133968457625466
768	0.9182260147918431	0.9256133235312612	0.9310255426405183	0.9238957376291409	0.9298141616449931	0.9193925077174911	0.9060152151580688	0.9335846331775511	0.8329752398294104	0.9021834618877729	0.9290572385874276
769	0.9037433105923253	0.944626	0.9374653611821563	0.930161	0.9331948350058106	0.9365750434551012	0.9173678005034036	0.9098573431917432	0.8142662659714219	0.8741070312848747	0.9239559095796391
770	0.9333318122702486	0.9340958288219464	0.9148183514067417	0.9161333461790927	0.9296764203420977	0.9322689260333923	0.8981990168066182	0.9386592654009922	0.8409636276066206	0.8433993127891063	0.936594
771	0.9398122989379971	0.9080643932787968	0.9376311746227805	0.9157129000684655	0.9410738283036166	0.9358869895763104	0.9088541802322618	0.9260643821691436	0.8617298303387352	0.8909431060393302	0.9418240053084289
772	0.9207435451076043	0.9233539884652018	0.9118666723487072	0.8958825012791611	0.9284193304981372	0.9059095552872545	0.9343221873251849	0.9081545376211126	0.8157621907988697	0.8908466151093077	0.9225132830158838
773	0.9338252213446481	0.9314945739500529	0.9368479765272384	0.9132078493488162	0.9219877758347543	0.936315	0.9141156525253209	0.929743	0.8485956256490518	0.8817541083270495	0.9392698271854133
774	0.9229203692890395	0.9194278220611832	0.931777	0.8860627239652401	0.9281289131486345	0.9294877504685198	0.9232672599579179	0.9204880048726055	0.8379237184382644	0.9054828170173699	0.9144605738650935
775	0.9198580658947612	0.9142141106467803	0.9268445506910429	0.9175559468252029	0.915245	0.9265636479868546	0.9202826846697119	0.888208	0.8043633697625804	0.8318534614123928	0.9272750508794829
776	0.9287022693423648	0.9363107694318162	0.9311081830122168	0.9126481603343147	0.9280764321332343	0.9292857033785376	0.9030508450550776	0.9028163835437879	0.8555845458739275	0.8856697689596439	0.9322831559817331
777	0.9239299707250713	0.9293784532895758	0.9170281432775579	0.9313359906916343	0.9166067038190553	0.9238507424702386	0.9178660337799848	0.8965604724869449	0.8478178030785328	0.8573006222724823	0.9124949012251641
778	0.9319468332486928	0.8966473425360265	0.9307688432888336	0.9010867074588603	0.9390636345103287	0.9155861391871745	0.9276369486013699	0.9037867014011577	0.8655127470349487	0.8716781093991379	0.943532
779	0.9214721118386899	0.8829115998820362	0.917748	0.9195872880338467	0.9302619656842523	0.9329337875432345	0.9362639991175721	0.9143611788956858	0.86101	0.8890957878049489	0.9270554044763982
780	0.9181882808279356	0.9153668930834095	0.928236	0.9269969712350857	0.9359854382379602	0.9276783839689039	0.9330828906998363	0.9226164291151722	0.819836	0.9039813451861175	0.938246
781	0.9384336700467679	0.9133404939375117	0.920336	0.9164347833390153	0.9379086332753468	0.9190898976618779	0.9214307103230197	0.9232600088114907	0.8562678550059668	0.8700022403784757	0.9219295251622979
782	0.9238552731537034	0.9226295184836175	0.933668	0.9147846097519495	0.9301314993873409	0.9289442820509918	0.903332	0.9250265297832194	0.836843	0.8297150335217603	0.9460196435393633
783	0.9094806691263457	0.9285458991539298	0.9252667818157102	0.9195889584732214	0.9362764661837315	0.9358955718513002	0.9101384158186261	0.9205936881336818	0.8534755617031452	0.8803337495816952	0.9414593523568742
784	0.9170929843316017	0.9271102630312841	0.9252313792759408	0.9179864637259759	0.9227527933423478	0.9176813392384898	0.9203628594680168	0.9213316222514994	0.8555647176123747	0.8911781720272458	0.9194992135196353
785	0.9295693679208189	0.9222509973356909	0.9371862789749896	0.9217418227748183	0.9511033189923221	0.9240161025340647	0.9281552114566425	0.9157663810995165	0.8153733747820693	0.8881373317626989	0.9380612308007883
786	0.9273886792955537	0.9103473084934509	0.9269673529563918	0.9120522119517722	0.9072694590880944	0.9423737776485116	0.9127040546160805	0.9104729091221913	0.8617090374902875	0.8449125522402192	0.9284409158637216
787	0.9241309729149522	0.8878660688094981	0.9246371440377968	0.938266	0.9314228900506203	0.9478939436723434	0.9203414183772792	0.926295	0.84701	0.8212217828193388	0.9460093719820585
788	0.9425689622965245	0.9259860735323632	0.9081211930928107	0.8890372282461905	0.9263207422940264	0.9255301463442871	0.9100516712186905	0.9362055433330191	0.834721	0.8954315489711359	0.9344431874669893
789	0.9354736641245311	0.9240664702544765	0.9167705397653397	0.9280362486193788	0.9380325880688898	0.9130851139528415	0.9135836753379261	0.934627	0.851522	0.8934993473202701	0.9221832753384611
790	0.9453691084773325	0.9126191775680474	0.9269322193868147	0.8916684872637323	0.938629	0.9313041198159756	0.9041009026500667	0.90076	0.8644547748566511	0.890208	0.9409957720594249
791	0.9299209887689562	0.9144859632848109	0.932895	0.9126848483564882	0.9272689557429649	0.9272098222036818	0.9073756181529388	0.9428605147491176	0.8657877472499147	0.8803498595088516	0.9217668321133251
792	0.9116410964230175	0.9163152182510882	0.9109600065871679	0.9290240775559305	0.9294549289956895	0.9092261771566936	0.9025219600302302	0.92839	0.8115986624057079	0.8920143899582715	0.9420772383343201
793	0.9225055416087555	0.922933	0.9280464396098084	0.9303852315346735	0.9413429303447334	0.9379073806026202	0.9268412444323881	0.9261567943435636	0.8118664934777531	0.8801027298042654	0.9339601425048302
794	0.9207538453880036	0.9373068759651264	0.9323948283399695	0.9244623354072289	0.9141060094630493	0.9243032279010971	0.9319447066506261	0.8675437971178053	0.828707	0.8819832602363197	0.9296579630824772
795	0.9203005533455216	0.9289701038637788	0.944618	0.9129989592436722	0.9084282201868443	0.9218831437231568	0.9112858727796949	0.9201924749076136	0.8346276326492343	0.887986	0.9455982616867677
796	0.9321427075877897	0.9198278136208825	0.9372235173992391	0.9022094889606357	0.930091	0.9435775572885005	0.9203402982870559	0.9167314757399584	0.8535842084061561	0.8850709077357671	0.9243010567128984
797	0.9163619156085903	0.9325908620205019	0.9040182072276784	0.9232562036225183	0.9348661884242925	0.9179341663415631	0.8825268545383973	0.9291643510979769	0.844018	0.8794037664303024	0.9355224305607556
798	0.9324180010950958	0.9310623053720607	0.9426505860837766	0.9167128428585094	0.9328249289777397	0.9335906698931127	0.9286040633899151	0.9230318261783915	0.8637427953555866	0.814582	0.915516
799	0.9382026798233252	0.9249073086584289	0.9343551503594947	0.9039874862560389	0.9440976591812862	0.9152764941524828	0.9372428596618809	0.903531	0.853165	0.9046945875776479	0.9315952865703483
800	0.9267376085862399	0.9129071950071915	0.9289268158809386	0.9136646379632903	0.9353853385742541	0.9198902132216028	0.8602903112016741	0.9313109803552945	0.8565814499756259	0.8800841695775617	0.9236992641053081
801	0.9266440695391209	0.9069868148266729	0.9198651184214829	0.9221938419121841	0.9270554996160403	0.9420699296926235	0.9210689673241191	0.9266542749921749	0.8503332251009255	0.8880737532230935	0.9339201917533545
802	0.9245498673167788	0.9250277620473164	0.92173	0.9129327059995721	0.9339803751744673	0.9276844074974413	0.9092899827663655	0.9181316341802453	0.8446371469349646	0.897137	0.9213746961508922
803	0.9272363186264496	0.925358	0.9375648997002212	0.9205175806795004	0.9191823590854242	0.9389358738519246	0.911861	0.9084197364164188	0.8225419907932663	0.8599625172683224	0.9056090042043374
804	0.9296581241247752	0.9080805666661624	0.9295988146552436	0.9224002726002706	0.9270281900801767	0.9196259446849742	0.9234569251845315	0.9231148046899986	0.8122006929281591	0.8914729470878399	0.9271348276097796
805	0.9303928635753724	0.9324749282444986	0.9287681408030425	0.91403	0.9341751401756793	0.9095273049365702	0.9126082860721155	0.9160666365838085	0.8659256670261938	0.8620831380111714	0.9306644509646157
806	0.9213486970858025	0.9313249102000495	0.9211539572273809	0.9217830820407736	0.934834	0.9068367596951178	0.9150544778991647	0.9201483920865873	0.8499252043697336	0.8550276840819375	0.9324886887590415
807	0.9133217003255772	0.932684	0.9292137588744117	0.9139561112028596	0.9300073556999269	0.9273668268614592	0.9019766660347892	0.9248456838821996	0.7833465198242047	0.8561749129493287	0.9364568921266518
808	0.933773	0.9321927101215051	0.9179768872316385	0.9258444649124886	0.9302834551428255	0.9253210033215719	0.929551	0.9329382604180435	0.8235143927433617	0.886252	0.9002602796283041
809	0.9189680065842732	0.9348255193594837	0.9209938671063083	0.919314	0.9377968353436705	0.9251640109130336	0.9076267393155999	0.9291792234181112	0.8333173028939366	0.8908458812036217	0.9287607051335675
810	0.9064727383340871	0.94352	0.9001708023659807	0.9249495743692496	0.918435	0.9319159626187922	0.914284	0.9201442916821745	0.8230889155168682	0.886972	0.9330238559758641
811	0.9336761900933436	0.9076081233262193	0.9144257738343489	0.9304991735134098	0.9394906076428026	0.9225540677509179	0.9174964121702189	0.9319800080900777	0.7847232397077282	0.851507	0.9299578868295909
812	0.9037908623436753	0.9197128571779187	0.9218894748069518	0.9166039683640648	0.9195459549582732	0.9362722159688389	0.9026561281490857	0.9348310756534793	0.8487460245781392	0.8817474784765914	0.9412059702339463
813	0.914058	0.9323122038235401	0.9346410974139759	0.9313106318786118	0.9201123455868768	0.921198	0.9276313737703592	0.9256561144749698	0.8192070333134005	0.8927444688557791	0.9092531545302198
814	0.9245739124554287	0.8920435637159366	0.9125901887008424	0.9095115011866551	0.9317741397962466	0.9351147779489222	0.9143213037517259	0.9352266005315195	0.8134451115968623	0.8512958086887515	0.9360618446913188
815	0.9195378876782554	0.932136	0.9215318710126541	0.922434	0.9429327933812891	0.9241943062607634	0.9119779387948865	0.9203058266430685	0.8523918686103146	0.8730761626423497	0.9375024460075743
816	0.9313411230201927	0.9348986692434428	0.9251277430365266	0.909015	0.9358460464918423	0.9426111509531993	0.9299056951136997	0.9158813869802991	0.8285649242802412	0.8933176895920146	0.9429985445499315
817	0.938648	0.9137542112502296	0.9147386920577302	0.9191736550079059	0.943369	0.9226964832027333	0.9227447748396582	0.919967	0.8572741107597646	0.860767	0.9224634119386591
818	0.9162650918070457	0.9220256992571697	0.9082285569152947	0.918935	0.9323039309417649	0.9103977722629175	0.9128720878607305	0.9129919541279005	0.847692	0.8798122223060684	0.9115323263479678
819	0.9150663236400103	0.929881	0.9172545902602884	0.923272	0.9219354807737222	0.941807	0.9230473696511179	0.9385691716845215	0.8518656323646092	0.8684538615803593	0.9414118072754919
820	0.9216398788711498	0.9329709425217642	0.9056560170186627	0.9115818997701631	0.9332650846537304	0.9216089213106533	0.9229298445523066	0.927566	0.8181295337545338	0.864433	0.9412953310178117
821	0.9408130389336898	0.9108493993930953	0.9342272198877825	0.9248886664054118	0.9362684052088888	0.9088490527016183	0.924632	0.9317423048976248	0.8070915656922952	0.8768633768261157	0.9388141585588993
822	0.9286220848920691	0.9214574278029755	0.9162482730512184	0.8727911886766102	0.9438438623191976	0.936399	0.9394439090910223	0.9281983692905633	0.8542993660671061	0.9009173056234977	0.9284424866165183
823	0.9127695394409309	0.8974022144358854	0.9348260462600658	0.926486	0.9349460857929066	0.9310810470191636	0.9143083742639833	0.9331917934570926	0.8345919368549501	0.8997523035435494	0.932091
824	0.9376455976656545	0.9152505878560488	0.9283212844021889	0.9001204540953303	0.9420497014484358	0.9403266052923425	0.9110386953823905	0.9228015674605484	0.8316510017728884	0.8895288075683035	0.9205318612963862
825	0.9140386202512616	0.9366721797290392	0.9209569013966857	0.9139735014020306	0.937998	0.9272429237367101	0.9171381286310584	0.9119118074889998	0.7773461895033287	0.8933371434551264	0.9435551696466239
826	0.9246502409077807	0.8924577469265953	0.9215395288376119	0.9187756478353762	0.9368348065649317	0.9348698358448508	0.9149660263656626	0.92443	0.8487030699462852	0.884483	0.9368315075515005
827	0.9229514736042539	0.940161	0.9374795972475125	0.9256459702200508	0.9431303092457766	0.9368928039287138	0.9104796309755614	0.9224281821031758	0.7550565459648244	0.8850088421310381	0.9340171930230042
828	0.916598	0.9235928229629782	0.9187919070846934	0.9298472641342578	0.9464459103766073	0.9367985503981718	0.9213324983691784	0.9217535337144139	0.7962184824668108	0.8956799319279404	0.9098683940769264
829	0.9369169470350498	0.8997815837762728	0.9266886642736665	0.9198827683501741	0.9168524506541351	0.9302285680072483	0.9218046345165256	0.9287331884231317	0.8342784390469832	0.8948130136107314	0.9274203396019833
830	0.9325450380345902	0.9305828115750386	0.9228268776218231	0.9049030574364305	0.938302	0.9233349878355122	0.9098982861769878	0.9245977940209653	0.8554056393823213	0.874602	0.9350912193870893
831	0.9102732432248047	0.9190286608736925	0.9096950864955363	0.9298960201868358	0.9318208967312374	0.9265480782000656	0.9321812029650234	0.9434151908103818	0.8474901024038353	0.9046310187495307	0.9461181792901594
832	0.9247851088708972	0.9190123435424908	0.9279611528640714	0.8887249712606118	0.9373388405513847	0.9401067579361189	0.8876146049696263	0.929331	0.8604529502239606	0.8793369712276021	0.9381428014163972
833	0.9382852752412115	0.9301867989327117	0.9409832606926584	0.8937251314224192	0.9216692957891964	0.9461906775520997	0.927622	0.8999112066161848	0.8534217779407355	0.859933	0.9257943709317875
834	0.9311420362569077	0.9254133112716505	0.9230722317189338	0.9203790004566357	0.9441139639222921	0.9082185641828046	0.9230154238145267	0.9264154749436971	0.8532494591145277	0.8761070756550281	0.9320947806270672
835	0.9289409217237733	0.93643	0.9152233545964562	0.9046409339026215	0.937406	0.9340232049776056	0.9349295858828776	0.9352908371644594	0.8375585643763657	0.868475	0.9258221340204131
836	0.9327353142405566	0.920577	0.9226554318894628	0.8794121183084624	0.947898	0.9362673578379533	0.9304681865830997	0.9148504898345753	0.8555139788701145	0.8857793797778147	0.9098869492173965
837	0.9324468716022055	0.9361643807977127	0.9103373280576327	0.9192760102248603	0.9213033903453393	0.9440064453585305	0.9271623212324718	0.9406711738184123	0.84766	0.8986128062011559	0.9371804706483913
838	0.8995389000320078	0.9309259267606235	0.9253042682310217	0.8951948225310655	0.920794	0.9348548754031555	0.9070745503497268	0.9094101963298692	0.8614222388975722	0.8743249479970353	0.9158816166360483
839	0.9278410802379318	0.9257116262514925	0.9271207217093418	0.9138092436146675	0.9308667782236231	0.9302840344988655	0.930203	0.9328304190857664	0.856808	0.8972663517680127	0.9207772308015899
840	0.9232450649552252	0.9207119600067522	0.9132885103517928	0.9326010722217256	0.9307617134593162	0.9302426976817144	0.9236752245570037	0.9213985672833971	0.8572960281295163	0.8350803268097096	0.9423175571296498
841	0.9109548158826323	0.9276378774211543	0.9220824439166344	0.9235266874814105	0.9318438652227403	0.9172041921725739	0.928409	0.923642	0.8533178970435487	0.893318	0.9409278126295725
842	0.918229	0.9248207562253056	0.926356	0.9126883187148782	0.9122258995300856	0.8979870769478332	0.92436	0.9305739755194853	0.8407433285376374	0.8835440136599028	0.91727
843	0.9402731043837135	0.9374398208764025	0.9268813504976754	0.9133593195428322	0.9391805803969479	0.931356	0.9026956863718513	0.9271480943273331	0.8439206724955588	0.8826363491939189	0.9354299080170566
844	0.9330592267312747	0.9301808734898684	0.9119771435190788	0.9169371615184496	0.9409185212958568	0.9387278305971314	0.9192090362184742	0.9219643935628283	0.8265782851460719	0.8753315119329267	0.913862
845	0.9224347994790193	0.9338961843915136	0.9229549350167288	0.8987455125980156	0.9244404187585082	0.9345652706711303	0.9132166630498686	0.9317737100224961	0.8273751718583486	0.8894770375680601	0.9217349081646925
846	0.9237581249645134	0.9282594237772829	0.9294165649346589	0.9273268331587977	0.9384042003167974	0.9163160772652065	0.8853996848709731	0.9292284642857109	0.8287842990152376	0.8702319115849365	0.918267
847	0.93313	0.9285547588093236	0.9416786272428266	0.9228810009572238	0.9196257695838284	0.9365559758914777	0.9201978250081221	0.8903426850542548	0.8663614748023716	0.8955954638802278	0.9339079283303978
848	0.9403562505533516	0.9246419106507389	0.9296756609254774	0.9223234499431292	0.936533	0.9044301106413015	0.9249640943605135	0.9222691508935972	0.8437376749716847	0.8693748448674667	0.9373500447035773
849	0.8854838725378739	0.9260067428982117	0.9207611456614713	0.9245531717300657	0.9270951817659425	0.9259894829739509	0.9328096131913243	0.9214112740722578	0.8373025245122606	0.8800699348107296	0.9391332852879938
850	0.9277293400693142	0.9111176524056871	0.9232271680398436	0.9371085109332696	0.9255395761580348	0.9390936898284867	0.9018951551467013	0.9172856050918543	0.8160518678381404	0.8884560620485681	0.9066430181992168
851	0.9273251446161178	0.921234	0.931097	0.9238446670855353	0.9213399339170547	0.9297374619639782	0.8946437737199782	0.9371230701906526	0.8273582308797154	0.8886574793152419	0.8939226071967802
852	0.9239962140353771	0.9231428856663446	0.939457	0.9144508966070156	0.9335218257667669	0.936933	0.9108626658676499	0.9355435398914114	0.8533276778198653	0.8793489267713862	0.9437075591183587
853	0.9269281567733724	0.9368632640586428	0.9239065252019009	0.9160122722391553	0.9189209029780097	0.9248380348699543	0.9292988911403905	0.9238680098857417	0.8505127948690281	0.8757628825594903	0.9437263328226279
854	0.9193780492583044	0.9286760372632202	0.9274756080170143	0.9246268248768732	0.9464177000781826	0.9302506771138032	0.9326628570146972	0.9348436329967764	0.8453561636845327	0.864174	0.9306857069235659
855	0.9270828978026081	0.928879	0.9379071334952075	0.9238623804229129	0.9214895704371387	0.9213449935448403	0.9266254289786101	0.9310410385875718	0.8504704062913087	0.8617885665340257	0.9392872620166411
856	0.9248925309848094	0.9209944531608353	0.9327700445553042	0.9094361377447396	0.9126886370167291	0.9310125741528592	0.9301265343638501	0.9192038883023281	0.8301190882753056	0.8828254245058474	0.9203374282396487
857	0.9288665496426274	0.9258637582316211	0.9216021892500493	0.9114410695387186	0.9290451503809312	0.916096	0.8979517953456843	0.9340983404572843	0.8556508789265075	0.8856517907233638	0.9136686843051972
858	0.9318207584030509	0.9289579992066966	0.9293733657943909	0.9281740048468232	0.9411021600950393	0.9174371470474567	0.9424469293490219	0.9228179879262833	0.8549923114392772	0.8858623993856779	0.9148471392097386
859	0.9223033212222019	0.9205850782865065	0.9291309524507994	0.9248040193650044	0.937046	0.9260242855719855	0.9326646810471272	0.9355498738974642	0.8348823667246382	0.9014776129301506	0.9232439208940353
860	0.9048495878081315	0.9234732978987868	0.9050857455566216	0.9209803359587716	0.9213796970839496	0.9198034758387669	0.9092604015147951	0.8977478395826886	0.7990882942469997	0.8754711101124499	0.9358558162573533
861	0.9001011848897443	0.9289064486622084	0.9328933158828083	0.924283	0.9345816469622299	0.8777738051230304	0.919072	0.9302861830083587	0.8400726383816537	0.8903175812080483	0.9115240925348548
862	0.9262933752701928	0.9127992059284568	0.944269	0.920692	0.9189331878241032	0.9159254544402057	0.9186408340583623	0.9088195698433603	0.8108584133751088	0.8918971626814639	0.9257548810982891
863	0.936717	0.9143654411273339	0.9133445942294207	0.9293134566730982	0.9248780622609292	0.9239964597299829	0.930627	0.9285169086972804	0.8559980815974586	0.8886513490853073	0.934337
864	0.9245685791328996	0.9364530210636309	0.9336790164047853	0.911034	0.9232604594850268	0.9224511016106723	0.9034375519812596	0.9260354447154824	0.8597142060111891	0.8950029239062743	0.9343613487444756
865	0.9185181503323173	0.9247770299134644	0.9185346225778788	0.9152914525167118	0.917375	0.9436439525922832	0.8968182714158455	0.913815	0.8618776924245675	0.900801	0.9200466618232975
866	0.9172911044294212	0.9180172554904815	0.9191558047756573	0.9123501421011834	0.9241390221561163	0.9364694905911545	0.9352582320068631	0.9223473816601176	0.8593349392012151	0.8983060617871058	0.896835
867	0.8999118423269176	0.9267893833770129	0.9242188810103605	0.9193271671183386	0.9439536318917561	0.929573	0.9168681865999527	0.9212688463928602	0.8421787222778031	0.8640385743755484	0.9425267473456491
868	0.9178171306523819	0.9319946323027483	0.918739	0.9223078192841652	0.9379115696971544	0.9390461256030991	0.932575	0.9354476115308087	0.8184729443946192	0.9002156651007956	0.9338091924084687
869	0.9299055737369538	0.9269717894892752	0.9292618322026919	0.9274508074182065	0.9016091219692681	0.9420089500283741	0.9277353799946468	0.9129680769386183	0.840316	0.8873752694579141	0.9422960234418388
870	0.9113703006448656	0.8947607803742184	0.9170870771968246	0.9286258557702208	0.9329163423359741	0.9354011028354422	0.9032529779154891	0.9292	0.8049349698383215	0.8835776651880015	0.9234991325840227
871	0.9282557817740125	0.9349501792683512	0.920804	0.9181261593354126	0.9343797627607362	0.9353621131050277	0.9094998346192422	0.9346635952586861	0.8606352001926835	0.8866915593617527	0.9428242985260413
872	0.9161488684673742	0.9307008329985942	0.9200597775947899	0.9118024921558089	0.9204553431803885	0.9261126437631264	0.8893828961400492	0.9199432425351344	0.8255954853557582	0.8669704722697024	0.9268000072153667
873	0.9301365138963377	0.903442	0.8979029961900287	0.9121113545533114	0.9257906577242168	0.9326940757953521	0.9017469452814424	0.9100617989193398	0.8436752096088442	0.8695316255084825	0.924009
874	0.9240661706984891	0.9089571085853971	0.9265270416402176	0.9404402732884013	0.9312843916306401	0.9288745122972739	0.9182489556784966	0.9212140329177312	0.8415087140318473	0.8867617604738159	0.9372017187219119
875	0.9204604956203035	0.9299164087621125	0.9264442922770805	0.9086115695943856	0.9324507854055983	0.9279312779020054	0.9290278978038252	0.9227605858435766	0.8352952757238048	0.8639841827328727	0.9335552190691402
876	0.9410794554726195	0.9291091976879605	0.9253481924545249	0.9253196909773013	0.9230373265760807	0.9250078926101178	0.9386621524706318	0.914705	0.8436202335077367	0.88038	0.9353738513998529
877	0.9167286148832743	0.9024499841791478	0.9270043442443365	0.91861	0.9363819207345287	0.9283725499720165	0.9296153091946965	0.9286751329196352	0.8375519780904193	0.8715459348765718	0.9363831054123829
878	0.9366097998589747	0.9226244567816928	0.938552	0.9284474349731223	0.9284364116565318	0.9411378718089776	0.8921486985972235	0.9303324096348163	0.8588623309636719	0.897886	0.937051
879	0.9119577268685487	0.9265829452839441	0.9176935043870483	0.8928500871023562	0.9374104536799872	0.9294573103711447	0.9072636527370671	0.9253455206523107	0.8336106719436182	0.8904845897178745	0.9470375507470359
880	0.9186781837347303	0.9214555420309188	0.9376137892331888	0.9259991065193988	0.9365079205778561	0.9239663705355868	0.9318731824875113	0.9322790446998523	0.8499586397841463	0.8917500963683889	0.9130180250384232
881	0.9377252302427177	0.9029630805853522	0.9138042438553307	0.932314	0.9316522331183634	0.929198	0.9354725058323778	0.9272772684759255	0.8578470384688389	0.8827754513918462	0.9274531750219508
882	0.9291153500623495	0.9329180795755779	0.9337544578662025	0.913232	0.9160955955731763	0.9372472577737659	0.8741038862822192	0.9226489187136253	0.8457330832633629	0.8666502036482869	0.9176578419288393
883	0.9279135713533199	0.8958883527681352	0.9247974394008417	0.9202607529076658	0.9136103024216681	0.9392118387964907	0.9104554035181345	0.9358093415547977	0.825125	0.8850537507527095	0.9498807880203096
884	0.9324549158046987	0.9181038950642281	0.9275489149743172	0.9300808670389827	0.9145813494173964	0.9287815863429374	0.9178766109885734	0.9364132895286467	0.8511201928566765	0.8974251409311121	0.9215083234696974
885	0.9155147420853983	0.897835	0.9313791223475921	0.9104002750323438	0.9241560167783949	0.9246207866899532	0.9166553602657311	0.9197618095530521	0.8184290734834604	0.8900283980812684	0.9295160894864893
886	0.9295879879263428	0.9164415941767446	0.9182972900164548	0.9104991532227845	0.9390591888399042	0.9351226784097106	0.9340540183875924	0.92816	0.8617235925845904	0.8823214198066979	0.9378669569631813
887	0.9417653321103837	0.9346461424007282	0.9033206683779517	0.9240749954191142	0.9363457434319704	0.9207542480083374	0.9269225363042695	0.904062	0.8102646400234461	0.8924594757509164	0.9288685498189521
888	0.8920522094396803	0.9185687425429472	0.9198223399330467	0.9054669878710371	0.9397501127494636	0.9401336786525307	0.9184487823771319	0.926013	0.8475225740141026	0.8816705578292344	0.9330911444595164
889	0.9254033884092047	0.9285847016589659	0.9287390901127405	0.9325915759163116	0.9287695484597438	0.926667	0.91927	0.919542	0.8521658563580721	0.8510405225233172	0.9259893240418544
890	0.9290280118050066	0.9323823489463265	0.9284013446086594	0.9088131517840956	0.9406360989782399	0.9403469902693434	0.9145634362452083	0.9317913366603539	0.7967354255868407	0.8859078311652242	0.9462724933655943
891	0.9277548467367512	0.9142546125624601	0.9202878138188001	0.9134240093782716	0.9311686917851658	0.9349419921459886	0.921575	0.929121	0.8441020687394936	0.8690308321100996	0.9439975515336753
892	0.9336519698112197	0.929208	0.9133833443073435	0.9185896837444268	0.9079902051726294	0.9339096286809938	0.9304436565070443	0.9195139790861117	0.8564957865564844	0.8848687416272364	0.9314532708511548
893	0.9208441527713435	0.920462	0.9186499066670701	0.9300876486287468	0.9421226373057496	0.937996	0.8996754748306179	0.9359629098378242	0.8122546464138642	0.8962822739704932	0.9414152900602817
894	0.926242	0.9268212719903368	0.9062952122745607	0.9227867557081937	0.9324401764030055	0.9250549916068793	0.91268	0.9152008390981269	0.8621639726740697	0.8799807717171187	0.9103214883776821
895	0.9295389193297842	0.9172790149890704	0.8943881628731206	0.8969038117418578	0.9171779589432469	0.9354517740409551	0.9269251815182998	0.9196430563870435	0.8492928298807432	0.8667403123343527	0.921218
896	0.9396479529989022	0.9258327777102195	0.926183	0.9181670055352241	0.9391129800935032	0.9260607497278044	0.9343607327800625	0.9190996505777264	0.8187421332284746	0.8905819934756326	0.9261374152950438
897	0.9312778174008012	0.9241057587725703	0.9280001407306295	0.914456	0.940518	0.9366274286075496	0.9273116042872714	0.9149095708399807	0.8589160503586535	0.8853008930112232	0.9324256449567416
898	0.9086107078878741	0.9206189145068874	0.9274935987848558	0.9263123128824264	0.9282426841523128	0.930251	0.8903955317772152	0.8889301469709373	0.8565374773631077	0.880565	0.9456061001989713
899	0.9346788498491979	0.9384155344335685	0.9194297256981264	0.9017900697870995	0.9369454378470593	0.9327628117436016	0.9153216418558708	0.9143639034237937	0.8533285907975973	0.888879	0.933574
900	0.9233056092410522	0.9352624849277709	0.9333671977963536	0.92655	0.93768	0.9240490762876002	0.9207693353604334	0.9368054143664059	0.8435299973623741	0.8500760887915595	0.9341682438797204
901	0.9316003771757293	0.9333427856341721	0.9283073943803009	0.9252936700809408	0.9221281072824203	0.8918308595490366	0.9209165361748485	0.9326608918053969	0.8176625806498155	0.8866215693999321	0.9232474930685092
902	0.9247221921475062	0.9182727947573966	0.9382752670521083	0.9238479698582477	0.9365076980195899	0.9414467737936085	0.9237321447182779	0.9293354072080375	0.857182	0.8872148035220523	0.9015634891721682
903	0.9407793474749123	0.9289016579515553	0.9296445137150992	0.9097304448240465	0.9407620877650158	0.9205205976630201	0.8970405714232135	0.9318266056240089	0.8334188003992584	0.9080335720802807	0.9166391630967811
904	0.9299243643190065	0.9126723327619602	0.9384196639071365	0.8955670170757475	0.9177786720819464	0.9335306218606095	0.9324459902647808	0.9318665733109548	0.8259011086239594	0.9030715277688476	0.9284541737206132
905	0.9190586227874198	0.9239462913652486	0.9340745060806405	0.8969682101416324	0.9322839598423512	0.9353885168260336	0.8894131975878474	0.8943593553339975	0.7983790687690477	0.8784760149490549	0.9210605364704653
906	0.8936705208790963	0.9121471672100252	0.9415555483752214	0.9293756546696106	0.9361565846435844	0.9190740719048819	0.9340381443719391	0.9219610107993566	0.8480816670519353	0.8925588261598233	0.9385440281749088
907	0.9282864197353252	0.9240680232275669	0.9324588207242489	0.9343087024083633	0.9186859176249851	0.9391488428592611	0.9271521044342401	0.9328218638277659	0.8464649859956876	0.8863081041234114	0.9354895761679225
908	0.9251784455578294	0.9032203691610542	0.9276281319723944	0.9092828854675659	0.9338052371567633	0.9398216025331956	0.9322874830450144	0.9274523556550853	0.8650097276361064	0.8913471140654949	0.9373862104819305
909	0.9323364274007584	0.9135189892896759	0.9188103919138139	0.8957918760231663	0.9370965457395904	0.931097	0.9128983086358227	0.920618	0.7622215452912259	0.8750225712103514	0.9319475094900719
910	0.9225957923033307	0.9360096383962813	0.907556	0.9287213643502438	0.9474997270807013	0.9262897217788425	0.9039723491513503	0.9215605048213551	0.8629806483445366	0.8298336201992637	0.9473965126197642
911	0.9278449832965313	0.937078	0.9359785634817795	0.919282	0.9257781171082171	0.9105935898993113	0.9126777892388447	0.9234132226813097	0.8278546570617673	0.8754687860756629	0.9306817772893679
912	0.9234226295401732	0.9296839094581917	0.9214304073041722	0.933247	0.9272272544028513	0.927805	0.9153952476775268	0.9064472788289544	0.8299983299661772	0.8853109286148433	0.9374602977354249
913	0.9302906550307651	0.9160909619061356	0.9242139332677909	0.8931736126771863	0.9336046597394193	0.9241483671414221	0.9032097589350581	0.9267619798373846	0.8517773029649482	0.883523	0.9230214355282432
914	0.9303034628854672	0.8981807159125447	0.9259768495835554	0.9233233389100757	0.9345023501667115	0.9136051602145187	0.9298036578933541	0.9284891919608227	0.8508451804783699	0.8864599208507696	0.9222539762496476
915	0.932289	0.9030959604259107	0.9252994296940621	0.8983831877038255	0.9276840226631312	0.9335747434977332	0.9176717182646604	0.935418	0.8660228921114621	0.8285564773088754	0.940434
916	0.9340080507428024	0.8909528300072164	0.9222595090569784	0.9172155096416305	0.9441670828310302	0.9357767821397617	0.8880947747420597	0.9152694045896951	0.850963	0.8697471160875767	0.9239236932520682
917	0.9169885251606009	0.914643	0.9327311456626497	0.9251535938754014	0.9434402172540128	0.9290601121192773	0.9252148537306342	0.9189057005961344	0.8604997687214537	0.8876082404429241	0.9311888354516067
918	0.9236019241190164	0.9177629663606276	0.9328846833241222	0.883723	0.9301253425190155	0.9410339707192873	0.9192340414080967	0.934781	0.8374442387713644	0.8908374700087581	0.9434123395930091
919	0.9300782065859664	0.9143065017586098	0.9235744689675605	0.9023514406868347	0.929039	0.938292	0.9050188317201145	0.9018866816097065	0.8516566175465701	0.8799570399092649	0.9355455132312237
920	0.9222782463619097	0.9180039006865383	0.9227561169984532	0.9133040808702365	0.9271809371766552	0.9234519271362225	0.9018737312833728	0.9252459774881123	0.84846	0.8614826145006037	0.948797
921	0.9395394746972603	0.9340119777053381	0.906734	0.9417746960863215	0.9338837652403674	0.9185143255092371	0.9080482495263977	0.9434878132321199	0.8568260499756942	0.8812624550493969	0.9319558247453277
922	0.8929999587978451	0.9374053365848418	0.9348604220622354	0.921274	0.9432449116625039	0.9355597724561215	0.9335474499922389	0.9217998037451697	0.844935	0.8805074968834106	0.9126239487025104
923	0.9260527243494767	0.9215110960465183	0.9266996467534456	0.8877121403488882	0.9094816084376542	0.919703	0.9227935257677892	0.9215087594212149	0.8538953538973519	0.880938	0.9291096915030621
924	0.911631	0.9271048011886645	0.9155880697027542	0.9101302904985843	0.9326984310395802	0.9332591593833598	0.8812720016099955	0.9239735292547325	0.8613620679390706	0.8683923671053416	0.9243255800560841
925	0.9169074596808587	0.9152538355365878	0.9332688595718432	0.9192771795325868	0.930575	0.944069	0.9239123827993782	0.9255104839039062	0.859344	0.8606390109743839	0.9281776944251007
926	0.9280997668180939	0.9106091143360591	0.9331762418127328	0.9230039012473065	0.9241382250684587	0.9421858528090683	0.9027400635100254	0.9091702222355975	0.8253341705893015	0.8843057864307046	0.9101579509345309
927	0.9152837923307043	0.9226980819805359	0.9137400490911967	0.8907211378416297	0.9436307093387186	0.9225457007474064	0.9232827926907335	0.9396433481308984	0.8413205523097453	0.889672	0.9216096694227053
928	0.9197626327533905	0.927762	0.9431111550066589	0.9207637482994144	0.9365748427094738	0.9369929789086563	0.9252316532380761	0.9192873527440842	0.8590289907349455	0.8998366889535024	0.9431384241301296
929	0.9272395277842087	0.928604	0.9247388937999572	0.9248429371357628	0.9246604953313677	0.921669	0.9200230249237678	0.9337041401232498	0.8522382707563448	0.893123	0.9259224644677898
930	0.9346020178763579	0.9264538091859633	0.9234114514228743	0.9261792177347018	0.9337501617856113	0.9250819321712435	0.9237827471289135	0.9341976217375222	0.8628234756328372	0.8538744695239192	0.9277015696847167
931	0.9236524405007438	0.9343842918517639	0.9209005187914777	0.9037858837495711	0.9414239318003605	0.927213	0.9136033713315144	0.9249419299120771	0.8451495943755434	0.8846071896197544	0.9181555915169821
932	0.9241974314376405	0.9146915699444217	0.9349981156348974	0.9289895547013568	0.9229748849757912	0.9111382616570798	0.9253437177864245	0.9269992598852609	0.8449225851003698	0.8476922741456892	0.9256752518237964
933	0.9310398114525344	0.9213766264120484	0.932739	0.926674	0.9430447718730284	0.9370667105341811	0.9141406544402065	0.927619	0.8542707549093419	0.8370430249712947	0.9269245009377872
934	0.9265634819055587	0.944186	0.9143258445170888	0.9211824761888049	0.9326810168245958	0.9175381260803422	0.9193248031677265	0.9190388308989186	0.8471954431315142	0.8888311463510433	0.9325992656728641
935	0.9283343005763777	0.9198667850978235	0.9106656595962636	0.9081001736538883	0.9364393473633559	0.9100842788650968	0.921548	0.9154081496134856	0.8554580839975758	0.882333	0.9056002929836525
936	0.9264127958618212	0.9116127873602757	0.9276208496797425	0.9211397871986299	0.9269634350419539	0.9363281487779053	0.919723	0.8968052997236019	0.8442907262714394	0.8584355258053734	0.928962
937	0.9395596924521988	0.9346705098577363	0.9301544323227079	0.8979256281164133	0.9128102433886205	0.9355146196356139	0.9006944799510727	0.9352849149316365	0.820222	0.8788288569877886	0.9146879617844684
938	0.9244763614758696	0.9232822918204012	0.9300308608489203	0.9143503324066832	0.9252404632299907	0.9320632020263623	0.8910798113919993	0.8991880210569722	0.7687414329878852	0.8718440904839512	0.9297329123593943
939	0.9222910962323204	0.9016633762506383	0.935499	0.922148	0.9415505805662108	0.9206879057318741	0.9352707611606783	0.9243827365758228	0.8466248343891767	0.8950168445108542	0.9351073747000956
940	0.9256513565406304	0.9409146092886544	0.9255585491879702	0.9178095729039744	0.9184353716122202	0.9271999678385447	0.8977490399976362	0.8906064636041758	0.8291405445251221	0.8818650711692532	0.9411133505726091
941	0.9201667002428461	0.897107	0.9080944416625006	0.9367847253943485	0.9156549291108111	0.9365294027984331	0.9208458038022799	0.9203955630241318	0.8505964243036607	0.8939587216406529	0.9413169390335009
942	0.9084078631476994	0.9366628926040578	0.9285489338880258	0.9225582627927144	0.9459950923687452	0.9344194580270849	0.9277064746024896	0.9360798339874781	0.8434374918601185	0.8961970154263242	0.936409
943	0.9204895414783346	0.9244868122499434	0.9254670165606778	0.9185129094289219	0.9281391969232365	0.9398721189805704	0.90946	0.915846	0.8402408511624846	0.8948975493085243	0.9244579984953214
944	0.9363871697871725	0.9271432113457589	0.9293995518180442	0.9280439567523989	0.939524	0.9464073277475786	0.8895429474496275	0.9241677887497368	0.8079491337562198	0.9050555891678819	0.9399457810615885
945	0.9252022186963361	0.934781	0.926906	0.92445	0.9346779025835839	0.9185556850671686	0.9196749241527806	0.925499	0.823557	0.8740725614949296	0.9258473150923991
946	0.9398392528213806	0.9222608881551578	0.9357895610407776	0.9285142117256743	0.9163132919598593	0.9201823453444394	0.9264612990574351	0.9043770271852541	0.8214181371233951	0.8463155873766498	0.9410788133097029
947	0.9067843636607483	0.9326008157725421	0.9235466331772159	0.9311364160716333	0.90594	0.9217029822429087	0.9096120051181071	0.9348813411234107	0.8587290940553919	0.889595	0.9340755541449636
948	0.9293859866047497	0.9313135580430113	0.89823	0.9075664602174153	0.9283805746833816	0.9155495990598668	0.9167971903536225	0.9298229352841219	0.821659	0.8844392143425845	0.9286378910628998
949	0.9226784141078392	0.9098617898757168	0.9237875734779202	0.9307775812416341	0.9416118012421568	0.9276577000078111	0.9136656686794211	0.928806	0.8436677042540393	0.8787026348760437	0.9200967622139331
950	0.9399533101580431	0.9354858427660188	0.9338221390215291	0.916648	0.9364580182886214	0.9273971962984306	0.9395970582027423	0.9239304702632485	0.842862	0.8883615705522344	0.9267518498808013
951	0.9084630540338671	0.9139314476598985	0.928856	0.9091161820843534	0.9350709268477015	0.9225774860567812	0.9078199782581483	0.9304059384147506	0.8565290911012231	0.8971790876681927	0.9488567038761574
952	0.9326573699177292	0.9456034078946449	0.9125123116931753	0.9012379966133678	0.9319427450729442	0.925918	0.9161558774081456	0.92936	0.8500966469974418	0.870575	0.9281758175756794
953	0.9349744619131393	0.9151694740293599	0.918411	0.926683	0.9197715317959478	0.9288635167500181	0.9183910444534024	0.9078196255042714	0.8370549933345017	0.8844038196699272	0.91019
954	0.9314174086058701	0.9340315176699558	0.9326874396995026	0.9222981472644226	0.9245194128994695	0.937855	0.9034794487544666	0.9332372731995635	0.8494502572140533	0.8904970998112481	0.9005248764959232
955	0.9376477841243076	0.9277769253028498	0.9175662385422192	0.9259383163473952	0.9028836102543724	0.9124618550145296	0.9131724026156766	0.8980327833539173	0.8603256916184787	0.8955065095088878	0.9321469748643447
956	0.9366511568274606	0.9303066518073374	0.918759	0.9071507870611399	0.9373480755544028	0.9248251076723829	0.9221200923373327	0.9189427435655054	0.8273042751283751	0.8917214497422067	0.9189495961255051
957	0.9302104144093182	0.9096159580814336	0.9167706202128857	0.9234267625819879	0.9312494464701058	0.9029192328873631	0.9249460943737742	0.9197597065245431	0.8312404123989104	0.8744197978892753	0.9207299135342341
958	0.9368404870916738	0.9215987927640386	0.9262548843216175	0.8994945572399484	0.9320480789550087	0.9147684543880168	0.9226811281619284	0.9208798647181531	0.826661	0.8786155613749119	0.9408313681154596
959	0.9174056130258602	0.9262962255265713	0.9217137611183291	0.9088324340773859	0.9470353877446662	0.9291104818620847	0.8992025042452797	0.9230361533205695	0.8378605699002439	0.8769534163346152	0.9101726147551803
960	0.931374	0.9236167570053649	0.9071974455777154	0.9167998724771897	0.9328158743760981	0.9379950497518909	0.9207793352220092	0.9311046802313169	0.8378225531290843	0.8844739883226634	0.9241171600547016
961	0.9195354347674906	0.9232644086839282	0.9240681829703346	0.8777617180541903	0.9365032301511611	0.9293353488430554	0.9137114955635893	0.9296818790844239	0.8364545027072143	0.8408673460509742	0.9404051906940515
962	0.9328732416954495	0.9246297169598899	0.9349715082679338	0.932993	0.9426117500633466	0.9368711843446157	0.9270295996306454	0.9306423838721933	0.8713267543859649	0.7554003621292523	0.9122885256896757
963	0.9390942280141867	0.9197836322270564	0.9339267260170215	0.9334429401573974	0.940143	0.9243110864377015	0.9208031818818421	0.9195055943038908	0.8303707092054664	0.8984122364532499	0.9291932364168541
964	0.930785	0.9179148684643083	0.9290642644457144	0.9174203431352413	0.9394076237137186	0.9215875922507355	0.9044427384875876	0.9243985873911532	0.8410146884597981	0.8912857084403328	0.9091143759832703
965	0.9410487273638676	0.9180686979760737	0.9233435145388275	0.9010203062983763	0.934882	0.921245	0.911735	0.9336240623846547	0.747496	0.8917047023854647	0.9136061870079331
966	0.9270257146908055	0.9332994536782627	0.9175285050130877	0.9206388717622492	0.9360120581394694	0.9392771473099008	0.9336337288742296	0.913625	0.8068313339679527	0.8918486885121085	0.9266489877499884
967	0.9282098818636468	0.9187793087045362	0.9279855516923236	0.928295	0.9269471850546245	0.9322775852740462	0.93399	0.9126959460672236	0.8526098706754479	0.8904037420557801	0.927435
968	0.9046533569711342	0.930219	0.9360299075973438	0.9248074533415616	0.9277019649075786	0.939451	0.9237339573198915	0.928957	0.8503257250014333	0.8906138088737413	0.9359080069931124
969	0.9266773597179444	0.9295921464224107	0.9202658030781197	0.9050494199116543	0.9292387816302121	0.9372211508766557	0.9027757824220236	0.9321964330727875	0.8126225255859032	0.8927010000361432	0.932503
970	0.9305129819726723	0.9311775752912484	0.92251	0.9298287560689737	0.9151714586413687	0.9231735630595614	0.9234924327223473	0.9048890872914309	0.844307	0.8650247177525308	0.9166371217256244
971	0.9263118458798376	0.9357108681453029	0.9294705570039682	0.9158019893623414	0.9279226794094095	0.9347868075653869	0.9210899862877702	0.9190975074868675	0.8449887970076981	0.8889766423486057	0.9428522728212035
972	0.9190156554244762	0.9329569987929642	0.8898748419025507	0.9269002277331082	0.9314599742058498	0.9307154459693127	0.9196802184068645	0.9213095074147606	0.85475	0.8918365421386536	0.9349226267624656
973	0.9206588426560626	0.9387687075633985	0.876333	0.9165600828987069	0.9241363236011664	0.9367071472648101	0.9334020710712432	0.907578	0.8290703387370799	0.8838660163864488	0.9361712214255591
974	0.9401985460669046	0.9061716616485247	0.9061342119102922	0.928584	0.9401809037544206	0.941191	0.904317	0.9131896551291725	0.8515425856912322	0.897027	0.9241394441598387
[truncated: 1,026 more rows]

## Sheet: 3_JaccardDist_Bootstrap_27Aug24
FunctionalOutcome	Num_SigEnrichProtoParam	Jdist_SigEnrichProtoParam	Num_EnrichedProtoParam	Jdist_EnrichedProtoParam	SigOverEnrichLog2Fold	Num_StudiesReportedValue
[truncated: 15 more rows]
