# Supplementary material for: A community-oriented, data-driven resource to improve protocol design for cardiac modelling from human pluripotent stem cells
Source: Research Square preprint supplement (doi:10.21203/rs.3.rs-5017297/v1), 2024-09-27
Supplement: Supplementary file 4 [file d126ccda7edbe6efca185cfb.xlsx]

## Sheet: Sheet1
Reference	Backbone Media	Media	Force (mN) (48)	Stress (mN/mm2) (37)	Upstroke Velocity (um/s) (40)	Amplitude (F/F0) (50)	Beat Rate (BPM) (54)	Time to Peak (ms) (40)	Time to Relaxation (ms) (10)	Conduction Velocity (cm/s) (14)	AP Conduction Velocity (cm/s) (27)	AP Amplitude (mV) (41)	Resting Membrane Potential (mV) (44)	Max Capture Rate (Hz) (15)
Funakoshi, S. et al. Generation of mature compact ventricular cardiomyocytes from human pluripotent stem cells. Nature Communications, 12, (2021).	DMEM containing low glucose (2 g/L)	DMEM				Q1
Birket, M. J. et al. A Human Stem Cell Model of Fabry Disease Implicates LIMP-2 Accumulation in Cardiomyocyte Pathology. Stem Cell Reports 13, 380–393 (2019).	DMEM/F12	DMEM									Q2	Q2	Q2
Lin, B. et al. Culture in glucose-depleted medium supplemented with fatty acid and 3,3’,5-Triiodo-L-thyronine facilitates purification and maturation of human pluripotent stem cell-derived cardiomyocytes. Front Endocrinol (Lausanne) 8, (2017).	DMEM Medium (No Glucose)	DMEM				Q4						Q1	Q1
Lin, B. et al. Culture in glucose-depleted medium supplemented with fatty acid and 3,3’,5-Triiodo-L-thyronine facilitates purification and maturation of human pluripotent stem cell-derived cardiomyocytes. Front Endocrinol (Lausanne) 8, (2017).	DMEM Medium (No Glucose)	DMEM				Q4						Q1	Q1
Yang, X. et al. Tri-iodo-l-thyronine promotes the maturation of human cardiomyocytes-derived from induced pluripotent stem cells. Journal of Molecular and Cellular Cardiology, 72, (2014).	serum-free RPMI/B27 (plus L-glutamine)	RPMI	Q4			Q1
Huang, C. Y. et al. Enhancement of human iPSC-derived cardiomyocyte maturation by chemical conditioning in a 3D environment. J Mol Cell Cardiol 138, 1–11 (2020).	RPMI/B27/Insulin	RPMI		Q3		Q2					Q3			Q2
Parikh, S. S. et al. Thyroid and Glucocorticoid Hormones Promote Functional T-Tubule Development in Human-Induced Pluripotent Stem Cell-Derived Cardiomyocytes. Circ Res 121, 1323–1330 (2017).	RPMI/B27/Insulin	RPMI			Q1	Q2		Q4
Schwan, J. et al. Anisotropic engineered heart tissue made from laser-cut decellularized myocardium. Sci Rep 6, (2016).	RPMI/B27/Insulin	RPMI	Q3	Q3				Q2
Tsan, Y. C. et al. Physiologic biomechanics enhance reproducible contractile development in a stem cell derived cardiac muscle platform. Nat Commun 12, (2021).	glucose-free RPMI/B27	RPMI			Q1	Q3	Q2					Q4	Q1
Bedada, F. B. et al. Acquisition of a quantitative, stoichiometrically conserved ratiometric marker of maturation status in stem cell-derived cardiac myocytes. Stem Cell Reports, 3, (2014).	RPMI/B27/Insulin	RPMI
Gentillon, C., Li, D., Duan, M., Yu, W. M., Preininger, M. K., Jha, R., ... & Xu, C. (2019). Targeting HIF-1α in combination with PPARα activation and postnatal factors promotes the metabolic maturation of human induced pluripotent stem cell-derived cardiomyocytes. Journal of molecular and cellular cardiology, 132, 120-135.	DMEM (10% fetal bovine serum, 2 mM L-glutamine)	DMEM
Sebastião, M. J. et al. Bioreactor-based 3D human myocardial ischemia/reperfusion in vitro model: a novel tool to unveil key paracrine factors upon acute myocardial infarction. Translational Research 215, 57–74 (2020).	DMEM/F12	DMEM
Poon, E., Keung, W., Liang, Y., Ramalingam, R., Yan, B., Zhang, S., ... & Li, R. A. (2015). Proteomic analysis of human pluripotent stem Cell–Derived, fetal, and adult ventricular cardiomyocytes reveals pathways crucial for cardiac metabolism and maturation. Circulation: Cardiovascular Genetics, 8(3), 427-436.	DMEM/F12	DMEM
Wickramasinghe, N. M. et al. PPARdelta activation induces metabolic and contractile maturation of human pluripotent stem cell-derived cardiomyocytes. Cell Stem Cell 29, 559-576.e7 (2022).
